# Supplementary material for: Lipid accumulation of Chlorella sp. TLD6B from the Taklimakan Desert under salt stress
Source: PeerJ. 2021 May 31;9:e11525. doi: 10.7717/peerj.11525 (PMC8174150; doi:10.7717/peerj.11525)
Supplement: Supplemental Information 1 [file peerj-09-11525-s001.xlsx]

## Sheet: Table S1
Table S1 Components of the BBM medium.
Reagent	Weight	Reagent2	Weight or Volume
NaNO3	250 mg	FeSO4·7H2O	8.82 mg
K2HPO4	75 mg	CuSO4·5H2O	1.57 mg
CaCl2·2H2O	25 mg	MgSO4·7H2O	75 mg
KH2PO4	175 mg	MoO3	0.71 mg
NaCl	25 mg	H3BO3	11.42 mg
ZnSO4·7H2O	8.82 mg	KOH	31 mg
EDTA	50 mg	Co(NO3)2·6H2O	0.49 mg
MnCl2	1.44 mg	Distilled water	1000 mL
