# Supplementary material for: Lipid accumulation of Chlorella sp. TLD6B from the Taklimakan Desert under salt stress
Source: PeerJ. 2021 May 31;9:e11525. doi: 10.7717/peerj.11525 (PMC8174150; doi:10.7717/peerj.11525)
Supplement: Supplemental Information 2 — Values of the indicated parameters for three independent measurements under different NaCl treatment conditions. [file peerj-09-11525-s002.xlsx]

## Sheet: Table S2
Table S2 Data on growth, biomass, carbohydrate content, lipid content, specific growth rate, and lipid productivity of Chlorella sp. TLD6B under different levels of salt stress.
Parameters	Cultivation time under salt stress (days)	Adding NaCl concentration ( M)
		0			0.1			0.2			0.4			0.6			0.8
OD680	0	0.245	0.246	0.244	0.251	0.25	0.252	0.257	0.256	0.258	0.212	0.211	0.213	0.2	0.199	0.201	0.189	0.188	0.19
	6	0.441	0.437	0.439	0.451	0.449	0.453	0.445	0.443	0.447	0.385	0.383	0.387	0.405	0.403	0.407	0.368	0.366	0.37
	12	0.675	0.672	0.678	0.736	0.733	0.739	0.749	0.746	0.742	0.562	0.559	0.565	0.506	0.504	0.508	0.436	0.434	0.438
	18	1.21	1.17	1.26	1.1	1.05	1.15	1.06	1.01	1.11	0.796	0.8	0.792	0.668	0.638	0.698	0.496	0.476	0.516
	24	2.103	2.013	2.193	1.598	1.528	1.668	1.64	1.57	1.71	1.206	1.156	1.256	0.789	0.749	0.829	0.496	0.476	0.516
	30	2.225	2.125	2.325	1.789	1.709	1.869	1.868	1.778	1.958	1.502	1.432	1.572	0.896	0.856	0.936	0.542	0.512	0.572
Biomass (g L−1)	0	0.095	0.105	0.1	0.095	0.105	0.1	0.095	0.105	0.1	0.095	0.105	0.1	0.095	0.105	0.1	0.095	0.105	0.1
	6	0.16	0.154	0.167	0.16	0.154	0.167	0.18	0.172	0.188	0.15	0.142	0.158	0.12	0.115	0.125	0.09	0.045	0.095
	12	0.24	0.23	0.25	0.24	0.23	0.25	0.29	0.28	0.3	0.2	0.191	0.21	0.21	0.2	0.22	0.18	0.172	0.188
	18	0.41	0.43	0.39	0.45	0.47	0.43	0.52	0.54	0.5	0.42	0.44	0.4	0.32	0.33	0.31	0.21	0.22	0.2
	24	0.68	0.71	0.65	0.73	0.76	0.7	0.78	0.82	0.74	0.51	0.53	0.49	0.39	0.41	0.37	0.26	0.27	0.25
Carbohydrate concent (%)	0	21.5	22.32	20.68	21.5	22.36	20.64	21.5	22.6	20.39	21.5	22.5	20.5	21.5	22.45	20.55	21.5	22.42	20.58
	6	33.8	34.75	32.85	27.6	29.25	25.95	30.8	32.86	28.74	25.6	27.2	24	22.6	24.02	21.18	21.8	23.26	20.34
	12	41.6	43.42	39.78	34.6	36.52	32.68	37.2	39.25	35.15	30.1	32.05	28.15	25.2	26.62	23.78	18.6	19.72	17.4
	18	38.5	40.3	36.7	32.2	33.62	30.78	36.2	38.12	34.28	29.2	30.52	27.88	20.9	21.88	19.92	12.6	13.43	11.77
	24	31.2	32.15	30.25	23.2	24.02	22.38	27.6	28.52	26.68	19.3	20.16	18.44	16.6	17.32	15.88	8.2	8.8	7.6
Total lipid concent (%)	0	20.11	20.79	19.43	20.11	20.79	19.43	20.11	20.79	19.43	20.11	20.79	19.43	20.11	20.79	19.43	20.11	20.79	19.43
	6	15.29	16.27	15.78	23.86	24.64	23.06	25.61	26.47	24.35	21.34	21.99	20.69	18.67	19.25	18.09	17.36	17.98	16.84
	12	18.46	19.04	17.88	25.32	26.17	24.47	26.79	27.69	25.89	23.5	24.28	22.88	21.22	21.84	20.6	20.22	20.87	19.57
	18	19.52	20.17	18.87	26.2	27.01	25.39	28.89	29.81	27.97	26.4	27.25	25.55	21.7	22.42	20.98	19.55	20.23	18.87
	24	21.83	22.53	21.13	29.95	30.87	29.03	31.27	32.25	30.29	26.15	27.05	25.25	25.12	25.9	24.34	22.76	23.51	22.01
Specific growth rate (mg L−1 d−1)	6	113.01	117.51	108.51	113.01	117.51	108.51	141.33	147.83	134.83	97.5	111.7	93.3	43.84	45.84	41.84	25.33	27.83	22.83
	12	97.5	101.7	93.3	97.5	101.7	93.3	114.68	119.68	109.68	69.17	72.67	65.67	134.56	140.56	128.56	166.67	175.67	157.67
	18	128.77	134.77	122.77	151.15	157.15	144.15	140.41	146.91	135.91	178.4	187.4	169.4	101.28	106.08	96.48	37.07	38.87	35.27
	24	121.65	127.15	116.15	116.33	121.13	111.53	97.5	111.7	93.3	46.69	49.19	44.16	47.57	50.07	45.07	51.36	53.86	48.86
Lipid productivity (mg L−1 d−1)	6	17.83	18.41	17.25	26.96	27.88	26.04	36.19	37.46	34.92	20.81	21.47	20.15	8.18	8.44	7.92	4.4	4.57	4.23
	12	18	18.59	17.41	24.69	25.55	23.83	30.72	31.8	29.64	16.25	16.81	15.69	28.55	29.42	27.68	33.7	34.84	32.56
	18	25.13	26	24.26	39.6	40.88	38.32	40.56	41.91	39.21	47.1	48.66	45.54	21.98	22.74	21.22	7.25	7.41	6.99
	24	26.57	27.49	25.65	34.84	35.95	33.73	30.49	31.49	29.49	12.21	12.65	11.77	11.95	12.34	11.56	11.69	12.09	11.29
Values of the indicated parameters for three independent measurements under different NaCl treatment conditions.
