# Supplementary material for: Lipid accumulation of Chlorella sp. TLD6B from the Taklimakan Desert under salt stress
Source: PeerJ. 2021 May 31;9:e11525. doi: 10.7717/peerj.11525 (PMC8174150; doi:10.7717/peerj.11525)
Supplement: Supplemental Information 3 — CK, the control; CK0, samples collected from the control group on day 0; CK01, the first biological replicate of CK0; CK02, the second biological replicate of CK0; CK18, the sample collected from the control group on day 18; Nacl1, samples collected from the low salinity treatment (0.1 M NaCl addition) on day 18; Nacl2, samples collected from the high salinity treatment (0.8 M NaCl addition) on day 18; PEG1, samples collected from the mild drought treatment (0.05 g/mL PEG-6000 addition) on day 18; PEG2, samples collected from the high drought treatment (0.1 g/mL PEG-6000 addition) on day 18; and so forth. Q20 (%) and Q30 (%) are the percentage of bases with a Phred value greater than 20 or 30. GC (%) is the percentage of G and C bases. Qphred is the Illumina HiSeq base quality value; Qphred = −10log10(e), where e indicates the sequencing error rate. [file peerj-09-11525-s003.xlsx]

## Sheet: Table S3
Table S3 Characteristics of RNA-seq data from individual samples.
Sample ID		Raw reads	Clean reads	Clean bases (Gb)	Q20 (%)	Q30 (%)	GC (%)
CK0	CK0_1	67174368	66421880	9.96	96.88	91.69	64.73
	CK0_2	68338704	67267362	10.09	98.3	95.34	65.63
CK18	CK18_1	63922902	62916688	9.44	98.28	95.27	65.72
	CK18_2	83471994	81632594	12.24	98.18	95.09	65.68
Nacl1	Nacl18_1	82456626	81316666	12.2	96.91	91.88	65.7
	Nacl18_2	89687578	88432994	13.26	97.04	92.07	65.88
Nacl2	Nacl18_3	81781860	80318438	12.05	98.26	95.22	65.59
	Nacl18_4	86993810	85227914	12.78	97.23	92.63	65.8
PEG1	PEG18_1	86636438	84856362	12.73	96.88	91.81	65.63
	PEG18_2	85896448	84630372	12.69	98.13	94.94	65.93
PEG2	PEG18_3	80665206	79427478	11.91	98.23	95.19	65.98
	PEG18_4	86052250	84776496	12.72	98.14	95	65.89
Total		963078184	947225244
CK, the control; CK0, samples collected from the control group on day 0; CK0_1, the first biological replicate of CK0; CK0_2, the second biological replicate of CK0; CK18, the sample collected from the control group on day 18; Nacl1, samples collected from the low salinity treatment (0.1 M NaCl addition) on day 18; Nacl2, samples collected from the high salinity treatment (0.8 M NaCl addition) on…
