# Supplementary material for: Lipid accumulation of Chlorella sp. TLD6B from the Taklimakan Desert under salt stress
Source: PeerJ. 2021 May 31;9:e11525. doi: 10.7717/peerj.11525 (PMC8174150; doi:10.7717/peerj.11525)
Supplement: Supplemental Information 4 — 1 the longest transcript of a given subcomponent was used as the unigene for functional annotation. [file peerj-09-11525-s004.xlsx]

## Sheet: Table S4
Table S4 Lengths of assembled transcripts and genes.
	200–500 bp	0.5–1 kbp	1–2 kbp	>2 kbp	Total
Number of transcripts	86127	39813	42068	51569	219577
Number of unigenes1	25648	36636	41666	51553	155503
1the longest transcript of a given subcomponent was used as the unigene for functional annotation.
