# Supplementary material for: Lipid accumulation of Chlorella sp. TLD6B from the Taklimakan Desert under salt stress
Source: PeerJ. 2021 May 31;9:e11525. doi: 10.7717/peerj.11525 (PMC8174150; doi:10.7717/peerj.11525)
Supplement: Supplemental Information 5 — 1N50 / N90, the length of the longest contig such that all contigs of at least that length compose at least 50/90% of the bases in the assembly. [file peerj-09-11525-s005.xlsx]

## Sheet: Table S5
Table S5 Characteristics of assembled transcripts and genes.
	Min length	Mean length	Median length	Max length	N50	N90	Total nucleotides
Transcripts	201	1394	752	23825	2658	571	306152039
Unigenes	201	1842	1297	23825	2837	870	286455147
1N50/N90, the length of the longest contig such that all contigs of at least that length compose at least 50/90% of the bases in the assembly.
