# Supplementary material for: Lipid accumulation of Chlorella sp. TLD6B from the Taklimakan Desert under salt stress
Source: PeerJ. 2021 May 31;9:e11525. doi: 10.7717/peerj.11525 (PMC8174150; doi:10.7717/peerj.11525)
Supplement: Supplemental Information 6 [file peerj-09-11525-s006.xlsx]

## Sheet: DEGs annotion of Nacl1
DEG annotions of the 0.1 M NaCl treatment (Nacl1) compared to the normal on day 18 (CK18).
gene_id	Nacl1_readcount	CK18_readcount	log2FoldChange	padj	Gene Length	NR GI	NR ID	NR Score	NR Evalue	NR Description	NT GI	NT ID	NT Score	NT Evalue	NT Description	KO ID	KO Name	KO Description	Http Link	Swissprot ID	Swissprot Score	Swissprot Evalue	Swissprot Description	PFAM ID	PFAM description	Gene Ontology Biological Pathway	BP Description	Gene Ontology Molecular Function	MF Description	Gene Ontology Cellular Component	CC Description	KOG ID	KOG Description
Cluster-31803.69617	0	5607.1	#NAME?	6.14e-67	5434	657401494	KEH40472.1	691	7.8e-70	small RNA degrading nuclease [Medicago truncatula]			64	1.05e-21		K14570	REX1, REXO1, RNH70	RNA exonuclease 1	http://www.genome.jp/dbget-bin/www_bget?ko:K14570	Q8L7M4	631	9.8e-64	Small RNA degrading nuclease 5 OS=Arabidopsis thaliana GN=SDN5 PE=2 SV=2	PF00260	Protamine P1	GO:0007283	spermatogenesis	GO:0003677	DNA binding	GO:0000786//GO:0005634	nucleosome//nucleus	KOG2248	3'-5' exonuclease
Cluster-31803.58815	10.6005	12781.3	-10.236	1.13e-63	2628	552816910	XP_005844806.1	1781	1.5e-196	hypothetical protein CHLNCDRAFT_26566 [Chlorella variabilis]>gi|307104450|gb|EFN52704.1| hypothetical protein CHLNCDRAFT_26566 [Chlorella variabilis]			697	0		K01919	gshA	glutamate--cysteine ligase	http://www.genome.jp/dbget-bin/www_bget?ko:K01919	A2YL07	1343	1.3e-146	Glutamate--cysteine ligase B, chloroplastic OS=Oryza sativa subsp. indica GN=GSH1-2 PE=3 SV=2	PF04107	Glutamate-cysteine ligase family 2(GCS2)	GO:0006749//GO:0042398//GO:0006750	glutathione metabolic process//cellular modified amino acid biosynthetic process//glutathione biosynthetic process	GO:0004357	glutamate-cysteine ligase activity	GO:0017109	glutamate-cysteine ligase complex	--	--
Cluster-31803.60098	10.1478	11586.8	-10.157	7.37e-63	2027	552826534	XP_005847048.1	432	3.1e-40	hypothetical protein CHLNCDRAFT_134697 [Chlorella variabilis]>gi|307106701|gb|EFN54946.1| hypothetical protein CHLNCDRAFT_134697 [Chlorella variabilis]	--	--	--	--	--	--	--	--	--	Q9LU72	198	5.9e-14	Probable inactive purple acid phosphatase 28 OS=Arabidopsis thaliana GN=PAP28 PE=2 SV=1	--	--	--	--	--	--	--	--	--	--
Cluster-31803.74128	0	3798.45	#NAME?	1.24e-60	3036	552824801	XP_005846676.1	1053	4.6e-112	hypothetical protein CHLNCDRAFT_135402 [Chlorella variabilis]>gi|307106328|gb|EFN54574.1| hypothetical protein CHLNCDRAFT_135402 [Chlorella variabilis]			244	5.05e-122		--	--	--	--	Q08448	200	5.2e-14	Putative lipase YOR059C OS=Saccharomyces cerevisiae (strain ATCC 204508 / S288c) GN=YOR059C PE=1 SV=1	PF01764//PF00187//PF07819	Lipase (class 3)//Chitin recognition protein//PGAP1-like protein	GO:0006505//GO:0006886//GO:0006629	GPI anchor metabolic process//intracellular protein transport//lipid metabolic process	GO:0008061//GO:0016788	chitin binding//hydrolase activity, acting on ester bonds	--	--	KOG4372	Predicted alpha/beta hydrolase
Cluster-31803.25797	34.7692	20465.7	-9.2012	3.48e-59	2865	552833193	XP_005848503.1	496	1.7e-47	hypothetical protein CHLNCDRAFT_144977 [Chlorella variabilis]>gi|307108160|gb|EFN56401.1| hypothetical protein CHLNCDRAFT_144977 [Chlorella variabilis]			232	2.23e-115		--	--	--	--	Q55E44	147	6.9e-08	Hybrid signal transduction histidine kinase E OS=Dictyostelium discoideum GN=dhkE PE=3 SV=1	PF00072	Response regulator receiver domain	GO:0000160	phosphorelay signal transduction system	--	--	--	--	--	--
Cluster-31803.105019	0.35585	2659.13	-12.867	1.43e-52	3725	552837389	XP_005849350.1	1293	8.3e-140	expressed protein [Chlorella variabilis]>gi|307109009|gb|EFN57248.1| expressed protein [Chlorella variabilis]			244	6.21e-122		--	--	--	--	--	--	--	--	PF05637	galactosyl transferase GMA12/MNN10 family	--	--	GO:0016757	transferase activity, transferring glycosyl groups	GO:0016021	integral component of membrane	--	--
Cluster-31803.7484	9613.22	32.3857	8.2135	1.38e-47	2799	545359209	XP_005645091.1	1863	5e-206	urea active transporter-like protein [Coccomyxa subellipsoidea C-169]>gi|384247059|gb|EIE20547.1| urea active transporter-like protein [Coccomyxa subellipsoidea C-169]			756	0		--	--	--	--	F4KD71	1728	3.2e-191	Urea-proton symporter DUR3 OS=Arabidopsis thaliana GN=DUR3 PE=1 SV=1	PF00474	Sodium:solute symporter family	GO:0006810//GO:0055085	transport//transmembrane transport	GO:0005215	transporter activity	GO:0016020	membrane	KOG2348	Urea transporter
Cluster-31803.69743	2338.35	0	Inf	2.37e-45	5073	552828061	XP_005847382.1	1286	7.3e-139	hypothetical protein CHLNCDRAFT_35526 [Chlorella variabilis]>gi|307107036|gb|EFN55280.1| hypothetical protein CHLNCDRAFT_35526 [Chlorella variabilis]			317	2.23e-162		K08568	CTSZ	cathepsin X	http://www.genome.jp/dbget-bin/www_bget?ko:K08568	Q9UBR2	858	4.4e-90	Cathepsin Z OS=Homo sapiens GN=CTSZ PE=1 SV=1	PF06426//PF16934//PF03051//PF00112	Serine acetyltransferase, N-terminal//Two-component Enterococcus faecalis cytolysin (EFC)//Peptidase C1-like family//Papain family cysteine protease	GO:0006534//GO:0050830//GO:0006508//GO:0042967//GO:0006535	cysteine metabolic process//defense response to Gram-positive bacterium//proteolysis//acyl-carrier-protein biosynthetic process//cysteine biosynthetic process from serine	GO:0009001//GO:0008234//GO:0004197	serine O-acetyltransferase activity//cysteine-type peptidase activity//cysteine-type endopeptidase activity	GO:0005737	cytoplasm	--	--
Cluster-31803.59519	0.35585	15495.6	-15.41	1.4e-44	2113	761973200	KIZ03487.1	563	2.1e-55	putative pyridoxamine 5'-phosphate oxidase [Monoraphidium neglectum]	--	--	--	--	--	--	--	--	--	--	--	--	--	PF01243//PF02988	Pyridoxamine 5'-phosphate oxidase//Phospholipase A2 inhibitor	GO:0055114//GO:0008615	oxidation-reduction process//pyridoxine biosynthetic process	GO:0004859//GO:0010181//GO:0004733	phospholipase inhibitor activity//FMN binding//pyridoxamine-phosphate oxidase activity	GO:0005576	extracellular region	--	--
Cluster-31803.91623	17.6787	3929.24	-7.7961	2.19e-41	3303	552826130	XP_005846961.1	732	8.3e-75	expressed protein [Chlorella variabilis]>gi|307106614|gb|EFN54859.1| expressed protein [Chlorella variabilis]	--	--	--	--	--	--	--	--	--	--	--	--	--	--	--	--	--	--	--	--	--	--	--
Cluster-31803.64601	4087.76	16.4964	7.953	1.38e-39	3086	552825715	XP_005846882.1	451	3e-42	hypothetical protein CHLNCDRAFT_12290, partial [Chlorella variabilis]>gi|307106535|gb|EFN54780.1| hypothetical protein CHLNCDRAFT_12290, partial [Chlorella variabilis]	--	--	--	--	--	K08360	CYB561	cytochrome b-561	http://www.genome.jp/dbget-bin/www_bget?ko:K08360	Q91577	190	7.7e-13	Cytochrome b561 OS=Xenopus laevis GN=cyb561 PE=2 SV=1	PF00642//PF00033//PF03188//PF01292	Zinc finger C-x8-C-x5-C-x3-H type (and similar)//Cytochrome b/b6/petB//Eukaryotic cytochrome b561//Prokaryotic cytochrome b561	GO:0022904//GO:0006118	respiratory electron transport chain//obsolete electron transport	GO:0046872//GO:0009055	metal ion binding//electron carrier activity	GO:0016020//GO:0016021	membrane//integral component of membrane	KOG1619	Cytochrome b
Cluster-31803.13104	12.6968	2883.03	-7.827	7.48e-39	5177	552837389	XP_005849350.1	1939	1.4e-214	expressed protein [Chlorella variabilis]>gi|307109009|gb|EFN57248.1| expressed protein [Chlorella variabilis]			308	2.29e-157		--	--	--	--	--	--	--	--	PF05637//PF05970//PF13851//PF17001//PF06331//PF12297	galactosyl transferase GMA12/MNN10 family//PIF1-like helicase//Growth-arrest specific micro-tubule binding//Type III secretion basal body protein I, YscI, HrpB, PscI//Transcription factor TFIIH complex subunit Tfb5//Ellis van Creveld protein 2 like protein	GO:0006289//GO:0009306//GO:0006281//GO:0000723//GO:0006355//GO:0007224//GO:0048870	nucleotide-excision repair//protein secretion//DNA repair//telomere maintenance//regulation of transcription, DNA-templated//smoothened signaling pathway//cell motility	GO:0003678//GO:0016757	DNA helicase activity//transferase activity, transferring glycosyl groups	GO:0016021//GO:0005657//GO:0000439//GO:0031514	integral component of membrane//replication fork//core TFIIH complex//motile cilium	--	--
Cluster-31803.26985	1537.17	0	Inf	3.41e-38	4963	760443381	XP_011398759.1	2773	2.3e-311	Soluble starch synthase 3, chloroplastic/amyloplastic [Auxenochlorella protothecoides]>gi|675353423|gb|KFM25863.1| Soluble starch synthase 3, chloroplastic/amyloplastic [Auxenochlorella protothecoides]			108	3.32e-46		--	--	--	--	Q43846	1856	8.1e-206	Soluble starch synthase 3, chloroplastic/amyloplastic OS=Solanum tuberosum GN=SS3 PE=1 SV=1	PF16760//PF03370	Starch/carbohydrate-binding module (family 53)//Carbohydrate/starch-binding module (family 21)	--	--	GO:0005515//GO:2001070	protein binding//starch binding	--	--	KOG3166	60S ribosomal protein L7A
Cluster-31803.72758	29.4896	4233.95	-7.1657	1.89e-37	4152	552842350	XP_005850540.1	1814	3.6e-200	hypothetical protein CHLNCDRAFT_19800, partial [Chlorella variabilis]>gi|307110202|gb|EFN58438.1| hypothetical protein CHLNCDRAFT_19800, partial [Chlorella variabilis]			471	0		K18059	SULTR4	sulfate transporter 4	http://www.genome.jp/dbget-bin/www_bget?ko:K18059	A8J6J0	1187	2.5e-128	Proton/sulfate cotransporter 2 OS=Chlamydomonas reinhardtii GN=SULTR2 PE=2 SV=1	PF01284//PF00916	Membrane-associating domain//Sulfate permease family	GO:0055085//GO:0008272	transmembrane transport//sulfate transport	GO:0015116//GO:0008271	sulfate transmembrane transporter activity//secondary active sulfate transmembrane transporter activity	GO:0016021//GO:0016020	integral component of membrane//membrane	--	--
Cluster-31803.61891	0	925.97	#NAME?	1.86e-34	1249	552832524	XP_005848364.1	414	2.3e-38	hypothetical protein CHLNCDRAFT_57674 [Chlorella variabilis]>gi|307108021|gb|EFN56262.1| hypothetical protein CHLNCDRAFT_57674 [Chlorella variabilis]			162	7.84e-77		--	--	--	--	Q9SFB0	135	7.4e-07	MATE efflux family protein FRD3 OS=Arabidopsis thaliana GN=FRD3 PE=1 SV=1	PF01554	MatE	GO:0006810//GO:0006855//GO:0055085//GO:0015893	transport//drug transmembrane transport//transmembrane transport//drug transport	GO:0015238//GO:0022857//GO:0015297	drug transmembrane transporter activity//transmembrane transporter activity//antiporter activity	GO:0016020	membrane	--	--
Cluster-31803.103201	106.917	8372.39	-6.2911	5.02e-34	2253	552841747	XP_005850391.1	817	7.9e-85	hypothetical protein CHLNCDRAFT_142269 [Chlorella variabilis]>gi|307110052|gb|EFN58289.1| hypothetical protein CHLNCDRAFT_142269 [Chlorella variabilis]	--	--	--	--	--	--	--	--	--	Q24940	409	2.3e-38	Cathepsin L-like proteinase OS=Fasciola hepatica GN=Cat-1 PE=1 SV=1	PF03051//PF00112	Peptidase C1-like family//Papain family cysteine protease	GO:0006508	proteolysis	GO:0004197//GO:0008234	cysteine-type endopeptidase activity//cysteine-type peptidase activity	--	--	KOG1543	Cysteine proteinase Cathepsin L
Cluster-31803.98106	50.1966	4788.31	-6.5758	5.02e-34	653	552826130	XP_005846961.1	378	1.8e-34	expressed protein [Chlorella variabilis]>gi|307106614|gb|EFN54859.1| expressed protein [Chlorella variabilis]	--	--	--	--	--	--	--	--	--	--	--	--	--	--	--	--	--	--	--	--	--	--	--
Cluster-31803.56566	7.21383	1659.8	-7.846	8.24e-34	2675	552823656	XP_005846409.1	214	7.8e-15	hypothetical protein CHLNCDRAFT_135502 [Chlorella variabilis]>gi|307106060|gb|EFN54307.1| hypothetical protein CHLNCDRAFT_135502 [Chlorella variabilis]	--	--	--	--	--	--	--	--	--	--	--	--	--	PF06403//PF03504	Lamprin//Chlamydia cysteine-rich outer membrane protein 6	--	--	GO:0005198//GO:0005201	structural molecule activity//extracellular matrix structural constituent	GO:0005578	proteinaceous extracellular matrix	--	--
Cluster-31803.29712	92.1143	7420.03	-6.3319	9.76e-34	3094	552824137	XP_005846530.1	696	1.2e-70	hypothetical protein CHLNCDRAFT_25013, partial [Chlorella variabilis]>gi|307106181|gb|EFN54428.1| hypothetical protein CHLNCDRAFT_25013, partial [Chlorella variabilis]	--	--	--	--	--	--	--	--	--	Q9P6J2	339	4.1e-30	Fe(2+)/Mn(2+) transporter pcl1 OS=Schizosaccharomyces pombe (strain 972 / ATCC 24843) GN=pcl1 PE=1 SV=1	--	--	--	--	--	--	--	--	--	--
Cluster-31803.103508	6.10755	1478.33	-7.9192	9.2e-33	1593	552810724	XP_005843280.1	337	2.5e-29	hypothetical protein CHLNCDRAFT_141322 [Chlorella variabilis]>gi|307102912|gb|EFN51178.1| hypothetical protein CHLNCDRAFT_141322 [Chlorella variabilis]	--	--	--	--	--	--	--	--	--	--	--	--	--	PF04014	Antidote-toxin recognition MazE, bacterial antitoxin	--	--	GO:0003677	DNA binding	--	--	--	--
Cluster-31803.55409	27.7563	2887.79	-6.701	3.17e-32	6194	760445821	XP_011399979.1	1268	1.1e-136	hypothetical protein F751_5855 [Auxenochlorella protothecoides]>gi|675354583|gb|KFM27023.1| hypothetical protein F751_5855 [Auxenochlorella protothecoides]	--	--	--	--	--	--	--	--	--	--	--	--	--	PF03938//PF10152//PF00892//PF01025//PF10486//PF00287	Outer membrane protein (OmpH-like)//Predicted coiled-coil domain-containing protein (DUF2360)//EamA-like transporter family//GrpE//Phosphoinositide 3-kinase gamma adapter protein p101 subunit//Sodium / potassium ATPase beta chain	GO:0006814//GO:0006813//GO:0006457	sodium ion transport//potassium ion transport//protein folding	GO:0051087//GO:0000774//GO:0051082//GO:0046935//GO:0042803	chaperone binding//adenyl-nucleotide exchange factor activity//unfolded protein binding//1-phosphatidylinositol-3-kinase regulator activity//protein homodimerization activity	GO:0005944//GO:0005890//GO:0071203//GO:0016021//GO:0016020	phosphatidylinositol 3-kinase complex, class IB//sodium:potassium-exchanging ATPase complex//WASH complex//integral component of membrane//membrane	--	--
Cluster-31803.41282	2.1932	13903	-12.63	6.93e-32	2941	552828054	XP_005847380.1	777	4.5e-80	hypothetical protein CHLNCDRAFT_35524 [Chlorella variabilis]>gi|307107034|gb|EFN55278.1| hypothetical protein CHLNCDRAFT_35524 [Chlorella variabilis]			302	2.8e-154		K00640	cysE	serine O-acetyltransferase	http://www.genome.jp/dbget-bin/www_bget?ko:K00640	Q42538	541	1.5e-53	Serine acetyltransferase 5 OS=Arabidopsis thaliana GN=SAT5 PE=1 SV=1	PF06426//PF16934	Serine acetyltransferase, N-terminal//Two-component Enterococcus faecalis cytolysin (EFC)	GO:0006534//GO:0042967//GO:0050830//GO:0006535	cysteine metabolic process//acyl-carrier-protein biosynthetic process//defense response to Gram-positive bacterium//cysteine biosynthetic process from serine	GO:0009001//GO:0016740	serine O-acetyltransferase activity//transferase activity	GO:0005737	cytoplasm	--	--
Cluster-31803.54839	6.57959	5285.9	-9.6499	7.67e-32	3110	552809593	XP_005842977.1	854	5.6e-89	hypothetical protein CHLNCDRAFT_33289 [Chlorella variabilis]>gi|307102605|gb|EFN50875.1| hypothetical protein CHLNCDRAFT_33289 [Chlorella variabilis]			353	0		K00616	E2.2.1.2, talA, talB	transaldolase	http://www.genome.jp/dbget-bin/www_bget?ko:K00616	B5EUF3	555	3.7e-55	Transaldolase OS=Vibrio fischeri (strain MJ11) GN=tal PE=3 SV=1	PF00149//PF11722//PF00923	Calcineurin-like phosphoesterase//CCCH zinc finger in TRM13 protein//Transaldolase	GO:0005975//GO:0006098	carbohydrate metabolic process//pentose-phosphate shunt	GO:0004801//GO:0008168//GO:0016787	sedoheptulose-7-phosphate:D-glyceraldehyde-3-phosphate glyceronetransferase activity//methyltransferase activity//hydrolase activity	GO:0005737	cytoplasm	KOG2772	Transaldolase
Cluster-31803.71703	0	788.176	#NAME?	7.88e-32	3311	552848992	XP_005852239.1	1640	4.3e-180	hypothetical protein CHLNCDRAFT_56592 [Chlorella variabilis]>gi|307111903|gb|EFN60137.1| hypothetical protein CHLNCDRAFT_56592 [Chlorella variabilis]			173	1.62e-82		K03320	amt, AMT, MEP	ammonium transporter, Amt family	http://www.genome.jp/dbget-bin/www_bget?ko:K03320	Q9FVN0	803	6.8e-84	Ammonium transporter 1 member 3 OS=Solanum lycopersicum GN=AMT1-3 PE=2 SV=1	PF01016//PF04931//PF15177//PF05297//PF15352//PF00909	Ribosomal L27 protein//DNA polymerase phi//Interleukin-28A//Herpesvirus latent membrane protein 1 (LMP1)//Susceptibility to monomelic amyotrophy//Ammonium Transporter Family	GO:0051607//GO:0031122//GO:0019087//GO:0007259//GO:0006351//GO:0050778//GO:0015696//GO:0007052//GO:0006260//GO:0035058//GO:0006412//GO:0007165//GO:0042254	defense response to virus//cytoplasmic microtubule organization//transformation of host cell by virus//JAK-STAT cascade//transcription, DNA-templated//positive regulation of immune response//ammonium transport//mitotic spindle organization//DNA replication//nonmotile primary cilium assembly//translation//signal transduction//ribosome biogenesis	GO:0003735//GO:0008519//GO:0003887//GO:0005125//GO:0003677	structural constituent of ribosome//ammonium transmembrane transporter activity//DNA-directed DNA polymerase activity//cytokine activity//DNA binding	GO:0042575//GO:0016020//GO:0016021//GO:0097546//GO:0005622//GO:0005840//GO:0005813	DNA polymerase complex//membrane//integral component of membrane//ciliary base//intracellular//ribosome//centrosome	KOG3154	Uncharacterized conserved protein
Cluster-31803.91628	0.7117	849.855	-10.222	5.58e-31	3716	552826130	XP_005846961.1	732	9.3e-75	expressed protein [Chlorella variabilis]>gi|307106614|gb|EFN54859.1| expressed protein [Chlorella variabilis]	--	--	--	--	--	--	--	--	--	--	--	--	--	--	--	--	--	--	--	--	--	--	--
Cluster-31803.38133	28.8263	2616.13	-6.5039	9.83e-31	2438	552828382	XP_005847471.1	240	6.9e-18	hypothetical protein CHLNCDRAFT_134417 [Chlorella variabilis]>gi|307107125|gb|EFN55369.1| hypothetical protein CHLNCDRAFT_134417 [Chlorella variabilis]	--	--	--	--	--	--	--	--	--	--	--	--	--	PF06112	Gammaherpesvirus capsid protein	--	--	--	--	GO:0019028	viral capsid	--	--
Cluster-31803.31288	372.742	18966.6	-5.6691	2.13e-30	2246	552814781	XP_005844275.1	1760	3.5e-194	hypothetical protein CHLNCDRAFT_59016 [Chlorella variabilis]>gi|307103916|gb|EFN52173.1| hypothetical protein CHLNCDRAFT_59016 [Chlorella variabilis]			244	3.72e-122		--	--	--	--	--	--	--	--	PF01501	Glycosyl transferase family 8	--	--	GO:0016757	transferase activity, transferring glycosyl groups	--	--	--	--
Cluster-31803.35821	0	711.96	#NAME?	5.79e-30	2892	633911545	KDD75785.1	1233	5.9e-133	hypothetical protein H632_c500p0, partial [Helicosporidium sp. ATCC 50920]			341	5.75e-176		K15628	PXA	ATP-binding cassette, subfamily D (ALD), peroxisomal long-chain fatty acid import protein	http://www.genome.jp/dbget-bin/www_bget?ko:K15628	P55096	593	1.3e-59	ATP-binding cassette sub-family D member 3 OS=Mus musculus GN=Abcd3 PE=1 SV=2	PF13304//PF06472//PF03193//PF00005//PF01637	AAA domain, putative AbiEii toxin, Type IV TA system//ABC transporter transmembrane region 2//Protein of unknown function, DUF258//ABC transporter//Archaeal ATPase	GO:0006810//GO:0055085	transport//transmembrane transport	GO:0005524//GO:0005525//GO:0016887//GO:0042626//GO:0003924	ATP binding//GTP binding//ATPase activity//ATPase activity, coupled to transmembrane movement of substances//GTPase activity	GO:0016021	integral component of membrane	KOG0060	Long-chain acyl-CoA transporter, ABC superfamily (involved in peroxisome organization and biogenesis)
Cluster-31803.93422	912.68	0	Inf	1.5e-29	8330	552844208	XP_005851038.1	600	4.2e-59	hypothetical protein CHLNCDRAFT_140918 [Chlorella variabilis]>gi|307110700|gb|EFN58936.1| hypothetical protein CHLNCDRAFT_140918 [Chlorella variabilis]			57	1.25e-17		K14310	NUP205, NUP192	nuclear pore complex protein Nup205	http://www.genome.jp/dbget-bin/www_bget?ko:K14310	F4KBW6	249	3e-19	Nuclear pore complex protein NUP205 OS=Arabidopsis thaliana GN=NUP205 PE=1 SV=1	PF00023//PF13606//PF11894//PF09606	Ankyrin repeat//Ankyrin repeat//Nuclear pore complex scaffold, nucleoporins 186/192/205//ARC105 or Med15 subunit of Mediator complex non-fungal	GO:0006357	regulation of transcription from RNA polymerase II promoter	GO:0005515//GO:0001104	protein binding//RNA polymerase II transcription cofactor activity	GO:0005643//GO:0016592	nuclear pore//mediator complex	--	--
Cluster-31803.57078	1146.76	2.35663	8.9266	2.01e-29	2434	302836153	XP_002949637.1	1356	2.7e-147	hypothetical protein VOLCADRAFT_59582 [Volvox carteri f. nagariensis]>gi|300264996|gb|EFJ49189.1| hypothetical protein VOLCADRAFT_59582 [Volvox carteri f. nagariensis]			467	0		K10844	ERCC2, XPD	DNA excision repair protein ERCC-2	http://www.genome.jp/dbget-bin/www_bget?ko:K10844	Q8W4M7	1224	7.6e-133	DNA repair helicase UVH6 OS=Arabidopsis thaliana GN=UVH6 PE=1 SV=1	PF13307//PF08534	Helicase C-terminal domain//Redoxin	GO:0006139//GO:0006289	nucleobase-containing compound metabolic process//nucleotide-excision repair	GO:0003677//GO:0005524//GO:0008026//GO:0016491//GO:0004003//GO:0003676//GO:0016818	DNA binding//ATP binding//ATP-dependent helicase activity//oxidoreductase activity//ATP-dependent DNA helicase activity//nucleic acid binding//hydrolase activity, acting on acid anhydrides, in phosphorus-containing anhydrides	GO:0005657//GO:0005634	replication fork//nucleus	KOG1131	RNA polymerase II transcription initiation/nucleotide excision repair factor TFIIH, 5'-3' helicase subunit RAD3
Cluster-31803.64486	6.93544	2256.49	-8.3459	5.73e-29	2662	552823656	XP_005846409.1	214	7.8e-15	hypothetical protein CHLNCDRAFT_135502 [Chlorella variabilis]>gi|307106060|gb|EFN54307.1| hypothetical protein CHLNCDRAFT_135502 [Chlorella variabilis]	--	--	--	--	--	--	--	--	--	--	--	--	--	PF03504//PF06403	Chlamydia cysteine-rich outer membrane protein 6//Lamprin	--	--	GO:0005198//GO:0005201	structural molecule activity//extracellular matrix structural constituent	GO:0005578	proteinaceous extracellular matrix	--	--
Cluster-31803.76631	5.48299	1137.45	-7.6966	5.73e-29	1509	552835019	XP_005848881.1	577	3.6e-57	hypothetical protein CHLNCDRAFT_144263 [Chlorella variabilis]>gi|307108539|gb|EFN56779.1| hypothetical protein CHLNCDRAFT_144263 [Chlorella variabilis]	--	--	--	--	--	--	--	--	--	--	--	--	--	PF01920//PF04977//PF07851//PF08702//PF07926	Prefoldin subunit//Septum formation initiator//TMPIT-like protein//Fibrinogen alpha/beta chain family//TPR/MLP1/MLP2-like protein	GO:0051258//GO:0006606//GO:0006457//GO:0007049//GO:0007165//GO:0030168	protein polymerization//protein import into nucleus//protein folding//cell cycle//signal transduction//platelet activation	GO:0051082//GO:0030674//GO:0005102	unfolded protein binding//protein binding, bridging//receptor binding	GO:0016021//GO:0016272//GO:0005577	integral component of membrane//prefoldin complex//fibrinogen complex	--	--
Cluster-31803.33333	826.412	0	Inf	6.22e-28	2712	552847974	XP_005851992.1	1333	1.4e-144	hypothetical protein CHLNCDRAFT_132901 [Chlorella variabilis]>gi|307111656|gb|EFN59890.1| hypothetical protein CHLNCDRAFT_132901 [Chlorella variabilis]	--	--	--	--	--	--	--	--	--	Q7TS68	448	8.2e-43	Putative methyltransferase NSUN6 OS=Mus musculus GN=Nsun6 PE=2 SV=2	PF08241//PF01472//PF01189//PF01728//PF01209	Methyltransferase domain//PUA domain//16S rRNA methyltransferase RsmF//FtsJ-like methyltransferase//ubiE/COQ5 methyltransferase family	GO:0008152//GO:0032259	metabolic process//methylation	GO:0003723//GO:0008168	RNA binding//methyltransferase activity	--	--	KOG1122	tRNA and rRNA cytosine-C5-methylase (nucleolar protein NOL1/NOP2)
Cluster-31803.91613	25.0838	2022.64	-6.3333	8.22e-28	3430	552826130	XP_005846961.1	683	4.1e-69	expressed protein [Chlorella variabilis]>gi|307106614|gb|EFN54859.1| expressed protein [Chlorella variabilis]	--	--	--	--	--	--	--	--	--	--	--	--	--	PF10462	Peptidase M66	--	--	GO:0004222	metalloendopeptidase activity	--	--	--	--
Cluster-31803.93441	784.327	0	Inf	4.29e-27	5971	552837835	XP_005849453.1	1874	5.7e-207	hypothetical protein CHLNCDRAFT_142716 [Chlorella variabilis]>gi|307109113|gb|EFN57351.1| hypothetical protein CHLNCDRAFT_142716 [Chlorella variabilis]			487	0		--	--	--	--	O14297	159	5.8e-09	Uncharacterized protein C9E9.15 OS=Schizosaccharomyces pombe (strain 972 / ATCC 24843) GN=SPAC9E9.15 PE=3 SV=2	PF00106//PF12678//PF00005//PF13639//PF01073//PF00503//PF17123//PF01370//PF14634//PF12861//PF03425//PF00097	short chain dehydrogenase//RING-H2 zinc finger//ABC transporter//Ring finger domain//3-beta hydroxysteroid dehydrogenase/isomerase family//G-protein alpha subunit//RING-like zinc finger//NAD dependent epimerase/dehydratase family//zinc-RING finger domain//Anaphase-promoting complex subunit 11 RING-H2 finger//Carbohydrate binding domain (family 11)//Zinc finger, C3HC4 type (RING finger)	GO:0008209//GO:0008207//GO:0008152//GO:0030245//GO:0016567//GO:0055114//GO:0007165//GO:0007186//GO:0005982//GO:0008210//GO:0006694//GO:0005985	androgen metabolic process//C21-steroid hormone metabolic process//metabolic process//cellulose catabolic process//protein ubiquitination//oxidation-reduction process//signal transduction//G-protein coupled receptor signaling pathway//starch metabolic process//estrogen metabolic process//steroid biosynthetic process//sucrose metabolic process	GO:0003854//GO:0050662//GO:0016887//GO:0004871//GO:0008810//GO:0046872//GO:0008270//GO:0005515//GO:0004842//GO:0031683//GO:0005524//GO:0003824//GO:0016491//GO:0016616//GO:0019001//GO:0003924	3-beta-hydroxy-delta5-steroid dehydrogenase activity//coenzyme binding//ATPase activity//signal transducer activity//cellulase activity//metal ion binding//zinc ion binding//protein binding//ubiquitin-protein transferase activity//G-protein beta/gamma-subunit complex binding//ATP binding//catalytic activity//oxidoreductase activity//oxidoreductase activity, acting on the CH-OH group of donors, NA…	GO:0005680	anaphase-promoting complex	KOG0320	Predicted E3 ubiquitin ligase
Cluster-31803.74852	782.035	0	Inf	4.72e-27	1419	552844946	XP_005851218.1	420	5.4e-39	hypothetical protein CHLNCDRAFT_137916 [Chlorella variabilis]>gi|307110881|gb|EFN59116.1| hypothetical protein CHLNCDRAFT_137916 [Chlorella variabilis]	--	--	--	--	--	--	--	--	--	--	--	--	--	PF03266	NTPase	GO:0007154	cell communication	GO:0035091//GO:0098519	phosphatidylinositol binding//nucleotide phosphatase activity, acting on free nucleotides	--	--	--	--
Cluster-31803.7979	9160.67	214.71	5.415	1.08e-26	5091	552828860	XP_005847566.1	5225	0	hypothetical protein CHLNCDRAFT_133810 [Chlorella variabilis]>gi|307107221|gb|EFN55464.1| hypothetical protein CHLNCDRAFT_133810 [Chlorella variabilis]			1236	0		--	--	--	--	A5H0J2	2534	2e-284	Urea amidolyase OS=Lachancea kluyveri GN=DUR1,2 PE=3 SV=1	PF02786//PF11722//PF08686//PF07478	Carbamoyl-phosphate synthase L chain, ATP binding domain//CCCH zinc finger in TRM13 protein//PLAC (protease and lacunin) domain//D-ala D-ala ligase C-terminus	GO:0000413//GO:0006457//GO:0009252//GO:0046436//GO:0006633	protein peptidyl-prolyl isomerization//protein folding//peptidoglycan biosynthetic process//D-alanine metabolic process//fatty acid biosynthetic process	GO:0046872//GO:0008716//GO:0004075//GO:0008233//GO:0003755//GO:0008168//GO:0005524	metal ion binding//D-alanine-D-alanine ligase activity//biotin carboxylase activity//peptidase activity//peptidyl-prolyl cis-trans isomerase activity//methyltransferase activity//ATP binding	GO:0009343	biotin carboxylase complex	KOG0238	3-Methylcrotonyl-CoA carboxylase, biotin-containing subunit/Propionyl-CoA carboxylase, alpha chain/Acetyl-CoA carboxylase, biotin carboxylase subunit
Cluster-31803.42011	13.5223	1375.18	-6.6681	2.2e-26	1705	552810004	XP_005843089.1	136	5.5e-06	hypothetical protein CHLNCDRAFT_59371 [Chlorella variabilis]>gi|307102718|gb|EFN50987.1| hypothetical protein CHLNCDRAFT_59371 [Chlorella variabilis]	--	--	--	--	--	--	--	--	--	--	--	--	--	--	--	--	--	--	--	--	--	--	--
Cluster-31803.11983	50.5622	9001.32	-7.4759	2.5e-25	2094	552812274	XP_005843669.1	339	2e-29	hypothetical protein CHLNCDRAFT_140052 [Chlorella variabilis]>gi|307103306|gb|EFN51567.1| hypothetical protein CHLNCDRAFT_140052 [Chlorella variabilis]	--	--	--	--	--	--	--	--	--	--	--	--	--	--	--	--	--	--	--	--	--	--	--
Cluster-31803.11309	2.1932	770.611	-8.4568	7.89e-25	1069	695069731	XP_009381860.1	204	4.5e-14	PREDICTED: keratin-associated protein 5-1-like [Musa acuminata subsp. malaccensis]	--	--	--	--	--	--	--	--	--	--	--	--	--	PF08046	IlvGEDA operon leader peptide	GO:0009082	branched-chain amino acid biosynthetic process	--	--	--	--	--	--
Cluster-31803.103284	12.6968	1194.89	-6.5563	7.91e-25	3925	552810604	XP_005843247.1	1337	6.9e-145	hypothetical protein CHLNCDRAFT_55316 [Chlorella variabilis]>gi|307102879|gb|EFN51145.1| hypothetical protein CHLNCDRAFT_55316 [Chlorella variabilis]			41	4.6e-09		--	--	--	--	O51055	322	4.8e-28	Uncharacterized protein BB_0024 OS=Borrelia burgdorferi (strain ATCC 35210 / B31 / CIP 102532 / DSM 4680) GN=BB_0024 PE=4 SV=1	PF07995	Glucose / Sorbosone dehydrogenase	GO:0005975	carbohydrate metabolic process	GO:0016901//GO:0048038	oxidoreductase activity, acting on the CH-OH group of donors, quinone or similar compound as acceptor//quinone binding	--	--	--	--
Cluster-31803.75774	2332.25	42.3049	5.7848	1.2e-24	2518	12831437	AAK02066.1	1169	1.3e-125	nitrate transporter NTR [Chlorella sorokiniana]			447	0		K02575	NRT, narK, nrtP, nasA	MFS transporter, NNP family, nitrate/nitrite transporter	http://www.genome.jp/dbget-bin/www_bget?ko:K02575	Q9FJH8	635	1.6e-64	High affinity nitrate transporter 2.4 OS=Arabidopsis thaliana GN=NRT2.4 PE=2 SV=1	PF08711//PF05470//PF07690	TFIIS helical bundle-like domain//Eukaryotic translation initiation factor 3 subunit 8 N-terminus//Major Facilitator Superfamily	GO:0006351//GO:0006413//GO:0006446//GO:0055085	transcription, DNA-templated//translational initiation//regulation of translational initiation//transmembrane transport	GO:0031369//GO:0003677//GO:0003743	translation initiation factor binding//DNA binding//translation initiation factor activity	GO:0005840//GO:0005852//GO:0005634//GO:0016021	ribosome//eukaryotic translation initiation factor 3 complex//nucleus//integral component of membrane	--	--
Cluster-31803.51354	0	502.818	#NAME?	2.53e-24	3422	301507726	ADK77883.1	1019	4.5e-108	hydrogenase [Chlorella sp. DT]			146	1.71e-67		--	--	--	--	Q46508	761	5.2e-79	NADP-reducing hydrogenase subunit HndC OS=Desulfovibrio fructosivorans GN=hndD PE=1 SV=1	--	--	--	--	--	--	--	--	--	--
Cluster-31803.32566	34.8733	1862.61	-5.7391	8.19e-24	3674	760442331	XP_011398234.1	283	1.1e-22	hypothetical protein F751_0879 [Auxenochlorella protothecoides]>gi|675352901|gb|KFM25341.1| hypothetical protein F751_0879 [Auxenochlorella protothecoides]	--	--	--	--	--	--	--	--	--	--	--	--	--	PF05053//PF03419//PF00335//PF00612//PF06160	Menin//Sporulation factor SpoIIGA//Tetraspanin family//IQ calmodulin-binding motif//Septation ring formation regulator, EzrA	GO:0000921//GO:0030436//GO:0006508	septin ring assembly//asexual sporulation//proteolysis	GO:0005515//GO:0004190	protein binding//aspartic-type endopeptidase activity	GO:0005634//GO:0016021//GO:0005940	nucleus//integral component of membrane//septin ring	--	--
Cluster-31803.71379	686.243	0.589159	10.186	8.43e-24	6568	552848855	XP_005852203.1	1175	7.1e-126	hypothetical protein CHLNCDRAFT_133427 [Chlorella variabilis]>gi|307111867|gb|EFN60101.1| hypothetical protein CHLNCDRAFT_133427 [Chlorella variabilis]			707	0		K14572	MDN1, REA1	midasin	http://www.genome.jp/dbget-bin/www_bget?ko:K14572	Q869L3	805	7.9e-84	Midasin OS=Dictyostelium discoideum GN=mdn1 PE=3 SV=2	PF03028//PF07726//PF00004//PF07728	Dynein heavy chain and region D6 of dynein motor//ATPase family associated with various cellular activities (AAA)//ATPase family associated with various cellular activities (AAA)//AAA domain (dynein-related subfamily)	GO:0007018//GO:0007017	microtubule-based movement//microtubule-based process	GO:0016887//GO:0005524//GO:0003777	ATPase activity//ATP binding//microtubule motor activity	GO:0030286//GO:0005874	dynein complex//microtubule	KOG1808	AAA ATPase containing von Willebrand factor type A (vWA) domain
Cluster-31803.66854	171.955	6811.8	-5.3079	1.38e-23	2714	552817063	XP_005844839.1	866	2e-90	hypothetical protein CHLNCDRAFT_138305 [Chlorella variabilis]>gi|307104484|gb|EFN52737.1| hypothetical protein CHLNCDRAFT_138305 [Chlorella variabilis]	--	--	--	--	--	--	--	--	--	--	--	--	--	PF04706//PF01562//PF04834//PF07465//PF05887	Dickkopf N-terminal cysteine-rich region//Reprolysin family propeptide//Early E3 14.5 kDa protein//Photosystem I protein M (PsaM)//Procyclic acidic repetitive protein (PARP)	GO:0006508//GO:0007275//GO:0009966//GO:0015979//GO:0030178	proteolysis//multicellular organismal development//regulation of signal transduction//photosynthesis//negative regulation of Wnt signaling pathway	GO:0004222//GO:0008270	metalloendopeptidase activity//zinc ion binding	GO:0005576//GO:0016020//GO:0016021	extracellular region//membrane//integral component of membrane	--	--
Cluster-31803.43585	79.6862	3101.88	-5.2827	2.02e-23	1431	552814686	XP_005844252.1	891	1.3e-93	hypothetical protein CHLNCDRAFT_58991 [Chlorella variabilis]>gi|307103893|gb|EFN52150.1| hypothetical protein CHLNCDRAFT_58991 [Chlorella variabilis]			335	6.09e-173		K02356	efp	elongation factor P	http://www.genome.jp/dbget-bin/www_bget?ko:K02356	Q2JP65	625	1.3e-63	Elongation factor P OS=Synechococcus sp. (strain JA-2-3B'a(2-13)) GN=efp PE=3 SV=1	PF01132//PF09285	Elongation factor P (EF-P) OB domain//Elongation factor P, C-terminal	GO:0048268//GO:0043043//GO:0006448//GO:0009099//GO:0009082//GO:0009098//GO:0009097//GO:0006414//GO:0015940	clathrin coat assembly//peptide biosynthetic process//regulation of translational elongation//valine biosynthetic process//branched-chain amino acid biosynthetic process//leucine biosynthetic process//isoleucine biosynthetic process//translational elongation//pantothenate biosynthetic process	GO:0030276//GO:0004160//GO:0003746//GO:0005545	clathrin binding//dihydroxy-acid dehydratase activity//translation elongation factor activity//1-phosphatidylinositol binding	GO:0030118//GO:0005840//GO:0005737	clathrin coat//ribosome//cytoplasm	--	--
Cluster-31803.57099	617.545	0	Inf	2.05e-23	7557	552822930	XP_005846229.1	823	5.3e-85	hypothetical protein CHLNCDRAFT_31689 [Chlorella variabilis]>gi|307105880|gb|EFN54127.1| hypothetical protein CHLNCDRAFT_31689 [Chlorella variabilis]			205	6.06e-100		--	--	--	--	Q8H1Q1	493	1.4e-47	Thylakoid lumenal protein At1g12250, chloroplastic OS=Arabidopsis thaliana GN=At1g12250 PE=1 SV=1	PF00018//PF03504	SH3 domain//Chlamydia cysteine-rich outer membrane protein 6	--	--	GO:0005201//GO:0005515	extracellular matrix structural constituent//protein binding	GO:0005578	proteinaceous extracellular matrix	--	--
Cluster-31803.96508	40.8768	1986.98	-5.6032	3.98e-23	3104	552826130	XP_005846961.1	683	3.8e-69	expressed protein [Chlorella variabilis]>gi|307106614|gb|EFN54859.1| expressed protein [Chlorella variabilis]	--	--	--	--	--	--	--	--	--	--	--	--	--	PF10462	Peptidase M66	--	--	GO:0004222	metalloendopeptidase activity	--	--	--	--
Cluster-31803.104179	4879.9	142.647	5.0963	6.52e-23	1025	12831437	AAK02066.1	743	1.4e-76	nitrate transporter NTR [Chlorella sorokiniana]			326	4.35e-168		K02575	NRT, narK, nrtP, nasA	MFS transporter, NNP family, nitrate/nitrite transporter	http://www.genome.jp/dbget-bin/www_bget?ko:K02575	P0DKG9	461	9.6e-45	High-affinity nitrate transporter 2.1 OS=Oryza sativa subsp. japonica GN=NRT2.1 PE=1 SV=1	PF07690	Major Facilitator Superfamily	GO:0055085	transmembrane transport	--	--	GO:0016021	integral component of membrane	--	--
Cluster-31803.75977	683.946	1.17832	9.181	7.93e-23	2372	552832959	XP_005848449.1	1023	1.1e-108	hypothetical protein CHLNCDRAFT_35084 [Chlorella variabilis]>gi|307108106|gb|EFN56347.1| hypothetical protein CHLNCDRAFT_35084 [Chlorella variabilis]			385	0		K01939	purA, ADSS	adenylosuccinate synthase	http://www.genome.jp/dbget-bin/www_bget?ko:K01939	Q017T9	819	6.8e-86	Adenylosuccinate synthetase, chloroplastic OS=Ostreococcus tauri GN=PURA PE=3 SV=1	PF04736//PF07945//PF00709	Eclosion hormone//Janus-atracotoxin//Adenylosuccinate synthetase	GO:0006164//GO:0007218//GO:0006522//GO:0018990//GO:0006144//GO:0009405//GO:0044208//GO:0006531	purine nucleotide biosynthetic process//neuropeptide signaling pathway//alanine metabolic process//ecdysis, chitin-based cuticle//purine nucleobase metabolic process//pathogenesis//'de novo' AMP biosynthetic process//aspartate metabolic process	GO:0008255//GO:0004019//GO:0005525//GO:0000287	ecdysis-triggering hormone activity//adenylosuccinate synthase activity//GTP binding//magnesium ion binding	GO:0009507//GO:0005576	chloroplast//extracellular region	KOG1355	Adenylosuccinate synthase
Cluster-31803.67472	2729.28	76.1221	5.1641	9.56e-23	1790	760446091	XP_011400114.1	1945	9.9e-216	6-phosphogluconate dehydrogenase, decarboxylating [Auxenochlorella protothecoides]>gi|675354707|gb|KFM27147.1| 6-phosphogluconate dehydrogenase, decarboxylating [Auxenochlorella protothecoides]			362	0		K00033	PGD, gnd, gntZ	6-phosphogluconate dehydrogenase	http://www.genome.jp/dbget-bin/www_bget?ko:K00033	Q94KU2	1707	5.5e-189	6-phosphogluconate dehydrogenase, decarboxylating 2, chloroplastic OS=Spinacia oleracea GN=pgdP PE=1 SV=1	PF03446//PF02737//PF02826//PF00393	NAD binding domain of 6-phosphogluconate dehydrogenase//3-hydroxyacyl-CoA dehydrogenase, NAD binding domain//D-isomer specific 2-hydroxyacid dehydrogenase, NAD binding domain//6-phosphogluconate dehydrogenase, C-terminal domain	GO:0018874//GO:0006550//GO:0006098//GO:0055114//GO:0006554//GO:0006574//GO:0006631//GO:0006633//GO:0006568//GO:0006552//GO:0019521	benzoate metabolic process//isoleucine catabolic process//pentose-phosphate shunt//oxidation-reduction process//lysine catabolic process//valine catabolic process//fatty acid metabolic process//fatty acid biosynthetic process//tryptophan metabolic process//leucine catabolic process//D-gluconate metabolic process	GO:0004616//GO:0003857//GO:0051287//GO:0050661//GO:0016491	phosphogluconate dehydrogenase (decarboxylating) activity//3-hydroxyacyl-CoA dehydrogenase activity//NAD binding//NADP binding//oxidoreductase activity	--	--	KOG2653	6-phosphogluconate dehydrogenase
Cluster-31803.16419	195.647	5895.78	-4.9134	1.07e-22	1632	545369347	XP_005649423.1	844	4.2e-88	hypothetical protein COCSUDRAFT_14223 [Coccomyxa subellipsoidea C-169]>gi|384251401|gb|EIE24879.1| hypothetical protein COCSUDRAFT_14223 [Coccomyxa subellipsoidea C-169]	--	--	--	--	--	K07752	CPD	carboxypeptidase D	http://www.genome.jp/dbget-bin/www_bget?ko:K07752	Q9JHW1	592	9.8e-60	Carboxypeptidase D OS=Rattus norvegicus GN=Cpd PE=2 SV=2	PF00246	Zinc carboxypeptidase	GO:0006508	proteolysis	GO:0008270//GO:0004181	zinc ion binding//metallocarboxypeptidase activity	--	--	KOG2649	Zinc carboxypeptidase
Cluster-31803.27087	0	452.361	#NAME?	1.14e-22	1380	552838458	XP_005849582.1	399	1.4e-36	hypothetical protein CHLNCDRAFT_20868, partial [Chlorella variabilis]>gi|307109242|gb|EFN57480.1| hypothetical protein CHLNCDRAFT_20868, partial [Chlorella variabilis]	--	--	--	--	--	K03671	trxA	thioredoxin 1	http://www.genome.jp/dbget-bin/www_bget?ko:K03671	P22803	189	4.5e-13	Thioredoxin-2 OS=Saccharomyces cerevisiae (strain ATCC 204508 / S288c) GN=TRX2 PE=1 SV=3	PF00578//PF00085//PF00462	AhpC/TSA family//Thioredoxin//Glutaredoxin	GO:0055114//GO:0006118//GO:0045454//GO:0006662	oxidation-reduction process//obsolete electron transport//cell redox homeostasis//glycerol ether metabolic process	GO:0009055//GO:0016209//GO:0015035//GO:0016491	electron carrier activity//antioxidant activity//protein disulfide oxidoreductase activity//oxidoreductase activity	--	--	--	--
Cluster-31803.64605	631.43	0.589159	10.066	1.4e-22	3359	552825715	XP_005846882.1	426	2.6e-39	hypothetical protein CHLNCDRAFT_12290, partial [Chlorella variabilis]>gi|307106535|gb|EFN54780.1| hypothetical protein CHLNCDRAFT_12290, partial [Chlorella variabilis]	--	--	--	--	--	--	--	--	--	Q91577	174	6e-11	Cytochrome b561 OS=Xenopus laevis GN=cyb561 PE=2 SV=1	PF01292//PF03188//PF00033//PF03153	Prokaryotic cytochrome b561//Eukaryotic cytochrome b561//Cytochrome b/b6/petB//Transcription factor IIA, alpha/beta subunit	GO:0022904//GO:0006118//GO:0006367	respiratory electron transport chain//obsolete electron transport//transcription initiation from RNA polymerase II promoter	GO:0009055	electron carrier activity	GO:0005672//GO:0016020//GO:0016021	transcription factor TFIIA complex//membrane//integral component of membrane	KOG1619	Cytochrome b
Cluster-31803.103451	10.0316	969.908	-6.5952	1.5e-22	626	552840784	XP_005850140.1	397	1.1e-36	hypothetical protein CHLNCDRAFT_34430 [Chlorella variabilis]>gi|307109801|gb|EFN58038.1| hypothetical protein CHLNCDRAFT_34430 [Chlorella variabilis]	--	--	--	--	--	K09500	CCT8	T-complex protein 1 subunit theta	http://www.genome.jp/dbget-bin/www_bget?ko:K09500	Q94K05	297	6.1e-26	T-complex protein 1 subunit theta OS=Arabidopsis thaliana GN=CCT8 PE=1 SV=1	PF00118	TCP-1/cpn60 chaperonin family	GO:0006457	protein folding	GO:0005524//GO:0051082	ATP binding//unfolded protein binding	GO:0005737	cytoplasm	KOG0362	Chaperonin complex component, TCP-1 theta subunit (CCT8)
Cluster-31803.60833	322.204	8906.4	-4.7888	1.73e-22	2698	552831062	XP_005848045.1	686	1.5e-69	hypothetical protein CHLNCDRAFT_35254 [Chlorella variabilis]>gi|307107701|gb|EFN55943.1| hypothetical protein CHLNCDRAFT_35254 [Chlorella variabilis]			60	8.64e-20		--	--	--	--	Q93ZN2	493	4.9e-48	Probable aldo-keto reductase 4 OS=Arabidopsis thaliana GN=At1g60710 PE=2 SV=1	PF06085	Lipoprotein Rz1 precursor	GO:0019064	fusion of virus membrane with host plasma membrane	--	--	GO:0019867	outer membrane	KOG1575	Voltage-gated shaker-like K+ channel, subunit beta/KCNAB
Cluster-31803.93161	47.6839	2348.02	-5.6218	2.92e-22	2502	552818100	XP_005845114.1	173	4.2e-10	hypothetical protein CHLNCDRAFT_58716 [Chlorella variabilis]>gi|307104760|gb|EFN53012.1| hypothetical protein CHLNCDRAFT_58716 [Chlorella variabilis]	--	--	--	--	--	--	--	--	--	--	--	--	--	--	--	--	--	--	--	--	--	--	--
Cluster-31803.110281	557.08	0	Inf	6.56e-22	1343	552822809	XP_005846209.1	258	3.1e-20	hypothetical protein CHLNCDRAFT_25301, partial [Chlorella variabilis]>gi|307105859|gb|EFN54107.1| hypothetical protein CHLNCDRAFT_25301, partial [Chlorella variabilis]	--	--	--	--	--	--	--	--	--	O05399	188	5.7e-13	Uncharacterized transporter YrhG OS=Bacillus subtilis (strain 168) GN=yrhG PE=3 SV=1	PF01226	Formate/nitrite transporter	GO:0006810	transport	GO:0005215	transporter activity	GO:0016020	membrane	--	--
Cluster-31803.93198	803.996	6.78061	6.8896	3.69e-21	1847	552828867	XP_005847568.1	1434	1.8e-156	hypothetical protein CHLNCDRAFT_57824 [Chlorella variabilis]>gi|307107223|gb|EFN55466.1| hypothetical protein CHLNCDRAFT_57824 [Chlorella variabilis]			56	9.83e-18		--	--	--	--	Q936X2	432	4e-41	Allophanate hydrolase OS=Pseudomonas sp. (strain ADP) GN=atzF PE=1 SV=1	--	--	--	--	--	--	--	--	KOG1211	Amidases
Cluster-31803.33350	1784.1	0	Inf	3.7e-21	5830	552826487	XP_005847035.1	3679	0	hypothetical protein CHLNCDRAFT_134668 [Chlorella variabilis]>gi|307106688|gb|EFN54933.1| hypothetical protein CHLNCDRAFT_134668 [Chlorella variabilis]			1607	0		K15436	TRPO3, MTR10	transportin-3	http://www.genome.jp/dbget-bin/www_bget?ko:K15436	Q9Y5L0	384	4.6e-35	Transportin-3 OS=Homo sapiens GN=TNPO3 PE=1 SV=3	PF03810	Importin-beta N-terminal domain	GO:0006886	intracellular protein transport	GO:0008536	Ran GTPase binding	--	--	KOG2081	Nuclear transport regulator
Cluster-31803.89202	525.61	0	Inf	4.65e-21	5491	552840578	XP_005850083.1	2553	9.6e-286	hypothetical protein CHLNCDRAFT_142135 [Chlorella variabilis]>gi|307109744|gb|EFN57981.1| hypothetical protein CHLNCDRAFT_142135 [Chlorella variabilis]			537	0		K14311	NUP188	nuclear pore complex protein Nup188	http://www.genome.jp/dbget-bin/www_bget?ko:K14311	--	--	--	--	PF11894//PF00739	Nuclear pore complex scaffold, nucleoporins 186/192/205//Trans-activation protein X	GO:0019079	viral genome replication	--	--	GO:0005643	nuclear pore	--	--
Cluster-31803.50042	0	959.803	#NAME?	4.76e-21	3208	552842683	XP_005850634.1	430	8.4e-40	hypothetical protein CHLNCDRAFT_20098 [Chlorella variabilis]>gi|307110296|gb|EFN58532.1| hypothetical protein CHLNCDRAFT_20098 [Chlorella variabilis]	--	--	--	--	--	K15777	DOPA	4,5-DOPA dioxygenase extradiol	http://www.genome.jp/dbget-bin/www_bget?ko:K15777	B6F0W8	224	9.1e-17	4,5-DOPA dioxygenase extradiol OS=Mirabilis jalapa GN=DOD PE=1 SV=1	PF02900//PF13994	Catalytic LigB subunit of aromatic ring-opening dioxygenase//PgaD-like protein	GO:0008152//GO:0006725//GO:0042710	metabolic process//cellular aromatic compound metabolic process//biofilm formation	GO:0016491//GO:0008198//GO:0043169	oxidoreductase activity//ferrous iron binding//cation binding	--	--	--	--
Cluster-31803.7313	522.482	0	Inf	5.53e-21	3058	545359209	XP_005645091.1	1835	9.7e-203	urea active transporter-like protein [Coccomyxa subellipsoidea C-169]>gi|384247059|gb|EIE20547.1| urea active transporter-like protein [Coccomyxa subellipsoidea C-169]			756	0		--	--	--	--	F4KD71	1721	2.2e-190	Urea-proton symporter DUR3 OS=Arabidopsis thaliana GN=DUR3 PE=1 SV=1	PF00474	Sodium:solute symporter family	GO:0055085//GO:0006810	transmembrane transport//transport	GO:0005215	transporter activity	GO:0016020	membrane	KOG2348	Urea transporter
Cluster-31803.103912	40.8477	1639.93	-5.3272	7.38e-21	3053	--	--	--	--	--	--	--	--	--	--	--	--	--	--	--	--	--	--	PF06009//PF05531//PF10392//PF04513	Laminin Domain II//Nucleopolyhedrovirus P10 protein//Golgi transport complex subunit 5//Baculovirus polyhedron envelope protein, PEP, C terminus	GO:0007155//GO:0006891	cell adhesion//intra-Golgi vesicle-mediated transport	GO:0005198	structural molecule activity	GO:0019031//GO:0017119//GO:0019028	viral envelope//Golgi transport complex//viral capsid	--	--
Cluster-31803.32267	594.945	1.17832	8.9799	8.28e-21	3500	552809147	XP_005842872.1	1194	2.4e-128	hypothetical protein CHLNCDRAFT_142486 [Chlorella variabilis]>gi|307102487|gb|EFN50760.1| hypothetical protein CHLNCDRAFT_142486 [Chlorella variabilis]			44	8.81e-11		--	--	--	--	Q7SXW3	135	2.1e-06	Leucine-rich repeat-containing protein 40 OS=Danio rerio GN=lrrc40 PE=2 SV=1	PF12937//PF13855//PF00856//PF00646//PF00560	F-box-like//Leucine rich repeat//SET domain//F-box domain//Leucine Rich Repeat	--	--	GO:0005515	protein binding	--	--	--	--
Cluster-31803.53003	0.35585	430.401	-10.24	1.63e-20	1610	527209922	EPS74531.1	243	2e-18	hypothetical protein M569_00248, partial [Genlisea aurea]			1327	0		--	--	--	--	Q3BAI2	202	1.6e-14	Uncharacterized protein ORF91 OS=Phalaenopsis aphrodite subsp. formosana PE=4 SV=1	--	--	--	--	--	--	--	--	--	--
Cluster-31803.65639	504.409	0	Inf	1.74e-20	6725	552823891	XP_005846472.1	1044	1.1e-110	hypothetical protein CHLNCDRAFT_135657 [Chlorella variabilis]>gi|307106123|gb|EFN54370.1| hypothetical protein CHLNCDRAFT_135657 [Chlorella variabilis]			154	1.21e-71		--	--	--	--	--	--	--	--	PF02038//PF00418//PF13506//PF06003//PF01698	ATP1G1/PLM/MAT8 family//Tau and MAP protein, tubulin-binding repeat//Glycosyl transferase family 21//Survival motor neuron protein (SMN)//Floricaula / Leafy protein	GO:0006811//GO:0006397//GO:0006355	ion transport//mRNA processing//regulation of transcription, DNA-templated	GO:0005216//GO:0003677//GO:0003723//GO:0015631//GO:0016757	ion channel activity//DNA binding//RNA binding//tubulin binding//transferase activity, transferring glycosyl groups	GO:0045298//GO:0005737//GO:0016020//GO:0005634	tubulin complex//cytoplasm//membrane//nucleus	--	--
Cluster-31803.22175	4.36703	693.662	-7.3114	2.13e-20	1965	552820571	XP_005845632.1	925	2.1e-97	hypothetical protein CHLNCDRAFT_136632 [Chlorella variabilis]>gi|307105280|gb|EFN53530.1| hypothetical protein CHLNCDRAFT_136632 [Chlorella variabilis]	--	--	--	--	--	--	--	--	--	--	--	--	--	PF04434	SWIM zinc finger	--	--	GO:0008270	zinc ion binding	--	--	--	--
Cluster-31803.30375	61.901	2057.79	-5.055	3.64e-20	1534	--	--	--	--	--	--	--	--	--	--	--	--	--	--	--	--	--	--	--	--	--	--	--	--	--	--	--	--
Cluster-31803.104586	10.2349	787.651	-6.266	5.02e-20	1120	--	--	--	--	--	--	--	--	--	--	--	--	--	--	--	--	--	--	PF04625	DEC-1 protein, N-terminal region	GO:0007304	chorion-containing eggshell formation	GO:0005213	structural constituent of chorion	GO:0005576//GO:0042600	extracellular region//chorion	--	--
Cluster-31803.95897	485.404	0	Inf	6.03e-20	5328	552844687	XP_005851147.1	3570	0	hypothetical protein CHLNCDRAFT_56692 [Chlorella variabilis]>gi|307110810|gb|EFN59045.1| hypothetical protein CHLNCDRAFT_56692 [Chlorella variabilis]			601	0		--	--	--	--	A8IJF8	1307	4e-142	Sodium/sulfate cotransporter 1 OS=Chlamydomonas reinhardtii GN=SLT1 PE=2 SV=1	PF02080//PF03600	TrkA-C domain//Citrate transporter	GO:0055085//GO:0006812//GO:0006813	transmembrane transport//cation transport//potassium ion transport	GO:0008324	cation transmembrane transporter activity	GO:0016021	integral component of membrane	--	--
Cluster-31803.17814	45.2147	1623.3	-5.166	6.83e-20	866	552847696	XP_005851926.1	407	1.1e-37	hypothetical protein CHLNCDRAFT_59546 [Chlorella variabilis]>gi|307111590|gb|EFN59824.1| hypothetical protein CHLNCDRAFT_59546 [Chlorella variabilis]	--	--	--	--	--	--	--	--	--	P20507	157	1.4e-09	Carbonic anhydrase 1 OS=Chlamydomonas reinhardtii GN=CAH1 PE=1 SV=1	--	--	--	--	--	--	--	--	--	--
Cluster-31803.38159	7356.03	300.98	4.6112	6.86e-20	965	--	--	--	--	--	--	--	--	--	--	--	--	--	--	--	--	--	--	PF03153	Transcription factor IIA, alpha/beta subunit	GO:0006367	transcription initiation from RNA polymerase II promoter	--	--	GO:0005672	transcription factor TFIIA complex	--	--
Cluster-31803.54250	0	375.721	#NAME?	8.04e-20	5568	552818604	XP_005845232.1	685	3.9e-69	hypothetical protein CHLNCDRAFT_137495 [Chlorella variabilis]>gi|307104878|gb|EFN53130.1| hypothetical protein CHLNCDRAFT_137495 [Chlorella variabilis]	--	--	--	--	--	--	--	--	--	Q6Z6L4	318	2e-27	Aminopeptidase M1-A OS=Oryza sativa subsp. japonica GN=Os02g0218200 PE=2 SV=1	PF08122//PF01433//PF04117//PF07822	NADH-ubiquinone oxidoreductase B12 subunit family//Peptidase family M1//Mpv17 / PMP22 family//Neurotoxin B-IV-like protein	GO:0009405//GO:0006810//GO:0022900	pathogenesis//transport//electron transport chain	GO:0008237//GO:0008270//GO:0019871	metallopeptidase activity//zinc ion binding//sodium channel inhibitor activity	GO:0005576//GO:0005747//GO:0005739//GO:0016021	extracellular region//mitochondrial respiratory chain complex I//mitochondrion//integral component of membrane	KOG1046	Puromycin-sensitive aminopeptidase and related aminopeptidases
Cluster-31803.17152	263.91	5997.75	-4.5063	8.54e-20	4725	552836761	XP_005849223.1	462	2.4e-43	hypothetical protein CHLNCDRAFT_51447 [Chlorella variabilis]>gi|307108882|gb|EFN57121.1| hypothetical protein CHLNCDRAFT_51447 [Chlorella variabilis]	--	--	--	--	--	--	--	--	--	P04072	319	1.3e-27	Thermitase OS=Thermoactinomyces vulgaris PE=1 SV=1	PF00082	Subtilase family	GO:0006508	proteolysis	GO:0004252	serine-type endopeptidase activity	--	--	--	--
Cluster-31803.25575	3493.76	135.106	4.6926	9.2e-20	652	552830324	XP_005847876.1	368	2.6e-33	hypothetical protein CHLNCDRAFT_15057, partial [Chlorella variabilis]>gi|307107532|gb|EFN55774.1| hypothetical protein CHLNCDRAFT_15057, partial [Chlorella variabilis]	--	--	--	--	--	K12133	LHY	MYB-related transcription factor LHY	http://www.genome.jp/dbget-bin/www_bget?ko:K12133	P92973	293	1.8e-25	Protein CCA1 OS=Arabidopsis thaliana GN=CCA1 PE=1 SV=1	--	--	--	--	GO:0003682//GO:0003677	chromatin binding//DNA binding	GO:0000785	chromatin	--	--
Cluster-31803.83457	95.0943	18100.6	-7.5725	9.96e-20	2520	552812277	XP_005843670.1	707	5e-72	hypothetical protein CHLNCDRAFT_140053 [Chlorella variabilis]>gi|307103307|gb|EFN51568.1| hypothetical protein CHLNCDRAFT_140053 [Chlorella variabilis]	--	--	--	--	--	--	--	--	--	--	--	--	--	PF03567//PF06990	Sulfotransferase family//Galactose-3-O-sulfotransferase	GO:0006687//GO:0009058	glycosphingolipid metabolic process//biosynthetic process	GO:0008146//GO:0001733	sulfotransferase activity//galactosylceramide sulfotransferase activity	GO:0005794//GO:0016021	Golgi apparatus//integral component of membrane	--	--
Cluster-31803.11709	103.24	2875.72	-4.7998	1.07e-19	2313	--	--	--	--	--	--	--	--	--	--	--	--	--	--	--	--	--	--	--	--	--	--	--	--	--	--	--	--
Cluster-31803.69111	136.62	3382.19	-4.6297	1.36e-19	1029	--	--	--	--	--	--	--	--	--	--	--	--	--	--	--	--	--	--	--	--	--	--	--	--	--	--	--	--
Cluster-31803.11191	9.13832	738.937	-6.3374	1.51e-19	858	552814473	XP_005844197.1	819	1.8e-85	hypothetical protein CHLNCDRAFT_54697 [Chlorella variabilis]>gi|307103838|gb|EFN52095.1| hypothetical protein CHLNCDRAFT_54697 [Chlorella variabilis]			209	3.96e-103		--	--	--	--	--	--	--	--	--	--	--	--	--	--	--	--	--	--
Cluster-31803.11915	21.978	1070.11	-5.6056	1.56e-19	701	--	--	--	--	--	--	--	--	--	--	--	--	--	--	--	--	--	--	--	--	--	--	--	--	--	--	--	--
Cluster-31803.30101	4197.36	173.837	4.5937	1.64e-19	874	--	--	--	--	--	--	--	--	--	--	--	--	--	--	--	--	--	--	PF01694	Rhomboid family	--	--	GO:0004252	serine-type endopeptidase activity	GO:0016021	integral component of membrane	--	--
Cluster-31803.104269	29.4605	1206.79	-5.3562	4.75e-19	966	545369347	XP_005649423.1	494	9.6e-48	hypothetical protein COCSUDRAFT_14223 [Coccomyxa subellipsoidea C-169]>gi|384251401|gb|EIE24879.1| hypothetical protein COCSUDRAFT_14223 [Coccomyxa subellipsoidea C-169]	--	--	--	--	--	K07752	CPD	carboxypeptidase D	http://www.genome.jp/dbget-bin/www_bget?ko:K07752	Q9JHW1	331	1.1e-29	Carboxypeptidase D OS=Rattus norvegicus GN=Cpd PE=2 SV=2	PF00246	Zinc carboxypeptidase	GO:0006508	proteolysis	GO:0008270//GO:0004180//GO:0004181	zinc ion binding//carboxypeptidase activity//metallocarboxypeptidase activity	--	--	KOG2649	Zinc carboxypeptidase
Cluster-31803.104173	28.9231	1173.78	-5.3428	9.54e-19	1237	552843398	XP_005850829.1	388	2.4e-35	hypothetical protein CHLNCDRAFT_56850 [Chlorella variabilis]>gi|307110491|gb|EFN58727.1| hypothetical protein CHLNCDRAFT_56850 [Chlorella variabilis]	--	--	--	--	--	--	--	--	--	--	--	--	--	PF01284	Membrane-associating domain	--	--	--	--	GO:0016020	membrane	--	--
Cluster-31803.54201	7983.17	399.683	4.32	1.26e-18	2124	12831437	AAK02066.1	1169	1.1e-125	nitrate transporter NTR [Chlorella sorokiniana]			447	0		K02575	NRT, narK, nrtP, nasA	MFS transporter, NNP family, nitrate/nitrite transporter	http://www.genome.jp/dbget-bin/www_bget?ko:K02575	Q9FJH8	635	1.3e-64	High affinity nitrate transporter 2.4 OS=Arabidopsis thaliana GN=NRT2.4 PE=2 SV=1	PF07690//PF08711	Major Facilitator Superfamily//TFIIS helical bundle-like domain	GO:0055085//GO:0006351	transmembrane transport//transcription, DNA-templated	GO:0003677	DNA binding	GO:0005634//GO:0016021	nucleus//integral component of membrane	--	--
Cluster-31803.73292	537.002	2.2602	7.8923	1.26e-18	1828	--	--	--	--	--	--	--	--	--	--	--	--	--	--	--	--	--	--	--	--	--	--	--	--	--	--	--	--
Cluster-31803.83829	719.858	16478.5	-4.5167	1.44e-18	1668	552831185	XP_005848074.1	711	1.1e-72	hypothetical protein CHLNCDRAFT_145302 [Chlorella variabilis]>gi|307107730|gb|EFN55972.1| hypothetical protein CHLNCDRAFT_145302 [Chlorella variabilis]	--	--	--	--	--	--	--	--	--	--	--	--	--	PF00150//PF15319	Cellulase (glycosyl hydrolase family 5)//RAD9, RAD1, HUS1-interacting nuclear orphan protein	GO:0071479//GO:0005975//GO:0000077	cellular response to ionizing radiation//carbohydrate metabolic process//DNA damage checkpoint	GO:0004553	hydrolase activity, hydrolyzing O-glycosyl compounds	GO:0005634	nucleus	--	--
Cluster-31803.104828	1.4234	432.497	-8.2472	1.99e-18	1245	552826130	XP_005846961.1	677	7.5e-69	expressed protein [Chlorella variabilis]>gi|307106614|gb|EFN54859.1| expressed protein [Chlorella variabilis]	--	--	--	--	--	--	--	--	--	--	--	--	--	PF10462	Peptidase M66	--	--	GO:0004222	metalloendopeptidase activity	--	--	--	--
Cluster-31803.11666	649.724	11820.8	-4.1854	2.21e-18	746	552847971	XP_005851991.1	576	2.3e-57	hypothetical protein CHLNCDRAFT_132900 [Chlorella variabilis]>gi|307111655|gb|EFN59889.1| hypothetical protein CHLNCDRAFT_132900 [Chlorella variabilis]	--	--	--	--	--	K01366	CTSH	cathepsin H	http://www.genome.jp/dbget-bin/www_bget?ko:K01366	Q24940	279	8.8e-24	Cathepsin L-like proteinase OS=Fasciola hepatica GN=Cat-1 PE=1 SV=1	PF09360//PF00112	Iron-binding zinc finger CDGSH type//Papain family cysteine protease	GO:0006508	proteolysis	GO:0008234//GO:0051537	cysteine-type peptidase activity//2 iron, 2 sulfur cluster binding	GO:0043231	intracellular membrane-bounded organelle	--	--
Cluster-31803.11707	5.73233	584.203	-6.6712	2.21e-18	642	--	--	--	--	--	--	--	--	--	--	--	--	--	--	--	--	--	--	PF07382	Histone H1-like nucleoprotein HC2	GO:0030261	chromosome condensation	GO:0003677	DNA binding	--	--	--	--
Cluster-31803.75172	465.186	0.589159	9.6249	2.9e-18	11661	760446893	XP_011400515.1	1349	8.4e-146	125 kDa kinesin-related protein, partial [Auxenochlorella protothecoides]>gi|675350040|gb|KFM22480.1| 125 kDa kinesin-related protein, partial [Auxenochlorella protothecoides]			482	0		K10398	KIF11, EG5	kinesin family member 11	http://www.genome.jp/dbget-bin/www_bget?ko:K10398	O23826	1264	8.4e-137	125 kDa kinesin-related protein OS=Nicotiana tabacum GN=TKRP125 PE=1 SV=1	PF02166//PF01985//PF06305//PF05676//PF00225//PF04995//PF01623//PF03381	Androgen receptor//CRS1 / YhbY (CRM) domain//Protein of unknown function (DUF1049)//NADH-ubiquinone oxidoreductase B18 subunit (NDUFB7)//Kinesin motor domain//Heme exporter protein D (CcmD)//Carlavirus putative nucleic acid binding protein//LEM3 (ligand-effect modulator 3) family / CDC50 family	GO:0006744//GO:0007165//GO:0015992//GO:0007017//GO:0030521//GO:0006814//GO:0006118//GO:0015886//GO:0006120//GO:0007018//GO:0017004//GO:0006355	ubiquinone biosynthetic process//signal transduction//proton transport//microtubule-based process//androgen receptor signaling pathway//sodium ion transport//obsolete electron transport//heme transport//mitochondrial electron transport, NADH to ubiquinone//microtubule-based movement//cytochrome complex assembly//regulation of transcription, DNA-templated	GO:0004882//GO:0003777//GO:0003723//GO:0003677//GO:0005524//GO:0005496//GO:0003954//GO:0008137//GO:0008017//GO:0003676	androgen receptor activity//microtubule motor activity//RNA binding//DNA binding//ATP binding//steroid binding//NADH dehydrogenase activity//NADH dehydrogenase (ubiquinone) activity//microtubule binding//nucleic acid binding	GO:0005739//GO:0005887//GO:0005874//GO:0045298//GO:0016021//GO:0005634//GO:0016020	mitochondrion//integral component of plasma membrane//microtubule//tubulin complex//integral component of membrane//nucleus//membrane	KOG0243	Kinesin-like protein
Cluster-31803.76450	371.314	7239.68	-4.2852	3.08e-18	1217	552815265	XP_005844400.1	226	1.4e-16	hypothetical protein CHLNCDRAFT_139056 [Chlorella variabilis]>gi|307104042|gb|EFN52298.1| hypothetical protein CHLNCDRAFT_139056 [Chlorella variabilis]	--	--	--	--	--	--	--	--	--	--	--	--	--	--	--	--	--	--	--	--	--	--	--
Cluster-31803.99576	35.7424	1243.31	-5.1204	3.91e-18	2324	552846152	XP_005851540.1	534	5.3e-52	hypothetical protein CHLNCDRAFT_137990 [Chlorella variabilis]>gi|307111203|gb|EFN59438.1| hypothetical protein CHLNCDRAFT_137990 [Chlorella variabilis]			46	4.5e-12		K11446	KDM5, JARID1	histone demethylase JARID1	http://www.genome.jp/dbget-bin/www_bget?ko:K11446	Q9V6L0	286	4.3e-24	Probable lysine-specific demethylase 4B OS=Drosophila melanogaster GN=Kdm4B PE=3 SV=3	PF09026	Centromere protein B dimerisation domain	GO:0006355	regulation of transcription, DNA-templated	GO:0003682//GO:0003677	chromatin binding//DNA binding	GO:0005634//GO:0000785//GO:0000775	nucleus//chromatin//chromosome, centromeric region	KOG0958	DNA damage-responsive repressor GIS1/RPH1, jumonji superfamily
Cluster-31803.65991	402.752	7631.35	-4.244	4.73e-18	3711	552826862	XP_005847113.1	1866	3e-206	hypothetical protein CHLNCDRAFT_52783 [Chlorella variabilis]>gi|307106766|gb|EFN55011.1| hypothetical protein CHLNCDRAFT_52783 [Chlorella variabilis]	--	--	--	--	--	K14457	MOGAT2, MGAT2	2-acylglycerol O-acyltransferase 2	http://www.genome.jp/dbget-bin/www_bget?ko:K14457	Q9ASU1	256	2e-20	Diacylglycerol O-acyltransferase 2 OS=Arabidopsis thaliana GN=DGAT2 PE=2 SV=1	PF03982	Diacylglycerol acyltransferase	--	--	GO:0016747	transferase activity, transferring acyl groups other than amino-acyl groups	--	--	KOG0831	Acyl-CoA:diacylglycerol acyltransferase (DGAT)
Cluster-31803.51503	10.966	699.824	-5.9959	5.15e-18	4260	552817848	XP_005845046.1	813	4.3e-84	hypothetical protein CHLNCDRAFT_32311, partial [Chlorella variabilis]>gi|307104692|gb|EFN52944.1| hypothetical protein CHLNCDRAFT_32311, partial [Chlorella variabilis]			62	1.06e-20		K08818	CDC2L	cell division cycle 2-like	http://www.genome.jp/dbget-bin/www_bget?ko:K08818	A2XUW1	583	2.8e-58	Cyclin-dependent kinase G-2 OS=Oryza sativa subsp. indica GN=CDKG-2 PE=3 SV=1	PF00069//PF07714	Protein kinase domain//Protein tyrosine kinase	GO:0006468//GO:0016310//GO:0009069	protein phosphorylation//phosphorylation//serine family amino acid metabolic process	GO:0004674//GO:0005524//GO:0004672	protein serine/threonine kinase activity//ATP binding//protein kinase activity	--	--	--	--
Cluster-31803.11883	23.4861	1001.73	-5.4145	5.39e-18	2981	552833193	XP_005848503.1	780	2e-80	hypothetical protein CHLNCDRAFT_144977 [Chlorella variabilis]>gi|307108160|gb|EFN56401.1| hypothetical protein CHLNCDRAFT_144977 [Chlorella variabilis]			341	5.93e-176		--	--	--	--	Q05648	132	3.9e-06	Uncharacterized protein YDR282C OS=Saccharomyces cerevisiae (strain ATCC 204508 / S288c) GN=YDR282C PE=3 SV=1	PF00072	Response regulator receiver domain	GO:0000160	phosphorelay signal transduction system	--	--	--	--	--	--
Cluster-31803.104127	85.7308	2133.55	-4.6373	5.56e-18	2072	552812772	XP_005843783.1	337	3.3e-29	hypothetical protein CHLNCDRAFT_139913 [Chlorella variabilis]>gi|307103421|gb|EFN51681.1| hypothetical protein CHLNCDRAFT_139913 [Chlorella variabilis]	--	--	--	--	--	--	--	--	--	Q7Z410	268	4.6e-22	Transmembrane protease serine 9 OS=Homo sapiens GN=TMPRSS9 PE=1 SV=2	PF00089	Trypsin	GO:0006508	proteolysis	GO:0004252//GO:0003824	serine-type endopeptidase activity//catalytic activity	--	--	--	--
Cluster-31803.12002	878.073	15076.5	-4.1018	6.45e-18	947	552841747	XP_005850391.1	598	8.2e-60	hypothetical protein CHLNCDRAFT_142269 [Chlorella variabilis]>gi|307110052|gb|EFN58289.1| hypothetical protein CHLNCDRAFT_142269 [Chlorella variabilis]	--	--	--	--	--	K01373	CTSF	cathepsin F	http://www.genome.jp/dbget-bin/www_bget?ko:K01373	Q24940	313	1.3e-27	Cathepsin L-like proteinase OS=Fasciola hepatica GN=Cat-1 PE=1 SV=1	PF09360//PF00112	Iron-binding zinc finger CDGSH type//Papain family cysteine protease	GO:0006508	proteolysis	GO:0051537//GO:0008234	2 iron, 2 sulfur cluster binding//cysteine-type peptidase activity	GO:0043231	intracellular membrane-bounded organelle	--	--
Cluster-31803.47117	0	550.375	#NAME?	6.61e-18	1085	760438621	XP_011396379.1	524	3.6e-51	putative 3-hydroxyisobutyrate dehydrogenase, mitochondrial [Auxenochlorella protothecoides]>gi|675351066|gb|KFM23506.1| putative 3-hydroxyisobutyrate dehydrogenase, mitochondrial [Auxenochlorella protothecoides]	--	--	--	--	--	K00020	E1.1.1.31, mmsB	3-hydroxyisobutyrate dehydrogenase	http://www.genome.jp/dbget-bin/www_bget?ko:K00020	Q9SUC0	478	1.1e-46	Probable 3-hydroxyisobutyrate dehydrogenase, mitochondrial OS=Arabidopsis thaliana GN=At4g20930 PE=2 SV=3	PF09297//PF14833//PF03446	NADH pyrophosphatase zinc ribbon domain//NAD-binding of NADP-dependent 3-hydroxyisobutyrate dehydrogenase//NAD binding domain of 6-phosphogluconate dehydrogenase	GO:0006098//GO:0055114//GO:0019521	pentose-phosphate shunt//oxidation-reduction process//D-gluconate metabolic process	GO:0016787//GO:0004616//GO:0051287//GO:0046872	hydrolase activity//phosphogluconate dehydrogenase (decarboxylating) activity//NAD binding//metal ion binding	--	--	KOG0409	Predicted dehydrogenase
Cluster-31803.22682	1408.62	23411.5	-4.0549	6.85e-18	1106	552826130	XP_005846961.1	523	4.8e-51	expressed protein [Chlorella variabilis]>gi|307106614|gb|EFN54859.1| expressed protein [Chlorella variabilis]	--	--	--	--	--	--	--	--	--	--	--	--	--	--	--	--	--	--	--	--	--	--	--
Cluster-31803.104719	7.8868	624.212	-6.3065	1.02e-17	806	--	--	--	--	--	--	--	--	--	--	--	--	--	--	--	--	--	--	--	--	--	--	--	--	--	--	--	--
Cluster-31803.97871	409.351	0	Inf	1.1e-17	2589	760448815	XP_011401476.1	1033	8.1e-110	Serine/threonine-protein kinase ATG1 [Auxenochlorella protothecoides]>gi|675356021|gb|KFM28461.1| Serine/threonine-protein kinase ATG1 [Auxenochlorella protothecoides]			41	3.02e-09		K08269	ULK1_2_3, ATG1	serine/threonine-protein kinase ULK/ATG1	http://www.genome.jp/dbget-bin/www_bget?ko:K08269	A1CHL6	620	8.8e-63	Serine/threonine-protein kinase atg1 OS=Aspergillus clavatus (strain ATCC 1007 / CBS 513.65 / DSM 816 / NCTC 3887 / NRRL 1) GN=atg1 PE=3 SV=1	PF00069//PF09606//PF06293//PF07057//PF03153//PF07714	Protein kinase domain//ARC105 or Med15 subunit of Mediator complex non-fungal//Lipopolysaccharide kinase (Kdo/WaaP) family//DNA helicase TraI//Transcription factor IIA, alpha/beta subunit//Protein tyrosine kinase	GO:0006357//GO:0006468//GO:0000746//GO:0006367	regulation of transcription from RNA polymerase II promoter//protein phosphorylation//conjugation//transcription initiation from RNA polymerase II promoter	GO:0016773//GO:0005524//GO:0003677//GO:0016818//GO:0003678//GO:0004672//GO:0001104	phosphotransferase activity, alcohol group as acceptor//ATP binding//DNA binding//hydrolase activity, acting on acid anhydrides, in phosphorus-containing anhydrides//DNA helicase activity//protein kinase activity//RNA polymerase II transcription cofactor activity	GO:0005672//GO:0016592//GO:0005657//GO:0016020	transcription factor TFIIA complex//mediator complex//replication fork//membrane	KOG0595	Serine/threonine-protein kinase involved in autophagy
Cluster-31803.60252	3627.45	152.838	4.5689	1.19e-17	866	--	--	--	--	--	--	--	--	--	--	--	--	--	--	--	--	--	--	--	--	--	--	--	--	--	--	--	--
Cluster-31803.78361	405.853	0	Inf	1.39e-17	4251	760437255	XP_011395696.1	258	9.8e-20	Negative elongation factor B [Auxenochlorella protothecoides]>gi|675350390|gb|KFM22830.1| Negative elongation factor B [Auxenochlorella protothecoides]	--	--	--	--	--	--	--	--	--	--	--	--	--	PF09328//PF14999//PF01584	Domain of unknown function (DUF1984)//Shadow of prion protein, neuroprotective//CheW-like domain	GO:0046938//GO:0006935//GO:0007165//GO:0010038	phytochelatin biosynthetic process//chemotaxis//signal transduction//response to metal ion	GO:0046872//GO:0016756//GO:0004871	metal ion binding//glutathione gamma-glutamylcysteinyltransferase activity//signal transducer activity	GO:0031225	anchored component of membrane	--	--
Cluster-31803.8445	19.5742	984.146	-5.6518	1.54e-17	2423	552821397	XP_005845837.1	208	3.5e-14	hypothetical protein CHLNCDRAFT_136317 [Chlorella variabilis]>gi|307105486|gb|EFN53735.1| hypothetical protein CHLNCDRAFT_136317 [Chlorella variabilis]	--	--	--	--	--	--	--	--	--	Q6H509	170	1.3e-10	Squamosa promoter-binding-like protein 4 OS=Oryza sativa subsp. japonica GN=SPL4 PE=2 SV=1	PF03110	SBP domain	--	--	GO:0003677	DNA binding	GO:0005634	nucleus	--	--
Cluster-31803.21998	23.2101	939.239	-5.3387	2.93e-17	1953	255085164	XP_002505013.1	238	9.4e-18	hypothetical protein MICPUN_62693 [Micromonas sp. RCC299]>gi|226520282|gb|ACO66271.1| hypothetical protein MICPUN_62693 [Micromonas sp. RCC299]	--	--	--	--	--	--	--	--	--	Q09174	141	2.3e-07	Alpha-1,2-galactosyltransferase OS=Schizosaccharomyces pombe (strain 972 / ATCC 24843) GN=gma12 PE=1 SV=1	PF05637	galactosyl transferase GMA12/MNN10 family	--	--	GO:0016757	transferase activity, transferring glycosyl groups	GO:0016021	integral component of membrane	--	--
Cluster-31803.99850	396.63	6911.29	-4.1231	3e-17	1030	--	--	--	--	--	--	--	--	--	--	--	--	--	--	--	--	--	--	PF09606	ARC105 or Med15 subunit of Mediator complex non-fungal	GO:0006357	regulation of transcription from RNA polymerase II promoter	GO:0001104	RNA polymerase II transcription cofactor activity	GO:0016592	mediator complex	--	--
Cluster-31803.106271	457.918	1.17832	8.6022	3.22e-17	1324	12831437	AAK02066.1	743	1.8e-76	nitrate transporter NTR [Chlorella sorokiniana]			326	5.66e-168		K02575	NRT, narK, nrtP, nasA	MFS transporter, NNP family, nitrate/nitrite transporter	http://www.genome.jp/dbget-bin/www_bget?ko:K02575	P0DKG9	461	1.2e-44	High-affinity nitrate transporter 2.1 OS=Oryza sativa subsp. japonica GN=NRT2.1 PE=1 SV=1	PF07690	Major Facilitator Superfamily	GO:0055085	transmembrane transport	--	--	GO:0016021	integral component of membrane	--	--
Cluster-31803.103351	162.125	3219.1	-4.3115	3.43e-17	703	552838743	XP_005849643.1	268	1.1e-21	hypothetical protein CHLNCDRAFT_143169 [Chlorella variabilis]>gi|307109303|gb|EFN57541.1| hypothetical protein CHLNCDRAFT_143169 [Chlorella variabilis]	--	--	--	--	--	--	--	--	--	--	--	--	--	PF03820	Tricarboxylate carrier	GO:0006811//GO:0055085	ion transport//transmembrane transport	GO:0015075	ion transmembrane transporter activity	GO:0016020	membrane	--	--
Cluster-31803.25573	3690.96	192.479	4.2612	3.46e-17	861	--	--	--	--	--	--	--	--	--	--	--	--	--	--	--	--	--	--	--	--	--	--	--	--	--	--	--	--
Cluster-31803.103459	1304.51	20293.8	-3.9595	4.54e-17	2587	--	--	--	--	--	--	--	--	--	--	--	--	--	--	--	--	--	--	PF05887	Procyclic acidic repetitive protein (PARP)	--	--	--	--	GO:0016020	membrane	--	--
Cluster-31803.75814	389.31	0	Inf	4.73e-17	3316	552831493	XP_005848147.1	937	1.4e-98	hypothetical protein CHLNCDRAFT_145493 [Chlorella variabilis]>gi|307107803|gb|EFN56045.1| hypothetical protein CHLNCDRAFT_145493 [Chlorella variabilis]	--	--	--	--	--	--	--	--	--	--	--	--	--	--	--	--	--	--	--	--	--	--	--
Cluster-31803.38042	1084.85	0	Inf	4.85e-17	1865	552833033	XP_005848466.1	764	9.1e-79	hypothetical protein CHLNCDRAFT_144859 [Chlorella variabilis]>gi|307108123|gb|EFN56364.1| hypothetical protein CHLNCDRAFT_144859 [Chlorella variabilis]			260	3.93e-131		K01951	guaA, GMPS	GMP synthase (glutamine-hydrolysing)	http://www.genome.jp/dbget-bin/www_bget?ko:K01951	Q6MLD2	543	5.4e-54	GMP synthase [glutamine-hydrolyzing] OS=Bdellovibrio bacteriovorus (strain ATCC 15356 / DSM 50701 / NCIB 9529 / HD100) GN=guaA PE=3 SV=1	PF00958//PF01340	GMP synthase C terminal domain//Met Apo-repressor, MetJ	GO:0006177//GO:0006555//GO:0006144//GO:0006355//GO:0006164//GO:0006536	GMP biosynthetic process//methionine metabolic process//purine nucleobase metabolic process//regulation of transcription, DNA-templated//purine nucleotide biosynthetic process//glutamate metabolic process	GO:0003922//GO:0005524//GO:0003700//GO:0016462	GMP synthase (glutamine-hydrolyzing) activity//ATP binding//transcription factor activity, sequence-specific DNA binding//pyrophosphatase activity	GO:0005667	transcription factor complex	KOG1622	GMP synthase
Cluster-31803.69071	190.794	3578.01	-4.2291	4.97e-17	604	--	--	--	--	--	--	--	--	--	--	--	--	--	--	--	--	--	--	--	--	--	--	--	--	--	--	--	--
Cluster-31803.63282	379.641	0	Inf	1.02e-16	5850	552842583	XP_005850606.1	2525	1.8e-282	hypothetical protein CHLNCDRAFT_140553 [Chlorella variabilis]>gi|307110268|gb|EFN58504.1| hypothetical protein CHLNCDRAFT_140553 [Chlorella variabilis]			774	0		--	--	--	--	B1AVH7	428	3.7e-40	TBC1 domain family member 2A OS=Mus musculus GN=Tbc1d2 PE=2 SV=1	PF10408//PF03357//PF03206	Ubiquitin elongating factor core//Snf7//Nitrogen fixation protein NifW	GO:0009399//GO:0006511//GO:0044267//GO:0007034//GO:0016567	nitrogen fixation//ubiquitin-dependent protein catabolic process//cellular protein metabolic process//vacuolar transport//protein ubiquitination	GO:0034450//GO:0016881	ubiquitin-ubiquitin ligase activity//acid-amino acid ligase activity	GO:0000151	ubiquitin ligase complex	KOG2058	Ypt/Rab GTPase activating protein
Cluster-31803.59151	1957.61	29741.7	-3.9253	1.12e-16	308	552809186	XP_005842883.1	320	4.6e-28	hypothetical protein CHLNCDRAFT_142476 [Chlorella variabilis]>gi|307102498|gb|EFN50771.1| hypothetical protein CHLNCDRAFT_142476 [Chlorella variabilis]			63	1.92e-22		--	--	--	--	--	--	--	--	PF07562//PF00020//PF02150	Nine Cysteines Domain of family 3 GPCR//TNFR/NGFR cysteine-rich region//RNA polymerases M/15 Kd subunit	GO:0007186//GO:0006144//GO:0006351//GO:0006206	G-protein coupled receptor signaling pathway//purine nucleobase metabolic process//transcription, DNA-templated//pyrimidine nucleobase metabolic process	GO:0003677//GO:0005515//GO:0004930//GO:0003899	DNA binding//protein binding//G-protein coupled receptor activity//DNA-directed RNA polymerase activity	GO:0005730	nucleolus	--	--
Cluster-31803.96747	196.877	3616	-4.199	1.12e-16	3304	--	--	--	--	--	--	--	--	--	--	--	--	--	--	--	--	--	--	PF09328	Domain of unknown function (DUF1984)	GO:0046938//GO:0010038	phytochelatin biosynthetic process//response to metal ion	GO:0046872//GO:0016756	metal ion binding//glutathione gamma-glutamylcysteinyltransferase activity	--	--	--	--
Cluster-31803.36696	377.925	0	Inf	1.13e-16	3051	693499901	CEF97953.1	145	8.9e-07	Fibronectin, type III [Ostreococcus tauri]	--	--	--	--	--	--	--	--	--	--	--	--	--	PF00041	Fibronectin type III domain	--	--	GO:0005515	protein binding	--	--	--	--
Cluster-31803.41416	0	468.507	#NAME?	1.47e-16	1579	552828723	XP_005847541.1	667	1.4e-67	hypothetical protein CHLNCDRAFT_35384 [Chlorella variabilis]>gi|307107196|gb|EFN55439.1| hypothetical protein CHLNCDRAFT_35384 [Chlorella variabilis]			147	2.17e-68		K01408	IDE, ide	insulysin	http://www.genome.jp/dbget-bin/www_bget?ko:K01408	O22941	348	1.9e-31	Zinc-metallopeptidase, peroxisomal OS=Arabidopsis thaliana GN=PXM16 PE=2 SV=1	--	--	--	--	GO:0003824//GO:0043169	catalytic activity//cation binding	--	--	KOG0959	N-arginine dibasic convertase NRD1 and related Zn2+-dependent endopeptidases, insulinase superfamily
Cluster-31803.103414	700.954	10761.3	-3.9404	1.52e-16	440	--	--	--	--	--	--	--	--	--	--	--	--	--	--	--	--	--	--	PF07359	Liver-expressed antimicrobial peptide 2 precursor (LEAP-2)	GO:0042742	defense response to bacterium	--	--	--	--	--	--
Cluster-31803.105504	0	300.54	#NAME?	1.52e-16	978	--	--	--	--	--	--	--	--	--	--	--	--	--	--	--	--	--	--	PF05531//PF16740//PF10099//PF04513//PF01920	Nucleopolyhedrovirus P10 protein//Spindle and kinetochore-associated protein 2//Anti-sigma-K factor rskA//Baculovirus polyhedron envelope protein, PEP, C terminus//Prefoldin subunit	GO:0006457//GO:0000090//GO:0007067//GO:0031110//GO:0007059//GO:0051301	protein folding//mitotic anaphase//mitotic nuclear division//regulation of microtubule polymerization or depolymerization//chromosome segregation//cell division	GO:0051082//GO:0008017//GO:0005198	unfolded protein binding//microtubule binding//structural molecule activity	GO:0005886//GO:0019028//GO:0019031//GO:0045298//GO:0000940//GO:0016021//GO:0005876//GO:0016272	plasma membrane//viral capsid//viral envelope//tubulin complex//condensed chromosome outer kinetochore//integral component of membrane//spindle microtubule//prefoldin complex	--	--
Cluster-31803.74240	1764.1	74.0336	4.5746	1.83e-16	531	--	--	--	--	--	--	--	--	--	--	--	--	--	--	--	--	--	--	--	--	--	--	--	--	--	--	--	--
Cluster-31803.96487	117.002	2341.41	-4.3228	1.83e-16	3137	552822123	XP_005846030.1	143	1.6e-06	hypothetical protein CHLNCDRAFT_53437 [Chlorella variabilis]>gi|307105680|gb|EFN53928.1| hypothetical protein CHLNCDRAFT_53437 [Chlorella variabilis]	--	--	--	--	--	--	--	--	--	--	--	--	--	PF00269	Small, acid-soluble spore proteins, alpha/beta type	GO:0006265	DNA topological change	GO:0003690	double-stranded DNA binding	--	--	--	--
Cluster-31803.62621	368.426	0	Inf	2.35e-16	6726	633912665	KDD76488.1	2350	4.1e-262	sucrose synthase [Helicosporidium sp. ATCC 50920]			993	0		K00695	E2.4.1.13	sucrose synthase	http://www.genome.jp/dbget-bin/www_bget?ko:K00695	Q9M111	2188	3.5e-244	Sucrose synthase 3 OS=Arabidopsis thaliana GN=SUS3 PE=1 SV=1	PF00862//PF00185//PF01842//PF13291	Sucrose synthase//Aspartate/ornithine carbamoyltransferase, Asp/Orn binding domain//ACT domain//ACT domain	GO:0006520//GO:0005982//GO:0005985//GO:0008152	cellular amino acid metabolic process//starch metabolic process//sucrose metabolic process//metabolic process	GO:0016157//GO:0016597//GO:0016743	sucrose synthase activity//amino acid binding//carboxyl- or carbamoyltransferase activity	--	--	--	--
Cluster-31803.56685	67.0886	1577.86	-4.5558	2.4e-16	2884	552832502	XP_005848360.1	326	8.7e-28	hypothetical protein CHLNCDRAFT_145099 [Chlorella variabilis]>gi|307108017|gb|EFN56258.1| hypothetical protein CHLNCDRAFT_145099 [Chlorella variabilis]	--	--	--	--	--	--	--	--	--	--	--	--	--	PF07562//PF00020//PF00424	Nine Cysteines Domain of family 3 GPCR//TNFR/NGFR cysteine-rich region//REV protein (anti-repression trans-activator protein)	GO:0006355//GO:0007186	regulation of transcription, DNA-templated//G-protein coupled receptor signaling pathway	GO:0003700//GO:0004930//GO:0005515	transcription factor activity, sequence-specific DNA binding//G-protein coupled receptor activity//protein binding	GO:0005667//GO:0042025	transcription factor complex//host cell nucleus	--	--
Cluster-31803.98976	11.196	628.429	-5.8107	2.66e-16	788	--	--	--	--	--	--	--	--	--	--	--	--	--	--	--	--	--	--	--	--	--	--	--	--	--	--	--	--
Cluster-31803.91620	15.6574	721.741	-5.5266	2.88e-16	3460	552826130	XP_005846961.1	732	8.7e-75	expressed protein [Chlorella variabilis]>gi|307106614|gb|EFN54859.1| expressed protein [Chlorella variabilis]	--	--	--	--	--	--	--	--	--	--	--	--	--	--	--	--	--	--	--	--	--	--	--
Cluster-31803.63895	2236.85	103.52	4.4335	3.36e-16	3817	552827083	XP_005847166.1	1027	6e-109	hypothetical protein CHLNCDRAFT_35843 [Chlorella variabilis]>gi|307106819|gb|EFN55064.1| hypothetical protein CHLNCDRAFT_35843 [Chlorella variabilis]			364	0		K00472	E1.14.11.2	prolyl 4-hydroxylase	http://www.genome.jp/dbget-bin/www_bget?ko:K00472	Q8L970	639	8.2e-65	Probable prolyl 4-hydroxylase 7 OS=Arabidopsis thaliana GN=P4H7 PE=2 SV=1	PF13640//PF03171//PF02362	2OG-Fe(II) oxygenase superfamily//2OG-Fe(II) oxygenase superfamily//B3 DNA binding domain	GO:0055114	oxidation-reduction process	GO:0005506//GO:0016491//GO:0016706//GO:0031418//GO:0003677	iron ion binding//oxidoreductase activity//oxidoreductase activity, acting on paired donors, with incorporation or reduction of molecular oxygen, 2-oxoglutarate as one donor, and incorporation of one atom each of oxygen into both donors//L-ascorbic acid binding//DNA binding	--	--	--	--
Cluster-31803.39863	683.351	10104.8	-3.8863	3.37e-16	1379	552810312	XP_005843169.1	312	1.7e-26	hypothetical protein CHLNCDRAFT_59333 [Chlorella variabilis]>gi|307102800|gb|EFN51067.1| hypothetical protein CHLNCDRAFT_59333 [Chlorella variabilis]	--	--	--	--	--	--	--	--	--	--	--	--	--	--	--	--	--	--	--	--	--	--	--
Cluster-31803.100813	0	291.664	#NAME?	3.46e-16	1403	--	--	--	--	--	--	--	--	--	--	--	--	--	--	--	--	--	--	PF00049	Insulin/IGF/Relaxin family	GO:0007165	signal transduction	GO:0005179	hormone activity	GO:0005576	extracellular region	--	--
Cluster-31803.103324	1.77925	373.586	-7.714	3.7e-16	1010	552812277	XP_005843670.1	447	2.8e-42	hypothetical protein CHLNCDRAFT_140053 [Chlorella variabilis]>gi|307103307|gb|EFN51568.1| hypothetical protein CHLNCDRAFT_140053 [Chlorella variabilis]	--	--	--	--	--	--	--	--	--	--	--	--	--	PF03567//PF06990	Sulfotransferase family//Galactose-3-O-sulfotransferase	GO:0009058//GO:0006687	biosynthetic process//glycosphingolipid metabolic process	GO:0001733//GO:0008146	galactosylceramide sulfotransferase activity//sulfotransferase activity	GO:0016021//GO:0005794	integral component of membrane//Golgi apparatus	--	--
Cluster-31803.46984	369.726	0	Inf	3.7e-16	4317	545364827	XP_005647447.1	1747	2.2e-192	hypothetical protein COCSUDRAFT_16391 [Coccomyxa subellipsoidea C-169]>gi|384249421|gb|EIE22903.1| hypothetical protein COCSUDRAFT_16391 [Coccomyxa subellipsoidea C-169]			198	2.68e-96		--	--	--	--	Q8CCP0	858	3.7e-90	Nuclear export mediator factor Nemf OS=Mus musculus GN=Nemf PE=1 SV=2	PF08534//PF00578//PF10152//PF00462//PF07912//PF00085//PF13639//PF01216	Redoxin//AhpC/TSA family//Predicted coiled-coil domain-containing protein (DUF2360)//Glutaredoxin//ERp29, N-terminal domain//Thioredoxin//Ring finger domain//Calsequestrin	GO:0006118//GO:0045454//GO:0009306//GO:0055114	obsolete electron transport//cell redox homeostasis//protein secretion//oxidation-reduction process	GO:0016491//GO:0005509//GO:0008270//GO:0005515//GO:0015035//GO:0016209//GO:0009055	oxidoreductase activity//calcium ion binding//zinc ion binding//protein binding//protein disulfide oxidoreductase activity//antioxidant activity//electron carrier activity	GO:0071203//GO:0005788	WASH complex//endoplasmic reticulum lumen	KOG2030	Predicted RNA-binding protein
Cluster-31803.22380	16.1391	740.844	-5.5205	3.95e-16	481	--	--	--	--	--	--	--	--	--	--	--	--	--	--	--	--	--	--	--	--	--	--	--	--	--	--	--	--
Cluster-31803.103268	143.18	2728.67	-4.2523	4.16e-16	845	552815265	XP_005844400.1	513	5.3e-50	hypothetical protein CHLNCDRAFT_139056 [Chlorella variabilis]>gi|307104042|gb|EFN52298.1| hypothetical protein CHLNCDRAFT_139056 [Chlorella variabilis]			179	1.85e-86		--	--	--	--	--	--	--	--	PF01342	SAND domain	--	--	GO:0003677	DNA binding	--	--	--	--
Cluster-31803.42932	0	286.312	#NAME?	4.54e-16	2104	545371315	XP_005650231.1	405	4.4e-37	hypothetical protein COCSUDRAFT_64779 [Coccomyxa subellipsoidea C-169]>gi|384252211|gb|EIE25687.1| hypothetical protein COCSUDRAFT_64779 [Coccomyxa subellipsoidea C-169]	--	--	--	--	--	--	--	--	--	A1L4X0	254	2e-20	Protein CLT2, chloroplastic OS=Arabidopsis thaliana GN=CLT2 PE=2 SV=1	PF16934	Two-component Enterococcus faecalis cytolysin (EFC)	GO:0050830	defense response to Gram-positive bacterium	--	--	--	--	--	--
Cluster-31803.61764	99.9842	2149.86	-4.4264	5.6e-16	1383	552841264	XP_005850260.1	949	2.4e-100	hypothetical protein CHLNCDRAFT_57026 [Chlorella variabilis]>gi|307109921|gb|EFN58158.1| hypothetical protein CHLNCDRAFT_57026 [Chlorella variabilis]	--	--	--	--	--	--	--	--	--	Q8K2T1	364	2.3e-33	NmrA-like family domain-containing protein 1 OS=Mus musculus GN=Nmral1 PE=1 SV=1	PF01113//PF01370//PF01118//PF01073//PF02254	Dihydrodipicolinate reductase, N-terminus//NAD dependent epimerase/dehydratase family//Semialdehyde dehydrogenase, NAD binding domain//3-beta hydroxysteroid dehydrogenase/isomerase family//TrkA-N domain	GO:0006694//GO:0008210//GO:0055114//GO:0009085//GO:0008207//GO:0008209//GO:0009089//GO:0006813	steroid biosynthetic process//estrogen metabolic process//oxidation-reduction process//lysine biosynthetic process//C21-steroid hormone metabolic process//androgen metabolic process//lysine biosynthetic process via diaminopimelate//potassium ion transport	GO:0016620//GO:0051287//GO:0008839//GO:0003854//GO:0050662//GO:0003824//GO:0016616	oxidoreductase activity, acting on the aldehyde or oxo group of donors, NAD or NADP as acceptor//NAD binding//4-hydroxy-tetrahydrodipicolinate reductase//3-beta-hydroxy-delta5-steroid dehydrogenase activity//coenzyme binding//catalytic activity//oxidoreductase activity, acting on the CH-OH group of donors, NAD or NADP as acceptor	--	--	--	--
Cluster-31803.100438	38.7247	1091.5	-4.8169	6.11e-16	3336	--	--	--	--	--	--	--	--	--	--	--	--	--	--	--	--	--	--	--	--	--	--	--	--	--	--	--	--
Cluster-31803.18289	271.501	4367.45	-4.0078	6.62e-16	731	552826130	XP_005846961.1	413	1.8e-38	expressed protein [Chlorella variabilis]>gi|307106614|gb|EFN54859.1| expressed protein [Chlorella variabilis]			57	1.05e-18		--	--	--	--	--	--	--	--	PF09111	SLIDE	GO:0006338	chromatin remodeling	GO:0005524//GO:0003676//GO:0016818	ATP binding//nucleic acid binding//hydrolase activity, acting on acid anhydrides, in phosphorus-containing anhydrides	GO:0005634	nucleus	--	--
Cluster-31803.81584	519.12	7614.99	-3.8747	7.69e-16	3172	552840214	XP_005849983.1	219	2.4e-15	hypothetical protein CHLNCDRAFT_57007 [Chlorella variabilis]>gi|307109644|gb|EFN57881.1| hypothetical protein CHLNCDRAFT_57007 [Chlorella variabilis]			37	6.21e-07		--	--	--	--	Q6Z461	182	6.7e-12	Squamosa promoter-binding-like protein 13 OS=Oryza sativa subsp. japonica GN=SPL13 PE=2 SV=1	PF03110	SBP domain	--	--	GO:0003677	DNA binding	GO:0005634	nucleus	--	--
Cluster-31803.103280	0.731066	905.352	-10.274	1.67e-15	1520	168066292	XP_001785074.1	243	1.9e-18	predicted protein [Physcomitrella patens]>gi|162663334|gb|EDQ50103.1| predicted protein [Physcomitrella patens]	--	--	--	--	--	--	--	--	--	--	--	--	--	--	--	--	--	--	--	--	--	--	--
Cluster-31803.99476	692.84	13.6863	5.6617	1.89e-15	2332	545362204	XP_005646346.1	824	1.3e-85	hypothetical protein COCSUDRAFT_66688 [Coccomyxa subellipsoidea C-169]>gi|384248318|gb|EIE21802.1| hypothetical protein COCSUDRAFT_66688 [Coccomyxa subellipsoidea C-169]	--	--	--	--	--	--	--	--	--	--	--	--	--	--	--	--	--	--	--	--	--	--	--
Cluster-31803.103138	576.513	8129.81	-3.8178	2.75e-15	762	552826130	XP_005846961.1	653	2.8e-66	expressed protein [Chlorella variabilis]>gi|307106614|gb|EFN54859.1| expressed protein [Chlorella variabilis]	--	--	--	--	--	--	--	--	--	--	--	--	--	--	--	--	--	--	--	--	--	--	--
Cluster-31803.99852	236.405	3707.01	-3.9709	3.02e-15	2176	--	--	--	--	--	--	--	--	--	--	--	--	--	--	--	--	--	--	--	--	--	--	--	--	--	--	--	--
Cluster-31803.43033	81.1435	1685.59	-4.3766	3.08e-15	5039	552840967	XP_005850188.1	1225	8.6e-132	expressed protein [Chlorella variabilis]>gi|307109849|gb|EFN58086.1| expressed protein [Chlorella variabilis]			430	0		K14818	SQT1	ribosome assembly protein SQT1	http://www.genome.jp/dbget-bin/www_bget?ko:K14818	Q00808	292	1.9e-24	Vegetative incompatibility protein HET-E-1 OS=Podospora anserina GN=HET-E1 PE=3 SV=1	PF01213//PF15673//PF00400//PF00720	Adenylate cyclase associated (CAP) N terminal//Domain of unknown function (DUF4664)//WD domain, G-beta repeat//Subtilisin inhibitor-like	GO:0007010//GO:0032922	cytoskeleton organization//circadian regulation of gene expression	GO:0003779//GO:0000976//GO:0005515//GO:0004867	actin binding//transcription regulatory region sequence-specific DNA binding//protein binding//serine-type endopeptidase inhibitor activity	--	--	KOG0296	Angio-associated migratory cell protein (contains WD40 repeats)
Cluster-31803.11695	469.933	6613.83	-3.815	3.16e-15	1107	--	--	--	--	--	--	--	--	--	--	--	--	--	--	--	--	--	--	--	--	--	--	--	--	--	--	--	--
Cluster-31803.35140	654.004	14.3146	5.5137	3.22e-15	5211	552830819	XP_005847994.1	859	2.5e-89	hypothetical protein CHLNCDRAFT_57780 [Chlorella variabilis]>gi|307107650|gb|EFN55892.1| hypothetical protein CHLNCDRAFT_57780 [Chlorella variabilis]			44	1.32e-10		--	--	--	--	Q66L49	135	3.1e-06	Calcium-binding mitochondrial carrier protein SCaMC-1 OS=Danio rerio GN=slc25a24 PE=2 SV=1	PF11744//PF04277//PF04632	Aluminium activated malate transporter//Oxaloacetate decarboxylase, gamma chain//Fusaric acid resistance protein family	GO:0006525//GO:0071436//GO:0006814//GO:0006560//GO:0015743//GO:0006090//GO:0006810	arginine metabolic process//sodium ion export//sodium ion transport//proline metabolic process//malate transport//pyruvate metabolic process//transport	GO:0015081//GO:0008948	sodium ion transmembrane transporter activity//oxaloacetate decarboxylase activity	GO:0016020//GO:0005886	membrane//plasma membrane	KOG0036	Predicted mitochondrial carrier protein
Cluster-31803.99512	0	397.447	#NAME?	3.75e-15	1894	552837659	XP_005849420.1	157	2.2e-08	hypothetical protein CHLNCDRAFT_143946 [Chlorella variabilis]>gi|307109079|gb|EFN57318.1| hypothetical protein CHLNCDRAFT_143946 [Chlorella variabilis]			276	5.09e-140		--	--	--	--	--	--	--	--	PF09142	tRNA Pseudouridine synthase II, C terminal	GO:0009451//GO:0001522	RNA modification//pseudouridine synthesis	GO:0003723//GO:0009982	RNA binding//pseudouridine synthase activity	--	--	--	--
Cluster-31803.93623	10.6755	569.067	-5.7362	3.75e-15	4129	552829380	XP_005847690.1	964	1.3e-101	hypothetical protein CHLNCDRAFT_134115 [Chlorella variabilis]>gi|307107345|gb|EFN55588.1| hypothetical protein CHLNCDRAFT_134115 [Chlorella variabilis]			330	1.07e-169		K15340	DCLRE1A, SNM1A, PSO2	DNA cross-link repair 1A protein	http://www.genome.jp/dbget-bin/www_bget?ko:K15340	Q9JIC3	404	1.6e-37	DNA cross-link repair 1A protein OS=Mus musculus GN=Dclre1a PE=2 SV=2	--	--	--	--	GO:0016787	hydrolase activity	--	--	KOG1361	Predicted hydrolase involved in interstrand cross-link repair
Cluster-31803.69740	776.351	10697.4	-3.7844	3.99e-15	676	--	--	--	--	--	--	--	--	--	--	--	--	--	--	--	--	--	--	PF04505	Interferon-induced transmembrane protein	GO:0009607	response to biotic stimulus	--	--	GO:0016021	integral component of membrane	--	--
Cluster-31803.9924	12.9074	620.687	-5.5876	4.19e-15	1309	--	--	--	--	--	--	--	--	--	--	--	--	--	--	--	--	--	--	PF01920//PF04513//PF04136//PF16740	Prefoldin subunit//Baculovirus polyhedron envelope protein, PEP, C terminus//Sec34-like family//Spindle and kinetochore-associated protein 2	GO:0051301//GO:0007059//GO:0000090//GO:0007067//GO:0031110//GO:0006886//GO:0006457	cell division//chromosome segregation//mitotic anaphase//mitotic nuclear division//regulation of microtubule polymerization or depolymerization//intracellular protein transport//protein folding	GO:0005198//GO:0008017//GO:0051082	structural molecule activity//microtubule binding//unfolded protein binding	GO:0016272//GO:0016020//GO:0005876//GO:0045298//GO:0019031//GO:0000940//GO:0005801//GO:0019028	prefoldin complex//membrane//spindle microtubule//tubulin complex//viral envelope//condensed chromosome outer kinetochore//cis-Golgi network//viral capsid	--	--
Cluster-31803.65135	331.841	0	Inf	4.28e-15	1283	552839855	XP_005849900.1	669	6.5e-68	hypothetical protein CHLNCDRAFT_143159 [Chlorella variabilis]>gi|307109560|gb|EFN57798.1| hypothetical protein CHLNCDRAFT_143159 [Chlorella variabilis]	--	--	--	--	--	--	--	--	--	--	--	--	--	--	--	--	--	--	--	--	--	--	--
Cluster-31803.48754	1.82766	348.998	-7.5771	5.01e-15	2210	--	--	--	--	--	--	--	--	--	--	--	--	--	--	--	--	--	--	PF02023//PF10186//PF00319	SCAN domain//Vacuolar sorting 38 and autophagy-related subunit 14//SRF-type transcription factor (DNA-binding and dimerisation domain)	GO:0010508//GO:0006355	positive regulation of autophagy//regulation of transcription, DNA-templated	GO:0003677//GO:0003700//GO:0046983	DNA binding//transcription factor activity, sequence-specific DNA binding//protein dimerization activity	GO:0005667	transcription factor complex	--	--
Cluster-31803.93730	3.20265	393.427	-6.9407	5.28e-15	1068	552830361	XP_005847885.1	804	1.2e-83	expressed protein [Chlorella variabilis]>gi|307107541|gb|EFN55783.1| expressed protein [Chlorella variabilis]			304	7.7e-156		--	--	--	--	--	--	--	--	--	--	--	--	--	--	--	--	--	--
Cluster-31803.74431	0	1240.04	#NAME?	5.6e-15	3333	552834168	XP_005848667.1	1142	2.4e-122	hypothetical protein CHLNCDRAFT_144236 [Chlorella variabilis]>gi|307108325|gb|EFN56565.1| hypothetical protein CHLNCDRAFT_144236 [Chlorella variabilis]	--	--	--	--	--	K18477	RMT2	protein arginine N-methyltransferase 2	http://www.genome.jp/dbget-bin/www_bget?ko:K18477	Q10170	445	2.2e-42	Protein arginine N-methyltransferase 2 OS=Schizosaccharomyces pombe (strain 972 / ATCC 24843) GN=rmt2 PE=3 SV=2	PF00106//PF01370//PF00023//PF13606//PF06951//PF02826	short chain dehydrogenase//NAD dependent epimerase/dehydratase family//Ankyrin repeat//Ankyrin repeat//Group XII secretory phospholipase A2 precursor (PLA2G12)//D-isomer specific 2-hydroxyacid dehydrogenase, NAD binding domain	GO:0016042//GO:0009395//GO:0055114//GO:0008152	lipid catabolic process//phospholipid catabolic process//oxidation-reduction process//metabolic process	GO:0016491//GO:0004623//GO:0003824//GO:0050662//GO:0051287//GO:0005509//GO:0005515	oxidoreductase activity//phospholipase A2 activity//catalytic activity//coenzyme binding//NAD binding//calcium ion binding//protein binding	GO:0005576	extracellular region	KOG1611	Predicted short chain-type dehydrogenase
Cluster-31803.22476	12.8106	616.178	-5.5879	5.72e-15	950	760442365	XP_011398251.1	552	1.8e-54	Ubiquinone biosynthesis protein COQ4-like protein, mitochondrial [Auxenochlorella protothecoides]>gi|675352918|gb|KFM25358.1| Ubiquinone biosynthesis protein COQ4-like protein, mitochondrial [Auxenochlorella protothecoides]			151	7.69e-71		K14510	CTR1	serine/threonine-protein kinase CTR1	http://www.genome.jp/dbget-bin/www_bget?ko:K14510	Q9FPR3	415	1.9e-39	Serine/threonine-protein kinase EDR1 OS=Arabidopsis thaliana GN=EDR1 PE=1 SV=1	PF00069//PF07714	Protein kinase domain//Protein tyrosine kinase	GO:0006468	protein phosphorylation	GO:0004672//GO:0005524	protein kinase activity//ATP binding	--	--	--	--
Cluster-31803.103139	137.29	2311.76	-4.0737	6.11e-15	1044	552826130	XP_005846961.1	534	2.4e-52	expressed protein [Chlorella variabilis]>gi|307106614|gb|EFN54859.1| expressed protein [Chlorella variabilis]	--	--	--	--	--	--	--	--	--	--	--	--	--	--	--	--	--	--	--	--	--	--	--
Cluster-31803.11455	17.2938	681.225	-5.2998	6.11e-15	434	--	--	--	--	--	--	--	--	--	--	--	--	--	--	--	--	--	--	--	--	--	--	--	--	--	--	--	--
Cluster-31803.7980	5548.77	112.975	5.6181	7.98e-15	3205	552828860	XP_005847566.1	3658	0	hypothetical protein CHLNCDRAFT_133810 [Chlorella variabilis]>gi|307107221|gb|EFN55464.1| hypothetical protein CHLNCDRAFT_133810 [Chlorella variabilis]			732	0		--	--	--	--	A5H0J2	1733	9.5e-192	Urea amidolyase OS=Lachancea kluyveri GN=DUR1,2 PE=3 SV=1	PF11722//PF08686	CCCH zinc finger in TRM13 protein//PLAC (protease and lacunin) domain	GO:0006633//GO:0000413//GO:0006457	fatty acid biosynthetic process//protein peptidyl-prolyl isomerization//protein folding	GO:0005524//GO:0008168//GO:0004075//GO:0046872//GO:0003755//GO:0008233	ATP binding//methyltransferase activity//biotin carboxylase activity//metal ion binding//peptidyl-prolyl cis-trans isomerase activity//peptidase activity	GO:0009343	biotin carboxylase complex	KOG0238	3-Methylcrotonyl-CoA carboxylase, biotin-containing subunit/Propionyl-CoA carboxylase, alpha chain/Acetyl-CoA carboxylase, biotin carboxylase subunit
Cluster-31803.11914	16.8992	658.815	-5.2848	1.1e-14	636	--	--	--	--	--	--	--	--	--	--	--	--	--	--	--	--	--	--	PF03811	InsA N-terminal domain	GO:0006313	transposition, DNA-mediated	--	--	--	--	--	--
Cluster-31803.12005	114.177	1992.76	-4.1254	1.27e-14	1366	--	--	--	--	--	--	--	--	--	--	--	--	--	--	--	--	--	--	--	--	--	--	--	--	--	--	--	--
Cluster-31803.79480	1437.48	17685.5	-3.621	1.55e-14	847	552835436	XP_005848972.1	728	6.2e-75	hypothetical protein CHLNCDRAFT_30702 [Chlorella variabilis]>gi|307108630|gb|EFN56870.1| hypothetical protein CHLNCDRAFT_30702 [Chlorella variabilis]			89	1.99e-36		K03809	wrbA	NAD(P)H dehydrogenase (quinone)	http://www.genome.jp/dbget-bin/www_bget?ko:K03809	Q6NQE2	618	4.9e-63	Probable NAD(P)H dehydrogenase (quinone) FQR1-like 1 OS=Arabidopsis thaliana GN=At4g27270 PE=2 SV=1	PF03358	NADPH-dependent FMN reductase	GO:0055114//GO:0045892	oxidation-reduction process//negative regulation of transcription, DNA-templated	GO:0010181//GO:0016491	FMN binding//oxidoreductase activity	--	--	KOG3135	1,4-benzoquinone reductase-like; Trp repressor binding protein-like/protoplast-secreted protein
Cluster-31803.100329	3.57787	390.192	-6.7689	1.62e-14	1199	552816917	XP_005844808.1	540	5.5e-53	hypothetical protein CHLNCDRAFT_54365 [Chlorella variabilis]>gi|307104452|gb|EFN52706.1| hypothetical protein CHLNCDRAFT_54365 [Chlorella variabilis]	--	--	--	--	--	--	--	--	--	--	--	--	--	--	--	--	--	--	--	--	--	--	--
Cluster-31803.14499	315.716	0	Inf	1.62e-14	7051	552812012	XP_005843614.1	890	8.5e-93	hypothetical protein CHLNCDRAFT_59225 [Chlorella variabilis]>gi|307103250|gb|EFN51512.1| hypothetical protein CHLNCDRAFT_59225 [Chlorella variabilis]			218	3.35e-107		K09015	sufD	Fe-S cluster assembly protein SufD	http://www.genome.jp/dbget-bin/www_bget?ko:K09015	Q9LQK7	553	1.4e-54	Protein ABCI7, chloroplastic OS=Arabidopsis thaliana GN=ABCI7 PE=1 SV=1	PF07649//PF01458//PF09317//PF05173	C1-like domain//Uncharacterized protein family (UPF0051)//Domain of unknown function (DUF1974)//Dihydrodipicolinate reductase, C-terminus	GO:0009089//GO:0009085//GO:0006118//GO:0033539//GO:0055114//GO:0016226	lysine biosynthetic process via diaminopimelate//lysine biosynthetic process//obsolete electron transport//fatty acid beta-oxidation using acyl-CoA dehydrogenase//oxidation-reduction process//iron-sulfur cluster assembly	GO:0047134//GO:0008839//GO:0003995	protein-disulfide reductase activity//4-hydroxy-tetrahydrodipicolinate reductase//acyl-CoA dehydrogenase activity	--	--	--	--
Cluster-31803.52009	2062	119.777	4.1056	1.83e-14	5448	552817711	XP_005845016.1	4543	0	hypothetical protein CHLNCDRAFT_58775 [Chlorella variabilis]>gi|307104661|gb|EFN52914.1| hypothetical protein CHLNCDRAFT_58775 [Chlorella variabilis]			792	0		--	--	--	--	O15439	1413	2.1e-154	Multidrug resistance-associated protein 4 OS=Homo sapiens GN=ABCC4 PE=1 SV=3	PF01926//PF00664//PF01580//PF13304//PF05049//PF06414//PF08477//PF04548//PF05472//PF00005//PF04272//PF03193	50S ribosome-binding GTPase//ABC transporter transmembrane region//FtsK/SpoIIIE family//AAA domain, putative AbiEii toxin, Type IV TA system//Interferon-inducible GTPase (IIGP)//Zeta toxin//Ras of Complex, Roc, domain of DAPkinase//AIG1 family//DNA replication terminus site-binding protein (Ter protein)//ABC transporter//Phospholamban//Protein of unknown function, DUF258	GO:0009987//GO:0006810//GO:0006816//GO:0006274//GO:0007264//GO:0055085	cellular process//transport//calcium ion transport//DNA replication termination//small GTPase mediated signal transduction//transmembrane transport	GO:0016887//GO:0016301//GO:0005525//GO:0042626//GO:0005246//GO:0042030//GO:0000166//GO:0003677//GO:0005524//GO:0003924	ATPase activity//kinase activity//GTP binding//ATPase activity, coupled to transmembrane movement of substances//calcium channel regulator activity//ATPase inhibitor activity//nucleotide binding//DNA binding//ATP binding//GTPase activity	GO:0005737//GO:0016021//GO:0016020	cytoplasm//integral component of membrane//membrane	--	--
Cluster-31803.34470	0	252.99	#NAME?	1.93e-14	3239	633911031	KDD75482.1	915	4.9e-96	M48 peptidase [Helicosporidium sp. ATCC 50920]			57	4.84e-18		--	--	--	--	Q9P7G4	401	2.7e-37	Mitochondrial metalloendopeptidase OMA1 OS=Schizosaccharomyces pombe (strain 972 / ATCC 24843) GN=oma1 PE=3 SV=1	PF01435//PF03824//PF00026	Peptidase family M48//High-affinity nickel-transport protein//Eukaryotic aspartyl protease	GO:0006508//GO:0035444//GO:0015675	proteolysis//nickel cation transmembrane transport//nickel cation transport	GO:0004190//GO:0015099//GO:0046872//GO:0004222	aspartic-type endopeptidase activity//nickel cation transmembrane transporter activity//metal ion binding//metalloendopeptidase activity	GO:0016021	integral component of membrane	KOG2661	Peptidase family M48
Cluster-31803.103901	7.56	481.293	-5.9924	2.17e-14	330	--	--	--	--	--	--	--	--	--	--	--	--	--	--	--	--	--	--	--	--	--	--	--	--	--	--	--	--
Cluster-31803.99858	7.47285	468.829	-5.9713	2.24e-14	1098	--	--	--	--	--	--	--	--	--	--	--	--	--	--	--	--	--	--	PF00320//PF00873	GATA zinc finger//AcrB/AcrD/AcrF family	GO:0006355//GO:0006810	regulation of transcription, DNA-templated//transport	GO:0008270//GO:0043565//GO:0005215//GO:0003700	zinc ion binding//sequence-specific DNA binding//transporter activity//transcription factor activity, sequence-specific DNA binding	GO:0016020//GO:0005667	membrane//transcription factor complex	--	--
Cluster-31803.104180	194.662	2912.09	-3.903	2.68e-14	1666	586651640	XP_006829295.1	816	7.6e-85	PREDICTED: metal transporter Nramp3 [Amborella trichopoda]>gi|548834274|gb|ERM96711.1| hypothetical protein AMTR_s00001p00273040 [Amborella trichopoda]	--	--	--	--	--	K12347	SLC11A, NRAMP	natural resistance-associated macrophage protein	http://www.genome.jp/dbget-bin/www_bget?ko:K12347	Q869V1	830	2.5e-87	Metal transporter nramp1 homolog OS=Dictyostelium discoideum GN=nramp1 PE=2 SV=1	PF01566	Natural resistance-associated macrophage protein	GO:0006810	transport	GO:0005215	transporter activity	GO:0016020	membrane	KOG1291	Mn2+ and Fe2+ transporters of the NRAMP family
Cluster-31803.66989	309.093	0	Inf	2.86e-14	6044	552836982	XP_005849264.1	687	2.5e-69	hypothetical protein CHLNCDRAFT_51231 [Chlorella variabilis]>gi|307108923|gb|EFN57162.1| hypothetical protein CHLNCDRAFT_51231 [Chlorella variabilis]	--	--	--	--	--	--	--	--	--	Q93YW0	218	8.5e-16	Protein EXECUTER 1, chloroplastic OS=Arabidopsis thaliana GN=EX1 PE=1 SV=1	PF02151	UvrB/uvrC motif	--	--	GO:0005515	protein binding	--	--	--	--
Cluster-31803.72458	865.749	25.923	5.0616	3.13e-14	4684	552838932	XP_005849686.1	604	8.2e-60	hypothetical protein CHLNCDRAFT_16942, partial [Chlorella variabilis]>gi|307109346|gb|EFN57584.1| hypothetical protein CHLNCDRAFT_16942, partial [Chlorella variabilis]	--	--	--	--	--	--	--	--	--	Q9LU60	446	2.4e-42	RNA pseudouridine synthase 7 OS=Arabidopsis thaliana GN=At5g51140 PE=2 SV=1	PF06810//PF04769//PF00849	Phage minor structural protein GP20//Mating-type protein MAT alpha 1 HMG-box//RNA pseudouridylate synthase	GO:0001522//GO:0045895//GO:0009451//GO:0007531	pseudouridine synthesis//positive regulation of mating-type specific transcription, DNA-templated//RNA modification//mating type determination	GO:0009982//GO:0003723//GO:0008301//GO:0005198	pseudouridine synthase activity//RNA binding//DNA binding, bending//structural molecule activity	GO:0005634	nucleus	KOG1919	RNA pseudouridylate synthases
Cluster-31803.93514	1015.61	12175.7	-3.5836	3.38e-14	2364	552846811	XP_005851708.1	443	1.9e-41	hypothetical protein CHLNCDRAFT_133021 [Chlorella variabilis]>gi|307111372|gb|EFN59606.1| hypothetical protein CHLNCDRAFT_133021 [Chlorella variabilis]	--	--	--	--	--	--	--	--	--	A2ASQ1	207	6.3e-15	Agrin OS=Mus musculus GN=Agrn PE=1 SV=1	PF05353//PF07648//PF00050	Delta Atracotoxin//Kazal-type serine protease inhibitor domain//Kazal-type serine protease inhibitor domain	GO:0009405//GO:0006810	pathogenesis//transport	GO:0005515//GO:0019871	protein binding//sodium channel inhibitor activity	GO:0005576	extracellular region	--	--
Cluster-31803.22144	10.0606	514.979	-5.6777	3.39e-14	328	--	--	--	--	--	--	--	--	--	--	--	--	--	--	--	--	--	--	--	--	--	--	--	--	--	--	--	--
Cluster-31803.100524	234.154	3325.92	-3.8282	3.47e-14	2658	552838076	XP_005849499.1	805	2.3e-83	hypothetical protein CHLNCDRAFT_142819 [Chlorella variabilis]>gi|307109159|gb|EFN57397.1| hypothetical protein CHLNCDRAFT_142819 [Chlorella variabilis]	--	--	--	--	--	K13806	DAGL	sn1-specific diacylglycerol lipase	http://www.genome.jp/dbget-bin/www_bget?ko:K13806	--	--	--	--	PF12906//PF02701//PF01764	RING-variant domain//Dof domain, zinc finger//Lipase (class 3)	GO:0006629//GO:0006355	lipid metabolic process//regulation of transcription, DNA-templated	GO:0008270//GO:0003677	zinc ion binding//DNA binding	--	--	--	--
Cluster-31803.42263	52.431	1129.04	-4.4285	3.83e-14	4618	552810423	XP_005843200.1	878	1.4e-91	hypothetical protein CHLNCDRAFT_141423 [Chlorella variabilis]>gi|307102831|gb|EFN51098.1| hypothetical protein CHLNCDRAFT_141423 [Chlorella variabilis]			128	2.35e-57		K00326	E1.6.2.2	cytochrome-b5 reductase	http://www.genome.jp/dbget-bin/www_bget?ko:K00326	Q9ZNT1	685	4.6e-70	NADH--cytochrome b5 reductase 1 OS=Arabidopsis thaliana GN=CBR1 PE=1 SV=1	PF00148//PF08030//PF00175//PF00106//PF01213//PF13241	Nitrogenase component 1 type Oxidoreductase//Ferric reductase NAD binding domain//Oxidoreductase NAD-binding domain//short chain dehydrogenase//Adenylate cyclase associated (CAP) N terminal//Putative NAD(P)-binding	GO:0008152//GO:0007010//GO:0006779//GO:0055114//GO:0019354	metabolic process//cytoskeleton organization//porphyrin-containing compound biosynthetic process//oxidation-reduction process//siroheme biosynthetic process	GO:0003779//GO:0043115//GO:0016491	actin binding//precorrin-2 dehydrogenase activity//oxidoreductase activity	--	--	KOG0534	NADH-cytochrome b-5 reductase
Cluster-31803.69973	150.396	2371.68	-3.9791	4.04e-14	291	552809140	XP_005842870.1	204	1.2e-14	hypothetical protein CHLNCDRAFT_55572 [Chlorella variabilis]>gi|307102485|gb|EFN50758.1| hypothetical protein CHLNCDRAFT_55572 [Chlorella variabilis]	--	--	--	--	--	--	--	--	--	--	--	--	--	PF00020//PF01607//PF07562	TNFR/NGFR cysteine-rich region//Chitin binding Peritrophin-A domain//Nine Cysteines Domain of family 3 GPCR	GO:0006030//GO:0007186	chitin metabolic process//G-protein coupled receptor signaling pathway	GO:0005515//GO:0008061//GO:0004930	protein binding//chitin binding//G-protein coupled receptor activity	GO:0005576	extracellular region	--	--
Cluster-31803.100647	11.6971	976.169	-6.3829	4.99e-14	5540	552837389	XP_005849350.1	1065	3.4e-113	expressed protein [Chlorella variabilis]>gi|307109009|gb|EFN57248.1| expressed protein [Chlorella variabilis]			211	2.05e-103		--	--	--	--	--	--	--	--	PF06331//PF12297//PF17001//PF13851//PF05970	Transcription factor TFIIH complex subunit Tfb5//Ellis van Creveld protein 2 like protein//Type III secretion basal body protein I, YscI, HrpB, PscI//Growth-arrest specific micro-tubule binding//PIF1-like helicase	GO:0048870//GO:0007224//GO:0006355//GO:0009306//GO:0000723//GO:0006281//GO:0006289	cell motility//smoothened signaling pathway//regulation of transcription, DNA-templated//protein secretion//telomere maintenance//DNA repair//nucleotide-excision repair	GO:0003678	DNA helicase activity	GO:0000439//GO:0031514//GO:0005657	core TFIIH complex//motile cilium//replication fork	--	--
Cluster-31803.45930	520.904	8.48027	5.9408	5.61e-14	287	--	--	--	--	--	--	--	--	--	--	--	--	--	--	--	--	--	--	--	--	--	--	--	--	--	--	--	--
Cluster-31803.14740	86.9363	1734.73	-4.3186	6.11e-14	553	--	--	--	--	--	--	--	--	--	--	--	--	--	--	--	--	--	--	--	--	--	--	--	--	--	--	--	--
Cluster-31803.103633	10.7433	962.296	-6.485	6.72e-14	2421	552841747	XP_005850391.1	692	2.6e-70	hypothetical protein CHLNCDRAFT_142269 [Chlorella variabilis]>gi|307110052|gb|EFN58289.1| hypothetical protein CHLNCDRAFT_142269 [Chlorella variabilis]	--	--	--	--	--	K01366	CTSH	cathepsin H	http://www.genome.jp/dbget-bin/www_bget?ko:K01366	Q24940	379	7.3e-35	Cathepsin L-like proteinase OS=Fasciola hepatica GN=Cat-1 PE=1 SV=1	PF03051//PF00112	Peptidase C1-like family//Papain family cysteine protease	GO:0006508	proteolysis	GO:0008234//GO:0004197	cysteine-type peptidase activity//cysteine-type endopeptidase activity	--	--	--	--
Cluster-31803.59106	0	239.158	#NAME?	6.75e-14	2298	761973200	KIZ03487.1	503	2.1e-48	putative pyridoxamine 5'-phosphate oxidase [Monoraphidium neglectum]	--	--	--	--	--	--	--	--	--	--	--	--	--	PF01243//PF02988	Pyridoxamine 5'-phosphate oxidase//Phospholipase A2 inhibitor	GO:0008615//GO:0055114	pyridoxine biosynthetic process//oxidation-reduction process	GO:0004733//GO:0010181//GO:0004859	pyridoxamine-phosphate oxidase activity//FMN binding//phospholipase inhibitor activity	GO:0005576	extracellular region	--	--
Cluster-31803.99845	359.563	4636.72	-3.6888	7.09e-14	1144	--	--	--	--	--	--	--	--	--	--	--	--	--	--	--	--	--	--	--	--	--	--	--	--	--	--	--	--
Cluster-31803.42544	0	2951.17	#NAME?	7.7e-14	3194	551677422	XP_005841464.1	223	8.4e-16	hypothetical protein GUITHDRAFT_63622 [Guillardia theta CCMP2712]>gi|428185632|gb|EKX54484.1| hypothetical protein GUITHDRAFT_63622 [Guillardia theta CCMP2712]	--	--	--	--	--	--	--	--	--	Q9U489	195	2.1e-13	Protein lin-41 OS=Caenorhabditis elegans GN=lin-41 PE=1 SV=1	PF00085//PF01436	Thioredoxin//NHL repeat	GO:0045454	cell redox homeostasis	GO:0005515	protein binding	--	--	KOG2177	Predicted E3 ubiquitin ligase
Cluster-31803.53369	9.49417	1064.98	-6.8096	8.12e-14	8309	552844909	XP_005851207.1	1541	3.2e-168	hypothetical protein CHLNCDRAFT_137893 [Chlorella variabilis]>gi|307110870|gb|EFN59105.1| hypothetical protein CHLNCDRAFT_137893 [Chlorella variabilis]			546	0		--	--	--	--	Q03441	377	4.3e-34	Sporulation protein RMD1 OS=Saccharomyces cerevisiae (strain ATCC 204508 / S288c) GN=RMD1 PE=1 SV=1	PF15966	F-box	--	--	GO:0005515	protein binding	--	--	KOG2861	Uncharacterized conserved protein
Cluster-31803.65669	515.883	6498.77	-3.655	8.12e-14	1301	--	--	--	--	--	--	--	--	--	--	--	--	--	--	--	--	--	--	--	--	--	--	--	--	--	--	--	--
Cluster-31803.105370	14.3502	848.422	-5.8856	8.21e-14	1573	--	--	--	--	--	--	--	--	--	--	--	--	--	--	--	--	--	--	--	--	--	--	--	--	--	--	--	--
Cluster-31803.11814	64.4161	2148.92	-5.06	8.25e-14	1027	552841329	XP_005850277.1	450	1.3e-42	hypothetical protein CHLNCDRAFT_142000 [Chlorella variabilis]>gi|307109938|gb|EFN58175.1| hypothetical protein CHLNCDRAFT_142000 [Chlorella variabilis]	--	--	--	--	--	K00799	GST, gst	glutathione S-transferase	http://www.genome.jp/dbget-bin/www_bget?ko:K00799	P46426	228	1e-17	Glutathione S-transferase OS=Dirofilaria immitis PE=2 SV=1	PF02798	Glutathione S-transferase, N-terminal domain	--	--	GO:0005515	protein binding	--	--	--	--
Cluster-31803.103353	129.481	2004.43	-3.9524	1.03e-13	390	--	--	--	--	--	--	--	--	--	--	--	--	--	--	--	--	--	--	--	--	--	--	--	--	--	--	--	--
Cluster-31803.68195	362.333	1.76748	7.6795	1.11e-13	1456	552812557	XP_005843731.1	835	4.2e-87	hypothetical protein CHLNCDRAFT_140051 [Chlorella variabilis]>gi|307103368|gb|EFN51629.1| hypothetical protein CHLNCDRAFT_140051 [Chlorella variabilis]			309	1.76e-158		--	--	--	--	--	--	--	--	PF02985//PF00514	HEAT repeat//Armadillo/beta-catenin-like repeat	--	--	GO:0005515	protein binding	--	--	--	--
Cluster-31803.61919	0	235.266	#NAME?	1.11e-13	1633	168005331	XP_001755364.1	148	2.1e-07	predicted protein [Physcomitrella patens]>gi|162693492|gb|EDQ79844.1| predicted protein [Physcomitrella patens]	--	--	--	--	--	--	--	--	--	P32260	144	8.7e-08	Cysteine synthase, chloroplastic/chromoplastic OS=Spinacia oleracea GN=CYSK PE=1 SV=2	--	--	--	--	--	--	--	--	--	--
Cluster-31803.74322	157.012	4199.11	-4.7411	1.32e-13	918	552840409	XP_005850037.1	613	1.4e-61	expressed protein [Chlorella variabilis]>gi|307109698|gb|EFN57935.1| expressed protein [Chlorella variabilis]	--	--	--	--	--	--	--	--	--	--	--	--	--	PF01408//PF02826//PF02558//PF03435//PF03446	Oxidoreductase family, NAD-binding Rossmann fold//D-isomer specific 2-hydroxyacid dehydrogenase, NAD binding domain//Ketopantoate reductase PanE/ApbA//Saccharopine dehydrogenase NADP binding domain//NAD binding domain of 6-phosphogluconate dehydrogenase	GO:0006098//GO:0055114//GO:0019521//GO:0015940	pentose-phosphate shunt//oxidation-reduction process//D-gluconate metabolic process//pantothenate biosynthetic process	GO:0008677//GO:0051287//GO:0000166//GO:0016491//GO:0004616	2-dehydropantoate 2-reductase activity//NAD binding//nucleotide binding//oxidoreductase activity//phosphogluconate dehydrogenase (decarboxylating) activity	--	--	--	--
Cluster-31803.92356	516.055	6145.98	-3.574	1.68e-13	1672	552826130	XP_005846961.1	624	1.4e-62	expressed protein [Chlorella variabilis]>gi|307106614|gb|EFN54859.1| expressed protein [Chlorella variabilis]	--	--	--	--	--	--	--	--	--	--	--	--	--	PF10462	Peptidase M66	--	--	GO:0004222	metalloendopeptidase activity	--	--	--	--
Cluster-31803.46373	2463.3	169.673	3.8598	1.71e-13	1254	552830447	XP_005847906.1	1725	2.3e-190	hypothetical protein CHLNCDRAFT_56139 [Chlorella variabilis]>gi|307107562|gb|EFN55804.1| hypothetical protein CHLNCDRAFT_56139 [Chlorella variabilis]			579	0		K01539	ATP1A	sodium/potassium-transporting ATPase subunit alpha	http://www.genome.jp/dbget-bin/www_bget?ko:K01539	P06686	756	7.3e-79	Sodium/potassium-transporting ATPase subunit alpha-2 OS=Rattus norvegicus GN=Atp1a2 PE=1 SV=1	--	--	GO:0006812//GO:0006754	cation transport//ATP biosynthetic process	GO:0015662//GO:0046872//GO:0005524	ATPase activity, coupled to transmembrane movement of ions, phosphorylative mechanism//metal ion binding//ATP binding	GO:0016021	integral component of membrane	KOG0203	Na+/K+ ATPase, alpha subunit
Cluster-31803.80032	188.702	2623.71	-3.7974	1.9e-13	340	--	--	--	--	--	--	--	--	--	--	--	--	--	--	--	--	--	--	PF02069	Prokaryotic metallothionein	--	--	GO:0046872	metal ion binding	--	--	--	--
Cluster-31803.54764	392.539	4803.31	-3.6131	2.13e-13	1701	552824477	XP_005846602.1	605	2.3e-60	hypothetical protein CHLNCDRAFT_52961 [Chlorella variabilis]>gi|307106254|gb|EFN54500.1| hypothetical protein CHLNCDRAFT_52961 [Chlorella variabilis]	--	--	--	--	--	--	--	--	--	--	--	--	--	--	--	--	--	--	--	--	--	--	--
Cluster-31803.105067	0	229.046	#NAME?	2.33e-13	1966	552846371	XP_005851603.1	1311	3.6e-142	hypothetical protein CHLNCDRAFT_138133 [Chlorella variabilis]>gi|307111266|gb|EFN59501.1| hypothetical protein CHLNCDRAFT_138133 [Chlorella variabilis]			57	2.91e-18		--	--	--	--	Q38967	584	1e-58	Amino acid permease 2 OS=Arabidopsis thaliana GN=AAP2 PE=1 SV=1	PF03222	Tryptophan/tyrosine permease family	GO:0003333	amino acid transmembrane transport	--	--	--	--	--	--
Cluster-31803.103191	1421.11	24676.5	-4.118	2.43e-13	374	--	--	--	--	--	--	--	--	--	--	--	--	--	--	--	--	--	--	--	--	--	--	--	--	--	--	--	--
Cluster-31803.103575	64.5008	1199.56	-4.217	2.43e-13	962	552843671	XP_005850898.1	764	4.7e-79	hypothetical protein CHLNCDRAFT_140580 [Chlorella variabilis]>gi|307110560|gb|EFN58796.1| hypothetical protein CHLNCDRAFT_140580 [Chlorella variabilis]	--	--	--	--	--	--	--	--	--	--	--	--	--	PF01323//PF10620	DSBA-like thioredoxin domain//Phosphoribosyl-dephospho-CoA transferase MdcG	GO:0006118	obsolete electron transport	GO:0016779//GO:0015035	nucleotidyltransferase activity//protein disulfide oxidoreductase activity	--	--	--	--
Cluster-31803.99479	0	226.679	#NAME?	2.53e-13	3336	552817063	XP_005844839.1	444	2.1e-41	hypothetical protein CHLNCDRAFT_138305 [Chlorella variabilis]>gi|307104484|gb|EFN52737.1| hypothetical protein CHLNCDRAFT_138305 [Chlorella variabilis]	--	--	--	--	--	--	--	--	--	--	--	--	--	PF01562//PF05887//PF07465	Reprolysin family propeptide//Procyclic acidic repetitive protein (PARP)//Photosystem I protein M (PsaM)	GO:0015979//GO:0006508	photosynthesis//proteolysis	GO:0008270//GO:0004222	zinc ion binding//metalloendopeptidase activity	GO:0016020	membrane	--	--
Cluster-31803.41018	143.207	2950.13	-4.3646	3.04e-13	3937	552816508	XP_005844704.1	797	2.9e-82	hypothetical protein CHLNCDRAFT_26561, partial [Chlorella variabilis]>gi|307104348|gb|EFN52602.1| hypothetical protein CHLNCDRAFT_26561, partial [Chlorella variabilis]	--	--	--	--	--	K12386	CTNS	cystinosin	http://www.genome.jp/dbget-bin/www_bget?ko:K12386	Q9VCR7	420	2.1e-39	Cystinosin homolog OS=Drosophila melanogaster GN=CG17119 PE=1 SV=2	PF05374	Mu-Conotoxin	GO:0009405//GO:0006810	pathogenesis//transport	GO:0019871	sodium channel inhibitor activity	GO:0005576	extracellular region	KOG3145	Cystine transporter Cystinosin
Cluster-31803.77001	0	226.1	#NAME?	3.32e-13	7923	552813375	XP_005843936.1	2384	5.5e-266	hypothetical protein CHLNCDRAFT_37165 [Chlorella variabilis]>gi|307103575|gb|EFN51834.1| hypothetical protein CHLNCDRAFT_37165 [Chlorella variabilis]			299	3.54e-152		K01008	selD, SEPHS	selenide, water dikinase	http://www.genome.jp/dbget-bin/www_bget?ko:K01008	A1APP9	418	7.2e-39	Selenide, water dikinase OS=Pelobacter propionicus (strain DSM 2379) GN=selD PE=3 SV=1	PF00070//PF15894//PF07808//PF07992//PF02576//PF01694//PF01213//PF07496	Pyridine nucleotide-disulphide oxidoreductase//Inhibitor of glucose uptake transporter SgrT//RED-like protein N-terminal region//Pyridine nucleotide-disulphide oxidoreductase//Putative ribosome maturation factor RimP//Rhomboid family//Adenylate cyclase associated (CAP) N terminal//CW-type Zinc Finger	GO:0007010//GO:0046325//GO:0055114//GO:0042274	cytoskeleton organization//negative regulation of glucose import//oxidation-reduction process//ribosomal small subunit biogenesis	GO:0003779//GO:0008270//GO:0016491//GO:0004252//GO:0003824	actin binding//zinc ion binding//oxidoreductase activity//serine-type endopeptidase activity//catalytic activity	GO:0005634//GO:0016021	nucleus//integral component of membrane	KOG3939	Selenophosphate synthetase
Cluster-31803.32110	77.9094	1349.31	-4.1143	3.49e-13	5291	552837389	XP_005849350.1	1939	1.5e-214	expressed protein [Chlorella variabilis]>gi|307109009|gb|EFN57248.1| expressed protein [Chlorella variabilis]			308	2.34e-157		--	--	--	--	--	--	--	--	PF05637//PF05970//PF00962//PF17001//PF06331	galactosyl transferase GMA12/MNN10 family//PIF1-like helicase//Adenosine/AMP deaminase//Type III secretion basal body protein I, YscI, HrpB, PscI//Transcription factor TFIIH complex subunit Tfb5	GO:0009306//GO:0006281//GO:0000723//GO:0006289//GO:0006355	protein secretion//DNA repair//telomere maintenance//nucleotide-excision repair//regulation of transcription, DNA-templated	GO:0003678//GO:0016757//GO:0019239	DNA helicase activity//transferase activity, transferring glycosyl groups//deaminase activity	GO:0005657//GO:0016021//GO:0000439	replication fork//integral component of membrane//core TFIIH complex	--	--
Cluster-31803.96748	534.799	6323.5	-3.5637	4.11e-13	3172	--	--	--	--	--	--	--	--	--	--	--	--	--	--	--	--	--	--	PF09328	Domain of unknown function (DUF1984)	GO:0046938//GO:0010038	phytochelatin biosynthetic process//response to metal ion	GO:0046872//GO:0016756	metal ion binding//glutathione gamma-glutamylcysteinyltransferase activity	--	--	--	--
Cluster-31803.48780	277.967	0	Inf	4.24e-13	3852	633908065	KDD73942.1	1149	4.3e-123	ribose phosphate pyrophosphokinase [Helicosporidium sp. ATCC 50920]			562	0		K00948	PRPS, prsA	ribose-phosphate pyrophosphokinase	http://www.genome.jp/dbget-bin/www_bget?ko:K00948	Q9XG98	1117	3.1e-120	Ribose-phosphate pyrophosphokinase 1 OS=Spinacia oleracea GN=PRS1 PE=2 SV=1	PF00213//PF14572//PF00156	ATP synthase delta (OSCP) subunit//Phosphoribosyl synthetase-associated domain//Phosphoribosyl transferase domain	GO:0009165//GO:0006144//GO:0009116//GO:0006098//GO:0015986	nucleotide biosynthetic process//purine nucleobase metabolic process//nucleoside metabolic process//pentose-phosphate shunt//ATP synthesis coupled proton transport	GO:0046933//GO:0000287//GO:0004749	proton-transporting ATP synthase activity, rotational mechanism//magnesium ion binding//ribose phosphate diphosphokinase activity	GO:0045259	proton-transporting ATP synthase complex	KOG1448	Ribose-phosphate pyrophosphokinase
Cluster-31803.14489	25.4493	700.735	-4.7832	4.6e-13	7236	552812012	XP_005843614.1	472	2.6e-44	hypothetical protein CHLNCDRAFT_59225 [Chlorella variabilis]>gi|307103250|gb|EFN51512.1| hypothetical protein CHLNCDRAFT_59225 [Chlorella variabilis]			117	4.81e-51		K09015	sufD	Fe-S cluster assembly protein SufD	http://www.genome.jp/dbget-bin/www_bget?ko:K09015	Q9LQK7	301	2.4e-25	Protein ABCI7, chloroplastic OS=Arabidopsis thaliana GN=ABCI7 PE=1 SV=1	PF09317//PF07649//PF01458	Domain of unknown function (DUF1974)//C1-like domain//Uncharacterized protein family (UPF0051)	GO:0033539//GO:0055114//GO:0016226//GO:0006118	fatty acid beta-oxidation using acyl-CoA dehydrogenase//oxidation-reduction process//iron-sulfur cluster assembly//obsolete electron transport	GO:0047134//GO:0003995	protein-disulfide reductase activity//acyl-CoA dehydrogenase activity	--	--	--	--
Cluster-31803.21918	113.349	1720.55	-3.924	4.71e-13	845	552826130	XP_005846961.1	551	2.1e-54	expressed protein [Chlorella variabilis]>gi|307106614|gb|EFN54859.1| expressed protein [Chlorella variabilis]			95	9.19e-40		--	--	--	--	--	--	--	--	--	--	--	--	--	--	--	--	--	--
Cluster-31803.97170	0	222.826	#NAME?	4.82e-13	1176	760448815	XP_011401476.1	159	8.2e-09	Serine/threonine-protein kinase ATG1 [Auxenochlorella protothecoides]>gi|675356021|gb|KFM28461.1| Serine/threonine-protein kinase ATG1 [Auxenochlorella protothecoides]	--	--	--	--	--	--	--	--	--	--	--	--	--	PF00069//PF02166	Protein kinase domain//Androgen receptor	GO:0007165//GO:0030521//GO:0006355//GO:0006468	signal transduction//androgen receptor signaling pathway//regulation of transcription, DNA-templated//protein phosphorylation	GO:0003677//GO:0005524//GO:0004882//GO:0004672//GO:0005496	DNA binding//ATP binding//androgen receptor activity//protein kinase activity//steroid binding	GO:0005634	nucleus	--	--
Cluster-31803.62161	49.727	1006.97	-4.3399	5.03e-13	4432	552842350	XP_005850540.1	1750	1e-192	hypothetical protein CHLNCDRAFT_19800, partial [Chlorella variabilis]>gi|307110202|gb|EFN58438.1| hypothetical protein CHLNCDRAFT_19800, partial [Chlorella variabilis]			487	0		K18059	SULTR4	sulfate transporter 4	http://www.genome.jp/dbget-bin/www_bget?ko:K18059	A8J6J0	1116	4.6e-120	Proton/sulfate cotransporter 2 OS=Chlamydomonas reinhardtii GN=SULTR2 PE=2 SV=1	PF00916//PF01284	Sulfate permease family//Membrane-associating domain	GO:0055085//GO:0008272	transmembrane transport//sulfate transport	GO:0015116//GO:0008271	sulfate transmembrane transporter activity//secondary active sulfate transmembrane transporter activity	GO:0016020//GO:0016021	membrane//integral component of membrane	--	--
Cluster-31803.71010	474.639	5339.68	-3.4919	5.5e-13	1240	552833527	XP_005848550.1	547	8.8e-54	hypothetical protein CHLNCDRAFT_145091 [Chlorella variabilis]>gi|307108207|gb|EFN56448.1| hypothetical protein CHLNCDRAFT_145091 [Chlorella variabilis]	--	--	--	--	--	--	--	--	--	--	--	--	--	PF01292//PF01213	Prokaryotic cytochrome b561//Adenylate cyclase associated (CAP) N terminal	GO:0007010//GO:0006118	cytoskeleton organization//obsolete electron transport	GO:0003779//GO:0009055	actin binding//electron carrier activity	GO:0016021	integral component of membrane	--	--
Cluster-31803.19160	695.186	26.369	4.7205	5.51e-13	1907	552824703	XP_005846654.1	236	1.6e-17	expressed protein [Chlorella variabilis]>gi|307106306|gb|EFN54552.1| expressed protein [Chlorella variabilis]	--	--	--	--	--	--	--	--	--	--	--	--	--	--	--	--	--	--	--	--	--	--	--
Cluster-31803.16579	91.4268	1491.54	-4.028	5.58e-13	1276	--	--	--	--	--	--	--	--	--	--	--	--	--	--	--	--	--	--	--	--	--	--	--	--	--	--	--	--
Cluster-31803.15538	122.553	1823.45	-3.8952	5.7e-13	2423	761974959	KIZ04981.1	922	5.7e-97	alcohol dehydrogenase [Monoraphidium neglectum]			275	2.35e-139		--	--	--	--	Q9SV68	276	6.4e-23	Putative quinone-oxidoreductase homolog, chloroplastic OS=Arabidopsis thaliana GN=At4g13010 PE=2 SV=1	PF08240//PF15826	Alcohol dehydrogenase GroES-like domain//Bcl-2-binding component 3, p53 upregulated modulator of apoptosis	GO:0097193//GO:0055114//GO:0090200//GO:0043065	intrinsic apoptotic signaling pathway//oxidation-reduction process//positive regulation of release of cytochrome c from mitochondria//positive regulation of apoptotic process	--	--	GO:0005739	mitochondrion	KOG1198	Zinc-binding oxidoreductase
Cluster-31803.90237	147.339	2112.64	-3.8418	5.72e-13	1356	552827694	XP_005847283.1	965	3.3e-102	hypothetical protein CHLNCDRAFT_57961 [Chlorella variabilis]>gi|307106937|gb|EFN55181.1| hypothetical protein CHLNCDRAFT_57961 [Chlorella variabilis]	--	--	--	--	--	--	--	--	--	Q5JQD7	701	1.9e-72	Probable metal-nicotianamine transporter YSL12 OS=Oryza sativa subsp. japonica GN=YSL12 PE=2 SV=2	PF03169	OPT oligopeptide transporter protein	GO:0055085	transmembrane transport	GO:0031072//GO:0051082	heat shock protein binding//unfolded protein binding	--	--	--	--
Cluster-31803.96865	92.4629	1468.69	-3.9895	6.18e-13	1231	--	--	--	--	--	--	--	--	--	--	--	--	--	--	--	--	--	--	--	--	--	--	--	--	--	--	--	--
Cluster-31803.51358	158.298	2190.63	-3.7906	6.36e-13	346	--	--	--	--	--	--	--	--	--	--	--	--	--	--	--	--	--	--	--	--	--	--	--	--	--	--	--	--
Cluster-31803.71286	0	217.638	#NAME?	6.58e-13	2230	--	--	--	--	--	--	--	--	--	--	--	--	--	--	--	--	--	--	PF03131//PF00170//PF07716	bZIP Maf transcription factor//bZIP transcription factor//Basic region leucine zipper	GO:0006355	regulation of transcription, DNA-templated	GO:0003700//GO:0043565//GO:0003677	transcription factor activity, sequence-specific DNA binding//sequence-specific DNA binding//DNA binding	GO:0005667//GO:0005634	transcription factor complex//nucleus	--	--
Cluster-31803.47417	1291.17	71.8021	4.1685	6.6e-13	1144	552845740	XP_005851433.1	630	1.9e-63	hypothetical protein CHLNCDRAFT_56687 [Chlorella variabilis]>gi|307111096|gb|EFN59331.1| hypothetical protein CHLNCDRAFT_56687 [Chlorella variabilis]	--	--	--	--	--	--	--	--	--	--	--	--	--	--	--	--	--	--	--	--	--	--	--
Cluster-31803.27485	6986.83	71941.5	-3.3641	7.69e-13	1529	--	--	--	--	--	--	--	--	--	--	--	--	--	--	--	--	--	--	--	--	--	--	--	--	--	--	--	--
Cluster-31803.37157	1441.72	14904.5	-3.3699	7.69e-13	1047	--	--	--	--	--	--	--	--	--	--	--	--	--	--	--	--	--	--	PF03014	Structural protein 2	--	--	GO:0005198	structural molecule activity	--	--	--	--
Cluster-31803.36441	328.813	0	Inf	8.08e-13	5715	552816902	XP_005844804.1	2435	4.8e-272	hypothetical protein CHLNCDRAFT_138705 [Chlorella variabilis]>gi|307104448|gb|EFN52702.1| hypothetical protein CHLNCDRAFT_138705 [Chlorella variabilis]	--	--	--	--	--	K11886	ECM29	proteasome component ECM29	http://www.genome.jp/dbget-bin/www_bget?ko:K11886	Q6PDI5	840	6e-88	Proteasome-associated protein ECM29 homolog OS=Mus musculus GN=Ecm29 PE=1 SV=3	PF04706//PF01429//PF02985//PF00514	Dickkopf N-terminal cysteine-rich region//Methyl-CpG binding domain//HEAT repeat//Armadillo/beta-catenin-like repeat	GO:0030178//GO:0007275	negative regulation of Wnt signaling pathway//multicellular organismal development	GO:0005515//GO:0003677	protein binding//DNA binding	GO:0005576//GO:0005634	extracellular region//nucleus	KOG0915	Uncharacterized conserved protein
Cluster-31803.69741	241.424	3062.87	-3.6652	8.08e-13	5823	552828061	XP_005847382.1	1286	8.4e-139	hypothetical protein CHLNCDRAFT_35526 [Chlorella variabilis]>gi|307107036|gb|EFN55280.1| hypothetical protein CHLNCDRAFT_35526 [Chlorella variabilis]			317	2.56e-162		K08568	CTSZ	cathepsin X	http://www.genome.jp/dbget-bin/www_bget?ko:K08568	Q9UBR2	858	5e-90	Cathepsin Z OS=Homo sapiens GN=CTSZ PE=1 SV=1	PF16934//PF03051//PF12300//PF00112//PF06426	Two-component Enterococcus faecalis cytolysin (EFC)//Peptidase C1-like family//Protein of unknown function (DUF3628)//Papain family cysteine protease//Serine acetyltransferase, N-terminal	GO:0006508//GO:0006534//GO:0050830//GO:0006535//GO:0042967	proteolysis//cysteine metabolic process//defense response to Gram-positive bacterium//cysteine biosynthetic process from serine//acyl-carrier-protein biosynthetic process	GO:0004197//GO:0008234//GO:0009001//GO:0016817	cysteine-type endopeptidase activity//cysteine-type peptidase activity//serine O-acetyltransferase activity//hydrolase activity, acting on acid anhydrides	GO:0005737	cytoplasm	--	--
Cluster-31803.70271	0	215.146	#NAME?	8.09e-13	7481	552815963	XP_005844563.1	727	7.1e-74	hypothetical protein CHLNCDRAFT_58841 [Chlorella variabilis]>gi|307104206|gb|EFN52461.1| hypothetical protein CHLNCDRAFT_58841 [Chlorella variabilis]			150	2.25e-69		--	--	--	--	O61585	216	1.8e-15	Katanin p80 WD40 repeat-containing subunit B1 OS=Strongylocentrotus purpuratus GN=KATNB1 PE=1 SV=1	PF02577//PF00400	Bifunctional nuclease//WD domain, G-beta repeat	GO:0016567	protein ubiquitination	GO:0004518//GO:0005515	nuclease activity//protein binding	GO:0005634	nucleus	--	--
Cluster-31803.69091	2.87585	311.499	-6.7591	9.77e-13	491	--	--	--	--	--	--	--	--	--	--	--	--	--	--	--	--	--	--	--	--	--	--	--	--	--	--	--	--
Cluster-31803.74323	12.6581	500.918	-5.3064	9.88e-13	1218	552840409	XP_005850037.1	607	9.5e-61	expressed protein [Chlorella variabilis]>gi|307109698|gb|EFN57935.1| expressed protein [Chlorella variabilis]	--	--	--	--	--	--	--	--	--	--	--	--	--	PF03446//PF03435//PF01408	NAD binding domain of 6-phosphogluconate dehydrogenase//Saccharopine dehydrogenase NADP binding domain//Oxidoreductase family, NAD-binding Rossmann fold	GO:0055114//GO:0006098//GO:0019521	oxidation-reduction process//pentose-phosphate shunt//D-gluconate metabolic process	GO:0004616//GO:0016491	phosphogluconate dehydrogenase (decarboxylating) activity//oxidoreductase activity	--	--	--	--
Cluster-31803.81021	9.41671	446.791	-5.5682	1.01e-12	1211	552840409	XP_005850037.1	194	7.4e-13	expressed protein [Chlorella variabilis]>gi|307109698|gb|EFN57935.1| expressed protein [Chlorella variabilis]	--	--	--	--	--	--	--	--	--	--	--	--	--	--	--	--	--	GO:0000166	nucleotide binding	--	--	--	--
Cluster-31803.30959	305.966	0	Inf	1.04e-12	1746	545362765	XP_005646583.1	1322	1.7e-143	ornithine carbamoyltransferase [Coccomyxa subellipsoidea C-169]>gi|384248555|gb|EIE22039.1| ornithine carbamoyltransferase [Coccomyxa subellipsoidea C-169]			571	0		K00611	OTC, argF, argI	ornithine carbamoyltransferase	http://www.genome.jp/dbget-bin/www_bget?ko:K00611	Q43814	1137	6.7e-123	Ornithine carbamoyltransferase, chloroplastic OS=Pisum sativum GN=ARGF PE=2 SV=1	PF02729//PF14171//PF00185	Aspartate/ornithine carbamoyltransferase, carbamoyl-P binding domain//Toxin SpoIISA, type II toxin-antitoxin system//Aspartate/ornithine carbamoyltransferase, Asp/Orn binding domain	GO:0006525//GO:0006591//GO:0006520//GO:0009405//GO:0006560	arginine metabolic process//ornithine metabolic process//cellular amino acid metabolic process//pathogenesis//proline metabolic process	GO:0004585//GO:0016597//GO:0016743	ornithine carbamoyltransferase activity//amino acid binding//carboxyl- or carbamoyltransferase activity	GO:0009348//GO:0016021//GO:0005737	ornithine carbamoyltransferase complex//integral component of membrane//cytoplasm	KOG1504	Ornithine carbamoyltransferase OTC/ARG3
Cluster-31803.63897	294.281	3600.39	-3.6129	1.04e-12	4897	552827083	XP_005847166.1	1192	5.6e-128	hypothetical protein CHLNCDRAFT_35843 [Chlorella variabilis]>gi|307106819|gb|EFN55064.1| hypothetical protein CHLNCDRAFT_35843 [Chlorella variabilis]			440	0		K00472	E1.14.11.2	prolyl 4-hydroxylase	http://www.genome.jp/dbget-bin/www_bget?ko:K00472	Q8L970	726	8.6e-75	Probable prolyl 4-hydroxylase 7 OS=Arabidopsis thaliana GN=P4H7 PE=2 SV=1	PF13639//PF12678//PF01363//PF02362//PF11593//PF13640//PF14634//PF08290//PF03171//PF00097	Ring finger domain//RING-H2 zinc finger//FYVE zinc finger//B3 DNA binding domain//Mediator complex subunit 3 fungal//2OG-Fe(II) oxygenase superfamily//zinc-RING finger domain//Hepatitis core protein, putative zinc finger//2OG-Fe(II) oxygenase superfamily//Zinc finger, C3HC4 type (RING finger)	GO:0055114//GO:0006357//GO:0009405	oxidation-reduction process//regulation of transcription from RNA polymerase II promoter//pathogenesis	GO:0046872//GO:0001104//GO:0031418//GO:0005506//GO:0008270//GO:0005198//GO:0005515//GO:0016706//GO:0003677//GO:0016491	metal ion binding//RNA polymerase II transcription cofactor activity//L-ascorbic acid binding//iron ion binding//zinc ion binding//structural molecule activity//protein binding//oxidoreductase activity, acting on paired donors, with incorporation or reduction of molecular oxygen, 2-oxoglutarate as one donor, and incorporation of one atom each of oxygen into both donors//DNA binding//oxidoreductas…	GO:0016592	mediator complex	--	--
Cluster-31803.18492	2366.92	23902.1	-3.3361	1.12e-12	3224	552813964	XP_005844077.1	2346	5.7e-262	hypothetical protein CHLNCDRAFT_139472 [Chlorella variabilis]>gi|307103717|gb|EFN51975.1| hypothetical protein CHLNCDRAFT_139472 [Chlorella variabilis]	--	--	--	--	--	--	--	--	--	Q4LDE5	176	3.4e-11	Sushi, von Willebrand factor type A, EGF and pentraxin domain-containing protein 1 OS=Homo sapiens GN=SVEP1 PE=1 SV=3	PF07562	Nine Cysteines Domain of family 3 GPCR	GO:0007186	G-protein coupled receptor signaling pathway	GO:0004930	G-protein coupled receptor activity	--	--	KOG1217	Fibrillins and related proteins containing Ca2+-binding EGF-like domains
Cluster-31803.34721	2034.58	140.319	3.8579	1.14e-12	1906	552822703	XP_005846185.1	698	4.2e-71	hypothetical protein CHLNCDRAFT_136204 [Chlorella variabilis]>gi|307105835|gb|EFN54083.1| hypothetical protein CHLNCDRAFT_136204 [Chlorella variabilis]	--	--	--	--	--	--	--	--	--	--	--	--	--	PF01522//PF14750	Polysaccharide deacetylase//Integrator complex subunit 2	GO:0005975//GO:0006807	carbohydrate metabolic process//nitrogen compound metabolic process	GO:0016810	hydrolase activity, acting on carbon-nitrogen (but not peptide) bonds	GO:0032039	integrator complex	--	--
Cluster-31803.103297	0	213.881	#NAME?	1.18e-12	1193	--	--	--	--	--	--	--	--	--	--	--	--	--	--	--	--	--	--	--	--	--	--	--	--	--	--	--	--
Cluster-31803.93621	441.14	4926.48	-3.4812	1.29e-12	1403	552846811	XP_005851708.1	221	6.3e-16	hypothetical protein CHLNCDRAFT_133021 [Chlorella variabilis]>gi|307111372|gb|EFN59606.1| hypothetical protein CHLNCDRAFT_133021 [Chlorella variabilis]	--	--	--	--	--	--	--	--	--	--	--	--	--	PF00050//PF07648	Kazal-type serine protease inhibitor domain//Kazal-type serine protease inhibitor domain	--	--	GO:0005515	protein binding	--	--	--	--
Cluster-31803.46480	1.4234	269.137	-7.5629	1.35e-12	1805	552820420	XP_005845600.1	870	4.5e-91	hypothetical protein CHLNCDRAFT_136821 [Chlorella variabilis]>gi|307105248|gb|EFN53498.1| hypothetical protein CHLNCDRAFT_136821 [Chlorella variabilis]			204	5.13e-100		--	--	--	--	Q5E9H9	281	1.3e-23	Mycophenolic acid acyl-glucuronide esterase, mitochondrial OS=Bos taurus GN=ABHD10 PE=2 SV=1	PF06821//PF00326//PF02230//PF07859	Serine hydrolase//Prolyl oligopeptidase family//Phospholipase/Carboxylesterase//alpha/beta hydrolase fold	GO:0006508//GO:0008152	proteolysis//metabolic process	GO:0016787//GO:0008236	hydrolase activity//serine-type peptidase activity	--	--	--	--
Cluster-31803.7314	2043.19	7.13771	8.1611	1.41e-12	1082	545359209	XP_005645091.1	191	1.5e-12	urea active transporter-like protein [Coccomyxa subellipsoidea C-169]>gi|384247059|gb|EIE20547.1| urea active transporter-like protein [Coccomyxa subellipsoidea C-169]	--	--	--	--	--	--	--	--	--	--	--	--	--	--	--	--	--	--	--	--	--	--	--
Cluster-31803.45498	321.41	3798.87	-3.5631	1.44e-12	4388	761978089	KIZ07768.1	1241	1e-133	5,10-methylenetetrahydrofolate reductase [Monoraphidium neglectum]			499	0		K00297	metF, MTHFR	methylenetetrahydrofolate reductase (NADPH)	http://www.genome.jp/dbget-bin/www_bget?ko:K00297	Q75HE6	1024	2.1e-109	Probable methylenetetrahydrofolate reductase OS=Oryza sativa subsp. japonica GN=Os03g0815200 PE=2 SV=1	PF13180//PF02219//PF00089//PF02907//PF04055//PF00595//PF01255//PF00949//PF00822//PF00762//PF10459//PF14672	PDZ domain//Methylenetetrahydrofolate reductase//Trypsin//Hepatitis C virus NS3 protease//Radical SAM superfamily//PDZ domain (Also known as DHR or GLGF)//Putative undecaprenyl diphosphate synthase//Peptidase S7, Flavivirus NS3 serine protease//PMP-22/EMP/MP20/Claudin family//Ferrochelatase//Peptidase S46//Late cornified envelope	GO:0008544//GO:0015994//GO:0006555//GO:0046653//GO:0006508//GO:0055114//GO:0006783//GO:0019087	epidermis development//chlorophyll metabolic process//methionine metabolic process//tetrahydrofolate metabolic process//proteolysis//oxidation-reduction process//heme biosynthetic process//transformation of host cell by virus	GO:0003824//GO:0004325//GO:0016765//GO:0005524//GO:0003723//GO:0004489//GO:0008236//GO:0008239//GO:0070009//GO:0004252//GO:0051536//GO:0003724//GO:0005515	catalytic activity//ferrochelatase activity//transferase activity, transferring alkyl or aryl (other than methyl) groups//ATP binding//RNA binding//methylenetetrahydrofolate reductase (NAD(P)H) activity//serine-type peptidase activity//dipeptidyl-peptidase activity//serine-type aminopeptidase activity//serine-type endopeptidase activity//iron-sulfur cluster binding//RNA helicase activity//protein…	GO:0016021	integral component of membrane	KOG0564	5,10-methylenetetrahydrofolate reductase
Cluster-31803.41703	174.843	2293.06	-3.7131	1.47e-12	1200	760445387	XP_011399762.1	396	2.8e-36	Serine/threonine-protein kinase CTR1 [Auxenochlorella protothecoides]>gi|675354374|gb|KFM26814.1| Serine/threonine-protein kinase CTR1 [Auxenochlorella protothecoides]	--	--	--	--	--	K04424	ZAK, MLTK	sterile alpha motif and leucine zipper containing kinase AZK	http://www.genome.jp/dbget-bin/www_bget?ko:K04424	Q9FPR3	281	8.4e-24	Serine/threonine-protein kinase EDR1 OS=Arabidopsis thaliana GN=EDR1 PE=1 SV=1	PF00069//PF07714	Protein kinase domain//Protein tyrosine kinase	GO:0006468	protein phosphorylation	GO:0004672//GO:0005524	protein kinase activity//ATP binding	--	--	--	--
Cluster-31803.103517	10.966	618.709	-5.8182	1.52e-12	1286	552827748	XP_005847297.1	1137	3.5e-122	hypothetical protein CHLNCDRAFT_52565 [Chlorella variabilis]>gi|307106951|gb|EFN55195.1| hypothetical protein CHLNCDRAFT_52565 [Chlorella variabilis]			98	3.05e-41		K05894	OPR	12-oxophytodienoic acid reductase	http://www.genome.jp/dbget-bin/www_bget?ko:K05894	Q84QK0	1064	1.4e-114	12-oxophytodienoate reductase 1 OS=Oryza sativa subsp. japonica GN=OPR1 PE=2 SV=1	PF00724	NADH:flavin oxidoreductase / NADH oxidase family	GO:0055114	oxidation-reduction process	GO:0016491//GO:0010181	oxidoreductase activity//FMN binding	--	--	KOG0134	NADH:flavin oxidoreductase/12-oxophytodienoate reductase
Cluster-31803.59177	105.731	1573.54	-3.8955	1.55e-12	282	--	--	--	--	--	--	--	--	--	--	--	--	--	--	--	--	--	--	--	--	--	--	--	--	--	--	--	--
Cluster-31803.92006	17.2454	554.164	-5.006	1.56e-12	1359	552833527	XP_005848550.1	644	5.5e-65	hypothetical protein CHLNCDRAFT_145091 [Chlorella variabilis]>gi|307108207|gb|EFN56448.1| hypothetical protein CHLNCDRAFT_145091 [Chlorella variabilis]	--	--	--	--	--	--	--	--	--	--	--	--	--	PF01213	Adenylate cyclase associated (CAP) N terminal	GO:0007010	cytoskeleton organization	GO:0003779	actin binding	--	--	--	--
Cluster-31803.103782	3.65533	324.443	-6.4718	1.59e-12	1596	--	--	--	--	--			68	1.81e-24		--	--	--	--	--	--	--	--	--	--	--	--	--	--	--	--	--	--
Cluster-31803.16418	231.569	2833.71	-3.6132	1.62e-12	985	761974063	KIZ04214.1	383	7.3e-35	carboxypeptidase D [Monoraphidium neglectum]	--	--	--	--	--	K07752	CPD	carboxypeptidase D	http://www.genome.jp/dbget-bin/www_bget?ko:K07752	O75976	264	6.4e-22	Carboxypeptidase D OS=Homo sapiens GN=CPD PE=1 SV=2	PF00246	Zinc carboxypeptidase	GO:0006508	proteolysis	GO:0004181//GO:0008270	metallocarboxypeptidase activity//zinc ion binding	--	--	KOG2649	Zinc carboxypeptidase
Cluster-31803.59992	262.063	0	Inf	1.64e-12	1804	552844946	XP_005851218.1	420	6.8e-39	hypothetical protein CHLNCDRAFT_137916 [Chlorella variabilis]>gi|307110881|gb|EFN59116.1| hypothetical protein CHLNCDRAFT_137916 [Chlorella variabilis]	--	--	--	--	--	--	--	--	--	--	--	--	--	PF03266	NTPase	GO:0007154	cell communication	GO:0035091//GO:0098519	phosphatidylinositol binding//nucleotide phosphatase activity, acting on free nucleotides	--	--	--	--
Cluster-31803.88378	346.453	3975.57	-3.5204	1.98e-12	1422	552828940	XP_005847586.1	1326	4.7e-144	hypothetical protein CHLNCDRAFT_35417 [Chlorella variabilis]>gi|307107241|gb|EFN55484.1| hypothetical protein CHLNCDRAFT_35417 [Chlorella variabilis]			433	0		K06911	K06911	uncharacterized protein	http://www.genome.jp/dbget-bin/www_bget?ko:K06911	Q9SEE4	653	7.3e-67	Pirin-like protein OS=Solanum lycopersicum PE=2 SV=1	--	--	--	--	--	--	--	--	--	--
Cluster-31803.37861	10.6005	457.388	-5.4312	2.06e-12	1343	--	--	--	--	--	--	--	--	--	--	--	--	--	--	--	--	--	--	PF00703	Glycosyl hydrolases family 2	GO:0005975	carbohydrate metabolic process	GO:0004553	hydrolase activity, hydrolyzing O-glycosyl compounds	--	--	--	--
Cluster-31803.55940	0	208.975	#NAME?	2.29e-12	3756	552827003	XP_005847146.1	701	3.7e-71	hypothetical protein CHLNCDRAFT_134899 [Chlorella variabilis]>gi|307106799|gb|EFN55044.1| hypothetical protein CHLNCDRAFT_134899 [Chlorella variabilis]	--	--	--	--	--	K12854	SNRNP200, BRR2	pre-mRNA-splicing helicase BRR2	http://www.genome.jp/dbget-bin/www_bget?ko:K12854	Q588V7	381	6.6e-35	Helicase and polymerase-containing protein TEBICHI OS=Arabidopsis thaliana GN=TEB PE=2 SV=1	--	--	--	--	--	--	--	--	KOG0950	DNA polymerase theta/eta, DEAD-box superfamily
Cluster-31803.11984	16.6209	1553.95	-6.5468	2.31e-12	2681	552812277	XP_005843670.1	706	7e-72	hypothetical protein CHLNCDRAFT_140053 [Chlorella variabilis]>gi|307103307|gb|EFN51568.1| hypothetical protein CHLNCDRAFT_140053 [Chlorella variabilis]	--	--	--	--	--	--	--	--	--	--	--	--	--	PF06990//PF03567	Galactose-3-O-sulfotransferase//Sulfotransferase family	GO:0006687//GO:0009058	glycosphingolipid metabolic process//biosynthetic process	GO:0008146//GO:0001733	sulfotransferase activity//galactosylceramide sulfotransferase activity	GO:0005794//GO:0016021	Golgi apparatus//integral component of membrane	--	--
Cluster-31803.103910	0	208.318	#NAME?	2.36e-12	2872	--	--	--	--	--	--	--	--	--	--	--	--	--	--	--	--	--	--	--	--	--	--	--	--	--	--	--	--
Cluster-31803.79968	6289.63	61108.4	-3.2803	2.41e-12	337	552838242	XP_005849536.1	294	5.2e-25	hypothetical protein CHLNCDRAFT_142903 [Chlorella variabilis]>gi|307109196|gb|EFN57434.1| hypothetical protein CHLNCDRAFT_142903 [Chlorella variabilis]	--	--	--	--	--	--	--	--	--	--	--	--	--	PF04828//PF00641//PF00020//PF07562	Glutathione-dependent formaldehyde-activating enzyme//Zn-finger in Ran binding protein and others//TNFR/NGFR cysteine-rich region//Nine Cysteines Domain of family 3 GPCR	GO:0008152//GO:0007186	metabolic process//G-protein coupled receptor signaling pathway	GO:0016846//GO:0005515//GO:0008270//GO:0004930	carbon-sulfur lyase activity//protein binding//zinc ion binding//G-protein coupled receptor activity	--	--	--	--
Cluster-31803.31636	12.4548	479.687	-5.2673	2.6e-12	3388	552840784	XP_005850140.1	993	4.6e-105	hypothetical protein CHLNCDRAFT_34430 [Chlorella variabilis]>gi|307109801|gb|EFN58038.1| hypothetical protein CHLNCDRAFT_34430 [Chlorella variabilis]			389	0		K09500	CCT8	T-complex protein 1 subunit theta	http://www.genome.jp/dbget-bin/www_bget?ko:K09500	Q94K05	742	8.3e-77	T-complex protein 1 subunit theta OS=Arabidopsis thaliana GN=CCT8 PE=1 SV=1	PF00118	TCP-1/cpn60 chaperonin family	GO:0006457	protein folding	GO:0051082//GO:0005524	unfolded protein binding//ATP binding	GO:0005737	cytoplasm	KOG0362	Chaperonin complex component, TCP-1 theta subunit (CCT8)
Cluster-31803.15069	330.512	3743.45	-3.5016	2.72e-12	1268	552826130	XP_005846961.1	154	3.4e-08	expressed protein [Chlorella variabilis]>gi|307106614|gb|EFN54859.1| expressed protein [Chlorella variabilis]	--	--	--	--	--	--	--	--	--	--	--	--	--	PF10576	Iron-sulfur binding domain of endonuclease III	--	--	GO:0051539	4 iron, 4 sulfur cluster binding	--	--	--	--
Cluster-31803.11166	3.24138	311.849	-6.5881	2.73e-12	1334	552841329	XP_005850277.1	334	4.7e-29	hypothetical protein CHLNCDRAFT_142000 [Chlorella variabilis]>gi|307109938|gb|EFN58175.1| hypothetical protein CHLNCDRAFT_142000 [Chlorella variabilis]	--	--	--	--	--	K00799	GST, gst	glutathione S-transferase	http://www.genome.jp/dbget-bin/www_bget?ko:K00799	P46426	203	1e-14	Glutathione S-transferase OS=Dirofilaria immitis PE=2 SV=1	PF02798	Glutathione S-transferase, N-terminal domain	--	--	GO:0005515	protein binding	--	--	--	--
Cluster-31803.64597	19.4483	1142.1	-5.8759	2.86e-12	3436	552825715	XP_005846882.1	488	1.7e-46	hypothetical protein CHLNCDRAFT_12290, partial [Chlorella variabilis]>gi|307106535|gb|EFN54780.1| hypothetical protein CHLNCDRAFT_12290, partial [Chlorella variabilis]	--	--	--	--	--	K08360	CYB561	cytochrome b-561	http://www.genome.jp/dbget-bin/www_bget?ko:K08360	Q6DDR3	219	3.7e-16	Cytochrome b reductase 1 OS=Xenopus laevis GN=cybrd1 PE=2 SV=2	PF03188//PF01292//PF00033//PF03153	Eukaryotic cytochrome b561//Prokaryotic cytochrome b561//Cytochrome b/b6/petB//Transcription factor IIA, alpha/beta subunit	GO:0006367//GO:0006118//GO:0022904	transcription initiation from RNA polymerase II promoter//obsolete electron transport//respiratory electron transport chain	GO:0009055	electron carrier activity	GO:0016020//GO:0016021//GO:0005672	membrane//integral component of membrane//transcription factor TFIIA complex	KOG1619	Cytochrome b
Cluster-31803.58454	50.0732	12058.8	-7.9118	2.9e-12	4455	552833041	XP_005848468.1	2111	1.4e-234	hypothetical protein CHLNCDRAFT_144864 [Chlorella variabilis]>gi|307108125|gb|EFN56366.1| hypothetical protein CHLNCDRAFT_144864 [Chlorella variabilis]			405	0		K00654	SPT	serine palmitoyltransferase	http://www.genome.jp/dbget-bin/www_bget?ko:K00654	Q9LSZ9	1462	3.5e-160	Long chain base biosynthesis protein 2a OS=Arabidopsis thaliana GN=LCB2a PE=1 SV=1	PF01212//PF15324//PF00530//PF00155	Beta-eliminating lyase//Hedgehog signalling target//Scavenger receptor cysteine-rich domain//Aminotransferase class I and II	GO:0006520//GO:0007224//GO:0007165//GO:0009058	cellular amino acid metabolic process//smoothened signaling pathway//signal transduction//biosynthetic process	GO:0005044//GO:0016740//GO:0016829//GO:0030170	scavenger receptor activity//transferase activity//lyase activity//pyridoxal phosphate binding	GO:0016020	membrane	KOG1357	Serine palmitoyltransferase
Cluster-31803.104164	27.3545	672.57	-4.6198	2.93e-12	676	--	--	--	--	--	--	--	--	--	--	--	--	--	--	--	--	--	--	PF06753	Bradykinin	GO:0006950//GO:0007165	response to stress//signal transduction	GO:0005179	hormone activity	GO:0005576	extracellular region	--	--
Cluster-31803.96023	0	204.851	#NAME?	3.82e-12	3432	552819621	XP_005845453.1	351	1.3e-30	hypothetical protein CHLNCDRAFT_137085 [Chlorella variabilis]>gi|307105100|gb|EFN53351.1| hypothetical protein CHLNCDRAFT_137085 [Chlorella variabilis]	--	--	--	--	--	--	--	--	--	--	--	--	--	--	--	--	--	--	--	--	--	--	--
Cluster-31803.77875	3729.72	36088.9	-3.2744	3.88e-12	1025	552833527	XP_005848550.1	733	2e-75	hypothetical protein CHLNCDRAFT_145091 [Chlorella variabilis]>gi|307108207|gb|EFN56448.1| hypothetical protein CHLNCDRAFT_145091 [Chlorella variabilis]	--	--	--	--	--	--	--	--	--	--	--	--	--	PF01213	Adenylate cyclase associated (CAP) N terminal	GO:0007010	cytoskeleton organization	GO:0003779	actin binding	--	--	--	--
Cluster-31803.81444	390.97	4226.19	-3.4342	3.89e-12	3609	552844233	XP_005851045.1	548	2e-53	hypothetical protein CHLNCDRAFT_50489 [Chlorella variabilis]>gi|307110707|gb|EFN58943.1| hypothetical protein CHLNCDRAFT_50489 [Chlorella variabilis]	--	--	--	--	--	--	--	--	--	--	--	--	--	PF02049//PF03137	Flagellar hook-basal body complex protein FliE//Organic Anion Transporter Polypeptide (OATP) family	GO:0071973//GO:0006810	bacterial-type flagellum-dependent cell motility//transport	GO:0003774//GO:0005198//GO:0005215	motor activity//structural molecule activity//transporter activity	GO:0016020//GO:0009288	membrane//bacterial-type flagellum	--	--
Cluster-31803.14340	596.451	6028.08	-3.3372	4.3e-12	723	633905882	KDD72986.1	326	2.2e-28	hypothetical protein H632_c2659p0, partial [Helicosporidium sp. ATCC 50920]	--	--	--	--	--	--	--	--	--	--	--	--	--	PF03067	Chitin binding domain	--	--	--	--	GO:0019028	viral capsid	--	--
Cluster-31803.58058	0	833.66	#NAME?	5.11e-12	2105	552843018	XP_005850722.1	199	3.4e-13	hypothetical protein CHLNCDRAFT_19492 [Chlorella variabilis]>gi|307110384|gb|EFN58620.1| hypothetical protein CHLNCDRAFT_19492 [Chlorella variabilis]	--	--	--	--	--	--	--	--	--	Q569D5	160	1.6e-09	Selenium-binding protein 1 OS=Xenopus tropicalis GN=selenbp1 PE=2 SV=1	PF05694//PF07361//PF04977	56kDa selenium binding protein (SBP56)//Cytochrome b562//Septum formation initiator	GO:0006118//GO:0007049//GO:0022900	obsolete electron transport//cell cycle//electron transport chain	GO:0008430//GO:0009055//GO:0005506//GO:0020037	selenium binding//electron carrier activity//iron ion binding//heme binding	GO:0042597	periplasmic space	KOG0918	Selenium-binding protein
Cluster-31803.67561	173.539	2136.44	-3.6219	5.14e-12	2214	552838007	XP_005849486.1	1119	7.4e-120	hypothetical protein CHLNCDRAFT_142788 [Chlorella variabilis]>gi|307109146|gb|EFN57384.1| hypothetical protein CHLNCDRAFT_142788 [Chlorella variabilis]			153	1.42e-71		--	--	--	--	--	--	--	--	PF08926//PF07822	Domain of unknown function (DUF1908)//Neurotoxin B-IV-like protein	GO:0006468//GO:0009069//GO:0016310//GO:0009405//GO:0006810	protein phosphorylation//serine family amino acid metabolic process//phosphorylation//pathogenesis//transport	GO:0019871//GO:0004674//GO:0000287//GO:0005524//GO:0000166	sodium channel inhibitor activity//protein serine/threonine kinase activity//magnesium ion binding//ATP binding//nucleotide binding	GO:0005576	extracellular region	--	--
Cluster-31803.91615	5.46363	348.851	-5.9966	5.66e-12	3517	552826130	XP_005846961.1	683	4.3e-69	expressed protein [Chlorella variabilis]>gi|307106614|gb|EFN54859.1| expressed protein [Chlorella variabilis]	--	--	--	--	--	--	--	--	--	--	--	--	--	PF10462	Peptidase M66	--	--	GO:0004222	metalloendopeptidase activity	--	--	--	--
Cluster-31803.19049	12.1764	459.152	-5.2368	5.75e-12	3715	--	--	--	--	--	--	--	--	--	--	--	--	--	--	--	--	--	--	--	--	--	--	--	--	--	--	--	--
Cluster-31803.99983	4.02086	316.223	-6.2973	5.84e-12	4549	552812012	XP_005843614.1	501	7e-48	hypothetical protein CHLNCDRAFT_59225 [Chlorella variabilis]>gi|307103250|gb|EFN51512.1| hypothetical protein CHLNCDRAFT_59225 [Chlorella variabilis]			134	1.07e-60		K09015	sufD	Fe-S cluster assembly protein SufD	http://www.genome.jp/dbget-bin/www_bget?ko:K09015	Q9LQK7	330	6.6e-29	Protein ABCI7, chloroplastic OS=Arabidopsis thaliana GN=ABCI7 PE=1 SV=1	PF05173//PF01458	Dihydrodipicolinate reductase, C-terminus//Uncharacterized protein family (UPF0051)	GO:0009089//GO:0055114//GO:0009085//GO:0016226	lysine biosynthetic process via diaminopimelate//oxidation-reduction process//lysine biosynthetic process//iron-sulfur cluster assembly	GO:0008839	4-hydroxy-tetrahydrodipicolinate reductase	--	--	--	--
Cluster-31803.21724	453.677	10.1513	5.4819	6.8e-12	3440	760440455	XP_011397296.1	1100	1.8e-117	UV-damage endonuclease [Auxenochlorella protothecoides]>gi|675351968|gb|KFM24408.1| UV-damage endonuclease [Auxenochlorella protothecoides]			66	5.1e-23		K13281	uvsE, UVE1	UV DNA damage endonuclease	http://www.genome.jp/dbget-bin/www_bget?ko:K13281	Q10988	416	5.3e-39	UV-damage endonuclease OS=Schizosaccharomyces pombe (strain 972 / ATCC 24843) GN=uve1 PE=2 SV=1	PF12235//PF03851	Fragile X-related 1 protein core C terminal//UV-endonuclease UvdE	GO:0009411//GO:0006289	response to UV//nucleotide-excision repair	GO:0004519//GO:0003723	endonuclease activity//RNA binding	--	--	--	--
Cluster-31803.42047	246.059	0	Inf	7.33e-12	2224	552824819	XP_005846681.1	1153	8.5e-124	hypothetical protein CHLNCDRAFT_135406 [Chlorella variabilis]>gi|307106333|gb|EFN54579.1| hypothetical protein CHLNCDRAFT_135406 [Chlorella variabilis]			271	3.61e-137		K06127	COQ5	2-methoxy-6-polyprenyl-1,4-benzoquinol methylase	http://www.genome.jp/dbget-bin/www_bget?ko:K06127	Q5JNC0	729	1.7e-75	2-methoxy-6-polyprenyl-1,4-benzoquinol methylase, mitochondrial OS=Oryza sativa subsp. japonica GN=COQ5 PE=2 SV=1	PF01209//PF09297//PF08241	ubiE/COQ5 methyltransferase family//NADH pyrophosphatase zinc ribbon domain//Methyltransferase domain	GO:0008152	metabolic process	GO:0016787//GO:0046872//GO:0008168	hydrolase activity//metal ion binding//methyltransferase activity	--	--	KOG1540	Ubiquinone biosynthesis methyltransferase COQ5
Cluster-31803.103155	27.2964	648.007	-4.5692	7.41e-12	210	--	--	--	--	--	--	--	--	--	--	--	--	--	--	--	--	--	--	--	--	--	--	--	--	--	--	--	--
Cluster-31803.12429	105.087	1455.63	-3.792	7.53e-12	551	--	--	--	--	--	--	--	--	--	--	--	--	--	--	--	--	--	--	--	--	--	--	--	--	--	--	--	--
Cluster-31803.71008	874.258	8607.34	-3.2994	7.61e-12	571	--	--	--	--	--	--	--	--	--	--	--	--	--	--	--	--	--	--	--	--	--	--	--	--	--	--	--	--
Cluster-31803.41015	3241.53	30283.7	-3.2238	7.81e-12	3760	552816511	XP_005844705.1	858	2.3e-89	hypothetical protein CHLNCDRAFT_36764 [Chlorella variabilis]>gi|307104349|gb|EFN52603.1| hypothetical protein CHLNCDRAFT_36764 [Chlorella variabilis]	--	--	--	--	--	K12386	CTNS	cystinosin	http://www.genome.jp/dbget-bin/www_bget?ko:K12386	Q9VCR7	472	1.9e-45	Cystinosin homolog OS=Drosophila melanogaster GN=CG17119 PE=1 SV=2	PF05374//PF00810	Mu-Conotoxin//ER lumen protein retaining receptor	GO:0009405//GO:0006810//GO:0006621	pathogenesis//transport//protein retention in ER lumen	GO:0046923//GO:0019871	ER retention sequence binding//sodium channel inhibitor activity	GO:0005783//GO:0005576//GO:0016021	endoplasmic reticulum//extracellular region//integral component of membrane	KOG3145	Cystine transporter Cystinosin
Cluster-31803.77143	364.993	3962.48	-3.4405	8.79e-12	1925	760450431	XP_011402284.1	1328	3.8e-144	Calcium-dependent protein kinase 11 [Auxenochlorella protothecoides]>gi|675356791|gb|KFM29231.1| Calcium-dependent protein kinase 11 [Auxenochlorella protothecoides]			339	4.92e-175		K13412	CPK	calcium-dependent protein kinase	http://www.genome.jp/dbget-bin/www_bget?ko:K13412	Q06850	734	4e-76	Calcium-dependent protein kinase 1 OS=Arabidopsis thaliana GN=CPK1 PE=1 SV=1	PF12763//PF00036//PF01323//PF00069//PF13405//PF13202//PF06293//PF07714//PF13499//PF13833	Cytoskeletal-regulatory complex EF hand//EF hand//DSBA-like thioredoxin domain//Protein kinase domain//EF-hand domain//EF hand//Lipopolysaccharide kinase (Kdo/WaaP) family//Protein tyrosine kinase//EF-hand domain pair//EF-hand domain pair	GO:0006118//GO:0006468	obsolete electron transport//protein phosphorylation	GO:0005509//GO:0016773//GO:0005524//GO:0015035//GO:0005515//GO:0004672	calcium ion binding//phosphotransferase activity, alcohol group as acceptor//ATP binding//protein disulfide oxidoreductase activity//protein binding//protein kinase activity	GO:0016020	membrane	--	--
Cluster-31803.25448	545.307	5529.84	-3.3421	1.02e-11	1452	552828382	XP_005847471.1	673	2.5e-68	hypothetical protein CHLNCDRAFT_134417 [Chlorella variabilis]>gi|307107125|gb|EFN55369.1| hypothetical protein CHLNCDRAFT_134417 [Chlorella variabilis]	--	--	--	--	--	--	--	--	--	--	--	--	--	PF00760	Cucumovirus coat protein	--	--	--	--	GO:0019028	viral capsid	--	--
Cluster-31803.58528	86.0334	1269.57	-3.8833	1.03e-11	12119	552839904	XP_005849914.1	1601	5.2e-175	hypothetical protein CHLNCDRAFT_51116 [Chlorella variabilis]>gi|307109574|gb|EFN57812.1| hypothetical protein CHLNCDRAFT_51116 [Chlorella variabilis]			1005	0		K14772	UTP20	U3 small nucleolar RNA-associated protein 20	http://www.genome.jp/dbget-bin/www_bget?ko:K14772	Q8L733	383	1.3e-34	Putative transferase At4g12130, mitochondrial OS=Arabidopsis thaliana GN=At4g12130 PE=1 SV=1	PF02272//PF07359//PF12090	DHHA1 domain//Liver-expressed antimicrobial peptide 2 precursor (LEAP-2)//Spt20 family	GO:0042742	defense response to bacterium	GO:0003712//GO:0003676	transcription cofactor activity//nucleic acid binding	GO:0000124//GO:0005667	SAGA complex//transcription factor complex	KOG2929	Transcription factor, component of CCR4 transcriptional complex
Cluster-31803.55744	39.8552	8595.5	-7.7527	1.08e-11	2631	552847708	XP_005851928.1	251	3.9e-19	hypothetical protein CHLNCDRAFT_59547 [Chlorella variabilis]>gi|307111592|gb|EFN59826.1| hypothetical protein CHLNCDRAFT_59547 [Chlorella variabilis]			39	3.97e-08		--	--	--	--	O43570	140	4.1e-07	Carbonic anhydrase 12 OS=Homo sapiens GN=CA12 PE=1 SV=1	PF01213	Adenylate cyclase associated (CAP) N terminal	GO:0007010	cytoskeleton organization	GO:0003779	actin binding	--	--	KOG0382	Carbonic anhydrase
Cluster-31803.51712	1596.24	116.821	3.7723	1.12e-11	1294	--	--	--	--	--	--	--	--	--	--	--	--	--	--	--	--	--	--	PF06756//PF04625//PF05887	Chorion protein S19 C-terminal//DEC-1 protein, N-terminal region//Procyclic acidic repetitive protein (PARP)	GO:0007304//GO:0007275	chorion-containing eggshell formation//multicellular organismal development	GO:0005213	structural constituent of chorion	GO:0016020//GO:0005576//GO:0042600	membrane//extracellular region//chorion	--	--
Cluster-31803.69733	514.283	5184.27	-3.3335	1.19e-11	325	--	--	--	--	--	--	--	--	--	--	--	--	--	--	--	--	--	--	--	--	--	--	--	--	--	--	--	--
Cluster-31803.103140	342.359	3628.38	-3.4057	1.26e-11	421	--	--	--	--	--	--	--	--	--	--	--	--	--	--	--	--	--	--	--	--	--	--	--	--	--	--	--	--
Cluster-31803.67519	14.2727	483.582	-5.0824	1.31e-11	2555	--	--	--	--	--	--	--	--	--	--	--	--	--	--	--	--	--	--	--	--	--	--	--	--	--	--	--	--
Cluster-31803.15305	114.242	1504.17	-3.7188	1.33e-11	1172	--	--	--	--	--	--	--	--	--	--	--	--	--	--	--	--	--	--	PF11857//PF08354//PF01277	Domain of unknown function (DUF3377)//Domain of unknown function (DUF1729)//Oleosin	GO:0055114//GO:0042967//GO:0006633	oxidation-reduction process//acyl-carrier-protein biosynthetic process//fatty acid biosynthetic process	GO:0004222//GO:0004318	metalloendopeptidase activity//enoyl-[acyl-carrier-protein] reductase (NADH) activity	GO:0012511//GO:0005835//GO:0016021	monolayer-surrounded lipid storage body//fatty acid synthase complex//integral component of membrane	--	--
Cluster-31803.30546	623.105	6182	-3.3105	1.33e-11	2098	552847390	XP_005851853.1	584	7.6e-58	hypothetical protein CHLNCDRAFT_133374 [Chlorella variabilis]>gi|307111517|gb|EFN59751.1| hypothetical protein CHLNCDRAFT_133374 [Chlorella variabilis]	--	--	--	--	--	--	--	--	--	Q0WRW8	247	1.3e-19	Cytochrome b561 and DOMON domain-containing protein At3g07570 OS=Arabidopsis thaliana GN=At3g07570 PE=2 SV=1	PF03188	Eukaryotic cytochrome b561	--	--	--	--	GO:0016021	integral component of membrane	--	--
Cluster-31803.103374	501.177	4980.39	-3.3129	1.34e-11	2574	552829380	XP_005847690.1	206	6.4e-14	hypothetical protein CHLNCDRAFT_134115 [Chlorella variabilis]>gi|307107345|gb|EFN55588.1| hypothetical protein CHLNCDRAFT_134115 [Chlorella variabilis]			59	2.96e-19		--	--	--	--	--	--	--	--	--	--	--	--	GO:0016787	hydrolase activity	--	--	--	--
Cluster-31803.17275	793.567	7702.05	-3.2788	1.42e-11	2504	552822123	XP_005846030.1	143	1.3e-06	hypothetical protein CHLNCDRAFT_53437 [Chlorella variabilis]>gi|307105680|gb|EFN53928.1| hypothetical protein CHLNCDRAFT_53437 [Chlorella variabilis]	--	--	--	--	--	--	--	--	--	--	--	--	--	PF00320	GATA zinc finger	GO:0006355	regulation of transcription, DNA-templated	GO:0008270//GO:0043565//GO:0003700	zinc ion binding//sequence-specific DNA binding//transcription factor activity, sequence-specific DNA binding	GO:0005667	transcription factor complex	--	--
Cluster-31803.11419	12.5225	447.658	-5.1598	1.46e-11	880	806933873	AKC04611.1	526	1.7e-51	Hsp24 protein [Populus davidiana x Populus alba var. pyramidalis]			67	3.52e-24		--	--	--	--	P19752	444	7.7e-43	30 kDa heat shock protein OS=Neurospora crassa (strain ATCC 24698 / 74-OR23-1A / CBS 708.71 / DSM 1257 / FGSC 987) GN=hsp30 PE=3 SV=1	PF06459//PF05808	Ryanodine Receptor TM 4-6//Podoplanin	GO:0006816//GO:0006874	calcium ion transport//cellular calcium ion homeostasis	GO:0005219	ryanodine-sensitive calcium-release channel activity	GO:0016021//GO:0005622	integral component of membrane//intracellular	--	--
Cluster-31803.77613	262.637	0	Inf	1.47e-11	6098	552837389	XP_005849350.1	1939	1.7e-214	expressed protein [Chlorella variabilis]>gi|307109009|gb|EFN57248.1| expressed protein [Chlorella variabilis]			308	2.7e-157		--	--	--	--	Q59RQ0	214	2.5e-15	ATP-dependent DNA helicase PIF1 OS=Candida albicans (strain SC5314 / ATCC MYA-2876) GN=PIF1 PE=3 SV=1	PF00910//PF02562//PF00004//PF13851//PF01637//PF05637//PF06068//PF00493//PF03193//PF17001//PF00005//PF00437//PF07728//PF03266//PF06331//PF12297//PF01695//PF00158//PF05970//PF00270	RNA helicase//PhoH-like protein//ATPase family associated with various cellular activities (AAA)//Growth-arrest specific micro-tubule binding//Archaeal ATPase//galactosyl transferase GMA12/MNN10 family//TIP49 C-terminus//MCM2/3/5 family//Protein of unknown function, DUF258//Type III secretion basal body protein I, YscI, HrpB, PscI//ABC transporter//Type II/IV secretion system protein//AAA domain …	GO:0007224//GO:0048870//GO:0009306//GO:0000723//GO:0006289//GO:0006260//GO:0006810//GO:0006281//GO:0006355	smoothened signaling pathway//cell motility//protein secretion//telomere maintenance//nucleotide-excision repair//DNA replication//transport//DNA repair//regulation of transcription, DNA-templated	GO:0008134//GO:0005524//GO:0003677//GO:0003723//GO:0003924//GO:0016757//GO:0005525//GO:0016887//GO:0003724//GO:0003678//GO:0098519//GO:0003676	transcription factor binding//ATP binding//DNA binding//RNA binding//GTPase activity//transferase activity, transferring glycosyl groups//GTP binding//ATPase activity//RNA helicase activity//DNA helicase activity//nucleotide phosphatase activity, acting on free nucleotides//nucleic acid binding	GO:0031514//GO:0005667//GO:0005657//GO:0000439//GO:0016021	motile cilium//transcription factor complex//replication fork//core TFIIH complex//integral component of membrane	KOG0987	DNA helicase PIF1/RRM3
Cluster-31803.52681	0.365533	207.815	-9.1511	1.62e-11	3207	552837904	XP_005849468.1	1511	3.8e-165	hypothetical protein CHLNCDRAFT_30281 [Chlorella variabilis]>gi|307109128|gb|EFN57366.1| hypothetical protein CHLNCDRAFT_30281 [Chlorella variabilis]			306	1.83e-156		K09832	CYP710A	cytochrome P450, family 710, subfamily A	http://www.genome.jp/dbget-bin/www_bget?ko:K09832	O64698	791	1.6e-82	Cytochrome P450 710A2 OS=Arabidopsis thaliana GN=CYP710A2 PE=2 SV=1	PF00067//PF02185//PF16331	Cytochrome P450//Hr1 repeat//TolA binding protein trimerisation	GO:0055114//GO:0070206//GO:0007165//GO:0006118	oxidation-reduction process//protein trimerization//signal transduction//obsolete electron transport	GO:0005506//GO:0004497//GO:0020037//GO:0016705//GO:0009055	iron ion binding//monooxygenase activity//heme binding//oxidoreductase activity, acting on paired donors, with incorporation or reduction of molecular oxygen//electron carrier activity	--	--	KOG0157	Cytochrome P450 CYP4/CYP19/CYP26 subfamilies
Cluster-31803.76470	1411.07	13053.8	-3.2096	1.7e-11	2803	552846671	XP_005851672.1	581	2.3e-57	hypothetical protein CHLNCDRAFT_132909 [Chlorella variabilis]>gi|307111336|gb|EFN59570.1| hypothetical protein CHLNCDRAFT_132909 [Chlorella variabilis]			127	5.11e-57		--	--	--	--	Q9Z2Q4	134	2.2e-06	Methionine synthase OS=Rattus norvegicus GN=Mtr PE=2 SV=1	--	--	--	--	--	--	--	--	--	--
Cluster-31803.10590	2.85648	285.772	-6.6445	1.76e-11	491	--	--	--	--	--	--	--	--	--	--	--	--	--	--	--	--	--	--	--	--	--	--	--	--	--	--	--	--
Cluster-31803.32742	463.569	13.5612	5.0952	1.77e-11	5315	552845348	XP_005851327.1	1418	3.8e-154	expressed protein [Chlorella variabilis]>gi|307110990|gb|EFN59225.1| expressed protein [Chlorella variabilis]			173	2.61e-82		--	--	--	--	Q9LBW5	183	8.6e-12	3-hexulose-6-phosphate isomerase OS=Mycobacterium gastri GN=rmpB PE=2 SV=1	PF14999//PF08926//PF01695//PF07728//PF06414//PF05496//PF00005//PF00931//PF01380//PF06068//PF02367//PF07931//PF00004//PF01591//PF01443//PF00910//PF02224	Shadow of prion protein, neuroprotective//Domain of unknown function (DUF1908)//IstB-like ATP binding protein//AAA domain (dynein-related subfamily)//Zeta toxin//Holliday junction DNA helicase ruvB N-terminus//ABC transporter//NB-ARC domain//SIS domain//TIP49 C-terminus//Threonylcarbamoyl adenosine biosynthesis protein TsaE//Chloramphenicol phosphotransferase-like protein//ATPase family associate…	GO:0006013//GO:0006468//GO:0016310//GO:0009069//GO:0006139//GO:0006206//GO:0006281//GO:0002949//GO:0005975//GO:0006310//GO:0006000	mannose metabolic process//protein phosphorylation//phosphorylation//serine family amino acid metabolic process//nucleobase-containing compound metabolic process//pyrimidine nucleobase metabolic process//DNA repair//tRNA threonylcarbamoyladenosine modification//carbohydrate metabolic process//DNA recombination//fructose metabolic process	GO:0003873//GO:0016740//GO:0030246//GO:0005524//GO:0003723//GO:0004127//GO:0043531//GO:0004674//GO:0003678//GO:0003724//GO:0009378//GO:0000287//GO:0016887//GO:0016301	6-phosphofructo-2-kinase activity//transferase activity//carbohydrate binding//ATP binding//RNA binding//cytidylate kinase activity//ADP binding//protein serine/threonine kinase activity//DNA helicase activity//RNA helicase activity//four-way junction helicase activity//magnesium ion binding//ATPase activity//kinase activity	GO:0005657//GO:0031225//GO:0009379	replication fork//anchored component of membrane//Holliday junction helicase complex	--	--
Cluster-31803.14875	115.078	2845.18	-4.6278	1.87e-11	1684	553176584	XP_005852383.1	346	2.4e-30	two component regulator propeller domain-containing protein, partial [Nannochloropsis gaditana CCMP526]>gi|422299747|gb|EKU23502.1| two component regulator propeller domain-containing protein, partial [Nannochloropsis gaditana CCMP526]	--	--	--	--	--	K01366	CTSH	cathepsin H	http://www.genome.jp/dbget-bin/www_bget?ko:K01366	O60911	157	2.8e-09	Cathepsin L2 OS=Homo sapiens GN=CTSV PE=1 SV=2	PF03051//PF00112	Peptidase C1-like family//Papain family cysteine protease	GO:0006508	proteolysis	GO:0004197//GO:0008234	cysteine-type endopeptidase activity//cysteine-type peptidase activity	--	--	KOG1543	Cysteine proteinase Cathepsin L
Cluster-31803.86747	0	244.179	#NAME?	1.88e-11	4920	552832491	XP_005848357.1	1358	3.2e-147	hypothetical protein CHLNCDRAFT_22496 [Chlorella variabilis]>gi|307108014|gb|EFN56255.1| hypothetical protein CHLNCDRAFT_22496 [Chlorella variabilis]			602	0		K00872	thrB1	homoserine kinase	http://www.genome.jp/dbget-bin/www_bget?ko:K00872	Q8L7R2	805	5.9e-84	Homoserine kinase OS=Arabidopsis thaliana GN=HSK PE=1 SV=1	PF02502//PF00892//PF00288//PF01130	Ribose/Galactose Isomerase//EamA-like transporter family//GHMP kinases N terminal domain//CD36 family	GO:0016310//GO:0006544//GO:0007155//GO:0006563//GO:0005975//GO:0006566	phosphorylation//glycine metabolic process//cell adhesion//L-serine metabolic process//carbohydrate metabolic process//threonine metabolic process	GO:0004413//GO:0016853//GO:0005524	homoserine kinase activity//isomerase activity//ATP binding	GO:0016021//GO:0016020	integral component of membrane//membrane	KOG1537	Homoserine kinase
Cluster-31803.15543	247.897	2732.42	-3.4624	1.89e-11	3649	761974958	KIZ04980.1	1079	5.3e-115	putative quinone-oxidoreductase, chloroplastic [Monoraphidium neglectum]			300	4.51e-153		--	--	--	--	Q9SV68	374	4.2e-34	Putative quinone-oxidoreductase homolog, chloroplastic OS=Arabidopsis thaliana GN=At4g13010 PE=2 SV=1	PF00107//PF15826//PF04625//PF01213//PF08240	Zinc-binding dehydrogenase//Bcl-2-binding component 3, p53 upregulated modulator of apoptosis//DEC-1 protein, N-terminal region//Adenylate cyclase associated (CAP) N terminal//Alcohol dehydrogenase GroES-like domain	GO:0007010//GO:0007304//GO:0055114//GO:0097193//GO:0043065//GO:0090200	cytoskeleton organization//chorion-containing eggshell formation//oxidation-reduction process//intrinsic apoptotic signaling pathway//positive regulation of apoptotic process//positive regulation of release of cytochrome c from mitochondria	GO:0005213//GO:0003779	structural constituent of chorion//actin binding	GO:0042600//GO:0005739//GO:0005576	chorion//mitochondrion//extracellular region	KOG1198	Zinc-binding oxidoreductase
Cluster-31803.90613	756.791	7124.72	-3.2349	1.96e-11	1488	552818842	XP_005845286.1	501	2.3e-48	hypothetical protein CHLNCDRAFT_136997 [Chlorella variabilis]>gi|307104933|gb|EFN53184.1| hypothetical protein CHLNCDRAFT_136997 [Chlorella variabilis]	--	--	--	--	--	K16298	SCPL-IV	serine carboxypeptidase-like clade IV	http://www.genome.jp/dbget-bin/www_bget?ko:K16298	Q9FFB0	349	1.3e-31	Serine carboxypeptidase-like 47 OS=Arabidopsis thaliana GN=SCPL47 PE=2 SV=1	PF00450	Serine carboxypeptidase	GO:0006508	proteolysis	GO:0004185	serine-type carboxypeptidase activity	--	--	KOG1282	Serine carboxypeptidases (lysosomal cathepsin A)
Cluster-31803.45325	15228.4	131584	-3.1111	2.11e-11	796	552838242	XP_005849536.1	461	5.3e-44	hypothetical protein CHLNCDRAFT_142903 [Chlorella variabilis]>gi|307109196|gb|EFN57434.1| hypothetical protein CHLNCDRAFT_142903 [Chlorella variabilis]	--	--	--	--	--	--	--	--	--	--	--	--	--	PF07562//PF00020	Nine Cysteines Domain of family 3 GPCR//TNFR/NGFR cysteine-rich region	GO:0007186	G-protein coupled receptor signaling pathway	GO:0005515//GO:0004930	protein binding//G-protein coupled receptor activity	--	--	--	--
Cluster-31803.42120	358.007	4.71327	6.2471	2.43e-11	2292	552809908	XP_005843063.1	555	1.9e-54	hypothetical protein CHLNCDRAFT_141587 [Chlorella variabilis]>gi|307102692|gb|EFN50961.1| hypothetical protein CHLNCDRAFT_141587 [Chlorella variabilis]	--	--	--	--	--	K15109	SLC25A20_29, CACT, CACL, CRC1	solute carrier family 25 (mitochondrial carnitine/acylcarnitine transporter), member 20/29	http://www.genome.jp/dbget-bin/www_bget?ko:K15109	Q84UC7	255	1.7e-20	Mitochondrial arginine transporter BAC1 OS=Arabidopsis thaliana GN=BAC1 PE=1 SV=1	PF11545	Cell surface heme-binding protein Shp	--	--	GO:0020037	heme binding	--	--	KOG0758	Mitochondrial carnitine-acylcarnitine carrier protein
Cluster-31803.64878	232.721	0	Inf	2.58e-11	1962	--	--	--	--	--	--	--	--	--	--	--	--	--	--	--	--	--	--	--	--	--	--	--	--	--	--	--	--
Cluster-31803.54877	16025.2	135426	-3.0791	2.88e-11	879	552820992	XP_005845727.1	371	1.6e-33	hypothetical protein CHLNCDRAFT_58424 [Chlorella variabilis]>gi|307105376|gb|EFN53625.1| hypothetical protein CHLNCDRAFT_58424 [Chlorella variabilis]	--	--	--	--	--	--	--	--	--	--	--	--	--	PF00020//PF07562	TNFR/NGFR cysteine-rich region//Nine Cysteines Domain of family 3 GPCR	GO:0007186	G-protein coupled receptor signaling pathway	GO:0005515//GO:0004930	protein binding//G-protein coupled receptor activity	--	--	--	--
Cluster-31803.45324	3884.34	33675.2	-3.1159	2.88e-11	273	--	--	--	--	--	--	--	--	--	--	--	--	--	--	--	--	--	--	--	--	--	--	--	--	--	--	--	--
Cluster-31803.81826	17.6594	611.476	-5.1138	3.03e-11	4982	552836818	XP_005849232.1	1100	2.7e-117	hypothetical protein CHLNCDRAFT_21492 [Chlorella variabilis]>gi|307108891|gb|EFN57130.1| hypothetical protein CHLNCDRAFT_21492 [Chlorella variabilis]			60	1.6e-19		K06442	tlyA	23S rRNA (cytidine1920-2'-O)/16S rRNA (cytidine1409-2'-O)-methyltransferase	http://www.genome.jp/dbget-bin/www_bget?ko:K06442	P9WJ63	430	1.8e-40	16S/23S rRNA (cytidine-2'-O)-methyltransferase TlyA OS=Mycobacterium tuberculosis (strain ATCC 25618 / H37Rv) GN=tlyA PE=1 SV=1	PF00737//PF09142//PF13606//PF00023//PF01728//PF01479//PF08241//PF08115	Photosystem II 10 kDa phosphoprotein//tRNA Pseudouridine synthase II, C terminal//Ankyrin repeat//Ankyrin repeat//FtsJ-like methyltransferase//S4 domain//Methyltransferase domain//SFI toxin family	GO:0009405//GO:0050821//GO:0001522//GO:0015979//GO:0008152//GO:0009451//GO:0032259	pathogenesis//protein stabilization//pseudouridine synthesis//photosynthesis//metabolic process//RNA modification//methylation	GO:0042301//GO:0003723//GO:0009982//GO:0008168//GO:0005515	phosphate ion binding//RNA binding//pseudouridine synthase activity//methyltransferase activity//protein binding	GO:0005576//GO:0009523//GO:0016020	extracellular region//photosystem II//membrane	--	--
Cluster-31803.11142	95.8374	1285.57	-3.7457	3.2e-11	899	--	--	--	--	--	--	--	--	--	--	--	--	--	--	--	--	--	--	PF05791//PF08138//PF04513//PF04728//PF05531//PF00015//PF06009	Bacillus haemolytic enterotoxin (HBL)//Sex peptide (SP) family//Baculovirus polyhedron envelope protein, PEP, C terminus//Lipoprotein leucine-zipper//Nucleopolyhedrovirus P10 protein//Methyl-accepting chemotaxis protein (MCP) signalling domain//Laminin Domain II	GO:0007155//GO:0009405//GO:0046008//GO:0007165	cell adhesion//pathogenesis//regulation of female receptivity, post-mating//signal transduction	GO:0005198//GO:0005179//GO:0004871	structural molecule activity//hormone activity//signal transducer activity	GO:0016020//GO:0019867//GO:0019031//GO:0005576//GO:0019028	membrane//outer membrane//viral envelope//extracellular region//viral capsid	--	--
Cluster-31803.78456	0.731066	217.195	-8.2148	3.55e-11	2662	552831568	XP_005848164.1	1616	2.1e-177	hypothetical protein CHLNCDRAFT_145535 [Chlorella variabilis]>gi|307107820|gb|EFN56062.1| hypothetical protein CHLNCDRAFT_145535 [Chlorella variabilis]			597	0		K06067	HDAC1_2	histone deacetylase 1/2	http://www.genome.jp/dbget-bin/www_bget?ko:K06067	O22446	923	6.7e-98	Histone deacetylase 19 OS=Arabidopsis thaliana GN=HDA19 PE=1 SV=2	--	--	GO:0070932//GO:0006355//GO:0070933//GO:0006807	histone H3 deacetylation//regulation of transcription, DNA-templated//histone H4 deacetylation//nitrogen compound metabolic process	GO:0097372//GO:0032041//GO:0046970//GO:0046969	NAD-dependent histone deacetylase activity (H3-K18 specific)//NAD-dependent histone deacetylase activity (H3-K14 specific)//NAD-dependent histone deacetylase activity (H4-K16 specific)//NAD-dependent histone deacetylase activity (H3-K9 specific)	GO:0005634//GO:0000118	nucleus//histone deacetylase complex	KOG1342	Histone deacetylase complex, catalytic component RPD3
Cluster-31803.56686	4266.27	36536.1	-3.0983	3.61e-11	500	552832502	XP_005848360.1	326	1.5e-28	hypothetical protein CHLNCDRAFT_145099 [Chlorella variabilis]>gi|307108017|gb|EFN56258.1| hypothetical protein CHLNCDRAFT_145099 [Chlorella variabilis]	--	--	--	--	--	--	--	--	--	--	--	--	--	PF04626//PF07562//PF00020	Dec-1 protein, C terminal region//Nine Cysteines Domain of family 3 GPCR//TNFR/NGFR cysteine-rich region	GO:0007186//GO:0007304	G-protein coupled receptor signaling pathway//chorion-containing eggshell formation	GO:0005515//GO:0004930//GO:0005213	protein binding//G-protein coupled receptor activity//structural constituent of chorion	GO:0005576//GO:0042600	extracellular region//chorion	--	--
Cluster-31803.69072	575.538	5534.66	-3.2655	3.81e-11	721	--	--	--	--	--	--	--	--	--	--	--	--	--	--	--	--	--	--	PF00517	Retroviral envelope protein	--	--	GO:0005198	structural molecule activity	GO:0019031	viral envelope	--	--
Cluster-31803.99134	1.82766	247.542	-7.0815	3.85e-11	3406	552818749	XP_005845258.1	948	7.7e-100	hypothetical protein CHLNCDRAFT_136931 [Chlorella variabilis]>gi|307104905|gb|EFN53156.1| hypothetical protein CHLNCDRAFT_136931 [Chlorella variabilis]	--	--	--	--	--	--	--	--	--	Q9Y4C4	153	1.7e-08	Malignant fibrous histiocytoma-amplified sequence 1 OS=Homo sapiens GN=MFHAS1 PE=1 SV=2	PF13855//PF04186//PF00560	Leucine rich repeat//FxsA cytoplasmic membrane protein//Leucine Rich Repeat	--	--	GO:0005515	protein binding	GO:0016020	membrane	KOG0619	FOG: Leucine rich repeat
Cluster-31803.25507	64.3266	1416.4	-4.4607	4.78e-11	4098	552829380	XP_005847690.1	964	1.3e-101	hypothetical protein CHLNCDRAFT_134115 [Chlorella variabilis]>gi|307107345|gb|EFN55588.1| hypothetical protein CHLNCDRAFT_134115 [Chlorella variabilis]			330	1.07e-169		K15340	DCLRE1A, SNM1A, PSO2	DNA cross-link repair 1A protein	http://www.genome.jp/dbget-bin/www_bget?ko:K15340	Q9JIC3	404	1.6e-37	DNA cross-link repair 1A protein OS=Mus musculus GN=Dclre1a PE=2 SV=2	--	--	--	--	GO:0016787	hydrolase activity	--	--	KOG1361	Predicted hydrolase involved in interstrand cross-link repair
Cluster-31803.54692	211.818	2254.66	-3.412	4.89e-11	480	552818162	XP_005845127.1	308	1.8e-26	hypothetical protein CHLNCDRAFT_137523 [Chlorella variabilis]>gi|307104773|gb|EFN53025.1| hypothetical protein CHLNCDRAFT_137523 [Chlorella variabilis]	--	--	--	--	--	--	--	--	--	--	--	--	--	--	--	--	--	--	--	--	--	--	--
Cluster-31803.11955	6.4053	337.618	-5.72	5.33e-11	3262	552833193	XP_005848503.1	1367	1.9e-148	hypothetical protein CHLNCDRAFT_144977 [Chlorella variabilis]>gi|307108160|gb|EFN56401.1| hypothetical protein CHLNCDRAFT_144977 [Chlorella variabilis]			489	0		--	--	--	--	Q05648	132	4.3e-06	Uncharacterized protein YDR282C OS=Saccharomyces cerevisiae (strain ATCC 204508 / S288c) GN=YDR282C PE=3 SV=1	PF00072	Response regulator receiver domain	GO:0000160	phosphorelay signal transduction system	--	--	--	--	--	--
Cluster-31803.33376	3.65533	326.296	-6.48	5.33e-11	5518	552814363	XP_005844172.1	4224	0	hypothetical protein CHLNCDRAFT_139318 [Chlorella variabilis]>gi|307103813|gb|EFN52070.1| hypothetical protein CHLNCDRAFT_139318 [Chlorella variabilis]			1347	0		K06972	K06972	uncharacterized protein	http://www.genome.jp/dbget-bin/www_bget?ko:K06972	Q9LJL3	2838	0	Presequence protease 1, chloroplastic/mitochondrial OS=Arabidopsis thaliana GN=PREP1 PE=1 SV=2	PF01265//PF08367	Cytochrome c/c1 heme lyase//Peptidase M16C associated	GO:0015994//GO:0006508	chlorophyll metabolic process//proteolysis	GO:0046872//GO:0004222//GO:0008270//GO:0004408	metal ion binding//metalloendopeptidase activity//zinc ion binding//holocytochrome-c synthase activity	GO:0005739	mitochondrion	KOG2019	Metalloendoprotease HMP1 (insulinase superfamily)
Cluster-31803.103199	2231.85	44210.1	-4.3081	5.53e-11	1439	--	--	--	--	--	--	--	--	--	--	--	--	--	--	--	--	--	--	--	--	--	--	--	--	--	--	--	--
Cluster-31803.10676	4.66478	474.546	-6.6686	5.77e-11	1818	302833225	XP_002948176.1	701	1.8e-71	hypothetical protein VOLCADRAFT_88536 [Volvox carteri f. nagariensis]>gi|300266396|gb|EFJ50583.1| hypothetical protein VOLCADRAFT_88536 [Volvox carteri f. nagariensis]	--	--	--	--	--	--	--	--	--	P0DL10	382	2.5e-35	Leucine-rich repeat receptor-like kinase protein THICK TASSEL DWARF1 OS=Zea mays GN=TD1 PE=2 SV=1	PF00560//PF13855	Leucine Rich Repeat//Leucine rich repeat	--	--	GO:0005515	protein binding	--	--	--	--
Cluster-31803.57733	2229.41	18729.1	-3.0706	5.82e-11	768	--	--	--	--	--	--	--	--	--	--	--	--	--	--	--	--	--	--	--	--	--	--	--	--	--	--	--	--
Cluster-31803.64027	202.789	2164.02	-3.4157	5.97e-11	1161	552841959	XP_005850444.1	380	1.9e-34	hypothetical protein CHLNCDRAFT_57139 [Chlorella variabilis]>gi|307110105|gb|EFN58342.1| hypothetical protein CHLNCDRAFT_57139 [Chlorella variabilis]			110	5.86e-48		K14190	VTC2_5	GDP-L-galactose phosphorylase	http://www.genome.jp/dbget-bin/www_bget?ko:K14190	Q9FLP9	199	2.6e-14	GDP-L-galactose phosphorylase 2 OS=Arabidopsis thaliana GN=VTC5 PE=1 SV=1	--	--	--	--	--	--	--	--	--	--
Cluster-31803.77038	0	180.25	#NAME?	6.08e-11	3567	552841625	XP_005850359.1	382	3.4e-34	hypothetical protein CHLNCDRAFT_142199 [Chlorella variabilis]>gi|307110020|gb|EFN58257.1| hypothetical protein CHLNCDRAFT_142199 [Chlorella variabilis]	--	--	--	--	--	--	--	--	--	--	--	--	--	PF01770//PF03153	Reduced folate carrier//Transcription factor IIA, alpha/beta subunit	GO:0006367//GO:0006810	transcription initiation from RNA polymerase II promoter//transport	--	--	GO:0016020//GO:0005672	membrane//transcription factor TFIIA complex	--	--
Cluster-31803.55535	223.723	0	Inf	6.11e-11	2446	552843018	XP_005850722.1	199	3.9e-13	hypothetical protein CHLNCDRAFT_19492 [Chlorella variabilis]>gi|307110384|gb|EFN58620.1| hypothetical protein CHLNCDRAFT_19492 [Chlorella variabilis]	--	--	--	--	--	--	--	--	--	Q569D5	160	1.8e-09	Selenium-binding protein 1 OS=Xenopus tropicalis GN=selenbp1 PE=2 SV=1	PF05694//PF05478//PF13374//PF16331//PF00435//PF05531//PF10191//PF10392//PF08074//PF13851//PF07361//PF04977	56kDa selenium binding protein (SBP56)//Prominin//Tetratricopeptide repeat//TolA binding protein trimerisation//Spectrin repeat//Nucleopolyhedrovirus P10 protein//Golgi complex component 7 (COG7)//Golgi transport complex subunit 5//CHDCT2 (NUC038) domain//Growth-arrest specific micro-tubule binding//Cytochrome b562//Septum formation initiator	GO:0007049//GO:0048870//GO:0006891//GO:0070206//GO:0022900//GO:0006886//GO:0006118//GO:0006355	cell cycle//cell motility//intra-Golgi vesicle-mediated transport//protein trimerization//electron transport chain//intracellular protein transport//obsolete electron transport//regulation of transcription, DNA-templated	GO:0005524//GO:0003677//GO:0008430//GO:0009055//GO:0016818//GO:0020037//GO:0008270//GO:0005506//GO:0005515	ATP binding//DNA binding//selenium binding//electron carrier activity//hydrolase activity, acting on acid anhydrides, in phosphorus-containing anhydrides//heme binding//zinc ion binding//iron ion binding//protein binding	GO:0031514//GO:0019028//GO:0017119//GO:0042597//GO:0005634//GO:0016021	motile cilium//viral capsid//Golgi transport complex//periplasmic space//nucleus//integral component of membrane	KOG0918	Selenium-binding protein
Cluster-31803.11975	543.056	6275.29	-3.5305	6.32e-11	1727	--	--	--	--	--	--	--	--	--	--	--	--	--	--	--	--	--	--	PF00015//PF06009//PF06005//PF04977//PF08138//PF04728//PF09177//PF17082//PF04513//PF05791	Methyl-accepting chemotaxis protein (MCP) signalling domain//Laminin Domain II//Protein of unknown function (DUF904)//Septum formation initiator//Sex peptide (SP) family//Lipoprotein leucine-zipper//Syntaxin 6, N-terminal//Spindle Pole Component 29//Baculovirus polyhedron envelope protein, PEP, C terminus//Bacillus haemolytic enterotoxin (HBL)	GO:0007155//GO:0000917//GO:0043093//GO:0009405//GO:0048193//GO:0007049//GO:0007165//GO:0046008//GO:0030474	cell adhesion//barrier septum assembly//FtsZ-dependent cytokinesis//pathogenesis//Golgi vesicle transport//cell cycle//signal transduction//regulation of female receptivity, post-mating//spindle pole body duplication	GO:0005200//GO:0005198//GO:0005179//GO:0004871	structural constituent of cytoskeleton//structural molecule activity//hormone activity//signal transducer activity	GO:0005823//GO:0005576//GO:0019028//GO:0016020//GO:0005856//GO:0019867//GO:0005737//GO:0019031	central plaque of spindle pole body//extracellular region//viral capsid//membrane//cytoskeleton//outer membrane//cytoplasm//viral envelope	--	--
Cluster-31803.87812	3.20265	275.011	-6.4241	6.43e-11	1867	552829960	XP_005847812.1	363	2.9e-32	hypothetical protein CHLNCDRAFT_134006 [Chlorella variabilis]>gi|307107467|gb|EFN55710.1| hypothetical protein CHLNCDRAFT_134006 [Chlorella variabilis]			143	4.31e-66		--	--	--	--	--	--	--	--	--	--	--	--	--	--	--	--	--	--
Cluster-31803.47720	342.228	6.02721	5.8273	6.76e-11	929	--	--	--	--	--	--	--	--	--	--	--	--	--	--	--	--	--	--	--	--	--	--	--	--	--	--	--	--
Cluster-31803.104569	22.6316	540.902	-4.579	6.79e-11	1750	552822366	XP_005846097.1	219	1.3e-15	expressed protein [Chlorella variabilis]>gi|307105747|gb|EFN53995.1| expressed protein [Chlorella variabilis]	--	--	--	--	--	--	--	--	--	--	--	--	--	--	--	--	--	--	--	--	--	--	--
Cluster-31803.94937	61.4095	945.926	-3.9452	7.16e-11	2605	302833090	XP_002948109.1	1695	1.4e-186	hypothetical protein VOLCADRAFT_80016 [Volvox carteri f. nagariensis]>gi|300266911|gb|EFJ51097.1| hypothetical protein VOLCADRAFT_80016 [Volvox carteri f. nagariensis]			727	0		K01867	WARS, trpS	tryptophanyl-tRNA synthetase	http://www.genome.jp/dbget-bin/www_bget?ko:K01867	Q9SR15	1427	2.4e-156	Tryptophan--tRNA ligase, cytoplasmic OS=Arabidopsis thaliana GN=At3g04600 PE=2 SV=1	PF02422//PF00722//PF00579	Keratin//Glycosyl hydrolases family 16//tRNA synthetases class I (W and Y)	GO:0005975//GO:0006418//GO:0006568//GO:0006436	carbohydrate metabolic process//tRNA aminoacylation for protein translation//tryptophan metabolic process//tryptophanyl-tRNA aminoacylation	GO:0005524//GO:0000166//GO:0005200//GO:0004830//GO:0004553//GO:0004812	ATP binding//nucleotide binding//structural constituent of cytoskeleton//tryptophan-tRNA ligase activity//hydrolase activity, hydrolyzing O-glycosyl compounds//aminoacyl-tRNA ligase activity	GO:0005882//GO:0005856//GO:0005737	intermediate filament//cytoskeleton//cytoplasm	KOG2145	Cytoplasmic tryptophanyl-tRNA synthetase
Cluster-31803.71398	223.079	2314.26	-3.3749	7.19e-11	1291	551677422	XP_005841464.1	223	3.4e-16	hypothetical protein GUITHDRAFT_63622 [Guillardia theta CCMP2712]>gi|428185632|gb|EKX54484.1| hypothetical protein GUITHDRAFT_63622 [Guillardia theta CCMP2712]	--	--	--	--	--	--	--	--	--	Q9U489	195	8.4e-14	Protein lin-41 OS=Caenorhabditis elegans GN=lin-41 PE=1 SV=1	PF01436	NHL repeat	--	--	GO:0005515	protein binding	--	--	KOG2177	Predicted E3 ubiquitin ligase
Cluster-31803.61766	0.35585	196.631	-9.11	7.79e-11	1836	552841264	XP_005850260.1	646	4.3e-65	hypothetical protein CHLNCDRAFT_57026 [Chlorella variabilis]>gi|307109921|gb|EFN58158.1| hypothetical protein CHLNCDRAFT_57026 [Chlorella variabilis]	--	--	--	--	--	--	--	--	--	Q8K2T1	300	8e-26	NmrA-like family domain-containing protein 1 OS=Mus musculus GN=Nmral1 PE=1 SV=1	PF01370//PF01113//PF02254//PF01073//PF01118	NAD dependent epimerase/dehydratase family//Dihydrodipicolinate reductase, N-terminus//TrkA-N domain//3-beta hydroxysteroid dehydrogenase/isomerase family//Semialdehyde dehydrogenase, NAD binding domain	GO:0009085//GO:0008207//GO:0009089//GO:0008209//GO:0006813//GO:0008210//GO:0006694//GO:0055114	lysine biosynthetic process//C21-steroid hormone metabolic process//lysine biosynthetic process via diaminopimelate//androgen metabolic process//potassium ion transport//estrogen metabolic process//steroid biosynthetic process//oxidation-reduction process	GO:0051287//GO:0008839//GO:0003854//GO:0003824//GO:0050662//GO:0016616//GO:0016620	NAD binding//4-hydroxy-tetrahydrodipicolinate reductase//3-beta-hydroxy-delta5-steroid dehydrogenase activity//catalytic activity//coenzyme binding//oxidoreductase activity, acting on the CH-OH group of donors, NAD or NADP as acceptor//oxidoreductase activity, acting on the aldehyde or oxo group of donors, NAD or NADP as acceptor	--	--	--	--
Cluster-31803.53518	683.186	6075.77	-3.1527	8.16e-11	869	--	--	--	--	--	--	--	--	--	--	--	--	--	--	--	--	--	--	--	--	--	--	--	--	--	--	--	--
Cluster-31803.101292	6626.19	54121.6	-3.03	8.47e-11	490	552839446	XP_005849801.1	154	1.3e-08	hypothetical protein CHLNCDRAFT_50966 [Chlorella variabilis]>gi|307109461|gb|EFN57699.1| hypothetical protein CHLNCDRAFT_50966 [Chlorella variabilis]			39	6.99e-09		--	--	--	--	--	--	--	--	--	--	--	--	--	--	--	--	--	--
Cluster-31803.102259	599	5332.83	-3.1543	9.78e-11	2637	552842641	XP_005850624.1	745	2.1e-76	hypothetical protein CHLNCDRAFT_17265, partial [Chlorella variabilis]>gi|307110286|gb|EFN58522.1| hypothetical protein CHLNCDRAFT_17265, partial [Chlorella variabilis]	--	--	--	--	--	--	--	--	--	--	--	--	--	PF02971//PF07837	Formiminotransferase domain//Formiminotransferase domain, N-terminal subdomain	GO:0008152	metabolic process	GO:0016740//GO:0005542	transferase activity//folic acid binding	--	--	--	--
Cluster-31803.61284	218.463	0	Inf	1.03e-10	2927	552834345	XP_005848706.1	745	2.3e-76	hypothetical protein CHLNCDRAFT_144357, partial [Chlorella variabilis]>gi|307108364|gb|EFN56604.1| hypothetical protein CHLNCDRAFT_144357, partial [Chlorella variabilis]			121	1.16e-53		K10276	FBXL10_11, KDM2	F-box and leucine-rich repeat protein 10/11	http://www.genome.jp/dbget-bin/www_bget?ko:K10276	P0CH95	427	2.4e-40	Histone lysine demethylase PHF8 OS=Danio rerio GN=phf8 PE=1 SV=1	PF15926//PF00573//PF00739	E3 ubiquitin-protein ligase RNF220//Ribosomal protein L4/L1 family//Trans-activation protein X	GO:0042254//GO:0006412//GO:0090263//GO:0019079//GO:0016567	ribosome biogenesis//translation//positive regulation of canonical Wnt signaling pathway//viral genome replication//protein ubiquitination	GO:0003735	structural constituent of ribosome	GO:0005840	ribosome	KOG1633	F-box protein JEMMA and related proteins with JmjC, PHD, F-box and LRR domains
Cluster-31803.104070	680.325	6032.16	-3.1484	1.06e-10	1947	--	--	--	--	--	--	--	--	--	--	--	--	--	--	--	--	--	--	--	--	--	--	--	--	--	--	--	--
Cluster-31803.6774	1410.45	0	Inf	1.07e-10	2563	--	--	--	--	--	--	--	--	--	--	--	--	--	--	--	--	--	--	--	--	--	--	--	--	--	--	--	--
Cluster-31803.95726	7.8287	353.286	-5.4959	1.13e-10	2267	551548513	XP_005761899.1	165	3.2e-09	hypothetical protein EMIHUDRAFT_197918 [Emiliania huxleyi CCMP1516]>gi|485610777|gb|EOD09470.1| hypothetical protein EMIHUDRAFT_197918 [Emiliania huxleyi CCMP1516]	--	--	--	--	--	--	--	--	--	--	--	--	--	PF01583//PF14672//PF00448	Adenylylsulphate kinase//Late cornified envelope//SRP54-type protein, GTPase domain	GO:0006144//GO:0006614//GO:0008544//GO:0000103	purine nucleobase metabolic process//SRP-dependent cotranslational protein targeting to membrane//epidermis development//sulfate assimilation	GO:0005524//GO:0004020//GO:0005525	ATP binding//adenylylsulfate kinase activity//GTP binding	--	--	--	--
Cluster-31803.33877	35.9166	667.992	-4.2171	1.17e-10	1885	552833237	XP_005848514.1	423	3.2e-39	hypothetical protein CHLNCDRAFT_35163 [Chlorella variabilis]>gi|307108171|gb|EFN56412.1| hypothetical protein CHLNCDRAFT_35163 [Chlorella variabilis]	--	--	--	--	--	K01074	PPT	palmitoyl-protein thioesterase	http://www.genome.jp/dbget-bin/www_bget?ko:K01074	Q20390	226	3.1e-17	Palmitoyl-protein thioesterase 1 OS=Caenorhabditis elegans GN=ppt-1 PE=2 SV=2	PF02089	Palmitoyl protein thioesterase	GO:0006464	cellular protein modification process	GO:0008474//GO:0098599	palmitoyl-(protein) hydrolase activity//palmitoyl hydrolase activity	--	--	KOG2541	Palmitoyl protein thioesterase
Cluster-31803.50057	2534.62	195.375	3.6975	1.17e-10	1313	552820194	XP_005845554.1	231	4.1e-17	hypothetical protein CHLNCDRAFT_136705 [Chlorella variabilis]>gi|307105202|gb|EFN53452.1| hypothetical protein CHLNCDRAFT_136705 [Chlorella variabilis]	--	--	--	--	--	--	--	--	--	--	--	--	--	PF00272	Cecropin family	--	--	--	--	GO:0005576	extracellular region	--	--
Cluster-31803.53668	2419.6	214.3	3.4971	1.27e-10	7642	552845991	XP_005851501.1	1944	5.6e-215	hypothetical protein CHLNCDRAFT_33851 [Chlorella variabilis]>gi|307111164|gb|EFN59399.1| hypothetical protein CHLNCDRAFT_33851 [Chlorella variabilis]			590	0		--	--	--	--	Q03441	377	3.9e-34	Sporulation protein RMD1 OS=Saccharomyces cerevisiae (strain ATCC 204508 / S288c) GN=RMD1 PE=1 SV=1	PF06414//PF15966	Zeta toxin//F-box	--	--	GO:0016301//GO:0005515//GO:0005524	kinase activity//protein binding//ATP binding	--	--	KOG2861	Uncharacterized conserved protein
Cluster-31803.100855	1.8083	232.531	-7.0066	1.34e-10	786	552826130	XP_005846961.1	243	1e-18	expressed protein [Chlorella variabilis]>gi|307106614|gb|EFN54859.1| expressed protein [Chlorella variabilis]	--	--	--	--	--	--	--	--	--	--	--	--	--	--	--	--	--	--	--	--	--	--	--
Cluster-31803.104603	23.4692	544.972	-4.5373	1.34e-10	1356	552812772	XP_005843783.1	149	1.4e-07	hypothetical protein CHLNCDRAFT_139913 [Chlorella variabilis]>gi|307103421|gb|EFN51681.1| hypothetical protein CHLNCDRAFT_139913 [Chlorella variabilis]	--	--	--	--	--	--	--	--	--	--	--	--	--	--	--	--	--	--	--	--	--	--	--
Cluster-31803.47165	252.174	2476.91	-3.296	1.37e-10	712	552823678	XP_005846415.1	349	4.6e-31	hypothetical protein CHLNCDRAFT_25068 [Chlorella variabilis]>gi|307106066|gb|EFN54313.1| hypothetical protein CHLNCDRAFT_25068 [Chlorella variabilis]	--	--	--	--	--	--	--	--	--	Q2KHS5	131	1.2e-06	2-acylglycerol O-acyltransferase 2-A OS=Xenopus laevis GN=mogat2-a PE=2 SV=1	PF03982	Diacylglycerol acyltransferase	--	--	GO:0016747	transferase activity, transferring acyl groups other than amino-acyl groups	--	--	--	--
Cluster-31803.45332	260.286	2586.96	-3.3131	1.38e-10	227	552813964	XP_005844077.1	169	1.1e-10	hypothetical protein CHLNCDRAFT_139472 [Chlorella variabilis]>gi|307103717|gb|EFN51975.1| hypothetical protein CHLNCDRAFT_139472 [Chlorella variabilis]	--	--	--	--	--	--	--	--	--	--	--	--	--	PF10589	NADH-ubiquinone oxidoreductase-F iron-sulfur binding region	--	--	GO:0051539	4 iron, 4 sulfur cluster binding	--	--	--	--
Cluster-31803.25450	330.36	3163.08	-3.2592	1.4e-10	1036	552828382	XP_005847471.1	320	1.5e-27	hypothetical protein CHLNCDRAFT_134417 [Chlorella variabilis]>gi|307107125|gb|EFN55369.1| hypothetical protein CHLNCDRAFT_134417 [Chlorella variabilis]	--	--	--	--	--	--	--	--	--	--	--	--	--	--	--	--	--	--	--	--	--	--	--
Cluster-31803.43864	178.24	1896.44	-3.4114	1.43e-10	1535	--	--	--	--	--	--	--	--	--	--	--	--	--	--	--	--	--	--	--	--	--	--	--	--	--	--	--	--
Cluster-31803.92643	198.559	2055.22	-3.3716	1.48e-10	555	552842893	XP_005850686.1	367	2.9e-33	hypothetical protein CHLNCDRAFT_140753 [Chlorella variabilis]>gi|307110348|gb|EFN58584.1| hypothetical protein CHLNCDRAFT_140753 [Chlorella variabilis]	--	--	--	--	--	--	--	--	--	Q6AWU6	185	5.2e-13	Probable thiol methyltransferase 2 OS=Arabidopsis thaliana GN=HOL3 PE=1 SV=1	PF05724	Thiopurine S-methyltransferase (TPMT)	--	--	GO:0008757	S-adenosylmethionine-dependent methyltransferase activity	--	--	--	--
Cluster-31803.100496	9.50386	365.676	-5.2659	1.5e-10	2662	545362204	XP_005646346.1	824	1.4e-85	hypothetical protein COCSUDRAFT_66688 [Coccomyxa subellipsoidea C-169]>gi|384248318|gb|EIE21802.1| hypothetical protein COCSUDRAFT_66688 [Coccomyxa subellipsoidea C-169]	--	--	--	--	--	--	--	--	--	--	--	--	--	--	--	--	--	--	--	--	--	--	--
Cluster-31803.33266	438.482	3964.73	-3.1766	1.61e-10	879	--	--	--	--	--	--	--	--	--	--	--	--	--	--	--	--	--	--	PF08069//PF02948	Ribosomal S13/S15 N-terminal domain//Amelogenin	GO:0006412//GO:0042254//GO:0007275	translation//ribosome biogenesis//multicellular organismal development	GO:0003735	structural constituent of ribosome	GO:0005578//GO:0005840	proteinaceous extracellular matrix//ribosome	--	--
Cluster-31803.15141	21.2179	504.16	-4.5705	1.69e-10	2924	552822123	XP_005846030.1	143	1.5e-06	hypothetical protein CHLNCDRAFT_53437 [Chlorella variabilis]>gi|307105680|gb|EFN53928.1| hypothetical protein CHLNCDRAFT_53437 [Chlorella variabilis]	--	--	--	--	--	--	--	--	--	--	--	--	--	PF00269	Small, acid-soluble spore proteins, alpha/beta type	GO:0006265	DNA topological change	GO:0003690	double-stranded DNA binding	--	--	--	--
Cluster-31803.66838	7.49222	333.569	-5.4765	1.74e-10	1343	552835436	XP_005848972.1	524	4.4e-51	hypothetical protein CHLNCDRAFT_30702 [Chlorella variabilis]>gi|307108630|gb|EFN56870.1| hypothetical protein CHLNCDRAFT_30702 [Chlorella variabilis]			51	4.28e-15		K03809	wrbA	NAD(P)H dehydrogenase (quinone)	http://www.genome.jp/dbget-bin/www_bget?ko:K03809	Q9LSQ5	466	3.3e-45	NAD(P)H dehydrogenase (quinone) FQR1 OS=Arabidopsis thaliana GN=FQR1 PE=1 SV=1	PF03358//PF05924	NADPH-dependent FMN reductase//SAMP Motif	GO:0055114//GO:0045892//GO:0016055	oxidation-reduction process//negative regulation of transcription, DNA-templated//Wnt signaling pathway	GO:0016491//GO:0010181//GO:0008013	oxidoreductase activity//FMN binding//beta-catenin binding	GO:0016342	catenin complex	KOG3135	1,4-benzoquinone reductase-like; Trp repressor binding protein-like/protoplast-secreted protein
Cluster-31803.60443	213.004	0	Inf	1.76e-10	4703	552833193	XP_005848503.1	780	3.2e-80	hypothetical protein CHLNCDRAFT_144977 [Chlorella variabilis]>gi|307108160|gb|EFN56401.1| hypothetical protein CHLNCDRAFT_144977 [Chlorella variabilis]			341	9.4e-176		--	--	--	--	Q55E44	147	1.1e-07	Hybrid signal transduction histidine kinase E OS=Dictyostelium discoideum GN=dhkE PE=3 SV=1	PF00072	Response regulator receiver domain	GO:0000160	phosphorelay signal transduction system	--	--	--	--	--	--
Cluster-31803.13109	41.7264	721.533	-4.112	1.87e-10	2320	--	--	--	--	--	--	--	--	--	--	--	--	--	--	--	--	--	--	PF06039	Malate:quinone oxidoreductase (Mqo)	GO:0006099//GO:0006090	tricarboxylic acid cycle//pyruvate metabolic process	GO:0008924	malate dehydrogenase (quinone) activity	--	--	--	--
Cluster-31803.15446	53.2662	824.878	-3.9529	1.87e-10	803	552826130	XP_005846961.1	284	1.8e-23	expressed protein [Chlorella variabilis]>gi|307106614|gb|EFN54859.1| expressed protein [Chlorella variabilis]	--	--	--	--	--	--	--	--	--	--	--	--	--	PF10462	Peptidase M66	--	--	GO:0004222	metalloendopeptidase activity	--	--	--	--
Cluster-31803.52636	0.35585	187.619	-9.0423	1.93e-10	7920	633912665	KDD76488.1	1817	3.1e-200	sucrose synthase [Helicosporidium sp. ATCC 50920]			759	0		K00695	E2.4.1.13	sucrose synthase	http://www.genome.jp/dbget-bin/www_bget?ko:K00695	Q9M111	1651	7.6e-182	Sucrose synthase 3 OS=Arabidopsis thaliana GN=SUS3 PE=1 SV=1	PF00185//PF00862//PF00424//PF01842//PF13291	Aspartate/ornithine carbamoyltransferase, Asp/Orn binding domain//Sucrose synthase//REV protein (anti-repression trans-activator protein)//ACT domain//ACT domain	GO:0008152//GO:0006355//GO:0005985//GO:0005982//GO:0006520	metabolic process//regulation of transcription, DNA-templated//sucrose metabolic process//starch metabolic process//cellular amino acid metabolic process	GO:0016597//GO:0016157//GO:0003700//GO:0016743	amino acid binding//sucrose synthase activity//transcription factor activity, sequence-specific DNA binding//carboxyl- or carbamoyltransferase activity	GO:0005667//GO:0042025	transcription factor complex//host cell nucleus	--	--
Cluster-31803.81451	2568.2	20696.2	-3.0105	2.03e-10	3450	552844233	XP_005851045.1	548	1.9e-53	hypothetical protein CHLNCDRAFT_50489 [Chlorella variabilis]>gi|307110707|gb|EFN58943.1| hypothetical protein CHLNCDRAFT_50489 [Chlorella variabilis]	--	--	--	--	--	--	--	--	--	--	--	--	--	PF03137	Organic Anion Transporter Polypeptide (OATP) family	GO:0006810	transport	GO:0005215	transporter activity	GO:0016020	membrane	--	--
Cluster-31803.53745	1230.8	0	Inf	2.04e-10	1924	545373086	XP_005650942.1	1018	3.3e-108	hypothetical protein COCSUDRAFT_52321 [Coccomyxa subellipsoidea C-169]>gi|384252923|gb|EIE26398.1| hypothetical protein COCSUDRAFT_52321 [Coccomyxa subellipsoidea C-169]			135	1.24e-61		K14843	PES1, NOP7	pescadillo	http://www.genome.jp/dbget-bin/www_bget?ko:K14843	A8JBB2	968	2.9e-103	Pescadillo homolog OS=Chlamydomonas reinhardtii GN=CHLREDRAFT_206018 PE=3 SV=1	PF16969//PF06732	RNA-binding signal recognition particle 68//Pescadillo N-terminus	GO:0042254//GO:0006614//GO:0006364	ribosome biogenesis//SRP-dependent cotranslational protein targeting to membrane//rRNA processing	GO:0005047//GO:0030942//GO:0008312	signal recognition particle binding//endoplasmic reticulum signal peptide binding//7S RNA binding	GO:0005730//GO:0005786	nucleolus//signal recognition particle, endoplasmic reticulum targeting	KOG2481	Protein required for normal rRNA processing
Cluster-31803.81431	19.1602	484.189	-4.6594	2.12e-10	3843	552844233	XP_005851045.1	548	2.1e-53	hypothetical protein CHLNCDRAFT_50489 [Chlorella variabilis]>gi|307110707|gb|EFN58943.1| hypothetical protein CHLNCDRAFT_50489 [Chlorella variabilis]	--	--	--	--	--	--	--	--	--	--	--	--	--	PF03137	Organic Anion Transporter Polypeptide (OATP) family	GO:0006810	transport	GO:0005215	transporter activity	GO:0016020	membrane	--	--
Cluster-31803.11272	31.6247	622.387	-4.2987	2.17e-10	1683	--	--	--	--	--	--	--	--	--	--	--	--	--	--	--	--	--	--	--	--	--	--	--	--	--	--	--	--
Cluster-31803.14620	379.278	3456.08	-3.1878	2.17e-10	1857	--	--	--	--	--	--	--	--	--	--	--	--	--	--	--	--	--	--	--	--	--	--	--	--	--	--	--	--
Cluster-31803.45352	3.20265	264.32	-6.3669	2.17e-10	3539	551677422	XP_005841464.1	204	1.5e-13	hypothetical protein GUITHDRAFT_63622 [Guillardia theta CCMP2712]>gi|428185632|gb|EKX54484.1| hypothetical protein GUITHDRAFT_63622 [Guillardia theta CCMP2712]	--	--	--	--	--	--	--	--	--	Q03601	171	1.4e-10	RING finger protein nhl-1 OS=Caenorhabditis elegans GN=nhl-1 PE=1 SV=2	PF00253//PF01436//PF00085//PF07660	Ribosomal protein S14p/S29e//NHL repeat//Thioredoxin//Secretin and TonB N terminus short domain	GO:0006412//GO:0045454//GO:0042254	translation//cell redox homeostasis//ribosome biogenesis	GO:0003735//GO:0005515	structural constituent of ribosome//protein binding	GO:0005840//GO:0019867//GO:0005622	ribosome//outer membrane//intracellular	KOG2177	Predicted E3 ubiquitin ligase
Cluster-31803.27183	302.339	2898.23	-3.2609	2.43e-10	1872	552818218	XP_005845139.1	712	9.8e-73	hypothetical protein CHLNCDRAFT_53994 [Chlorella variabilis]>gi|307104785|gb|EFN53037.1| hypothetical protein CHLNCDRAFT_53994 [Chlorella variabilis]			117	1.23e-51		K13101	GPKOW	G patch domain and KOW motifs-containing protein	http://www.genome.jp/dbget-bin/www_bget?ko:K13101	Q9C801	235	2.8e-18	Protein MOS2 OS=Arabidopsis thaliana GN=MOS2 PE=2 SV=1	PF02724//PF01585//PF07440//PF03985	CDC45-like protein//G-patch domain//Caerin 1 protein//Paf1	GO:0006952//GO:0006368//GO:0016570//GO:0006270	defense response//transcription elongation from RNA polymerase II promoter//histone modification//DNA replication initiation	GO:0003676	nucleic acid binding	GO:0016593//GO:0005576	Cdc73/Paf1 complex//extracellular region	--	--
Cluster-31803.84487	0	171.491	#NAME?	2.46e-10	5451	552809753	XP_005843022.1	1150	4.6e-123	hypothetical protein CHLNCDRAFT_141711 [Chlorella variabilis]>gi|307102650|gb|EFN50920.1| hypothetical protein CHLNCDRAFT_141711 [Chlorella variabilis]	--	--	--	--	--	--	--	--	--	P46547	551	1.9e-54	Proline iminopeptidase OS=Aeromonas sobria GN=pip PE=1 SV=3	PF04995//PF08802	Heme exporter protein D (CcmD)//Cytochrome B6-F complex Fe-S subunit	GO:0006118//GO:0015886//GO:0006508//GO:0017004//GO:0055114	obsolete electron transport//heme transport//proteolysis//cytochrome complex assembly//oxidation-reduction process	GO:0051537//GO:0009496//GO:0008233	2 iron, 2 sulfur cluster binding//plastoquinol--plastocyanin reductase activity//peptidase activity	GO:0016021//GO:0009512//GO:0042651	integral component of membrane//cytochrome b6f complex//thylakoid membrane	--	--
Cluster-31803.8554	0	168.263	#NAME?	2.56e-10	2182	--	--	--	--	--	--	--	--	--	--	--	--	--	--	--	--	--	--	--	--	--	--	--	--	--	--	--	--
Cluster-31803.89812	209.09	0	Inf	2.59e-10	3111	552824137	XP_005846530.1	436	1.6e-40	hypothetical protein CHLNCDRAFT_25013, partial [Chlorella variabilis]>gi|307106181|gb|EFN54428.1| hypothetical protein CHLNCDRAFT_25013, partial [Chlorella variabilis]	--	--	--	--	--	--	--	--	--	Q9SRD3	230	1.8e-17	Vacuolar iron transporter homolog 2 OS=Arabidopsis thaliana GN=At1g76800 PE=2 SV=1	PF15324//PF10541	Hedgehog signalling target//Nuclear envelope localisation domain	GO:0007224	smoothened signaling pathway	--	--	GO:0016021	integral component of membrane	--	--
Cluster-31803.18744	0	168.166	#NAME?	2.68e-10	4550	552820217	XP_005845559.1	617	2.5e-61	hypothetical protein CHLNCDRAFT_136719 [Chlorella variabilis]>gi|307105207|gb|EFN53457.1| hypothetical protein CHLNCDRAFT_136719 [Chlorella variabilis]			199	7.87e-97		--	--	--	--	O59737	166	6.9e-10	GTPase-activating protein gyp1 OS=Schizosaccharomyces pombe (strain 972 / ATCC 24843) GN=gyp1 PE=3 SV=1	PF02311//PF00326//PF05577	AraC-like ligand binding domain//Prolyl oligopeptidase family//Serine carboxypeptidase S28	GO:0006508//GO:0006355	proteolysis//regulation of transcription, DNA-templated	GO:0008236	serine-type peptidase activity	--	--	KOG1092	Ypt/Rab-specific GTPase-activating protein GYP1
Cluster-31803.69734	37.8678	681.345	-4.1693	2.8e-10	6247	552828061	XP_005847382.1	1286	9e-139	hypothetical protein CHLNCDRAFT_35526 [Chlorella variabilis]>gi|307107036|gb|EFN55280.1| hypothetical protein CHLNCDRAFT_35526 [Chlorella variabilis]			317	2.75e-162		K08568	CTSZ	cathepsin X	http://www.genome.jp/dbget-bin/www_bget?ko:K08568	Q9UBR2	858	5.4e-90	Cathepsin Z OS=Homo sapiens GN=CTSZ PE=1 SV=1	PF06426//PF12300//PF00112//PF03051//PF16934	Serine acetyltransferase, N-terminal//Protein of unknown function (DUF3628)//Papain family cysteine protease//Peptidase C1-like family//Two-component Enterococcus faecalis cytolysin (EFC)	GO:0042967//GO:0006535//GO:0050830//GO:0006534//GO:0006508	acyl-carrier-protein biosynthetic process//cysteine biosynthetic process from serine//defense response to Gram-positive bacterium//cysteine metabolic process//proteolysis	GO:0016817//GO:0009001//GO:0008234//GO:0004197	hydrolase activity, acting on acid anhydrides//serine O-acetyltransferase activity//cysteine-type peptidase activity//cysteine-type endopeptidase activity	GO:0005737	cytoplasm	--	--
Cluster-31803.101560	299.921	3.53495	6.4067	2.89e-10	2160	552821458	XP_005845854.1	846	3.3e-88	hypothetical protein CHLNCDRAFT_58436 [Chlorella variabilis]>gi|307105503|gb|EFN53752.1| hypothetical protein CHLNCDRAFT_58436 [Chlorella variabilis]			274	7.52e-139		K08077	NUDT14	UDP-sugar diphosphatase	http://www.genome.jp/dbget-bin/www_bget?ko:K08077	Q05B60	330	3.1e-29	Uridine diphosphate glucose pyrophosphatase OS=Bos taurus GN=NUDT14 PE=2 SV=1	PF00293	NUDIX domain	--	--	GO:0046872//GO:0016787//GO:0016818	metal ion binding//hydrolase activity//hydrolase activity, acting on acid anhydrides, in phosphorus-containing anhydrides	--	--	KOG4432	Uncharacterized NUDIX family hydrolase
Cluster-31803.59153	6477.11	50275.4	-2.9564	2.94e-10	282	552809140	XP_005842870.1	143	1.4e-07	hypothetical protein CHLNCDRAFT_55572 [Chlorella variabilis]>gi|307102485|gb|EFN50758.1| hypothetical protein CHLNCDRAFT_55572 [Chlorella variabilis]	--	--	--	--	--	--	--	--	--	--	--	--	--	--	--	--	--	--	--	--	--	--	--
Cluster-31803.96260	16.0133	436.482	-4.7686	3e-10	3629	552844233	XP_005851045.1	548	2e-53	hypothetical protein CHLNCDRAFT_50489 [Chlorella variabilis]>gi|307110707|gb|EFN58943.1| hypothetical protein CHLNCDRAFT_50489 [Chlorella variabilis]	--	--	--	--	--	--	--	--	--	--	--	--	--	PF03137	Organic Anion Transporter Polypeptide (OATP) family	GO:0006810	transport	GO:0005215	transporter activity	GO:0016020	membrane	--	--
Cluster-31803.66631	4.75193	287.8	-5.9204	3.07e-10	3396	--	--	--	--	--	--	--	--	--	--	--	--	--	--	--	--	--	--	PF04706	Dickkopf N-terminal cysteine-rich region	GO:0007275//GO:0030178	multicellular organismal development//negative regulation of Wnt signaling pathway	--	--	GO:0005576	extracellular region	--	--
Cluster-31803.66491	658.785	38.4234	4.0997	3.19e-10	4744	552831523	XP_005848155.1	1292	1.4e-139	hypothetical protein CHLNCDRAFT_31039 [Chlorella variabilis]>gi|307107811|gb|EFN56053.1| hypothetical protein CHLNCDRAFT_31039 [Chlorella variabilis]			499	0		K15276	SLC35B2, PAPST1	solute carrier family 35 (adenosine 3'-phospho 5'-phosphosulfate transporter), member B2	http://www.genome.jp/dbget-bin/www_bget?ko:K15276	Q6NMB6	713	2.7e-73	UDP-galactose/UDP-glucose transporter 5B OS=Arabidopsis thaliana GN=At5g59740 PE=2 SV=1	PF02565//PF00892//PF08449	Recombination protein O C terminal//EamA-like transporter family//UAA transporter family	GO:0006281//GO:0006310//GO:0055085	DNA repair//DNA recombination//transmembrane transport	--	--	GO:0016021//GO:0016020	integral component of membrane//membrane	KOG1581	UDP-galactose transporter related protein
Cluster-31803.39123	0	167.288	#NAME?	3.34e-10	1154	552845315	XP_005851318.1	469	9.1e-45	expressed protein [Chlorella variabilis]>gi|307110981|gb|EFN59216.1| expressed protein [Chlorella variabilis]	--	--	--	--	--	--	--	--	--	--	--	--	--	PF04625	DEC-1 protein, N-terminal region	GO:0007304	chorion-containing eggshell formation	GO:0005213	structural constituent of chorion	GO:0042600//GO:0005576	chorion//extracellular region	--	--
Cluster-31803.77772	311.349	2816.71	-3.1774	3.64e-10	940	552818162	XP_005845127.1	617	5.1e-62	hypothetical protein CHLNCDRAFT_137523 [Chlorella variabilis]>gi|307104773|gb|EFN53025.1| hypothetical protein CHLNCDRAFT_137523 [Chlorella variabilis]			45	6.4e-12		--	--	--	--	P77526	342	5.5e-31	Disulfide-bond oxidoreductase YfcG OS=Escherichia coli (strain K12) GN=yfcG PE=1 SV=1	PF13409//PF13417//PF02798	Glutathione S-transferase, N-terminal domain//Glutathione S-transferase, N-terminal domain//Glutathione S-transferase, N-terminal domain	--	--	GO:0005515	protein binding	--	--	KOG0867	Glutathione S-transferase
Cluster-31803.46041	404.647	0	Inf	3.67e-10	6069	552846871	XP_005851725.1	1289	3.9e-139	hypothetical protein CHLNCDRAFT_133066 [Chlorella variabilis]>gi|307111389|gb|EFN59623.1| hypothetical protein CHLNCDRAFT_133066 [Chlorella variabilis]			539	0		K10536	aguA	agmatine deiminase	http://www.genome.jp/dbget-bin/www_bget?ko:K10536	Q8GWW7	1006	3.6e-107	Agmatine deiminase OS=Arabidopsis thaliana GN=AIH PE=1 SV=2	PF03462//PF16326//PF04371//PF00704//PF00795//PF00472	PCRF domain//ABC transporter C-terminal domain//Porphyromonas-type peptidyl-arginine deiminase//Glycosyl hydrolases family 18//Carbon-nitrogen hydrolase//RF-1 domain	GO:0006449//GO:0006415//GO:0006807//GO:0009446//GO:0005975	regulation of translational termination//translational termination//nitrogen compound metabolic process//putrescine biosynthetic process//carbohydrate metabolic process	GO:0004668//GO:0004553//GO:0016810//GO:0016813//GO:0016149//GO:0003677//GO:0003747	protein-arginine deiminase activity//hydrolase activity, hydrolyzing O-glycosyl compounds//hydrolase activity, acting on carbon-nitrogen (but not peptide) bonds//hydrolase activity, acting on carbon-nitrogen (but not peptide) bonds, in linear amidines//translation release factor activity, codon specific//DNA binding//translation release factor activity	GO:0018444//GO:0005737//GO:0005840	translation release factor complex//cytoplasm//ribosome	--	--
Cluster-31803.16955	0	202.859	#NAME?	4.26e-10	5791	760442411	XP_011398274.1	591	3.3e-58	Adenine nucleotide transporter BT1, chloroplastic/amyloplastic/mitochondrial [Auxenochlorella protothecoides]>gi|675352941|gb|KFM25381.1| Adenine nucleotide transporter BT1, chloroplastic/amyloplastic/mitochondrial [Auxenochlorella protothecoides]	--	--	--	--	--	--	--	--	--	P29518	299	3.3e-25	Adenine nucleotide transporter BT1, chloroplastic/amyloplastic/mitochondrial OS=Zea mays GN=BT1 PE=1 SV=1	PF02362//PF07267	B3 DNA binding domain//Nucleopolyhedrovirus capsid protein P87	--	--	GO:0003677	DNA binding	GO:0019028	viral capsid	KOG0036	Predicted mitochondrial carrier protein
Cluster-31803.49927	33.8058	623.883	-4.2059	4.84e-10	3933	552838007	XP_005849486.1	676	3.1e-68	hypothetical protein CHLNCDRAFT_142788 [Chlorella variabilis]>gi|307109146|gb|EFN57384.1| hypothetical protein CHLNCDRAFT_142788 [Chlorella variabilis]			96	1.23e-39		--	--	--	--	A6Q4R8	136	1.8e-06	GTPase Der OS=Nitratiruptor sp. (strain SB155-2) GN=der PE=3 SV=1	PF11791//PF02421//PF01926//PF00071	Aconitate B N-terminal domain//Ferrous iron transport protein B//50S ribosome-binding GTPase//Ras family	GO:0006099//GO:0015684//GO:0046487//GO:0019643//GO:0007264	tricarboxylic acid cycle//ferrous iron transport//glyoxylate metabolic process//reductive tricarboxylic acid cycle//small GTPase mediated signal transduction	GO:0015093//GO:0005525//GO:0003994	ferrous iron transmembrane transporter activity//GTP binding//aconitate hydratase activity	GO:0016021	integral component of membrane	--	--
Cluster-31803.58200	81.7559	1046.23	-3.6777	4.85e-10	1624	545371315	XP_005650231.1	639	2.5e-64	hypothetical protein COCSUDRAFT_64779 [Coccomyxa subellipsoidea C-169]>gi|384252211|gb|EIE25687.1| hypothetical protein COCSUDRAFT_64779 [Coccomyxa subellipsoidea C-169]	--	--	--	--	--	--	--	--	--	A1L4X0	412	7.3e-39	Protein CLT2, chloroplastic OS=Arabidopsis thaliana GN=CLT2 PE=2 SV=1	PF04142//PF16934	Nucleotide-sugar transporter//Two-component Enterococcus faecalis cytolysin (EFC)	GO:0050830//GO:0008643	defense response to Gram-positive bacterium//carbohydrate transport	GO:0005351	sugar:proton symporter activity	GO:0016021//GO:0000139	integral component of membrane//Golgi membrane	--	--
Cluster-31803.41396	202.805	0	Inf	4.86e-10	1945	760442419	XP_011398278.1	362	3.9e-32	Branchpoint-bridging protein [Auxenochlorella protothecoides]>gi|675352945|gb|KFM25385.1| Branchpoint-bridging protein [Auxenochlorella protothecoides]			40	8.13e-09		K04715	E2.7.1.138, CERK	ceramide kinase	http://www.genome.jp/dbget-bin/www_bget?ko:K04715	C0LT23	207	5.2e-15	Ceramide kinase OS=Oryza sativa subsp. japonica GN=CERK PE=1 SV=1	PF00127//PF00781	Copper binding proteins, plastocyanin/azurin family//Diacylglycerol kinase catalytic domain	GO:0006118	obsolete electron transport	GO:0016301//GO:0009055//GO:0005507	kinase activity//electron carrier activity//copper ion binding	--	--	KOG1115	Ceramide kinase
Cluster-31803.85329	2241.33	16894.7	-2.9141	5.39e-10	1344	--	--	--	--	--	--	--	--	--	--	--	--	--	--	--	--	--	--	--	--	--	--	--	--	--	--	--	--
Cluster-31803.49924	389.544	3350.3	-3.1044	6.24e-10	2375	552838007	XP_005849486.1	1150	2e-123	hypothetical protein CHLNCDRAFT_142788 [Chlorella variabilis]>gi|307109146|gb|EFN57384.1| hypothetical protein CHLNCDRAFT_142788 [Chlorella variabilis]			351	0		--	--	--	--	A6Q4R8	136	1.1e-06	GTPase Der OS=Nitratiruptor sp. (strain SB155-2) GN=der PE=3 SV=1	PF02421//PF00071//PF01926//PF08926	Ferrous iron transport protein B//Ras family//50S ribosome-binding GTPase//Domain of unknown function (DUF1908)	GO:0009069//GO:0015684//GO:0016310//GO:0006468//GO:0007264	serine family amino acid metabolic process//ferrous iron transport//phosphorylation//protein phosphorylation//small GTPase mediated signal transduction	GO:0015093//GO:0004674//GO:0005525//GO:0000287//GO:0005488//GO:0005524	ferrous iron transmembrane transporter activity//protein serine/threonine kinase activity//GTP binding//magnesium ion binding//binding//ATP binding	GO:0016021	integral component of membrane	--	--
Cluster-31803.59157	17960	133401	-2.8929	6.79e-10	379	552809140	XP_005842870.1	389	5.6e-36	hypothetical protein CHLNCDRAFT_55572 [Chlorella variabilis]>gi|307102485|gb|EFN50758.1| hypothetical protein CHLNCDRAFT_55572 [Chlorella variabilis]	--	--	--	--	--	--	--	--	--	Q9NQ36	151	3.1e-09	Signal peptide, CUB and EGF-like domain-containing protein 2 OS=Homo sapiens GN=SCUBE2 PE=2 SV=2	PF07562//PF00020	Nine Cysteines Domain of family 3 GPCR//TNFR/NGFR cysteine-rich region	GO:0007186	G-protein coupled receptor signaling pathway	GO:0005515//GO:0004930	protein binding//G-protein coupled receptor activity	--	--	KOG1217	Fibrillins and related proteins containing Ca2+-binding EGF-like domains
Cluster-31803.40971	9.86939	351.847	-5.1558	7.3e-10	1345	760443975	XP_011399056.1	176	1e-10	hypothetical protein F751_4653 [Auxenochlorella protothecoides]>gi|675353720|gb|KFM26160.1| hypothetical protein F751_4653 [Auxenochlorella protothecoides]	--	--	--	--	--	--	--	--	--	--	--	--	--	PF03159	XRN 5'-3' exonuclease N-terminus	--	--	GO:0004527//GO:0003676	exonuclease activity//nucleic acid binding	--	--	--	--
Cluster-31803.29306	510.308	23.4805	4.4418	8.2e-10	3832	552831248	XP_005848086.1	680	1e-68	hypothetical protein CHLNCDRAFT_145348 [Chlorella variabilis]>gi|307107742|gb|EFN55984.1| hypothetical protein CHLNCDRAFT_145348 [Chlorella variabilis]	--	--	--	--	--	--	--	--	--	--	--	--	--	PF03094	Mlo family	GO:0006952	defense response	--	--	GO:0016021	integral component of membrane	--	--
Cluster-31803.103900	0	160.315	#NAME?	8.6e-10	1255	--	--	--	--	--	--	--	--	--	--	--	--	--	--	--	--	--	--	PF05206	Methyltransferase TRM13	GO:0008033	tRNA processing	GO:0008168	methyltransferase activity	--	--	--	--
Cluster-31803.80012	233.803	2143.68	-3.1967	8.9e-10	3154	552810930	XP_005843330.1	740	9.4e-76	hypothetical protein CHLNCDRAFT_141231 [Chlorella variabilis]>gi|307102963|gb|EFN51228.1| hypothetical protein CHLNCDRAFT_141231 [Chlorella variabilis]	--	--	--	--	--	K00472	E1.14.11.2	prolyl 4-hydroxylase	http://www.genome.jp/dbget-bin/www_bget?ko:K00472	Q8L970	367	2.3e-33	Probable prolyl 4-hydroxylase 7 OS=Arabidopsis thaliana GN=P4H7 PE=2 SV=1	PF03171//PF13640	2OG-Fe(II) oxygenase superfamily//2OG-Fe(II) oxygenase superfamily	GO:0055114	oxidation-reduction process	GO:0016706//GO:0031418//GO:0005506//GO:0016491	oxidoreductase activity, acting on paired donors, with incorporation or reduction of molecular oxygen, 2-oxoglutarate as one donor, and incorporation of one atom each of oxygen into both donors//L-ascorbic acid binding//iron ion binding//oxidoreductase activity	--	--	--	--
Cluster-31803.13532	566.562	33.1496	4.0952	1.08e-09	1461	633903514	KDD72143.1	398	2e-36	hypothetical protein H632_c3796p0 [Helicosporidium sp. ATCC 50920]			36	1.02e-06		K09680	coaW	type II pantothenate kinase	http://www.genome.jp/dbget-bin/www_bget?ko:K09680	Q8L5Y9	282	7.8e-24	Pantothenate kinase 2 OS=Arabidopsis thaliana GN=PANK2 PE=1 SV=2	PF04577	Protein of unknown function (DUF563)	--	--	GO:0016757	transferase activity, transferring glycosyl groups	--	--	KOG4584	Uncharacterized conserved protein
Cluster-31803.74893	767.653	51.7029	3.8921	1.11e-09	4245	552838366	XP_005849562.1	1067	1.5e-113	hypothetical protein CHLNCDRAFT_57252 [Chlorella variabilis]>gi|307109222|gb|EFN57460.1| hypothetical protein CHLNCDRAFT_57252 [Chlorella variabilis]	--	--	--	--	--	--	--	--	--	Q756J5	452	4.4e-43	Pre-rRNA-processing protein ESF1 OS=Ashbya gossypii (strain ATCC 10895 / CBS 109.51 / FGSC 9923 / NRRL Y-1056) GN=ESF1 PE=3 SV=2	PF00527//PF04434//PF08159	E7 protein, Early protein//SWIM zinc finger//NUC153 domain	GO:0006355	regulation of transcription, DNA-templated	GO:0008270//GO:0003677//GO:0003700	zinc ion binding//DNA binding//transcription factor activity, sequence-specific DNA binding	GO:0005634//GO:0005667	nucleus//transcription factor complex	KOG2318	Uncharacterized conserved protein
Cluster-31803.103495	883.326	6822.58	-2.9493	1.14e-09	3086	302847466	XP_002955267.1	148	4.1e-07	hypothetical protein VOLCADRAFT_96167 [Volvox carteri f. nagariensis]>gi|300259339|gb|EFJ43567.1| hypothetical protein VOLCADRAFT_96167 [Volvox carteri f. nagariensis]	--	--	--	--	--	--	--	--	--	--	--	--	--	PF00413//PF10462	Matrixin//Peptidase M66	GO:0006508	proteolysis	GO:0008270//GO:0004222	zinc ion binding//metalloendopeptidase activity	GO:0031012	extracellular matrix	--	--
Cluster-31803.13017	1226.35	9505.36	-2.9544	1.17e-09	1830	552824549	XP_005846619.1	708	2.8e-72	hypothetical protein CHLNCDRAFT_135242 [Chlorella variabilis]>gi|307106271|gb|EFN54517.1| hypothetical protein CHLNCDRAFT_135242 [Chlorella variabilis]	--	--	--	--	--	--	--	--	--	P29143	271	1.8e-22	Halolysin OS=Natrialba asiatica (strain ATCC 700177 / DSM 12278 / JCM 9576 / FERM P-10747 / NBRC 102637 / 172P1) GN=hly PE=1 SV=1	PF00082	Subtilase family	GO:0006508	proteolysis	GO:0004252	serine-type endopeptidase activity	--	--	--	--
Cluster-31803.74076	1783.3	13617.6	-2.9329	1.18e-09	972	552841959	XP_005850444.1	1004	7e-107	hypothetical protein CHLNCDRAFT_57139 [Chlorella variabilis]>gi|307110105|gb|EFN58342.1| hypothetical protein CHLNCDRAFT_57139 [Chlorella variabilis]			241	7.34e-121		K14190	VTC2_5	GDP-L-galactose phosphorylase	http://www.genome.jp/dbget-bin/www_bget?ko:K14190	Q8RWE8	390	1.6e-36	GDP-L-galactose phosphorylase 1 OS=Arabidopsis thaliana GN=VTC2 PE=1 SV=1	--	--	--	--	--	--	--	--	--	--
Cluster-31803.85049	9.13832	326.528	-5.1591	1.18e-09	2878	552846181	XP_005851548.1	907	3.7e-95	hypothetical protein CHLNCDRAFT_29581 [Chlorella variabilis]>gi|307111211|gb|EFN59446.1| hypothetical protein CHLNCDRAFT_29581 [Chlorella variabilis]			57	4.29e-18		--	--	--	--	Q2RQN9	277	5.8e-23	Hydroxylamine reductase OS=Rhodospirillum rubrum (strain ATCC 11170 / ATH 1.1.1 / DSM 467 / LMG 4362 / NCIB 8255 / S1) GN=hcp PE=3 SV=1	PF03063	Prismane/CO dehydrogenase family	GO:0055114	oxidation-reduction process	GO:0016491	oxidoreductase activity	--	--	--	--
Cluster-31803.44563	2395.89	275.989	3.1179	1.25e-09	1940	552823840	XP_005846458.1	412	6.2e-38	hypothetical protein CHLNCDRAFT_135626 [Chlorella variabilis]>gi|307106109|gb|EFN54356.1| hypothetical protein CHLNCDRAFT_135626 [Chlorella variabilis]	--	--	--	--	--	K13207	CUGBP, BRUNOL, CELF	CUG-BP- and ETR3-like factor	http://www.genome.jp/dbget-bin/www_bget?ko:K13207	Q8LFS6	179	9.1e-12	RNA-binding protein BRN1 OS=Arabidopsis thaliana GN=BRN1 PE=2 SV=1	PF00076	RNA recognition motif. (a.k.a. RRM, RBD, or RNP domain)	--	--	GO:0003723//GO:0003676//GO:0000166	RNA binding//nucleic acid binding//nucleotide binding	--	--	KOG0144	RNA-binding protein CUGBP1/BRUNO (RRM superfamily)
Cluster-31803.24932	432.033	3572.1	-3.0476	1.25e-09	2476	552812470	XP_005843710.1	215	5.5e-15	expressed protein [Chlorella variabilis]>gi|307103347|gb|EFN51608.1| expressed protein [Chlorella variabilis]	--	--	--	--	--	--	--	--	--	--	--	--	--	PF00167	Fibroblast growth factor	GO:0040007//GO:0007165//GO:0008283	growth//signal transduction//cell proliferation	GO:0008083	growth factor activity	--	--	--	--
Cluster-31803.13139	0	539.683	#NAME?	1.32e-09	4606	302830844	XP_002946988.1	715	1.1e-72	serine/threonine protein kinase 15 [Volvox carteri f. nagariensis]>gi|300268032|gb|EFJ52214.1| serine/threonine protein kinase 15, partial [Volvox carteri f. nagariensis]			84	6.75e-33		K08789	MAST	microtubule-associated serine/threonine kinase	http://www.genome.jp/dbget-bin/www_bget?ko:K08789	F4J6F6	630	1.1e-63	Probable serine/threonine protein kinase IREH1 OS=Arabidopsis thaliana GN=IREH1 PE=1 SV=1	PF00069//PF07714//PF00935	Protein kinase domain//Protein tyrosine kinase//Ribosomal protein L44	GO:0016310//GO:0009069//GO:0006468//GO:0006412//GO:0042254	phosphorylation//serine family amino acid metabolic process//protein phosphorylation//translation//ribosome biogenesis	GO:0003735//GO:0004672//GO:0004674//GO:0005524	structural constituent of ribosome//protein kinase activity//protein serine/threonine kinase activity//ATP binding	GO:0005622//GO:0005840	intracellular//ribosome	KOG0606	Microtubule-associated serine/threonine kinase and related proteins
Cluster-31803.16632	555.187	4430.99	-2.9966	1.34e-09	769	552819596	XP_005845446.1	375	4.8e-34	hypothetical protein CHLNCDRAFT_137072 [Chlorella variabilis]>gi|307105093|gb|EFN53344.1| hypothetical protein CHLNCDRAFT_137072 [Chlorella variabilis]	--	--	--	--	--	--	--	--	--	--	--	--	--	PF05993	Reovirus major virion structural protein Mu-1/Mu-1C (M2)	GO:0046718//GO:0009405	viral entry into host cell//pathogenesis	GO:0046812	host cell surface binding	GO:0009986//GO:0039624	cell surface//viral outer capsid	--	--
Cluster-31803.81462	302.986	2783.64	-3.1997	1.37e-09	1419	552844233	XP_005851045.1	223	3.8e-16	hypothetical protein CHLNCDRAFT_50489 [Chlorella variabilis]>gi|307110707|gb|EFN58943.1| hypothetical protein CHLNCDRAFT_50489 [Chlorella variabilis]	--	--	--	--	--	--	--	--	--	--	--	--	--	PF01758	Sodium Bile acid symporter family	--	--	--	--	GO:0016020	membrane	--	--
Cluster-31803.69985	1034.78	7783.98	-2.9112	1.4e-09	3232	552844786	XP_005851172.1	1220	2.1e-131	hypothetical protein CHLNCDRAFT_137807 [Chlorella variabilis]>gi|307110835|gb|EFN59070.1| hypothetical protein CHLNCDRAFT_137807 [Chlorella variabilis]			285	8.69e-145		--	--	--	--	Q9Y4C4	132	4.3e-06	Malignant fibrous histiocytoma-amplified sequence 1 OS=Homo sapiens GN=MFHAS1 PE=1 SV=2	PF13855//PF00560	Leucine rich repeat//Leucine Rich Repeat	--	--	GO:0005515	protein binding	--	--	KOG0619	FOG: Leucine rich repeat
Cluster-31803.103529	364.359	3628.66	-3.316	1.43e-09	2100	159477719	XP_001696956.1	425	2.1e-39	type I metacaspase [Chlamydomonas reinhardtii]>gi|158274868|gb|EDP00648.1| type I metacaspase [Chlamydomonas reinhardtii]	--	--	--	--	--	--	--	--	--	Q7XJE5	378	8.3e-35	Metacaspase-2 OS=Arabidopsis thaliana GN=AMC2 PE=1 SV=1	PF00656	Caspase domain	GO:0006508	proteolysis	GO:0004197	cysteine-type endopeptidase activity	--	--	--	--
Cluster-31803.104534	240.605	2197.32	-3.191	1.43e-09	853	--	--	--	--	--	--	--	--	--	--	--	--	--	--	--	--	--	--	--	--	--	--	--	--	--	--	--	--
Cluster-31803.45323	27356.7	230689	-3.076	1.44e-09	824	552838242	XP_005849536.1	638	1.6e-64	hypothetical protein CHLNCDRAFT_142903 [Chlorella variabilis]>gi|307109196|gb|EFN57434.1| hypothetical protein CHLNCDRAFT_142903 [Chlorella variabilis]	--	--	--	--	--	--	--	--	--	Q6DDW2	154	3.1e-09	UPF0577 protein KIAA1324-like homolog OS=Xenopus laevis GN=kiaa1324l PE=2 SV=1	PF00020//PF07562	TNFR/NGFR cysteine-rich region//Nine Cysteines Domain of family 3 GPCR	GO:0007186	G-protein coupled receptor signaling pathway	GO:0004930//GO:0005515	G-protein coupled receptor activity//protein binding	--	--	--	--
Cluster-31803.59174	62592.1	438496	-2.8085	1.45e-09	1218	552832502	XP_005848360.1	1492	2.3e-163	hypothetical protein CHLNCDRAFT_145099 [Chlorella variabilis]>gi|307108017|gb|EFN56258.1| hypothetical protein CHLNCDRAFT_145099 [Chlorella variabilis]			290	5.35e-148		--	--	--	--	Q5G872	192	1.8e-13	Signal peptide, CUB and EGF-like domain-containing protein 2 OS=Danio rerio GN=scube2 PE=2 SV=1	PF00020//PF07562	TNFR/NGFR cysteine-rich region//Nine Cysteines Domain of family 3 GPCR	GO:0007186	G-protein coupled receptor signaling pathway	GO:0004930//GO:0005515	G-protein coupled receptor activity//protein binding	--	--	KOG1217	Fibrillins and related proteins containing Ca2+-binding EGF-like domains
Cluster-31803.22915	2261.88	247.135	3.1942	1.5e-09	1067	--	--	--	--	--	--	--	--	--	--	--	--	--	--	--	--	--	--	--	--	--	--	--	--	--	--	--	--
Cluster-31803.64591	2.88553	406.652	-7.1388	1.52e-09	3456	552825715	XP_005846882.1	488	1.7e-46	hypothetical protein CHLNCDRAFT_12290, partial [Chlorella variabilis]>gi|307106535|gb|EFN54780.1| hypothetical protein CHLNCDRAFT_12290, partial [Chlorella variabilis]	--	--	--	--	--	K08360	CYB561	cytochrome b-561	http://www.genome.jp/dbget-bin/www_bget?ko:K08360	Q6DDR3	219	3.7e-16	Cytochrome b reductase 1 OS=Xenopus laevis GN=cybrd1 PE=2 SV=2	PF03188//PF01292//PF00033//PF03153	Eukaryotic cytochrome b561//Prokaryotic cytochrome b561//Cytochrome b/b6/petB//Transcription factor IIA, alpha/beta subunit	GO:0006367//GO:0006118//GO:0022904	transcription initiation from RNA polymerase II promoter//obsolete electron transport//respiratory electron transport chain	GO:0009055	electron carrier activity	GO:0016021//GO:0016020//GO:0005672	integral component of membrane//membrane//transcription factor TFIIA complex	KOG1619	Cytochrome b
Cluster-31803.21726	552.308	4377.54	-2.9866	1.61e-09	3633	552820901	XP_005845704.1	758	8.8e-78	hypothetical protein CHLNCDRAFT_136834 [Chlorella variabilis]>gi|307105352|gb|EFN53602.1| hypothetical protein CHLNCDRAFT_136834 [Chlorella variabilis]			102	5.24e-43		K14510	CTR1	serine/threonine-protein kinase CTR1	http://www.genome.jp/dbget-bin/www_bget?ko:K14510	Q54H46	437	2.1e-41	Probable serine/threonine-protein kinase drkA OS=Dictyostelium discoideum GN=drkA PE=3 SV=1	PF00069//PF13855//PF01186//PF07714	Protein kinase domain//Leucine rich repeat//Lysyl oxidase//Protein tyrosine kinase	GO:0055114//GO:0006468	oxidation-reduction process//protein phosphorylation	GO:0005515//GO:0004672//GO:0005507//GO:0016641//GO:0005524	protein binding//protein kinase activity//copper ion binding//oxidoreductase activity, acting on the CH-NH2 group of donors, oxygen as acceptor//ATP binding	--	--	--	--
Cluster-31803.38021	130.28	1325.78	-3.3472	1.61e-09	493	552848393	XP_005852090.1	401	3e-37	hypothetical protein CHLNCDRAFT_49444 [Chlorella variabilis]>gi|307111754|gb|EFN59988.1| hypothetical protein CHLNCDRAFT_49444 [Chlorella variabilis]			134	1.09e-61		K00472	E1.14.11.2	prolyl 4-hydroxylase	http://www.genome.jp/dbget-bin/www_bget?ko:K00472	Q8LAN3	179	2.3e-12	Probable prolyl 4-hydroxylase 4 OS=Arabidopsis thaliana GN=P4H4 PE=2 SV=1	PF13640	2OG-Fe(II) oxygenase superfamily	GO:0055114	oxidation-reduction process	GO:0031418//GO:0016706//GO:0016491//GO:0005506	L-ascorbic acid binding//oxidoreductase activity, acting on paired donors, with incorporation or reduction of molecular oxygen, 2-oxoglutarate as one donor, and incorporation of one atom each of oxygen into both donors//oxidoreductase activity//iron ion binding	--	--	--	--
Cluster-31803.74538	415.894	17.3282	4.585	1.98e-09	3278	552846784	XP_005851701.1	1161	1.5e-124	hypothetical protein CHLNCDRAFT_132993 [Chlorella variabilis]>gi|307111365|gb|EFN59599.1| hypothetical protein CHLNCDRAFT_132993 [Chlorella variabilis]			286	2.45e-145		K12589	RRP42, EXOSC7	exosome complex component RRP42	http://www.genome.jp/dbget-bin/www_bget?ko:K12589	Q15024	550	1.5e-54	Exosome complex component RRP42 OS=Homo sapiens GN=EXOSC7 PE=1 SV=3	PF06459//PF00841//PF02724//PF06632//PF14631//PF02932//PF05132//PF08597//PF10104//PF01479//PF05793//PF01698//PF12326//PF00849//PF05238	Ryanodine Receptor TM 4-6//Sperm histone P2//CDC45-like protein//DNA double-strand break repair and V(D)J recombination protein XRCC4//Fanconi anaemia protein FancD2 nuclease//Neurotransmitter-gated ion-channel transmembrane region//RNA polymerase III RPC4//Translation initiation factor eIF3 subunit//Di-sulfide bridge nucleocytoplasmic transport domain//S4 domain//Transcription initiation factor …	GO:0006446//GO:0006310//GO:0006144//GO:0006406//GO:0007059//GO:0006816//GO:0006355//GO:0009451//GO:0006281//GO:0006998//GO:0006383//GO:0001522//GO:0006874//GO:0034599//GO:0006811//GO:0032968//GO:0006270//GO:0006611//GO:0007283//GO:0006367//GO:0006206//GO:0034508//GO:0006351//GO:0006302	regulation of translational initiation//DNA recombination//purine nucleobase metabolic process//mRNA export from nucleus//chromosome segregation//calcium ion transport//regulation of transcription, DNA-templated//RNA modification//DNA repair//nuclear envelope organization//transcription from RNA polymerase III promoter//pseudouridine synthesis//cellular calcium ion homeostasis//cellular response …	GO:0009982//GO:0003677//GO:0003723//GO:0005219//GO:0003899//GO:0003743	pseudouridine synthase activity//DNA binding//RNA binding//ryanodine-sensitive calcium-release channel activity//DNA-directed RNA polymerase activity//translation initiation factor activity	GO:0005666//GO:0005737//GO:0016020//GO:0005634//GO:0005852//GO:0005789//GO:0031965//GO:0005840//GO:0005730//GO:0005622//GO:0016021//GO:0000786	DNA-directed RNA polymerase III complex//cytoplasm//membrane//nucleus//eukaryotic translation initiation factor 3 complex//endoplasmic reticulum membrane//nuclear membrane//ribosome//nucleolus//intracellular//integral component of membrane//nucleosome	KOG1612	Exosomal 3'-5' exoribonuclease complex, subunit Rrp42
Cluster-31803.11853	13.273	914.586	-6.1066	2.03e-09	2479	552810604	XP_005843247.1	1337	4.4e-145	hypothetical protein CHLNCDRAFT_55316 [Chlorella variabilis]>gi|307102879|gb|EFN51145.1| hypothetical protein CHLNCDRAFT_55316 [Chlorella variabilis]			41	2.89e-09		--	--	--	--	O51055	322	3e-28	Uncharacterized protein BB_0024 OS=Borrelia burgdorferi (strain ATCC 35210 / B31 / CIP 102532 / DSM 4680) GN=BB_0024 PE=4 SV=1	PF07995	Glucose / Sorbosone dehydrogenase	GO:0005975	carbohydrate metabolic process	GO:0048038//GO:0016901	quinone binding//oxidoreductase activity, acting on the CH-OH group of donors, quinone or similar compound as acceptor	--	--	--	--
Cluster-31803.27949	1100.11	85.428	3.6868	2.03e-09	2478	552841551	XP_005850339.1	1048	1.4e-111	hypothetical protein CHLNCDRAFT_34378 [Chlorella variabilis]>gi|307110000|gb|EFN58237.1| hypothetical protein CHLNCDRAFT_34378 [Chlorella variabilis]			177	7.23e-85		--	--	--	--	Q5F478	191	4.7e-13	Serine/threonine-protein phosphatase 6 regulatory ankyrin repeat subunit B OS=Gallus gallus GN=ANKRD44 PE=2 SV=1	PF00023//PF13606	Ankyrin repeat//Ankyrin repeat	--	--	GO:0005515	protein binding	--	--	KOG4177	Ankyrin
Cluster-31803.72505	346.75	10.5476	5.0389	2.16e-09	7633	552813429	XP_005843947.1	1218	8.5e-131	hypothetical protein CHLNCDRAFT_27604 [Chlorella variabilis]>gi|307103586|gb|EFN51845.1| hypothetical protein CHLNCDRAFT_27604 [Chlorella variabilis]			255	9.81e-128		K00729	ALG5	dolichyl-phosphate beta-glucosyltransferase	http://www.genome.jp/dbget-bin/www_bget?ko:K00729	Q9FPJ8	732	2.7e-75	Polyadenylate-binding protein RBP45A OS=Arabidopsis thaliana GN=RBP45A PE=2 SV=1	PF16367//PF08777//PF06058//PF05773//PF00076	RNA recognition motif//RNA binding motif//Dcp1-like decapping family//RWD domain//RNA recognition motif. (a.k.a. RRM, RBD, or RNP domain)	GO:0043085//GO:0000290	positive regulation of catalytic activity//deadenylation-dependent decapping of nuclear-transcribed mRNA	GO:0016740//GO:0005515//GO:0003676//GO:0003723//GO:0008047	transferase activity//protein binding//nucleic acid binding//RNA binding//enzyme activator activity	--	--	--	--
Cluster-31803.26308	692.223	5311.28	-2.9398	2.25e-09	636	633902828	KDD71925.1	150	4.9e-08	hypothetical protein H632_c4157p0, partial [Helicosporidium sp. ATCC 50920]	--	--	--	--	--	--	--	--	--	--	--	--	--	PF01607	Chitin binding Peritrophin-A domain	GO:0006030	chitin metabolic process	GO:0008061	chitin binding	GO:0005576	extracellular region	--	--
Cluster-31803.66143	0	154.134	#NAME?	2.25e-09	2885	552821366	XP_005845829.1	1064	2.3e-113	hypothetical protein CHLNCDRAFT_136293 [Chlorella variabilis]>gi|307105478|gb|EFN53727.1| hypothetical protein CHLNCDRAFT_136293 [Chlorella variabilis]			210	3.81e-103		--	--	--	--	--	--	--	--	--	--	GO:0008209//GO:0008207//GO:0055114//GO:0006694//GO:0008210	androgen metabolic process//C21-steroid hormone metabolic process//oxidation-reduction process//steroid biosynthetic process//estrogen metabolic process	GO:0003854//GO:0000166	3-beta-hydroxy-delta5-steroid dehydrogenase activity//nucleotide binding	--	--	--	--
Cluster-31803.93267	107.491	1155.23	-3.4259	2.31e-09	3126	552816439	XP_005844683.1	453	1.8e-42	hypothetical protein CHLNCDRAFT_138589 [Chlorella variabilis]>gi|307104327|gb|EFN52581.1| hypothetical protein CHLNCDRAFT_138589 [Chlorella variabilis]	--	--	--	--	--	--	--	--	--	--	--	--	--	PF01061//PF01620	ABC-2 type transporter//Ribonuclease (pollen allergen)	GO:0016068	type I hypersensitivity	--	--	GO:0016020	membrane	--	--
Cluster-31803.69261	712.857	42.4194	4.0708	2.36e-09	2182	552839855	XP_005849900.1	1537	2.5e-168	hypothetical protein CHLNCDRAFT_143159 [Chlorella variabilis]>gi|307109560|gb|EFN57798.1| hypothetical protein CHLNCDRAFT_143159 [Chlorella variabilis]			420	0		--	--	--	--	--	--	--	--	PF07271//PF07231//PF03301	Cytadhesin P30/P32//Hs1pro-1 N-terminus//Tryptophan 2,3-dioxygenase	GO:0009405//GO:0006952//GO:0007157//GO:0006568//GO:0019441	pathogenesis//defense response//heterophilic cell-cell adhesion via plasma membrane cell adhesion molecules//tryptophan metabolic process//tryptophan catabolic process to kynurenine	GO:0020037//GO:0004833	heme binding//tryptophan 2,3-dioxygenase activity	GO:0016021	integral component of membrane	--	--
Cluster-31803.46365	2589.47	165.249	3.9699	2.42e-09	1293	552830447	XP_005847906.1	1827	3.5e-202	hypothetical protein CHLNCDRAFT_56139 [Chlorella variabilis]>gi|307107562|gb|EFN55804.1| hypothetical protein CHLNCDRAFT_56139 [Chlorella variabilis]			479	0		K01539	ATP1A	sodium/potassium-transporting ATPase subunit alpha	http://www.genome.jp/dbget-bin/www_bget?ko:K01539	P13637	664	3.5e-68	Sodium/potassium-transporting ATPase subunit alpha-3 OS=Homo sapiens GN=ATP1A3 PE=1 SV=3	--	--	GO:0006812//GO:0006754	cation transport//ATP biosynthetic process	GO:0005524//GO:0046872//GO:0015662	ATP binding//metal ion binding//ATPase activity, coupled to transmembrane movement of ions, phosphorylative mechanism	GO:0016021	integral component of membrane	KOG0203	Na+/K+ ATPase, alpha subunit
Cluster-31803.103336	109.795	1202.04	-3.4526	2.57e-09	2723	--	--	--	--	--	--	--	--	--	--	--	--	--	--	--	--	--	--	--	--	--	--	--	--	--	--	--	--
Cluster-31803.15031	1069.84	7981.69	-2.8993	2.6e-09	366	552826130	XP_005846961.1	523	1.6e-51	expressed protein [Chlorella variabilis]>gi|307106614|gb|EFN54859.1| expressed protein [Chlorella variabilis]			102	4.84e-44		--	--	--	--	--	--	--	--	PF10462	Peptidase M66	--	--	GO:0004222	metalloendopeptidase activity	--	--	--	--
Cluster-31803.49921	4904.15	34441.8	-2.8121	2.61e-09	2922	552838007	XP_005849486.1	1854	5.8e-205	hypothetical protein CHLNCDRAFT_142788 [Chlorella variabilis]>gi|307109146|gb|EFN57384.1| hypothetical protein CHLNCDRAFT_142788 [Chlorella variabilis]			339	7.52e-175		--	--	--	--	Q9X0Z6	608	2.5e-61	[FeFe] hydrogenase maturase subunit HydE OS=Thermotoga maritima (strain ATCC 43589 / MSB8 / DSM 3109 / JCM 10099) GN=TM_1269 PE=1 SV=1	PF08281//PF02627//PF04055	Sigma-70, region 4//Carboxymuconolactone decarboxylase family//Radical SAM superfamily	GO:0006355//GO:0008152//GO:0055114//GO:0006352	regulation of transcription, DNA-templated//metabolic process//oxidation-reduction process//DNA-templated transcription, initiation	GO:0003677//GO:0051536//GO:0003700//GO:0016987//GO:0005525//GO:0051920//GO:0003824	DNA binding//iron-sulfur cluster binding//transcription factor activity, sequence-specific DNA binding//sigma factor activity//GTP binding//peroxiredoxin activity//catalytic activity	GO:0005667	transcription factor complex	--	--
Cluster-31803.102252	100.415	1098.28	-3.4512	2.63e-09	535	552818842	XP_005845286.1	153	1.8e-08	hypothetical protein CHLNCDRAFT_136997 [Chlorella variabilis]>gi|307104933|gb|EFN53184.1| hypothetical protein CHLNCDRAFT_136997 [Chlorella variabilis]	--	--	--	--	--	--	--	--	--	Q4QR71	127	2.7e-06	Probable serine carboxypeptidase CPVL OS=Rattus norvegicus GN=CPVL PE=2 SV=1	PF00450	Serine carboxypeptidase	GO:0006508	proteolysis	GO:0004185	serine-type carboxypeptidase activity	--	--	KOG1282	Serine carboxypeptidases (lysosomal cathepsin A)
Cluster-31803.54933	1756.83	14683.9	-3.0632	2.63e-09	3156	760443565	XP_011398851.1	1915	5.3e-212	ABC transporter G family member 31 [Auxenochlorella protothecoides]>gi|675353515|gb|KFM25955.1| ABC transporter G family member 31 [Auxenochlorella protothecoides]			115	2.7e-50		--	--	--	--	A2WSH0	1233	9e-134	ABC transporter G family member 36 OS=Oryza sativa subsp. indica GN=ABCG36 PE=2 SV=1	PF13304//PF02979//PF03176//PF03193//PF01061//PF00005	AAA domain, putative AbiEii toxin, Type IV TA system//Nitrile hydratase, alpha chain//MMPL family//Protein of unknown function, DUF258//ABC-2 type transporter//ABC transporter	GO:0006807	nitrogen compound metabolic process	GO:0046914//GO:0005524//GO:0003824//GO:0016887//GO:0005525//GO:0003924	transition metal ion binding//ATP binding//catalytic activity//ATPase activity//GTP binding//GTPase activity	GO:0016020	membrane	--	--
Cluster-31803.14876	154.942	2493.81	-4.0085	2.88e-09	1092	552841747	XP_005850391.1	281	5.4e-23	hypothetical protein CHLNCDRAFT_142269 [Chlorella variabilis]>gi|307110052|gb|EFN58289.1| hypothetical protein CHLNCDRAFT_142269 [Chlorella variabilis]	--	--	--	--	--	K16292	CEP, CYSEP	KDEL-tailed cysteine endopeptidase	http://www.genome.jp/dbget-bin/www_bget?ko:K16292	Q3T0I2	181	3e-12	Pro-cathepsin H OS=Bos taurus GN=CTSH PE=2 SV=1	PF00112//PF03051	Papain family cysteine protease//Peptidase C1-like family	GO:0006508	proteolysis	GO:0004197//GO:0008234	cysteine-type endopeptidase activity//cysteine-type peptidase activity	--	--	KOG1543	Cysteine proteinase Cathepsin L
Cluster-31803.34150	381.646	3089.65	-3.0171	2.96e-09	2493	552831285	XP_005848095.1	231	7.8e-17	expressed protein [Chlorella variabilis]>gi|307107751|gb|EFN55993.1| expressed protein [Chlorella variabilis]	--	--	--	--	--	--	--	--	--	--	--	--	--	--	--	--	--	--	--	--	--	--	--
Cluster-31803.20268	124.005	1268.83	-3.355	2.98e-09	4459	552845318	XP_005851319.1	567	1.5e-55	hypothetical protein CHLNCDRAFT_50087 [Chlorella variabilis]>gi|307110982|gb|EFN59217.1| hypothetical protein CHLNCDRAFT_50087 [Chlorella variabilis]	--	--	--	--	--	--	--	--	--	Q6JHU8	133	4.5e-06	Prolyl 3-hydroxylase 1 OS=Gallus gallus GN=LEPRE1 PE=1 SV=1	PF01442//PF13640//PF00481	Apolipoprotein A1/A4/E domain//2OG-Fe(II) oxygenase superfamily//Protein phosphatase 2C	GO:0055114//GO:0006869//GO:0042157	oxidation-reduction process//lipid transport//lipoprotein metabolic process	GO:0016491//GO:0003824//GO:0008289	oxidoreductase activity//catalytic activity//lipid binding	GO:0005576	extracellular region	--	--
Cluster-31803.103340	29.8357	530.569	-4.1524	3.03e-09	1892	552820579	XP_005845634.1	152	8.5e-08	hypothetical protein CHLNCDRAFT_136637 [Chlorella variabilis]>gi|307105282|gb|EFN53532.1| hypothetical protein CHLNCDRAFT_136637 [Chlorella variabilis]	--	--	--	--	--	--	--	--	--	--	--	--	--	--	--	--	--	--	--	--	--	--	--
Cluster-31803.101815	185.011	0	Inf	3.09e-09	6388	552848352	XP_005852080.1	1661	3e-182	hypothetical protein CHLNCDRAFT_133097 [Chlorella variabilis]>gi|307111744|gb|EFN59978.1| hypothetical protein CHLNCDRAFT_133097 [Chlorella variabilis]			119	3.28e-52		--	--	--	--	Q8BTK5	223	2.4e-16	SET and MYND domain-containing protein 4 OS=Mus musculus GN=Smyd4 PE=2 SV=2	PF03975//PF00856//PF13176//PF00515//PF13414	CheD chemotactic sensory transduction//SET domain//Tetratricopeptide repeat//Tetratricopeptide repeat//TPR repeat	GO:0006807//GO:0006935	nitrogen compound metabolic process//chemotaxis	GO:0050568//GO:0005515	protein-glutamine glutaminase activity//protein binding	--	--	KOG0714	Molecular chaperone (DnaJ superfamily)
Cluster-31803.103319	1936.77	13922.1	-2.8456	3.38e-09	1013	552821047	XP_005845742.1	344	2.5e-30	hypothetical protein CHLNCDRAFT_58434 [Chlorella variabilis]>gi|307105391|gb|EFN53640.1| hypothetical protein CHLNCDRAFT_58434 [Chlorella variabilis]	--	--	--	--	--	--	--	--	--	P21849	137	3.5e-07	Major surface-labeled trophozoite antigen 417 OS=Giardia intestinalis GN=TSA 417 PE=2 SV=1	PF03014	Structural protein 2	--	--	GO:0005198	structural molecule activity	--	--	--	--
Cluster-31803.81452	913.225	6775.08	-2.8912	3.39e-09	1155	552844233	XP_005851045.1	318	2.9e-27	hypothetical protein CHLNCDRAFT_50489 [Chlorella variabilis]>gi|307110707|gb|EFN58943.1| hypothetical protein CHLNCDRAFT_50489 [Chlorella variabilis]	--	--	--	--	--	--	--	--	--	--	--	--	--	PF01758	Sodium Bile acid symporter family	--	--	--	--	GO:0016020	membrane	--	--
Cluster-31803.54949	0	148.753	#NAME?	3.66e-09	3273	760443565	XP_011398851.1	1611	9.8e-177	ABC transporter G family member 31 [Auxenochlorella protothecoides]>gi|675353515|gb|KFM25955.1| ABC transporter G family member 31 [Auxenochlorella protothecoides]			115	2.8e-50		--	--	--	--	Q7PC80	1088	6e-117	ABC transporter G family member 34 OS=Oryza sativa subsp. japonica GN=ABCG34 PE=3 SV=1	PF07962//PF13304//PF03193//PF03176//PF01061//PF00005	Replication Fork Protection Component Swi3//AAA domain, putative AbiEii toxin, Type IV TA system//Protein of unknown function, DUF258//MMPL family//ABC-2 type transporter//ABC transporter	GO:0048478//GO:0007049//GO:0006974	replication fork protection//cell cycle//cellular response to DNA damage stimulus	GO:0003924//GO:0005524//GO:0005525//GO:0016887	GTPase activity//ATP binding//GTP binding//ATPase activity	GO:0016020//GO:0005634	membrane//nucleus	--	--
Cluster-31803.24226	183.444	0	Inf	3.67e-09	1755	633906776	KDD73357.1	293	3.5e-24	hypothetical protein H632_c2259p0, partial [Helicosporidium sp. ATCC 50920]	--	--	--	--	--	--	--	--	--	--	--	--	--	PF00356	Bacterial regulatory proteins, lacI family	GO:0006355	regulation of transcription, DNA-templated	GO:0003700	transcription factor activity, sequence-specific DNA binding	GO:0005667	transcription factor complex	--	--
Cluster-31803.104391	183.456	0	Inf	3.68e-09	5466	633906849	KDD73390.1	320	8.2e-27	hypothetical protein H632_c2229p1 [Helicosporidium sp. ATCC 50920]	--	--	--	--	--	--	--	--	--	--	--	--	--	PF07267//PF02362	Nucleopolyhedrovirus capsid protein P87//B3 DNA binding domain	--	--	GO:0003677	DNA binding	GO:0019028	viral capsid	--	--
Cluster-31803.50799	363.144	2935.31	-3.0149	3.79e-09	2559	552832949	XP_005848446.1	450	3.2e-42	hypothetical protein CHLNCDRAFT_144815 [Chlorella variabilis]>gi|307108103|gb|EFN56344.1| hypothetical protein CHLNCDRAFT_144815 [Chlorella variabilis]	--	--	--	--	--	--	--	--	--	--	--	--	--	--	--	--	--	--	--	--	--	--	--
Cluster-31803.21845	264.794	2234.2	-3.0768	3.84e-09	3359	552813964	XP_005844077.1	2236	3.4e-249	hypothetical protein CHLNCDRAFT_139472 [Chlorella variabilis]>gi|307103717|gb|EFN51975.1| hypothetical protein CHLNCDRAFT_139472 [Chlorella variabilis]	--	--	--	--	--	--	--	--	--	Q4LDE5	176	3.5e-11	Sushi, von Willebrand factor type A, EGF and pentraxin domain-containing protein 1 OS=Homo sapiens GN=SVEP1 PE=1 SV=3	PF07562//PF00020	Nine Cysteines Domain of family 3 GPCR//TNFR/NGFR cysteine-rich region	GO:0007186	G-protein coupled receptor signaling pathway	GO:0005515//GO:0004930	protein binding//G-protein coupled receptor activity	--	--	KOG1217	Fibrillins and related proteins containing Ca2+-binding EGF-like domains
Cluster-31803.78292	91.7101	1003.41	-3.4517	3.84e-09	222	552820992	XP_005845727.1	196	7.9e-14	hypothetical protein CHLNCDRAFT_58424 [Chlorella variabilis]>gi|307105376|gb|EFN53625.1| hypothetical protein CHLNCDRAFT_58424 [Chlorella variabilis]	--	--	--	--	--	--	--	--	--	--	--	--	--	--	--	--	--	--	--	--	--	--	--
Cluster-31803.81459	158.363	1516	-3.259	3.84e-09	3790	552844233	XP_005851045.1	548	2.1e-53	hypothetical protein CHLNCDRAFT_50489 [Chlorella variabilis]>gi|307110707|gb|EFN58943.1| hypothetical protein CHLNCDRAFT_50489 [Chlorella variabilis]	--	--	--	--	--	--	--	--	--	--	--	--	--	PF03137//PF02049	Organic Anion Transporter Polypeptide (OATP) family//Flagellar hook-basal body complex protein FliE	GO:0006810//GO:0071973	transport//bacterial-type flagellum-dependent cell motility	GO:0005215//GO:0005198//GO:0003774	transporter activity//structural molecule activity//motor activity	GO:0009288//GO:0016020	bacterial-type flagellum//membrane	--	--
Cluster-31803.57947	667.299	43.4154	3.9421	3.86e-09	445	552844949	XP_005851219.1	273	1.9e-22	hypothetical protein CHLNCDRAFT_49957 [Chlorella variabilis]>gi|307110882|gb|EFN59117.1| hypothetical protein CHLNCDRAFT_49957 [Chlorella variabilis]	--	--	--	--	--	--	--	--	--	P74615	162	1.9e-10	Uncharacterized protein sll1483 OS=Synechocystis sp. (strain PCC 6803 / Kazusa) GN=sll1483 PE=3 SV=1	--	--	--	--	--	--	--	--	--	--
Cluster-31803.77573	182.602	0	Inf	3.9e-09	2168	552827581	XP_005847259.1	665	3.2e-67	expressed protein [Chlorella variabilis]>gi|307106913|gb|EFN55157.1| expressed protein [Chlorella variabilis]			72	1.48e-26		--	--	--	--	--	--	--	--	PF10483//PF03014//PF02628	Elongator subunit Iki1//Structural protein 2//Cytochrome oxidase assembly protein	GO:0055114//GO:0006784	oxidation-reduction process//heme a biosynthetic process	GO:0016627//GO:0005198	oxidoreductase activity, acting on the CH-CH group of donors//structural molecule activity	GO:0016021//GO:0033588	integral component of membrane//Elongator holoenzyme complex	--	--
Cluster-31803.28688	662.002	12.8078	5.6917	4.1e-09	1110	552834168	XP_005848667.1	1122	1.7e-120	hypothetical protein CHLNCDRAFT_144236 [Chlorella variabilis]>gi|307108325|gb|EFN56565.1| hypothetical protein CHLNCDRAFT_144236 [Chlorella variabilis]	--	--	--	--	--	K18477	RMT2	protein arginine N-methyltransferase 2	http://www.genome.jp/dbget-bin/www_bget?ko:K18477	Q10170	449	2.6e-43	Protein arginine N-methyltransferase 2 OS=Schizosaccharomyces pombe (strain 972 / ATCC 24843) GN=rmt2 PE=3 SV=2	PF08241	Methyltransferase domain	GO:0008152	metabolic process	GO:0008168	methyltransferase activity	--	--	KOG1709	Guanidinoacetate methyltransferase and related proteins
Cluster-31803.99505	8.40726	572.841	-6.0904	4.15e-09	2844	552817063	XP_005844839.1	486	2.4e-46	hypothetical protein CHLNCDRAFT_138305 [Chlorella variabilis]>gi|307104484|gb|EFN52737.1| hypothetical protein CHLNCDRAFT_138305 [Chlorella variabilis]	--	--	--	--	--	--	--	--	--	--	--	--	--	PF01562//PF07465//PF05887	Reprolysin family propeptide//Photosystem I protein M (PsaM)//Procyclic acidic repetitive protein (PARP)	GO:0015979//GO:0006508	photosynthesis//proteolysis	GO:0008270//GO:0004222	zinc ion binding//metalloendopeptidase activity	GO:0016020	membrane	--	--
Cluster-31803.59161	4081.71	28286.1	-2.7929	4.18e-09	464	552809140	XP_005842870.1	386	1.5e-35	hypothetical protein CHLNCDRAFT_55572 [Chlorella variabilis]>gi|307102485|gb|EFN50758.1| hypothetical protein CHLNCDRAFT_55572 [Chlorella variabilis]	--	--	--	--	--	--	--	--	--	--	--	--	--	PF00020//PF07562	TNFR/NGFR cysteine-rich region//Nine Cysteines Domain of family 3 GPCR	GO:0007186	G-protein coupled receptor signaling pathway	GO:0004930//GO:0005515	G-protein coupled receptor activity//protein binding	--	--	--	--
Cluster-31803.77053	181.634	0	Inf	4.35e-09	5447	552832335	XP_005848323.1	2203	3.7e-245	hypothetical protein CHLNCDRAFT_51884 [Chlorella variabilis]>gi|307107980|gb|EFN56221.1| hypothetical protein CHLNCDRAFT_51884 [Chlorella variabilis]			597	0		K01669	phrB	deoxyribodipyrimidine photo-lyase	http://www.genome.jp/dbget-bin/www_bget?ko:K01669	Q5IFN2	1297	5.9e-141	Cryptochrome DASH, chloroplastic/mitochondrial OS=Ostreococcus tauri GN=Ot01g06320 PE=3 SV=1	PF00579//PF12537	tRNA synthetases class I (W and Y)//The Golgi pH Regulator (GPHR) Family N-terminal	GO:0006418//GO:0006281	tRNA aminoacylation for protein translation//DNA repair	GO:0000166//GO:0004812//GO:0005524//GO:0003913	nucleotide binding//aminoacyl-tRNA ligase activity//ATP binding//DNA photolyase activity	GO:0016020	membrane	KOG0133	Deoxyribodipyrimidine photolyase/cryptochrome
Cluster-31803.46045	2154.78	14905.7	-2.7903	4.55e-09	5953	552848279	XP_005852065.1	1280	4.3e-138	hypothetical protein CHLNCDRAFT_18182 [Chlorella variabilis]>gi|307111729|gb|EFN59963.1| hypothetical protein CHLNCDRAFT_18182 [Chlorella variabilis]			539	0		K12251	aguB	N-carbamoylputrescine amidase	http://www.genome.jp/dbget-bin/www_bget?ko:K12251	Q9XGI9	932	1.3e-98	N-carbamoylputrescine amidase OS=Solanum lycopersicum GN=CPA PE=2 SV=1	PF03462//PF04371//PF16326//PF00704//PF00472//PF00795	PCRF domain//Porphyromonas-type peptidyl-arginine deiminase//ABC transporter C-terminal domain//Glycosyl hydrolases family 18//RF-1 domain//Carbon-nitrogen hydrolase	GO:0006449//GO:0006525//GO:0006415//GO:0006560//GO:0006596//GO:0006807//GO:0009446//GO:0005975	regulation of translational termination//arginine metabolic process//translational termination//proline metabolic process//polyamine biosynthetic process//nitrogen compound metabolic process//putrescine biosynthetic process//carbohydrate metabolic process	GO:0050126//GO:0004553//GO:0003677//GO:0004668//GO:0016810//GO:0016149//GO:0003747	N-carbamoylputrescine amidase activity//hydrolase activity, hydrolyzing O-glycosyl compounds//DNA binding//protein-arginine deiminase activity//hydrolase activity, acting on carbon-nitrogen (but not peptide) bonds//translation release factor activity, codon specific//translation release factor activity	GO:0018444//GO:0005737//GO:0005840	translation release factor complex//cytoplasm//ribosome	--	--
Cluster-31803.65790	643.2	4758.24	-2.8871	4.56e-09	1344	--	--	--	--	--	--	--	--	--	--	--	--	--	--	--	--	--	--	--	--	--	--	--	--	--	--	--	--
Cluster-31803.55956	181.283	0	Inf	4.57e-09	1402	--	--	--	--	--	--	--	--	--	--	--	--	--	--	--	--	--	--	PF00060	Ligand-gated ion channel	GO:0007268//GO:0006811//GO:0007165	synaptic transmission//ion transport//signal transduction	GO:0004970	ionotropic glutamate receptor activity	GO:0016020	membrane	--	--
Cluster-31803.43420	1963.51	13891.5	-2.8227	5e-09	2559	761974935	KIZ04961.1	1030	1.8e-109	hypothetical protein MNEG_2999 [Monoraphidium neglectum]	--	--	--	--	--	--	--	--	--	P94679	269	4.4e-22	Toluene-4-sulfonate monooxygenase system iron-sulfur subunit TsaM1 OS=Comamonas testosteroni GN=tsaM1 PE=1 SV=1	PF00355//PF13806//PF00214	Rieske [2Fe-2S] domain//Rieske-like [2Fe-2S] domain//Calcitonin / CGRP / IAPP family	GO:0055114//GO:0007165//GO:0006807//GO:0042128	oxidation-reduction process//signal transduction//nitrogen compound metabolic process//nitrate assimilation	GO:0005179//GO:0008942//GO:0016491//GO:0051537	hormone activity//nitrite reductase [NAD(P)H] activity//oxidoreductase activity//2 iron, 2 sulfur cluster binding	GO:0005576	extracellular region	--	--
Cluster-31803.103634	0	144.782	#NAME?	5.16e-09	2578	552847971	XP_005851991.1	536	3.5e-52	hypothetical protein CHLNCDRAFT_132900 [Chlorella variabilis]>gi|307111655|gb|EFN59889.1| hypothetical protein CHLNCDRAFT_132900 [Chlorella variabilis]	--	--	--	--	--	K01366	CTSH	cathepsin H	http://www.genome.jp/dbget-bin/www_bget?ko:K01366	Q24940	266	9.9e-22	Cathepsin L-like proteinase OS=Fasciola hepatica GN=Cat-1 PE=1 SV=1	PF00112//PF03051	Papain family cysteine protease//Peptidase C1-like family	GO:0006508	proteolysis	GO:0004197//GO:0008234	cysteine-type endopeptidase activity//cysteine-type peptidase activity	--	--	--	--
Cluster-31803.27968	2289.7	262.075	3.1271	5.2e-09	1351	302831582	XP_002947356.1	730	5.8e-75	hypothetical protein VOLCADRAFT_103449 [Volvox carteri f. nagariensis]>gi|300267220|gb|EFJ51404.1| hypothetical protein VOLCADRAFT_103449 [Volvox carteri f. nagariensis]	--	--	--	--	--	--	--	--	--	--	--	--	--	PF00328	Histidine phosphatase superfamily (branch 2)	GO:0019497//GO:0006771	hexachlorocyclohexane metabolic process//riboflavin metabolic process	GO:0003993	acid phosphatase activity	--	--	--	--
Cluster-31803.55482	1616	11543.3	-2.8366	5.61e-09	301	552809140	XP_005842870.1	294	4.6e-25	hypothetical protein CHLNCDRAFT_55572 [Chlorella variabilis]>gi|307102485|gb|EFN50758.1| hypothetical protein CHLNCDRAFT_55572 [Chlorella variabilis]	--	--	--	--	--	--	--	--	--	Q9NQ36	143	2.1e-08	Signal peptide, CUB and EGF-like domain-containing protein 2 OS=Homo sapiens GN=SCUBE2 PE=2 SV=2	PF00020//PF07562	TNFR/NGFR cysteine-rich region//Nine Cysteines Domain of family 3 GPCR	GO:0007186	G-protein coupled receptor signaling pathway	GO:0004930//GO:0005515	G-protein coupled receptor activity//protein binding	--	--	KOG1217	Fibrillins and related proteins containing Ca2+-binding EGF-like domains
Cluster-31803.7523	1788.14	24.2625	6.2036	5.68e-09	960	552828860	XP_005847566.1	346	1.4e-30	hypothetical protein CHLNCDRAFT_133810 [Chlorella variabilis]>gi|307107221|gb|EFN55464.1| hypothetical protein CHLNCDRAFT_133810 [Chlorella variabilis]	--	--	--	--	--	--	--	--	--	Q9UUE1	144	5.1e-08	Pyruvate carboxylase OS=Schizosaccharomyces pombe (strain 972 / ATCC 24843) GN=pyr1 PE=3 SV=1	PF02666	Phosphatidylserine decarboxylase	GO:0006566//GO:0006563//GO:0044267//GO:0046486//GO:0008654//GO:0006544	threonine metabolic process//L-serine metabolic process//cellular protein metabolic process//glycerolipid metabolic process//phospholipid biosynthetic process//glycine metabolic process	GO:0004609//GO:0016874//GO:0043167	phosphatidylserine decarboxylase activity//ligase activity//ion binding	--	--	KOG0238	3-Methylcrotonyl-CoA carboxylase, biotin-containing subunit/Propionyl-CoA carboxylase, alpha chain/Acetyl-CoA carboxylase, biotin carboxylase subunit
Cluster-31803.57780	249.373	0	Inf	5.82e-09	1987	552825556	XP_005846843.1	1426	1.7e-155	hypothetical protein CHLNCDRAFT_134632 [Chlorella variabilis]>gi|307106496|gb|EFN54741.1| hypothetical protein CHLNCDRAFT_134632 [Chlorella variabilis]	--	--	--	--	--	K08333	PIK3R4, VPS15	phosphoinositide-3-kinase, regulatory subunit 4	http://www.genome.jp/dbget-bin/www_bget?ko:K08333	Q54S77	316	1.2e-27	Probable serine/threonine-protein kinase vps15 OS=Dictyostelium discoideum GN=vps15 PE=3 SV=1	PF01213//PF00400	Adenylate cyclase associated (CAP) N terminal//WD domain, G-beta repeat	GO:0007010	cytoskeleton organization	GO:0005515//GO:0003779	protein binding//actin binding	--	--	KOG1240	Protein kinase containing WD40 repeats
Cluster-31803.70202	257.703	0	Inf	5.85e-09	5175	552822143	XP_005846036.1	1285	9.8e-139	hypothetical protein CHLNCDRAFT_58396 [Chlorella variabilis]>gi|307105686|gb|EFN53934.1| hypothetical protein CHLNCDRAFT_58396 [Chlorella variabilis]	--	--	--	--	--	--	--	--	--	Q924W5	227	6.6e-17	Structural maintenance of chromosomes protein 6 OS=Mus musculus GN=Smc6 PE=2 SV=1	PF13304//PF00005	AAA domain, putative AbiEii toxin, Type IV TA system//ABC transporter	--	--	GO:0005524//GO:0016887	ATP binding//ATPase activity	--	--	KOG0250	DNA repair protein RAD18 (SMC family protein)
Cluster-31803.86160	43.8591	633.781	-3.853	5.9e-09	1335	302843587	XP_002953335.1	149	1.3e-07	hypothetical protein VOLCADRAFT_105857 [Volvox carteri f. nagariensis]>gi|300261432|gb|EFJ45645.1| hypothetical protein VOLCADRAFT_105857 [Volvox carteri f. nagariensis]	--	--	--	--	--	--	--	--	--	--	--	--	--	PF07648//PF00050	Kazal-type serine protease inhibitor domain//Kazal-type serine protease inhibitor domain	--	--	GO:0005515	protein binding	--	--	--	--
Cluster-31803.15032	1438.35	10056.9	-2.8057	6.33e-09	1065	552826130	XP_005846961.1	604	1.9e-60	expressed protein [Chlorella variabilis]>gi|307106614|gb|EFN54859.1| expressed protein [Chlorella variabilis]			66	1.54e-23		--	--	--	--	--	--	--	--	PF02244	Carboxypeptidase activation peptide	GO:0006508	proteolysis	GO:0004180	carboxypeptidase activity	--	--	--	--
Cluster-31803.27149	269.432	2197.79	-3.0281	6.43e-09	1417	760439011	XP_011396574.1	194	8.6e-13	hypothetical protein F751_0912 [Auxenochlorella protothecoides]>gi|675351258|gb|KFM23698.1| hypothetical protein F751_0912 [Auxenochlorella protothecoides]	--	--	--	--	--	--	--	--	--	--	--	--	--	--	--	--	--	--	--	--	--	--	--
Cluster-31803.31213	177.99	0	Inf	6.43e-09	2614	552820721	XP_005845661.1	279	2.2e-22	hypothetical protein CHLNCDRAFT_17567, partial [Chlorella variabilis]>gi|307105309|gb|EFN53559.1| hypothetical protein CHLNCDRAFT_17567, partial [Chlorella variabilis]	--	--	--	--	--	--	--	--	--	Q9W5U2	173	6.1e-11	Probable chitinase 3 OS=Drosophila melanogaster GN=Cht3 PE=2 SV=2	PF00187//PF00704//PF05507//PF00751	Chitin recognition protein//Glycosyl hydrolases family 18//Microfibril-associated glycoprotein (MAGP)//DM DNA binding domain	GO:0006355//GO:0005975	regulation of transcription, DNA-templated//carbohydrate metabolic process	GO:0004553//GO:0043565//GO:0008061	hydrolase activity, hydrolyzing O-glycosyl compounds//sequence-specific DNA binding//chitin binding	GO:0001527	microfibril	KOG2806	Chitinase
Cluster-31803.57734	45.3043	631.297	-3.8006	6.43e-09	801	--	--	--	--	--	--	--	--	--	--	--	--	--	--	--	--	--	--	--	--	--	--	--	--	--	--	--	--
Cluster-31803.11665	32.3364	530.49	-4.0361	6.49e-09	279	--	--	--	--	--	--	--	--	--	--	--	--	--	--	--	--	--	--	--	--	--	--	--	--	--	--	--	--
Cluster-31803.94020	232.617	1964.47	-3.0781	6.89e-09	2257	552837659	XP_005849420.1	157	2.7e-08	hypothetical protein CHLNCDRAFT_143946 [Chlorella variabilis]>gi|307109079|gb|EFN57318.1| hypothetical protein CHLNCDRAFT_143946 [Chlorella variabilis]	--	--	--	--	--	--	--	--	--	--	--	--	--	PF09142	tRNA Pseudouridine synthase II, C terminal	GO:0001522//GO:0009451	pseudouridine synthesis//RNA modification	GO:0003723//GO:0009982	RNA binding//pseudouridine synthase activity	--	--	--	--
Cluster-31803.21553	0.7117	235.944	-8.373	6.89e-09	610	145408590	YP_001152214.1	142	4e-07	ORF124 [Pinus koraiensis]>gi|145048839|gb|ABP35456.1| ORF124 [Pinus koraiensis]			431	0		--	--	--	--	--	--	--	--	--	--	--	--	--	--	--	--	--	--
Cluster-31803.48990	2422.86	16441.7	-2.7626	6.97e-09	2539	760437855	XP_011395996.1	264	1.2e-20	putative E3 ubiquitin-protein ligase BAH1-like protein [Auxenochlorella protothecoides]>gi|675350686|gb|KFM23126.1| putative E3 ubiquitin-protein ligase BAH1-like protein [Auxenochlorella protothecoides]	--	--	--	--	--	K16275	BAH, NLA	E3 ubiquitin-protein ligase BAH	http://www.genome.jp/dbget-bin/www_bget?ko:K16275	Q7XZZ3	156	5.5e-09	Probable E3 ubiquitin-protein ligase BAH1-like 1 OS=Oryza sativa subsp. japonica GN=Os03g0650900 PE=2 SV=1	PF13639//PF16685//PF00097//PF11095//PF14634	Ring finger domain//zinc RING finger of MSL2//Zinc finger, C3HC4 type (RING finger)//Gem-associated protein 7 (Gemin7)//zinc-RING finger domain	--	--	GO:0008270//GO:0005515//GO:0061630//GO:0046872	zinc ion binding//protein binding//ubiquitin protein ligase activity//metal ion binding	GO:0032797	SMN complex	--	--
Cluster-31803.82952	295.615	7.04128	5.3917	7.04e-09	1681	552844614	XP_005851128.1	318	4.3e-27	hypothetical protein CHLNCDRAFT_137712 [Chlorella variabilis]>gi|307110791|gb|EFN59026.1| hypothetical protein CHLNCDRAFT_137712 [Chlorella variabilis]	--	--	--	--	--	K12846	SNRNP27	U4/U6.U5 tri-snRNP-associated protein 3	http://www.genome.jp/dbget-bin/www_bget?ko:K12846	Q6DDA4	136	7.6e-07	U4/U6.U5 small nuclear ribonucleoprotein 27 kDa protein OS=Xenopus tropicalis GN=snrnp27 PE=2 SV=1	PF01080	Presenilin	--	--	GO:0004190	aspartic-type endopeptidase activity	GO:0016021	integral component of membrane	KOG3263	Nucleic acid binding protein
Cluster-31803.75287	444.006	3337.97	-2.9103	7.16e-09	1753	760439013	XP_011396575.1	337	2.8e-29	hypothetical protein F751_0913 [Auxenochlorella protothecoides]>gi|675351259|gb|KFM23699.1| hypothetical protein F751_0913 [Auxenochlorella protothecoides]	--	--	--	--	--	--	--	--	--	--	--	--	--	PF03153//PF11744	Transcription factor IIA, alpha/beta subunit//Aluminium activated malate transporter	GO:0015743//GO:0006367	malate transport//transcription initiation from RNA polymerase II promoter	--	--	GO:0005672	transcription factor TFIIA complex	--	--
Cluster-31803.11234	74.898	864.788	-3.5293	7.16e-09	815	552838743	XP_005849643.1	169	3.9e-10	hypothetical protein CHLNCDRAFT_143169 [Chlorella variabilis]>gi|307109303|gb|EFN57541.1| hypothetical protein CHLNCDRAFT_143169 [Chlorella variabilis]	--	--	--	--	--	--	--	--	--	--	--	--	--	--	--	--	--	--	--	--	--	--	--
Cluster-31803.64609	133.245	1303.39	-3.2901	7.23e-09	3183	552825715	XP_005846882.1	513	2e-49	hypothetical protein CHLNCDRAFT_12290, partial [Chlorella variabilis]>gi|307106535|gb|EFN54780.1| hypothetical protein CHLNCDRAFT_12290, partial [Chlorella variabilis]	--	--	--	--	--	K08360	CYB561	cytochrome b-561	http://www.genome.jp/dbget-bin/www_bget?ko:K08360	Q6DDR3	244	4.3e-19	Cytochrome b reductase 1 OS=Xenopus laevis GN=cybrd1 PE=2 SV=2	PF03188//PF01292//PF00642//PF00033	Eukaryotic cytochrome b561//Prokaryotic cytochrome b561//Zinc finger C-x8-C-x5-C-x3-H type (and similar)//Cytochrome b/b6/petB	GO:0022904//GO:0006118	respiratory electron transport chain//obsolete electron transport	GO:0046872//GO:0009055	metal ion binding//electron carrier activity	GO:0016021//GO:0016020	integral component of membrane//membrane	KOG1619	Cytochrome b
Cluster-31803.96392	63.7238	782.845	-3.6188	7.24e-09	770	--	--	--	--	--	--	--	--	--	--	--	--	--	--	--	--	--	--	--	--	--	--	--	--	--	--	--	--
Cluster-31803.48978	176.552	0	Inf	7.28e-09	2356	552843802	XP_005850934.1	673	4.1e-68	hypothetical protein CHLNCDRAFT_140669 [Chlorella variabilis]>gi|307110596|gb|EFN58832.1| hypothetical protein CHLNCDRAFT_140669 [Chlorella variabilis]	--	--	--	--	--	--	--	--	--	--	--	--	--	PF12568//PF00583//PF13673	Acetyltransferase (GNAT) domain//Acetyltransferase (GNAT) family//Acetyltransferase (GNAT) domain	GO:0042967	acyl-carrier-protein biosynthetic process	GO:0008080	N-acetyltransferase activity	--	--	--	--
Cluster-31803.85154	550.485	37.67	3.8692	7.56e-09	5540	552813429	XP_005843947.1	1218	6.2e-131	hypothetical protein CHLNCDRAFT_27604 [Chlorella variabilis]>gi|307103586|gb|EFN51845.1| hypothetical protein CHLNCDRAFT_27604 [Chlorella variabilis]			255	7.11e-128		K00729	ALG5	dolichyl-phosphate beta-glucosyltransferase	http://www.genome.jp/dbget-bin/www_bget?ko:K00729	Q9FPJ8	732	2e-75	Polyadenylate-binding protein RBP45A OS=Arabidopsis thaliana GN=RBP45A PE=2 SV=1	PF00076//PF00573//PF15761//PF06058//PF08777//PF16367	RNA recognition motif. (a.k.a. RRM, RBD, or RNP domain)//Ribosomal protein L4/L1 family//Immortalisation up-regulated protein//Dcp1-like decapping family//RNA binding motif//RNA recognition motif	GO:0000290//GO:0006412//GO:0043085//GO:0042254	deadenylation-dependent decapping of nuclear-transcribed mRNA//translation//positive regulation of catalytic activity//ribosome biogenesis	GO:0016740//GO:0003735//GO:0008047//GO:0003676//GO:0003723	transferase activity//structural constituent of ribosome//enzyme activator activity//nucleic acid binding//RNA binding	GO:0005634//GO:0005840	nucleus//ribosome	--	--
Cluster-31803.88081	176.211	0	Inf	7.65e-09	1096	552813906	XP_005844063.1	757	3.5e-78	hypothetical protein CHLNCDRAFT_27272 [Chlorella variabilis]>gi|307103703|gb|EFN51961.1| hypothetical protein CHLNCDRAFT_27272 [Chlorella variabilis]			194	1.11e-94		--	--	--	--	Q1DCU1	432	2.4e-41	Dual-specificity RNA methyltransferase RlmN 1 OS=Myxococcus xanthus (strain DK 1622) GN=rlmN1 PE=3 SV=1	PF04055	Radical SAM superfamily	GO:0009451//GO:0006364//GO:0006396//GO:0001510	RNA modification//rRNA processing//RNA processing//RNA methylation	GO:0008173//GO:0051536//GO:0003824	RNA methyltransferase activity//iron-sulfur cluster binding//catalytic activity	GO:0005737	cytoplasm	--	--
Cluster-31803.90234	126.194	1241.31	-3.2982	7.65e-09	1696	552827694	XP_005847283.1	1035	3.1e-110	hypothetical protein CHLNCDRAFT_57961 [Chlorella variabilis]>gi|307106937|gb|EFN55181.1| hypothetical protein CHLNCDRAFT_57961 [Chlorella variabilis]	--	--	--	--	--	--	--	--	--	Q5JQD7	721	1.1e-74	Probable metal-nicotianamine transporter YSL12 OS=Oryza sativa subsp. japonica GN=YSL12 PE=2 SV=2	PF03169	OPT oligopeptide transporter protein	GO:0055085	transmembrane transport	--	--	--	--	--	--
Cluster-31803.59169	1254.78	8766.7	-2.8046	7.91e-09	608	552809186	XP_005842883.1	364	7.2e-33	hypothetical protein CHLNCDRAFT_142476 [Chlorella variabilis]>gi|307102498|gb|EFN50771.1| hypothetical protein CHLNCDRAFT_142476 [Chlorella variabilis]	--	--	--	--	--	--	--	--	--	--	--	--	--	PF07562//PF00020	Nine Cysteines Domain of family 3 GPCR//TNFR/NGFR cysteine-rich region	GO:0007186	G-protein coupled receptor signaling pathway	GO:0004930//GO:0005515	G-protein coupled receptor activity//protein binding	--	--	--	--
Cluster-31803.73945	40.9058	591.87	-3.8549	8.02e-09	332	552846181	XP_005851548.1	334	1.2e-29	hypothetical protein CHLNCDRAFT_29581 [Chlorella variabilis]>gi|307111211|gb|EFN59446.1| hypothetical protein CHLNCDRAFT_29581 [Chlorella variabilis]			120	4.3e-54		--	--	--	--	A4TN50	252	5.3e-21	Hydroxylamine reductase OS=Yersinia pestis (strain Pestoides F) GN=hcp PE=3 SV=1	PF03063	Prismane/CO dehydrogenase family	GO:0055114	oxidation-reduction process	GO:0016661//GO:0051536//GO:0016491	oxidoreductase activity, acting on other nitrogenous compounds as donors//iron-sulfur cluster binding//oxidoreductase activity	GO:0005737	cytoplasm	--	--
Cluster-31803.87358	31.3148	41678.7	-10.378	8.08e-09	2799	552846181	XP_005851548.1	907	3.6e-95	hypothetical protein CHLNCDRAFT_29581 [Chlorella variabilis]>gi|307111211|gb|EFN59446.1| hypothetical protein CHLNCDRAFT_29581 [Chlorella variabilis]			57	4.17e-18		K14328	UPF3, RENT3	regulator of nonsense transcripts 3	http://www.genome.jp/dbget-bin/www_bget?ko:K14328	Q2RQN9	277	5.7e-23	Hydroxylamine reductase OS=Rhodospirillum rubrum (strain ATCC 11170 / ATH 1.1.1 / DSM 467 / LMG 4362 / NCIB 8255 / S1) GN=hcp PE=3 SV=1	PF03063	Prismane/CO dehydrogenase family	GO:0055114	oxidation-reduction process	GO:0016491	oxidoreductase activity	--	--	--	--
Cluster-31803.43576	175.468	0	Inf	8.18e-09	5566	159480804	XP_001698472.1	1306	3.9e-141	predicted protein [Chlamydomonas reinhardtii]>gi|158282212|gb|EDP07965.1| predicted protein, partial [Chlamydomonas reinhardtii]	--	--	--	--	--	K18932	ZDHHC	palmitoyltransferase	http://www.genome.jp/dbget-bin/www_bget?ko:K18932	Q3EC11	884	4.6e-93	Probable protein S-acyltransferase 23 OS=Arabidopsis thaliana GN=PAT23 PE=2 SV=2	PF01080//PF01529//PF13606//PF02870//PF00023	Presenilin//DHHC palmitoyltransferase//Ankyrin repeat//6-O-methylguanine DNA methyltransferase, ribonuclease-like domain//Ankyrin repeat	GO:0006281	DNA repair	GO:0008270//GO:0003908//GO:0004190//GO:0005515	zinc ion binding//methylated-DNA-[protein]-cysteine S-methyltransferase activity//aspartic-type endopeptidase activity//protein binding	GO:0016021	integral component of membrane	KOG0509	Ankyrin repeat and DHHC-type Zn-finger domain containing proteins
Cluster-31803.56792	0	179.489	#NAME?	8.21e-09	5706	552834980	XP_005848871.1	1156	9.8e-124	hypothetical protein CHLNCDRAFT_144246 [Chlorella variabilis]>gi|307108529|gb|EFN56769.1| hypothetical protein CHLNCDRAFT_144246 [Chlorella variabilis]	--	--	--	--	--	--	--	--	--	--	--	--	--	PF01080//PF00657	Presenilin//GDSL-like Lipase/Acylhydrolase	--	--	GO:0004190//GO:0016788	aspartic-type endopeptidase activity//hydrolase activity, acting on ester bonds	GO:0016021	integral component of membrane	--	--
Cluster-31803.57941	557.21	33.8247	4.0421	8.23e-09	593	552844954	XP_005851220.1	190	1e-12	hypothetical protein CHLNCDRAFT_137918 [Chlorella variabilis]>gi|307110883|gb|EFN59118.1| hypothetical protein CHLNCDRAFT_137918 [Chlorella variabilis]	--	--	--	--	--	--	--	--	--	--	--	--	--	--	--	--	--	--	--	--	--	--	--
Cluster-31803.29257	175.308	0	Inf	8.38e-09	2583	552822655	XP_005846172.1	1518	4.7e-166	hypothetical protein CHLNCDRAFT_58397 [Chlorella variabilis]>gi|307105822|gb|EFN54070.1| hypothetical protein CHLNCDRAFT_58397 [Chlorella variabilis]			42	8.38e-10		K14735	HEPH	hephaestin	http://www.genome.jp/dbget-bin/www_bget?ko:K14735	B3EWZ9	710	3.2e-73	Hephaestin-like protein OS=Acropora millepora PE=1 SV=1	PF02610//PF07732//PF00127//PF00394//PF07731//PF13806	L-arabinose isomerase//Multicopper oxidase//Copper binding proteins, plastocyanin/azurin family//Multicopper oxidase//Multicopper oxidase//Rieske-like [2Fe-2S] domain	GO:0008152//GO:0055114//GO:0006807//GO:0042128//GO:0006118	metabolic process//oxidation-reduction process//nitrogen compound metabolic process//nitrate assimilation//obsolete electron transport	GO:0046872//GO:0008942//GO:0009055//GO:0005507//GO:0016491//GO:0008733	metal ion binding//nitrite reductase [NAD(P)H] activity//electron carrier activity//copper ion binding//oxidoreductase activity//L-arabinose isomerase activity	--	--	--	--
Cluster-31803.29999	761.202	55.8164	3.7695	8.48e-09	1887	302833090	XP_002948109.1	1116	1.4e-119	hypothetical protein VOLCADRAFT_80016 [Volvox carteri f. nagariensis]>gi|300266911|gb|EFJ51097.1| hypothetical protein VOLCADRAFT_80016 [Volvox carteri f. nagariensis]			471	0		K01867	WARS, trpS	tryptophanyl-tRNA synthetase	http://www.genome.jp/dbget-bin/www_bget?ko:K01867	Q9SR15	919	1.4e-97	Tryptophan--tRNA ligase, cytoplasmic OS=Arabidopsis thaliana GN=At3g04600 PE=2 SV=1	PF02422//PF00579	Keratin//tRNA synthetases class I (W and Y)	GO:0006418//GO:0006436//GO:0006568	tRNA aminoacylation for protein translation//tryptophanyl-tRNA aminoacylation//tryptophan metabolic process	GO:0005524//GO:0000166//GO:0005200//GO:0004830//GO:0004812	ATP binding//nucleotide binding//structural constituent of cytoskeleton//tryptophan-tRNA ligase activity//aminoacyl-tRNA ligase activity	GO:0005882//GO:0005737//GO:0005856	intermediate filament//cytoplasm//cytoskeleton	KOG2145	Cytoplasmic tryptophanyl-tRNA synthetase
Cluster-31803.27992	174.788	0	Inf	8.83e-09	1173	552818749	XP_005845258.1	402	5.4e-37	hypothetical protein CHLNCDRAFT_136931 [Chlorella variabilis]>gi|307104905|gb|EFN53156.1| hypothetical protein CHLNCDRAFT_136931 [Chlorella variabilis]	--	--	--	--	--	--	--	--	--	--	--	--	--	PF00560//PF13855	Leucine Rich Repeat//Leucine rich repeat	--	--	GO:0005515	protein binding	--	--	--	--
Cluster-31803.80028	2073.46	30663.3	-3.8864	8.96e-09	2689	552810930	XP_005843330.1	889	4.2e-93	hypothetical protein CHLNCDRAFT_141231 [Chlorella variabilis]>gi|307102963|gb|EFN51228.1| hypothetical protein CHLNCDRAFT_141231 [Chlorella variabilis]	--	--	--	--	--	K00472	E1.14.11.2	prolyl 4-hydroxylase	http://www.genome.jp/dbget-bin/www_bget?ko:K00472	Q8LAN3	444	2.4e-42	Probable prolyl 4-hydroxylase 4 OS=Arabidopsis thaliana GN=P4H4 PE=2 SV=1	PF03171//PF13640	2OG-Fe(II) oxygenase superfamily//2OG-Fe(II) oxygenase superfamily	GO:0055114	oxidation-reduction process	GO:0016491//GO:0005506//GO:0031418//GO:0016706	oxidoreductase activity//iron ion binding//L-ascorbic acid binding//oxidoreductase activity, acting on paired donors, with incorporation or reduction of molecular oxygen, 2-oxoglutarate as one donor, and incorporation of one atom each of oxygen into both donors	--	--	--	--
Cluster-31803.20814	43.8107	632.249	-3.8511	9.09e-09	296	552816998	XP_005844823.1	265	1e-21	hypothetical protein CHLNCDRAFT_138258 [Chlorella variabilis]>gi|307104468|gb|EFN52721.1| hypothetical protein CHLNCDRAFT_138258 [Chlorella variabilis]	--	--	--	--	--	--	--	--	--	--	--	--	--	--	--	--	--	--	--	--	--	--	--
Cluster-31803.103379	732.765	5331.34	-2.8631	9.37e-09	5650	761961927	KIY95081.1	520	5.4e-50	cellulose synthase (UDP-forming) [Monoraphidium neglectum]	--	--	--	--	--	--	--	--	--	P58931	343	2.5e-30	Cellulose synthase catalytic subunit [UDP-forming] OS=Pseudomonas fluorescens (strain SBW25) GN=bcsA PE=3 SV=2	PF00023//PF13506//PF13606//PF03552	Ankyrin repeat//Glycosyl transferase family 21//Ankyrin repeat//Cellulose synthase	GO:0030244//GO:0005985//GO:0005982//GO:0006011	cellulose biosynthetic process//sucrose metabolic process//starch metabolic process//UDP-glucose metabolic process	GO:0005515//GO:0016757//GO:0016760	protein binding//transferase activity, transferring glycosyl groups//cellulose synthase (UDP-forming) activity	GO:0016020	membrane	--	--
Cluster-31803.21365	116.019	1203.39	-3.3747	9.38e-09	6019	552828061	XP_005847382.1	1286	8.7e-139	hypothetical protein CHLNCDRAFT_35526 [Chlorella variabilis]>gi|307107036|gb|EFN55280.1| hypothetical protein CHLNCDRAFT_35526 [Chlorella variabilis]			317	2.65e-162		K08568	CTSZ	cathepsin X	http://www.genome.jp/dbget-bin/www_bget?ko:K08568	Q9UBR2	858	5.2e-90	Cathepsin Z OS=Homo sapiens GN=CTSZ PE=1 SV=1	PF06426//PF03051//PF16934//PF00112//PF12300	Serine acetyltransferase, N-terminal//Peptidase C1-like family//Two-component Enterococcus faecalis cytolysin (EFC)//Papain family cysteine protease//Protein of unknown function (DUF3628)	GO:0042967//GO:0006535//GO:0006534//GO:0050830//GO:0006508	acyl-carrier-protein biosynthetic process//cysteine biosynthetic process from serine//cysteine metabolic process//defense response to Gram-positive bacterium//proteolysis	GO:0008234//GO:0009001//GO:0016817//GO:0004197	cysteine-type peptidase activity//serine O-acetyltransferase activity//hydrolase activity, acting on acid anhydrides//cysteine-type endopeptidase activity	GO:0005737	cytoplasm	--	--
Cluster-31803.6852	208.262	1.17832	7.4655	9.63e-09	1228	552843110	XP_005850748.1	264	5.7e-21	hypothetical protein CHLNCDRAFT_140894 [Chlorella variabilis]>gi|307110410|gb|EFN58646.1| hypothetical protein CHLNCDRAFT_140894 [Chlorella variabilis]	--	--	--	--	--	--	--	--	--	P9WNF5	131	2.1e-06	Immunogenic protein MPT70 OS=Mycobacterium tuberculosis (strain ATCC 25618 / H37Rv) GN=mpt70 PE=1 SV=1	PF15836	SSTK-interacting protein, TSSK6-activating co-chaperone protein	--	--	GO:0051087	chaperone binding	--	--	--	--
Cluster-31803.10725	22.0627	439.953	-4.3177	9.97e-09	1833	552818821	XP_005845280.1	225	2.8e-16	hypothetical protein CHLNCDRAFT_136986 [Chlorella variabilis]>gi|307104927|gb|EFN53178.1| hypothetical protein CHLNCDRAFT_136986 [Chlorella variabilis]	--	--	--	--	--	--	--	--	--	--	--	--	--	PF02536//PF04934	mTERF//MED6 mediator sub complex component	GO:0006355//GO:0006357	regulation of transcription, DNA-templated//regulation of transcription from RNA polymerase II promoter	GO:0001104//GO:0003690	RNA polymerase II transcription cofactor activity//double-stranded DNA binding	GO:0005739//GO:0016592	mitochondrion//mediator complex	--	--
Cluster-31803.63859	1.4234	183.224	-7.0081	1.03e-08	1091	552818162	XP_005845127.1	537	1.1e-52	hypothetical protein CHLNCDRAFT_137523 [Chlorella variabilis]>gi|307104773|gb|EFN53025.1| hypothetical protein CHLNCDRAFT_137523 [Chlorella variabilis]			45	7.47e-12		--	--	--	--	P77526	296	1.4e-25	Disulfide-bond oxidoreductase YfcG OS=Escherichia coli (strain K12) GN=yfcG PE=1 SV=1	PF13417//PF13409//PF02798	Glutathione S-transferase, N-terminal domain//Glutathione S-transferase, N-terminal domain//Glutathione S-transferase, N-terminal domain	--	--	GO:0005515	protein binding	--	--	KOG0867	Glutathione S-transferase
Cluster-31803.15036	93.8863	994.651	-3.4052	1.05e-08	1826	553176584	XP_005852383.1	346	2.6e-30	two component regulator propeller domain-containing protein, partial [Nannochloropsis gaditana CCMP526]>gi|422299747|gb|EKU23502.1| two component regulator propeller domain-containing protein, partial [Nannochloropsis gaditana CCMP526]	--	--	--	--	--	--	--	--	--	--	--	--	--	PF00112	Papain family cysteine protease	GO:0006508	proteolysis	GO:0008234	cysteine-type peptidase activity	--	--	--	--
Cluster-31803.103906	59.8046	737.323	-3.624	1.23e-08	513	1351858	P49609.1	152	2.3e-08	RecName: Full=Aconitate hydratase, mitochondrial; Short=Aconitase; AltName: Full=Citrate hydro-lyase; Flags: Precursor [Gracilaria gracilis]>gi|600171|gb|AAA80494.1| aconitase [Gracilariopsis longissima]			116	1.15e-51		--	--	--	--	P16276	202	5.1e-15	Aconitate hydratase, mitochondrial OS=Sus scrofa GN=ACO2 PE=1 SV=1	PF00330	Aconitase family (aconitate hydratase)	GO:0008152	metabolic process	--	--	--	--	KOG0453	Aconitase/homoaconitase (aconitase superfamily)
Cluster-31803.22944	1203.46	8032.26	-2.7386	1.23e-08	675	552839247	XP_005849755.1	1084	2.6e-116	hypothetical protein CHLNCDRAFT_30311 [Chlorella variabilis]>gi|307109415|gb|EFN57653.1| hypothetical protein CHLNCDRAFT_30311 [Chlorella variabilis]			462	0		--	--	--	--	Q9S498	141	8e-08	2-iminoacetate synthase OS=Salmonella typhimurium (strain LT2 / SGSC1412 / ATCC 700720) GN=thiH PE=1 SV=3	--	--	GO:0051186	cofactor metabolic process	GO:0003824//GO:0051536	catalytic activity//iron-sulfur cluster binding	--	--	--	--
Cluster-31803.54614	831.658	5916.61	-2.8307	1.25e-08	797	552841959	XP_005850444.1	493	1e-47	hypothetical protein CHLNCDRAFT_57139 [Chlorella variabilis]>gi|307110105|gb|EFN58342.1| hypothetical protein CHLNCDRAFT_57139 [Chlorella variabilis]			108	5.13e-47		--	--	--	--	Q8RWE8	139	1.6e-07	GDP-L-galactose phosphorylase 1 OS=Arabidopsis thaliana GN=VTC2 PE=1 SV=1	--	--	--	--	--	--	--	--	--	--
Cluster-31803.59222	171.154	0	Inf	1.32e-08	4527	552840529	XP_005850070.1	1089	4.6e-116	ribulose-phosphate 3-epimerase mature form [Chlorella variabilis]>gi|307109731|gb|EFN57968.1| ribulose-phosphate 3-epimerase mature form [Chlorella variabilis]			496	0		K01783	rpe, RPE	ribulose-phosphate 3-epimerase	http://www.genome.jp/dbget-bin/www_bget?ko:K01783	Q9ZTP5	962	3.4e-102	Ribulose-phosphate 3-epimerase, chloroplastic OS=Oryza sativa subsp. japonica GN=RPE PE=1 SV=2	PF06140//PF04131//PF00834//PF01384	Interferon-induced 6-16 family//Putative N-acetylmannosamine-6-phosphate epimerase//Ribulose-phosphate 3 epimerase family//Phosphate transporter family	GO:0006040//GO:0006051//GO:0005975//GO:0006098//GO:0006817//GO:0015976	amino sugar metabolic process//N-acetylmannosamine metabolic process//carbohydrate metabolic process//pentose-phosphate shunt//phosphate ion transport//carbon utilization	GO:0005315//GO:0004750//GO:0047465//GO:0016857//GO:0046872	inorganic phosphate transmembrane transporter activity//ribulose-phosphate 3-epimerase activity//N-acylglucosamine-6-phosphate 2-epimerase activity//racemase and epimerase activity, acting on carbohydrates and derivatives//metal ion binding	GO:0016021//GO:0016020	integral component of membrane//membrane	KOG3111	D-ribulose-5-phosphate 3-epimerase
Cluster-31803.29279	888.335	6220.26	-2.8078	1.34e-08	2204	552849175	XP_005852287.1	240	6.2e-18	hypothetical protein CHLNCDRAFT_56636 [Chlorella variabilis]>gi|307111951|gb|EFN60185.1| hypothetical protein CHLNCDRAFT_56636 [Chlorella variabilis]	--	--	--	--	--	--	--	--	--	Q55GG4	143	1.5e-07	Probable serine/threonine-protein kinase DDB_G0267686 OS=Dictyostelium discoideum GN=DDB_G0267686 PE=3 SV=1	PF07714//PF00015//PF00069	Protein tyrosine kinase//Methyl-accepting chemotaxis protein (MCP) signalling domain//Protein kinase domain	GO:0006468//GO:0007165	protein phosphorylation//signal transduction	GO:0004871//GO:0004672//GO:0016772//GO:0005524	signal transducer activity//protein kinase activity//transferase activity, transferring phosphorus-containing groups//ATP binding	GO:0016020	membrane	--	--
Cluster-31803.9600	0	139.887	#NAME?	1.34e-08	4574	552840823	XP_005850150.1	1314	3.7e-142	hypothetical protein CHLNCDRAFT_142285 [Chlorella variabilis]>gi|307109811|gb|EFN58048.1| hypothetical protein CHLNCDRAFT_142285 [Chlorella variabilis]			101	2.38e-42		--	--	--	--	--	--	--	--	PF00685	Sulfotransferase domain	--	--	GO:0008146	sulfotransferase activity	--	--	--	--
Cluster-31803.50839	1007.29	6835.82	-2.7626	1.38e-08	873	--	--	--	--	--	--	--	--	--	--	--	--	--	--	--	--	--	--	PF05887	Procyclic acidic repetitive protein (PARP)	--	--	--	--	GO:0016020	membrane	--	--
Cluster-31803.57703	3193.46	21079.9	-2.7227	1.43e-08	6387	552825966	XP_005846924.1	2161	3.2e-240	hypothetical protein CHLNCDRAFT_134832 [Chlorella variabilis]>gi|307106577|gb|EFN54822.1| hypothetical protein CHLNCDRAFT_134832 [Chlorella variabilis]			626	0		K00640	cysE	serine O-acetyltransferase	http://www.genome.jp/dbget-bin/www_bget?ko:K00640	Q8S895	695	4.4e-71	Serine acetyltransferase 2 OS=Arabidopsis thaliana GN=SAT2 PE=1 SV=2	PF04433//PF06426//PF13506//PF00569	SWIRM domain//Serine acetyltransferase, N-terminal//Glycosyl transferase family 21//Zinc finger, ZZ type	GO:0006535//GO:0042967//GO:0006534	cysteine biosynthetic process from serine//acyl-carrier-protein biosynthetic process//cysteine metabolic process	GO:0005515//GO:0008270//GO:0016757//GO:0009001//GO:0005488	protein binding//zinc ion binding//transferase activity, transferring glycosyl groups//serine O-acetyltransferase activity//binding	GO:0005737	cytoplasm	--	--
Cluster-31803.10716	54.9704	696.178	-3.6627	1.43e-08	2097	552843946	XP_005850969.1	1446	8.5e-158	hypothetical protein CHLNCDRAFT_140750 [Chlorella variabilis]>gi|307110631|gb|EFN58867.1| hypothetical protein CHLNCDRAFT_140750 [Chlorella variabilis]	--	--	--	--	--	--	--	--	--	Q2MHE4	246	1.7e-19	Serine/threonine-protein kinase HT1 OS=Arabidopsis thaliana GN=HT1 PE=1 SV=1	PF00069//PF04995//PF07714	Protein kinase domain//Heme exporter protein D (CcmD)//Protein tyrosine kinase	GO:0015886//GO:0017004//GO:0006468	heme transport//cytochrome complex assembly//protein phosphorylation	GO:0005524//GO:0004672	ATP binding//protein kinase activity	GO:0016021	integral component of membrane	--	--
Cluster-31803.44825	719.299	50.0785	3.8443	1.46e-08	3175	552847285	XP_005851827.1	459	3.6e-43	hypothetical protein CHLNCDRAFT_133304 [Chlorella variabilis]>gi|307111491|gb|EFN59725.1| hypothetical protein CHLNCDRAFT_133304 [Chlorella variabilis]	--	--	--	--	--	--	--	--	--	Q2MHE4	232	1.1e-17	Serine/threonine-protein kinase HT1 OS=Arabidopsis thaliana GN=HT1 PE=1 SV=1	PF07714//PF00069	Protein tyrosine kinase//Protein kinase domain	GO:0006468	protein phosphorylation	GO:0005524//GO:0004672	ATP binding//protein kinase activity	--	--	--	--
Cluster-31803.69949	2012.04	266.912	2.9142	1.48e-08	6016	552809454	XP_005842941.1	1227	6e-132	expressed protein [Chlorella variabilis]>gi|307102568|gb|EFN50839.1| expressed protein [Chlorella variabilis]			318	7.35e-163		--	--	--	--	--	--	--	--	PF00098//PF16588	Zinc knuckle//C2H2 zinc-finger	--	--	GO:0008270//GO:0003676//GO:0005488	zinc ion binding//nucleic acid binding//binding	--	--	--	--
Cluster-31803.76995	3698.61	495.127	2.9011	1.49e-08	2514	552816849	XP_005844791.1	579	3.5e-57	hypothetical protein CHLNCDRAFT_138674 [Chlorella variabilis]>gi|307104435|gb|EFN52689.1| hypothetical protein CHLNCDRAFT_138674 [Chlorella variabilis]	--	--	--	--	--	--	--	--	--	--	--	--	--	PF00730	HhH-GPD superfamily base excision DNA repair protein	GO:0006284	base-excision repair	--	--	--	--	--	--
Cluster-31803.89185	12.4548	396.756	-4.9935	1.53e-08	3276	552816902	XP_005844804.1	1520	3.5e-166	hypothetical protein CHLNCDRAFT_138705 [Chlorella variabilis]>gi|307104448|gb|EFN52702.1| hypothetical protein CHLNCDRAFT_138705 [Chlorella variabilis]	--	--	--	--	--	K11886	ECM29	proteasome component ECM29	http://www.genome.jp/dbget-bin/www_bget?ko:K11886	Q6PDI5	423	7.8e-40	Proteasome-associated protein ECM29 homolog OS=Mus musculus GN=Ecm29 PE=1 SV=3	PF01429//PF04706//PF02985	Methyl-CpG binding domain//Dickkopf N-terminal cysteine-rich region//HEAT repeat	GO:0030178//GO:0007275	negative regulation of Wnt signaling pathway//multicellular organismal development	GO:0005515//GO:0003677	protein binding//DNA binding	GO:0005576//GO:0005634	extracellular region//nucleus	KOG0915	Uncharacterized conserved protein
Cluster-31803.7431	492.075	26.8798	4.1943	1.59e-08	4825	552848362	XP_005852083.1	2040	2.6e-226	hypothetical protein CHLNCDRAFT_133105 [Chlorella variabilis]>gi|307111747|gb|EFN59981.1| hypothetical protein CHLNCDRAFT_133105 [Chlorella variabilis]			776	0		--	--	--	--	Q6STH5	1545	9.1e-170	Fe-S cluster assembly factor HCF101, chloroplastic OS=Arabidopsis thaliana GN=HCF101 PE=1 SV=1	PF06112	Gammaherpesvirus capsid protein	--	--	GO:0005524	ATP binding	GO:0019028	viral capsid	KOG3022	Predicted ATPase, nucleotide-binding
Cluster-31803.96218	4.69383	236.269	-5.6535	1.63e-08	453	--	--	--	--	--	--	--	--	--	--	--	--	--	--	--	--	--	--	--	--	--	--	--	--	--	--	--	--
Cluster-31803.103221	112.11	1069.25	-3.2536	1.68e-08	1076	--	--	--	--	--	--	--	--	--	--	--	--	--	--	--	--	--	--	--	--	--	--	--	--	--	--	--	--
Cluster-31803.99685	86.6313	902.937	-3.3817	1.72e-08	214	--	--	--	--	--	--	--	--	--	--	--	--	--	--	--	--	--	--	--	--	--	--	--	--	--	--	--	--
Cluster-31803.104001	0	325.793	#NAME?	1.76e-08	4835	552812012	XP_005843614.1	541	1.7e-52	hypothetical protein CHLNCDRAFT_59225 [Chlorella variabilis]>gi|307103250|gb|EFN51512.1| hypothetical protein CHLNCDRAFT_59225 [Chlorella variabilis]			145	8.73e-67		K09015	sufD	Fe-S cluster assembly protein SufD	http://www.genome.jp/dbget-bin/www_bget?ko:K09015	Q9LQK7	363	1e-32	Protein ABCI7, chloroplastic OS=Arabidopsis thaliana GN=ABCI7 PE=1 SV=1	PF01458	Uncharacterized protein family (UPF0051)	GO:0016226	iron-sulfur cluster assembly	--	--	--	--	--	--
Cluster-31803.10397	0	138.748	#NAME?	1.8e-08	1021	695069731	XP_009381860.1	202	7.3e-14	PREDICTED: keratin-associated protein 5-1-like [Musa acuminata subsp. malaccensis]	--	--	--	--	--	--	--	--	--	--	--	--	--	PF08046	IlvGEDA operon leader peptide	GO:0009082	branched-chain amino acid biosynthetic process	--	--	--	--	--	--
Cluster-31803.96779	2613.96	21860.4	-3.064	1.83e-08	1140	552826130	XP_005846961.1	1323	8.5e-144	expressed protein [Chlorella variabilis]>gi|307106614|gb|EFN54859.1| expressed protein [Chlorella variabilis]			172	1.97e-82		--	--	--	--	--	--	--	--	--	--	--	--	--	--	--	--	--	--
Cluster-31803.14321	838.893	69.3129	3.5973	1.93e-08	2345	302828234	XP_002945684.1	972	8.7e-103	hypothetical protein VOLCADRAFT_102656 [Volvox carteri f. nagariensis]>gi|300268499|gb|EFJ52679.1| hypothetical protein VOLCADRAFT_102656 [Volvox carteri f. nagariensis]	--	--	--	--	--	K01409	KAE1, tsaD, QRI7	N6-L-threonylcarbamoyladenine synthase	http://www.genome.jp/dbget-bin/www_bget?ko:K01409	O22145	550	1e-54	Probable tRNA N6-adenosine threonylcarbamoyltransferase, mitochondrial OS=Arabidopsis thaliana GN=GCP1 PE=2 SV=2	PF02543	Carbamoyltransferase N-terminus	GO:0009058	biosynthetic process	GO:0003824	catalytic activity	--	--	KOG2707	Predicted metalloprotease with chaperone activity (RNAse H/HSP70 fold)
Cluster-31803.27252	0	263.032	#NAME?	1.96e-08	3981	552836634	XP_005849201.1	272	2.2e-21	hypothetical protein CHLNCDRAFT_143907 [Chlorella variabilis]>gi|307108860|gb|EFN57099.1| hypothetical protein CHLNCDRAFT_143907 [Chlorella variabilis]	--	--	--	--	--	--	--	--	--	--	--	--	--	PF07365//PF05104//PF00023//PF06512//PF13606	Alpha conotoxin precursor//Ribosome receptor lysine/proline rich region//Ankyrin repeat//Sodium ion transport-associated//Ankyrin repeat	GO:0007268//GO:0006814//GO:0009405//GO:0015031//GO:0007165	synaptic transmission//sodium ion transport//pathogenesis//protein transport//signal transduction	GO:0005248//GO:0030550//GO:0005515	voltage-gated sodium channel activity//acetylcholine receptor inhibitor activity//protein binding	GO:0030176//GO:0005576//GO:0001518	integral component of endoplasmic reticulum membrane//extracellular region//voltage-gated sodium channel complex	--	--
Cluster-31803.47537	72.9928	834.156	-3.5145	2.03e-08	255	552846181	XP_005851548.1	443	2.1e-42	hypothetical protein CHLNCDRAFT_29581 [Chlorella variabilis]>gi|307111211|gb|EFN59446.1| hypothetical protein CHLNCDRAFT_29581 [Chlorella variabilis]			161	5.16e-77		--	--	--	--	B1JRH0	322	3.1e-29	Hydroxylamine reductase OS=Yersinia pseudotuberculosis serotype O:3 (strain YPIII) GN=hcp PE=3 SV=1	PF03063	Prismane/CO dehydrogenase family	GO:0055114	oxidation-reduction process	GO:0051536//GO:0016661//GO:0016491	iron-sulfur cluster binding//oxidoreductase activity, acting on other nitrogenous compounds as donors//oxidoreductase activity	GO:0005737	cytoplasm	--	--
Cluster-31803.18748	183.154	1537.43	-3.0694	2.04e-08	3001	552842641	XP_005850624.1	745	2.3e-76	hypothetical protein CHLNCDRAFT_17265, partial [Chlorella variabilis]>gi|307110286|gb|EFN58522.1| hypothetical protein CHLNCDRAFT_17265, partial [Chlorella variabilis]	--	--	--	--	--	--	--	--	--	--	--	--	--	PF02971//PF07837//PF01213	Formiminotransferase domain//Formiminotransferase domain, N-terminal subdomain//Adenylate cyclase associated (CAP) N terminal	GO:0008152//GO:0007010	metabolic process//cytoskeleton organization	GO:0005542//GO:0016740//GO:0003779	folic acid binding//transferase activity//actin binding	--	--	--	--
Cluster-31803.28294	907.803	6098.92	-2.7481	2.06e-08	1063	--	--	--	--	--	--	--	--	--	--	--	--	--	--	--	--	--	--	--	--	--	--	--	--	--	--	--	--
Cluster-31803.38253	974.591	101.688	3.2606	2.15e-08	3679	552824389	XP_005846580.1	1978	3e-219	hypothetical protein CHLNCDRAFT_35898 [Chlorella variabilis]>gi|307106232|gb|EFN54478.1| hypothetical protein CHLNCDRAFT_35898 [Chlorella variabilis]			642	0		K00818	E2.6.1.11, argD	acetylornithine aminotransferase	http://www.genome.jp/dbget-bin/www_bget?ko:K00818	Q9M8M7	1194	3.5e-129	Acetylornithine aminotransferase, chloroplastic/mitochondrial OS=Arabidopsis thaliana GN=WIN1 PE=1 SV=1	PF10589//PF12937//PF00646//PF00202	NADH-ubiquinone oxidoreductase-F iron-sulfur binding region//F-box-like//F-box domain//Aminotransferase class-III	GO:0006525	arginine metabolic process	GO:0005515//GO:0008483//GO:0051539//GO:0030170	protein binding//transaminase activity//4 iron, 4 sulfur cluster binding//pyridoxal phosphate binding	--	--	KOG1402	Ornithine aminotransferase
Cluster-31803.78489	575.18	3956.6	-2.7822	2.17e-08	4456	552839387	XP_005849787.1	950	5.9e-100	hypothetical protein CHLNCDRAFT_142876 [Chlorella variabilis]>gi|307109447|gb|EFN57685.1| hypothetical protein CHLNCDRAFT_142876 [Chlorella variabilis]	--	--	--	--	--	--	--	--	--	--	--	--	--	--	--	GO:0090399//GO:0000077//GO:0016572//GO:0000723//GO:0006281//GO:0016310//GO:0009069//GO:0010212	replicative senescence//DNA damage checkpoint//histone phosphorylation//telomere maintenance//DNA repair//phosphorylation//serine family amino acid metabolic process//response to ionizing radiation	GO:0004674	protein serine/threonine kinase activity	--	--	--	--
Cluster-31803.103670	9.86939	1770.81	-7.4872	2.18e-08	2530	--	--	--	--	--			68	2.89e-24		--	--	--	--	--	--	--	--	--	--	--	--	--	--	--	--	--	--
Cluster-31803.63387	1235.39	135.956	3.1838	2.21e-08	2648	552809596	XP_005842978.1	552	5e-54	hypothetical protein CHLNCDRAFT_141673 [Chlorella variabilis]>gi|307102606|gb|EFN50876.1| hypothetical protein CHLNCDRAFT_141673 [Chlorella variabilis]	--	--	--	--	--	--	--	--	--	Q5PP37	287	3.7e-24	Histone-lysine N-methyltransferase ATXR2 OS=Arabidopsis thaliana GN=ATXR2 PE=2 SV=1	PF10280	Mediator complex protein	GO:0006357	regulation of transcription from RNA polymerase II promoter	GO:0001104	RNA polymerase II transcription cofactor activity	GO:0016592	mediator complex	--	--
Cluster-31803.103217	40.1651	642.123	-3.9988	2.22e-08	304	--	--	--	--	--	--	--	--	--	--	--	--	--	--	--	--	--	--	--	--	--	--	--	--	--	--	--	--
Cluster-31803.105404	23.4401	433.8	-4.21	2.28e-08	1206	--	--	--	--	--	--	--	--	--	--	--	--	--	--	--	--	--	--	--	--	--	--	--	--	--	--	--	--
Cluster-31803.64156	106.753	1056.1	-3.3064	2.34e-08	3560	552823515	XP_005846377.1	992	6.4e-105	hypothetical protein CHLNCDRAFT_31851 [Chlorella variabilis]>gi|307106028|gb|EFN54275.1| hypothetical protein CHLNCDRAFT_31851 [Chlorella variabilis]			305	7.3e-156		--	--	--	--	Q8LPQ6	337	8e-30	ABC transporter B family member 28 OS=Arabidopsis thaliana GN=ABCB28 PE=2 SV=1	PF00664//PF02289//PF07941	ABC transporter transmembrane region//Cyclohydrolase (MCH)//Potassium channel Kv1.4 tandem inactivation domain	GO:0046656//GO:0006813//GO:0006200//GO:0006810//GO:0006807//GO:0006730//GO:0055085	folic acid biosynthetic process//potassium ion transport//obsolete ATP catabolic process//transport//nitrogen compound metabolic process//one-carbon metabolic process//transmembrane transport	GO:0005249//GO:0005524//GO:0018759//GO:0030955//GO:0042626	voltage-gated potassium channel activity//ATP binding//methenyltetrahydromethanopterin cyclohydrolase activity//potassium ion binding//ATPase activity, coupled to transmembrane movement of substances	GO:0008076//GO:0016021	voltage-gated potassium channel complex//integral component of membrane	KOG0058	Peptide exporter, ABC superfamily
Cluster-31803.103187	7.59873	273.882	-5.1717	2.57e-08	783	--	--	--	--	--	--	--	--	--	--	--	--	--	--	--	--	--	--	PF00107	Zinc-binding dehydrogenase	GO:0055114	oxidation-reduction process	--	--	--	--	--	--
Cluster-31803.103153	63.1622	1402.73	-4.473	2.58e-08	1517	--	--	--	--	--	--	--	--	--	--	--	--	--	--	--	--	--	--	--	--	--	--	--	--	--	--	--	--
Cluster-31803.10981	0	136.295	#NAME?	2.69e-08	3436	695069731	XP_009381860.1	270	3.2e-21	PREDICTED: keratin-associated protein 5-1-like [Musa acuminata subsp. malaccensis]	--	--	--	--	--	--	--	--	--	O57409	176	3.6e-11	Delta-like protein B OS=Danio rerio GN=dlb PE=1 SV=1	PF08046	IlvGEDA operon leader peptide	GO:0009082	branched-chain amino acid biosynthetic process	--	--	--	--	--	--
Cluster-31803.96251	41.1382	986.127	-4.5832	2.69e-08	2267	552810937	XP_005843332.1	797	1.7e-82	hypothetical protein CHLNCDRAFT_10735, partial [Chlorella variabilis]>gi|307102965|gb|EFN51230.1| hypothetical protein CHLNCDRAFT_10735, partial [Chlorella variabilis]			151	1.88e-70		--	--	--	--	Q9FPR3	559	9.2e-56	Serine/threonine-protein kinase EDR1 OS=Arabidopsis thaliana GN=EDR1 PE=1 SV=1	PF00069//PF07714	Protein kinase domain//Protein tyrosine kinase	GO:0006468	protein phosphorylation	GO:0004672//GO:0005524	protein kinase activity//ATP binding	--	--	--	--
Cluster-31803.42225	166.114	0	Inf	2.76e-08	7218	552839968	XP_005849929.1	691	1e-69	hypothetical protein CHLNCDRAFT_143243 [Chlorella variabilis]>gi|307109589|gb|EFN57827.1| hypothetical protein CHLNCDRAFT_143243 [Chlorella variabilis]			231	2.04e-114		--	--	--	--	Q8S9L5	178	4.4e-11	Trigger factor-like protein TIG, Chloroplastic OS=Arabidopsis thaliana GN=TIG PE=2 SV=1	PF01428//PF05698//PF00847//PF00451	AN1-like Zinc finger//Bacterial trigger factor protein (TF) C-terminus//AP2 domain//Scorpion short toxin, BmKK2	GO:0006810//GO:0015031//GO:0009405//GO:0006355//GO:0006457	transport//protein transport//pathogenesis//regulation of transcription, DNA-templated//protein folding	GO:0003700//GO:0008270//GO:0008200	transcription factor activity, sequence-specific DNA binding//zinc ion binding//ion channel inhibitor activity	GO:0005667//GO:0005576	transcription factor complex//extracellular region	--	--
Cluster-31803.10264	164.456	1379	-3.0678	2.77e-08	2190	--	--	--	--	--	--	--	--	--	--	--	--	--	--	--	--	--	--	PF10392//PF05531//PF16647//PF06009//PF04977//PF06005//PF00426//PF00643//PF03007//PF04136//PF04513//PF17082	Golgi transport complex subunit 5//Nucleopolyhedrovirus P10 protein//Granulocyte colony-stimulating factor//Laminin Domain II//Septum formation initiator//Protein of unknown function (DUF904)//Outer Capsid protein VP4 (Hemagglutinin)//B-box zinc finger//Wax ester synthase-like Acyl-CoA acyltransferase domain//Sec34-like family//Baculovirus polyhedron envelope protein, PEP, C terminus//Spindle Pol…	GO:0045017//GO:0046486//GO:0019058//GO:0006955//GO:0042967//GO:0030474//GO:0007155//GO:0006886//GO:0000917//GO:0043093//GO:0006891//GO:0007049//GO:0007165	glycerolipid biosynthetic process//glycerolipid metabolic process//viral life cycle//immune response//acyl-carrier-protein biosynthetic process//spindle pole body duplication//cell adhesion//intracellular protein transport//barrier septum assembly//FtsZ-dependent cytokinesis//intra-Golgi vesicle-mediated transport//cell cycle//signal transduction	GO:0008270//GO:0005198//GO:0005200//GO:0005125//GO:0004144	zinc ion binding//structural molecule activity//structural constituent of cytoskeleton//cytokine activity//diacylglycerol O-acyltransferase activity	GO:0016020//GO:0005856//GO:0005737//GO:0019031//GO:0005622//GO:0005823//GO:0017119//GO:0005576//GO:0005801//GO:0019028	membrane//cytoskeleton//cytoplasm//viral envelope//intracellular//central plaque of spindle pole body//Golgi transport complex//extracellular region//cis-Golgi network//viral capsid	--	--
Cluster-31803.86825	1439.15	9420.15	-2.7105	2.79e-08	5415	552843766	XP_005850924.1	1314	4.4e-142	hypothetical protein CHLNCDRAFT_140645 [Chlorella variabilis]>gi|307110586|gb|EFN58822.1| hypothetical protein CHLNCDRAFT_140645 [Chlorella variabilis]			474	0		K00773	tgt, QTRT1	queuine tRNA-ribosyltransferase	http://www.genome.jp/dbget-bin/www_bget?ko:K00773	Q7SYK1	816	3.5e-85	Queuine tRNA-ribosyltransferase OS=Danio rerio GN=qtrt1 PE=2 SV=1	PF00528//PF00089//PF01702	Binding-protein-dependent transport system inner membrane component//Trypsin//Queuine tRNA-ribosyltransferase	GO:0006508//GO:0008616//GO:0006400//GO:0006810	proteolysis//queuosine biosynthetic process//tRNA modification//transport	GO:0004252//GO:0008479	serine-type endopeptidase activity//queuine tRNA-ribosyltransferase activity	GO:0016020	membrane	KOG3908	Queuine-tRNA ribosyltransferase
Cluster-31803.36975	72.3392	791.739	-3.4522	2.98e-08	297	--	--	--	--	--	--	--	--	--	--	--	--	--	--	--	--	--	--	--	--	--	--	--	--	--	--	--	--
Cluster-31803.91933	120.718	1119.81	-3.2135	3.01e-08	3535	--	--	--	--	--	--	--	--	--	--	--	--	--	--	--	--	--	--	PF04612	Type II secretion system (T2SS), protein M	GO:0006858	extracellular transport	--	--	--	--	--	--
Cluster-31803.42715	4427.61	26856.3	-2.6007	3.16e-08	3304	301507726	ADK77883.1	1019	4.4e-108	hydrogenase [Chlorella sp. DT]			146	1.65e-67		--	--	--	--	Q46508	761	5e-79	NADP-reducing hydrogenase subunit HndC OS=Desulfovibrio fructosivorans GN=hndD PE=1 SV=1	PF01607	Chitin binding Peritrophin-A domain	GO:0006030	chitin metabolic process	GO:0008061	chitin binding	GO:0005576	extracellular region	--	--
Cluster-31803.80029	10.0509	294.946	-4.875	3.2e-08	258	552810930	XP_005843330.1	201	2.4e-14	hypothetical protein CHLNCDRAFT_141231 [Chlorella variabilis]>gi|307102963|gb|EFN51228.1| hypothetical protein CHLNCDRAFT_141231 [Chlorella variabilis]			63	1.57e-22		K00472	E1.14.11.2	prolyl 4-hydroxylase	http://www.genome.jp/dbget-bin/www_bget?ko:K00472	Q24JN5	166	3.8e-11	Prolyl 4-hydroxylase 5 OS=Arabidopsis thaliana GN=P4H5 PE=2 SV=1	--	--	GO:0055114	oxidation-reduction process	GO:0005506//GO:0016706//GO:0031418	iron ion binding//oxidoreductase activity, acting on paired donors, with incorporation or reduction of molecular oxygen, 2-oxoglutarate as one donor, and incorporation of one atom each of oxygen into both donors//L-ascorbic acid binding	--	--	--	--
Cluster-31803.52799	23.3941	425.988	-4.1866	3.41e-08	1273	761975316	KIZ05291.1	394	5e-36	cysteine desulfurase / selenocysteine lyase [Monoraphidium neglectum]	--	--	--	--	--	K11717	sufS	cysteine desulfurase / selenocysteine lyase	http://www.genome.jp/dbget-bin/www_bget?ko:K11717	Q93WX6	357	1.4e-32	Cysteine desulfurase 1, chloroplastic OS=Arabidopsis thaliana GN=NFS2 PE=1 SV=1	--	--	--	--	--	--	--	--	--	--
Cluster-31803.9760	0	129.946	#NAME?	3.5e-08	3195	--	--	--	--	--			397	0		--	--	--	--	Q44585	170	1.7e-10	Nickel-cobalt-cadmium resistance protein NccB OS=Alcaligenes xylosoxydans xylosoxydans GN=nccB PE=3 SV=1	PF02321//PF06971//PF00440	Outer membrane efflux protein//Putative DNA-binding protein N-terminus//Bacterial regulatory proteins, tetR family	GO:0051775//GO:0045892//GO:0006810	response to redox state//negative regulation of transcription, DNA-templated//transport	GO:0005215//GO:0003677	transporter activity//DNA binding	GO:0005737	cytoplasm	--	--
Cluster-31803.102008	24.1131	421.946	-4.1292	3.62e-08	979	--	--	--	--	--	--	--	--	--	--	--	--	--	--	--	--	--	--	--	--	--	--	--	--	--	--	--	--
Cluster-31803.56015	250.821	1966.21	-2.9707	3.65e-08	231	--	--	--	--	--	--	--	--	--	--	--	--	--	--	--	--	--	--	--	--	--	--	--	--	--	--	--	--
Cluster-31803.81957	399.503	11568.7	-4.8559	3.67e-08	950	--	--	--	--	--	--	--	--	--	--	--	--	--	--	--	--	--	--	--	--	--	--	--	--	--	--	--	--
Cluster-31803.97294	440.869	10927.4	-4.6315	3.67e-08	3120	552816902	XP_005844804.1	1432	5.3e-156	hypothetical protein CHLNCDRAFT_138705 [Chlorella variabilis]>gi|307104448|gb|EFN52702.1| hypothetical protein CHLNCDRAFT_138705 [Chlorella variabilis]	--	--	--	--	--	K11886	ECM29	proteasome component ECM29	http://www.genome.jp/dbget-bin/www_bget?ko:K11886	Q6PDI5	423	7.4e-40	Proteasome-associated protein ECM29 homolog OS=Mus musculus GN=Ecm29 PE=1 SV=3	PF02985//PF01429	HEAT repeat//Methyl-CpG binding domain	--	--	GO:0005515//GO:0003677	protein binding//DNA binding	GO:0005634	nucleus	KOG0915	Uncharacterized conserved protein
Cluster-31803.79727	2.53936	197.231	-6.2793	3.82e-08	1056	552828940	XP_005847586.1	888	2.2e-93	hypothetical protein CHLNCDRAFT_35417 [Chlorella variabilis]>gi|307107241|gb|EFN55484.1| hypothetical protein CHLNCDRAFT_35417 [Chlorella variabilis]			318	1.26e-163		K06911	K06911	uncharacterized protein	http://www.genome.jp/dbget-bin/www_bget?ko:K06911	P58112	478	1.1e-46	Pirin-like protein CC_0481 OS=Caulobacter crescentus (strain ATCC 19089 / CB15) GN=CC_0481 PE=3 SV=1	--	--	--	--	--	--	--	--	--	--
Cluster-31803.106592	12.9558	324.985	-4.6487	3.98e-08	4451	--	--	--	--	--	--	--	--	--	--	--	--	--	--	--	--	--	--	PF12470//PF01436	Suppressor of Fused Gli/Ci N terminal binding domain//NHL repeat	--	--	GO:0005515	protein binding	--	--	--	--
Cluster-31803.101797	0.7117	155.93	-7.7754	4.07e-08	1781	--	--	--	--	--	--	--	--	--	--	--	--	--	--	--	--	--	--	--	--	--	--	--	--	--	--	--	--
Cluster-12000.0	0.365533	143.083	-8.6126	4.24e-08	3364	255596088	XP_002536457.1	326	1e-27	Cation efflux system protein czcA, putative [Ricinus communis]>gi|223519624|gb|EEF25926.1| Cation efflux system protein czcA, putative, partial [Ricinus communis]			1483	0		--	--	--	--	D0ZEW1	608	2.8e-61	Multidrug resistance protein MdtB OS=Edwardsiella tarda (strain EIB202) GN=mdtB PE=3 SV=1	PF00873//PF02460	AcrB/AcrD/AcrF family//Patched family	GO:0006810//GO:0007165	transport//signal transduction	GO:0008158//GO:0005215	hedgehog receptor activity//transporter activity	GO:0016020	membrane	--	--
Cluster-31803.10928	0	129.561	#NAME?	4.27e-08	3063	552840784	XP_005850140.1	331	2.4e-28	hypothetical protein CHLNCDRAFT_34430 [Chlorella variabilis]>gi|307109801|gb|EFN58038.1| hypothetical protein CHLNCDRAFT_34430 [Chlorella variabilis]			88	2.67e-35		K09500	CCT8	T-complex protein 1 subunit theta	http://www.genome.jp/dbget-bin/www_bget?ko:K09500	Q6EE31	200	5.3e-14	T-complex protein 1 subunit theta OS=Gallus gallus GN=CCT8 PE=1 SV=3	PF00118	TCP-1/cpn60 chaperonin family	GO:0044267	cellular protein metabolic process	GO:0005524//GO:0000166	ATP binding//nucleotide binding	--	--	KOG0362	Chaperonin complex component, TCP-1 theta subunit (CCT8)
Cluster-31803.103355	27.2383	457.716	-4.0707	4.27e-08	713	552838743	XP_005849643.1	271	5.1e-22	hypothetical protein CHLNCDRAFT_143169 [Chlorella variabilis]>gi|307109303|gb|EFN57541.1| hypothetical protein CHLNCDRAFT_143169 [Chlorella variabilis]	--	--	--	--	--	--	--	--	--	--	--	--	--	PF03820	Tricarboxylate carrier	GO:0006811//GO:0055085	ion transport//transmembrane transport	GO:0015075	ion transmembrane transporter activity	GO:0016020	membrane	--	--
Cluster-31803.12105	160.14	0	Inf	4.3e-08	5251	552841168	XP_005850234.1	488	2.6e-46	hypothetical protein CHLNCDRAFT_14837, partial [Chlorella variabilis]>gi|307109895|gb|EFN58132.1| hypothetical protein CHLNCDRAFT_14837, partial [Chlorella variabilis]			141	1.59e-64		K04794	PTH2	peptidyl-tRNA hydrolase, PTH2 family	http://www.genome.jp/dbget-bin/www_bget?ko:K04794	Q3ZBL5	312	9.3e-27	Peptidyl-tRNA hydrolase 2, mitochondrial OS=Bos taurus GN=PTRH2 PE=2 SV=1	PF12619//PF01660//PF08559//PF01981	Mini-chromosome maintenance protein 2//Viral methyltransferase//Cut8, nuclear proteasome tether protein//Peptidyl-tRNA hydrolase PTH2	GO:0080009//GO:0006270//GO:0031144//GO:0006396//GO:0009451//GO:0071630	mRNA methylation//DNA replication initiation//proteasome localization//RNA processing//RNA modification//nucleus-associated proteasomal ubiquitin-dependent protein catabolic process	GO:0003723//GO:0003677//GO:0005524//GO:0003678//GO:0004045//GO:0008174	RNA binding//DNA binding//ATP binding//DNA helicase activity//aminoacyl-tRNA hydrolase activity//mRNA methyltransferase activity	GO:0042555//GO:0005634//GO:0005657	MCM complex//nucleus//replication fork	KOG3282	Uncharacterized conserved protein
Cluster-31803.45484	56.2945	658.244	-3.5476	4.31e-08	3722	552828162	XP_005847413.1	1771	3.1e-195	hypothetical protein CHLNCDRAFT_134278 [Chlorella variabilis]>gi|307107067|gb|EFN55311.1| hypothetical protein CHLNCDRAFT_134278 [Chlorella variabilis]			333	2.08e-171		K17759	AIBP, nnrE	NAD(P)H-hydrate epimerase	http://www.genome.jp/dbget-bin/www_bget?ko:K00275,K17759	Q9LTX3	1244	5.6e-135	Pyridoxine/pyridoxamine 5'-phosphate oxidase 1, chloroplastic OS=Arabidopsis thaliana GN=PPOX1 PE=1 SV=1	PF00320//PF01243//PF10590//PF12766	GATA zinc finger//Pyridoxamine 5'-phosphate oxidase//Pyridoxine 5'-phosphate oxidase C-terminal dimerisation region//Pyridoxamine 5'-phosphate oxidase	GO:0055114//GO:0042823//GO:0006355//GO:0008615	oxidation-reduction process//pyridoxal phosphate biosynthetic process//regulation of transcription, DNA-templated//pyridoxine biosynthetic process	GO:0008270//GO:0043565//GO:0010181//GO:0016638//GO:0003700//GO:0004733	zinc ion binding//sequence-specific DNA binding//FMN binding//oxidoreductase activity, acting on the CH-NH2 group of donors//transcription factor activity, sequence-specific DNA binding//pyridoxamine-phosphate oxidase activity	GO:0005667	transcription factor complex	KOG2585	Uncharacterized conserved protein
Cluster-31803.104043	0	149.949	#NAME?	4.52e-08	1113	--	--	--	--	--	--	--	--	--	--	--	--	--	--	--	--	--	--	--	--	--	--	--	--	--	--	--	--
Cluster-31803.45064	0	131.939	#NAME?	4.69e-08	2021	552834459	XP_005848734.1	373	2.2e-33	expressed protein [Chlorella variabilis]>gi|307108392|gb|EFN56632.1| expressed protein [Chlorella variabilis]	--	--	--	--	--	--	--	--	--	--	--	--	--	PF08036	Diapausin family of antimicrobial peptide	GO:0050832	defense response to fungus	--	--	GO:0005576	extracellular region	--	--
Cluster-31803.51731	590.394	3960.26	-2.7458	4.89e-08	7018	552828273	XP_005847443.1	3499	0	hypothetical protein CHLNCDRAFT_134349 [Chlorella variabilis]>gi|307107097|gb|EFN55341.1| hypothetical protein CHLNCDRAFT_134349 [Chlorella variabilis]			874	0		--	--	--	--	P94692	2391	1e-267	Pyruvate synthase OS=Desulfovibrio africanus GN=por PE=1 SV=1	PF10371//PF01558//PF15171//PF02780//PF01855//PF02163//PF00720//PF01284	Domain of unknown function//Pyruvate ferredoxin/flavodoxin oxidoreductase//Neuropeptide secretory protein family, NPQ, spexin//Transketolase, C-terminal domain//Pyruvate flavodoxin/ferredoxin oxidoreductase, thiamine diP-bdg//Peptidase family M50//Subtilisin inhibitor-like//Membrane-associating domain	GO:0055114//GO:0008152//GO:0007218//GO:0006508	oxidation-reduction process//metabolic process//neuropeptide signaling pathway//proteolysis	GO:0005184//GO:0004222//GO:0003824//GO:0004867//GO:0043169//GO:0016491//GO:0016903	neuropeptide hormone activity//metalloendopeptidase activity//catalytic activity//serine-type endopeptidase inhibitor activity//cation binding//oxidoreductase activity//oxidoreductase activity, acting on the aldehyde or oxo group of donors	GO:0016020	membrane	--	--
Cluster-31803.63651	477.759	33.903	3.8168	4.95e-08	4766	545367153	XP_005648431.1	1341	2.9e-145	hypothetical protein COCSUDRAFT_62417 [Coccomyxa subellipsoidea C-169]>gi|384250408|gb|EIE23887.1| hypothetical protein COCSUDRAFT_62417 [Coccomyxa subellipsoidea C-169]	--	--	--	--	--	--	--	--	--	Q9C9Z9	1032	2.7e-110	Glycosyltransferase-like KOBITO 1 OS=Arabidopsis thaliana GN=ELD1 PE=1 SV=1	--	--	--	--	--	--	--	--	--	--
Cluster-31803.110206	652.484	40.7303	4.0018	5.12e-08	619	552830447	XP_005847906.1	966	1.1e-102	hypothetical protein CHLNCDRAFT_56139 [Chlorella variabilis]>gi|307107562|gb|EFN55804.1| hypothetical protein CHLNCDRAFT_56139 [Chlorella variabilis]			107	1.42e-46		K01539	ATP1A	sodium/potassium-transporting ATPase subunit alpha	http://www.genome.jp/dbget-bin/www_bget?ko:K01539	Q92030	648	1.2e-66	Sodium/potassium-transporting ATPase subunit alpha-1 OS=Anguilla anguilla GN=atp1a1 PE=2 SV=1	--	--	GO:0006812//GO:0006754	cation transport//ATP biosynthetic process	GO:0015662//GO:0046872//GO:0005524	ATPase activity, coupled to transmembrane movement of ions, phosphorylative mechanism//metal ion binding//ATP binding	GO:0016021	integral component of membrane	KOG0203	Na+/K+ ATPase, alpha subunit
Cluster-31803.101375	4.2702	216.352	-5.6629	5.23e-08	3924	552813028	XP_005843848.1	2524	1.6e-282	hypothetical protein CHLNCDRAFT_32823 [Chlorella variabilis]>gi|307103487|gb|EFN51746.1| hypothetical protein CHLNCDRAFT_32823 [Chlorella variabilis]			795	0		K12392	AP1B1	AP-1 complex subunit beta-1	http://www.genome.jp/dbget-bin/www_bget?ko:K12392	Q9SUS3	2148	8.8e-240	Beta-adaptin-like protein B OS=Arabidopsis thaliana GN=BETAB-AD PE=1 SV=1	PF01284//PF02985//PF00514//PF01602	Membrane-associating domain//HEAT repeat//Armadillo/beta-catenin-like repeat//Adaptin N terminal region	GO:0006886//GO:0015031//GO:0016192	intracellular protein transport//protein transport//vesicle-mediated transport	GO:0005515//GO:0008565	protein binding//protein transporter activity	GO:0030131//GO:0016020//GO:0030117	clathrin adaptor complex//membrane//membrane coat	KOG1061	Vesicle coat complex AP-1/AP-2/AP-4, beta subunit
Cluster-31803.15029	519.36	3511.2	-2.7572	5.39e-08	900	552826130	XP_005846961.1	513	5.6e-50	expressed protein [Chlorella variabilis]>gi|307106614|gb|EFN54859.1| expressed protein [Chlorella variabilis]	--	--	--	--	--	--	--	--	--	--	--	--	--	--	--	--	--	--	--	--	--	--	--
Cluster-31803.29348	152.781	1304.14	-3.0936	5.4e-08	5642	552828732	XP_005847543.1	1445	3e-157	hypothetical protein CHLNCDRAFT_133737 [Chlorella variabilis]>gi|307107198|gb|EFN55441.1| hypothetical protein CHLNCDRAFT_133737 [Chlorella variabilis]	--	--	--	--	--	--	--	--	--	P26221	528	9e-52	Endoglucanase E-4 OS=Thermobifida fusca GN=celD PE=1 SV=2	PF00759	Glycosyl hydrolase family 9	GO:0005975	carbohydrate metabolic process	GO:0004553	hydrolase activity, hydrolyzing O-glycosyl compounds	--	--	--	--
Cluster-31803.75288	381.534	2629.89	-2.7851	5.42e-08	1456	760439011	XP_011396574.1	344	3.6e-30	hypothetical protein F751_0912 [Auxenochlorella protothecoides]>gi|675351258|gb|KFM23698.1| hypothetical protein F751_0912 [Auxenochlorella protothecoides]	--	--	--	--	--	--	--	--	--	--	--	--	--	PF04801//PF02538//PF02862	Sin-like protein conserved region//Hydantoinase B/oxoprolinase//DDHD domain	GO:0006144//GO:0006206//GO:0006351	purine nucleobase metabolic process//pyrimidine nucleobase metabolic process//transcription, DNA-templated	GO:0003824//GO:0003899//GO:0046872	catalytic activity//DNA-directed RNA polymerase activity//metal ion binding	GO:0005730//GO:0005634	nucleolus//nucleus	--	--
Cluster-31803.99855	42.0339	563.479	-3.7447	5.43e-08	1069	--	--	--	--	--	--	--	--	--	--	--	--	--	--	--	--	--	--	PF09606	ARC105 or Med15 subunit of Mediator complex non-fungal	GO:0006357	regulation of transcription from RNA polymerase II promoter	GO:0001104	RNA polymerase II transcription cofactor activity	GO:0016592	mediator complex	--	--
Cluster-31803.95961	1024.79	121.48	3.0765	5.63e-08	2123	552837096	XP_005849286.1	1614	2.8e-177	hypothetical protein CHLNCDRAFT_34863 [Chlorella variabilis]>gi|307108945|gb|EFN57184.1| hypothetical protein CHLNCDRAFT_34863 [Chlorella variabilis]			609	0		K04040	chlG, bchG	chlorophyll synthase	http://www.genome.jp/dbget-bin/www_bget?ko:K04040	Q38833	1204	1.4e-130	Chlorophyll synthase, chloroplastic OS=Arabidopsis thaliana GN=CHLG PE=2 SV=1	PF01040	UbiA prenyltransferase family	GO:0030494	bacteriochlorophyll biosynthetic process	GO:0046408//GO:0004659	chlorophyll synthetase activity//prenyltransferase activity	GO:0016021	integral component of membrane	--	--
Cluster-31803.78911	664.8	55.5663	3.5806	5.74e-08	5809	552824157	XP_005846534.1	1771	4.8e-195	hypothetical protein CHLNCDRAFT_31829 [Chlorella variabilis]>gi|307106185|gb|EFN54432.1| hypothetical protein CHLNCDRAFT_31829 [Chlorella variabilis]			722	0		K00972	UAP1	UDP-N-acetylglucosamine/UDP-N-acetylgalactosamine diphosphorylase	http://www.genome.jp/dbget-bin/www_bget?ko:K00972	Q940S3	1003	7.7e-107	UDP-N-acetylglucosamine diphosphorylase 1 OS=Arabidopsis thaliana GN=GLCNAC1PUT1 PE=1 SV=1	PF01704//PF06156//PF00435//PF00781//PF01025//PF10473//PF04546//PF00609	UTP--glucose-1-phosphate uridylyltransferase//Protein of unknown function (DUF972)//Spectrin repeat//Diacylglycerol kinase catalytic domain//GrpE//Leucine-rich repeats of kinetochore protein Cenp-F/LEK1//Sigma-70, non-essential region//Diacylglycerol kinase accessory domain	GO:0007205//GO:0006355//GO:0008152//GO:0046486//GO:0009395//GO:0006352//GO:0006457//GO:0006260	protein kinase C-activating G-protein coupled receptor signaling pathway//regulation of transcription, DNA-templated//metabolic process//glycerolipid metabolic process//phospholipid catabolic process//DNA-templated transcription, initiation//protein folding//DNA replication	GO:0005515//GO:0045502//GO:0000774//GO:0016301//GO:0070569//GO:0004143//GO:0042803//GO:0016779//GO:0008134//GO:0051087//GO:0003677//GO:0016987//GO:0003700	protein binding//dynein binding//adenyl-nucleotide exchange factor activity//kinase activity//uridylyltransferase activity//diacylglycerol kinase activity//protein homodimerization activity//nucleotidyltransferase activity//transcription factor binding//chaperone binding//DNA binding//sigma factor activity//transcription factor activity, sequence-specific DNA binding	GO:0030286//GO:0005667	dynein complex//transcription factor complex	KOG2388	UDP-N-acetylglucosamine pyrophosphorylase
Cluster-31803.104274	279.502	9.04081	4.9503	6.37e-08	1870	552831568	XP_005848164.1	141	1.6e-06	hypothetical protein CHLNCDRAFT_145535 [Chlorella variabilis]>gi|307107820|gb|EFN56062.1| hypothetical protein CHLNCDRAFT_145535 [Chlorella variabilis]	--	--	--	--	--	--	--	--	--	--	--	--	--	--	--	--	--	--	--	--	--	--	--
Cluster-31803.84417	95.2443	922.096	-3.2752	6.37e-08	2823	552832776	XP_005848406.1	423	4.8e-39	expressed protein [Chlorella variabilis]>gi|307108063|gb|EFN56304.1| expressed protein [Chlorella variabilis]			36	1.99e-06		K09680	coaW	type II pantothenate kinase	http://www.genome.jp/dbget-bin/www_bget?ko:K09680	Q8L5Y9	282	1.5e-23	Pantothenate kinase 2 OS=Arabidopsis thaliana GN=PANK2 PE=1 SV=2	PF04577	Protein of unknown function (DUF563)	--	--	GO:0016757	transferase activity, transferring glycosyl groups	--	--	KOG4584	Uncharacterized conserved protein
Cluster-31803.30205	86.7282	871.514	-3.329	6.58e-08	349	661889457	CDP07044.1	178	1.5e-11	unnamed protein product [Coffea canephora]	--	--	--	--	--	K16298	SCPL-IV	serine carboxypeptidase-like clade IV	http://www.genome.jp/dbget-bin/www_bget?ko:K16298	P32826	155	9.8e-10	Serine carboxypeptidase-like 49 OS=Arabidopsis thaliana GN=SCPL49 PE=2 SV=2	PF00450	Serine carboxypeptidase	GO:0006508	proteolysis	GO:0004185	serine-type carboxypeptidase activity	--	--	KOG1282	Serine carboxypeptidases (lysosomal cathepsin A)
Cluster-31803.11344	120.193	1080.7	-3.1685	6.69e-08	2223	552829380	XP_005847690.1	508	5.3e-49	hypothetical protein CHLNCDRAFT_134115 [Chlorella variabilis]>gi|307107345|gb|EFN55588.1| hypothetical protein CHLNCDRAFT_134115 [Chlorella variabilis]			175	8.37e-84		K15340	DCLRE1A, SNM1A, PSO2	DNA cross-link repair 1A protein	http://www.genome.jp/dbget-bin/www_bget?ko:K15340	Q38961	183	3.6e-12	DNA cross-link repair protein SNM1 OS=Arabidopsis thaliana GN=SNM1 PE=2 SV=1	--	--	--	--	GO:0016787	hydrolase activity	--	--	--	--
Cluster-31803.33479	0	125.562	#NAME?	6.77e-08	2412	552814781	XP_005844275.1	1457	5.2e-159	hypothetical protein CHLNCDRAFT_59016 [Chlorella variabilis]>gi|307103916|gb|EFN52173.1| hypothetical protein CHLNCDRAFT_59016 [Chlorella variabilis]			244	4e-122		--	--	--	--	--	--	--	--	PF01501	Glycosyl transferase family 8	--	--	GO:0016757	transferase activity, transferring glycosyl groups	--	--	--	--
Cluster-31803.49662	6845.92	1097.74	2.6407	6.77e-08	3026	--	--	--	--	--	--	--	--	--	--	--	--	--	--	--	--	--	--	PF00926	3,4-dihydroxy-2-butanone 4-phosphate synthase	GO:0009231	riboflavin biosynthetic process	GO:0008686	3,4-dihydroxy-2-butanone-4-phosphate synthase activity	--	--	--	--
Cluster-31803.107832	173.42	0.753401	7.8466	6.87e-08	2222	552822742	XP_005846194.1	491	4.9e-47	hypothetical protein CHLNCDRAFT_136216 [Chlorella variabilis]>gi|307105844|gb|EFN54092.1| hypothetical protein CHLNCDRAFT_136216 [Chlorella variabilis]			285	5.94e-145		--	--	--	--	Q8RWH8	211	2e-15	Probable magnesium transporter NIPA9 OS=Arabidopsis thaliana GN=At5g11960 PE=2 SV=1	PF00893//PF05653//PF01424//PF00892	Small Multidrug Resistance protein//Magnesium transporter NIPA//R3H domain//EamA-like transporter family	GO:0015693	magnesium ion transport	GO:0003676//GO:0015095	nucleic acid binding//magnesium ion transmembrane transporter activity	GO:0016020//GO:0016021	membrane//integral component of membrane	--	--
Cluster-31803.103477	2.1351	1094.93	-9.0023	6.89e-08	2541	168066292	XP_001785074.1	347	2.8e-30	predicted protein [Physcomitrella patens]>gi|162663334|gb|EDQ50103.1| predicted protein [Physcomitrella patens]	--	--	--	--	--	--	--	--	--	O57409	173	5.9e-11	Delta-like protein B OS=Danio rerio GN=dlb PE=1 SV=1	PF08046	IlvGEDA operon leader peptide	GO:0009082	branched-chain amino acid biosynthetic process	--	--	--	--	--	--
Cluster-31803.66622	708.96	22.263	4.993	6.94e-08	455	552809242	XP_005852324.1	243	5.7e-19	hypothetical protein CHLNCDRAFT_142512 [Chlorella variabilis]>gi|307102514|gb|EFN50787.1| hypothetical protein CHLNCDRAFT_142512 [Chlorella variabilis]	--	--	--	--	--	--	--	--	--	--	--	--	--	PF06954	Resistin	GO:0007165	signal transduction	GO:0005179	hormone activity	GO:0005576	extracellular region	--	--
Cluster-31803.93931	1304.99	8230.59	-2.657	7e-08	2050	552818218	XP_005845139.1	712	1.1e-72	hypothetical protein CHLNCDRAFT_53994 [Chlorella variabilis]>gi|307104785|gb|EFN53037.1| hypothetical protein CHLNCDRAFT_53994 [Chlorella variabilis]			117	1.35e-51		K13101	GPKOW	G patch domain and KOW motifs-containing protein	http://www.genome.jp/dbget-bin/www_bget?ko:K13101	Q9C801	235	3.1e-18	Protein MOS2 OS=Arabidopsis thaliana GN=MOS2 PE=2 SV=1	PF03985//PF07440//PF01585	Paf1//Caerin 1 protein//G-patch domain	GO:0006952//GO:0016570//GO:0006368	defense response//histone modification//transcription elongation from RNA polymerase II promoter	GO:0003676	nucleic acid binding	GO:0016593//GO:0005576	Cdc73/Paf1 complex//extracellular region	--	--
Cluster-31803.20267	211.866	1648.95	-2.9603	7.11e-08	4442	552845318	XP_005851319.1	567	1.5e-55	hypothetical protein CHLNCDRAFT_50087 [Chlorella variabilis]>gi|307110982|gb|EFN59217.1| hypothetical protein CHLNCDRAFT_50087 [Chlorella variabilis]	--	--	--	--	--	--	--	--	--	Q6JHU8	133	4.5e-06	Prolyl 3-hydroxylase 1 OS=Gallus gallus GN=LEPRE1 PE=1 SV=1	PF00481//PF01442//PF13640	Protein phosphatase 2C//Apolipoprotein A1/A4/E domain//2OG-Fe(II) oxygenase superfamily	GO:0055114//GO:0006869//GO:0042157	oxidation-reduction process//lipid transport//lipoprotein metabolic process	GO:0016491//GO:0003824//GO:0008289	oxidoreductase activity//catalytic activity//lipid binding	GO:0005576	extracellular region	--	--
Cluster-31803.95893	1154.4	7329.79	-2.6666	7.26e-08	1443	552812772	XP_005843783.1	491	3.2e-47	hypothetical protein CHLNCDRAFT_139913 [Chlorella variabilis]>gi|307103421|gb|EFN51681.1| hypothetical protein CHLNCDRAFT_139913 [Chlorella variabilis]	--	--	--	--	--	--	--	--	--	F2YMG0	338	2.5e-30	Serine protease 56 OS=Mus musculus GN=Prss56 PE=2 SV=1	PF00089	Trypsin	GO:0006508	proteolysis	GO:0016787//GO:0004252	hydrolase activity//serine-type endopeptidase activity	--	--	--	--
Cluster-31803.65121	57.0231	3157.34	-5.791	7.32e-08	5918	552839855	XP_005849900.1	1537	6.7e-168	hypothetical protein CHLNCDRAFT_143159 [Chlorella variabilis]>gi|307109560|gb|EFN57798.1| hypothetical protein CHLNCDRAFT_143159 [Chlorella variabilis]			420	0		--	--	--	--	P9WLG0	419	4.1e-39	PAPS-dependent sulfotransferase Stf3 OS=Mycobacterium tuberculosis (strain CDC 1551 / Oshkosh) GN=stf3 PE=3 SV=1	PF00685//PF07231//PF02447//PF03301	Sulfotransferase domain//Hs1pro-1 N-terminus//GntP family permease//Tryptophan 2,3-dioxygenase	GO:0019441//GO:0006568//GO:0035429//GO:0015725//GO:0006952	tryptophan catabolic process to kynurenine//tryptophan metabolic process//gluconate transmembrane transport//gluconate transport//defense response	GO:0004833//GO:0020037//GO:0008146//GO:0015128	tryptophan 2,3-dioxygenase activity//heme binding//sulfotransferase activity//gluconate transmembrane transporter activity	GO:0016020	membrane	--	--
Cluster-31803.74993	0	126.094	#NAME?	7.37e-08	2924	552834345	XP_005848706.1	745	2.3e-76	hypothetical protein CHLNCDRAFT_144357, partial [Chlorella variabilis]>gi|307108364|gb|EFN56604.1| hypothetical protein CHLNCDRAFT_144357, partial [Chlorella variabilis]			121	1.15e-53		K10276	FBXL10_11, KDM2	F-box and leucine-rich repeat protein 10/11	http://www.genome.jp/dbget-bin/www_bget?ko:K10276	P0CH95	427	2.4e-40	Histone lysine demethylase PHF8 OS=Danio rerio GN=phf8 PE=1 SV=1	PF00573//PF00739	Ribosomal protein L4/L1 family//Trans-activation protein X	GO:0019079//GO:0042254//GO:0006412	viral genome replication//ribosome biogenesis//translation	GO:0003735	structural constituent of ribosome	GO:0005840	ribosome	KOG1633	F-box protein JEMMA and related proteins with JmjC, PHD, F-box and LRR domains
Cluster-31803.90230	36.9915	514.768	-3.7987	7.39e-08	887	552827694	XP_005847283.1	850	4.6e-89	hypothetical protein CHLNCDRAFT_57961 [Chlorella variabilis]>gi|307106937|gb|EFN55181.1| hypothetical protein CHLNCDRAFT_57961 [Chlorella variabilis]	--	--	--	--	--	--	--	--	--	Q5JQD7	590	9.1e-60	Probable metal-nicotianamine transporter YSL12 OS=Oryza sativa subsp. japonica GN=YSL12 PE=2 SV=2	PF03169	OPT oligopeptide transporter protein	GO:0055085	transmembrane transport	--	--	--	--	--	--
Cluster-31803.16576	0	124.808	#NAME?	7.39e-08	5035	552845920	XP_005851480.1	2257	1.9e-251	hypothetical protein CHLNCDRAFT_137851 [Chlorella variabilis]>gi|307111143|gb|EFN59378.1| hypothetical protein CHLNCDRAFT_137851 [Chlorella variabilis]			674	0		--	--	--	--	Q3YL57	366	4.9e-33	Sodium/hydrogen exchanger 8 OS=Arabidopsis thaliana GN=NHX8 PE=2 SV=1	PF00999	Sodium/hydrogen exchanger family	GO:0006814//GO:0006885//GO:0006812//GO:0055085	sodium ion transport//regulation of pH//cation transport//transmembrane transport	GO:0015299	solute:proton antiporter activity	GO:0016021	integral component of membrane	--	--
Cluster-31803.74467	906.437	48.0503	4.2376	7.41e-08	2388	552847811	XP_005851955.1	337	3.8e-29	hypothetical protein CHLNCDRAFT_49708 [Chlorella variabilis]>gi|307111619|gb|EFN59853.1| hypothetical protein CHLNCDRAFT_49708 [Chlorella variabilis]	--	--	--	--	--	--	--	--	--	--	--	--	--	PF03824	High-affinity nickel-transport protein	GO:0035444//GO:0015675	nickel cation transmembrane transport//nickel cation transport	GO:0015099//GO:0046872	nickel cation transmembrane transporter activity//metal ion binding	GO:0016021	integral component of membrane	--	--
Cluster-31803.57510	50.6784	601.307	-3.5687	7.62e-08	10192	552843018	XP_005850722.1	1714	3.5e-188	hypothetical protein CHLNCDRAFT_19492 [Chlorella variabilis]>gi|307110384|gb|EFN58620.1| hypothetical protein CHLNCDRAFT_19492 [Chlorella variabilis]			139	4e-63		K17285	SELENBP1	selenium-binding protein 1	http://www.genome.jp/dbget-bin/www_bget?ko:K17285	O23264	1348	1.3e-146	Selenium-binding protein 1 OS=Arabidopsis thaliana GN=SBP1 PE=1 SV=1	PF05694//PF00569//PF08100//PF00160	56kDa selenium binding protein (SBP56)//Zinc finger, ZZ type//Dimerisation domain//Cyclophilin type peptidyl-prolyl cis-trans isomerase/CLD	GO:0006457//GO:0000413	protein folding//protein peptidyl-prolyl isomerization	GO:0003755//GO:0008270//GO:0008430//GO:0046983	peptidyl-prolyl cis-trans isomerase activity//zinc ion binding//selenium binding//protein dimerization activity	--	--	KOG0918	Selenium-binding protein
Cluster-31803.59158	1248.11	7817.77	-2.647	7.83e-08	428	552809140	XP_005842870.1	192	4.4e-13	hypothetical protein CHLNCDRAFT_55572 [Chlorella variabilis]>gi|307102485|gb|EFN50758.1| hypothetical protein CHLNCDRAFT_55572 [Chlorella variabilis]	--	--	--	--	--	--	--	--	--	--	--	--	--	PF07562//PF00301	Nine Cysteines Domain of family 3 GPCR//Rubredoxin	GO:0007186	G-protein coupled receptor signaling pathway	GO:0004930//GO:0005506	G-protein coupled receptor activity//iron ion binding	--	--	--	--
Cluster-31803.33982	3.5585	201.856	-5.8259	8.74e-08	5840	552834980	XP_005848871.1	1156	1e-123	hypothetical protein CHLNCDRAFT_144246 [Chlorella variabilis]>gi|307108529|gb|EFN56769.1| hypothetical protein CHLNCDRAFT_144246 [Chlorella variabilis]	--	--	--	--	--	--	--	--	--	--	--	--	--	PF00657//PF01080//PF15761	GDSL-like Lipase/Acylhydrolase//Presenilin//Immortalisation up-regulated protein	--	--	GO:0016788//GO:0004190	hydrolase activity, acting on ester bonds//aspartic-type endopeptidase activity	GO:0016021//GO:0005634	integral component of membrane//nucleus	--	--
Cluster-31803.62968	993.804	111.993	3.1496	8.85e-08	860	545354794	XP_005643230.1	318	2.2e-27	IMP-specific 5-nucleotidase [Coccomyxa subellipsoidea C-169]>gi|384245191|gb|EIE18686.1| IMP-specific 5-nucleotidase [Coccomyxa subellipsoidea C-169]	--	--	--	--	--	K18550	ISN1	IMP and pyridine-specific 5'-nucleotidase	http://www.genome.jp/dbget-bin/www_bget?ko:K18550	--	--	--	--	PF06437	IMP-specific 5'-nucleotidase	GO:0006190//GO:0009117//GO:0016311	inosine salvage//nucleotide metabolic process//dephosphorylation	GO:0050483//GO:0016791//GO:0000287	IMP 5'-nucleotidase activity//phosphatase activity//magnesium ion binding	--	--	--	--
Cluster-31803.80851	153.229	0	Inf	9.04e-08	2406	552817670	XP_005845004.1	1197	7.3e-129	hypothetical protein CHLNCDRAFT_7539, partial [Chlorella variabilis]>gi|307104649|gb|EFN52902.1| hypothetical protein CHLNCDRAFT_7539, partial [Chlorella variabilis]			444	0		K03353	APC6, CDC16	anaphase-promoting complex subunit 6	http://www.genome.jp/dbget-bin/www_bget?ko:K03353	B3DNN5	699	5.7e-72	Anaphase-promoting complex subunit 6 OS=Arabidopsis thaliana GN=APC6 PE=2 SV=1	PF13371//PF03728//PF13174//PF13414//PF01184//PF00515//PF13374//PF13176//PF13181	Tetratricopeptide repeat//Viral DNA-binding protein, zinc binding domain//Tetratricopeptide repeat//TPR repeat//GPR1/FUN34/yaaH family//Tetratricopeptide repeat//Tetratricopeptide repeat//Tetratricopeptide repeat//Tetratricopeptide repeat	GO:0006260	DNA replication	GO:0008270//GO:0005515//GO:0003677	zinc ion binding//protein binding//DNA binding	GO:0016021	integral component of membrane	KOG1173	Anaphase-promoting complex (APC), Cdc16 subunit
Cluster-31803.63871	122.826	1080.28	-3.1367	9.1e-08	5229	552843569	XP_005850872.1	926	4.2e-97	hypothetical protein CHLNCDRAFT_140515 [Chlorella variabilis]>gi|307110534|gb|EFN58770.1| hypothetical protein CHLNCDRAFT_140515 [Chlorella variabilis]	--	--	--	--	--	--	--	--	--	O23969	317	2.4e-27	Pollen-specific protein SF21 OS=Helianthus annuus GN=SF21 PE=2 SV=1	PF09618//PF00168	CRISPR-associated protein (Cas_Csy4)//C2 domain	GO:0043571	maintenance of CRISPR repeat elements	GO:0004519//GO:0005515	endonuclease activity//protein binding	--	--	--	--
Cluster-31803.45990	219.184	2475.28	-3.4974	9.14e-08	1969	--	--	--	--	--	--	--	--	--	--	--	--	--	--	--	--	--	--	--	--	--	--	--	--	--	--	--	--
Cluster-31803.89631	21.5156	382.858	-4.1534	1e-07	201	552832502	XP_005848360.1	271	1.4e-22	hypothetical protein CHLNCDRAFT_145099 [Chlorella variabilis]>gi|307108017|gb|EFN56258.1| hypothetical protein CHLNCDRAFT_145099 [Chlorella variabilis]	--	--	--	--	--	--	--	--	--	--	--	--	--	PF07562//PF00020//PF02443	Nine Cysteines Domain of family 3 GPCR//TNFR/NGFR cysteine-rich region//Circovirus capsid protein	GO:0007186//GO:0019069	G-protein coupled receptor signaling pathway//viral capsid assembly	GO:0004930//GO:0005515	G-protein coupled receptor activity//protein binding	GO:0042025	host cell nucleus	--	--
Cluster-31803.93091	576.845	40.884	3.8186	1e-07	1890	--	--	--	--	--	--	--	--	--	--	--	--	--	--	--	--	--	--	--	--	--	--	--	--	--	--	--	--
Cluster-31803.80027	65.549	859.722	-3.7132	1.05e-07	2863	552810930	XP_005843330.1	558	1.1e-54	hypothetical protein CHLNCDRAFT_141231 [Chlorella variabilis]>gi|307102963|gb|EFN51228.1| hypothetical protein CHLNCDRAFT_141231 [Chlorella variabilis]	--	--	--	--	--	K00472	E1.14.11.2	prolyl 4-hydroxylase	http://www.genome.jp/dbget-bin/www_bget?ko:K00472	Q9LN20	326	1.2e-28	Probable prolyl 4-hydroxylase 3 OS=Arabidopsis thaliana GN=P4H3 PE=2 SV=1	PF13640//PF03171	2OG-Fe(II) oxygenase superfamily//2OG-Fe(II) oxygenase superfamily	GO:0055114	oxidation-reduction process	GO:0016491//GO:0005506//GO:0031418//GO:0016706	oxidoreductase activity//iron ion binding//L-ascorbic acid binding//oxidoreductase activity, acting on paired donors, with incorporation or reduction of molecular oxygen, 2-oxoglutarate as one donor, and incorporation of one atom each of oxygen into both donors	--	--	--	--
Cluster-31803.98485	152.05	0	Inf	1.05e-07	1527	118546	P28998.1	1771	1.3e-195	RecName: Full=NADP-specific glutamate dehydrogenase; Short=NADP-GDH, partial [Chlorella sorokiniana]>gi|18273|emb|CAA41636.1| glutamate dehydrogenase (NADP+) [Chlorella sorokiniana]			599	0		K00262	E1.4.1.4, gdhA	glutamate dehydrogenase (NADP+)	http://www.genome.jp/dbget-bin/www_bget?ko:K00262	P28998	1771	1.8e-196	NADP-specific glutamate dehydrogenase (Fragment) OS=Chlorella sorokiniana PE=2 SV=1	PF00208//PF02812//PF13241	Glutamate/Leucine/Phenylalanine/Valine dehydrogenase//Glu/Leu/Phe/Val dehydrogenase, dimerisation domain//Putative NAD(P)-binding	GO:0019354//GO:0055114//GO:0006779//GO:0006520	siroheme biosynthetic process//oxidation-reduction process//porphyrin-containing compound biosynthetic process//cellular amino acid metabolic process	GO:0043115//GO:0016491	precorrin-2 dehydrogenase activity//oxidoreductase activity	--	--	KOG2250	Glutamate/leucine/phenylalanine/valine dehydrogenases
Cluster-31803.68449	197.26	1521.05	-2.9469	1.05e-07	1883	760437373	XP_011395755.1	290	8.5e-24	putative thiol methyltransferase 2 [Auxenochlorella protothecoides]>gi|675350449|gb|KFM22889.1| putative thiol methyltransferase 2 [Auxenochlorella protothecoides]	--	--	--	--	--	--	--	--	--	--	--	--	--	PF08241//PF05724	Methyltransferase domain//Thiopurine S-methyltransferase (TPMT)	GO:0008152	metabolic process	GO:0008168//GO:0008757	methyltransferase activity//S-adenosylmethionine-dependent methyltransferase activity	--	--	--	--
Cluster-31803.57573	0	122.684	#NAME?	1.08e-07	6959	760446815	XP_011400476.1	1017	1.6e-107	hypothetical protein F751_6080 [Auxenochlorella protothecoides]>gi|675355059|gb|KFM27499.1| hypothetical protein F751_6080 [Auxenochlorella protothecoides]	--	--	--	--	--	--	--	--	--	Q6MMS2	135	4.1e-06	Polyribonucleotide nucleotidyltransferase OS=Bdellovibrio bacteriovorus (strain ATCC 15356 / DSM 50701 / NCIB 9529 / HD100) GN=pnp PE=3 SV=1	PF13885//PF07819//PF07836//PF00899//PF01764//PF00336//PF00575//PF02668//PF09179//PF00975	Keratin, high sulfur B2 protein//PGAP1-like protein//DmpG-like communication domain//ThiF family//Lipase (class 3)//DNA polymerase (viral) C-terminal domain//S1 RNA binding domain//Taurine catabolism dioxygenase TauD, TfdA family//TilS substrate binding domain//Thioesterase domain	GO:0009058//GO:0055114//GO:0019439//GO:0051252//GO:0006629//GO:0008033//GO:0006505//GO:0006886	biosynthetic process//oxidation-reduction process//aromatic compound catabolic process//regulation of RNA metabolic process//lipid metabolic process//tRNA processing//GPI anchor metabolic process//intracellular protein transport	GO:0004523//GO:0003676//GO:0016788//GO:0000166//GO:0005524//GO:0008641//GO:0016491//GO:0016833//GO:0016879	RNA-DNA hybrid ribonuclease activity//nucleic acid binding//hydrolase activity, acting on ester bonds//nucleotide binding//ATP binding//small protein activating enzyme activity//oxidoreductase activity//oxo-acid-lyase activity//ligase activity, forming carbon-nitrogen bonds	GO:0005737//GO:0045095	cytoplasm//keratin filament	--	--
Cluster-31803.66609	226.522	3422.41	-3.9173	1.13e-07	3040	552842683	XP_005850634.1	430	8e-40	hypothetical protein CHLNCDRAFT_20098 [Chlorella variabilis]>gi|307110296|gb|EFN58532.1| hypothetical protein CHLNCDRAFT_20098 [Chlorella variabilis]	--	--	--	--	--	K15777	DOPA	4,5-DOPA dioxygenase extradiol	http://www.genome.jp/dbget-bin/www_bget?ko:K15777	B6F0W8	224	8.6e-17	4,5-DOPA dioxygenase extradiol OS=Mirabilis jalapa GN=DOD PE=1 SV=1	PF13994//PF02900	PgaD-like protein//Catalytic LigB subunit of aromatic ring-opening dioxygenase	GO:0008152//GO:0006725//GO:0042710	metabolic process//cellular aromatic compound metabolic process//biofilm formation	GO:0016491//GO:0008198//GO:0043169	oxidoreductase activity//ferrous iron binding//cation binding	--	--	--	--
Cluster-31803.75769	7.86743	253.655	-5.0108	1.13e-07	1471	552832495	XP_005848358.1	960	1.3e-101	hypothetical protein CHLNCDRAFT_57668 [Chlorella variabilis]>gi|307108015|gb|EFN56256.1| hypothetical protein CHLNCDRAFT_57668 [Chlorella variabilis]	--	--	--	--	--	--	--	--	--	--	--	--	--	PF01130	CD36 family	GO:0007155	cell adhesion	--	--	GO:0016020	membrane	--	--
Cluster-31803.103375	64.0772	695.764	-3.4407	1.16e-07	2810	--	--	--	--	--	--	--	--	--	--	--	--	--	--	--	--	--	--	PF05887	Procyclic acidic repetitive protein (PARP)	--	--	--	--	GO:0016020	membrane	--	--
Cluster-31803.44827	293.126	8.83738	5.0518	1.19e-07	1574	552839017	XP_005849701.1	390	1.8e-35	hypothetical protein CHLNCDRAFT_51171 [Chlorella variabilis]>gi|307109361|gb|EFN57599.1| hypothetical protein CHLNCDRAFT_51171 [Chlorella variabilis]	--	--	--	--	--	K04424	ZAK, MLTK	sterile alpha motif and leucine zipper containing kinase AZK	http://www.genome.jp/dbget-bin/www_bget?ko:K04424	Q2MHE4	195	1e-13	Serine/threonine-protein kinase HT1 OS=Arabidopsis thaliana GN=HT1 PE=1 SV=1	PF00069//PF07714	Protein kinase domain//Protein tyrosine kinase	GO:0006468	protein phosphorylation	GO:0004672//GO:0005524	protein kinase activity//ATP binding	--	--	--	--
Cluster-31803.63296	150.711	0	Inf	1.21e-07	6491	552842583	XP_005850606.1	2525	2e-282	hypothetical protein CHLNCDRAFT_140553 [Chlorella variabilis]>gi|307110268|gb|EFN58504.1| hypothetical protein CHLNCDRAFT_140553 [Chlorella variabilis]			774	0		--	--	--	--	B1AVH7	428	4.1e-40	TBC1 domain family member 2A OS=Mus musculus GN=Tbc1d2 PE=2 SV=1	PF03206//PF10408//PF07228//PF03357//PF05531//PF07820	Nitrogen fixation protein NifW//Ubiquitin elongating factor core//Stage II sporulation protein E (SpoIIE)//Snf7//Nucleopolyhedrovirus P10 protein//TraC-like protein	GO:0006511//GO:0009399//GO:0000746//GO:0016567//GO:0044267//GO:0007034	ubiquitin-dependent protein catabolic process//nitrogen fixation//conjugation//protein ubiquitination//cellular protein metabolic process//vacuolar transport	GO:0003824//GO:0034450//GO:0016881	catalytic activity//ubiquitin-ubiquitin ligase activity//acid-amino acid ligase activity	GO:0019028//GO:0000151	viral capsid//ubiquitin ligase complex	KOG2058	Ypt/Rab GTPase activating protein
Cluster-31803.54712	258.093	1833.98	-2.829	1.29e-07	1969	760446091	XP_011400114.1	1349	1.4e-146	6-phosphogluconate dehydrogenase, decarboxylating [Auxenochlorella protothecoides]>gi|675354707|gb|KFM27147.1| 6-phosphogluconate dehydrogenase, decarboxylating [Auxenochlorella protothecoides]			214	1.55e-105		K00033	PGD, gnd, gntZ	6-phosphogluconate dehydrogenase	http://www.genome.jp/dbget-bin/www_bget?ko:K00033	Q94KU2	1260	4.1e-137	6-phosphogluconate dehydrogenase, decarboxylating 2, chloroplastic OS=Spinacia oleracea GN=pgdP PE=1 SV=1	PF02826//PF02737//PF02558//PF00393//PF03446	D-isomer specific 2-hydroxyacid dehydrogenase, NAD binding domain//3-hydroxyacyl-CoA dehydrogenase, NAD binding domain//Ketopantoate reductase PanE/ApbA//6-phosphogluconate dehydrogenase, C-terminal domain//NAD binding domain of 6-phosphogluconate dehydrogenase	GO:0018874//GO:0006550//GO:0006098//GO:0055114//GO:0006554//GO:0006574//GO:0015940//GO:0006631//GO:0006633//GO:0006568//GO:0006552//GO:0019521	benzoate metabolic process//isoleucine catabolic process//pentose-phosphate shunt//oxidation-reduction process//lysine catabolic process//valine catabolic process//pantothenate biosynthetic process//fatty acid metabolic process//fatty acid biosynthetic process//tryptophan metabolic process//leucine catabolic process//D-gluconate metabolic process	GO:0004616//GO:0008677//GO:0003857//GO:0051287//GO:0050661//GO:0016491	phosphogluconate dehydrogenase (decarboxylating) activity//2-dehydropantoate 2-reductase activity//3-hydroxyacyl-CoA dehydrogenase activity//NAD binding//NADP binding//oxidoreductase activity	--	--	KOG2653	6-phosphogluconate dehydrogenase
Cluster-31803.82685	90.7418	856.104	-3.2379	1.32e-07	3698	552831344	XP_005848112.1	806	2.4e-83	hypothetical protein CHLNCDRAFT_59667 [Chlorella variabilis]>gi|307107768|gb|EFN56010.1| hypothetical protein CHLNCDRAFT_59667 [Chlorella variabilis]	--	--	--	--	--	--	--	--	--	P77475	300	1.6e-25	Fructose-1-phosphate phosphatase YqaB OS=Escherichia coli (strain K12) GN=yqaB PE=1 SV=1	PF05180	DNL zinc finger	--	--	GO:0016787//GO:0008270	hydrolase activity//zinc ion binding	--	--	KOG2914	Predicted haloacid-halidohydrolase and related hydrolases
Cluster-31803.73345	699.076	8012.86	-3.5188	1.33e-07	4219	552840890	XP_005850169.1	1443	3.8e-157	hypothetical protein CHLNCDRAFT_56043 [Chlorella variabilis]>gi|307109830|gb|EFN58067.1| hypothetical protein CHLNCDRAFT_56043 [Chlorella variabilis]			500	0		K19073	DVR	divinyl chlorophyllide a 8-vinyl-reductase	http://www.genome.jp/dbget-bin/www_bget?ko:K19073	J9RYI6	1149	6.6e-124	Divinyl chlorophyllide a 8-vinyl-reductase, chloroplastic OS=Cucumis sativus GN=DVR PE=1 SV=1	PF01073//PF01118//PF00106//PF02670//PF01113//PF01370	3-beta hydroxysteroid dehydrogenase/isomerase family//Semialdehyde dehydrogenase, NAD binding domain//short chain dehydrogenase//1-deoxy-D-xylulose 5-phosphate reductoisomerase//Dihydrodipicolinate reductase, N-terminus//NAD dependent epimerase/dehydratase family	GO:0009089//GO:0006694//GO:0008210//GO:0008209//GO:0008207//GO:0009085//GO:0055114//GO:0008152	lysine biosynthetic process via diaminopimelate//steroid biosynthetic process//estrogen metabolic process//androgen metabolic process//C21-steroid hormone metabolic process//lysine biosynthetic process//oxidation-reduction process//metabolic process	GO:0016491//GO:0016616//GO:0003824//GO:0000166//GO:0051287//GO:0016620//GO:0050662//GO:0003854//GO:0008839//GO:0070402	oxidoreductase activity//oxidoreductase activity, acting on the CH-OH group of donors, NAD or NADP as acceptor//catalytic activity//nucleotide binding//NAD binding//oxidoreductase activity, acting on the aldehyde or oxo group of donors, NAD or NADP as acceptor//coenzyme binding//3-beta-hydroxy-delta5-steroid dehydrogenase activity//4-hydroxy-tetrahydrodipicolinate reductase//NADPH binding	--	--	KOG1611	Predicted short chain-type dehydrogenase
Cluster-31803.86474	483.312	3075.98	-2.67	1.36e-07	4546	552836818	XP_005849232.1	1100	2.4e-117	hypothetical protein CHLNCDRAFT_21492 [Chlorella variabilis]>gi|307108891|gb|EFN57130.1| hypothetical protein CHLNCDRAFT_21492 [Chlorella variabilis]			60	1.46e-19		K06442	tlyA	23S rRNA (cytidine1920-2'-O)/16S rRNA (cytidine1409-2'-O)-methyltransferase	http://www.genome.jp/dbget-bin/www_bget?ko:K06442	P9WJ63	430	1.7e-40	16S/23S rRNA (cytidine-2'-O)-methyltransferase TlyA OS=Mycobacterium tuberculosis (strain ATCC 25618 / H37Rv) GN=tlyA PE=1 SV=1	PF08115//PF08241//PF01479//PF01728//PF00023//PF13606//PF09142//PF00737	SFI toxin family//Methyltransferase domain//S4 domain//FtsJ-like methyltransferase//Ankyrin repeat//Ankyrin repeat//tRNA Pseudouridine synthase II, C terminal//Photosystem II 10 kDa phosphoprotein	GO:0009405//GO:0050821//GO:0001522//GO:0015979//GO:0032259//GO:0008152//GO:0009451	pathogenesis//protein stabilization//pseudouridine synthesis//photosynthesis//methylation//metabolic process//RNA modification	GO:0042301//GO:0008168//GO:0003723//GO:0009982//GO:0005515	phosphate ion binding//methyltransferase activity//RNA binding//pseudouridine synthase activity//protein binding	GO:0005576//GO:0009523//GO:0016020	extracellular region//photosystem II//membrane	--	--
Cluster-31803.55851	20.0268	364.894	-4.1875	1.38e-07	2107	761974851	KIZ04888.1	177	1.2e-10	hypothetical protein MNEG_3071 [Monoraphidium neglectum]	--	--	--	--	--	--	--	--	--	--	--	--	--	PF05724	Thiopurine S-methyltransferase (TPMT)	--	--	GO:0008757	S-adenosylmethionine-dependent methyltransferase activity	--	--	--	--
Cluster-31803.49916	2616.17	14859.8	-2.5059	1.39e-07	2189	552838007	XP_005849486.1	1668	1.6e-183	hypothetical protein CHLNCDRAFT_142788 [Chlorella variabilis]>gi|307109146|gb|EFN57384.1| hypothetical protein CHLNCDRAFT_142788 [Chlorella variabilis]			351	0		--	--	--	--	A6Q4R8	136	9.9e-07	GTPase Der OS=Nitratiruptor sp. (strain SB155-2) GN=der PE=3 SV=1	PF02421//PF08926//PF01926//PF00071	Ferrous iron transport protein B//Domain of unknown function (DUF1908)//50S ribosome-binding GTPase//Ras family	GO:0016310//GO:0015684//GO:0009069//GO:0006468//GO:0007264	phosphorylation//ferrous iron transport//serine family amino acid metabolic process//protein phosphorylation//small GTPase mediated signal transduction	GO:0004674//GO:0015093//GO:0005488//GO:0005524//GO:0000287//GO:0005525	protein serine/threonine kinase activity//ferrous iron transmembrane transporter activity//binding//ATP binding//magnesium ion binding//GTP binding	GO:0016021	integral component of membrane	KOG1191	Mitochondrial GTPase
Cluster-31803.42276	403.289	3131.33	-2.9569	1.41e-07	4105	552810423	XP_005843200.1	878	1.2e-91	hypothetical protein CHLNCDRAFT_141423 [Chlorella variabilis]>gi|307102831|gb|EFN51098.1| hypothetical protein CHLNCDRAFT_141423 [Chlorella variabilis]			128	2.09e-57		K00326	E1.6.2.2	cytochrome-b5 reductase	http://www.genome.jp/dbget-bin/www_bget?ko:K00326	Q9ZNT1	685	4.1e-70	NADH--cytochrome b5 reductase 1 OS=Arabidopsis thaliana GN=CBR1 PE=1 SV=1	PF08030//PF00148//PF00175//PF00106//PF13241	Ferric reductase NAD binding domain//Nitrogenase component 1 type Oxidoreductase//Oxidoreductase NAD-binding domain//short chain dehydrogenase//Putative NAD(P)-binding	GO:0055114//GO:0006779//GO:0019354//GO:0008152	oxidation-reduction process//porphyrin-containing compound biosynthetic process//siroheme biosynthetic process//metabolic process	GO:0016491//GO:0043115	oxidoreductase activity//precorrin-2 dehydrogenase activity	--	--	KOG0534	NADH-cytochrome b-5 reductase
Cluster-31803.30004	148.876	0	Inf	1.49e-07	6616	552842769	XP_005850656.1	787	7e-81	hypothetical protein CHLNCDRAFT_140677 [Chlorella variabilis]>gi|307110318|gb|EFN58554.1| hypothetical protein CHLNCDRAFT_140677 [Chlorella variabilis]	--	--	--	--	--	K04460	PPP5C	serine/threonine-protein phosphatase 5	http://www.genome.jp/dbget-bin/www_bget?ko:K04460	Q9FN02	463	3.6e-44	Serine/threonine-protein phosphatase 7 OS=Arabidopsis thaliana GN=PP7 PE=1 SV=1	PF05773//PF00149//PF08493	RWD domain//Calcineurin-like phosphoesterase//Aflatoxin regulatory protein	GO:0045122//GO:0006355	aflatoxin biosynthetic process//regulation of transcription, DNA-templated	GO:0003677//GO:0016787//GO:0005515	DNA binding//hydrolase activity//protein binding	GO:0005634	nucleus	KOG0376	Serine-threonine phosphatase 2A, catalytic subunit
Cluster-31803.30317	364.545	21.0952	4.1111	1.5e-07	1957	552811228	XP_005843411.1	741	4.4e-76	hypothetical protein CHLNCDRAFT_141268 [Chlorella variabilis]>gi|307103044|gb|EFN51309.1| hypothetical protein CHLNCDRAFT_141268 [Chlorella variabilis]			180	1.22e-86		--	--	--	--	Q1QZX2	164	5e-10	Regulatory protein RecX OS=Chromohalobacter salexigens (strain DSM 3043 / ATCC BAA-138 / NCIMB 13768) GN=recX PE=3 SV=1	PF04625//PF05130//PF02631//PF08997	DEC-1 protein, N-terminal region//FlgN protein//RecX family//Ubiquinol-cytochrome C reductase complex, 6.4kD protein	GO:0006119//GO:0006118//GO:0044780//GO:0015992//GO:0007304//GO:0006282	oxidative phosphorylation//obsolete electron transport//bacterial-type flagellum assembly//proton transport//chorion-containing eggshell formation//regulation of DNA repair	GO:0008121//GO:0009055//GO:0005213	ubiquinol-cytochrome-c reductase activity//electron carrier activity//structural constituent of chorion	GO:0005576//GO:0042600	extracellular region//chorion	--	--
Cluster-31803.60416	4588.66	26333.6	-2.5208	1.51e-07	2164	--	--	--	--	--	--	--	--	--	--	--	--	--	--	--	--	--	--	PF08241//PF01209	Methyltransferase domain//ubiE/COQ5 methyltransferase family	GO:0008152	metabolic process	GO:0008168	methyltransferase activity	--	--	--	--
Cluster-31803.10474	413.621	24.7552	4.0625	1.54e-07	759	--	--	--	--	--	--	--	--	--	--	--	--	--	--	--	--	--	--	--	--	--	--	--	--	--	--	--	--
Cluster-31803.50470	1391.15	11969.6	-3.105	1.63e-07	234	552807807	XP_005842687.1	157	2.7e-09	hypothetical protein CHLNCDRAFT_17735, partial [Chlorella variabilis]>gi|307102181|gb|EFN50555.1| hypothetical protein CHLNCDRAFT_17735, partial [Chlorella variabilis]	--	--	--	--	--	--	--	--	--	--	--	--	--	PF01907//PF00020//PF07562//PF07354	Ribosomal protein L37e//TNFR/NGFR cysteine-rich region//Nine Cysteines Domain of family 3 GPCR//Zona-pellucida-binding protein (Sp38)	GO:0007186//GO:0042254//GO:0006412//GO:0007339	G-protein coupled receptor signaling pathway//ribosome biogenesis//translation//binding of sperm to zona pellucida	GO:0005515//GO:0004930//GO:0003735	protein binding//G-protein coupled receptor activity//structural constituent of ribosome	GO:0005622//GO:0005576//GO:0005840	intracellular//extracellular region//ribosome	--	--
Cluster-31803.39804	231.683	0	Inf	1.76e-07	2333	552835601	XP_005849006.1	557	1.1e-54	hypothetical protein CHLNCDRAFT_144580 [Chlorella variabilis]>gi|307108664|gb|EFN56904.1| hypothetical protein CHLNCDRAFT_144580 [Chlorella variabilis]			154	4.15e-72		--	--	--	--	--	--	--	--	PF00951	Arterivirus GL envelope glycoprotein	--	--	--	--	GO:0019031	viral envelope	--	--
Cluster-31803.103352	38.3955	713.461	-4.2158	1.84e-07	1321	552838743	XP_005849643.1	177	7.5e-11	hypothetical protein CHLNCDRAFT_143169 [Chlorella variabilis]>gi|307109303|gb|EFN57541.1| hypothetical protein CHLNCDRAFT_143169 [Chlorella variabilis]	--	--	--	--	--	--	--	--	--	--	--	--	--	--	--	--	--	--	--	--	--	--	--
Cluster-31803.84557	228.463	0	Inf	1.85e-07	5381	552841168	XP_005850234.1	488	2.7e-46	hypothetical protein CHLNCDRAFT_14837, partial [Chlorella variabilis]>gi|307109895|gb|EFN58132.1| hypothetical protein CHLNCDRAFT_14837, partial [Chlorella variabilis]			141	1.63e-64		K04794	PTH2	peptidyl-tRNA hydrolase, PTH2 family	http://www.genome.jp/dbget-bin/www_bget?ko:K04794	Q3ZBL5	312	9.5e-27	Peptidyl-tRNA hydrolase 2, mitochondrial OS=Bos taurus GN=PTRH2 PE=2 SV=1	PF12619//PF01660//PF08559//PF01981	Mini-chromosome maintenance protein 2//Viral methyltransferase//Cut8, nuclear proteasome tether protein//Peptidyl-tRNA hydrolase PTH2	GO:0071630//GO:0009451//GO:0006396//GO:0031144//GO:0080009//GO:0006270	nucleus-associated proteasomal ubiquitin-dependent protein catabolic process//RNA modification//RNA processing//proteasome localization//mRNA methylation//DNA replication initiation	GO:0004045//GO:0008174//GO:0003678//GO:0003723//GO:0003677//GO:0005524	aminoacyl-tRNA hydrolase activity//mRNA methyltransferase activity//DNA helicase activity//RNA binding//DNA binding//ATP binding	GO:0005634//GO:0005657//GO:0042555	nucleus//replication fork//MCM complex	KOG3282	Uncharacterized conserved protein
Cluster-31803.91130	199.717	2.35663	6.4051	1.88e-07	979	552816230	XP_005844635.1	514	4.7e-50	hypothetical protein CHLNCDRAFT_49097 [Chlorella variabilis]>gi|307104278|gb|EFN52533.1| hypothetical protein CHLNCDRAFT_49097 [Chlorella variabilis]			216	5.84e-107		K01358	clpP, CLPP	ATP-dependent Clp protease, protease subunit	http://www.genome.jp/dbget-bin/www_bget?ko:K01358	Q1Q8J2	291	4.7e-25	ATP-dependent Clp protease proteolytic subunit OS=Psychrobacter cryohalolentis (strain K5) GN=clpP PE=3 SV=2	PF15685	Gametogenetin	GO:0006508//GO:0006302//GO:0007276	proteolysis//double-strand break repair//gamete generation	GO:0004252	serine-type endopeptidase activity	--	--	KOG0840	ATP-dependent Clp protease, proteolytic subunit
Cluster-31803.43812	0	119.777	#NAME?	1.91e-07	5386	552809517	XP_005842959.1	335	1.5e-28	hypothetical protein CHLNCDRAFT_55527 [Chlorella variabilis]>gi|307102586|gb|EFN50857.1| hypothetical protein CHLNCDRAFT_55527 [Chlorella variabilis]	--	--	--	--	--	--	--	--	--	--	--	--	--	PF04615//PF09402//PF06305	Utp14 protein//Man1-Src1p-C-terminal domain//Protein of unknown function (DUF1049)	GO:0006364	rRNA processing	--	--	GO:0005639//GO:0032040//GO:0005887	integral component of nuclear inner membrane//small-subunit processome//integral component of plasma membrane	--	--
Cluster-31803.103161	14.706	310.225	-4.3988	2.02e-07	2003	552820579	XP_005845634.1	152	9.1e-08	hypothetical protein CHLNCDRAFT_136637 [Chlorella variabilis]>gi|307105282|gb|EFN53532.1| hypothetical protein CHLNCDRAFT_136637 [Chlorella variabilis]	--	--	--	--	--	--	--	--	--	--	--	--	--	--	--	--	--	--	--	--	--	--	--
Cluster-31803.45576	857.025	5139.29	-2.5842	2.08e-07	516	552848230	XP_005852057.1	691	7.3e-71	hypothetical protein CHLNCDRAFT_133041 [Chlorella variabilis]>gi|307111721|gb|EFN59955.1| hypothetical protein CHLNCDRAFT_133041 [Chlorella variabilis]	--	--	--	--	--	--	--	--	--	Q6GLK2	173	1.2e-11	Acyl-coenzyme A thioesterase THEM4 OS=Xenopus laevis GN=them4 PE=2 SV=2	PF02861//PF02165	Clp amino terminal domain, pathogenicity island component//Wilm's tumour protein	GO:0019538//GO:0006355	protein metabolic process//regulation of transcription, DNA-templated	--	--	GO:0005634	nucleus	--	--
Cluster-31803.41087	507.147	0	Inf	2.13e-07	3733	552807837	XP_005842691.1	886	1.3e-92	hypothetical protein CHLNCDRAFT_136591 [Chlorella variabilis]>gi|307102188|gb|EFN50559.1| hypothetical protein CHLNCDRAFT_136591 [Chlorella variabilis]			126	2.45e-56		K13989	DERL2_3	Derlin-2/3	http://www.genome.jp/dbget-bin/www_bget?ko:K13989	Q4G2J6	382	5.1e-35	Derlin-1.1 OS=Zea mays GN=DER1.1 PE=2 SV=2	PF12937//PF01428//PF00998	F-box-like//AN1-like Zinc finger//Viral RNA dependent RNA polymerase	GO:0006144//GO:0039694	purine nucleobase metabolic process//viral RNA genome replication	GO:0003723//GO:0008270//GO:0003968//GO:0005515	RNA binding//zinc ion binding//RNA-directed RNA polymerase activity//protein binding	GO:0031379	RNA-directed RNA polymerase complex	KOG0858	Predicted membrane protein
Cluster-31803.25968	199.283	1489.6	-2.902	2.23e-07	392	--	--	--	--	--	--	--	--	--	--	--	--	--	--	--	--	--	--	--	--	--	--	--	--	--	--	--	--
Cluster-31803.105046	0.35585	130.875	-8.5227	2.34e-07	822	--	--	--	--	--	--	--	--	--	--	--	--	--	--	--	--	--	--	--	--	--	--	--	--	--	--	--	--
Cluster-31803.72579	795.942	86.4843	3.2022	2.36e-07	808	552823840	XP_005846458.1	916	9.3e-97	hypothetical protein CHLNCDRAFT_135626 [Chlorella variabilis]>gi|307106109|gb|EFN54356.1| hypothetical protein CHLNCDRAFT_135626 [Chlorella variabilis]			300	9.64e-154		K13207	CUGBP, BRUNOL, CELF	CUG-BP- and ETR3-like factor	http://www.genome.jp/dbget-bin/www_bget?ko:K13207	Q7ZXE2	310	2.4e-27	CUGBP Elav-like family member 2 OS=Xenopus laevis GN=celf2 PE=1 SV=1	PF16367//PF08675//PF00076	RNA recognition motif//RNA binding domain//RNA recognition motif. (a.k.a. RRM, RBD, or RNP domain)	GO:0051252//GO:0006402	regulation of RNA metabolic process//mRNA catabolic process	GO:0003676//GO:0046872//GO:0004535//GO:0003723//GO:0000166	nucleic acid binding//metal ion binding//poly(A)-specific ribonuclease activity//RNA binding//nucleotide binding	GO:0005634//GO:0005737	nucleus//cytoplasm	KOG0144	RNA-binding protein CUGBP1/BRUNO (RRM superfamily)
Cluster-31803.78177	45.6093	544.922	-3.5787	2.36e-07	455	--	--	--	--	--	--	--	--	--	--	--	--	--	--	--	--	--	--	PF02117	Serpentine type 7TM GPCR chemoreceptor Sra	GO:0007606//GO:0007186	sensory perception of chemical stimulus//G-protein coupled receptor signaling pathway	GO:0004930	G-protein coupled receptor activity	GO:0016021	integral component of membrane	--	--
Cluster-31803.100458	144.814	0	Inf	2.36e-07	2688	552840696	XP_005850117.1	622	3.8e-62	hypothetical protein CHLNCDRAFT_34403 [Chlorella variabilis]>gi|307109778|gb|EFN58015.1| hypothetical protein CHLNCDRAFT_34403 [Chlorella variabilis]			239	2.69e-119		K15283	SLC35E1	solute carrier family 35, member E1	http://www.genome.jp/dbget-bin/www_bget?ko:K15283	Q84QU8	511	4e-50	Phosphoenolpyruvate/phosphate translocator 2, chloroplastic OS=Oryza sativa subsp. japonica GN=PPT2 PE=2 SV=1	PF01552//PF08449//PF00892	Picornavirus 2B protein//UAA transporter family//EamA-like transporter family	GO:0055085//GO:0018144//GO:0006144//GO:0006810//GO:0006508	transmembrane transport//RNA-protein covalent cross-linking//purine nucleobase metabolic process//transport//proteolysis	GO:0008233//GO:0016740//GO:0000166//GO:0016779//GO:0008234//GO:0003968//GO:0016787//GO:0005198//GO:0005215	peptidase activity//transferase activity//nucleotide binding//nucleotidyltransferase activity//cysteine-type peptidase activity//RNA-directed RNA polymerase activity//hydrolase activity//structural molecule activity//transporter activity	GO:0031379//GO:0016021//GO:0019012//GO:0016020	RNA-directed RNA polymerase complex//integral component of membrane//virion//membrane	KOG1441	Glucose-6-phosphate/phosphate and phosphoenolpyruvate/phosphate antiporter
Cluster-31803.47498	1367.18	7884.79	-2.5279	2.37e-07	359	552832949	XP_005848446.1	169	1.7e-10	hypothetical protein CHLNCDRAFT_144815 [Chlorella variabilis]>gi|307108103|gb|EFN56344.1| hypothetical protein CHLNCDRAFT_144815 [Chlorella variabilis]	--	--	--	--	--	--	--	--	--	--	--	--	--	PF08278//PF07714//PF00069	DNA primase DnaG DnaB-binding//Protein tyrosine kinase//Protein kinase domain	GO:0006468//GO:0006351//GO:0006269	protein phosphorylation//transcription, DNA-templated//DNA replication, synthesis of RNA primer	GO:0003896//GO:0004672//GO:0005524	DNA primase activity//protein kinase activity//ATP binding	GO:0005657//GO:0005730	replication fork//nucleolus	--	--
Cluster-31803.36206	144.749	0	Inf	2.38e-07	3222	552845721	XP_005851428.1	898	4.6e-94	hypothetical protein CHLNCDRAFT_17231, partial [Chlorella variabilis]>gi|307111091|gb|EFN59326.1| hypothetical protein CHLNCDRAFT_17231, partial [Chlorella variabilis]			41	3.77e-09		K06889	K06889	uncharacterized protein	http://www.genome.jp/dbget-bin/www_bget?ko:K06889	P54069	411	1.9e-38	Protein bem46 OS=Schizosaccharomyces pombe (strain 972 / ATCC 24843) GN=bem46 PE=2 SV=3	PF07859//PF03153//PF09606//PF00326//PF01080//PF07819//PF02862//PF10232//PF00975//PF05929//PF04690//PF01764//PF03583//PF02230	alpha/beta hydrolase fold//Transcription factor IIA, alpha/beta subunit//ARC105 or Med15 subunit of Mediator complex non-fungal//Prolyl oligopeptidase family//Presenilin//PGAP1-like protein//DDHD domain//Mediator of RNA polymerase II transcription complex subunit 8//Thioesterase domain//Phage capsid scaffolding protein (GPO) serine peptidase//YABBY protein//Lipase (class 3)//Secretory lipase//Pho…	GO:0006367//GO:0046486//GO:0008152//GO:0006357//GO:0019069//GO:0009058//GO:0006508//GO:0006629//GO:0007275//GO:0006505//GO:0006886//GO:0016042	transcription initiation from RNA polymerase II promoter//glycerolipid metabolic process//metabolic process//regulation of transcription from RNA polymerase II promoter//viral capsid assembly//biosynthetic process//proteolysis//lipid metabolic process//multicellular organismal development//GPI anchor metabolic process//intracellular protein transport//lipid catabolic process	GO:0046872//GO:0001104//GO:0016787//GO:0016788//GO:0004190//GO:0008236//GO:0004806	metal ion binding//RNA polymerase II transcription cofactor activity//hydrolase activity//hydrolase activity, acting on ester bonds//aspartic-type endopeptidase activity//serine-type peptidase activity//triglyceride lipase activity	GO:0016021//GO:0005672//GO:0016592	integral component of membrane//transcription factor TFIIA complex//mediator complex	KOG4391	Predicted alpha/beta hydrolase BEM46
Cluster-31803.98074	325.048	13.9469	4.5426	2.38e-07	4853	193870818	ACF22999.1	2466	1e-275	nitrate reductase [Chlorella vulgaris]			796	0		K10534	NR	nitrate reductase (NAD(P)H)	http://www.genome.jp/dbget-bin/www_bget?ko:K10534	P36841	1779	6.7e-197	Nitrate reductase [NADH] OS=Volvox carteri GN=NITA PE=2 SV=1	PF03460//PF01077//PF00174//PF03404	Nitrite/Sulfite reductase ferredoxin-like half domain//Nitrite and sulphite reductase 4Fe-4S domain//Oxidoreductase molybdopterin binding domain//Mo-co oxidoreductase dimerisation domain	GO:0055114//GO:0042128	oxidation-reduction process//nitrate assimilation	GO:0016491//GO:0020037//GO:0030151//GO:0051536	oxidoreductase activity//heme binding//molybdenum ion binding//iron-sulfur cluster binding	--	--	KOG0535	Sulfite oxidase, molybdopterin-binding component
Cluster-31803.46046	137.426	1105.59	-3.0081	2.38e-07	513	--	--	--	--	--	--	--	--	--	--	--	--	--	--	--	--	--	--	PF01607	Chitin binding Peritrophin-A domain	GO:0006030	chitin metabolic process	GO:0008061	chitin binding	GO:0005576	extracellular region	--	--
Cluster-31803.66021	13897	76565.8	-2.4619	2.38e-07	2577	552832502	XP_005848360.1	326	7.8e-28	hypothetical protein CHLNCDRAFT_145099 [Chlorella variabilis]>gi|307108017|gb|EFN56258.1| hypothetical protein CHLNCDRAFT_145099 [Chlorella variabilis]	--	--	--	--	--	--	--	--	--	--	--	--	--	PF07562//PF00020	Nine Cysteines Domain of family 3 GPCR//TNFR/NGFR cysteine-rich region	GO:0007186	G-protein coupled receptor signaling pathway	GO:0005515//GO:0004930	protein binding//G-protein coupled receptor activity	--	--	--	--
Cluster-31803.71802	689.073	4196.33	-2.6064	2.49e-07	1757	552818908	XP_005845302.1	661	7.5e-67	hypothetical protein CHLNCDRAFT_137035 [Chlorella variabilis]>gi|307104949|gb|EFN53200.1| hypothetical protein CHLNCDRAFT_137035 [Chlorella variabilis]	--	--	--	--	--	K01762	ACS	1-aminocyclopropane-1-carboxylate synthase	http://www.genome.jp/dbget-bin/www_bget?ko:K01762	Q9T065	341	1.3e-30	1-aminocyclopropane-1-carboxylate synthase 8 OS=Arabidopsis thaliana GN=ACS8 PE=1 SV=1	PF16839//PF00155//PF05130	Nematode antimicrobial peptide//Aminotransferase class I and II//FlgN protein	GO:0098542//GO:0009058//GO:0044780	defense response to other organism//biosynthetic process//bacterial-type flagellum assembly	GO:0003824//GO:0030170	catalytic activity//pyridoxal phosphate binding	--	--	--	--
Cluster-31803.85777	108.283	924.66	-3.0941	2.52e-07	260	--	--	--	--	--			34	2.09e-06		--	--	--	--	--	--	--	--	--	--	--	--	--	--	--	--	--	--
Cluster-31803.96976	125.095	1015.07	-3.0205	2.52e-07	4719	552839030	XP_005849703.1	2518	9.5e-282	hypothetical protein CHLNCDRAFT_30507, partial [Chlorella variabilis]>gi|307109363|gb|EFN57601.1| hypothetical protein CHLNCDRAFT_30507, partial [Chlorella variabilis]			839	0		--	--	--	--	Q9LDK9	1270	6.9e-138	Beta-adaptin-like protein A OS=Arabidopsis thaliana GN=BETAA-AD PE=1 SV=1	PF06156//PF04799//PF13851//PF06160//PF06009//PF04111//PF07926//PF01544//PF06810//PF16331//PF09726//PF10186//PF14073//PF01920//PF11365//PF08650//PF04871//PF09066//PF07851//PF02985//PF16326//PF01602//PF10473	Protein of unknown function (DUF972)//fzo-like conserved region//Growth-arrest specific micro-tubule binding//Septation ring formation regulator, EzrA//Laminin Domain II//Autophagy protein Apg6//TPR/MLP1/MLP2-like protein//CorA-like Mg2+ transporter protein//Phage minor structural protein GP20//TolA binding protein trimerisation//Transmembrane protein//Vacuolar sorting 38 and autophagy-related su…	GO:0015031//GO:0006260//GO:0006457//GO:0006914//GO:0070206//GO:0016192//GO:0048870//GO:0010506//GO:0006606//GO:0008608//GO:0007155//GO:0006886//GO:0008053//GO:0000921//GO:0055085//GO:0010508//GO:0030001	protein transport//DNA replication//protein folding//autophagy//protein trimerization//vesicle-mediated transport//cell motility//regulation of autophagy//protein import into nucleus//attachment of spindle microtubules to kinetochore//cell adhesion//intracellular protein transport//mitochondrial fusion//septin ring assembly//transmembrane transport//positive regulation of autophagy//metal ion tra…	GO:0008565//GO:0042802//GO:0043015//GO:0042803//GO:0003924//GO:0008134//GO:0005515//GO:0005198//GO:0046873//GO:0045502//GO:0051082//GO:0003677	protein transporter activity//identical protein binding//gamma-tubulin binding//protein homodimerization activity//GTPase activity//transcription factor binding//protein binding//structural molecule activity//metal ion transmembrane transporter activity//dynein binding//unfolded protein binding//DNA binding	GO:0072686//GO:0016020//GO:0005737//GO:0045298//GO:0005741//GO:0005615//GO:0031514//GO:0016272//GO:0016021//GO:0030117//GO:0005940//GO:0030131//GO:0030286//GO:0005667//GO:0042729	mitotic spindle//membrane//cytoplasm//tubulin complex//mitochondrial outer membrane//extracellular space//motile cilium//prefoldin complex//integral component of membrane//membrane coat//septin ring//clathrin adaptor complex//dynein complex//transcription factor complex//DASH complex	KOG1061	Vesicle coat complex AP-1/AP-2/AP-4, beta subunit
Cluster-31803.86359	401.392	2589.32	-2.6895	2.55e-07	715	--	--	--	--	--	--	--	--	--	--	--	--	--	--	--	--	--	--	PF04513//PF03367	Baculovirus polyhedron envelope protein, PEP, C terminus//ZPR1 zinc-finger domain	--	--	GO:0005198//GO:0008270	structural molecule activity//zinc ion binding	GO:0019031//GO:0019028	viral envelope//viral capsid	--	--
Cluster-31803.95708	424.926	2713.66	-2.675	2.62e-07	2222	--	--	--	--	--			59	2.55e-19		--	--	--	--	P69245	128	8.5e-06	Histone H3.3 OS=Lolium temulentum PE=2 SV=2	PF02694	Uncharacterised BCR, YnfA/UPF0060 family	--	--	--	--	GO:0016020	membrane	KOG1745	Histones H3 and H4
Cluster-31803.57594	422.559	1.5068	8.1315	2.78e-07	1379	552837565	XP_005849396.1	1025	3.7e-109	hypothetical protein CHLNCDRAFT_143895 [Chlorella variabilis]>gi|307109055|gb|EFN57294.1| hypothetical protein CHLNCDRAFT_143895 [Chlorella variabilis]			473	0		--	--	--	--	F4J738	539	1.2e-53	Importin beta-like SAD2 homolog OS=Arabidopsis thaliana GN=At3g59020 PE=1 SV=1	PF01623//PF04931//PF03554	Carlavirus putative nucleic acid binding protein//DNA polymerase phi//UL73 viral envelope glycoprotein	GO:0006351//GO:0006260//GO:0006355	transcription, DNA-templated//DNA replication//regulation of transcription, DNA-templated	GO:0003887//GO:0003677//GO:0003676	DNA-directed DNA polymerase activity//DNA binding//nucleic acid binding	GO:0019031//GO:0042575	viral envelope//DNA polymerase complex	KOG1991	Nuclear transport receptor RANBP7/RANBP8 (importin beta superfamily)
Cluster-31803.18732	27238.6	4796.73	2.5055	2.81e-07	4732	193870818	ACF22999.1	2466	1e-275	nitrate reductase [Chlorella vulgaris]			816	0		K10534	NR	nitrate reductase (NAD(P)H)	http://www.genome.jp/dbget-bin/www_bget?ko:K10534	P36841	1779	6.5e-197	Nitrate reductase [NADH] OS=Volvox carteri GN=NITA PE=2 SV=1	PF03460//PF03404//PF01077//PF00174	Nitrite/Sulfite reductase ferredoxin-like half domain//Mo-co oxidoreductase dimerisation domain//Nitrite and sulphite reductase 4Fe-4S domain//Oxidoreductase molybdopterin binding domain	GO:0042128//GO:0055114	nitrate assimilation//oxidation-reduction process	GO:0051536//GO:0030151//GO:0016491//GO:0020037	iron-sulfur cluster binding//molybdenum ion binding//oxidoreductase activity//heme binding	--	--	KOG0535	Sulfite oxidase, molybdopterin-binding component
Cluster-31803.31978	0.35585	324.711	-9.8337	2.85e-07	3132	552846181	XP_005851548.1	626	1.5e-62	hypothetical protein CHLNCDRAFT_29581 [Chlorella variabilis]>gi|307111211|gb|EFN59446.1| hypothetical protein CHLNCDRAFT_29581 [Chlorella variabilis]			57	4.67e-18		K14328	UPF3, RENT3	regulator of nonsense transcripts 3	http://www.genome.jp/dbget-bin/www_bget?ko:K14328	Q0W3X3	180	1.1e-11	Hydroxylamine reductase OS=Methanocella arvoryzae (strain DSM 22066 / NBRC 105507 / MRE50) GN=hcp PE=3 SV=1	PF03063	Prismane/CO dehydrogenase family	GO:0055114	oxidation-reduction process	GO:0016491	oxidoreductase activity	--	--	--	--
Cluster-31803.53428	4.28957	198.049	-5.5289	2.85e-07	1805	552823678	XP_005846415.1	154	4.8e-08	hypothetical protein CHLNCDRAFT_25068 [Chlorella variabilis]>gi|307106066|gb|EFN54313.1| hypothetical protein CHLNCDRAFT_25068 [Chlorella variabilis]	--	--	--	--	--	--	--	--	--	--	--	--	--	PF03982	Diacylglycerol acyltransferase	--	--	GO:0016747	transferase activity, transferring acyl groups other than amino-acyl groups	--	--	--	--
Cluster-31803.103162	26.161	397.819	-3.9266	2.9e-07	2000	--	--	--	--	--	--	--	--	--	--	--	--	--	--	--	--	--	--	PF01258	Prokaryotic dksA/traR C4-type zinc finger	--	--	GO:0008270	zinc ion binding	--	--	--	--
Cluster-31803.59162	1232.1	7239.68	-2.5548	2.93e-07	281	552832502	XP_005848360.1	241	6e-19	hypothetical protein CHLNCDRAFT_145099 [Chlorella variabilis]>gi|307108017|gb|EFN56258.1| hypothetical protein CHLNCDRAFT_145099 [Chlorella variabilis]	--	--	--	--	--	--	--	--	--	--	--	--	--	PF00020//PF01607//PF07562	TNFR/NGFR cysteine-rich region//Chitin binding Peritrophin-A domain//Nine Cysteines Domain of family 3 GPCR	GO:0006030//GO:0007186	chitin metabolic process//G-protein coupled receptor signaling pathway	GO:0005515//GO:0004930//GO:0008061	protein binding//G-protein coupled receptor activity//chitin binding	GO:0005576	extracellular region	--	--
Cluster-31803.38480	631.101	3823.24	-2.5989	3.07e-07	3766	552831523	XP_005848155.1	1292	1.1e-139	hypothetical protein CHLNCDRAFT_31039 [Chlorella variabilis]>gi|307107811|gb|EFN56053.1| hypothetical protein CHLNCDRAFT_31039 [Chlorella variabilis]			499	0		K15276	SLC35B2, PAPST1	solute carrier family 35 (adenosine 3'-phospho 5'-phosphosulfate transporter), member B2	http://www.genome.jp/dbget-bin/www_bget?ko:K15276	Q6NMB6	713	2.1e-73	UDP-galactose/UDP-glucose transporter 5B OS=Arabidopsis thaliana GN=At5g59740 PE=2 SV=1	PF00892//PF04142//PF08449	EamA-like transporter family//Nucleotide-sugar transporter//UAA transporter family	GO:0055085//GO:0008643	transmembrane transport//carbohydrate transport	GO:0005351	sugar:proton symporter activity	GO:0000139//GO:0016021//GO:0016020	Golgi membrane//integral component of membrane//membrane	KOG1581	UDP-galactose transporter related protein
Cluster-31803.65038	684.275	4070.13	-2.5724	3.15e-07	1156	--	--	--	--	--	--	--	--	--	--	--	--	--	--	--	--	--	--	--	--	--	--	--	--	--	--	--	--
Cluster-31803.75095	274.54	1832.11	-2.7384	3.15e-07	1251	545354010	XP_005642840.1	626	6.2e-63	kinase-like protein, partial [Coccomyxa subellipsoidea C-169]>gi|384244798|gb|EIE18296.1| kinase-like protein, partial [Coccomyxa subellipsoidea C-169]	--	--	--	--	--	K14510	CTR1	serine/threonine-protein kinase CTR1	http://www.genome.jp/dbget-bin/www_bget?ko:K14510	Q54H46	466	3.1e-45	Probable serine/threonine-protein kinase drkA OS=Dictyostelium discoideum GN=drkA PE=3 SV=1	PF00069//PF07714	Protein kinase domain//Protein tyrosine kinase	GO:0006468	protein phosphorylation	GO:0005524//GO:0004672//GO:0016301	ATP binding//protein kinase activity//kinase activity	--	--	--	--
Cluster-31803.56759	325.513	2188.08	-2.7489	3.21e-07	579	--	--	--	--	--	--	--	--	--	--	--	--	--	--	--	--	--	--	--	--	--	--	--	--	--	--	--	--
Cluster-31803.79448	142.057	0	Inf	3.23e-07	2398	545375709	XP_005652007.1	1014	1.2e-107	tRNA guanosine-2'-O-methyltransferase [Coccomyxa subellipsoidea C-169]>gi|384253989|gb|EIE27463.1| tRNA guanosine-2'-O-methyltransferase [Coccomyxa subellipsoidea C-169]	--	--	--	--	--	K15430	TRM11, TRMT11	tRNA (guanine10-N2)-methyltransferase	http://www.genome.jp/dbget-bin/www_bget?ko:K15430	Q6NS23	563	3.3e-56	tRNA (guanine(10)-N2)-methyltransferase homolog OS=Xenopus laevis GN=trmt11 PE=2 SV=1	PF01555//PF02384//PF01273//PF08241	DNA methylase//N-6 DNA Methylase//LBP / BPI / CETP family, N-terminal domain//Methyltransferase domain	GO:0006306//GO:0008152	DNA methylation//metabolic process	GO:0008289//GO:0008168//GO:0008170//GO:0003677	lipid binding//methyltransferase activity//N-methyltransferase activity//DNA binding	--	--	KOG2671	Putative RNA methylase
Cluster-31803.34924	2.49095	175.122	-6.1355	3.3e-07	1485	552815268	XP_005844401.1	331	1.2e-28	hypothetical protein CHLNCDRAFT_139059 [Chlorella variabilis]>gi|307104043|gb|EFN52299.1| hypothetical protein CHLNCDRAFT_139059 [Chlorella variabilis]	--	--	--	--	--	--	--	--	--	Q949P2	288	1.6e-24	Probable cytosolic oligopeptidase A OS=Arabidopsis thaliana GN=CYOP PE=1 SV=1	PF01432	Peptidase family M3	GO:0006508	proteolysis	GO:0004222	metalloendopeptidase activity	--	--	--	--
Cluster-31803.13013	418.347	2695.77	-2.6879	3.3e-07	546	--	--	--	--	--	--	--	--	--	--	--	--	--	--	--	--	--	--	--	--	--	--	--	--	--	--	--	--
Cluster-31803.34246	4.2702	246.11	-5.8489	3.35e-07	5410	552810873	XP_005843316.1	1800	2e-198	hypothetical protein CHLNCDRAFT_28225 [Chlorella variabilis]>gi|307102949|gb|EFN51214.1| hypothetical protein CHLNCDRAFT_28225 [Chlorella variabilis]			540	0		K00225	GLDH	L-galactono-1,4-lactone dehydrogenase	http://www.genome.jp/dbget-bin/www_bget?ko:K00225	Q9SU56	1208	1.2e-130	L-galactono-1,4-lactone dehydrogenase, mitochondrial OS=Arabidopsis thaliana GN=GLDH PE=1 SV=1	PF04030//PF16035//PF01565//PF16036//PF02431	D-arabinono-1,4-lactone oxidase//Chalcone isomerase like//FAD binding domain//Chalcone isomerase-like//Chalcone-flavanone isomerase	GO:0055114	oxidation-reduction process	GO:0016872//GO:0016899//GO:0016491//GO:0003885//GO:0050660	intramolecular lyase activity//oxidoreductase activity, acting on the CH-OH group of donors, oxygen as acceptor//oxidoreductase activity//D-arabinono-1,4-lactone oxidase activity//flavin adenine dinucleotide binding	GO:0016020	membrane	KOG4730	D-arabinono-1, 4-lactone oxidase
Cluster-31803.103668	260.107	1746.97	-2.7477	3.35e-07	1510	552805680	XP_005842550.1	198	3.2e-13	expressed protein, partial [Chlorella variabilis]>gi|307101786|gb|EFN50418.1| expressed protein, partial [Chlorella variabilis]	--	--	--	--	--	--	--	--	--	--	--	--	--	PF16839	Nematode antimicrobial peptide	GO:0098542	defense response to other organism	--	--	--	--	--	--
Cluster-31803.21917	17.5625	730.507	-5.3783	3.39e-07	1295	552826130	XP_005846961.1	305	1.1e-25	expressed protein [Chlorella variabilis]>gi|307106614|gb|EFN54859.1| expressed protein [Chlorella variabilis]	--	--	--	--	--	--	--	--	--	--	--	--	--	--	--	--	--	--	--	--	--	--	--
Cluster-31803.62760	477.142	4014.47	-3.0727	3.4e-07	468	--	--	--	--	--	--	--	--	--	--	--	--	--	--	--	--	--	--	--	--	--	--	--	--	--	--	--	--
Cluster-31803.59641	1505.68	8613.68	-2.5162	3.7e-07	847	552848230	XP_005852057.1	190	1.5e-12	hypothetical protein CHLNCDRAFT_133041 [Chlorella variabilis]>gi|307111721|gb|EFN59955.1| hypothetical protein CHLNCDRAFT_133041 [Chlorella variabilis]	--	--	--	--	--	--	--	--	--	--	--	--	--	--	--	--	--	--	--	--	--	--	--
Cluster-31803.47532	32.9512	443.602	-3.7509	3.72e-07	409	552846181	XP_005851548.1	166	4.4e-10	hypothetical protein CHLNCDRAFT_29581 [Chlorella variabilis]>gi|307111211|gb|EFN59446.1| hypothetical protein CHLNCDRAFT_29581 [Chlorella variabilis]	--	--	--	--	--	--	--	--	--	--	--	--	--	--	--	GO:0055114	oxidation-reduction process	GO:0051536//GO:0016661	iron-sulfur cluster binding//oxidoreductase activity, acting on other nitrogenous compounds as donors	GO:0005737	cytoplasm	--	--
Cluster-31803.96276	218.24	1564.2	-2.8414	3.81e-07	2427	552839646	XP_005849849.1	580	2.6e-57	hypothetical protein CHLNCDRAFT_51027 [Chlorella variabilis]>gi|307109509|gb|EFN57747.1| hypothetical protein CHLNCDRAFT_51027 [Chlorella variabilis]	--	--	--	--	--	--	--	--	--	--	--	--	--	PF07690//PF01522	Major Facilitator Superfamily//Polysaccharide deacetylase	GO:0006807//GO:0055085//GO:0005975	nitrogen compound metabolic process//transmembrane transport//carbohydrate metabolic process	GO:0016810	hydrolase activity, acting on carbon-nitrogen (but not peptide) bonds	GO:0016021	integral component of membrane	--	--
Cluster-31803.30852	14.4954	301.93	-4.3805	3.84e-07	1606	552829960	XP_005847812.1	354	2.7e-31	hypothetical protein CHLNCDRAFT_134006 [Chlorella variabilis]>gi|307107467|gb|EFN55710.1| hypothetical protein CHLNCDRAFT_134006 [Chlorella variabilis]			262	2.61e-132		--	--	--	--	--	--	--	--	--	--	--	--	--	--	--	--	--	--
Cluster-31803.75598	2633.23	431.233	2.6103	3.86e-07	2382	760445397	XP_011399767.1	2035	4.8e-226	Pyruvate kinase, cytosolic isozyme [Auxenochlorella protothecoides]>gi|675354379|gb|KFM26819.1| Pyruvate kinase, cytosolic isozyme [Auxenochlorella protothecoides]			746	0		K00873	PK, pyk	pyruvate kinase	http://www.genome.jp/dbget-bin/www_bget?ko:K00873	Q42806	1710	3.3e-189	Pyruvate kinase, cytosolic isozyme OS=Glycine max PE=2 SV=1	PF00224//PF03328//PF02165	Pyruvate kinase, barrel domain//HpcH/HpaI aldolase/citrate lyase family//Wilm's tumour protein	GO:0015976//GO:0006096//GO:0006355//GO:0006094//GO:0006144	carbon utilization//glycolytic process//regulation of transcription, DNA-templated//gluconeogenesis//purine nucleobase metabolic process	GO:0030955//GO:0004743//GO:0003824//GO:0000287	potassium ion binding//pyruvate kinase activity//catalytic activity//magnesium ion binding	GO:0005634	nucleus	--	--
Cluster-31803.103521	272.993	1848.31	-2.7593	3.95e-07	1545	552827748	XP_005847297.1	1137	4.2e-122	hypothetical protein CHLNCDRAFT_52565 [Chlorella variabilis]>gi|307106951|gb|EFN55195.1| hypothetical protein CHLNCDRAFT_52565 [Chlorella variabilis]			98	3.68e-41		K05894	OPR	12-oxophytodienoic acid reductase	http://www.genome.jp/dbget-bin/www_bget?ko:K05894	Q84QK0	1064	1.7e-114	12-oxophytodienoate reductase 1 OS=Oryza sativa subsp. japonica GN=OPR1 PE=2 SV=1	PF00724	NADH:flavin oxidoreductase / NADH oxidase family	GO:0055114	oxidation-reduction process	GO:0010181//GO:0016491	FMN binding//oxidoreductase activity	--	--	KOG0134	NADH:flavin oxidoreductase/12-oxophytodienoate reductase
Cluster-31803.26509	48.6159	548.179	-3.4951	4.05e-07	5535	552818604	XP_005845232.1	685	3.9e-69	hypothetical protein CHLNCDRAFT_137495 [Chlorella variabilis]>gi|307104878|gb|EFN53130.1| hypothetical protein CHLNCDRAFT_137495 [Chlorella variabilis]	--	--	--	--	--	--	--	--	--	Q6Z6L4	318	2e-27	Aminopeptidase M1-A OS=Oryza sativa subsp. japonica GN=Os02g0218200 PE=2 SV=1	PF07822//PF04117//PF01433//PF08122	Neurotoxin B-IV-like protein//Mpv17 / PMP22 family//Peptidase family M1//NADH-ubiquinone oxidoreductase B12 subunit family	GO:0009405//GO:0006810//GO:0022900	pathogenesis//transport//electron transport chain	GO:0008237//GO:0008270//GO:0019871	metallopeptidase activity//zinc ion binding//sodium channel inhibitor activity	GO:0005576//GO:0005747//GO:0005739//GO:0016021	extracellular region//mitochondrial respiratory chain complex I//mitochondrion//integral component of membrane	KOG1046	Puromycin-sensitive aminopeptidase and related aminopeptidases
Cluster-31803.53318	35.4567	463.908	-3.7097	4.17e-07	6712	552836105	XP_005849090.1	878	2e-91	hypothetical protein CHLNCDRAFT_143608 [Chlorella variabilis]>gi|307108749|gb|EFN56988.1| hypothetical protein CHLNCDRAFT_143608 [Chlorella variabilis]			66	1e-22		--	--	--	--	B3H5K9	177	5.4e-11	Protein NEDD1 OS=Arabidopsis thaliana GN=NEDD1 PE=2 SV=1	PF00400//PF00847//PF00003	WD domain, G-beta repeat//AP2 domain//7 transmembrane sweet-taste receptor of 3 GCPR	GO:0007186//GO:0006355	G-protein coupled receptor signaling pathway//regulation of transcription, DNA-templated	GO:0004930//GO:0005515//GO:0003700	G-protein coupled receptor activity//protein binding//transcription factor activity, sequence-specific DNA binding	GO:0005667//GO:0016021	transcription factor complex//integral component of membrane	--	--
Cluster-31803.55479	395.393	2481.15	-2.6497	4.2e-07	235	552809186	XP_005842883.1	251	3.5e-20	hypothetical protein CHLNCDRAFT_142476 [Chlorella variabilis]>gi|307102498|gb|EFN50771.1| hypothetical protein CHLNCDRAFT_142476 [Chlorella variabilis]			49	8.55e-15		--	--	--	--	--	--	--	--	PF00020//PF07562	TNFR/NGFR cysteine-rich region//Nine Cysteines Domain of family 3 GPCR	GO:0007186	G-protein coupled receptor signaling pathway	GO:0005515//GO:0004930	protein binding//G-protein coupled receptor activity	--	--	--	--
Cluster-31803.73414	317.888	17.3282	4.1973	4.42e-07	7556	552846543	XP_005851652.1	2545	1.1e-284	hypothetical protein CHLNCDRAFT_56812 [Chlorella variabilis]>gi|307111315|gb|EFN59550.1| hypothetical protein CHLNCDRAFT_56812 [Chlorella variabilis]			826	0		K15292	STXBP1, MUNC18-1	syntaxin-binding protein 1	http://www.genome.jp/dbget-bin/www_bget?ko:K15292	Q9C5X3	1052	2.1e-112	SNARE-interacting protein KEULE OS=Arabidopsis thaliana GN=KEU PE=1 SV=2	PF01213//PF03999//PF00995	Adenylate cyclase associated (CAP) N terminal//Microtubule associated protein (MAP65/ASE1 family)//Sec1 family	GO:0006904//GO:0000910//GO:0007010//GO:0016192//GO:0000226	vesicle docking involved in exocytosis//cytokinesis//cytoskeleton organization//vesicle-mediated transport//microtubule cytoskeleton organization	GO:0003779//GO:0008017	actin binding//microtubule binding	GO:0045298	tubulin complex	KOG1300	Vesicle trafficking protein Sec1
Cluster-31803.23447	160.062	1193.05	-2.8979	4.55e-07	5559	552836315	XP_005849137.1	544	8.8e-53	hypothetical protein CHLNCDRAFT_51331 [Chlorella variabilis]>gi|307108796|gb|EFN57035.1| hypothetical protein CHLNCDRAFT_51331 [Chlorella variabilis]			49	2.33e-13		K00432	E1.11.1.9	glutathione peroxidase	http://www.genome.jp/dbget-bin/www_bget?ko:K00432	Q9SZ54	379	1.7e-34	Putative glutathione peroxidase 7, chloroplastic OS=Arabidopsis thaliana GN=GPX7 PE=3 SV=2	PF13855//PF00255//PF00578	Leucine rich repeat//Glutathione peroxidase//AhpC/TSA family	GO:0006804//GO:0006749//GO:0006979//GO:0055114	obsolete peroxidase reaction//glutathione metabolic process//response to oxidative stress//oxidation-reduction process	GO:0016491//GO:0004602//GO:0005515//GO:0016209	oxidoreductase activity//glutathione peroxidase activity//protein binding//antioxidant activity	--	--	KOG1651	Glutathione peroxidase
Cluster-31803.39991	138.745	0	Inf	4.68e-07	6316	552828121	XP_005847400.1	800	2.1e-82	hypothetical protein CHLNCDRAFT_57939 [Chlorella variabilis]>gi|307107054|gb|EFN55298.1| hypothetical protein CHLNCDRAFT_57939 [Chlorella variabilis]			352	0		K16470	DZIP1	zinc finger protein DZIP1	http://www.genome.jp/dbget-bin/www_bget?ko:K16470	B3H615	167	7.3e-10	PHD finger protein ING2 OS=Arabidopsis thaliana GN=ING2 PE=1 SV=1	PF00769//PF13851	Ezrin/radixin/moesin family//Growth-arrest specific micro-tubule binding	GO:0048870	cell motility	GO:0008092	cytoskeletal protein binding	GO:0019898//GO:0005737//GO:0031514	extrinsic component of membrane//cytoplasm//motile cilium	--	--
Cluster-31803.44611	235.684	1583.07	-2.7478	4.81e-07	1174	--	--	--	--	--	--	--	--	--	--	--	--	--	--	--	--	--	--	PF06112	Gammaherpesvirus capsid protein	--	--	--	--	GO:0019028	viral capsid	--	--
Cluster-31803.73278	60.9036	615.275	-3.3366	5e-07	3472	552815927	XP_005844554.1	748	1.2e-76	hypothetical protein CHLNCDRAFT_36808 [Chlorella variabilis]>gi|307104197|gb|EFN52452.1| hypothetical protein CHLNCDRAFT_36808 [Chlorella variabilis]	--	--	--	--	--	--	--	--	--	O49292	463	1.9e-44	PsbP domain-containing protein 4, chloroplastic OS=Arabidopsis thaliana GN=PPD4 PE=1 SV=2	PF01416//PF01789//PF04434	tRNA pseudouridine synthase//PsbP//SWIM zinc finger	GO:0001522//GO:0009451//GO:0015979	pseudouridine synthesis//RNA modification//photosynthesis	GO:0009982//GO:0005509//GO:0003723//GO:0008270	pseudouridine synthase activity//calcium ion binding//RNA binding//zinc ion binding	GO:0019898//GO:0009523//GO:0009654	extrinsic component of membrane//photosystem II//photosystem II oxygen evolving complex	--	--
Cluster-31803.40297	0	142.322	#NAME?	5.16e-07	6643	552813964	XP_005844077.1	1886	2.6e-208	hypothetical protein CHLNCDRAFT_139472 [Chlorella variabilis]>gi|307103717|gb|EFN51975.1| hypothetical protein CHLNCDRAFT_139472 [Chlorella variabilis]			280	1.08e-141		--	--	--	--	Q94KD3	1150	7.9e-124	Vacuolar protein sorting-associated protein 52 A OS=Arabidopsis thaliana GN=VPS52 PE=1 SV=1	PF07562//PF00020	Nine Cysteines Domain of family 3 GPCR//TNFR/NGFR cysteine-rich region	GO:0007186	G-protein coupled receptor signaling pathway	GO:0004930//GO:0005515	G-protein coupled receptor activity//protein binding	--	--	KOG1961	Vacuolar sorting protein VPS52/suppressor of actin Sac2
Cluster-31803.105996	47.2675	525.555	-3.4749	5.18e-07	2669	761974279	KIZ04397.1	509	4.8e-49	Dual specificity protein kinase shkE [Monoraphidium neglectum]			93	3.86e-38		--	--	--	--	Q947G8	172	8.1e-11	Galactinol synthase 1 OS=Solanum lycopersicum GN=GOLS1 PE=2 SV=1	PF07714//PF07941//PF12549//PF00069//PF01501	Protein tyrosine kinase//Potassium channel Kv1.4 tandem inactivation domain//Tyrosine hydroxylase N terminal//Protein kinase domain//Glycosyl transferase family 8	GO:0055114//GO:0006468//GO:0006813//GO:0006570	oxidation-reduction process//protein phosphorylation//potassium ion transport//tyrosine metabolic process	GO:0016757//GO:0004672//GO:0030955//GO:0005524//GO:0004511//GO:0005249	transferase activity, transferring glycosyl groups//protein kinase activity//potassium ion binding//ATP binding//tyrosine 3-monooxygenase activity//voltage-gated potassium channel activity	GO:0016021//GO:0008076	integral component of membrane//voltage-gated potassium channel complex	--	--
Cluster-31803.31633	0	2806.32	#NAME?	5.18e-07	3232	552840784	XP_005850140.1	331	2.6e-28	hypothetical protein CHLNCDRAFT_34430 [Chlorella variabilis]>gi|307109801|gb|EFN58038.1| hypothetical protein CHLNCDRAFT_34430 [Chlorella variabilis]			88	2.82e-35		K09500	CCT8	T-complex protein 1 subunit theta	http://www.genome.jp/dbget-bin/www_bget?ko:K09500	Q6EE31	200	5.6e-14	T-complex protein 1 subunit theta OS=Gallus gallus GN=CCT8 PE=1 SV=3	PF00118	TCP-1/cpn60 chaperonin family	GO:0044267	cellular protein metabolic process	GO:0005524//GO:0000166	ATP binding//nucleotide binding	--	--	KOG0362	Chaperonin complex component, TCP-1 theta subunit (CCT8)
Cluster-31803.74400	0	113.2	#NAME?	5.31e-07	1911	760445875	XP_011400006.1	523	8.3e-51	hypothetical protein F751_5882 [Auxenochlorella protothecoides]>gi|675354610|gb|KFM27050.1| hypothetical protein F751_5882 [Auxenochlorella protothecoides]			215	4.17e-106		--	--	--	--	Q852K0	377	9.8e-35	Probable zinc metalloprotease EGY1, chloroplastic OS=Oryza sativa subsp. japonica GN=EGY1 PE=2 SV=3	PF02163//PF03030//PF12300	Peptidase family M50//Inorganic H+ pyrophosphatase//Protein of unknown function (DUF3628)	GO:0015992//GO:0006119//GO:0006508	proton transport//oxidative phosphorylation//proteolysis	GO:0009678//GO:0004222//GO:0016817//GO:0004427	hydrogen-translocating pyrophosphatase activity//metalloendopeptidase activity//hydrolase activity, acting on acid anhydrides//inorganic diphosphatase activity	GO:0016020	membrane	--	--
Cluster-31803.101530	137.571	0	Inf	5.34e-07	7567	552824788	XP_005846673.1	454	3.3e-42	hypothetical protein CHLNCDRAFT_13137, partial [Chlorella variabilis]>gi|307106325|gb|EFN54571.1| hypothetical protein CHLNCDRAFT_13137, partial [Chlorella variabilis]	--	--	--	--	--	--	--	--	--	Q54P70	223	2.8e-16	OTU domain-containing protein DDB_G0284757 OS=Dictyostelium discoideum GN=DDB_G0284757 PE=3 SV=2	PF06753//PF00514//PF06112	Bradykinin//Armadillo/beta-catenin-like repeat//Gammaherpesvirus capsid protein	GO:0006950//GO:0007165	response to stress//signal transduction	GO:0005515//GO:0005179	protein binding//hormone activity	GO:0005576//GO:0019028	extracellular region//viral capsid	KOG2605	OTU (ovarian tumor)-like cysteine protease
Cluster-31803.77505	147.547	1129.04	-2.9359	5.48e-07	2889	552842683	XP_005850634.1	614	3.5e-61	hypothetical protein CHLNCDRAFT_20098 [Chlorella variabilis]>gi|307110296|gb|EFN58532.1| hypothetical protein CHLNCDRAFT_20098 [Chlorella variabilis]	--	--	--	--	--	K15777	DOPA	4,5-DOPA dioxygenase extradiol	http://www.genome.jp/dbget-bin/www_bget?ko:K15777	Q70FG7	377	1.5e-34	4,5-DOPA dioxygenase extradiol OS=Beta vulgaris GN=DODA PE=1 SV=1	PF13994//PF02900	PgaD-like protein//Catalytic LigB subunit of aromatic ring-opening dioxygenase	GO:0042710//GO:0055114//GO:0006725	biofilm formation//oxidation-reduction process//cellular aromatic compound metabolic process	GO:0008270//GO:0008198//GO:0016491//GO:0016701	zinc ion binding//ferrous iron binding//oxidoreductase activity//oxidoreductase activity, acting on single donors with incorporation of molecular oxygen	--	--	--	--
Cluster-31803.39358	633.374	1.5068	8.7154	5.62e-07	1049	--	--	--	--	--	--	--	--	--	--	--	--	--	--	--	--	--	--	--	--	--	--	--	--	--	--	--	--
Cluster-31803.60874	1.06755	142.601	-7.0615	5.66e-07	2946	552847696	XP_005851926.1	151	1.7e-07	hypothetical protein CHLNCDRAFT_59546 [Chlorella variabilis]>gi|307111590|gb|EFN59824.1| hypothetical protein CHLNCDRAFT_59546 [Chlorella variabilis]			39	4.46e-08		--	--	--	--	--	--	--	--	PF01213	Adenylate cyclase associated (CAP) N terminal	GO:0007010	cytoskeleton organization	GO:0003779	actin binding	--	--	--	--
Cluster-31803.66370	331.071	2570.64	-2.9569	5.84e-07	1958	552840416	XP_005850039.1	792	5.4e-82	hypothetical protein CHLNCDRAFT_142031 [Chlorella variabilis]>gi|307109700|gb|EFN57937.1| hypothetical protein CHLNCDRAFT_142031 [Chlorella variabilis]	--	--	--	--	--	K00472	E1.14.11.2	prolyl 4-hydroxylase	http://www.genome.jp/dbget-bin/www_bget?ko:K00472	F4J0A8	298	1.5e-25	Probable prolyl 4-hydroxylase 6 OS=Arabidopsis thaliana GN=P4H6 PE=2 SV=1	PF03171//PF12906//PF12861//PF07776//PF13639//PF13640	2OG-Fe(II) oxygenase superfamily//RING-variant domain//Anaphase-promoting complex subunit 11 RING-H2 finger//Zinc-finger associated domain (zf-AD)//Ring finger domain//2OG-Fe(II) oxygenase superfamily	GO:0016567//GO:0055114	protein ubiquitination//oxidation-reduction process	GO:0004842//GO:0016491//GO:0016705//GO:0043167//GO:0008270//GO:0005515	ubiquitin-protein transferase activity//oxidoreductase activity//oxidoreductase activity, acting on paired donors, with incorporation or reduction of molecular oxygen//ion binding//zinc ion binding//protein binding	GO:0005680//GO:0005634	anaphase-promoting complex//nucleus	--	--
Cluster-31803.47215	509.708	3103.33	-2.6061	6.15e-07	842	--	--	--	--	--	--	--	--	--	--	--	--	--	--	--	--	--	--	PF01061//PF02060	ABC-2 type transporter//Slow voltage-gated potassium channel	GO:0006811//GO:0006813	ion transport//potassium ion transport	GO:0005249	voltage-gated potassium channel activity	GO:0016020//GO:0008076	membrane//voltage-gated potassium channel complex	--	--
Cluster-31803.50990	174.737	1265.5	-2.8564	6.17e-07	2581	--	--	--	--	--	--	--	--	--	--	--	--	--	--	--	--	--	--	PF01530	Zinc finger, C2HC type	GO:0006355	regulation of transcription, DNA-templated	GO:0008270//GO:0003700	zinc ion binding//transcription factor activity, sequence-specific DNA binding	GO:0005667//GO:0005634	transcription factor complex//nucleus	--	--
Cluster-31803.56356	136.361	0	Inf	6.17e-07	4146	159479888	XP_001698018.1	843	1.4e-87	hypothetical protein CHLREDRAFT_120516 [Chlamydomonas reinhardtii]>gi|158273817|gb|EDO99603.1| predicted protein, partial [Chlamydomonas reinhardtii]			258	1.14e-129		K18121	GLYR	glyoxylate/succinic semialdehyde reductase	http://www.genome.jp/dbget-bin/www_bget?ko:K18121	F4I907	790	2.7e-82	Glyoxylate/succinic semialdehyde reductase 2, chloroplastic OS=Arabidopsis thaliana GN=GLYR2 PE=1 SV=1	PF03446//PF13851//PF00038//PF10099//PF02558//PF01210//PF08704//PF08702//PF14833//PF05836//PF01135//PF05175//PF02737//PF02826	NAD binding domain of 6-phosphogluconate dehydrogenase//Growth-arrest specific micro-tubule binding//Intermediate filament protein//Anti-sigma-K factor rskA//Ketopantoate reductase PanE/ApbA//NAD-dependent glycerol-3-phosphate dehydrogenase N-terminus//tRNA methyltransferase complex GCD14 subunit//Fibrinogen alpha/beta chain family//NAD-binding of NADP-dependent 3-hydroxyisobutyrate dehydrogenase…	GO:0046168//GO:0048870//GO:0055114//GO:0009451//GO:0018874//GO:0006550//GO:0006464//GO:0006633//GO:0006631//GO:0006552//GO:0008033//GO:0006479//GO:0007275//GO:0006568//GO:0030488//GO:0030168//GO:0019521//GO:0007165//GO:0006098//GO:0051258//GO:0006574//GO:0015940//GO:0046500//GO:0006554	glycerol-3-phosphate catabolic process//cell motility//oxidation-reduction process//RNA modification//benzoate metabolic process//isoleucine catabolic process//cellular protein modification process//fatty acid biosynthetic process//fatty acid metabolic process//leucine catabolic process//tRNA processing//protein methylation//multicellular organismal development//tryptophan metabolic process//tRNA…	GO:0008677//GO:0004719//GO:0005102//GO:0051287//GO:0030674//GO:0003857//GO:0016491//GO:0016616//GO:0005198//GO:0016429//GO:0004616//GO:0008168	2-dehydropantoate 2-reductase activity//protein-L-isoaspartate (D-aspartate) O-methyltransferase activity//receptor binding//NAD binding//protein binding, bridging//3-hydroxyacyl-CoA dehydrogenase activity//oxidoreductase activity//oxidoreductase activity, acting on the CH-OH group of donors, NAD or NADP as acceptor//structural molecule activity//tRNA (adenine-N1-)-methyltransferase activity//pho…	GO:0005577//GO:0005886//GO:0031514//GO:0042600//GO:0031515//GO:0016021//GO:0005882	fibrinogen complex//plasma membrane//motile cilium//chorion//tRNA (m1A) methyltransferase complex//integral component of membrane//intermediate filament	KOG0409	Predicted dehydrogenase
Cluster-31803.46427	3012.23	208.868	3.8502	6.49e-07	2001	552830447	XP_005847906.1	1508	5.2e-165	hypothetical protein CHLNCDRAFT_56139 [Chlorella variabilis]>gi|307107562|gb|EFN55804.1| hypothetical protein CHLNCDRAFT_56139 [Chlorella variabilis]			454	0		K01539	ATP1A	sodium/potassium-transporting ATPase subunit alpha	http://www.genome.jp/dbget-bin/www_bget?ko:K01539	P28774	810	6.4e-85	Sodium/potassium-transporting ATPase subunit alpha-B OS=Artemia franciscana PE=2 SV=1	PF00122//PF03419//PF13903	E1-E2 ATPase//Sporulation factor SpoIIGA//PMP-22/EMP/MP20/Claudin tight junction	GO:0006508//GO:0006812//GO:0006754//GO:0030436	proteolysis//cation transport//ATP biosynthetic process//asexual sporulation	GO:0004190//GO:0005524//GO:0000166//GO:0015662//GO:0046872	aspartic-type endopeptidase activity//ATP binding//nucleotide binding//ATPase activity, coupled to transmembrane movement of ions, phosphorylative mechanism//metal ion binding	GO:0016021	integral component of membrane	KOG0203	Na+/K+ ATPase, alpha subunit
Cluster-31803.99152	229.167	1573.66	-2.7797	6.53e-07	436	--	--	--	--	--	--	--	--	--	--	--	--	--	--	--	--	--	--	--	--	--	--	--	--	--	--	--	--
Cluster-31803.109009	297.181	11.7832	4.6565	6.6e-07	1820	552812936	XP_005843826.1	327	4.2e-28	expressed protein [Chlorella variabilis]>gi|307103464|gb|EFN51724.1| expressed protein [Chlorella variabilis]	--	--	--	--	--	--	--	--	--	--	--	--	--	PF00010//PF00490//PF13291//PF06085//PF01842	Helix-loop-helix DNA-binding domain//Delta-aminolevulinic acid dehydratase//ACT domain//Lipoprotein Rz1 precursor//ACT domain	GO:0015994//GO:0019064//GO:0033014//GO:0008152	chlorophyll metabolic process//fusion of virus membrane with host plasma membrane//tetrapyrrole biosynthetic process//metabolic process	GO:0004655//GO:0046983//GO:0016597//GO:0046872	porphobilinogen synthase activity//protein dimerization activity//amino acid binding//metal ion binding	GO:0019867	outer membrane	--	--
Cluster-31803.76918	4.34766	190.362	-5.4524	6.64e-07	1113	552818162	XP_005845127.1	153	3.8e-08	hypothetical protein CHLNCDRAFT_137523 [Chlorella variabilis]>gi|307104773|gb|EFN53025.1| hypothetical protein CHLNCDRAFT_137523 [Chlorella variabilis]	--	--	--	--	--	--	--	--	--	--	--	--	--	--	--	--	--	--	--	--	--	--	--
Cluster-31803.103871	0.35585	121.93	-8.4206	6.82e-07	894	552812277	XP_005843670.1	165	1.3e-09	hypothetical protein CHLNCDRAFT_140053 [Chlorella variabilis]>gi|307103307|gb|EFN51568.1| hypothetical protein CHLNCDRAFT_140053 [Chlorella variabilis]	--	--	--	--	--	--	--	--	--	--	--	--	--	PF06990//PF10099//PF03567	Galactose-3-O-sulfotransferase//Anti-sigma-K factor rskA//Sulfotransferase family	GO:0006687//GO:0009058	glycosphingolipid metabolic process//biosynthetic process	GO:0001733//GO:0008146	galactosylceramide sulfotransferase activity//sulfotransferase activity	GO:0005886//GO:0016021//GO:0005794	plasma membrane//integral component of membrane//Golgi apparatus	--	--
Cluster-31803.41012	81.3154	718.235	-3.1429	6.86e-07	4058	552816508	XP_005844704.1	797	3e-82	hypothetical protein CHLNCDRAFT_26561, partial [Chlorella variabilis]>gi|307104348|gb|EFN52602.1| hypothetical protein CHLNCDRAFT_26561, partial [Chlorella variabilis]	--	--	--	--	--	K12386	CTNS	cystinosin	http://www.genome.jp/dbget-bin/www_bget?ko:K12386	Q9VCR7	420	2.2e-39	Cystinosin homolog OS=Drosophila melanogaster GN=CG17119 PE=1 SV=2	PF05374	Mu-Conotoxin	GO:0006810//GO:0009405	transport//pathogenesis	GO:0019871	sodium channel inhibitor activity	GO:0005576	extracellular region	KOG3145	Cystine transporter Cystinosin
Cluster-31803.55406	966.629	116.049	3.0582	6.86e-07	2129	--	--	--	--	--	--	--	--	--	--	--	--	--	--	--	--	--	--	PF00170	bZIP transcription factor	GO:0006355	regulation of transcription, DNA-templated	GO:0003700//GO:0043565	transcription factor activity, sequence-specific DNA binding//sequence-specific DNA binding	GO:0005667	transcription factor complex	--	--
Cluster-31803.83601	1159.35	161.243	2.846	6.94e-07	2416	760438885	XP_011396511.1	1260	3.6e-136	IMP-specific 5'-nucleotidase 1 [Auxenochlorella protothecoides]>gi|675351197|gb|KFM23637.1| IMP-specific 5'-nucleotidase 1 [Auxenochlorella protothecoides]			215	5.29e-106		K18550	ISN1	IMP and pyridine-specific 5'-nucleotidase	http://www.genome.jp/dbget-bin/www_bget?ko:K18550	Q75EG6	505	1.8e-49	IMP-specific 5'-nucleotidase 1 OS=Ashbya gossypii (strain ATCC 10895 / CBS 109.51 / FGSC 9923 / NRRL Y-1056) GN=ISN1 PE=3 SV=1	PF06437	IMP-specific 5'-nucleotidase	GO:0009117//GO:0006190	nucleotide metabolic process//inosine salvage	GO:0050483//GO:0000287	IMP 5'-nucleotidase activity//magnesium ion binding	--	--	--	--
Cluster-31803.41710	668.144	69.7453	3.26	7.06e-07	1475	552815097	XP_005844354.1	233	2.7e-17	hypothetical protein CHLNCDRAFT_54582 [Chlorella variabilis]>gi|307103996|gb|EFN52252.1| hypothetical protein CHLNCDRAFT_54582 [Chlorella variabilis]	--	--	--	--	--	--	--	--	--	P21849	141	1.8e-07	Major surface-labeled trophozoite antigen 417 OS=Giardia intestinalis GN=TSA 417 PE=2 SV=1	--	--	--	--	--	--	--	--	--	--
Cluster-31803.41711	668.144	69.7453	3.26	7.06e-07	1475	552815097	XP_005844354.1	233	2.7e-17	hypothetical protein CHLNCDRAFT_54582 [Chlorella variabilis]>gi|307103996|gb|EFN52252.1| hypothetical protein CHLNCDRAFT_54582 [Chlorella variabilis]	--	--	--	--	--	--	--	--	--	P21849	141	1.8e-07	Major surface-labeled trophozoite antigen 417 OS=Giardia intestinalis GN=TSA 417 PE=2 SV=1	--	--	--	--	--	--	--	--	--	--
Cluster-31803.50815	1360.19	7426.57	-2.4489	7.07e-07	1031	552832949	XP_005848446.1	592	4.4e-59	hypothetical protein CHLNCDRAFT_144815 [Chlorella variabilis]>gi|307108103|gb|EFN56344.1| hypothetical protein CHLNCDRAFT_144815 [Chlorella variabilis]	--	--	--	--	--	--	--	--	--	--	--	--	--	PF13185//PF00989//PF06422//PF03760	GAF domain//PAS fold//CDR ABC transporter//Late embryogenesis abundant (LEA) group 1	GO:0006810//GO:0006355//GO:0009790	transport//regulation of transcription, DNA-templated//embryo development	GO:0005524//GO:0042626//GO:0005515	ATP binding//ATPase activity, coupled to transmembrane movement of substances//protein binding	GO:0016021	integral component of membrane	--	--
Cluster-31803.99848	0	109.258	#NAME?	7.1e-07	1005	--	--	--	--	--	--	--	--	--	--	--	--	--	--	--	--	--	--	PF09606	ARC105 or Med15 subunit of Mediator complex non-fungal	GO:0006357	regulation of transcription from RNA polymerase II promoter	GO:0001104	RNA polymerase II transcription cofactor activity	GO:0016592	mediator complex	--	--
Cluster-31803.45140	2097.19	11484.5	-2.4532	7.21e-07	477	552824930	XP_005846706.1	730	2e-75	hypothetical protein CHLNCDRAFT_58128 [Chlorella variabilis]>gi|307106358|gb|EFN54604.1| hypothetical protein CHLNCDRAFT_58128 [Chlorella variabilis]	--	--	--	--	--	--	--	--	--	Q39134	213	2.6e-16	Amino acid permease 3 OS=Arabidopsis thaliana GN=AAP3 PE=1 SV=2	--	--	--	--	--	--	GO:0016021	integral component of membrane	--	--
Cluster-31803.55484	26817.9	170997	-2.6727	7.36e-07	406	552809140	XP_005842870.1	394	1.6e-36	hypothetical protein CHLNCDRAFT_55572 [Chlorella variabilis]>gi|307102485|gb|EFN50758.1| hypothetical protein CHLNCDRAFT_55572 [Chlorella variabilis]			60	1.21e-20		--	--	--	--	Q4LDE5	147	9.7e-09	Sushi, von Willebrand factor type A, EGF and pentraxin domain-containing protein 1 OS=Homo sapiens GN=SVEP1 PE=1 SV=3	PF07562//PF00020	Nine Cysteines Domain of family 3 GPCR//TNFR/NGFR cysteine-rich region	GO:0007186	G-protein coupled receptor signaling pathway	GO:0004930//GO:0005515	G-protein coupled receptor activity//protein binding	--	--	--	--
Cluster-31803.41517	207.594	1451.61	-2.8058	7.43e-07	2807	552820901	XP_005845704.1	750	5.8e-77	hypothetical protein CHLNCDRAFT_136834 [Chlorella variabilis]>gi|307105352|gb|EFN53602.1| hypothetical protein CHLNCDRAFT_136834 [Chlorella variabilis]	--	--	--	--	--	K04424	ZAK, MLTK	sterile alpha motif and leucine zipper containing kinase AZK	http://www.genome.jp/dbget-bin/www_bget?ko:K04424	Q05609	460	3.4e-44	Serine/threonine-protein kinase CTR1 OS=Arabidopsis thaliana GN=CTR1 PE=1 SV=1	PF07714//PF00069	Protein tyrosine kinase//Protein kinase domain	GO:0006468	protein phosphorylation	GO:0005524//GO:0004672	ATP binding//protein kinase activity	--	--	--	--
Cluster-31803.103235	19.8913	331.813	-4.0602	7.45e-07	1708	--	--	--	--	--	--	--	--	--	--	--	--	--	--	--	--	--	--	PF04995	Heme exporter protein D (CcmD)	GO:0015886//GO:0017004	heme transport//cytochrome complex assembly	--	--	GO:0016021	integral component of membrane	--	--
Cluster-31803.91629	2.8468	301.405	-6.7262	7.51e-07	4259	552826130	XP_005846961.1	486	3.6e-46	expressed protein [Chlorella variabilis]>gi|307106614|gb|EFN54859.1| expressed protein [Chlorella variabilis]	--	--	--	--	--	--	--	--	--	--	--	--	--	PF10462	Peptidase M66	--	--	GO:0004222	metalloendopeptidase activity	--	--	--	--
[truncated: 2,959 more rows]

## Sheet: DEGs annotion of Nacl2
DEG annotions of the 0.8 M NaCl treatment (Nacl2) compared to the normal on day 18 (CK18).
[truncated: 15,576 more rows]
