# Supplementary material for: Lipid accumulation of Chlorella sp. TLD6B from the Taklimakan Desert under salt stress
Source: PeerJ. 2021 May 31;9:e11525. doi: 10.7717/peerj.11525 (PMC8174150; doi:10.7717/peerj.11525)
Supplement: Supplemental Information 7 [file peerj-09-11525-s007.xlsx]

## Sheet: Primer list
Primers used in qRT–PCR analysis.
Gene ID	Log2FC		Gene name	Sense primer (5′–3′)	Antisense primer (5′–3′)
	Nacl1/CK18	Nacl2/CK18
Cluster-31803.78413_1	4.96	4.04	Biotin carboxyl carrier protein of acetyl-CoA carboxylase (BCCP)	CTCTCCACCCCCAGCTTCAG	GGCGTGCTCGTCTACCTCTC
Cluster-31803.17167	3.63	3.03	3-oxoacyl-[acyl-carrier-protein] synthase II (KASII)	GCCCCAACTACCCCATCTCAAC	TCTCCCATCACAAAGCCGTCAC
Cluster-31803.69560	4.99	2.64	Triose-phosphate isomerase (TPI)	TCACACACCCGCACCTAACT	CACCACCTCCACGACATCAG
Cluster-31803.75598	2.61	2.38	Pyruvate kinase (PK)	ATTTTATTACTTTTTGTCTT	CTCTATGCTTCCTCCTGTCT
Cluster-31803.102126	2.02	2.61	Phosphoenolpyruvate carboxylase (PEPC)	TTTCATCTGCCCACTCGT	CATCCTCTGCCGTCCCGT
Cluster-31803.80535	1.9	1.27	Pyruvate dehydrogenase (PDH)	GCAAAGGCACGCACAGAC	AAACCCGCTACCCCAAAC
Cluster-31803.56093	1.88	3.16	Glucose-6-phosphate dehydrogenase (G6PD)	GTCAGCCACTCTTTTCTC	CTGCGTCTTTTGCTACTA
Cluster-31803.51132	−5.27	−5.00	6-phosphogluconate dehydrogenase (6PGDH)	CACCCTTACCCTCCGACC	CGCCATACTCAATGCCGT
Cluster-31803.26513	−1.29	−2.41	Glyceraldehyde 3-phosphate dehydrogenase (GAPD)	CGAACTTCTCGTCCAGCA	GACACCATCATCTCCAAC
Log2FC, log2(fold-change) in gene expression between two groups; CK, the control; Nacl1/CK18, the 0.1 M NaCl treatment compared to the control on day 18; Nacl2/CK18, the 0.8 M NaCl treatment compared to the control on day 18.

## Sheet: qRT-PCR raw data
Raw data on qRT–PCR.
unigene ID	Target	CT1	CT2	CT3	unigene ID	Reference	CT1	CT2	CT3
Cluster-31803.78413_1	BCCP-1	19.12	19.29	19.67	Cluster-31803.78413_1	BCCP-1	22.22	22.01	22.11
	BCCP-2	19.87	19.92	19.62		BCCP-2	22.35	22.62	22.52
	BCCP-CK	20.52	20.61	20.16		BCCP-CK	17.62	17.42	17.65
Cluster-31803.17167	KASⅡ-1	21.25	21.12	21.68	Cluster-31803.17167	KASⅡ-1	22.22	22.01	22.11
	KASⅡ-2	21.26	21.73	21.82		KASⅡ-2	22.35	22.62	22.52
	KASⅡ-CK	20.46	20.38	20.72		KASⅡ-CK	17.62	17.42	17.65
Cluster-31803.69560	TPI-1	18.05	17.85	18.21	Cluster-31803.69560	TPI-1	22.22	22.01	22.11
	TPI-2	19.02	19.09	19.16		TPI-2	22.35	22.62	22.52
	TPI-CK	19.82	20.08	20.12		TPI-CK	17.62	17.42	17.65
Cluster-31803.75598	PK-1	20.08	20.56	20.12	Cluster-31803.75598	PK-1	22.22	22.01	22.11
	PK-2	20.47	20.16	20.56		PK-2	22.35	22.62	22.52
	PK-CK	20.36	20.22	20.39		PK-CK	17.62	17.42	17.65
Cluster-31803.102126	PEPC-1	19.62	19.58	19.83	Cluster-31803.102126	PEPC-1	22.22	22.01	22.11
	PEPC-2	22.07	21.96	22.15		PEPC-2	22.35	22.62	22.52
	PEPC-CK	19.94	20.11	20.21		PEPC-CK	17.62	17.42	17.65
Cluster-31803.80535	PDH-1	21.98	22.33	22.22	Cluster-31803.80535	PDH-1	22.22	22.01	22.11
	PDH-2	21.28	21.02	21.06		PDH-2	22.35	22.62	22.52
	PDH-CK	20.86	20.35	20.61		PDH-CK	17.62	17.42	17.65
Cluster-31803.56093	G6PD-1	23.82	23.58	23.61	Cluster-31803.56093	G6PD-1	22.22	22.01	22.11
	G6PD-2	24.02	23.98	24.16		G6PD-2	22.35	22.62	22.52
	G6PD-CK	20.08	20.11	20.23		G6PD-CK	17.62	17.42	17.65
Cluster-31803.51132	6PGDH-1	29.92	30.37	30.32	Cluster-31803.51132	6PGDH-1	22.22	22.01	22.11
	6PGDH-2	29.22	29.46	29.27		6PGDH-2	22.35	22.62	22.52
	6PGDH-CK	18.83	19.23	19.25		6PGDH-CK	17.62	17.42	17.65
Cluster-31803.26513	GAPD-1	29.96	29.98	29.37	Cluster-31803.26513	GAPD-1	22.22	22.01	22.11
	GAPD-2	26.72	26.58	26.36		GAPD-2	22.35	22.62	22.52
	GAPD-CK	17.88	17.46	17.76		GAPD-CK	17.62	17.42	17.65
Cluster-31803.78413_1, unigene ID; BCCP-1, CT value of BCCP target/reference gene under low salinity (0.1 M NaCl addition); BCCP-2, CT value of BCCP target/reference gene under high salinity (0.8 M NaCl addition); BCCP-CK, CT value of BCCP target/reference gene in control group; CK, the control; CT1, CT value measured in the first biological replicate; and so forth. Abbreviated gene names are def…

## Sheet: RNA-seq data
The expression levels of nine different genes in the RNA sequencing results of Chlorella TLD6B under different salt treatments.
Enzyme	Gene ID	Log2FC		Putative function
		Nacl1/CK18	Nacl2/CK18
BCCP	Cluster-31803.78413_1	4.9613	4.0361	Biotin carboxyl carrier protein of acetyl-CoA carboxylase
KASⅡ	Cluster-31803.17167	3.6334	3.0312	3-oxoacyl-[acyl-carrier-protein] synthase II
TPI	Cluster-31803.69560	4.9892	2.6379	Triosephosphate isomerase
PK	Cluster-31803.75598	2.6103	2.3826	Pyruvate kinase
PEPC	Cluster-31803.102126	2.0206	2.6077	Phosphoenolpyruvate carboxylase
PDH	Cluster-31803.80535	1.9013	1.2657	Pyruvate dehydrogenase
G6PD	Cluster-31803.56093	1.8846	3.1618	Glucose-6-phosphate -dehydrogenase
6PGDH	Cluster-31803.51132	-5.2667	-5.0038	6-phosphogluconate dehydrogenase
GAPD	Cluster-31803.26513	-1.2861	-2.407	glyceraldehyde 3-phosphate dehydrogenase
Log2FC, log2(fold-change) in gene expression; Nacl1/CK18, the 0.1 M NaCl treatment compared to the control on day 18; Nacl2/CK18, the 0.8 M NaCl treatment compared to the control on day 18. Abbreviated gene names are defined in Figure 3.
