# Supplementary material for: Lipid accumulation of Chlorella sp. TLD6B from the Taklimakan Desert under salt stress
Source: PeerJ. 2021 May 31;9:e11525. doi: 10.7717/peerj.11525 (PMC8174150; doi:10.7717/peerj.11525)
Supplement: Supplemental Information 8 [file peerj-09-11525-s008.xlsx]

## Sheet: Enriched GO terms in 828
Highly enriched GO terms in 828 unigenes specifically differentially expressed under low salinity (0.1 M NaCl addition).
GO_accession	Description	Term_type	Corrected_pValue	DEG_item	Gene_names
GO:0016741	transferase activity, transferring one-carbon groups	molecular_function	0.005028	52	Cluster-31803.44422,Cluster-31803.53455,Cluster-31803.102494,Cluster-31803.9498,Cluster-31803.39022,Cluster-31803.52629,Cluster-31803.55044,Cluster-31803.6430,Cluster-31803.50040,Cluster-31803.69139,Cluster-31803.26592,Cluster-31803.87027,Cluster-31803.41446,Cluster-31803.54424,Cluster-31803.79448,Cluster-31803.65630,Cluster-31803.25254,Cluster-31803.37713,Cluster-31803.75445,Cluster-31803.107579…
GO:0008168	methyltransferase activity	molecular_function	0.06956	46	Cluster-31803.44422,Cluster-31803.102494,Cluster-31803.53455,Cluster-31803.39022,Cluster-31803.9498,Cluster-31803.26592,Cluster-31803.87027,Cluster-31803.69139,Cluster-31803.55044,Cluster-31803.50040,Cluster-31803.6430,Cluster-31803.41446,Cluster-31803.25254,Cluster-31803.79448,Cluster-31803.65630,Cluster-31803.54424,Cluster-31803.61898,Cluster-31803.43576,Cluster-31803.107579,Cluster-31803.37713…
GO:0016743	carboxyl- or carbamoyltransferase activity	molecular_function	0.06956	6	Cluster-31803.72674,Cluster-31803.64540,Cluster-31803.30959,Cluster-31803.62621,Cluster-31803.52629,Cluster-31803.52620
GO:0006118	obsolete electron transport	biological_process	0.06956	37	Cluster-31803.61564,Cluster-31803.64617,Cluster-31803.96966,Cluster-31803.96358,Cluster-31803.55243,Cluster-31803.64612,Cluster-31803.64605,Cluster-31803.64541,Cluster-31803.56206,Cluster-31803.8555,Cluster-31803.67028,Cluster-31803.44702,Cluster-31803.67675,Cluster-31803.77209,Cluster-31803.48726,Cluster-31803.55475,Cluster-31803.43520,Cluster-31803.98072,Cluster-31803.64542,Cluster-31803.64601,…
GO:0018142	protein-DNA covalent cross-linking	biological_process	0.06956	2	Cluster-31803.54693,Cluster-31803.75355
GO:0018143	nucleic acid-protein covalent cross-linking	biological_process	0.06956	4	Cluster-31803.100458,Cluster-31803.75355,Cluster-31803.54693,Cluster-31803.45055
GO:0035251	UDP-glucosyltransferase activity	molecular_function	0.090346	8	Cluster-31803.64540,Cluster-31803.103378,Cluster-31803.62621,Cluster-31803.52620,Cluster-31803.72674,Cluster-31803.103379,Cluster-31803.52629,Cluster-31803.74549
GO:0009055	electron carrier activity	molecular_function	0.093067	29	Cluster-31803.64596,Cluster-31803.43520,Cluster-31803.25826,Cluster-31803.72674,Cluster-31803.67675,Cluster-31803.44702,Cluster-31803.65426,Cluster-31803.67028,Cluster-31803.64597,Cluster-31803.41396,Cluster-31803.74434,Cluster-31803.64601,Cluster-31803.64542,Cluster-31803.98072,Cluster-31803.25822,Cluster-31803.55243,Cluster-31803.96358,Cluster-31803.96966,Cluster-31803.64617,Cluster-31803.61564…
GO:0046527	glucosyltransferase activity	molecular_function	0.11716	9	Cluster-31803.52629,Cluster-31803.74549,Cluster-31803.95433,Cluster-31803.103379,Cluster-31803.72674,Cluster-31803.52620,Cluster-31803.62621,Cluster-31803.103378,Cluster-31803.64540
GO:0016157	sucrose synthase activity	molecular_function	0.14748	5	Cluster-31803.52620,Cluster-31803.52629,Cluster-31803.62621,Cluster-31803.64540,Cluster-31803.72674
GO:0004164	diphthine synthase activity	molecular_function	0.14748	2	Cluster-31803.9498,Cluster-31803.87027
GO:0016597	amino acid binding	molecular_function	0.15338	9	Cluster-31803.64540,Cluster-31803.62621,Cluster-31803.59911,Cluster-31803.52620,Cluster-31803.72674,Cluster-31803.30959,Cluster-31803.6659,Cluster-31803.52629,Cluster-31803.103348
GO:0004750	ribulose-phosphate 3-epimerase activity	molecular_function	0.20674	3	Cluster-31803.59214,Cluster-31803.56331,Cluster-31803.59222
GO:0031406	carboxylic acid binding	molecular_function	0.20674	10	Cluster-31803.52620,Cluster-31803.64540,Cluster-31803.59911,Cluster-31803.62621,Cluster-31803.52629,Cluster-31803.6659,Cluster-31803.103348,Cluster-31803.63895,Cluster-31803.72674,Cluster-31803.30959
GO:0043177	organic acid binding	molecular_function	0.20674	10	Cluster-31803.62621,Cluster-31803.59911,Cluster-31803.64540,Cluster-31803.52620,Cluster-31803.30959,Cluster-31803.63895,Cluster-31803.72674,Cluster-31803.103348,Cluster-31803.52629,Cluster-31803.6659
GO:0007569	cell aging	biological_process	0.22287	3	Cluster-31803.44038,Cluster-31803.45694,Cluster-31803.46305
GO:0016572	histone phosphorylation	biological_process	0.22287	3	Cluster-31803.45694,Cluster-31803.46305,Cluster-31803.44038
GO:0090399	replicative senescence	biological_process	0.22287	3	Cluster-31803.45694,Cluster-31803.46305,Cluster-31803.44038
GO:0007568	aging	biological_process	0.22287	3	Cluster-31803.46305,Cluster-31803.45694,Cluster-31803.44038
GO:0015696	ammonium transport	biological_process	0.22287	4	Cluster-31803.41140,Cluster-31803.71701,Cluster-31803.29054,Cluster-31803.62576
GO:0008519	ammonium transmembrane transporter activity	molecular_function	0.22287	4	Cluster-31803.71701,Cluster-31803.62576,Cluster-31803.29054,Cluster-31803.41140
GO:0015886	heme transport	biological_process	0.22287	7	Cluster-31803.102830,Cluster-31803.79185,Cluster-31803.24020,Cluster-31803.55475,Cluster-31803.10715,Cluster-31803.61089,Cluster-31803.42009
GO:1901678	iron coordination entity transport	biological_process	0.22287	7	Cluster-31803.55475,Cluster-31803.10715,Cluster-31803.61089,Cluster-31803.42009,Cluster-31803.102830,Cluster-31803.24020,Cluster-31803.79185
GO:0071705	nitrogen compound transport	biological_process	0.23095	21	Cluster-31803.40772,Cluster-31803.24020,Cluster-31803.10715,Cluster-31803.62576,Cluster-31803.45214,Cluster-31803.71701,Cluster-31803.79185,Cluster-31803.76092,Cluster-31803.42913,Cluster-31803.29054,Cluster-31803.93098,Cluster-31803.70952,Cluster-31803.41140,Cluster-31803.42009,Cluster-31803.70958,Cluster-31803.55475,Cluster-31803.68945,Cluster-31803.102830,Cluster-31803.61089,Cluster-31803.1382…
GO:0004714	transmembrane receptor protein tyrosine kinase activity	molecular_function	0.24532	4	Cluster-31803.81384,Cluster-31803.65630,Cluster-31803.79266,Cluster-31803.75445
GO:0010927	cellular component assembly involved in morphogenesis	biological_process	0.24532	4	Cluster-31803.74462,Cluster-31803.71701,Cluster-31803.62576,Cluster-31803.41140
GO:0042384	cilium assembly	biological_process	0.24532	4	Cluster-31803.41140,Cluster-31803.71701,Cluster-31803.62576,Cluster-31803.74462
GO:0060271	cilium morphogenesis	biological_process	0.24532	4	Cluster-31803.41140,Cluster-31803.71701,Cluster-31803.62576,Cluster-31803.74462
GO:0006050	mannosamine metabolic process	biological_process	0.2513	3	Cluster-31803.59222,Cluster-31803.56331,Cluster-31803.59214
GO:0006051	N-acetylmannosamine metabolic process	biological_process	0.2513	3	Cluster-31803.59214,Cluster-31803.59222,Cluster-31803.56331
GO:0047465	N-acylglucosamine-6-phosphate 2-epimerase activity	molecular_function	0.2513	3	Cluster-31803.56331,Cluster-31803.59222,Cluster-31803.59214
GO:0044782	cilium organization	biological_process	0.28502	4	Cluster-31803.74462,Cluster-31803.41140,Cluster-31803.71701,Cluster-31803.62576
GO:0030258	lipid modification	biological_process	0.28805	8	Cluster-31803.76193,Cluster-31803.58128,Cluster-31803.100697,Cluster-31803.80077,Cluster-31803.105902,Cluster-31803.63151,Cluster-31803.65440,Cluster-31803.64574
GO:0051181	cofactor transport	biological_process	0.29021	7	Cluster-31803.102830,Cluster-31803.24020,Cluster-31803.79185,Cluster-31803.55475,Cluster-31803.10715,Cluster-31803.61089,Cluster-31803.42009
GO:0004713	protein tyrosine kinase activity	molecular_function	0.29641	5	Cluster-31803.65630,Cluster-31803.81384,Cluster-31803.54463,Cluster-31803.79266,Cluster-31803.75445
GO:0008194	UDP-glycosyltransferase activity	molecular_function	0.41001	11	Cluster-31803.9120,Cluster-31803.74549,Cluster-31803.52629,Cluster-31803.103379,Cluster-31803.72674,Cluster-31803.52620,Cluster-31803.72656,Cluster-31803.35937,Cluster-31803.62621,Cluster-31803.64540,Cluster-31803.103378
GO:0017182	peptidyl-diphthamide metabolic process	biological_process	0.41001	2	Cluster-31803.9498,Cluster-31803.87027
GO:0017183	peptidyl-diphthamide biosynthetic process from peptidyl-histidine	biological_process	0.41001	2	Cluster-31803.9498,Cluster-31803.87027
GO:0007169	transmembrane receptor protein tyrosine kinase signaling pathway	biological_process	0.44539	4	Cluster-31803.81384,Cluster-31803.65630,Cluster-31803.79266,Cluster-31803.75445
GO:0007167	enzyme linked receptor protein signaling pathway	biological_process	0.44539	7	Cluster-31803.81384,Cluster-31803.65630,Cluster-31803.75445,Cluster-31803.15005,Cluster-31803.95642,Cluster-31803.79266,Cluster-31803.9845
GO:0006790	sulfur compound metabolic process	biological_process	0.44539	25	Cluster-31803.64155,Cluster-31803.38042,Cluster-31803.37600,Cluster-31803.99504,Cluster-31803.38855,Cluster-31803.18502,Cluster-31803.45498,Cluster-31803.80077,Cluster-31803.46994,Cluster-31803.38204,Cluster-31803.59602,Cluster-31803.57725,Cluster-31803.40957,Cluster-31803.39022,Cluster-31803.51122,Cluster-31803.64167,Cluster-31803.51447,Cluster-31803.63151,Cluster-31803.4794,Cluster-31803.86310,…
GO:0006073	cellular glucan metabolic process	biological_process	0.44539	14	Cluster-31803.52629,Cluster-31803.95433,Cluster-31803.74549,Cluster-31803.39118,Cluster-31803.26197,Cluster-31803.103379,Cluster-31803.72674,Cluster-31803.52620,Cluster-31803.21942,Cluster-31803.51248,Cluster-31803.20998,Cluster-31803.62621,Cluster-31803.103378,Cluster-31803.64540
GO:0044042	glucan metabolic process	biological_process	0.44539	14	Cluster-31803.26197,Cluster-31803.103379,Cluster-31803.72674,Cluster-31803.39118,Cluster-31803.52629,Cluster-31803.74549,Cluster-31803.95433,Cluster-31803.62621,Cluster-31803.64540,Cluster-31803.103378,Cluster-31803.52620,Cluster-31803.21942,Cluster-31803.51248,Cluster-31803.20998
GO:0016702	oxidoreductase activity, acting on single donors with incorporation of molecular oxygen, incorporation of two atoms of oxygen	molecular_function	0.61935	6	Cluster-31803.15741,Cluster-31803.57451,Cluster-31803.67925,Cluster-31803.96358,Cluster-31803.32149,Cluster-31803.46305
GO:0005982	starch metabolic process	biological_process	0.62976	13	Cluster-31803.103379,Cluster-31803.26197,Cluster-31803.72674,Cluster-31803.52629,Cluster-31803.95433,Cluster-31803.74549,Cluster-31803.62621,Cluster-31803.103378,Cluster-31803.64540,Cluster-31803.21942,Cluster-31803.52620,Cluster-31803.51248,Cluster-31803.20998
GO:0005985	sucrose metabolic process	biological_process	0.62976	13	Cluster-31803.51248,Cluster-31803.20998,Cluster-31803.21942,Cluster-31803.52620,Cluster-31803.64540,Cluster-31803.103378,Cluster-31803.62621,Cluster-31803.95433,Cluster-31803.52629,Cluster-31803.74549,Cluster-31803.72674,Cluster-31803.103379,Cluster-31803.26197
GO:0030031	cell projection assembly	biological_process	0.62976	7	Cluster-31803.25822,Cluster-31803.41140,Cluster-31803.71701,Cluster-31803.25826,Cluster-31803.62576,Cluster-31803.74462,Cluster-31803.55837
GO:0030246	carbohydrate binding	molecular_function	0.66781	14	Cluster-31803.72656,Cluster-31803.84316,Cluster-31803.75872,Cluster-31803.57662,Cluster-31803.100768,Cluster-31803.90372,Cluster-31803.23780,Cluster-31803.9875,Cluster-31803.63895,Cluster-31803.23736,Cluster-31803.48689,Cluster-31803.96237,Cluster-31803.85150,Cluster-31803.26985
GO:0000096	sulfur amino acid metabolic process	biological_process	0.6977	10	Cluster-31803.86310,Cluster-31803.37600,Cluster-31803.38042,Cluster-31803.99504,Cluster-31803.38855,Cluster-31803.69742,Cluster-31803.45498,Cluster-31803.57725,Cluster-31803.51122,Cluster-31803.4794
GO:0042302	structural constituent of cuticle	molecular_function	0.71897	4	Cluster-31803.84316,Cluster-31803.54463,Cluster-31803.35072,Cluster-31803.20011
GO:0031122	cytoplasmic microtubule organization	biological_process	0.71897	3	Cluster-31803.41140,Cluster-31803.62576,Cluster-31803.71701
GO:0035058	nonmotile primary cilium assembly	biological_process	0.71897	3	Cluster-31803.62576,Cluster-31803.71701,Cluster-31803.41140
GO:0097546	ciliary base	cellular_component	0.71897	3	Cluster-31803.71701,Cluster-31803.62576,Cluster-31803.41140
GO:0002684	positive regulation of immune system process	biological_process	0.71897	4	Cluster-31803.45055,Cluster-31803.41140,Cluster-31803.27182,Cluster-31803.71701
GO:0050778	positive regulation of immune response	biological_process	0.71897	4	Cluster-31803.45055,Cluster-31803.41140,Cluster-31803.27182,Cluster-31803.71701
GO:0042592	homeostatic process	biological_process	0.71897	26	Cluster-31803.64541,Cluster-31803.69005,Cluster-31803.8555,Cluster-31803.56206,Cluster-31803.23463,Cluster-31803.54240,Cluster-31803.23780,Cluster-31803.64542,Cluster-31803.48074,Cluster-31803.44058,Cluster-31803.23170,Cluster-31803.54463,Cluster-31803.72549,Cluster-31803.44038,Cluster-31803.74434,Cluster-31803.93098,Cluster-31803.65426,Cluster-31803.45694,Cluster-31803.68814,Cluster-31803.46305,…
GO:0006011	UDP-glucose metabolic process	biological_process	0.71897	3	Cluster-31803.103379,Cluster-31803.103378,Cluster-31803.43048
GO:0032990	cell part morphogenesis	biological_process	0.71897	5	Cluster-31803.74462,Cluster-31803.91716,Cluster-31803.41140,Cluster-31803.62576,Cluster-31803.71701
GO:0048858	cell projection morphogenesis	biological_process	0.71897	5	Cluster-31803.74462,Cluster-31803.62576,Cluster-31803.71701,Cluster-31803.41140,Cluster-31803.91716
GO:0044264	cellular polysaccharide metabolic process	biological_process	0.7371	14	Cluster-31803.62621,Cluster-31803.103378,Cluster-31803.64540,Cluster-31803.52620,Cluster-31803.21942,Cluster-31803.20998,Cluster-31803.51248,Cluster-31803.103379,Cluster-31803.26197,Cluster-31803.72674,Cluster-31803.52629,Cluster-31803.95433,Cluster-31803.74549,Cluster-31803.39118
GO:0044441	ciliary part	cellular_component	0.76246	3	Cluster-31803.41140,Cluster-31803.62576,Cluster-31803.71701
GO:0005813	centrosome	cellular_component	0.76848	3	Cluster-31803.62576,Cluster-31803.71701,Cluster-31803.41140
GO:0016717	oxidoreductase activity, acting on paired donors, with oxidation of a pair of donors resulting in the reduction of molecular oxygen to two molecules of water	molecular_function	0.77205	3	Cluster-31803.48689,Cluster-31803.96909,Cluster-31803.15683
GO:0004413	homoserine kinase activity	molecular_function	0.81808	2	Cluster-31803.86747,Cluster-31803.84665
GO:0005984	disaccharide metabolic process	biological_process	0.88132	13	Cluster-31803.26197,Cluster-31803.103379,Cluster-31803.72674,Cluster-31803.52629,Cluster-31803.95433,Cluster-31803.74549,Cluster-31803.62621,Cluster-31803.64540,Cluster-31803.103378,Cluster-31803.52620,Cluster-31803.21942,Cluster-31803.20998,Cluster-31803.51248
GO:0005975	carbohydrate metabolic process	biological_process	0.90648	64	Cluster-31803.46795,Cluster-31803.52620,Cluster-31803.57530,Cluster-31803.72656,Cluster-31803.84316,Cluster-31803.59214,Cluster-31803.64540,Cluster-31803.11135,Cluster-31803.105554,Cluster-31803.21942,Cluster-31803.103378,Cluster-31803.56331,Cluster-31803.39118,Cluster-31803.40725,Cluster-31803.28030,Cluster-31803.20998,Cluster-31803.44058,Cluster-31803.94898,Cluster-31803.54463,Cluster-31803.414…
GO:0001510	RNA methylation	biological_process	0.92529	10	Cluster-31803.38204,Cluster-31803.81384,Cluster-31803.13030,Cluster-31803.31080,Cluster-31803.39022,Cluster-31803.102494,Cluster-31803.25254,Cluster-31803.51240,Cluster-31803.88081,Cluster-31803.18502
GO:0004523	RNA-DNA hybrid ribonuclease activity	molecular_function	0.92657	3	Cluster-31803.41549,Cluster-31803.35115,Cluster-31803.74308
GO:0003949	1-(5-phosphoribosyl)-5-[(5-phosphoribosylamino)methylideneamino]imidazole-4-carboxamide isomerase activity	molecular_function	0.92657	1	Cluster-31803.93525
GO:0004655	porphobilinogen synthase activity	molecular_function	0.92657	2	Cluster-31803.15518,Cluster-31803.6659
GO:0006555	methionine metabolic process	biological_process	0.92657	6	Cluster-31803.38042,Cluster-31803.37600,Cluster-31803.86310,Cluster-31803.99504,Cluster-31803.4794,Cluster-31803.45498
GO:0022900	electron transport chain	biological_process	0.92657	15	Cluster-31803.48966,Cluster-31803.64597,Cluster-31803.57662,Cluster-31803.64612,Cluster-31803.64602,Cluster-31803.64601,Cluster-31803.64605,Cluster-31803.72674,Cluster-31803.55475,Cluster-31803.55243,Cluster-31803.64596,Cluster-31803.61564,Cluster-31803.53485,Cluster-31803.67675,Cluster-31803.64617
GO:0006520	cellular amino acid metabolic process	biological_process	0.92657	71	Cluster-31803.98485,Cluster-31803.21601,Cluster-31803.100522,Cluster-31803.69518,Cluster-31803.24311,Cluster-31803.40265,Cluster-31803.87059,Cluster-31803.62621,Cluster-31803.72549,Cluster-31803.54712,Cluster-31803.44038,Cluster-31803.33595,Cluster-31803.28776,Cluster-31803.71782,Cluster-31803.77209,Cluster-31803.82070,Cluster-31803.64574,Cluster-31803.84665,Cluster-31803.93526,Cluster-31803.6929…
GO:0007052	mitotic spindle organization	biological_process	0.94176	3	Cluster-31803.71701,Cluster-31803.62576,Cluster-31803.41140
GO:0006082	organic acid metabolic process	biological_process	0.96592	93	Cluster-31803.45055,Cluster-31803.68033,Cluster-31803.80077,Cluster-31803.25822,Cluster-31803.4794,Cluster-31803.40957,Cluster-31803.86747,Cluster-31803.15005,Cluster-31803.77576,Cluster-31803.86310,Cluster-31803.54710,Cluster-31803.69742,Cluster-31803.95642,Cluster-31803.66591,Cluster-31803.84659,Cluster-31803.40663,Cluster-31803.30959,Cluster-31803.79056,Cluster-31803.25826,Cluster-31803.54211,…
GO:0030030	cell projection organization	biological_process	0.96592	8	Cluster-31803.91716,Cluster-31803.41140,Cluster-31803.25822,Cluster-31803.62576,Cluster-31803.25826,Cluster-31803.71701,Cluster-31803.74462,Cluster-31803.55837
GO:0009314	response to radiation	biological_process	0.96592	5	Cluster-31803.67069,Cluster-31803.44038,Cluster-31803.46305,Cluster-31803.101354,Cluster-31803.45694
GO:0018202	peptidyl-histidine modification	biological_process	0.96592	2	Cluster-31803.9498,Cluster-31803.87027
GO:0019752	carboxylic acid metabolic process	biological_process	0.96592	91	Cluster-31803.45055,Cluster-31803.80077,Cluster-31803.68033,Cluster-31803.40957,Cluster-31803.25822,Cluster-31803.4794,Cluster-31803.86747,Cluster-31803.15005,Cluster-31803.54710,Cluster-31803.77576,Cluster-31803.86310,Cluster-31803.69742,Cluster-31803.95642,Cluster-31803.84659,Cluster-31803.40663,Cluster-31803.66591,Cluster-31803.30959,Cluster-31803.79056,Cluster-31803.25826,Cluster-31803.54211,…
GO:0003868	4-hydroxyphenylpyruvate dioxygenase activity	molecular_function	0.96592	2	Cluster-31803.15741,Cluster-31803.32149
GO:0050776	regulation of immune response	biological_process	0.96592	5	Cluster-31803.45055,Cluster-31803.41140,Cluster-31803.27182,Cluster-31803.71701,Cluster-31803.81410
GO:0005976	polysaccharide metabolic process	biological_process	0.96592	14	Cluster-31803.21942,Cluster-31803.52620,Cluster-31803.51248,Cluster-31803.20998,Cluster-31803.62621,Cluster-31803.103378,Cluster-31803.64540,Cluster-31803.39118,Cluster-31803.95433,Cluster-31803.52629,Cluster-31803.74549,Cluster-31803.26197,Cluster-31803.103379,Cluster-31803.72674
GO:0072524	pyridine-containing compound metabolic process	biological_process	0.96592	20	Cluster-31803.56331,Cluster-31803.59602,Cluster-31803.46994,Cluster-31803.102530,Cluster-31803.40957,Cluster-31803.71481,Cluster-31803.21942,Cluster-31803.54710,Cluster-31803.77576,Cluster-31803.52297,Cluster-31803.54423,Cluster-31803.46795,Cluster-31803.59222,Cluster-31803.45484,Cluster-31803.44058,Cluster-31803.57530,Cluster-31803.45486,Cluster-31803.54712,Cluster-31803.59214,Cluster-31803.1015…
GO:0008824	cyanate hydratase activity	molecular_function	0.96592	1	Cluster-31803.104927
GO:0006364	rRNA processing	biological_process	0.96592	13	Cluster-31803.102494,Cluster-31803.53455,Cluster-31803.43813,Cluster-31803.25254,Cluster-31803.88081,Cluster-31803.43812,Cluster-31803.53443,Cluster-31803.81384,Cluster-31803.38204,Cluster-31803.13030,Cluster-31803.26592,Cluster-31803.26254,Cluster-31803.39022
GO:0046496	nicotinamide nucleotide metabolic process	biological_process	0.96592	18	Cluster-31803.21942,Cluster-31803.71481,Cluster-31803.77576,Cluster-31803.54710,Cluster-31803.40957,Cluster-31803.59602,Cluster-31803.56331,Cluster-31803.102530,Cluster-31803.46994,Cluster-31803.59214,Cluster-31803.54712,Cluster-31803.101533,Cluster-31803.46795,Cluster-31803.59222,Cluster-31803.57530,Cluster-31803.44058,Cluster-31803.54423,Cluster-31803.52297
GO:0016072	rRNA metabolic process	biological_process	0.96592	13	Cluster-31803.25254,Cluster-31803.102494,Cluster-31803.53455,Cluster-31803.43813,Cluster-31803.43812,Cluster-31803.88081,Cluster-31803.26592,Cluster-31803.26254,Cluster-31803.53443,Cluster-31803.81384,Cluster-31803.38204,Cluster-31803.13030,Cluster-31803.39022
GO:0031344	regulation of cell projection organization	biological_process	0.96592	2	Cluster-31803.25826,Cluster-31803.25822
GO:0060491	regulation of cell projection assembly	biological_process	0.96592	2	Cluster-31803.25822,Cluster-31803.25826
GO:1902115	regulation of organelle assembly	biological_process	0.96592	2	Cluster-31803.25822,Cluster-31803.25826
GO:1902208	regulation of bacterial-type flagellum assembly	biological_process	0.96592	2	Cluster-31803.25826,Cluster-31803.25822
GO:1901264	carbohydrate derivative transport	biological_process	0.96592	3	Cluster-31803.92931,Cluster-31803.40772,Cluster-31803.68945
GO:0004422	hypoxanthine phosphoribosyltransferase activity	molecular_function	0.96592	1	Cluster-31803.102530
GO:0046100	hypoxanthine metabolic process	biological_process	0.96592	1	Cluster-31803.102530
GO:0008272	sulfate transport	biological_process	0.96592	4	Cluster-31803.69139,Cluster-31803.29237,Cluster-31803.43490,Cluster-31803.58329
GO:0015116	sulfate transmembrane transporter activity	molecular_function	0.96592	4	Cluster-31803.69139,Cluster-31803.29237,Cluster-31803.58329,Cluster-31803.43490
GO:0043436	oxoacid metabolic process	biological_process	0.98212	92	Cluster-31803.28776,Cluster-31803.98072,Cluster-31803.71782,Cluster-31803.58329,Cluster-31803.87059,Cluster-31803.33595,Cluster-31803.62621,Cluster-31803.54712,Cluster-31803.44038,Cluster-31803.72549,Cluster-31803.84665,Cluster-31803.93526,Cluster-31803.64574,Cluster-31803.77209,Cluster-31803.82070,Cluster-31803.98485,Cluster-31803.21601,Cluster-31803.100522,Cluster-31803.69518,Cluster-31803.2431…
GO:0032259	methylation	biological_process	0.98212	20	Cluster-31803.31080,Cluster-31803.13030,Cluster-31803.81384,Cluster-31803.75445,Cluster-31803.107579,Cluster-31803.71782,Cluster-31803.25254,Cluster-31803.65630,Cluster-31803.79448,Cluster-31803.18502,Cluster-31803.67031,Cluster-31803.87027,Cluster-31803.38204,Cluster-31803.39022,Cluster-31803.9498,Cluster-31803.79266,Cluster-31803.102494,Cluster-31803.106125,Cluster-31803.88081,Cluster-31803.512…
GO:1901682	sulfur compound transmembrane transporter activity	molecular_function	0.98212	4	Cluster-31803.43490,Cluster-31803.58329,Cluster-31803.69139,Cluster-31803.29237
GO:0000313	organellar ribosome	cellular_component	0.98212	2	Cluster-31803.51447,Cluster-31803.42524
GO:0005761	mitochondrial ribosome	cellular_component	0.98212	2	Cluster-31803.42524,Cluster-31803.51447
GO:0016879	ligase activity, forming carbon-nitrogen bonds	molecular_function	0.98212	13	Cluster-31803.35115,Cluster-31803.38042,Cluster-31803.72329,Cluster-31803.69518,Cluster-31803.91464,Cluster-31803.29590,Cluster-31803.29294,Cluster-31803.101505,Cluster-31803.41549,Cluster-31803.51447,Cluster-31803.63296,Cluster-31803.81751,Cluster-31803.54211
GO:0019199	transmembrane receptor protein kinase activity	molecular_function	0.98212	5	Cluster-31803.75445,Cluster-31803.79266,Cluster-31803.9845,Cluster-31803.81384,Cluster-31803.65630
GO:0019362	pyridine nucleotide metabolic process	biological_process	0.98212	18	Cluster-31803.52297,Cluster-31803.54423,Cluster-31803.59222,Cluster-31803.46795,Cluster-31803.44058,Cluster-31803.57530,Cluster-31803.54712,Cluster-31803.59214,Cluster-31803.101533,Cluster-31803.56331,Cluster-31803.59602,Cluster-31803.46994,Cluster-31803.102530,Cluster-31803.40957,Cluster-31803.71481,Cluster-31803.21942,Cluster-31803.54710,Cluster-31803.77576
GO:0042754	negative regulation of circadian rhythm	biological_process	0.98212	2	Cluster-31803.94002,Cluster-31803.101311
GO:0065008	regulation of biological quality	biological_process	0.98212	46	Cluster-31803.46675,Cluster-31803.67031,Cluster-31803.54240,Cluster-31803.71701,Cluster-31803.66143,Cluster-31803.23780,Cluster-31803.95747,Cluster-31803.64541,Cluster-31803.56206,Cluster-31803.8555,Cluster-31803.16576,Cluster-31803.46305,Cluster-31803.45694,Cluster-31803.30091,Cluster-31803.54236,Cluster-31803.59210,Cluster-31803.41140,Cluster-31803.70281,Cluster-31803.43520,Cluster-31803.45483,…
GO:0018144	RNA-protein covalent cross-linking	biological_process	0.98212	2	Cluster-31803.45055,Cluster-31803.100458
GO:0055114	oxidation-reduction process	biological_process	0.98212	107	Cluster-31803.98485,Cluster-31803.53354,Cluster-31803.24311,Cluster-31803.57662,Cluster-31803.96909,Cluster-31803.29543,Cluster-31803.55243,Cluster-31803.66143,Cluster-31803.63151,Cluster-31803.97746,Cluster-31803.62104,Cluster-31803.54712,Cluster-31803.33595,Cluster-31803.100793,Cluster-31803.72549,Cluster-31803.64597,Cluster-31803.98072,Cluster-31803.30686,Cluster-31803.45484,Cluster-31803.7178…
GO:0042752	regulation of circadian rhythm	biological_process	0.98212	2	Cluster-31803.94002,Cluster-31803.101311
GO:0004022	alcohol dehydrogenase (NAD) activity	molecular_function	0.98212	3	Cluster-31803.21555,Cluster-31803.98965,Cluster-31803.26296
GO:0015945	methanol metabolic process	biological_process	0.98212	3	Cluster-31803.98965,Cluster-31803.26296,Cluster-31803.21555
GO:0015946	methanol oxidation	biological_process	0.98212	3	Cluster-31803.26296,Cluster-31803.98965,Cluster-31803.21555
GO:0009311	oligosaccharide metabolic process	biological_process	0.98285	15	Cluster-31803.72674,Cluster-31803.26197,Cluster-31803.103379,Cluster-31803.39022,Cluster-31803.52629,Cluster-31803.95433,Cluster-31803.74549,Cluster-31803.41446,Cluster-31803.103378,Cluster-31803.64540,Cluster-31803.62621,Cluster-31803.51248,Cluster-31803.20998,Cluster-31803.21942,Cluster-31803.52620
GO:0034308	primary alcohol metabolic process	biological_process	0.98285	3	Cluster-31803.98965,Cluster-31803.26296,Cluster-31803.21555
GO:0007532	regulation of mating-type specific transcription, DNA-templated	biological_process	0.98285	2	Cluster-31803.72458,Cluster-31803.44221
GO:0008301	DNA binding, bending	molecular_function	0.98285	2	Cluster-31803.44221,Cluster-31803.72458
GO:0045895	positive regulation of mating-type specific transcription, DNA-templated	biological_process	0.98285	2	Cluster-31803.44221,Cluster-31803.72458
GO:0017004	cytochrome complex assembly	biological_process	0.98285	7	Cluster-31803.79185,Cluster-31803.24020,Cluster-31803.102830,Cluster-31803.61089,Cluster-31803.42009,Cluster-31803.55475,Cluster-31803.10715
GO:0009439	cyanate metabolic process	biological_process	0.98285	1	Cluster-31803.104927
GO:0030493	bacteriochlorophyll metabolic process	biological_process	0.98285	2	Cluster-31803.70958,Cluster-31803.76092
GO:0030494	bacteriochlorophyll biosynthetic process	biological_process	0.98285	2	Cluster-31803.76092,Cluster-31803.70958
GO:1901605	alpha-amino acid metabolic process	biological_process	0.98285	62	Cluster-31803.95642,Cluster-31803.69742,Cluster-31803.54710,Cluster-31803.86310,Cluster-31803.15005,Cluster-31803.86747,Cluster-31803.4794,Cluster-31803.25822,Cluster-31803.101505,Cluster-31803.68033,Cluster-31803.57725,Cluster-31803.45055,Cluster-31803.38855,Cluster-31803.80840,Cluster-31803.15741,Cluster-31803.45498,Cluster-31803.38042,Cluster-31803.76193,Cluster-31803.25539,Cluster-31803.32149…
GO:0016413	O-acetyltransferase activity	molecular_function	0.98285	3	Cluster-31803.38855,Cluster-31803.9888,Cluster-31803.69742
GO:0015291	secondary active transmembrane transporter activity	molecular_function	0.98285	13	Cluster-31803.59214,Cluster-31803.36429,Cluster-31803.74434,Cluster-31803.101533,Cluster-31803.59222,Cluster-31803.69005,Cluster-31803.44058,Cluster-31803.61888,Cluster-31803.23780,Cluster-31803.92232,Cluster-31803.31171,Cluster-31803.56331,Cluster-31803.16576
GO:0055080	cation homeostasis	biological_process	0.98285	13	Cluster-31803.16576,Cluster-31803.68814,Cluster-31803.93098,Cluster-31803.54240,Cluster-31803.54236,Cluster-31803.45483,Cluster-31803.23780,Cluster-31803.35654,Cluster-31803.44058,Cluster-31803.69005,Cluster-31803.74434,Cluster-31803.72549,Cluster-31803.54463
GO:0098771	inorganic ion homeostasis	biological_process	0.98285	13	Cluster-31803.16576,Cluster-31803.68814,Cluster-31803.54240,Cluster-31803.93098,Cluster-31803.54236,Cluster-31803.35654,Cluster-31803.45483,Cluster-31803.23780,Cluster-31803.44058,Cluster-31803.69005,Cluster-31803.74434,Cluster-31803.72549,Cluster-31803.54463
GO:0004765	shikimate kinase activity	molecular_function	0.98285	1	Cluster-31803.107323
GO:0050801	ion homeostasis	biological_process	0.98285	13	Cluster-31803.44058,Cluster-31803.69005,Cluster-31803.74434,Cluster-31803.72549,Cluster-31803.54463,Cluster-31803.16576,Cluster-31803.68814,Cluster-31803.54240,Cluster-31803.93098,Cluster-31803.54236,Cluster-31803.23780,Cluster-31803.45483,Cluster-31803.35654
GO:0051213	dioxygenase activity	molecular_function	1	7	Cluster-31803.46305,Cluster-31803.32149,Cluster-31803.63895,Cluster-31803.96358,Cluster-31803.67925,Cluster-31803.57451,Cluster-31803.15741
GO:0044281	small molecule metabolic process	biological_process	1	145	Cluster-31803.108237,Cluster-31803.25539,Cluster-31803.71264,Cluster-31803.59222,Cluster-31803.38042,Cluster-31803.72329,Cluster-31803.69296,Cluster-31803.64167,Cluster-31803.48689,Cluster-31803.52629,Cluster-31803.101505,Cluster-31803.46994,Cluster-31803.42219,Cluster-31803.54423,Cluster-31803.59210,Cluster-31803.77209,Cluster-31803.48726,Cluster-31803.64574,Cluster-31803.84665,Cluster-31803.335…
GO:0004636	phosphoribosyl-ATP diphosphatase activity	molecular_function	1	1	Cluster-31803.80840
GO:0004411	homogentisate 1,2-dioxygenase activity	molecular_function	1	2	Cluster-31803.46305,Cluster-31803.96358
GO:0006559	L-phenylalanine catabolic process	biological_process	1	2	Cluster-31803.46305,Cluster-31803.96358
GO:1902222	erythrose 4-phosphate/phosphoenolpyruvate family amino acid catabolic process	biological_process	1	2	Cluster-31803.46305,Cluster-31803.96358
GO:0046488	phosphatidylinositol metabolic process	biological_process	1	11	Cluster-31803.100697,Cluster-31803.36206,Cluster-31803.32535,Cluster-31803.35115,Cluster-31803.14138,Cluster-31803.65440,Cluster-31803.105902,Cluster-31803.64574,Cluster-31803.77209,Cluster-31803.41549,Cluster-31803.95022
GO:0016759	cellulose synthase activity	molecular_function	1	2	Cluster-31803.103378,Cluster-31803.103379
GO:0016760	cellulose synthase (UDP-forming) activity	molecular_function	1	2	Cluster-31803.103379,Cluster-31803.103378
GO:0045300	acyl-[acyl-carrier-protein] desaturase activity	molecular_function	1	2	Cluster-31803.15683,Cluster-31803.48689
GO:0031167	rRNA methylation	biological_process	1	5	Cluster-31803.39022,Cluster-31803.38204,Cluster-31803.81384,Cluster-31803.102494,Cluster-31803.25254
GO:0044710	single-organism metabolic process	biological_process	1	255	Cluster-31803.26998,Cluster-31803.69335,Cluster-31803.45055,Cluster-31803.43048,Cluster-31803.37373,Cluster-31803.63895,Cluster-31803.52096,Cluster-31803.67042,Cluster-31803.27182,Cluster-31803.40957,Cluster-31803.69005,Cluster-31803.77576,Cluster-31803.86310,Cluster-31803.95642,Cluster-31803.23463,Cluster-31803.15979,Cluster-31803.69742,Cluster-31803.66591,Cluster-31803.41549,Cluster-31803.84659…
GO:0009870	defense response signaling pathway, resistance gene-dependent	biological_process	1	1	Cluster-31803.27182
GO:0004702	receptor signaling protein serine/threonine kinase activity	molecular_function	1	2	Cluster-31803.15005,Cluster-31803.95642
GO:0004707	MAP kinase activity	molecular_function	1	2	Cluster-31803.15005,Cluster-31803.95642
GO:0048046	apoplast	cellular_component	1	2	Cluster-31803.67069,Cluster-31803.46994
GO:0009250	glucan biosynthetic process	biological_process	1	5	Cluster-31803.39118,Cluster-31803.74549,Cluster-31803.95433,Cluster-31803.103378,Cluster-31803.103379
GO:0032041	NAD-dependent histone deacetylase activity (H3-K14 specific)	molecular_function	1	2	Cluster-31803.78451,Cluster-31803.78456
GO:0046969	NAD-dependent histone deacetylase activity (H3-K9 specific)	molecular_function	1	2	Cluster-31803.78451,Cluster-31803.78456
GO:0046970	NAD-dependent histone deacetylase activity (H4-K16 specific)	molecular_function	1	2	Cluster-31803.78451,Cluster-31803.78456
GO:0070932	histone H3 deacetylation	biological_process	1	2	Cluster-31803.78456,Cluster-31803.78451
GO:0070933	histone H4 deacetylation	biological_process	1	2	Cluster-31803.78451,Cluster-31803.78456
GO:0097372	NAD-dependent histone deacetylase activity (H3-K18 specific)	molecular_function	1	2	Cluster-31803.78456,Cluster-31803.78451
GO:0010212	response to ionizing radiation	biological_process	1	3	Cluster-31803.44038,Cluster-31803.45694,Cluster-31803.46305
GO:0004013	adenosylhomocysteinase activity	molecular_function	1	2	Cluster-31803.37600,Cluster-31803.4794
GO:0016801	hydrolase activity, acting on ether bonds	molecular_function	1	2	Cluster-31803.4794,Cluster-31803.37600
GO:0016802	trialkylsulfonium hydrolase activity	molecular_function	1	2	Cluster-31803.37600,Cluster-31803.4794
GO:0006733	oxidoreduction coenzyme metabolic process	biological_process	1	20	Cluster-31803.55475,Cluster-31803.54423,Cluster-31803.52297,Cluster-31803.101533,Cluster-31803.59214,Cluster-31803.54712,Cluster-31803.57530,Cluster-31803.44058,Cluster-31803.46795,Cluster-31803.59222,Cluster-31803.40957,Cluster-31803.102530,Cluster-31803.46994,Cluster-31803.56331,Cluster-31803.59602,Cluster-31803.69005,Cluster-31803.77576,Cluster-31803.54710,Cluster-31803.21942,Cluster-31803.714…
GO:0072348	sulfur compound transport	biological_process	1	4	Cluster-31803.43490,Cluster-31803.58329,Cluster-31803.29237,Cluster-31803.69139
GO:0051156	glucose 6-phosphate metabolic process	biological_process	1	13	Cluster-31803.52297,Cluster-31803.56331,Cluster-31803.102530,Cluster-31803.54423,Cluster-31803.21942,Cluster-31803.46795,Cluster-31803.59222,Cluster-31803.77576,Cluster-31803.54710,Cluster-31803.44058,Cluster-31803.59214,Cluster-31803.54712,Cluster-31803.101533
GO:0048584	positive regulation of response to stimulus	biological_process	1	7	Cluster-31803.41140,Cluster-31803.27182,Cluster-31803.71701,Cluster-31803.81410,Cluster-31803.15545,Cluster-31803.45055,Cluster-31803.38204
GO:0048878	chemical homeostasis	biological_process	1	13	Cluster-31803.44058,Cluster-31803.69005,Cluster-31803.72549,Cluster-31803.54463,Cluster-31803.74434,Cluster-31803.93098,Cluster-31803.54240,Cluster-31803.16576,Cluster-31803.68814,Cluster-31803.35654,Cluster-31803.45483,Cluster-31803.23780,Cluster-31803.54236
GO:0004585	ornithine carbamoyltransferase activity	molecular_function	1	1	Cluster-31803.30959
GO:0009348	ornithine carbamoyltransferase complex	cellular_component	1	1	Cluster-31803.30959
GO:0042744	hydrogen peroxide catabolic process	biological_process	1	1	Cluster-31803.64574
GO:0007605	sensory perception of sound	biological_process	1	1	Cluster-31803.9120
GO:0050954	sensory perception of mechanical stimulus	biological_process	1	1	Cluster-31803.9120
GO:0031078	histone deacetylase activity (H3-K14 specific)	molecular_function	1	2	Cluster-31803.78456,Cluster-31803.78451
GO:0032129	histone deacetylase activity (H3-K9 specific)	molecular_function	1	2	Cluster-31803.78451,Cluster-31803.78456
GO:0008984	protein-glutamate methylesterase activity	molecular_function	1	1	Cluster-31803.105582
GO:0051723	protein methylesterase activity	molecular_function	1	1	Cluster-31803.105582
GO:0009532	plastid stroma	cellular_component	1	2	Cluster-31803.67069,Cluster-31803.24959
GO:0009570	chloroplast stroma	cellular_component	1	2	Cluster-31803.67069,Cluster-31803.24959
GO:0003935	GTP cyclohydrolase II activity	molecular_function	1	1	Cluster-31803.88544
GO:0043168	anion binding	molecular_function	1	178	Cluster-31803.59464,Cluster-31803.54524,Cluster-31803.35115,Cluster-31803.53273,Cluster-31803.61344,Cluster-31803.91464,Cluster-31803.105483,Cluster-31803.85230,Cluster-31803.80077,Cluster-31803.68033,Cluster-31803.55859,Cluster-31803.15005,Cluster-31803.86747,Cluster-31803.44058,Cluster-31803.58061,Cluster-31803.102817,Cluster-31803.72892,Cluster-31803.65426,Cluster-31803.36923,Cluster-31803.292…
GO:0016833	oxo-acid-lyase activity	molecular_function	1	4	Cluster-31803.42029,Cluster-31803.58329,Cluster-31803.35115,Cluster-31803.41549
GO:0009628	response to abiotic stimulus	biological_process	1	8	Cluster-31803.67069,Cluster-31803.91237,Cluster-31803.44038,Cluster-31803.101354,Cluster-31803.48074,Cluster-31803.46305,Cluster-31803.46994,Cluster-31803.45694
GO:0016575	histone deacetylation	biological_process	1	2	Cluster-31803.78456,Cluster-31803.78451
GO:0034739	histone deacetylase activity (H4-K16 specific)	molecular_function	1	2	Cluster-31803.78456,Cluster-31803.78451
GO:0000723	telomere maintenance	biological_process	1	5	Cluster-31803.46305,Cluster-31803.45694,Cluster-31803.44038,Cluster-31803.23170,Cluster-31803.70281
GO:0032200	telomere organization	biological_process	1	5	Cluster-31803.44038,Cluster-31803.70281,Cluster-31803.23170,Cluster-31803.45694,Cluster-31803.46305
GO:0060249	anatomical structure homeostasis	biological_process	1	5	Cluster-31803.70281,Cluster-31803.23170,Cluster-31803.44038,Cluster-31803.45694,Cluster-31803.46305
GO:0006542	glutamine biosynthetic process	biological_process	1	2	Cluster-31803.69518,Cluster-31803.54211
GO:0042743	hydrogen peroxide metabolic process	biological_process	1	1	Cluster-31803.64574
GO:0003987	acetate-CoA ligase activity	molecular_function	1	2	Cluster-31803.59602,Cluster-31803.40957
GO:0006085	acetyl-CoA biosynthetic process	biological_process	1	2	Cluster-31803.59602,Cluster-31803.40957
GO:0016208	AMP binding	molecular_function	1	2	Cluster-31803.59602,Cluster-31803.40957
GO:0019427	acetyl-CoA biosynthetic process from acetate	biological_process	1	2	Cluster-31803.59602,Cluster-31803.40957
GO:0000118	histone deacetylase complex	cellular_component	1	2	Cluster-31803.78451,Cluster-31803.78456
GO:0004407	histone deacetylase activity	molecular_function	1	2	Cluster-31803.78451,Cluster-31803.78456
GO:0017136	NAD-dependent histone deacetylase activity	molecular_function	1	2	Cluster-31803.78451,Cluster-31803.78456
GO:0033558	protein deacetylase activity	molecular_function	1	2	Cluster-31803.78451,Cluster-31803.78456
GO:0034979	NAD-dependent protein deacetylase activity	molecular_function	1	2	Cluster-31803.78451,Cluster-31803.78456
GO:0004151	dihydroorotase activity	molecular_function	1	1	Cluster-31803.73246
GO:1901505	carbohydrate derivative transporter activity	molecular_function	1	3	Cluster-31803.68945,Cluster-31803.40772,Cluster-31803.92931
GO:0000077	DNA damage checkpoint	biological_process	1	4	Cluster-31803.44038,Cluster-31803.45694,Cluster-31803.23749,Cluster-31803.46305
GO:0031570	DNA integrity checkpoint	biological_process	1	4	Cluster-31803.44038,Cluster-31803.45694,Cluster-31803.46305,Cluster-31803.23749
GO:0006476	protein deacetylation	biological_process	1	2	Cluster-31803.78451,Cluster-31803.78456
GO:0035601	protein deacylation	biological_process	1	2	Cluster-31803.78456,Cluster-31803.78451
GO:0098732	macromolecule deacylation	biological_process	1	2	Cluster-31803.78456,Cluster-31803.78451
GO:0006739	NADP metabolic process	biological_process	1	13	Cluster-31803.102530,Cluster-31803.46994,Cluster-31803.56331,Cluster-31803.52297,Cluster-31803.54423,Cluster-31803.44058,Cluster-31803.54710,Cluster-31803.77576,Cluster-31803.46795,Cluster-31803.59222,Cluster-31803.101533,Cluster-31803.54712,Cluster-31803.59214
GO:0004540	ribonuclease activity	molecular_function	1	10	Cluster-31803.35115,Cluster-31803.36831,Cluster-31803.7700,Cluster-31803.66090,Cluster-31803.32222,Cluster-31803.74308,Cluster-31803.27054,Cluster-31803.46675,Cluster-31803.41549,Cluster-31803.52096
GO:0006591	ornithine metabolic process	biological_process	1	2	Cluster-31803.30959,Cluster-31803.21601
GO:0035384	thioester biosynthetic process	biological_process	1	2	Cluster-31803.40957,Cluster-31803.59602
GO:0071616	acyl-CoA biosynthetic process	biological_process	1	2	Cluster-31803.40957,Cluster-31803.59602
GO:0016041	glutamate synthase (ferredoxin) activity	molecular_function	1	1	Cluster-31803.67069
GO:0016643	oxidoreductase activity, acting on the CH-NH2 group of donors, iron-sulfur protein as acceptor	molecular_function	1	1	Cluster-31803.67069
GO:0080114	positive regulation of glycine hydroxymethyltransferase activity	biological_process	1	1	Cluster-31803.67069
GO:0006081	cellular aldehyde metabolic process	biological_process	1	16	Cluster-31803.52297,Cluster-31803.54423,Cluster-31803.45484,Cluster-31803.46795,Cluster-31803.59222,Cluster-31803.44058,Cluster-31803.59214,Cluster-31803.54712,Cluster-31803.45486,Cluster-31803.58329,Cluster-31803.101533,Cluster-31803.56331,Cluster-31803.102530,Cluster-31803.4794,Cluster-31803.77576,Cluster-31803.54710
GO:0051274	beta-glucan biosynthetic process	biological_process	1	3	Cluster-31803.103379,Cluster-31803.103378,Cluster-31803.39118
GO:0007530	sex determination	biological_process	1	2	Cluster-31803.72458,Cluster-31803.44221
GO:0007531	mating type determination	biological_process	1	2	Cluster-31803.44221,Cluster-31803.72458
GO:0045165	cell fate commitment	biological_process	1	2	Cluster-31803.72458,Cluster-31803.44221
GO:0006637	acyl-CoA metabolic process	biological_process	1	4	Cluster-31803.59602,Cluster-31803.80077,Cluster-31803.63151,Cluster-31803.40957
GO:0035383	thioester metabolic process	biological_process	1	4	Cluster-31803.63151,Cluster-31803.40957,Cluster-31803.80077,Cluster-31803.59602
GO:0006816	calcium ion transport	biological_process	1	9	Cluster-31803.100697,Cluster-31803.54463,Cluster-31803.93098,Cluster-31803.54240,Cluster-31803.54236,Cluster-31803.45483,Cluster-31803.105902,Cluster-31803.35654,Cluster-31803.90956
GO:0009225	nucleotide-sugar metabolic process	biological_process	1	3	Cluster-31803.43048,Cluster-31803.103379,Cluster-31803.103378
GO:0019087	transformation of host cell by virus	biological_process	1	4	Cluster-31803.45498,Cluster-31803.41140,Cluster-31803.71701,Cluster-31803.62576
GO:0022904	respiratory electron transport chain	biological_process	1	11	Cluster-31803.64612,Cluster-31803.57662,Cluster-31803.64602,Cluster-31803.64601,Cluster-31803.64605,Cluster-31803.48966,Cluster-31803.64597,Cluster-31803.64617,Cluster-31803.72674,Cluster-31803.55475,Cluster-31803.64596
GO:0006874	cellular calcium ion homeostasis	biological_process	1	7	Cluster-31803.45483,Cluster-31803.54463,Cluster-31803.35654,Cluster-31803.54236,Cluster-31803.93098,Cluster-31803.54240,Cluster-31803.68814
GO:0055074	calcium ion homeostasis	biological_process	1	7	Cluster-31803.54236,Cluster-31803.35654,Cluster-31803.45483,Cluster-31803.54463,Cluster-31803.68814,Cluster-31803.54240,Cluster-31803.93098
GO:0072503	cellular divalent inorganic cation homeostasis	biological_process	1	7	Cluster-31803.54236,Cluster-31803.54463,Cluster-31803.45483,Cluster-31803.35654,Cluster-31803.68814,Cluster-31803.93098,Cluster-31803.54240
GO:0072507	divalent inorganic cation homeostasis	biological_process	1	7	Cluster-31803.54236,Cluster-31803.45483,Cluster-31803.54463,Cluster-31803.35654,Cluster-31803.68814,Cluster-31803.54240,Cluster-31803.93098
GO:0006635	fatty acid beta-oxidation	biological_process	1	3	Cluster-31803.63151,Cluster-31803.76193,Cluster-31803.80077
GO:0009062	fatty acid catabolic process	biological_process	1	3	Cluster-31803.80077,Cluster-31803.76193,Cluster-31803.63151
GO:0019395	fatty acid oxidation	biological_process	1	3	Cluster-31803.76193,Cluster-31803.80077,Cluster-31803.63151
GO:0034440	lipid oxidation	biological_process	1	3	Cluster-31803.63151,Cluster-31803.80077,Cluster-31803.76193
GO:0016891	endoribonuclease activity, producing 5'-phosphomonoesters	molecular_function	1	6	Cluster-31803.74308,Cluster-31803.32222,Cluster-31803.41549,Cluster-31803.66090,Cluster-31803.7700,Cluster-31803.35115
GO:0050661	NADP binding	molecular_function	1	6	Cluster-31803.69335,Cluster-31803.54710,Cluster-31803.52297,Cluster-31803.62104,Cluster-31803.66090,Cluster-31803.54712
GO:0004801	sedoheptulose-7-phosphate:D-glyceraldehyde-3-phosphate glyceronetransferase activity	molecular_function	1	1	Cluster-31803.54423
GO:0006098	pentose-phosphate shunt	biological_process	1	12	Cluster-31803.101533,Cluster-31803.54712,Cluster-31803.59214,Cluster-31803.44058,Cluster-31803.54710,Cluster-31803.77576,Cluster-31803.46795,Cluster-31803.59222,Cluster-31803.54423,Cluster-31803.102530,Cluster-31803.56331,Cluster-31803.52297
GO:0044262	cellular carbohydrate metabolic process	biological_process	1	20	Cluster-31803.39118,Cluster-31803.52629,Cluster-31803.103379,Cluster-31803.21942,Cluster-31803.54710,Cluster-31803.77576,Cluster-31803.103378,Cluster-31803.52297,Cluster-31803.74549,Cluster-31803.95433,Cluster-31803.26197,Cluster-31803.72674,Cluster-31803.46795,Cluster-31803.52620,Cluster-31803.20998,Cluster-31803.51248,Cluster-31803.54712,Cluster-31803.62621,Cluster-31803.64540,Cluster-31803.583…
GO:0034470	ncRNA processing	biological_process	1	38	Cluster-31803.29294,Cluster-31803.91701,Cluster-31803.31080,Cluster-31803.81384,Cluster-31803.41549,Cluster-31803.25254,Cluster-31803.66090,Cluster-31803.56122,Cluster-31803.43813,Cluster-31803.41446,Cluster-31803.26592,Cluster-31803.29666,Cluster-31803.55044,Cluster-31803.52096,Cluster-31803.39022,Cluster-31803.35115,Cluster-31803.41445,Cluster-31803.54524,Cluster-31803.7700,Cluster-31803.102494…
GO:0009853	photorespiration	biological_process	1	1	Cluster-31803.67069
GO:0002682	regulation of immune system process	biological_process	1	5	Cluster-31803.71701,Cluster-31803.81410,Cluster-31803.41140,Cluster-31803.27182,Cluster-31803.45055
GO:0010181	FMN binding	molecular_function	1	5	Cluster-31803.45486,Cluster-31803.103517,Cluster-31803.72213,Cluster-31803.45484,Cluster-31803.97746
GO:0030488	tRNA methylation	biological_process	1	3	Cluster-31803.18502,Cluster-31803.51240,Cluster-31803.31080
GO:0031515	tRNA (m1A) methyltransferase complex	cellular_component	1	3	Cluster-31803.18502,Cluster-31803.51240,Cluster-31803.31080
GO:0034708	methyltransferase complex	cellular_component	1	3	Cluster-31803.31080,Cluster-31803.51240,Cluster-31803.18502
GO:0043527	tRNA methyltransferase complex	cellular_component	1	3	Cluster-31803.51240,Cluster-31803.18502,Cluster-31803.31080
GO:0016570	histone modification	biological_process	1	6	Cluster-31803.45694,Cluster-31803.78456,Cluster-31803.46305,Cluster-31803.27182,Cluster-31803.44038,Cluster-31803.78451
GO:0019682	glyceraldehyde-3-phosphate metabolic process	biological_process	1	12	Cluster-31803.77576,Cluster-31803.54710,Cluster-31803.44058,Cluster-31803.46795,Cluster-31803.59222,Cluster-31803.101533,Cluster-31803.59214,Cluster-31803.54712,Cluster-31803.102530,Cluster-31803.52297,Cluster-31803.56331,Cluster-31803.54423
GO:0001527	microfibril	cellular_component	1	1	Cluster-31803.31213
GO:0043205	fibril	cellular_component	1	1	Cluster-31803.31213
GO:0044420	extracellular matrix component	cellular_component	1	1	Cluster-31803.31213
GO:0006040	amino sugar metabolic process	biological_process	1	5	Cluster-31803.59214,Cluster-31803.59222,Cluster-31803.56331,Cluster-31803.94898,Cluster-31803.9120
GO:0050532	2-phosphosulfolactate phosphatase activity	molecular_function	1	1	Cluster-31803.47799
GO:0016569	covalent chromatin modification	biological_process	1	6	Cluster-31803.45694,Cluster-31803.78456,Cluster-31803.46305,Cluster-31803.27182,Cluster-31803.44038,Cluster-31803.78451
GO:0030244	cellulose biosynthetic process	biological_process	1	2	Cluster-31803.103379,Cluster-31803.103378
GO:0034660	ncRNA metabolic process	biological_process	1	45	Cluster-31803.51122,Cluster-31803.38204,Cluster-31803.46675,Cluster-31803.79189,Cluster-31803.87789,Cluster-31803.51240,Cluster-31803.107323,Cluster-31803.88081,Cluster-31803.43812,Cluster-31803.30779,Cluster-31803.48726,Cluster-31803.13030,Cluster-31803.53443,Cluster-31803.26254,Cluster-31803.75298,Cluster-31803.72549,Cluster-31803.18502,Cluster-31803.28776,Cluster-31803.52171,Cluster-31803.4679…
GO:0006732	coenzyme metabolic process	biological_process	1	38	Cluster-31803.71481,Cluster-31803.21942,Cluster-31803.107323,Cluster-31803.51240,Cluster-31803.102530,Cluster-31803.38204,Cluster-31803.56331,Cluster-31803.15455,Cluster-31803.87789,Cluster-31803.37116,Cluster-31803.63151,Cluster-31803.57530,Cluster-31803.46795,Cluster-31803.71782,Cluster-31803.45484,Cluster-31803.18502,Cluster-31803.54712,Cluster-31803.59214,Cluster-31803.77209,Cluster-31803.554…
GO:0008839	4-hydroxy-tetrahydrodipicolinate reductase	molecular_function	1	3	Cluster-31803.25822,Cluster-31803.25826,Cluster-31803.76193
GO:0004521	endoribonuclease activity	molecular_function	1	7	Cluster-31803.41549,Cluster-31803.27054,Cluster-31803.35115,Cluster-31803.7700,Cluster-31803.66090,Cluster-31803.32222,Cluster-31803.74308
GO:0005315	inorganic phosphate transmembrane transporter activity	molecular_function	1	3	Cluster-31803.59222,Cluster-31803.56331,Cluster-31803.59214
GO:0007259	JAK-STAT cascade	biological_process	1	2	Cluster-31803.41140,Cluster-31803.71701
GO:0015066	alpha-amylase inhibitor activity	molecular_function	1	1	Cluster-31803.48726
GO:0008175	tRNA methyltransferase activity	molecular_function	1	6	Cluster-31803.39022,Cluster-31803.18502,Cluster-31803.51240,Cluster-31803.91701,Cluster-31803.46795,Cluster-31803.55044
GO:0004356	glutamate-ammonia ligase activity	molecular_function	1	2	Cluster-31803.69518,Cluster-31803.54211
GO:0006650	glycerophospholipid metabolic process	biological_process	1	11	Cluster-31803.64574,Cluster-31803.77209,Cluster-31803.65440,Cluster-31803.14138,Cluster-31803.105902,Cluster-31803.41549,Cluster-31803.95022,Cluster-31803.100697,Cluster-31803.36206,Cluster-31803.32535,Cluster-31803.35115
GO:0005184	neuropeptide hormone activity	molecular_function	1	4	Cluster-31803.55243,Cluster-31803.61564,Cluster-31803.43254,Cluster-31803.60007
GO:0006873	cellular ion homeostasis	biological_process	1	8	Cluster-31803.54236,Cluster-31803.45483,Cluster-31803.35654,Cluster-31803.68814,Cluster-31803.54240,Cluster-31803.93098,Cluster-31803.54463,Cluster-31803.72549
GO:0006875	cellular metal ion homeostasis	biological_process	1	8	Cluster-31803.72549,Cluster-31803.54463,Cluster-31803.93098,Cluster-31803.54240,Cluster-31803.68814,Cluster-31803.45483,Cluster-31803.35654,Cluster-31803.54236
GO:0030003	cellular cation homeostasis	biological_process	1	8	Cluster-31803.45483,Cluster-31803.35654,Cluster-31803.54236,Cluster-31803.54240,Cluster-31803.93098,Cluster-31803.68814,Cluster-31803.72549,Cluster-31803.54463
GO:0036094	small molecule binding	molecular_function	1	186	Cluster-31803.67675,Cluster-31803.97871,Cluster-31803.55475,Cluster-31803.70202,Cluster-31803.45484,Cluster-31803.59911,Cluster-31803.72549,Cluster-31803.54712,Cluster-31803.6659,Cluster-31803.97746,Cluster-31803.55854,Cluster-31803.55243,Cluster-31803.51447,Cluster-31803.66143,Cluster-31803.51045,Cluster-31803.101418,Cluster-31803.53354,Cluster-31803.81384,Cluster-31803.52297,Cluster-31803.41973…
GO:0072329	monocarboxylic acid catabolic process	biological_process	1	3	Cluster-31803.80077,Cluster-31803.76193,Cluster-31803.63151
GO:0061695	transferase complex, transferring phosphorus-containing groups	cellular_component	1	46	Cluster-31803.71701,Cluster-31803.51719,Cluster-31803.65414,Cluster-31803.39118,Cluster-31803.23749,Cluster-31803.61564,Cluster-31803.64617,Cluster-31803.31069,Cluster-31803.21799,Cluster-31803.55854,Cluster-31803.100458,Cluster-31803.15368,Cluster-31803.64612,Cluster-31803.46340,Cluster-31803.64605,Cluster-31803.45483,Cluster-31803.41140,Cluster-31803.74549,Cluster-31803.93526,Cluster-31803.9787…
GO:0044085	cellular component biogenesis	biological_process	1	66	Cluster-31803.102494,Cluster-31803.79185,Cluster-31803.79832,Cluster-31803.101505,Cluster-31803.96761,Cluster-31803.26592,Cluster-31803.40352,Cluster-31803.62576,Cluster-31803.43813,Cluster-31803.83172,Cluster-31803.77902,Cluster-31803.74462,Cluster-31803.25254,Cluster-31803.42029,Cluster-31803.81384,Cluster-31803.62383,Cluster-31803.41973,Cluster-31803.88081,Cluster-31803.43812,Cluster-31803.695…
GO:0016211	ammonia ligase activity	molecular_function	1	2	Cluster-31803.69518,Cluster-31803.54211
GO:0016880	acid-ammonia (or amide) ligase activity	molecular_function	1	2	Cluster-31803.69518,Cluster-31803.54211
GO:0051536	iron-sulfur cluster binding	molecular_function	1	20	Cluster-31803.83920,Cluster-31803.46795,Cluster-31803.13827,Cluster-31803.69543,Cluster-31803.47594,Cluster-31803.45498,Cluster-31803.93526,Cluster-31803.13030,Cluster-31803.44702,Cluster-31803.67675,Cluster-31803.62383,Cluster-31803.25826,Cluster-31803.79185,Cluster-31803.88081,Cluster-31803.24311,Cluster-31803.61564,Cluster-31803.96966,Cluster-31803.55243,Cluster-31803.63151,Cluster-31803.25822
GO:0051540	metal cluster binding	molecular_function	1	20	Cluster-31803.83920,Cluster-31803.46795,Cluster-31803.13827,Cluster-31803.69543,Cluster-31803.47594,Cluster-31803.45498,Cluster-31803.13030,Cluster-31803.93526,Cluster-31803.67675,Cluster-31803.62383,Cluster-31803.44702,Cluster-31803.25826,Cluster-31803.79185,Cluster-31803.88081,Cluster-31803.24311,Cluster-31803.61564,Cluster-31803.55243,Cluster-31803.96966,Cluster-31803.63151,Cluster-31803.25822
GO:0016423	tRNA (guanine) methyltransferase activity	molecular_function	1	5	Cluster-31803.39022,Cluster-31803.51240,Cluster-31803.46795,Cluster-31803.91701,Cluster-31803.55044
GO:0031369	translation initiation factor binding	molecular_function	1	3	Cluster-31803.62016,Cluster-31803.54317,Cluster-31803.58375
GO:0003887	DNA-directed DNA polymerase activity	molecular_function	1	10	Cluster-31803.39186,Cluster-31803.58329,Cluster-31803.58994,Cluster-31803.100020,Cluster-31803.39821,Cluster-31803.69139,Cluster-31803.55854,Cluster-31803.71701,Cluster-31803.62576,Cluster-31803.41140
GO:0008061	chitin binding	molecular_function	1	7	Cluster-31803.9875,Cluster-31803.91464,Cluster-31803.31214,Cluster-31803.49084,Cluster-31803.77576,Cluster-31803.31213,Cluster-31803.94898
GO:0031120	snRNA pseudouridine synthesis	biological_process	1	1	Cluster-31803.77902
GO:0040031	snRNA modification	biological_process	1	1	Cluster-31803.77902
GO:0016758	transferase activity, transferring hexosyl groups	molecular_function	1	15	Cluster-31803.64563,Cluster-31803.104362,Cluster-31803.103379,Cluster-31803.72674,Cluster-31803.9120,Cluster-31803.52629,Cluster-31803.74549,Cluster-31803.95433,Cluster-31803.35937,Cluster-31803.72656,Cluster-31803.62621,Cluster-31803.103378,Cluster-31803.64540,Cluster-31803.52620,Cluster-31803.58128
GO:0004020	adenylylsulfate kinase activity	molecular_function	1	3	Cluster-31803.64167,Cluster-31803.64155,Cluster-31803.107323
GO:0015858	nucleoside transport	biological_process	1	2	Cluster-31803.40772,Cluster-31803.68945
GO:0003824	catalytic activity	molecular_function	1	433	Cluster-31803.57451,Cluster-31803.69721,Cluster-31803.43021,Cluster-31803.43580,Cluster-31803.89263,Cluster-31803.90461,Cluster-31803.103378,Cluster-31803.74328,Cluster-31803.65414,Cluster-31803.96966,Cluster-31803.79189,Cluster-31803.40725,Cluster-31803.86324,Cluster-31803.72117,Cluster-31803.84316,Cluster-31803.72656,Cluster-31803.75298,Cluster-31803.74434,Cluster-31803.20011,Cluster-31803.1113…
GO:0008026	ATP-dependent helicase activity	molecular_function	1	8	Cluster-31803.19074,Cluster-31803.76770,Cluster-31803.60636,Cluster-31803.53879,Cluster-31803.19072,Cluster-31803.47799,Cluster-31803.35937,Cluster-31803.15588
GO:0070035	purine NTP-dependent helicase activity	molecular_function	1	8	Cluster-31803.53879,Cluster-31803.60636,Cluster-31803.76770,Cluster-31803.19074,Cluster-31803.15588,Cluster-31803.35937,Cluster-31803.47799,Cluster-31803.19072
GO:0048646	anatomical structure formation involved in morphogenesis	biological_process	1	13	Cluster-31803.54463,Cluster-31803.68598,Cluster-31803.41951,Cluster-31803.83110,Cluster-31803.46795,Cluster-31803.74462,Cluster-31803.15545,Cluster-31803.62576,Cluster-31803.54211,Cluster-31803.71701,Cluster-31803.41140,Cluster-31803.45632,Cluster-31803.92817
GO:0000179	rRNA (adenine-N6,N6-)-dimethyltransferase activity	molecular_function	1	1	Cluster-31803.39022
GO:0015716	organic phosphonate transport	biological_process	1	2	Cluster-31803.64842,Cluster-31803.46681
GO:0006305	DNA alkylation	biological_process	1	3	Cluster-31803.102494,Cluster-31803.79448,Cluster-31803.25254
GO:0006306	DNA methylation	biological_process	1	3	Cluster-31803.102494,Cluster-31803.79448,Cluster-31803.25254
GO:0044728	DNA methylation or demethylation	biological_process	1	3	Cluster-31803.102494,Cluster-31803.25254,Cluster-31803.79448
GO:0019069	viral capsid assembly	biological_process	1	4	Cluster-31803.91237,Cluster-31803.54117,Cluster-31803.36206,Cluster-31803.74871
GO:0007051	spindle organization	biological_process	1	3	Cluster-31803.41140,Cluster-31803.71701,Cluster-31803.62576
GO:1901615	organic hydroxy compound metabolic process	biological_process	1	10	Cluster-31803.98965,Cluster-31803.69518,Cluster-31803.45486,Cluster-31803.26296,Cluster-31803.77576,Cluster-31803.21555,Cluster-31803.21942,Cluster-31803.45484,Cluster-31803.9888,Cluster-31803.70281
GO:0000103	sulfate assimilation	biological_process	1	3	Cluster-31803.64167,Cluster-31803.64155,Cluster-31803.107323
GO:0055065	metal ion homeostasis	biological_process	1	8	Cluster-31803.54240,Cluster-31803.93098,Cluster-31803.68814,Cluster-31803.45483,Cluster-31803.35654,Cluster-31803.54236,Cluster-31803.72549,Cluster-31803.54463
GO:0019634	organic phosphonate metabolic process	biological_process	1	2	Cluster-31803.64842,Cluster-31803.46681
GO:0019725	cellular homeostasis	biological_process	1	16	Cluster-31803.64541,Cluster-31803.23463,Cluster-31803.56206,Cluster-31803.8555,Cluster-31803.54240,Cluster-31803.48074,Cluster-31803.64542,Cluster-31803.72549,Cluster-31803.54463,Cluster-31803.68814,Cluster-31803.65426,Cluster-31803.93098,Cluster-31803.54236,Cluster-31803.59210,Cluster-31803.45483,Cluster-31803.35654
GO:0015171	amino acid transmembrane transporter activity	molecular_function	1	4	Cluster-31803.42913,Cluster-31803.70958,Cluster-31803.76092,Cluster-31803.70952
GO:0055082	cellular chemical homeostasis	biological_process	1	8	Cluster-31803.72549,Cluster-31803.54463,Cluster-31803.93098,Cluster-31803.54240,Cluster-31803.68814,Cluster-31803.35654,Cluster-31803.45483,Cluster-31803.54236
GO:0009117	nucleotide metabolic process	biological_process	1	41	Cluster-31803.55475,Cluster-31803.77209,Cluster-31803.81751,Cluster-31803.70958,Cluster-31803.54423,Cluster-31803.48966,Cluster-31803.59214,Cluster-31803.54712,Cluster-31803.57530,Cluster-31803.74400,Cluster-31803.46795,Cluster-31803.71782,Cluster-31803.37116,Cluster-31803.102530,Cluster-31803.56331,Cluster-31803.103378,Cluster-31803.107323,Cluster-31803.47008,Cluster-31803.57662,Cluster-31803.76…
GO:0016667	oxidoreductase activity, acting on a sulfur group of donors	molecular_function	1	10	Cluster-31803.64541,Cluster-31803.76193,Cluster-31803.64542,Cluster-31803.30686,Cluster-31803.8555,Cluster-31803.26296,Cluster-31803.56206,Cluster-31803.48689,Cluster-31803.65426,Cluster-31803.48726
GO:0019637	organophosphate metabolic process	biological_process	1	57	Cluster-31803.42219,Cluster-31803.77576,Cluster-31803.54710,Cluster-31803.35115,Cluster-31803.105902,Cluster-31803.47890,Cluster-31803.103379,Cluster-31803.64842,Cluster-31803.40957,Cluster-31803.46994,Cluster-31803.43048,Cluster-31803.59602,Cluster-31803.48689,Cluster-31803.101533,Cluster-31803.62748,Cluster-31803.45486,Cluster-31803.38042,Cluster-31803.44058,Cluster-31803.25539,Cluster-31803.59…
GO:0006807	nitrogen compound metabolic process	biological_process	1	318	Cluster-31803.54710,Cluster-31803.82992,Cluster-31803.13126,Cluster-31803.24959,Cluster-31803.85230,Cluster-31803.74308,Cluster-31803.53273,Cluster-31803.61344,Cluster-31803.108977,Cluster-31803.86747,Cluster-31803.55859,Cluster-31803.39022,Cluster-31803.101354,Cluster-31803.76193,Cluster-31803.41446,Cluster-31803.65936,Cluster-31803.77933,Cluster-31803.40663,Cluster-31803.44374,Cluster-31803.654…
GO:0040029	regulation of gene expression, epigenetic	biological_process	1	3	Cluster-31803.25254,Cluster-31803.79448,Cluster-31803.102494
GO:0004519	endonuclease activity	molecular_function	1	13	Cluster-31803.30779,Cluster-31803.54117,Cluster-31803.74871,Cluster-31803.41549,Cluster-31803.27054,Cluster-31803.53448,Cluster-31803.74308,Cluster-31803.32222,Cluster-31803.44422,Cluster-31803.7700,Cluster-31803.66090,Cluster-31803.35115,Cluster-31803.101354
GO:0000303	response to superoxide	biological_process	1	1	Cluster-31803.48726
GO:0000305	response to oxygen radical	biological_process	1	1	Cluster-31803.48726
GO:0004791	thioredoxin-disulfide reductase activity	molecular_function	1	1	Cluster-31803.48726
GO:0019430	removal of superoxide radicals	biological_process	1	1	Cluster-31803.48726
GO:0034614	cellular response to reactive oxygen species	biological_process	1	1	Cluster-31803.48726
GO:0071450	cellular response to oxygen radical	biological_process	1	1	Cluster-31803.48726
GO:0071451	cellular response to superoxide	biological_process	1	1	Cluster-31803.48726
GO:1990748	cellular detoxification	biological_process	1	1	Cluster-31803.48726
GO:0006353	DNA-templated transcription, termination	biological_process	1	2	Cluster-31803.58128,Cluster-31803.59210
GO:0004824	lysine-tRNA ligase activity	molecular_function	1	1	Cluster-31803.28776
GO:0006430	lysyl-tRNA aminoacylation	biological_process	1	1	Cluster-31803.28776
GO:0098657	import into cell	biological_process	1	1	Cluster-31803.77751
GO:0051186	cofactor metabolic process	biological_process	1	47	Cluster-31803.107323,Cluster-31803.98485,Cluster-31803.51240,Cluster-31803.71481,Cluster-31803.21942,Cluster-31803.76092,Cluster-31803.33376,Cluster-31803.63151,Cluster-31803.37116,Cluster-31803.56331,Cluster-31803.87789,Cluster-31803.15455,Cluster-31803.102530,Cluster-31803.6659,Cluster-31803.38204,Cluster-31803.18502,Cluster-31803.54712,Cluster-31803.59214,Cluster-31803.46795,Cluster-31803.7178…
GO:0042254	ribosome biogenesis	biological_process	1	36	Cluster-31803.83172,Cluster-31803.43813,Cluster-31803.77902,Cluster-31803.25254,Cluster-31803.42029,Cluster-31803.65936,Cluster-31803.96355,Cluster-31803.81384,Cluster-31803.62383,Cluster-31803.82992,Cluster-31803.53455,Cluster-31803.102494,Cluster-31803.13126,Cluster-31803.79832,Cluster-31803.96761,Cluster-31803.40352,Cluster-31803.108977,Cluster-31803.26592,Cluster-31803.62576,Cluster-31803.390…
GO:0009069	serine family amino acid metabolic process	biological_process	1	22	Cluster-31803.42103,Cluster-31803.95642,Cluster-31803.69742,Cluster-31803.86747,Cluster-31803.15005,Cluster-31803.40265,Cluster-31803.51122,Cluster-31803.68033,Cluster-31803.57725,Cluster-31803.38855,Cluster-31803.87059,Cluster-31803.9845,Cluster-31803.44038,Cluster-31803.71782,Cluster-31803.108237,Cluster-31803.79056,Cluster-31803.66591,Cluster-31803.46305,Cluster-31803.84659,Cluster-31803.84665…
GO:0097159	organic cyclic compound binding	molecular_function	1	295	Cluster-31803.31653,Cluster-31803.26254,Cluster-31803.41140,Cluster-31803.50590,Cluster-31803.15580,Cluster-31803.20011,Cluster-31803.75298,Cluster-31803.72117,Cluster-31803.79189,Cluster-31803.74328,Cluster-31803.76092,Cluster-31803.90461,Cluster-31803.69721,Cluster-31803.29294,Cluster-31803.25826,Cluster-31803.65440,Cluster-31803.44058,Cluster-31803.58061,Cluster-31803.94898,Cluster-31803.80840…
GO:1901363	heterocyclic compound binding	molecular_function	1	295	Cluster-31803.26592,Cluster-31803.42524,Cluster-31803.14245,Cluster-31803.79723,Cluster-31803.64167,Cluster-31803.69296,Cluster-31803.62576,Cluster-31803.42340,Cluster-31803.107832,Cluster-31803.66661,Cluster-31803.44422,Cluster-31803.27054,Cluster-31803.71264,Cluster-31803.72329,Cluster-31803.38042,Cluster-31803.6639,Cluster-31803.67031,Cluster-31803.33359,Cluster-31803.46675,Cluster-31803.75438…
GO:0055086	nucleobase-containing small molecule metabolic process	biological_process	1	64	Cluster-31803.64155,Cluster-31803.39821,Cluster-31803.52297,Cluster-31803.101533,Cluster-31803.25539,Cluster-31803.59222,Cluster-31803.71264,Cluster-31803.38042,Cluster-31803.103379,Cluster-31803.64167,Cluster-31803.59602,Cluster-31803.48689,Cluster-31803.46994,Cluster-31803.73246,Cluster-31803.42219,Cluster-31803.70958,Cluster-31803.54423,Cluster-31803.55475,Cluster-31803.77209,Cluster-31803.487…
GO:0005811	lipid particle	cellular_component	1	2	Cluster-31803.67042,Cluster-31803.88544
GO:0012511	monolayer-surrounded lipid storage body	cellular_component	1	2	Cluster-31803.88544,Cluster-31803.67042
GO:0003756	protein disulfide isomerase activity	molecular_function	1	1	Cluster-31803.30686
GO:0016864	intramolecular oxidoreductase activity, transposing S-S bonds	molecular_function	1	1	Cluster-31803.30686
GO:0016903	oxidoreductase activity, acting on the aldehyde or oxo group of donors	molecular_function	1	8	Cluster-31803.48798,Cluster-31803.55243,Cluster-31803.64155,Cluster-31803.45214,Cluster-31803.61564,Cluster-31803.67675,Cluster-31803.60007,Cluster-31803.48689
GO:0006890	retrograde vesicle-mediated transport, Golgi to ER	biological_process	1	2	Cluster-31803.55854,Cluster-31803.55859
GO:0001682	tRNA 5'-leader removal	biological_process	1	1	Cluster-31803.7700
GO:0000075	cell cycle checkpoint	biological_process	1	6	Cluster-31803.44038,Cluster-31803.52096,Cluster-31803.23749,Cluster-31803.46305,Cluster-31803.23353,Cluster-31803.45694
GO:0035335	peptidyl-tyrosine dephosphorylation	biological_process	1	2	Cluster-31803.75133,Cluster-31803.100522
GO:1901135	carbohydrate derivative metabolic process	biological_process	1	59	Cluster-31803.9120,Cluster-31803.70958,Cluster-31803.14138,Cluster-31803.54423,Cluster-31803.55475,Cluster-31803.77209,Cluster-31803.46795,Cluster-31803.71782,Cluster-31803.36206,Cluster-31803.54317,Cluster-31803.57530,Cluster-31803.74400,Cluster-31803.59214,Cluster-31803.18502,Cluster-31803.54712,Cluster-31803.97049,Cluster-31803.48966,Cluster-31803.56331,Cluster-31803.95022,Cluster-31803.38204,…
GO:0002253	activation of immune response	biological_process	1	2	Cluster-31803.27182,Cluster-31803.45055
GO:0046834	lipid phosphorylation	biological_process	1	3	Cluster-31803.100697,Cluster-31803.105902,Cluster-31803.65440
GO:0046854	phosphatidylinositol phosphorylation	biological_process	1	3	Cluster-31803.100697,Cluster-31803.65440,Cluster-31803.105902
GO:0002115	store-operated calcium entry	biological_process	1	3	Cluster-31803.100697,Cluster-31803.90956,Cluster-31803.105902
GO:0051924	regulation of calcium ion transport	biological_process	1	3	Cluster-31803.90956,Cluster-31803.105902,Cluster-31803.100697
GO:2001256	regulation of store-operated calcium entry	biological_process	1	3	Cluster-31803.100697,Cluster-31803.105902,Cluster-31803.90956
GO:0004252	serine-type endopeptidase activity	molecular_function	1	18	Cluster-31803.40352,Cluster-31803.87481,Cluster-31803.86324,Cluster-31803.23780,Cluster-31803.63151,Cluster-31803.77576,Cluster-31803.22126,Cluster-31803.31416,Cluster-31803.100398,Cluster-31803.43254,Cluster-31803.68814,Cluster-31803.65489,Cluster-31803.45483,Cluster-31803.7833,Cluster-31803.23568,Cluster-31803.48074,Cluster-31803.72213,Cluster-31803.45498
GO:0016226	iron-sulfur cluster assembly	biological_process	1	4	Cluster-31803.83920,Cluster-31803.62383,Cluster-31803.76193,Cluster-31803.46795
GO:0031163	metallo-sulfur cluster assembly	biological_process	1	4	Cluster-31803.83920,Cluster-31803.62383,Cluster-31803.76193,Cluster-31803.46795
GO:0050662	coenzyme binding	molecular_function	1	42	Cluster-31803.40334,Cluster-31803.69721,Cluster-31803.45214,Cluster-31803.29543,Cluster-31803.55243,Cluster-31803.97746,Cluster-31803.79189,Cluster-31803.62104,Cluster-31803.61564,Cluster-31803.72549,Cluster-31803.54712,Cluster-31803.45484,Cluster-31803.46795,Cluster-31803.98072,Cluster-31803.30686,Cluster-31803.43520,Cluster-31803.48726,Cluster-31803.67675,Cluster-31803.43254,Cluster-31803.91464…
GO:0033692	cellular polysaccharide biosynthetic process	biological_process	1	5	Cluster-31803.39118,Cluster-31803.74549,Cluster-31803.95433,Cluster-31803.103379,Cluster-31803.103378
GO:0016857	racemase and epimerase activity, acting on carbohydrates and derivatives	molecular_function	1	3	Cluster-31803.59214,Cluster-31803.59222,Cluster-31803.56331
GO:0009001	serine O-acetyltransferase activity	molecular_function	1	2	Cluster-31803.38855,Cluster-31803.69742
GO:0016412	serine O-acyltransferase activity	molecular_function	1	2	Cluster-31803.38855,Cluster-31803.69742
GO:0071107	response to parathyroid hormone	biological_process	1	2	Cluster-31803.51447,Cluster-31803.29590
GO:0004516	nicotinate phosphoribosyltransferase activity	molecular_function	1	1	Cluster-31803.71481
GO:0019357	nicotinate nucleotide biosynthetic process	biological_process	1	1	Cluster-31803.71481
GO:0004026	alcohol O-acetyltransferase activity	molecular_function	1	1	Cluster-31803.9888
GO:0034318	alcohol O-acyltransferase activity	molecular_function	1	1	Cluster-31803.9888
GO:0032978	protein insertion into membrane from inner side	biological_process	1	1	Cluster-31803.74308
GO:0032979	protein insertion into mitochondrial membrane from inner side	biological_process	1	1	Cluster-31803.74308
GO:0051204	protein insertion into mitochondrial membrane	biological_process	1	1	Cluster-31803.74308
GO:0016405	CoA-ligase activity	molecular_function	1	2	Cluster-31803.40957,Cluster-31803.59602
GO:0016757	transferase activity, transferring glycosyl groups	molecular_function	1	28	Cluster-31803.52620,Cluster-31803.64540,Cluster-31803.97049,Cluster-31803.35937,Cluster-31803.72656,Cluster-31803.62621,Cluster-31803.23170,Cluster-31803.9120,Cluster-31803.95433,Cluster-31803.74549,Cluster-31803.92817,Cluster-31803.72674,Cluster-31803.64563,Cluster-31803.39101,Cluster-31803.104362,Cluster-31803.58128,Cluster-31803.71481,Cluster-31803.103378,Cluster-31803.65639,Cluster-31803.6784…
GO:0019068	virion assembly	biological_process	1	5	Cluster-31803.91237,Cluster-31803.36206,Cluster-31803.54117,Cluster-31803.41973,Cluster-31803.74871
GO:0006817	phosphate ion transport	biological_process	1	3	Cluster-31803.56331,Cluster-31803.59222,Cluster-31803.59214
GO:0016701	oxidoreductase activity, acting on single donors with incorporation of molecular oxygen	molecular_function	1	7	Cluster-31803.96358,Cluster-31803.13827,Cluster-31803.15741,Cluster-31803.57451,Cluster-31803.67925,Cluster-31803.46305,Cluster-31803.32149
GO:0019202	amino acid kinase activity	molecular_function	1	2	Cluster-31803.86747,Cluster-31803.84665
GO:0005544	calcium-dependent phospholipid binding	molecular_function	1	1	Cluster-31803.48689
GO:0022613	ribonucleoprotein complex biogenesis	biological_process	1	36	Cluster-31803.69518,Cluster-31803.74993,Cluster-31803.43812,Cluster-31803.29590,Cluster-31803.88081,Cluster-31803.38204,Cluster-31803.86324,Cluster-31803.82464,Cluster-31803.51447,Cluster-31803.71701,Cluster-31803.26254,Cluster-31803.13030,Cluster-31803.53443,Cluster-31803.91704,Cluster-31803.41140,Cluster-31803.91716,Cluster-31803.13126,Cluster-31803.82992,Cluster-31803.53455,Cluster-31803.10249…
GO:0004809	tRNA (guanine-N2-)-methyltransferase activity	molecular_function	1	2	Cluster-31803.55044,Cluster-31803.91701
GO:0000165	MAPK cascade	biological_process	1	2	Cluster-31803.15005,Cluster-31803.95642
GO:0015297	antiporter activity	molecular_function	1	8	Cluster-31803.101533,Cluster-31803.74434,Cluster-31803.61888,Cluster-31803.44058,Cluster-31803.69005,Cluster-31803.23780,Cluster-31803.16576,Cluster-31803.31171
GO:0006753	nucleoside phosphate metabolic process	biological_process	1	41	Cluster-31803.54712,Cluster-31803.59214,Cluster-31803.48966,Cluster-31803.71782,Cluster-31803.46795,Cluster-31803.57530,Cluster-31803.74400,Cluster-31803.54423,Cluster-31803.70958,Cluster-31803.81751,Cluster-31803.77209,Cluster-31803.55475,Cluster-31803.47008,Cluster-31803.107323,Cluster-31803.103378,Cluster-31803.71481,Cluster-31803.21942,Cluster-31803.57662,Cluster-31803.76092,Cluster-31803.371…
GO:0016021	integral component of membrane	cellular_component	1	139	Cluster-31803.64971,Cluster-31803.88544,Cluster-31803.100697,Cluster-31803.24020,Cluster-31803.23749,Cluster-31803.75438,Cluster-31803.35624,Cluster-31803.23780,Cluster-31803.10715,Cluster-31803.36206,Cluster-31803.51248,Cluster-31803.62959,Cluster-31803.33595,Cluster-31803.58329,Cluster-31803.53448,Cluster-31803.43520,Cluster-31803.45483,Cluster-31803.42009,Cluster-31803.77209,Cluster-31803.7918…
GO:1901677	phosphate transmembrane transporter activity	molecular_function	1	3	Cluster-31803.59222,Cluster-31803.56331,Cluster-31803.59214
GO:0034464	BBSome	cellular_component	1	1	Cluster-31803.74462
GO:0000428	DNA-directed RNA polymerase complex	cellular_component	1	28	Cluster-31803.83180,Cluster-31803.64605,Cluster-31803.7700,Cluster-31803.64612,Cluster-31803.15368,Cluster-31803.46340,Cluster-31803.69296,Cluster-31803.27182,Cluster-31803.51719,Cluster-31803.64617,Cluster-31803.31069,Cluster-31803.21799,Cluster-31803.69982,Cluster-31803.61564,Cluster-31803.39118,Cluster-31803.62959,Cluster-31803.64597,Cluster-31803.65936,Cluster-31803.36206,Cluster-31803.46767,…
GO:0055029	nuclear DNA-directed RNA polymerase complex	cellular_component	1	28	Cluster-31803.7700,Cluster-31803.83180,Cluster-31803.64605,Cluster-31803.64612,Cluster-31803.15368,Cluster-31803.46340,Cluster-31803.27182,Cluster-31803.69296,Cluster-31803.51719,Cluster-31803.31069,Cluster-31803.21799,Cluster-31803.69982,Cluster-31803.64617,Cluster-31803.61564,Cluster-31803.39118,Cluster-31803.64597,Cluster-31803.62959,Cluster-31803.65936,Cluster-31803.36206,Cluster-31803.56122,…
GO:0001518	voltage-gated sodium channel complex	cellular_component	1	2	Cluster-31803.55037,Cluster-31803.58906
GO:0005248	voltage-gated sodium channel activity	molecular_function	1	2	Cluster-31803.58906,Cluster-31803.55037
GO:0034706	sodium channel complex	cellular_component	1	2	Cluster-31803.55037,Cluster-31803.58906
GO:0042575	DNA polymerase complex	cellular_component	1	11	Cluster-31803.55854,Cluster-31803.39821,Cluster-31803.100020,Cluster-31803.69139,Cluster-31803.62576,Cluster-31803.71701,Cluster-31803.41140,Cluster-31803.39186,Cluster-31803.58329,Cluster-31803.38106,Cluster-31803.58994
GO:0042301	phosphate ion binding	molecular_function	1	2	Cluster-31803.67031,Cluster-31803.67069
GO:0009066	aspartate family amino acid metabolic process	biological_process	1	20	Cluster-31803.54710,Cluster-31803.86310,Cluster-31803.86747,Cluster-31803.4794,Cluster-31803.25822,Cluster-31803.54712,Cluster-31803.72549,Cluster-31803.45498,Cluster-31803.28776,Cluster-31803.37600,Cluster-31803.38042,Cluster-31803.46795,Cluster-31803.76193,Cluster-31803.99504,Cluster-31803.25539,Cluster-31803.81751,Cluster-31803.25826,Cluster-31803.84659,Cluster-31803.84665,Cluster-31803.52297
GO:0032797	SMN complex	cellular_component	1	1	Cluster-31803.74945
GO:0016878	acid-thiol ligase activity	molecular_function	1	2	Cluster-31803.40957,Cluster-31803.59602
GO:0000746	conjugation	biological_process	1	4	Cluster-31803.63296,Cluster-31803.59911,Cluster-31803.97871,Cluster-31803.15683
GO:0015976	carbon utilization	biological_process	1	8	Cluster-31803.53354,Cluster-31803.59214,Cluster-31803.101533,Cluster-31803.59222,Cluster-31803.44058,Cluster-31803.77576,Cluster-31803.59210,Cluster-31803.56331
GO:0004733	pyridoxamine-phosphate oxidase activity	molecular_function	1	2	Cluster-31803.45484,Cluster-31803.45486
GO:0006083	acetate metabolic process	biological_process	1	2	Cluster-31803.40957,Cluster-31803.59602
GO:0048869	cellular developmental process	biological_process	1	17	Cluster-31803.45632,Cluster-31803.62576,Cluster-31803.71701,Cluster-31803.68598,Cluster-31803.92817,Cluster-31803.44221,Cluster-31803.41140,Cluster-31803.91716,Cluster-31803.54211,Cluster-31803.92051,Cluster-31803.46795,Cluster-31803.74462,Cluster-31803.15545,Cluster-31803.72458,Cluster-31803.83110,Cluster-31803.25903,Cluster-31803.54463
GO:0010959	regulation of metal ion transport	biological_process	1	3	Cluster-31803.100697,Cluster-31803.105902,Cluster-31803.90956
GO:0016591	DNA-directed RNA polymerase II, holoenzyme	cellular_component	1	27	Cluster-31803.45483,Cluster-31803.90956,Cluster-31803.74549,Cluster-31803.97871,Cluster-31803.36923,Cluster-31803.65936,Cluster-31803.62959,Cluster-31803.64597,Cluster-31803.46767,Cluster-31803.57530,Cluster-31803.56122,Cluster-31803.36206,Cluster-31803.51719,Cluster-31803.69296,Cluster-31803.27182,Cluster-31803.39118,Cluster-31803.61564,Cluster-31803.64617,Cluster-31803.21799,Cluster-31803.69982…
GO:0004518	nuclease activity	molecular_function	1	23	Cluster-31803.46675,Cluster-31803.54117,Cluster-31803.52096,Cluster-31803.22459,Cluster-31803.35115,Cluster-31803.42838,Cluster-31803.7700,Cluster-31803.85230,Cluster-31803.44422,Cluster-31803.90461,Cluster-31803.74308,Cluster-31803.68814,Cluster-31803.53448,Cluster-31803.74871,Cluster-31803.27054,Cluster-31803.41549,Cluster-31803.39821,Cluster-31803.30779,Cluster-31803.101354,Cluster-31803.19238…
GO:0000154	rRNA modification	biological_process	1	5	Cluster-31803.39022,Cluster-31803.81384,Cluster-31803.38204,Cluster-31803.102494,Cluster-31803.25254
GO:0000302	response to reactive oxygen species	biological_process	1	2	Cluster-31803.48726,Cluster-31803.68814
GO:0006534	cysteine metabolic process	biological_process	1	4	Cluster-31803.69742,Cluster-31803.51122,Cluster-31803.38855,Cluster-31803.57725
GO:0005217	intracellular ligand-gated ion channel activity	molecular_function	1	6	Cluster-31803.54463,Cluster-31803.45483,Cluster-31803.35654,Cluster-31803.54236,Cluster-31803.93098,Cluster-31803.54240
GO:0005218	intracellular ligand-gated calcium channel activity	molecular_function	1	6	Cluster-31803.93098,Cluster-31803.54240,Cluster-31803.54236,Cluster-31803.35654,Cluster-31803.45483,Cluster-31803.54463
GO:0005219	ryanodine-sensitive calcium-release channel activity	molecular_function	1	6	Cluster-31803.54240,Cluster-31803.93098,Cluster-31803.45483,Cluster-31803.54463,Cluster-31803.35654,Cluster-31803.54236
GO:0015278	calcium-release channel activity	molecular_function	1	6	Cluster-31803.54240,Cluster-31803.93098,Cluster-31803.45483,Cluster-31803.54463,Cluster-31803.35654,Cluster-31803.54236
GO:0004806	triglyceride lipase activity	molecular_function	1	2	Cluster-31803.36206,Cluster-31803.9809
GO:0016671	oxidoreductase activity, acting on a sulfur group of donors, disulfide as acceptor	molecular_function	1	2	Cluster-31803.26296,Cluster-31803.30686
GO:0044463	cell projection part	cellular_component	1	3	Cluster-31803.71701,Cluster-31803.62576,Cluster-31803.41140
GO:0018966	styrene metabolic process	biological_process	1	2	Cluster-31803.96358,Cluster-31803.46305
GO:0042207	styrene catabolic process	biological_process	1	2	Cluster-31803.46305,Cluster-31803.96358
GO:1900673	olefin metabolic process	biological_process	1	2	Cluster-31803.96358,Cluster-31803.46305
GO:0015994	chlorophyll metabolic process	biological_process	1	8	Cluster-31803.15518,Cluster-31803.76092,Cluster-31803.45498,Cluster-31803.38855,Cluster-31803.24959,Cluster-31803.6659,Cluster-31803.33376,Cluster-31803.70958
GO:0006091	generation of precursor metabolites and energy	biological_process	1	30	Cluster-31803.64601,Cluster-31803.44058,Cluster-31803.57530,Cluster-31803.74400,Cluster-31803.64597,Cluster-31803.62748,Cluster-31803.48966,Cluster-31803.45694,Cluster-31803.67675,Cluster-31803.39821,Cluster-31803.74549,Cluster-31803.64596,Cluster-31803.72674,Cluster-31803.77209,Cluster-31803.55475,Cluster-31803.64602,Cluster-31803.21942,Cluster-31803.64605,Cluster-31803.57662,Cluster-31803.64612…
GO:0051273	beta-glucan metabolic process	biological_process	1	3	Cluster-31803.103378,Cluster-31803.103379,Cluster-31803.39118
GO:0004019	adenylosuccinate synthase activity	molecular_function	1	1	Cluster-31803.81751
GO:0071840	cellular component organization or biogenesis	biological_process	1	116	Cluster-31803.79056,Cluster-31803.25826,Cluster-31803.75445,Cluster-31803.54211,Cluster-31803.65426,Cluster-31803.93098,Cluster-31803.29294,Cluster-31803.60827,Cluster-31803.80840,Cluster-31803.54463,Cluster-31803.61089,Cluster-31803.78451,Cluster-31803.65936,Cluster-31803.96355,Cluster-31803.76193,Cluster-31803.36831,Cluster-31803.99504,Cluster-31803.19238,Cluster-31803.102830,Cluster-31803.5583…
GO:0031647	regulation of protein stability	biological_process	1	2	Cluster-31803.67031,Cluster-31803.67069
GO:0050821	protein stabilization	biological_process	1	2	Cluster-31803.67031,Cluster-31803.67069
GO:0009007	site-specific DNA-methyltransferase (adenine-specific) activity	molecular_function	1	1	Cluster-31803.25254
GO:0032775	DNA methylation on adenine	biological_process	1	1	Cluster-31803.25254
GO:0016840	carbon-nitrogen lyase activity	molecular_function	1	3	Cluster-31803.25539,Cluster-31803.104927,Cluster-31803.13827
GO:0000271	polysaccharide biosynthetic process	biological_process	1	5	Cluster-31803.39118,Cluster-31803.95433,Cluster-31803.74549,Cluster-31803.103379,Cluster-31803.103378
GO:0019693	ribose phosphate metabolic process	biological_process	1	34	Cluster-31803.62748,Cluster-31803.101533,Cluster-31803.59222,Cluster-31803.25539,Cluster-31803.44058,Cluster-31803.38042,Cluster-31803.72674,Cluster-31803.52297,Cluster-31803.39821,Cluster-31803.42219,Cluster-31803.54710,Cluster-31803.77576,Cluster-31803.40957,Cluster-31803.47890,Cluster-31803.59602,Cluster-31803.48689,Cluster-31803.54712,Cluster-31803.59214,Cluster-31803.48966,Cluster-31803.4679…
GO:0006535	cysteine biosynthetic process from serine	biological_process	1	2	Cluster-31803.38855,Cluster-31803.69742
GO:0031301	integral component of organelle membrane	cellular_component	1	10	Cluster-31803.68814,Cluster-31803.25822,Cluster-31803.104362,Cluster-31803.105902,Cluster-31803.90956,Cluster-31803.43813,Cluster-31803.100697,Cluster-31803.55037,Cluster-31803.43812,Cluster-31803.33595
GO:0002218	activation of innate immune response	biological_process	1	1	Cluster-31803.27182
GO:0031349	positive regulation of defense response	biological_process	1	1	Cluster-31803.27182
GO:0045089	positive regulation of innate immune response	biological_process	1	1	Cluster-31803.27182
GO:0017089	glycolipid transporter activity	molecular_function	1	1	Cluster-31803.92931
GO:0046836	glycolipid transport	biological_process	1	1	Cluster-31803.92931
GO:0015459	potassium channel regulator activity	molecular_function	1	2	Cluster-31803.69543,Cluster-31803.66979
GO:0019870	potassium channel inhibitor activity	molecular_function	1	2	Cluster-31803.69543,Cluster-31803.66979
GO:0005272	sodium channel activity	molecular_function	1	2	Cluster-31803.55037,Cluster-31803.58906
GO:0006139	nucleobase-containing compound metabolic process	biological_process	1	244	Cluster-31803.64605,Cluster-31803.76092,Cluster-31803.25899,Cluster-31803.26272,Cluster-31803.103378,Cluster-31803.56331,Cluster-31803.79189,Cluster-31803.102530,Cluster-31803.72117,Cluster-31803.37116,Cluster-31803.46795,Cluster-31803.52171,Cluster-31803.57530,Cluster-31803.97049,Cluster-31803.67069,Cluster-31803.75298,Cluster-31803.45694,Cluster-31803.26254,Cluster-31803.31653,Cluster-31803.411…
GO:0045088	regulation of innate immune response	biological_process	1	1	Cluster-31803.27182
GO:0006793	phosphorus metabolic process	biological_process	1	105	Cluster-31803.66661,Cluster-31803.79832,Cluster-31803.42219,Cluster-31803.69139,Cluster-31803.59602,Cluster-31803.48689,Cluster-31803.46994,Cluster-31803.105902,Cluster-31803.103379,Cluster-31803.64842,Cluster-31803.106118,Cluster-31803.68257,Cluster-31803.25539,Cluster-31803.65630,Cluster-31803.59222,Cluster-31803.38042,Cluster-31803.47594,Cluster-31803.45486,Cluster-31803.101533,Cluster-31803.3…
GO:0007172	signal complex assembly	biological_process	1	1	Cluster-31803.54463
GO:1901564	organonitrogen compound metabolic process	biological_process	1	163	Cluster-31803.82992,Cluster-31803.54710,Cluster-31803.13126,Cluster-31803.24959,Cluster-31803.61344,Cluster-31803.53273,Cluster-31803.68033,Cluster-31803.108977,Cluster-31803.15005,Cluster-31803.86747,Cluster-31803.25822,Cluster-31803.47890,Cluster-31803.4794,Cluster-31803.39022,Cluster-31803.94898,Cluster-31803.44058,Cluster-31803.76193,Cluster-31803.65936,Cluster-31803.62748,Cluster-31803.80840…
GO:0009615	response to virus	biological_process	1	5	Cluster-31803.91237,Cluster-31803.41140,Cluster-31803.47890,Cluster-31803.71701,Cluster-31803.85230
GO:0070403	NAD+ binding	molecular_function	1	2	Cluster-31803.72892,Cluster-31803.28588
GO:0046332	SMAD binding	molecular_function	1	2	Cluster-31803.44703,Cluster-31803.44702
GO:0044699	single-organism process	biological_process	1	386	Cluster-31803.54710,Cluster-31803.27923,Cluster-31803.61344,Cluster-31803.42913,Cluster-31803.74308,Cluster-31803.85230,Cluster-31803.105483,Cluster-31803.24959,Cluster-31803.67849,Cluster-31803.50040,Cluster-31803.55859,Cluster-31803.39022,Cluster-31803.86747,Cluster-31803.76193,Cluster-31803.101354,Cluster-31803.55837,Cluster-31803.41446,Cluster-31803.65936,Cluster-31803.93098,Cluster-31803.369…
GO:0006505	GPI anchor metabolic process	biological_process	1	7	Cluster-31803.36206,Cluster-31803.32535,Cluster-31803.35115,Cluster-31803.41549,Cluster-31803.95022,Cluster-31803.14138,Cluster-31803.77209
GO:0042438	melanin biosynthetic process	biological_process	1	2	Cluster-31803.69518,Cluster-31803.70281
GO:0046189	phenol-containing compound biosynthetic process	biological_process	1	2	Cluster-31803.70281,Cluster-31803.69518
GO:0015980	energy derivation by oxidation of organic compounds	biological_process	1	17	Cluster-31803.46994,Cluster-31803.59602,Cluster-31803.64617,Cluster-31803.40957,Cluster-31803.57662,Cluster-31803.64612,Cluster-31803.64602,Cluster-31803.64605,Cluster-31803.53354,Cluster-31803.74549,Cluster-31803.45694,Cluster-31803.72674,Cluster-31803.55475,Cluster-31803.64596,Cluster-31803.64601,Cluster-31803.48966,Cluster-31803.64597
GO:0008614	pyridoxine metabolic process	biological_process	1	2	Cluster-31803.45486,Cluster-31803.45484
GO:0008615	pyridoxine biosynthetic process	biological_process	1	2	Cluster-31803.45486,Cluster-31803.45484
GO:1901617	organic hydroxy compound biosynthetic process	biological_process	1	5	Cluster-31803.70281,Cluster-31803.69518,Cluster-31803.45486,Cluster-31803.21942,Cluster-31803.45484
GO:0004100	chitin synthase activity	molecular_function	1	1	Cluster-31803.9120
GO:0006031	chitin biosynthetic process	biological_process	1	1	Cluster-31803.9120
GO:0046349	amino sugar biosynthetic process	biological_process	1	1	Cluster-31803.9120
GO:1901073	glucosamine-containing compound biosynthetic process	biological_process	1	1	Cluster-31803.9120
GO:0009008	DNA-methyltransferase activity	molecular_function	1	1	Cluster-31803.25254
GO:0006725	cellular aromatic compound metabolic process	biological_process	1	264	Cluster-31803.59478,Cluster-31803.31080,Cluster-31803.6639,Cluster-31803.25539,Cluster-31803.25254,Cluster-31803.59222,Cluster-31803.71264,Cluster-31803.38042,Cluster-31803.64167,Cluster-31803.69296,Cluster-31803.62576,Cluster-31803.101311,Cluster-31803.42524,Cluster-31803.26592,Cluster-31803.48689,Cluster-31803.44422,Cluster-31803.58128,Cluster-31803.45483,Cluster-31803.42009,Cluster-31803.54423…
GO:0031412	gas vesicle organization	biological_process	1	2	Cluster-31803.6430,Cluster-31803.24959
GO:0004555	alpha,alpha-trehalase activity	molecular_function	1	2	Cluster-31803.20998,Cluster-31803.26197
GO:0015927	trehalase activity	molecular_function	1	2	Cluster-31803.26197,Cluster-31803.20998
GO:0042151	nematocyst	cellular_component	1	2	Cluster-31803.48798,Cluster-31803.45214
GO:0071704	organic substance metabolic process	biological_process	1	419	Cluster-31803.52629,Cluster-31803.42524,Cluster-31803.48689,Cluster-31803.95712,Cluster-31803.26592,Cluster-31803.62576,Cluster-31803.101311,Cluster-31803.105902,Cluster-31803.64167,Cluster-31803.69296,Cluster-31803.64842,Cluster-31803.42340,Cluster-31803.58128,Cluster-31803.44422,Cluster-31803.66661,Cluster-31803.96237,Cluster-31803.31080,Cluster-31803.59478,Cluster-31803.38042,Cluster-31803.723…
GO:0004526	ribonuclease P activity	molecular_function	1	2	Cluster-31803.66090,Cluster-31803.7700
GO:1901701	cellular response to oxygen-containing compound	biological_process	1	1	Cluster-31803.48726
GO:0019344	cysteine biosynthetic process	biological_process	1	2	Cluster-31803.38855,Cluster-31803.69742
GO:0048518	positive regulation of biological process	biological_process	1	18	Cluster-31803.27182,Cluster-31803.52989,Cluster-31803.25822,Cluster-31803.71701,Cluster-31803.45055,Cluster-31803.38204,Cluster-31803.81410,Cluster-31803.41140,Cluster-31803.32161,Cluster-31803.43520,Cluster-31803.25826,Cluster-31803.44221,Cluster-31803.91237,Cluster-31803.48754,Cluster-31803.67069,Cluster-31803.15545,Cluster-31803.72458,Cluster-31803.41951
GO:0070009	serine-type aminopeptidase activity	molecular_function	1	3	Cluster-31803.45498,Cluster-31803.91237,Cluster-31803.77576
GO:0003997	acyl-CoA oxidase activity	molecular_function	1	2	Cluster-31803.80077,Cluster-31803.63151
GO:0005337	nucleoside transmembrane transporter activity	molecular_function	1	2	Cluster-31803.40772,Cluster-31803.68945
GO:0009085	lysine biosynthetic process	biological_process	1	4	Cluster-31803.28776,Cluster-31803.76193,Cluster-31803.25826,Cluster-31803.25822
GO:0006885	regulation of pH	biological_process	1	5	Cluster-31803.69005,Cluster-31803.16576,Cluster-31803.44058,Cluster-31803.23780,Cluster-31803.74434
GO:0055067	monovalent inorganic cation homeostasis	biological_process	1	5	Cluster-31803.16576,Cluster-31803.44058,Cluster-31803.69005,Cluster-31803.23780,Cluster-31803.74434
GO:0004363	glutathione synthase activity	molecular_function	1	2	Cluster-31803.29590,Cluster-31803.51447
GO:0090575	RNA polymerase II transcription factor complex	cellular_component	1	24	Cluster-31803.90956,Cluster-31803.45483,Cluster-31803.36923,Cluster-31803.97871,Cluster-31803.74549,Cluster-31803.64597,Cluster-31803.62959,Cluster-31803.65936,Cluster-31803.36206,Cluster-31803.56122,Cluster-31803.57530,Cluster-31803.46767,Cluster-31803.69296,Cluster-31803.21799,Cluster-31803.69982,Cluster-31803.31069,Cluster-31803.64617,Cluster-31803.39118,Cluster-31803.61564,Cluster-31803.7700,…
GO:0004175	endopeptidase activity	molecular_function	1	48	Cluster-31803.58685,Cluster-31803.77576,Cluster-31803.13126,Cluster-31803.42219,Cluster-31803.69742,Cluster-31803.31416,Cluster-31803.26998,Cluster-31803.108977,Cluster-31803.95712,Cluster-31803.88388,Cluster-31803.40352,Cluster-31803.56122,Cluster-31803.95113,Cluster-31803.82761,Cluster-31803.36429,Cluster-31803.62748,Cluster-31803.45498,Cluster-31803.72213,Cluster-31803.68814,Cluster-31803.3108…
GO:0031300	intrinsic component of organelle membrane	cellular_component	1	10	Cluster-31803.100697,Cluster-31803.55037,Cluster-31803.43812,Cluster-31803.33595,Cluster-31803.43813,Cluster-31803.104362,Cluster-31803.25822,Cluster-31803.105902,Cluster-31803.90956,Cluster-31803.68814
GO:0006582	melanin metabolic process	biological_process	1	2	Cluster-31803.70281,Cluster-31803.69518
GO:0046686	response to cadmium ion	biological_process	1	2	Cluster-31803.46994,Cluster-31803.24959
GO:0001522	pseudouridine synthesis	biological_process	1	6	Cluster-31803.67031,Cluster-31803.80548,Cluster-31803.93098,Cluster-31803.44221,Cluster-31803.72458,Cluster-31803.77902
GO:0000314	organellar small ribosomal subunit	cellular_component	1	1	Cluster-31803.51447
GO:0005763	mitochondrial small ribosomal subunit	cellular_component	1	1	Cluster-31803.51447
GO:0003677	DNA binding	molecular_function	1	108	Cluster-31803.47177,Cluster-31803.58375,Cluster-31803.31214,Cluster-31803.85230,Cluster-31803.49879,Cluster-31803.54117,Cluster-31803.63895,Cluster-31803.67042,Cluster-31803.55859,Cluster-31803.9086,Cluster-31803.25822,Cluster-31803.47799,Cluster-31803.37899,Cluster-31803.99504,Cluster-31803.15588,Cluster-31803.80840,Cluster-31803.38106,Cluster-31803.36923,Cluster-31803.65426,Cluster-31803.93098,…
GO:0016491	oxidoreductase activity	molecular_function	1	101	Cluster-31803.33595,Cluster-31803.54712,Cluster-31803.72549,Cluster-31803.51982,Cluster-31803.45484,Cluster-31803.71782,Cluster-31803.30686,Cluster-31803.98072,Cluster-31803.59210,Cluster-31803.55475,Cluster-31803.48726,Cluster-31803.82070,Cluster-31803.77209,Cluster-31803.64574,Cluster-31803.67675,Cluster-31803.24311,Cluster-31803.56206,Cluster-31803.98485,Cluster-31803.64541,Cluster-31803.96909…
GO:0008239	dipeptidyl-peptidase activity	molecular_function	1	3	Cluster-31803.91237,Cluster-31803.45498,Cluster-31803.77576
GO:0015035	protein disulfide oxidoreductase activity	molecular_function	1	6	Cluster-31803.65426,Cluster-31803.64542,Cluster-31803.48689,Cluster-31803.64541,Cluster-31803.56206,Cluster-31803.8555
GO:0005262	calcium channel activity	molecular_function	1	6	Cluster-31803.54236,Cluster-31803.35654,Cluster-31803.45483,Cluster-31803.54463,Cluster-31803.54240,Cluster-31803.93098
GO:0019048	modulation by virus of host morphology or physiology	biological_process	1	10	Cluster-31803.30091,Cluster-31803.46675,Cluster-31803.64563,Cluster-31803.41140,Cluster-31803.43520,Cluster-31803.69296,Cluster-31803.62576,Cluster-31803.71701,Cluster-31803.95113,Cluster-31803.45498
GO:0005125	cytokine activity	molecular_function	1	3	Cluster-31803.62104,Cluster-31803.41140,Cluster-31803.71701
GO:0009072	aromatic amino acid family metabolic process	biological_process	1	17	Cluster-31803.15741,Cluster-31803.72549,Cluster-31803.54712,Cluster-31803.32149,Cluster-31803.46795,Cluster-31803.64574,Cluster-31803.82070,Cluster-31803.46305,Cluster-31803.75133,Cluster-31803.52297,Cluster-31803.42103,Cluster-31803.107323,Cluster-31803.100522,Cluster-31803.24311,Cluster-31803.54710,Cluster-31803.96358,Cluster-31803.45055
GO:0046849	bone remodeling	biological_process	1	1	Cluster-31803.87059
GO:0048771	tissue remodeling	biological_process	1	1	Cluster-31803.87059
GO:0006570	tyrosine metabolic process	biological_process	1	11	Cluster-31803.82070,Cluster-31803.96358,Cluster-31803.46305,Cluster-31803.75133,Cluster-31803.45055,Cluster-31803.107323,Cluster-31803.42103,Cluster-31803.24311,Cluster-31803.100522,Cluster-31803.15741,Cluster-31803.32149
GO:0030880	RNA polymerase complex	cellular_component	1	30	Cluster-31803.39118,Cluster-31803.61564,Cluster-31803.45055,Cluster-31803.64617,Cluster-31803.21799,Cluster-31803.69982,Cluster-31803.31069,Cluster-31803.51719,Cluster-31803.69296,Cluster-31803.27182,Cluster-31803.64612,Cluster-31803.46340,Cluster-31803.15368,Cluster-31803.83180,Cluster-31803.64605,Cluster-31803.7700,Cluster-31803.100458,Cluster-31803.74549,Cluster-31803.93098,Cluster-31803.36923…
GO:0019213	deacetylase activity	molecular_function	1	2	Cluster-31803.78451,Cluster-31803.78456
GO:0005635	nuclear envelope	cellular_component	1	7	Cluster-31803.45214,Cluster-31803.48798,Cluster-31803.43812,Cluster-31803.43813,Cluster-31803.24266,Cluster-31803.5552,Cluster-31803.93098
GO:0006593	ornithine catabolic process	biological_process	1	1	Cluster-31803.21601
GO:0008073	ornithine decarboxylase inhibitor activity	molecular_function	1	1	Cluster-31803.21601
GO:0019467	ornithine catabolic process, by decarboxylation	biological_process	1	1	Cluster-31803.21601
GO:0046654	tetrahydrofolate biosynthetic process	biological_process	1	1	Cluster-31803.71782
GO:0044780	bacterial-type flagellum assembly	biological_process	1	2	Cluster-31803.25822,Cluster-31803.25826
GO:0001649	osteoblast differentiation	biological_process	1	1	Cluster-31803.92051
GO:0045667	regulation of osteoblast differentiation	biological_process	1	1	Cluster-31803.92051
GO:0044798	nuclear transcription factor complex	cellular_component	1	24	Cluster-31803.90956,Cluster-31803.45483,Cluster-31803.74549,Cluster-31803.36923,Cluster-31803.97871,Cluster-31803.65936,Cluster-31803.62959,Cluster-31803.64597,Cluster-31803.56122,Cluster-31803.46767,Cluster-31803.57530,Cluster-31803.36206,Cluster-31803.69296,Cluster-31803.39118,Cluster-31803.61564,Cluster-31803.21799,Cluster-31803.69982,Cluster-31803.31069,Cluster-31803.64617,Cluster-31803.46340…
GO:0016744	transferase activity, transferring aldehyde or ketonic groups	molecular_function	1	3	Cluster-31803.48798,Cluster-31803.45214,Cluster-31803.54423
GO:0015298	solute:cation antiporter activity	molecular_function	1	5	Cluster-31803.23780,Cluster-31803.74434,Cluster-31803.69005,Cluster-31803.16576,Cluster-31803.44058
GO:0015299	solute:proton antiporter activity	molecular_function	1	5	Cluster-31803.74434,Cluster-31803.23780,Cluster-31803.69005,Cluster-31803.44058,Cluster-31803.16576
GO:0030976	thiamine pyrophosphate binding	molecular_function	1	6	Cluster-31803.61564,Cluster-31803.67675,Cluster-31803.45214,Cluster-31803.48798,Cluster-31803.55243,Cluster-31803.43520
GO:0044238	primary metabolic process	biological_process	1	404	Cluster-31803.75133,Cluster-31803.26254,Cluster-31803.43254,Cluster-31803.31653,Cluster-31803.41140,Cluster-31803.11135,Cluster-31803.60760,Cluster-31803.27706,Cluster-31803.105554,Cluster-31803.20011,Cluster-31803.72656,Cluster-31803.84316,Cluster-31803.75298,Cluster-31803.79189,Cluster-31803.40725,Cluster-31803.72117,Cluster-31803.74328,Cluster-31803.76092,Cluster-31803.103378,Cluster-31803.292…
GO:0016073	snRNA metabolic process	biological_process	1	1	Cluster-31803.77902
GO:0004825	methionine-tRNA ligase activity	molecular_function	1	1	Cluster-31803.86310
GO:0006431	methionyl-tRNA aminoacylation	biological_process	1	1	Cluster-31803.86310
GO:0015085	calcium ion transmembrane transporter activity	molecular_function	1	6	Cluster-31803.54240,Cluster-31803.93098,Cluster-31803.45483,Cluster-31803.54463,Cluster-31803.35654,Cluster-31803.54236
GO:0042493	response to drug	biological_process	1	4	Cluster-31803.31171,Cluster-31803.61888,Cluster-31803.101533,Cluster-31803.77209
GO:1901360	organic cyclic compound metabolic process	biological_process	1	272	Cluster-31803.55475,Cluster-31803.82070,Cluster-31803.70958,Cluster-31803.74549,Cluster-31803.31213,Cluster-31803.93526,Cluster-31803.67675,Cluster-31803.97871,Cluster-31803.72549,Cluster-31803.74400,Cluster-31803.15518,Cluster-31803.45484,Cluster-31803.6659,Cluster-31803.55854,Cluster-31803.98485,Cluster-31803.51240,Cluster-31803.81410,Cluster-31803.100522,Cluster-31803.43812,Cluster-31803.24311…
GO:0045263	proton-transporting ATP synthase complex, coupling factor F(o)	cellular_component	1	3	Cluster-31803.76092,Cluster-31803.70958,Cluster-31803.47890
GO:0023014	signal transduction by protein phosphorylation	biological_process	1	2	Cluster-31803.15005,Cluster-31803.95642
GO:0042221	response to chemical	biological_process	1	21	Cluster-31803.61888,Cluster-31803.48074,Cluster-31803.13827,Cluster-31803.101533,Cluster-31803.38855,Cluster-31803.91237,Cluster-31803.46305,Cluster-31803.68814,Cluster-31803.48726,Cluster-31803.77209,Cluster-31803.91716,Cluster-31803.15979,Cluster-31803.24959,Cluster-31803.29590,Cluster-31803.61344,Cluster-31803.46994,Cluster-31803.31171,Cluster-31803.105582,Cluster-31803.96358,Cluster-31803.303…
GO:0031224	intrinsic component of membrane	cellular_component	1	140	Cluster-31803.77209,Cluster-31803.42009,Cluster-31803.43520,Cluster-31803.45483,Cluster-31803.53448,Cluster-31803.58329,Cluster-31803.33595,Cluster-31803.62959,Cluster-31803.51248,Cluster-31803.36206,Cluster-31803.10715,Cluster-31803.23780,Cluster-31803.75438,Cluster-31803.23749,Cluster-31803.35624,Cluster-31803.24020,Cluster-31803.100697,Cluster-31803.88544,Cluster-31803.64971,Cluster-31803.3565…
GO:0045333	cellular respiration	biological_process	1	16	Cluster-31803.45694,Cluster-31803.55475,Cluster-31803.72674,Cluster-31803.64596,Cluster-31803.64601,Cluster-31803.48966,Cluster-31803.64597,Cluster-31803.46994,Cluster-31803.64617,Cluster-31803.59602,Cluster-31803.40957,Cluster-31803.57662,Cluster-31803.64612,Cluster-31803.64605,Cluster-31803.64602,Cluster-31803.53354
GO:0006450	regulation of translational fidelity	biological_process	1	2	Cluster-31803.75298,Cluster-31803.95747
GO:0042979	ornithine decarboxylase regulator activity	molecular_function	1	1	Cluster-31803.21601
GO:0015036	disulfide oxidoreductase activity	molecular_function	1	6	Cluster-31803.8555,Cluster-31803.56206,Cluster-31803.64541,Cluster-31803.48689,Cluster-31803.64542,Cluster-31803.65426
GO:0044723	single-organism carbohydrate metabolic process	biological_process	1	32	Cluster-31803.64563,Cluster-31803.104362,Cluster-31803.72674,Cluster-31803.52297,Cluster-31803.41446,Cluster-31803.44058,Cluster-31803.20998,Cluster-31803.39022,Cluster-31803.40957,Cluster-31803.103379,Cluster-31803.59602,Cluster-31803.52629,Cluster-31803.54710,Cluster-31803.58128,Cluster-31803.77576,Cluster-31803.26197,Cluster-31803.74549,Cluster-31803.95433,Cluster-31803.62621,Cluster-31803.547…
GO:0031071	cysteine desulfurase activity	molecular_function	1	1	Cluster-31803.57725
GO:0008173	RNA methyltransferase activity	molecular_function	1	9	Cluster-31803.39022,Cluster-31803.13030,Cluster-31803.55044,Cluster-31803.91701,Cluster-31803.51240,Cluster-31803.88081,Cluster-31803.18502,Cluster-31803.102494,Cluster-31803.46795
GO:0016730	oxidoreductase activity, acting on iron-sulfur proteins as donors	molecular_function	1	2	Cluster-31803.33595,Cluster-31803.95747
GO:0018958	phenol-containing compound metabolic process	biological_process	1	2	Cluster-31803.69518,Cluster-31803.70281
GO:0043269	regulation of ion transport	biological_process	1	3	Cluster-31803.100697,Cluster-31803.105902,Cluster-31803.90956
GO:0006077	(1->6)-beta-D-glucan metabolic process	biological_process	1	1	Cluster-31803.39118
GO:0006078	(1->6)-beta-D-glucan biosynthetic process	biological_process	1	1	Cluster-31803.39118
GO:0051537	2 iron, 2 sulfur cluster binding	molecular_function	1	6	Cluster-31803.24311,Cluster-31803.47594,Cluster-31803.63151,Cluster-31803.13827,Cluster-31803.67675,Cluster-31803.79185
GO:0042178	xenobiotic catabolic process	biological_process	1	2	Cluster-31803.96358,Cluster-31803.46305
GO:0000902	cell morphogenesis	biological_process	1	6	Cluster-31803.74462,Cluster-31803.71701,Cluster-31803.62576,Cluster-31803.91716,Cluster-31803.41140,Cluster-31803.25903
GO:0032989	cellular component morphogenesis	biological_process	1	6	Cluster-31803.62576,Cluster-31803.71701,Cluster-31803.25903,Cluster-31803.41140,Cluster-31803.91716,Cluster-31803.74462
GO:0004386	helicase activity	molecular_function	1	26	Cluster-31803.47799,Cluster-31803.19072,Cluster-31803.71264,Cluster-31803.107691,Cluster-31803.45498,Cluster-31803.23170,Cluster-31803.35937,Cluster-31803.38106,Cluster-31803.15588,Cluster-31803.97871,Cluster-31803.44374,Cluster-31803.60636,Cluster-31803.70281,Cluster-31803.47741,Cluster-31803.30779,Cluster-31803.51045,Cluster-31803.54524,Cluster-31803.101418,Cluster-31803.32685,Cluster-31803.421…
GO:0072593	reactive oxygen species metabolic process	biological_process	1	3	Cluster-31803.48726,Cluster-31803.64574,Cluster-31803.55383
GO:0009074	aromatic amino acid family catabolic process	biological_process	1	2	Cluster-31803.46305,Cluster-31803.96358
GO:0007178	transmembrane receptor protein serine/threonine kinase signaling pathway	biological_process	1	3	Cluster-31803.15005,Cluster-31803.95642,Cluster-31803.9845
GO:0006188	IMP biosynthetic process	biological_process	1	3	Cluster-31803.48689,Cluster-31803.25539,Cluster-31803.107323
GO:0046040	IMP metabolic process	biological_process	1	3	Cluster-31803.25539,Cluster-31803.48689,Cluster-31803.107323
GO:0051234	establishment of localization	biological_process	1	171	Cluster-31803.53448,Cluster-31803.14138,Cluster-31803.42009,Cluster-31803.45483,Cluster-31803.77209,Cluster-31803.36206,Cluster-31803.62959,Cluster-31803.58329,Cluster-31803.46681,Cluster-31803.24020,Cluster-31803.87789,Cluster-31803.75438,Cluster-31803.23749,Cluster-31803.35624,Cluster-31803.95022,Cluster-31803.63151,Cluster-31803.23780,Cluster-31803.10715,Cluster-31803.45214,Cluster-31803.29543…
GO:1990234	transferase complex	cellular_component	1	57	Cluster-31803.44058,Cluster-31803.56122,Cluster-31803.65936,Cluster-31803.58994,Cluster-31803.77933,Cluster-31803.38106,Cluster-31803.68814,Cluster-31803.93098,Cluster-31803.100020,Cluster-31803.39821,Cluster-31803.31080,Cluster-31803.36923,Cluster-31803.59478,Cluster-31803.104362,Cluster-31803.30959,Cluster-31803.90956,Cluster-31803.83180,Cluster-31803.7700,Cluster-31803.39186,Cluster-31803.2699…
GO:0034069	aminoglycoside N-acetyltransferase activity	molecular_function	1	1	Cluster-31803.61344
GO:0046353	aminoglycoside 3-N-acetyltransferase activity	molecular_function	1	1	Cluster-31803.61344
GO:0030677	ribonuclease P complex	cellular_component	1	2	Cluster-31803.7700,Cluster-31803.66090
GO:0016715	oxidoreductase activity, acting on paired donors, with incorporation or reduction of molecular oxygen, reduced ascorbate as one donor, and incorporation of one atom of oxygen	molecular_function	1	1	Cluster-31803.50040
GO:0050750	low-density lipoprotein particle receptor binding	molecular_function	1	1	Cluster-31803.91237
GO:0070325	lipoprotein particle receptor binding	molecular_function	1	1	Cluster-31803.91237
GO:0004549	tRNA-specific ribonuclease activity	molecular_function	1	2	Cluster-31803.7700,Cluster-31803.66090
GO:0016842	amidine-lyase activity	molecular_function	1	2	Cluster-31803.25539,Cluster-31803.13827
GO:0005669	transcription factor TFIID complex	cellular_component	1	3	Cluster-31803.69982,Cluster-31803.74549,Cluster-31803.90956
GO:0015995	chlorophyll biosynthetic process	biological_process	1	2	Cluster-31803.70958,Cluster-31803.76092
GO:0005672	transcription factor TFIIA complex	cellular_component	1	22	Cluster-31803.65936,Cluster-31803.64597,Cluster-31803.62959,Cluster-31803.57530,Cluster-31803.46767,Cluster-31803.56122,Cluster-31803.36206,Cluster-31803.45483,Cluster-31803.90956,Cluster-31803.36923,Cluster-31803.97871,Cluster-31803.46340,Cluster-31803.64612,Cluster-31803.83180,Cluster-31803.64605,Cluster-31803.7700,Cluster-31803.69296,Cluster-31803.61564,Cluster-31803.39118,Cluster-31803.64617,…
GO:0022607	cellular component assembly	biological_process	1	31	Cluster-31803.36206,Cluster-31803.76193,Cluster-31803.12153,Cluster-31803.74462,Cluster-31803.46795,Cluster-31803.83920,Cluster-31803.55837,Cluster-31803.102830,Cluster-31803.19238,Cluster-31803.61089,Cluster-31803.54463,Cluster-31803.91237,Cluster-31803.41973,Cluster-31803.62383,Cluster-31803.74871,Cluster-31803.41140,Cluster-31803.42009,Cluster-31803.55475,Cluster-31803.25826,Cluster-31803.7918…
GO:0010024	phytochromobilin biosynthetic process	biological_process	1	1	Cluster-31803.30091
GO:0016636	oxidoreductase activity, acting on the CH-CH group of donors, iron-sulfur protein as acceptor	molecular_function	1	1	Cluster-31803.30091
GO:0051202	phytochromobilin metabolic process	biological_process	1	1	Cluster-31803.30091
GO:0016043	cellular component organization	biological_process	1	86	Cluster-31803.25826,Cluster-31803.75445,Cluster-31803.79056,Cluster-31803.60827,Cluster-31803.29294,Cluster-31803.93098,Cluster-31803.65426,Cluster-31803.78451,Cluster-31803.54463,Cluster-31803.61089,Cluster-31803.80840,Cluster-31803.83920,Cluster-31803.55837,Cluster-31803.102830,Cluster-31803.19238,Cluster-31803.107691,Cluster-31803.99504,Cluster-31803.36831,Cluster-31803.76193,Cluster-31803.478…
GO:0010821	regulation of mitochondrion organization	biological_process	1	2	Cluster-31803.38204,Cluster-31803.15545
GO:0010822	positive regulation of mitochondrion organization	biological_process	1	2	Cluster-31803.38204,Cluster-31803.15545
GO:0090199	regulation of release of cytochrome c from mitochondria	biological_process	1	2	Cluster-31803.15545,Cluster-31803.38204
GO:0090200	positive regulation of release of cytochrome c from mitochondria	biological_process	1	2	Cluster-31803.38204,Cluster-31803.15545
GO:0097193	intrinsic apoptotic signaling pathway	biological_process	1	2	Cluster-31803.15545,Cluster-31803.38204
GO:2001233	regulation of apoptotic signaling pathway	biological_process	1	2	Cluster-31803.38204,Cluster-31803.15545
GO:2001235	positive regulation of apoptotic signaling pathway	biological_process	1	2	Cluster-31803.38204,Cluster-31803.15545
GO:0006810	transport	biological_process	1	170	Cluster-31803.107832,Cluster-31803.42219,Cluster-31803.29054,Cluster-31803.49128,Cluster-31803.79185,Cluster-31803.64842,Cluster-31803.14245,Cluster-31803.30323,Cluster-31803.105902,Cluster-31803.64167,Cluster-31803.62576,Cluster-31803.92232,Cluster-31803.82470,Cluster-31803.40352,Cluster-31803.90853,Cluster-31803.58906,Cluster-31803.59222,Cluster-31803.103819,Cluster-31803.54424,Cluster-31803.35…
GO:0046653	tetrahydrofolate metabolic process	biological_process	1	2	Cluster-31803.71782,Cluster-31803.45498
GO:0005777	peroxisome	cellular_component	1	4	Cluster-31803.80077,Cluster-31803.46994,Cluster-31803.33595,Cluster-31803.63151
GO:0042579	microbody	cellular_component	1	4	Cluster-31803.63151,Cluster-31803.33595,Cluster-31803.46994,Cluster-31803.80077
GO:0007623	circadian rhythm	biological_process	1	2	Cluster-31803.94002,Cluster-31803.101311
GO:0015931	nucleobase-containing compound transport	biological_process	1	5	Cluster-31803.40772,Cluster-31803.93098,Cluster-31803.68945,Cluster-31803.48798,Cluster-31803.45214
GO:0034593	phosphatidylinositol bisphosphate phosphatase activity	molecular_function	1	1	Cluster-31803.64574
GO:0034596	phosphatidylinositol phosphate 4-phosphatase activity	molecular_function	1	1	Cluster-31803.64574
GO:0034597	phosphatidylinositol-4,5-bisphosphate 4-phosphatase activity	molecular_function	1	1	Cluster-31803.64574
GO:0046839	phospholipid dephosphorylation	biological_process	1	1	Cluster-31803.64574
GO:0046856	phosphatidylinositol dephosphorylation	biological_process	1	1	Cluster-31803.64574
GO:0052866	phosphatidylinositol phosphate phosphatase activity	molecular_function	1	1	Cluster-31803.64574
GO:0051082	unfolded protein binding	molecular_function	1	11	Cluster-31803.30323,Cluster-31803.54240,Cluster-31803.71874,Cluster-31803.91237,Cluster-31803.85230,Cluster-31803.31635,Cluster-31803.82761,Cluster-31803.54238,Cluster-31803.49084,Cluster-31803.58685,Cluster-31803.50590
GO:0004822	isoleucine-tRNA ligase activity	molecular_function	1	1	Cluster-31803.75298
GO:0006428	isoleucyl-tRNA aminoacylation	biological_process	1	1	Cluster-31803.75298
GO:0030942	endoplasmic reticulum signal peptide binding	molecular_function	1	1	Cluster-31803.26254
GO:0006084	acetyl-CoA metabolic process	biological_process	1	2	Cluster-31803.59602,Cluster-31803.40957
GO:0044765	single-organism transport	biological_process	1	127	Cluster-31803.29543,Cluster-31803.10715,Cluster-31803.45214,Cluster-31803.23780,Cluster-31803.75438,Cluster-31803.13295,Cluster-31803.23749,Cluster-31803.35624,Cluster-31803.24020,Cluster-31803.54240,Cluster-31803.55854,Cluster-31803.21799,Cluster-31803.100697,Cluster-31803.101418,Cluster-31803.65639,Cluster-31803.57662,Cluster-31803.59364,Cluster-31803.55475,Cluster-31803.77209,Cluster-31803.454…
GO:0016973	poly(A)+ mRNA export from nucleus	biological_process	1	2	Cluster-31803.45214,Cluster-31803.48798
GO:0006448	regulation of translational elongation	biological_process	1	4	Cluster-31803.75298,Cluster-31803.40334,Cluster-31803.53273,Cluster-31803.95747
GO:0010043	response to zinc ion	biological_process	1	1	Cluster-31803.46994
GO:0006367	transcription initiation from RNA polymerase II promoter	biological_process	1	24	Cluster-31803.61564,Cluster-31803.39118,Cluster-31803.64617,Cluster-31803.31069,Cluster-31803.54117,Cluster-31803.21799,Cluster-31803.69296,Cluster-31803.46340,Cluster-31803.64612,Cluster-31803.83180,Cluster-31803.64605,Cluster-31803.7700,Cluster-31803.74871,Cluster-31803.36923,Cluster-31803.97871,Cluster-31803.45483,Cluster-31803.90956,Cluster-31803.46767,Cluster-31803.57530,Cluster-31803.56122,…
GO:0003922	GMP synthase (glutamine-hydrolyzing) activity	molecular_function	1	1	Cluster-31803.38042
GO:0006177	GMP biosynthetic process	biological_process	1	1	Cluster-31803.38042
GO:0046037	GMP metabolic process	biological_process	1	1	Cluster-31803.38042
GO:0016433	rRNA (adenine) methyltransferase activity	molecular_function	1	1	Cluster-31803.39022
GO:0019054	modulation by virus of host process	biological_process	1	6	Cluster-31803.64563,Cluster-31803.43520,Cluster-31803.69296,Cluster-31803.95113,Cluster-31803.30091,Cluster-31803.46675
GO:0044068	modulation by symbiont of host cellular process	biological_process	1	6	Cluster-31803.43520,Cluster-31803.69296,Cluster-31803.64563,Cluster-31803.46675,Cluster-31803.30091,Cluster-31803.95113
GO:0030243	cellulose metabolic process	biological_process	1	2	Cluster-31803.103378,Cluster-31803.103379
GO:0006414	translational elongation	biological_process	1	4	Cluster-31803.53273,Cluster-31803.40334,Cluster-31803.75298,Cluster-31803.95747
GO:0004635	phosphoribosyl-AMP cyclohydrolase activity	molecular_function	1	1	Cluster-31803.80840
GO:0034061	DNA polymerase activity	molecular_function	1	10	Cluster-31803.39186,Cluster-31803.58329,Cluster-31803.58994,Cluster-31803.39821,Cluster-31803.100020,Cluster-31803.69139,Cluster-31803.55854,Cluster-31803.71701,Cluster-31803.62576,Cluster-31803.41140
GO:0016559	peroxisome fission	biological_process	1	1	Cluster-31803.33595
GO:0016020	membrane	cellular_component	1	235	Cluster-31803.40265,Cluster-31803.10715,Cluster-31803.79266,Cluster-31803.63151,Cluster-31803.23780,Cluster-31803.35624,Cluster-31803.23749,Cluster-31803.75438,Cluster-31803.95022,Cluster-31803.67031,Cluster-31803.26007,Cluster-31803.24020,Cluster-31803.100697,Cluster-31803.65639,Cluster-31803.57662,Cluster-31803.88544,Cluster-31803.64971,Cluster-31803.48726,Cluster-31803.77209,Cluster-31803.4200…
GO:0009416	response to light stimulus	biological_process	1	2	Cluster-31803.67069,Cluster-31803.101354
GO:0005047	signal recognition particle binding	molecular_function	1	4	Cluster-31803.26254,Cluster-31803.31653,Cluster-31803.90956,Cluster-31803.75518
GO:0004222	metalloendopeptidase activity	molecular_function	1	11	Cluster-31803.62748,Cluster-31803.42219,Cluster-31803.13126,Cluster-31803.74400,Cluster-31803.33376,Cluster-31803.74328,Cluster-31803.55243,Cluster-31803.88388,Cluster-31803.60007,Cluster-31803.108977,Cluster-31803.61564
GO:0009651	response to salt stress	biological_process	1	1	Cluster-31803.46994
GO:0097367	carbohydrate derivative binding	molecular_function	1	146	Cluster-31803.70281,Cluster-31803.31653,Cluster-31803.9845,Cluster-31803.75298,Cluster-31803.20011,Cluster-31803.57530,Cluster-31803.50590,Cluster-31803.15580,Cluster-31803.74328,Cluster-31803.53879,Cluster-31803.37116,Cluster-31803.15455,Cluster-31803.40334,Cluster-31803.13763,Cluster-31803.44112,Cluster-31803.98649,Cluster-31803.65440,Cluster-31803.75445,Cluster-31803.29294,Cluster-31803.36923,…
GO:0070925	organelle assembly	biological_process	1	6	Cluster-31803.74462,Cluster-31803.25826,Cluster-31803.62576,Cluster-31803.71701,Cluster-31803.41140,Cluster-31803.25822
GO:0051607	defense response to virus	biological_process	1	4	Cluster-31803.91237,Cluster-31803.41140,Cluster-31803.47890,Cluster-31803.71701
GO:0022804	active transmembrane transporter activity	molecular_function	1	19	Cluster-31803.92232,Cluster-31803.23780,Cluster-31803.65414,Cluster-31803.31171,Cluster-31803.56331,Cluster-31803.105483,Cluster-31803.69005,Cluster-31803.44112,Cluster-31803.68814,Cluster-31803.16576,Cluster-31803.74434,Cluster-31803.101533,Cluster-31803.59214,Cluster-31803.54463,Cluster-31803.36429,Cluster-31803.74400,Cluster-31803.44058,Cluster-31803.61888,Cluster-31803.59222
GO:0009678	hydrogen-translocating pyrophosphatase activity	molecular_function	1	1	Cluster-31803.74400
GO:0003676	nucleic acid binding	molecular_function	1	167	Cluster-31803.75849,Cluster-31803.26254,Cluster-31803.31653,Cluster-31803.41140,Cluster-31803.70281,Cluster-31803.20011,Cluster-31803.51706,Cluster-31803.67069,Cluster-31803.15455,Cluster-31803.72117,Cluster-31803.82844,Cluster-31803.53879,Cluster-31803.76092,Cluster-31803.25899,Cluster-31803.26272,Cluster-31803.40334,Cluster-31803.90461,Cluster-31803.65426,Cluster-31803.36923,Cluster-31803.93098…
GO:0007218	neuropeptide signaling pathway	biological_process	1	5	Cluster-31803.55243,Cluster-31803.29237,Cluster-31803.43254,Cluster-31803.61564,Cluster-31803.60007
GO:0033539	fatty acid beta-oxidation using acyl-CoA dehydrogenase	biological_process	1	1	Cluster-31803.76193
GO:0051701	interaction with host	biological_process	1	13	Cluster-31803.45498,Cluster-31803.88544,Cluster-31803.95113,Cluster-31803.62576,Cluster-31803.71701,Cluster-31803.64563,Cluster-31803.41140,Cluster-31803.43520,Cluster-31803.69296,Cluster-31803.6659,Cluster-31803.46675,Cluster-31803.86324,Cluster-31803.30091
GO:0051861	glycolipid binding	molecular_function	1	1	Cluster-31803.92931
GO:0009070	serine family amino acid biosynthetic process	biological_process	1	3	Cluster-31803.38855,Cluster-31803.69742,Cluster-31803.71782
GO:0006750	glutathione biosynthetic process	biological_process	1	2	Cluster-31803.51447,Cluster-31803.29590
GO:0032879	regulation of localization	biological_process	1	5	Cluster-31803.86324,Cluster-31803.100697,Cluster-31803.43520,Cluster-31803.105902,Cluster-31803.90956
GO:0006406	mRNA export from nucleus	biological_process	1	3	Cluster-31803.48798,Cluster-31803.45214,Cluster-31803.93098
GO:0071166	ribonucleoprotein complex localization	biological_process	1	3	Cluster-31803.45214,Cluster-31803.48798,Cluster-31803.93098
GO:0071426	ribonucleoprotein complex export from nucleus	biological_process	1	3	Cluster-31803.93098,Cluster-31803.48798,Cluster-31803.45214
GO:0071427	mRNA-containing ribonucleoprotein complex export from nucleus	biological_process	1	3	Cluster-31803.93098,Cluster-31803.48798,Cluster-31803.45214
GO:0004674	protein serine/threonine kinase activity	molecular_function	1	14	Cluster-31803.44038,Cluster-31803.9845,Cluster-31803.87059,Cluster-31803.42103,Cluster-31803.95642,Cluster-31803.79056,Cluster-31803.40265,Cluster-31803.15005,Cluster-31803.108237,Cluster-31803.45694,Cluster-31803.46305,Cluster-31803.40663,Cluster-31803.68033,Cluster-31803.66591
GO:0009289	pilus	cellular_component	1	1	Cluster-31803.42340
GO:0046999	regulation of conjugation	biological_process	1	2	Cluster-31803.15683,Cluster-31803.59911
GO:0006405	RNA export from nucleus	biological_process	1	3	Cluster-31803.93098,Cluster-31803.48798,Cluster-31803.45214
GO:1902555	endoribonuclease complex	cellular_component	1	2	Cluster-31803.66090,Cluster-31803.7700
GO:0004499	N,N-dimethylaniline monooxygenase activity	molecular_function	1	2	Cluster-31803.69335,Cluster-31803.66090
GO:0051049	regulation of transport	biological_process	1	4	Cluster-31803.86324,Cluster-31803.105902,Cluster-31803.90956,Cluster-31803.100697
GO:0009451	RNA modification	biological_process	1	25	Cluster-31803.51240,Cluster-31803.88081,Cluster-31803.44422,Cluster-31803.107323,Cluster-31803.102494,Cluster-31803.54524,Cluster-31803.39022,Cluster-31803.38204,Cluster-31803.55044,Cluster-31803.79189,Cluster-31803.87789,Cluster-31803.67031,Cluster-31803.18502,Cluster-31803.77902,Cluster-31803.72458,Cluster-31803.25254,Cluster-31803.46795,Cluster-31803.80548,Cluster-31803.30779,Cluster-31803.130…
GO:0048511	rhythmic process	biological_process	1	2	Cluster-31803.94002,Cluster-31803.101311
GO:0003689	DNA clamp loader activity	molecular_function	1	1	Cluster-31803.38106
GO:0005663	DNA replication factor C complex	cellular_component	1	1	Cluster-31803.38106
GO:0033170	protein-DNA loading ATPase activity	molecular_function	1	1	Cluster-31803.38106
GO:0051168	nuclear export	biological_process	1	3	Cluster-31803.45214,Cluster-31803.48798,Cluster-31803.93098
GO:0016812	hydrolase activity, acting on carbon-nitrogen (but not peptide) bonds, in cyclic amides	molecular_function	1	1	Cluster-31803.73246
GO:0004373	glycogen (starch) synthase activity	molecular_function	1	1	Cluster-31803.74549
GO:0019184	nonribosomal peptide biosynthetic process	biological_process	1	2	Cluster-31803.29590,Cluster-31803.51447
GO:0006970	response to osmotic stress	biological_process	1	1	Cluster-31803.46994
GO:0031965	nuclear membrane	cellular_component	1	3	Cluster-31803.43812,Cluster-31803.93098,Cluster-31803.43813
GO:0044272	sulfur compound biosynthetic process	biological_process	1	7	Cluster-31803.51447,Cluster-31803.40957,Cluster-31803.69742,Cluster-31803.29590,Cluster-31803.38855,Cluster-31803.99504,Cluster-31803.59602
GO:0000276	mitochondrial proton-transporting ATP synthase complex, coupling factor F(o)	cellular_component	1	2	Cluster-31803.70958,Cluster-31803.76092
GO:0006796	phosphate-containing compound metabolic process	biological_process	1	101	Cluster-31803.87059,Cluster-31803.44038,Cluster-31803.54712,Cluster-31803.74400,Cluster-31803.71782,Cluster-31803.45484,Cluster-31803.36206,Cluster-31803.77209,Cluster-31803.64574,Cluster-31803.55475,Cluster-31803.54423,Cluster-31803.14138,Cluster-31803.70958,Cluster-31803.93526,Cluster-31803.84665,Cluster-31803.97871,Cluster-31803.100697,Cluster-31803.24311,Cluster-31803.100522,Cluster-31803.576…
GO:0004852	uroporphyrinogen-III synthase activity	molecular_function	1	1	Cluster-31803.38855
GO:0003942	N-acetyl-gamma-glutamyl-phosphate reductase activity	molecular_function	1	1	Cluster-31803.64155
GO:0005786	signal recognition particle, endoplasmic reticulum targeting	cellular_component	1	4	Cluster-31803.90956,Cluster-31803.75518,Cluster-31803.26254,Cluster-31803.31653
GO:0004725	protein tyrosine phosphatase activity	molecular_function	1	4	Cluster-31803.24311,Cluster-31803.100522,Cluster-31803.75133,Cluster-31803.45055
GO:0006102	isocitrate metabolic process	biological_process	1	1	Cluster-31803.46994
GO:1901681	sulfur compound binding	molecular_function	1	7	Cluster-31803.61564,Cluster-31803.67675,Cluster-31803.45214,Cluster-31803.55243,Cluster-31803.48798,Cluster-31803.91237,Cluster-31803.43520
GO:0003933	GTP cyclohydrolase activity	molecular_function	1	1	Cluster-31803.88544
GO:0042822	pyridoxal phosphate metabolic process	biological_process	1	2	Cluster-31803.45484,Cluster-31803.45486
GO:0042823	pyridoxal phosphate biosynthetic process	biological_process	1	2	Cluster-31803.45486,Cluster-31803.45484
GO:0046184	aldehyde biosynthetic process	biological_process	1	2	Cluster-31803.45484,Cluster-31803.45486
GO:0046483	heterocycle metabolic process	biological_process	1	263	Cluster-31803.66090,Cluster-31803.37899,Cluster-31803.99504,Cluster-31803.56122,Cluster-31803.38106,Cluster-31803.45498,Cluster-31803.78451,Cluster-31803.38855,Cluster-31803.71617,Cluster-31803.79056,Cluster-31803.60636,Cluster-31803.9569,Cluster-31803.77576,Cluster-31803.54117,Cluster-31803.43048,Cluster-31803.45055,Cluster-31803.55044,Cluster-31803.26998,Cluster-31803.94002,Cluster-31803.40957,…
GO:1902578	single-organism localization	biological_process	1	128	Cluster-31803.72549,Cluster-31803.69543,Cluster-31803.33713,Cluster-31803.96276,Cluster-31803.74400,Cluster-31803.70958,Cluster-31803.55475,Cluster-31803.70952,Cluster-11919.1,Cluster-31803.101418,Cluster-31803.59364,Cluster-31803.55854,Cluster-31803.21799,Cluster-31803.54240,Cluster-31803.13295,Cluster-31803.101533,Cluster-31803.106271,Cluster-31803.48798,Cluster-31803.68945,Cluster-31803.73411,…
GO:0005783	endoplasmic reticulum	cellular_component	1	18	Cluster-31803.77209,Cluster-31803.75518,Cluster-31803.90956,Cluster-31803.31653,Cluster-31803.68814,Cluster-31803.29294,Cluster-31803.55037,Cluster-31803.91237,Cluster-31803.44058,Cluster-31803.30686,Cluster-31803.54238,Cluster-31803.105902,Cluster-31803.76770,Cluster-31803.54240,Cluster-31803.100697,Cluster-31803.61344,Cluster-31803.58685,Cluster-31803.47177
GO:0015095	magnesium ion transmembrane transporter activity	molecular_function	1	2	Cluster-31803.107832,Cluster-31803.33713
GO:0015693	magnesium ion transport	biological_process	1	2	Cluster-31803.107832,Cluster-31803.33713
GO:0004450	isocitrate dehydrogenase (NADP+) activity	molecular_function	1	1	Cluster-31803.46994
GO:0044003	modification by symbiont of host morphology or physiology	biological_process	1	10	Cluster-31803.43520,Cluster-31803.69296,Cluster-31803.64563,Cluster-31803.41140,Cluster-31803.71701,Cluster-31803.62576,Cluster-31803.30091,Cluster-31803.46675,Cluster-31803.45498,Cluster-31803.95113
GO:0051817	modification of morphology or physiology of other organism involved in symbiotic interaction	biological_process	1	10	Cluster-31803.62576,Cluster-31803.71701,Cluster-31803.64563,Cluster-31803.41140,Cluster-31803.69296,Cluster-31803.43520,Cluster-31803.46675,Cluster-31803.30091,Cluster-31803.45498,Cluster-31803.95113
GO:0016740	transferase activity	molecular_function	1	180	Cluster-31803.106125,Cluster-31803.26272,Cluster-31803.103378,Cluster-31803.15455,Cluster-31803.102530,Cluster-31803.40725,Cluster-31803.98711,Cluster-31803.65414,Cluster-31803.82844,Cluster-31803.37116,Cluster-31803.46795,Cluster-31803.52620,Cluster-31803.41951,Cluster-31803.72656,Cluster-31803.84316,Cluster-31803.9845,Cluster-31803.97049,Cluster-31803.45694,Cluster-31803.43254,Cluster-31803.411…
GO:0004612	phosphoenolpyruvate carboxykinase (ATP) activity	molecular_function	1	1	Cluster-31803.53354
GO:0044764	multi-organism cellular process	biological_process	1	35	Cluster-31803.74993,Cluster-31803.63631,Cluster-31803.71701,Cluster-31803.6659,Cluster-31803.46675,Cluster-31803.86324,Cluster-31803.15683,Cluster-31803.35937,Cluster-31803.59911,Cluster-31803.91237,Cluster-31803.24266,Cluster-31803.46767,Cluster-31803.36206,Cluster-31803.30779,Cluster-31803.41140,Cluster-31803.43520,Cluster-31803.74871,Cluster-31803.97871,Cluster-31803.30091,Cluster-31803.44422,…
GO:0051179	localization	biological_process	1	175	Cluster-31803.73411,Cluster-31803.82761,Cluster-31803.68945,Cluster-31803.48798,Cluster-31803.101533,Cluster-31803.106271,Cluster-31803.39821,Cluster-31803.68814,Cluster-31803.96539,Cluster-31803.110281,Cluster-31803.39101,Cluster-31803.61898,Cluster-31803.90956,Cluster-31803.28588,Cluster-31803.64155,Cluster-31803.75518,Cluster-31803.48759,Cluster-31803.69139,Cluster-31803.31171,Cluster-31803.33…
GO:0002943	tRNA dihydrouridine synthesis	biological_process	1	1	Cluster-31803.79189
GO:0006631	fatty acid metabolic process	biological_process	1	14	Cluster-31803.42029,Cluster-31803.21983,Cluster-31803.26272,Cluster-31803.54712,Cluster-31803.72549,Cluster-31803.54710,Cluster-31803.72329,Cluster-31803.76193,Cluster-31803.46795,Cluster-31803.63151,Cluster-31803.80077,Cluster-31803.52297,Cluster-31803.15683,Cluster-31803.48689
GO:0046148	pigment biosynthetic process	biological_process	1	14	Cluster-31803.77576,Cluster-31803.56122,Cluster-31803.76092,Cluster-31803.45498,Cluster-31803.69518,Cluster-31803.72549,Cluster-31803.91464,Cluster-31803.38855,Cluster-31803.98485,Cluster-31803.24959,Cluster-31803.29666,Cluster-31803.70281,Cluster-31803.4794,Cluster-31803.70958
GO:0048037	cofactor binding	molecular_function	1	47	Cluster-31803.52297,Cluster-31803.25826,Cluster-31803.28588,Cluster-31803.56122,Cluster-31803.66090,Cluster-31803.48798,Cluster-31803.72892,Cluster-31803.103517,Cluster-31803.72213,Cluster-31803.45486,Cluster-31803.80840,Cluster-31803.69335,Cluster-31803.29666,Cluster-31803.46994,Cluster-31803.90853,Cluster-31803.80077,Cluster-31803.57725,Cluster-31803.25822,Cluster-31803.4794,Cluster-31803.54710…
GO:0072521	purine-containing compound metabolic process	biological_process	1	45	Cluster-31803.39022,Cluster-31803.40957,Cluster-31803.47890,Cluster-31803.64167,Cluster-31803.59602,Cluster-31803.48689,Cluster-31803.45055,Cluster-31803.42219,Cluster-31803.77576,Cluster-31803.72674,Cluster-31803.64155,Cluster-31803.36923,Cluster-31803.93098,Cluster-31803.39821,Cluster-31803.62748,Cluster-31803.44058,Cluster-31803.94898,Cluster-31803.38042,Cluster-31803.25539,Cluster-31803.99504…
GO:0043094	cellular metabolic compound salvage	biological_process	1	2	Cluster-31803.67069,Cluster-31803.102530
GO:0072522	purine-containing compound biosynthetic process	biological_process	1	12	Cluster-31803.102530,Cluster-31803.48689,Cluster-31803.81751,Cluster-31803.37116,Cluster-31803.70958,Cluster-31803.47890,Cluster-31803.76092,Cluster-31803.38042,Cluster-31803.25539,Cluster-31803.99504,Cluster-31803.107323,Cluster-31803.47008
GO:0016568	chromatin modification	biological_process	1	6	Cluster-31803.44038,Cluster-31803.27182,Cluster-31803.78451,Cluster-31803.45694,Cluster-31803.78456,Cluster-31803.46305
GO:0016426	tRNA (adenine) methyltransferase activity	molecular_function	1	2	Cluster-31803.18502,Cluster-31803.51240
GO:0016429	tRNA (adenine-N1-)-methyltransferase activity	molecular_function	1	2	Cluster-31803.18502,Cluster-31803.51240
GO:0044237	cellular metabolic process	biological_process	1	389	Cluster-31803.14138,Cluster-31803.47741,Cluster-31803.48726,Cluster-31803.64574,Cluster-31803.53448,Cluster-31803.18502,Cluster-31803.71874,Cluster-31803.57544,Cluster-31803.71782,Cluster-31803.80548,Cluster-31803.98072,Cluster-31803.51248,Cluster-31803.54317,Cluster-31803.63151,Cluster-31803.10715,Cluster-31803.40265,Cluster-31803.26007,Cluster-31803.87789,Cluster-31803.24020,Cluster-31803.23749…
GO:0045095	keratin filament	cellular_component	1	4	Cluster-31803.46994,Cluster-31803.41549,Cluster-31803.35115,Cluster-31803.59464
GO:0030176	integral component of endoplasmic reticulum membrane	cellular_component	1	5	Cluster-31803.90956,Cluster-31803.105902,Cluster-31803.55037,Cluster-31803.100697,Cluster-31803.68814
GO:0004325	ferrochelatase activity	molecular_function	1	1	Cluster-31803.45498
GO:0008176	tRNA (guanine-N7-)-methyltransferase activity	molecular_function	1	3	Cluster-31803.46795,Cluster-31803.39022,Cluster-31803.51240
GO:0004096	catalase activity	molecular_function	1	1	Cluster-31803.64574
GO:0043933	macromolecular complex subunit organization	biological_process	1	29	Cluster-31803.56684,Cluster-31803.79185,Cluster-31803.78456,Cluster-31803.42340,Cluster-31803.47177,Cluster-31803.45024,Cluster-31803.22459,Cluster-31803.52096,Cluster-31803.47890,Cluster-31803.27182,Cluster-31803.71701,Cluster-31803.10715,Cluster-31803.62576,Cluster-31803.24020,Cluster-31803.54463,Cluster-31803.61089,Cluster-31803.91237,Cluster-31803.44038,Cluster-31803.78451,Cluster-31803.12153…
GO:0003006	developmental process involved in reproduction	biological_process	1	11	Cluster-31803.54463,Cluster-31803.62748,Cluster-31803.46795,Cluster-31803.15545,Cluster-31803.83110,Cluster-31803.68598,Cluster-31803.72458,Cluster-31803.54211,Cluster-31803.92817,Cluster-31803.44221,Cluster-31803.45632
GO:0044434	chloroplast part	cellular_component	1	2	Cluster-31803.24959,Cluster-31803.67069
GO:0051260	protein homooligomerization	biological_process	1	2	Cluster-31803.22459,Cluster-31803.19238
GO:0043189	H4/H2A histone acetyltransferase complex	cellular_component	1	1	Cluster-31803.77933
GO:1902562	H4 histone acetyltransferase complex	cellular_component	1	1	Cluster-31803.77933
GO:0046500	S-adenosylmethionine metabolic process	biological_process	1	5	Cluster-31803.38204,Cluster-31803.99504,Cluster-31803.51240,Cluster-31803.18502,Cluster-31803.39022
GO:0006066	alcohol metabolic process	biological_process	1	6	Cluster-31803.21942,Cluster-31803.21555,Cluster-31803.77576,Cluster-31803.26296,Cluster-31803.9888,Cluster-31803.98965
GO:0044435	plastid part	cellular_component	1	2	Cluster-31803.24959,Cluster-31803.67069
GO:0030259	lipid glycosylation	biological_process	1	1	Cluster-31803.58128
GO:0046789	host cell surface receptor binding	molecular_function	1	1	Cluster-31803.29294
GO:0006352	DNA-templated transcription, initiation	biological_process	1	27	Cluster-31803.45483,Cluster-31803.90956,Cluster-31803.74549,Cluster-31803.95433,Cluster-31803.74871,Cluster-31803.97871,Cluster-31803.36923,Cluster-31803.65936,Cluster-31803.62959,Cluster-31803.64597,Cluster-31803.57530,Cluster-31803.46767,Cluster-31803.56122,Cluster-31803.36206,Cluster-31803.69296,Cluster-31803.61564,Cluster-31803.39118,Cluster-31803.64617,Cluster-31803.54117,Cluster-31803.21799…
GO:0009941	chloroplast envelope	cellular_component	1	1	Cluster-31803.67069
GO:0005912	adherens junction	cellular_component	1	1	Cluster-31803.54463
GO:0005924	cell-substrate adherens junction	cellular_component	1	1	Cluster-31803.54463
GO:0005925	focal adhesion	cellular_component	1	1	Cluster-31803.54463
GO:0030055	cell-substrate junction	cellular_component	1	1	Cluster-31803.54463
GO:0070161	anchoring junction	cellular_component	1	1	Cluster-31803.54463
GO:0006575	cellular modified amino acid metabolic process	biological_process	1	20	Cluster-31803.38204,Cluster-31803.29666,Cluster-31803.46994,Cluster-31803.4794,Cluster-31803.51447,Cluster-31803.39022,Cluster-31803.37116,Cluster-31803.54710,Cluster-31803.26272,Cluster-31803.51240,Cluster-31803.29590,Cluster-31803.107323,Cluster-31803.52297,Cluster-31803.77209,Cluster-31803.99504,Cluster-31803.71782,Cluster-31803.46795,Cluster-31803.45498,Cluster-31803.18502,Cluster-31803.54712
GO:0010035	response to inorganic substance	biological_process	1	6	Cluster-31803.46994,Cluster-31803.48074,Cluster-31803.91237,Cluster-31803.24959,Cluster-31803.48726,Cluster-31803.15979
GO:0008757	S-adenosylmethionine-dependent methyltransferase activity	molecular_function	1	11	Cluster-31803.55044,Cluster-31803.38204,Cluster-31803.87027,Cluster-31803.91701,Cluster-31803.39022,Cluster-31803.9498,Cluster-31803.46795,Cluster-31803.25254,Cluster-31803.41446,Cluster-31803.51240,Cluster-31803.18502
GO:0005637	nuclear inner membrane	cellular_component	1	2	Cluster-31803.43812,Cluster-31803.43813
GO:0005639	integral component of nuclear inner membrane	cellular_component	1	2	Cluster-31803.43812,Cluster-31803.43813
GO:0031229	intrinsic component of nuclear inner membrane	cellular_component	1	2	Cluster-31803.43813,Cluster-31803.43812
GO:0044453	nuclear membrane part	cellular_component	1	2	Cluster-31803.43812,Cluster-31803.43813
GO:0006782	protoporphyrinogen IX biosynthetic process	biological_process	1	1	Cluster-31803.24959
GO:0046501	protoporphyrinogen IX metabolic process	biological_process	1	1	Cluster-31803.24959
GO:0044781	bacterial-type flagellum organization	biological_process	1	2	Cluster-31803.25826,Cluster-31803.25822
GO:0004489	methylenetetrahydrofolate reductase (NAD(P)H) activity	molecular_function	1	1	Cluster-31803.45498
GO:0009653	anatomical structure morphogenesis	biological_process	1	15	Cluster-31803.41951,Cluster-31803.68598,Cluster-31803.83110,Cluster-31803.74462,Cluster-31803.46795,Cluster-31803.15545,Cluster-31803.25903,Cluster-31803.54463,Cluster-31803.45632,Cluster-31803.92817,Cluster-31803.62576,Cluster-31803.54211,Cluster-31803.71701,Cluster-31803.41140,Cluster-31803.91716
GO:0033743	peptide-methionine (R)-S-oxide reductase activity	molecular_function	1	1	Cluster-31803.26296
GO:0009526	plastid envelope	cellular_component	1	1	Cluster-31803.67069
GO:0035821	modification of morphology or physiology of other organism	biological_process	1	10	Cluster-31803.46675,Cluster-31803.30091,Cluster-31803.62576,Cluster-31803.71701,Cluster-31803.41140,Cluster-31803.64563,Cluster-31803.69296,Cluster-31803.43520,Cluster-31803.95113,Cluster-31803.45498
GO:0016866	intramolecular transferase activity	molecular_function	1	7	Cluster-31803.71467,Cluster-31803.67031,Cluster-31803.80548,Cluster-31803.93098,Cluster-31803.72458,Cluster-31803.44221,Cluster-31803.57530
GO:0008170	N-methyltransferase activity	molecular_function	1	5	Cluster-31803.79448,Cluster-31803.91701,Cluster-31803.102494,Cluster-31803.55044,Cluster-31803.39022
GO:0004190	aspartic-type endopeptidase activity	molecular_function	1	17	Cluster-31803.31080,Cluster-31803.43576,Cluster-31803.70206,Cluster-31803.82761,Cluster-31803.36206,Cluster-31803.23568,Cluster-31803.56122,Cluster-31803.36429,Cluster-31803.91237,Cluster-31803.40472,Cluster-31803.108977,Cluster-31803.31069,Cluster-31803.26998,Cluster-31803.80182,Cluster-31803.58685,Cluster-31803.101418,Cluster-31803.43580
GO:0070001	aspartic-type peptidase activity	molecular_function	1	17	Cluster-31803.31080,Cluster-31803.43576,Cluster-31803.70206,Cluster-31803.82761,Cluster-31803.36206,Cluster-31803.23568,Cluster-31803.56122,Cluster-31803.36429,Cluster-31803.91237,Cluster-31803.40472,Cluster-31803.108977,Cluster-31803.31069,Cluster-31803.26998,Cluster-31803.80182,Cluster-31803.58685,Cluster-31803.101418,Cluster-31803.43580
GO:0009982	pseudouridine synthase activity	molecular_function	1	5	Cluster-31803.80548,Cluster-31803.67031,Cluster-31803.93098,Cluster-31803.72458,Cluster-31803.44221
GO:0051347	positive regulation of transferase activity	biological_process	1	1	Cluster-31803.67069
GO:0015932	nucleobase-containing compound transmembrane transporter activity	molecular_function	1	2	Cluster-31803.68945,Cluster-31803.40772
GO:0030515	snoRNA binding	molecular_function	1	1	Cluster-31803.77902
GO:0009987	cellular process	biological_process	1	477	Cluster-31803.69982,Cluster-31803.80077,Cluster-31803.68033,Cluster-31803.25822,Cluster-31803.47890,Cluster-31803.4794,Cluster-31803.15005,Cluster-31803.41445,Cluster-31803.54524,Cluster-31803.35115,Cluster-31803.22459,Cluster-31803.48009,Cluster-31803.91464,Cluster-31803.29294,Cluster-31803.60827,Cluster-31803.65440,Cluster-31803.54211,Cluster-31803.25826,Cluster-31803.44058,Cluster-31803.19238,…
GO:0030131	clathrin adaptor complex	cellular_component	1	3	Cluster-31803.47890,Cluster-31803.23736,Cluster-31803.8008
GO:0005351	sugar:proton symporter activity	molecular_function	1	2	Cluster-31803.36429,Cluster-31803.92232
GO:0006558	L-phenylalanine metabolic process	biological_process	1	6	Cluster-31803.15741,Cluster-31803.96358,Cluster-31803.82070,Cluster-31803.107323,Cluster-31803.32149,Cluster-31803.46305
GO:1902221	erythrose 4-phosphate/phosphoenolpyruvate family amino acid metabolic process	biological_process	1	6	Cluster-31803.32149,Cluster-31803.46305,Cluster-31803.15741,Cluster-31803.96358,Cluster-31803.107323,Cluster-31803.82070
GO:0070838	divalent metal ion transport	biological_process	1	12	Cluster-31803.93098,Cluster-31803.54240,Cluster-31803.54236,Cluster-31803.45483,Cluster-31803.105902,Cluster-31803.35654,Cluster-31803.90956,Cluster-31803.14245,Cluster-31803.33713,Cluster-31803.100697,Cluster-31803.54463,Cluster-31803.107832
GO:0007166	cell surface receptor signaling pathway	biological_process	1	11	Cluster-31803.65630,Cluster-31803.95642,Cluster-31803.23170,Cluster-31803.9845,Cluster-31803.81384,Cluster-31803.89812,Cluster-31803.45055,Cluster-31803.15005,Cluster-31803.79266,Cluster-31803.75445,Cluster-31803.70281
GO:0004448	isocitrate dehydrogenase activity	molecular_function	1	1	Cluster-31803.46994
GO:0015295	solute:proton symporter activity	molecular_function	1	2	Cluster-31803.36429,Cluster-31803.92232
GO:0000166	nucleotide binding	molecular_function	1	170	Cluster-31803.84665,Cluster-31803.77209,Cluster-31803.48726,Cluster-31803.28776,Cluster-31803.98072,Cluster-31803.30686,Cluster-31803.58700,Cluster-31803.39379,Cluster-31803.87059,Cluster-31803.71874,Cluster-31803.46675,Cluster-31803.95022,Cluster-31803.26007,Cluster-31803.62104,Cluster-31803.87789,Cluster-31803.24020,Cluster-31803.10715,Cluster-31803.40265,Cluster-31803.79266,Cluster-31803.64971…
GO:1901265	nucleoside phosphate binding	molecular_function	1	170	Cluster-31803.29666,Cluster-31803.59602,Cluster-31803.76770,Cluster-31803.39015,Cluster-31803.79832,Cluster-31803.81384,Cluster-31803.41973,Cluster-31803.52297,Cluster-31803.39821,Cluster-31803.75518,Cluster-31803.64155,Cluster-31803.28588,Cluster-31803.90956,Cluster-31803.65630,Cluster-31803.68257,Cluster-31803.45486,Cluster-31803.97746,Cluster-31803.55854,Cluster-31803.66143,Cluster-31803.51447…
GO:0016877	ligase activity, forming carbon-sulfur bonds	molecular_function	1	4	Cluster-31803.40957,Cluster-31803.59602,Cluster-31803.35115,Cluster-31803.41549
GO:0001836	release of cytochrome c from mitochondria	biological_process	1	2	Cluster-31803.38204,Cluster-31803.15545
GO:0008637	apoptotic mitochondrial changes	biological_process	1	2	Cluster-31803.38204,Cluster-31803.15545
GO:0097190	apoptotic signaling pathway	biological_process	1	2	Cluster-31803.38204,Cluster-31803.15545
GO:0009411	response to UV	biological_process	1	1	Cluster-31803.101354
GO:0015698	inorganic anion transport	biological_process	1	7	Cluster-31803.69139,Cluster-31803.56331,Cluster-31803.59222,Cluster-31803.29237,Cluster-31803.59214,Cluster-31803.58329,Cluster-31803.43490
GO:0005507	copper ion binding	molecular_function	1	7	Cluster-31803.50040,Cluster-31803.46994,Cluster-31803.70281,Cluster-31803.22010,Cluster-31803.79723,Cluster-31803.69518,Cluster-31803.41396
GO:0016893	endonuclease activity, active with either ribo- or deoxyribonucleic acids and producing 5'-phosphomonoesters	molecular_function	1	6	Cluster-31803.7700,Cluster-31803.66090,Cluster-31803.35115,Cluster-31803.41549,Cluster-31803.74308,Cluster-31803.32222
GO:0008677	2-dehydropantoate 2-reductase activity	molecular_function	1	5	Cluster-31803.54712,Cluster-31803.29666,Cluster-31803.54710,Cluster-31803.52297,Cluster-31803.46795
GO:0009011	starch synthase activity	molecular_function	1	1	Cluster-31803.95433
GO:0003856	3-dehydroquinate synthase activity	molecular_function	1	1	Cluster-31803.82070
GO:0001503	ossification	biological_process	1	2	Cluster-31803.92051,Cluster-31803.58994
GO:0047869	dimethylpropiothetin dethiomethylase activity	molecular_function	1	1	Cluster-31803.95113
GO:0044462	external encapsulating structure part	cellular_component	1	2	Cluster-31803.63151,Cluster-31803.87481
GO:0034637	cellular carbohydrate biosynthetic process	biological_process	1	5	Cluster-31803.39118,Cluster-31803.95433,Cluster-31803.74549,Cluster-31803.103378,Cluster-31803.103379
GO:0045892	negative regulation of transcription, DNA-templated	biological_process	1	3	Cluster-31803.101311,Cluster-31803.90853,Cluster-31803.94002
GO:0051253	negative regulation of RNA metabolic process	biological_process	1	3	Cluster-31803.94002,Cluster-31803.90853,Cluster-31803.101311
GO:1902679	negative regulation of RNA biosynthetic process	biological_process	1	3	Cluster-31803.101311,Cluster-31803.90853,Cluster-31803.94002
GO:1903507	negative regulation of nucleic acid-templated transcription	biological_process	1	3	Cluster-31803.101311,Cluster-31803.90853,Cluster-31803.94002
GO:0046812	host cell surface binding	molecular_function	1	1	Cluster-31803.29294
GO:0010851	cyclase regulator activity	molecular_function	1	1	Cluster-31803.53854
GO:0010853	cyclase activator activity	molecular_function	1	1	Cluster-31803.53854
GO:0030249	guanylate cyclase regulator activity	molecular_function	1	1	Cluster-31803.53854
GO:0030250	guanylate cyclase activator activity	molecular_function	1	1	Cluster-31803.53854
GO:0042710	biofilm formation	biological_process	1	2	Cluster-31803.36923,Cluster-31803.46767
GO:0001871	pattern binding	molecular_function	1	5	Cluster-31803.26985,Cluster-31803.57662,Cluster-31803.23780,Cluster-31803.90372,Cluster-31803.75872
GO:0030247	polysaccharide binding	molecular_function	1	5	Cluster-31803.26985,Cluster-31803.57662,Cluster-31803.75872,Cluster-31803.23780,Cluster-31803.90372
GO:0008236	serine-type peptidase activity	molecular_function	1	22	Cluster-31803.43254,Cluster-31803.68814,Cluster-31803.7833,Cluster-31803.65489,Cluster-31803.45483,Cluster-31803.48074,Cluster-31803.23568,Cluster-31803.36206,Cluster-31803.91237,Cluster-31803.72213,Cluster-31803.45498,Cluster-31803.86324,Cluster-31803.87481,Cluster-31803.40352,Cluster-31803.23780,Cluster-31803.63151,Cluster-31803.15368,Cluster-31803.77576,Cluster-31803.83180,Cluster-31803.100398…
GO:0017171	serine hydrolase activity	molecular_function	1	22	Cluster-31803.77576,Cluster-31803.15368,Cluster-31803.83180,Cluster-31803.100398,Cluster-31803.31416,Cluster-31803.22126,Cluster-31803.86324,Cluster-31803.87481,Cluster-31803.40352,Cluster-31803.23780,Cluster-31803.63151,Cluster-31803.23568,Cluster-31803.48074,Cluster-31803.36206,Cluster-31803.72213,Cluster-31803.45498,Cluster-31803.91237,Cluster-31803.68814,Cluster-31803.43254,Cluster-31803.7833…
GO:0016668	oxidoreductase activity, acting on a sulfur group of donors, NAD(P) as acceptor	molecular_function	1	2	Cluster-31803.76193,Cluster-31803.48726
GO:0034654	nucleobase-containing compound biosynthetic process	biological_process	1	131	Cluster-31803.31214,Cluster-31803.83180,Cluster-31803.58375,Cluster-31803.47177,Cluster-31803.48694,Cluster-31803.52096,Cluster-31803.27182,Cluster-31803.54117,Cluster-31803.94002,Cluster-31803.78451,Cluster-31803.99504,Cluster-31803.56122,Cluster-31803.9569,Cluster-31803.71617,Cluster-31803.81673,Cluster-31803.86873,Cluster-31803.47008,Cluster-31803.107323,Cluster-31803.64612,Cluster-31803.85714…
GO:0033588	Elongator holoenzyme complex	cellular_component	1	1	Cluster-31803.71481
GO:0031227	intrinsic component of endoplasmic reticulum membrane	cellular_component	1	5	Cluster-31803.105902,Cluster-31803.90956,Cluster-31803.100697,Cluster-31803.55037,Cluster-31803.68814
GO:0005667	transcription factor complex	cellular_component	1	61	Cluster-31803.31653,Cluster-31803.85955,Cluster-31803.95433,Cluster-31803.74549,Cluster-31803.97871,Cluster-31803.30779,Cluster-31803.42009,Cluster-31803.45483,Cluster-31803.57530,Cluster-31803.46767,Cluster-31803.45484,Cluster-31803.36206,Cluster-31803.33578,Cluster-31803.91237,Cluster-31803.62959,Cluster-31803.91219,Cluster-31803.23170,Cluster-31803.64597,Cluster-31803.61564,Cluster-31803.39118…
GO:0044451	nucleoplasm part	cellular_component	1	44	Cluster-31803.94002,Cluster-31803.26998,Cluster-31803.69982,Cluster-31803.101311,Cluster-31803.27182,Cluster-31803.52096,Cluster-31803.69296,Cluster-31803.7700,Cluster-31803.83180,Cluster-31803.36923,Cluster-31803.93098,Cluster-31803.90956,Cluster-31803.56122,Cluster-31803.106118,Cluster-31803.78451,Cluster-31803.65936,Cluster-31803.42029,Cluster-31803.38106,Cluster-31803.77933,Cluster-31803.6156…
GO:0005654	nucleoplasm	cellular_component	1	44	Cluster-31803.69296,Cluster-31803.52096,Cluster-31803.27182,Cluster-31803.101311,Cluster-31803.69982,Cluster-31803.26998,Cluster-31803.94002,Cluster-31803.83180,Cluster-31803.7700,Cluster-31803.90956,Cluster-31803.93098,Cluster-31803.36923,Cluster-31803.77933,Cluster-31803.38106,Cluster-31803.78451,Cluster-31803.65936,Cluster-31803.42029,Cluster-31803.106118,Cluster-31803.56122,Cluster-31803.5171…
GO:2001070	starch binding	molecular_function	1	4	Cluster-31803.75872,Cluster-31803.90372,Cluster-31803.57662,Cluster-31803.26985
GO:0006955	immune response	biological_process	1	7	Cluster-31803.41140,Cluster-31803.27182,Cluster-31803.23780,Cluster-31803.53393,Cluster-31803.81410,Cluster-31803.71701,Cluster-31803.45055
GO:0006023	aminoglycan biosynthetic process	biological_process	1	4	Cluster-31803.101505,Cluster-31803.9120,Cluster-31803.69518,Cluster-31803.54211
GO:0005869	dynactin complex	cellular_component	1	1	Cluster-31803.76770
GO:0050897	cobalt ion binding	molecular_function	1	1	Cluster-31803.30091
GO:0030278	regulation of ossification	biological_process	1	1	Cluster-31803.92051
GO:0006730	one-carbon metabolic process	biological_process	1	4	Cluster-31803.71782,Cluster-31803.37600,Cluster-31803.4794,Cluster-31803.59210
GO:0016070	RNA metabolic process	biological_process	1	167	Cluster-31803.79189,Cluster-31803.64605,Cluster-31803.25899,Cluster-31803.26272,Cluster-31803.31653,Cluster-31803.26254,Cluster-31803.41140,Cluster-31803.57530,Cluster-31803.46795,Cluster-31803.52171,Cluster-31803.67069,Cluster-31803.75298,Cluster-31803.69982,Cluster-31803.55859,Cluster-31803.39022,Cluster-31803.25822,Cluster-31803.41445,Cluster-31803.54524,Cluster-31803.35115,Cluster-31803.85230…
GO:0009089	lysine biosynthetic process via diaminopimelate	biological_process	1	3	Cluster-31803.76193,Cluster-31803.25822,Cluster-31803.25826
GO:0046451	diaminopimelate metabolic process	biological_process	1	3	Cluster-31803.76193,Cluster-31803.25822,Cluster-31803.25826
GO:0000105	histidine biosynthetic process	biological_process	1	3	Cluster-31803.93526,Cluster-31803.93525,Cluster-31803.80840
GO:0003917	DNA topoisomerase type I activity	molecular_function	1	1	Cluster-31803.38656
GO:0016646	oxidoreductase activity, acting on the CH-NH group of donors, NAD or NADP as acceptor	molecular_function	1	4	Cluster-31803.71782,Cluster-31803.77209,Cluster-31803.4794,Cluster-31803.45498
GO:0015276	ligand-gated ion channel activity	molecular_function	1	7	Cluster-31803.93098,Cluster-31803.54240,Cluster-31803.45483,Cluster-31803.54463,Cluster-31803.35654,Cluster-31803.54236,Cluster-31803.105554
GO:0022834	ligand-gated channel activity	molecular_function	1	7	Cluster-31803.93098,Cluster-31803.54240,Cluster-31803.45483,Cluster-31803.35654,Cluster-31803.54463,Cluster-31803.105554,Cluster-31803.54236
GO:0044763	single-organism cellular process	biological_process	1	312	Cluster-31803.35115,Cluster-31803.54524,Cluster-31803.91464,Cluster-31803.48009,Cluster-31803.68033,Cluster-31803.80077,Cluster-31803.47890,Cluster-31803.25822,Cluster-31803.4794,Cluster-31803.15005,Cluster-31803.94898,Cluster-31803.44058,Cluster-31803.62748,Cluster-31803.61089,Cluster-31803.80840,Cluster-31803.55037,Cluster-31803.29294,Cluster-31803.65440,Cluster-31803.25826,Cluster-31803.54211,…
GO:0010256	endomembrane system organization	biological_process	1	3	Cluster-31803.76770,Cluster-31803.93098,Cluster-31803.29294
GO:0004751	ribose-5-phosphate isomerase activity	molecular_function	1	1	Cluster-31803.101533
GO:0009052	pentose-phosphate shunt, non-oxidative branch	biological_process	1	1	Cluster-31803.101533
GO:0010496	intercellular transport	biological_process	1	1	Cluster-31803.86324
GO:0044000	movement in host	biological_process	1	1	Cluster-31803.86324
GO:0046739	transport of virus in multicellular host	biological_process	1	1	Cluster-31803.86324
GO:0046740	transport of virus in host, cell to cell	biological_process	1	1	Cluster-31803.86324
GO:0051814	movement in other organism involved in symbiotic interaction	biological_process	1	1	Cluster-31803.86324
GO:1902586	multi-organism intercellular transport	biological_process	1	1	Cluster-31803.86324
GO:0004867	serine-type endopeptidase inhibitor activity	molecular_function	1	4	Cluster-31803.55243,Cluster-31803.20011,Cluster-31803.60007,Cluster-31803.61564
GO:0005665	DNA-directed RNA polymerase II, core complex	cellular_component	1	2	Cluster-31803.51719,Cluster-31803.15368
GO:1901607	alpha-amino acid biosynthetic process	biological_process	1	19	Cluster-31803.93526,Cluster-31803.77209,Cluster-31803.25826,Cluster-31803.82070,Cluster-31803.54211,Cluster-31803.28776,Cluster-31803.71782,Cluster-31803.76193,Cluster-31803.38855,Cluster-31803.67069,Cluster-31803.75298,Cluster-31803.33595,Cluster-31803.80840,Cluster-31803.4794,Cluster-31803.25822,Cluster-31803.93525,Cluster-31803.107323,Cluster-31803.69518,Cluster-31803.69742
GO:0052689	carboxylic ester hydrolase activity	molecular_function	1	7	Cluster-31803.9809,Cluster-31803.105582,Cluster-31803.75298,Cluster-31803.52171,Cluster-31803.36206,Cluster-31803.75133,Cluster-31803.51248
GO:0032774	RNA biosynthetic process	biological_process	1	118	Cluster-31803.106118,Cluster-31803.73411,Cluster-31803.27077,Cluster-31803.38042,Cluster-31803.6639,Cluster-31803.58994,Cluster-31803.48754,Cluster-31803.42029,Cluster-31803.100020,Cluster-31803.44221,Cluster-31803.39801,Cluster-31803.90956,Cluster-31803.103557,Cluster-31803.32161,Cluster-31803.59478,Cluster-31803.55874,Cluster-31803.39186,Cluster-31803.7700,Cluster-31803.58128,Cluster-31803.4442…
GO:0050385	ureidoglycolate lyase activity	molecular_function	1	1	Cluster-31803.13827
GO:0043207	response to external biotic stimulus	biological_process	1	12	Cluster-31803.46994,Cluster-31803.47890,Cluster-31803.66724,Cluster-31803.47741,Cluster-31803.41140,Cluster-31803.27182,Cluster-31803.71701,Cluster-31803.86310,Cluster-31803.88544,Cluster-31803.91237,Cluster-31803.69742,Cluster-31803.85230
GO:0051707	response to other organism	biological_process	1	12	Cluster-31803.91237,Cluster-31803.69742,Cluster-31803.85230,Cluster-31803.88544,Cluster-31803.86310,Cluster-31803.47741,Cluster-31803.41140,Cluster-31803.27182,Cluster-31803.47890,Cluster-31803.66724,Cluster-31803.71701,Cluster-31803.46994
GO:0071822	protein complex subunit organization	biological_process	1	22	Cluster-31803.91237,Cluster-31803.61089,Cluster-31803.54463,Cluster-31803.12153,Cluster-31803.49084,Cluster-31803.19238,Cluster-31803.102830,Cluster-31803.41140,Cluster-31803.42009,Cluster-31803.55475,Cluster-31803.56684,Cluster-31803.79185,Cluster-31803.22459,Cluster-31803.45024,Cluster-31803.42340,Cluster-31803.47177,Cluster-31803.52096,Cluster-31803.47890,Cluster-31803.10715,Cluster-31803.6257…
GO:0004817	cysteine-tRNA ligase activity	molecular_function	1	1	Cluster-31803.51122
GO:0006423	cysteinyl-tRNA aminoacylation	biological_process	1	1	Cluster-31803.51122
GO:0009108	coenzyme biosynthetic process	biological_process	1	20	Cluster-31803.54712,Cluster-31803.45486,Cluster-31803.99504,Cluster-31803.45484,Cluster-31803.46795,Cluster-31803.71782,Cluster-31803.55475,Cluster-31803.77209,Cluster-31803.52297,Cluster-31803.107323,Cluster-31803.71481,Cluster-31803.69005,Cluster-31803.54710,Cluster-31803.4794,Cluster-31803.40957,Cluster-31803.37116,Cluster-31803.87789,Cluster-31803.15455,Cluster-31803.59602,Cluster-31803.29666
GO:0009986	cell surface	cellular_component	1	1	Cluster-31803.29294
GO:0004018	N6-(1,2-dicarboxyethyl)AMP AMP-lyase (fumarate-forming) activity	molecular_function	1	1	Cluster-31803.25539
GO:0019842	vitamin binding	molecular_function	1	7	Cluster-31803.55243,Cluster-31803.48798,Cluster-31803.45214,Cluster-31803.63895,Cluster-31803.43520,Cluster-31803.61564,Cluster-31803.67675
GO:0034641	cellular nitrogen compound metabolic process	biological_process	1	279	Cluster-31803.28776,Cluster-31803.36206,Cluster-31803.33578,Cluster-31803.46681,Cluster-31803.34484,Cluster-31803.58329,Cluster-31803.44038,Cluster-31803.62959,Cluster-31803.95433,Cluster-31803.77209,Cluster-31803.59210,Cluster-31803.42009,Cluster-31803.54423,Cluster-31803.45483,Cluster-31803.15368,Cluster-31803.57662,Cluster-31803.88544,Cluster-31803.78456,Cluster-31803.62795,Cluster-31803.65639…
GO:0016634	oxidoreductase activity, acting on the CH-CH group of donors, oxygen as acceptor	molecular_function	1	2	Cluster-31803.80077,Cluster-31803.63151
GO:0006662	glycerol ether metabolic process	biological_process	1	1	Cluster-31803.56206
GO:0018904	ether metabolic process	biological_process	1	1	Cluster-31803.56206
GO:0000156	phosphorelay response regulator activity	molecular_function	1	1	Cluster-31803.105582
GO:0004565	beta-galactosidase activity	molecular_function	1	2	Cluster-31803.62016,Cluster-31803.54317
GO:0009341	beta-galactosidase complex	cellular_component	1	2	Cluster-31803.54317,Cluster-31803.62016
GO:0042278	purine nucleoside metabolic process	biological_process	1	28	Cluster-31803.39821,Cluster-31803.55475,Cluster-31803.77209,Cluster-31803.72674,Cluster-31803.70958,Cluster-31803.38042,Cluster-31803.57530,Cluster-31803.74400,Cluster-31803.44058,Cluster-31803.99504,Cluster-31803.48966,Cluster-31803.62748,Cluster-31803.18502,Cluster-31803.38204,Cluster-31803.102530,Cluster-31803.59602,Cluster-31803.37116,Cluster-31803.47890,Cluster-31803.39022,Cluster-31803.4095…
GO:0046128	purine ribonucleoside metabolic process	biological_process	1	28	Cluster-31803.47008,Cluster-31803.107323,Cluster-31803.42219,Cluster-31803.51240,Cluster-31803.21942,Cluster-31803.76092,Cluster-31803.57662,Cluster-31803.77576,Cluster-31803.39022,Cluster-31803.40957,Cluster-31803.47890,Cluster-31803.37116,Cluster-31803.59602,Cluster-31803.102530,Cluster-31803.38204,Cluster-31803.18502,Cluster-31803.62748,Cluster-31803.48966,Cluster-31803.99504,Cluster-31803.440…
GO:0006189	'de novo' IMP biosynthetic process	biological_process	1	2	Cluster-31803.107323,Cluster-31803.48689
GO:0006022	aminoglycan metabolic process	biological_process	1	6	Cluster-31803.9120,Cluster-31803.101505,Cluster-31803.54317,Cluster-31803.54211,Cluster-31803.62016,Cluster-31803.69518
GO:0031704	apelin receptor binding	molecular_function	1	2	Cluster-31803.47741,Cluster-31803.96355
GO:0042451	purine nucleoside biosynthetic process	biological_process	1	9	Cluster-31803.99504,Cluster-31803.38042,Cluster-31803.76092,Cluster-31803.47008,Cluster-31803.107323,Cluster-31803.102530,Cluster-31803.70958,Cluster-31803.47890,Cluster-31803.37116
GO:0046129	purine ribonucleoside biosynthetic process	biological_process	1	9	Cluster-31803.37116,Cluster-31803.70958,Cluster-31803.47890,Cluster-31803.102530,Cluster-31803.107323,Cluster-31803.47008,Cluster-31803.38042,Cluster-31803.76092,Cluster-31803.99504
GO:0051188	cofactor biosynthetic process	biological_process	1	28	Cluster-31803.77209,Cluster-31803.55475,Cluster-31803.70958,Cluster-31803.30091,Cluster-31803.52297,Cluster-31803.38855,Cluster-31803.45486,Cluster-31803.54712,Cluster-31803.45498,Cluster-31803.46795,Cluster-31803.45484,Cluster-31803.71782,Cluster-31803.99504,Cluster-31803.37116,Cluster-31803.40957,Cluster-31803.4794,Cluster-31803.29666,Cluster-31803.59602,Cluster-31803.15455,Cluster-31803.87789,…
GO:0042995	cell projection	cellular_component	1	12	Cluster-31803.30323,Cluster-31803.41140,Cluster-31803.79723,Cluster-31803.62576,Cluster-31803.71701,Cluster-31803.29294,Cluster-31803.91237,Cluster-31803.23170,Cluster-31803.13827,Cluster-31803.98613,Cluster-31803.42340,Cluster-31803.45024
GO:0016860	intramolecular oxidoreductase activity	molecular_function	1	3	Cluster-31803.30686,Cluster-31803.101533,Cluster-31803.93525
GO:0046486	glycerolipid metabolic process	biological_process	1	14	Cluster-31803.64574,Cluster-31803.77209,Cluster-31803.105902,Cluster-31803.14138,Cluster-31803.65440,Cluster-31803.95022,Cluster-31803.41549,Cluster-31803.62016,Cluster-31803.100697,Cluster-31803.9809,Cluster-31803.54317,Cluster-31803.35115,Cluster-31803.36206,Cluster-31803.32535
GO:0043414	macromolecule methylation	biological_process	1	11	Cluster-31803.102494,Cluster-31803.25254,Cluster-31803.79448,Cluster-31803.88081,Cluster-31803.51240,Cluster-31803.18502,Cluster-31803.81384,Cluster-31803.38204,Cluster-31803.13030,Cluster-31803.31080,Cluster-31803.39022
GO:0030154	cell differentiation	biological_process	1	12	Cluster-31803.54463,Cluster-31803.15545,Cluster-31803.46795,Cluster-31803.83110,Cluster-31803.68598,Cluster-31803.72458,Cluster-31803.91716,Cluster-31803.92051,Cluster-31803.54211,Cluster-31803.92817,Cluster-31803.45632,Cluster-31803.44221
GO:0015937	coenzyme A biosynthetic process	biological_process	1	2	Cluster-31803.107323,Cluster-31803.37116
GO:0033866	nucleoside bisphosphate biosynthetic process	biological_process	1	2	Cluster-31803.37116,Cluster-31803.107323
GO:0034030	ribonucleoside bisphosphate biosynthetic process	biological_process	1	2	Cluster-31803.107323,Cluster-31803.37116
GO:0034033	purine nucleoside bisphosphate biosynthetic process	biological_process	1	2	Cluster-31803.37116,Cluster-31803.107323
GO:0071855	neuropeptide receptor binding	molecular_function	1	2	Cluster-31803.47741,Cluster-31803.96355
GO:0016051	carbohydrate biosynthetic process	biological_process	1	14	Cluster-31803.53354,Cluster-31803.41446,Cluster-31803.103378,Cluster-31803.21942,Cluster-31803.77576,Cluster-31803.57530,Cluster-31803.44058,Cluster-31803.103379,Cluster-31803.39022,Cluster-31803.40957,Cluster-31803.59602,Cluster-31803.95433,Cluster-31803.74549,Cluster-31803.39118
GO:0002376	immune system process	biological_process	1	9	Cluster-31803.47890,Cluster-31803.23780,Cluster-31803.41140,Cluster-31803.27182,Cluster-31803.71701,Cluster-31803.53393,Cluster-31803.45055,Cluster-31803.91237,Cluster-31803.81410
GO:0008092	cytoskeletal protein binding	molecular_function	1	32	Cluster-31803.15545,Cluster-31803.24266,Cluster-31803.9845,Cluster-31803.91237,Cluster-31803.58329,Cluster-31803.67028,Cluster-31803.57786,Cluster-31803.55475,Cluster-31803.55397,Cluster-31803.98613,Cluster-31803.15368,Cluster-31803.56206,Cluster-31803.65639,Cluster-31803.105905,Cluster-31803.90461,Cluster-31803.86324,Cluster-31803.51447,Cluster-31803.51122,Cluster-31803.79266,Cluster-31803.36831…
GO:0003989	acetyl-CoA carboxylase activity	molecular_function	1	1	Cluster-31803.72329
GO:0016421	CoA carboxylase activity	molecular_function	1	1	Cluster-31803.72329
GO:0045934	negative regulation of nucleobase-containing compound metabolic process	biological_process	1	3	Cluster-31803.94002,Cluster-31803.90853,Cluster-31803.101311
GO:0006836	neurotransmitter transport	biological_process	1	1	Cluster-31803.40352
GO:0004814	arginine-tRNA ligase activity	molecular_function	1	1	Cluster-31803.84659
GO:0006420	arginyl-tRNA aminoacylation	biological_process	1	1	Cluster-31803.84659
GO:0016853	isomerase activity	molecular_function	1	19	Cluster-31803.71467,Cluster-31803.56331,Cluster-31803.67031,Cluster-31803.86747,Cluster-31803.93525,Cluster-31803.72458,Cluster-31803.30686,Cluster-31803.57530,Cluster-31803.59222,Cluster-31803.80548,Cluster-31803.38656,Cluster-31803.101533,Cluster-31803.57544,Cluster-31803.80840,Cluster-31803.59214,Cluster-31803.54463,Cluster-31803.44221,Cluster-31803.65426,Cluster-31803.93098
GO:0030119	AP-type membrane coat adaptor complex	cellular_component	1	3	Cluster-31803.8008,Cluster-31803.23736,Cluster-31803.47890
GO:0008652	cellular amino acid biosynthetic process	biological_process	1	20	Cluster-31803.25822,Cluster-31803.4794,Cluster-31803.93525,Cluster-31803.69518,Cluster-31803.69742,Cluster-31803.107323,Cluster-31803.64155,Cluster-31803.82070,Cluster-31803.25826,Cluster-31803.77209,Cluster-31803.54211,Cluster-31803.93526,Cluster-31803.80840,Cluster-31803.33595,Cluster-31803.67069,Cluster-31803.38855,Cluster-31803.75298,Cluster-31803.76193,Cluster-31803.71782,Cluster-31803.28776
GO:0016307	phosphatidylinositol phosphate kinase activity	molecular_function	1	1	Cluster-31803.65440
GO:0016881	acid-amino acid ligase activity	molecular_function	1	5	Cluster-31803.101505,Cluster-31803.63296,Cluster-31803.91464,Cluster-31803.29590,Cluster-31803.51447
GO:0016641	oxidoreductase activity, acting on the CH-NH2 group of donors, oxygen as acceptor	molecular_function	1	2	Cluster-31803.45484,Cluster-31803.45486
GO:0032553	ribonucleotide binding	molecular_function	1	138	Cluster-31803.30779,Cluster-31803.81751,Cluster-31803.58015,Cluster-31803.97627,Cluster-31803.50580,Cluster-31803.31635,Cluster-31803.13827,Cluster-31803.79690,Cluster-31803.23170,Cluster-31803.35937,Cluster-31803.46767,Cluster-31803.50894,Cluster-31803.19072,Cluster-31803.66155,Cluster-31803.51122,Cluster-31803.21566,Cluster-31803.56497,Cluster-31803.42103,Cluster-31803.29590,Cluster-31803.71379…
GO:0006855	drug transmembrane transport	biological_process	1	3	Cluster-31803.101533,Cluster-31803.31171,Cluster-31803.61888
GO:0015893	drug transport	biological_process	1	3	Cluster-31803.101533,Cluster-31803.61888,Cluster-31803.31171
GO:0044425	membrane part	cellular_component	1	161	Cluster-31803.40472,Cluster-31803.74434,Cluster-31803.67069,Cluster-31803.43254,Cluster-31803.31653,Cluster-31803.41140,Cluster-31803.32107,Cluster-31803.54236,Cluster-31803.64605,Cluster-31803.44112,Cluster-31803.76092,Cluster-31803.43580,Cluster-31803.56331,Cluster-31803.89812,Cluster-31803.86324,Cluster-31803.74328,Cluster-31803.65414,Cluster-31803.43490,Cluster-31803.63418,Cluster-31803.44058…
GO:0016679	oxidoreductase activity, acting on diphenols and related substances as donors	molecular_function	1	5	Cluster-31803.39821,Cluster-31803.79185,Cluster-31803.62748,Cluster-31803.77209,Cluster-31803.42219
GO:0006629	lipid metabolic process	biological_process	1	50	Cluster-31803.62016,Cluster-31803.56684,Cluster-31803.81410,Cluster-31803.100697,Cluster-31803.26272,Cluster-31803.96909,Cluster-31803.32535,Cluster-31803.45214,Cluster-31803.66143,Cluster-31803.63151,Cluster-31803.95022,Cluster-31803.25438,Cluster-31803.15683,Cluster-31803.72549,Cluster-31803.54712,Cluster-31803.54317,Cluster-31803.36206,Cluster-31803.46795,Cluster-31803.64574,Cluster-31803.7720…
GO:0072511	divalent inorganic cation transport	biological_process	1	12	Cluster-31803.100697,Cluster-31803.107832,Cluster-31803.54463,Cluster-31803.33713,Cluster-31803.54236,Cluster-31803.14245,Cluster-31803.90956,Cluster-31803.35654,Cluster-31803.45483,Cluster-31803.105902,Cluster-31803.54240,Cluster-31803.93098
GO:0043021	ribonucleoprotein complex binding	molecular_function	1	4	Cluster-31803.75518,Cluster-31803.90956,Cluster-31803.31653,Cluster-31803.26254
GO:0008237	metallopeptidase activity	molecular_function	1	12	Cluster-31803.13126,Cluster-31803.74400,Cluster-31803.62748,Cluster-31803.42219,Cluster-31803.108977,Cluster-31803.88388,Cluster-31803.60007,Cluster-31803.61564,Cluster-31803.74328,Cluster-31803.33376,Cluster-31803.50184,Cluster-31803.55243
GO:0006563	L-serine metabolic process	biological_process	1	5	Cluster-31803.86747,Cluster-31803.38855,Cluster-31803.69742,Cluster-31803.84659,Cluster-31803.84665
GO:0004340	glucokinase activity	molecular_function	1	1	Cluster-31803.21942
GO:0004396	hexokinase activity	molecular_function	1	1	Cluster-31803.21942
GO:0004514	nicotinate-nucleotide diphosphorylase (carboxylating) activity	molecular_function	1	1	Cluster-31803.71481
GO:0015238	drug transmembrane transporter activity	molecular_function	1	3	Cluster-31803.31171,Cluster-31803.61888,Cluster-31803.101533
GO:0090484	drug transporter activity	molecular_function	1	3	Cluster-31803.101533,Cluster-31803.61888,Cluster-31803.31171
GO:0015935	small ribosomal subunit	cellular_component	1	1	Cluster-31803.51447
GO:0030203	glycosaminoglycan metabolic process	biological_process	1	5	Cluster-31803.54317,Cluster-31803.101505,Cluster-31803.62016,Cluster-31803.54211,Cluster-31803.69518
GO:0015936	coenzyme A metabolic process	biological_process	1	2	Cluster-31803.37116,Cluster-31803.107323
GO:0008201	heparin binding	molecular_function	1	1	Cluster-31803.91237
GO:0008152	metabolic process	biological_process	1	467	Cluster-31803.54238,Cluster-31803.31635,Cluster-31803.23170,Cluster-31803.79690,Cluster-31803.44702,Cluster-31803.81751,Cluster-31803.92051,Cluster-31803.76844,Cluster-31803.95747,Cluster-31803.21942,Cluster-31803.29590,Cluster-31803.26296,Cluster-31803.32685,Cluster-31803.47008,Cluster-31803.39118,Cluster-31803.61564,Cluster-31803.21566,Cluster-31803.25438,Cluster-31803.51719,Cluster-31803.96358…
GO:0016624	oxidoreductase activity, acting on the aldehyde or oxo group of donors, disulfide as acceptor	molecular_function	1	2	Cluster-31803.45214,Cluster-31803.48798
GO:0002161	aminoacyl-tRNA editing activity	molecular_function	1	2	Cluster-31803.75298,Cluster-31803.52171
GO:0002252	immune effector process	biological_process	1	4	Cluster-31803.71701,Cluster-31803.91237,Cluster-31803.41140,Cluster-31803.47890
GO:0010038	response to metal ion	biological_process	1	3	Cluster-31803.24959,Cluster-31803.15979,Cluster-31803.46994
GO:0030054	cell junction	cellular_component	1	1	Cluster-31803.54463
GO:0009496	plastoquinol--plastocyanin reductase activity	molecular_function	1	1	Cluster-31803.79185
GO:0052880	oxidoreductase activity, acting on diphenols and related substances as donors, with copper protein as acceptor	molecular_function	1	1	Cluster-31803.79185
GO:0004619	phosphoglycerate mutase activity	molecular_function	1	1	Cluster-31803.57530
GO:0006007	glucose catabolic process	biological_process	1	1	Cluster-31803.57530
GO:0019320	hexose catabolic process	biological_process	1	1	Cluster-31803.57530
GO:0009252	peptidoglycan biosynthetic process	biological_process	1	3	Cluster-31803.54211,Cluster-31803.69518,Cluster-31803.101505
GO:0010942	positive regulation of cell death	biological_process	1	2	Cluster-31803.15545,Cluster-31803.38204
GO:0043065	positive regulation of apoptotic process	biological_process	1	2	Cluster-31803.38204,Cluster-31803.15545
GO:0043068	positive regulation of programmed cell death	biological_process	1	2	Cluster-31803.15545,Cluster-31803.38204
GO:0006784	heme a biosynthetic process	biological_process	1	1	Cluster-31803.77576
GO:0046160	heme a metabolic process	biological_process	1	1	Cluster-31803.77576
GO:0004719	protein-L-isoaspartate (D-aspartate) O-methyltransferase activity	molecular_function	1	4	Cluster-31803.51240,Cluster-31803.39022,Cluster-31803.18502,Cluster-31803.38204
GO:0009725	response to hormone	biological_process	1	3	Cluster-31803.51447,Cluster-31803.29590,Cluster-31803.38855
GO:0042440	pigment metabolic process	biological_process	1	14	Cluster-31803.77576,Cluster-31803.56122,Cluster-31803.76092,Cluster-31803.91464,Cluster-31803.38855,Cluster-31803.98485,Cluster-31803.24959,Cluster-31803.45498,Cluster-31803.69518,Cluster-31803.72549,Cluster-31803.29666,Cluster-31803.70958,Cluster-31803.70281,Cluster-31803.4794
GO:0070008	serine-type exopeptidase activity	molecular_function	1	5	Cluster-31803.45498,Cluster-31803.63151,Cluster-31803.91237,Cluster-31803.77576,Cluster-31803.43254
GO:0008033	tRNA processing	biological_process	1	26	Cluster-31803.41549,Cluster-31803.91701,Cluster-31803.31080,Cluster-31803.29294,Cluster-31803.48726,Cluster-31803.30779,Cluster-31803.56122,Cluster-31803.46795,Cluster-31803.66090,Cluster-31803.41446,Cluster-31803.72549,Cluster-31803.18502,Cluster-31803.55044,Cluster-31803.46675,Cluster-31803.29666,Cluster-31803.79189,Cluster-31803.87789,Cluster-31803.39022,Cluster-31803.52096,Cluster-31803.7700,…
GO:0030599	pectinesterase activity	molecular_function	1	1	Cluster-31803.51248
GO:0042545	cell wall modification	biological_process	1	1	Cluster-31803.51248
GO:0004888	transmembrane signaling receptor activity	molecular_function	1	8	Cluster-31803.9845,Cluster-31803.65630,Cluster-31803.79266,Cluster-31803.105554,Cluster-31803.75445,Cluster-31803.81384,Cluster-31803.62104,Cluster-31803.40297
GO:0010827	regulation of glucose transport	biological_process	1	1	Cluster-31803.86324
GO:0010829	negative regulation of glucose transport	biological_process	1	1	Cluster-31803.86324
GO:0015758	glucose transport	biological_process	1	1	Cluster-31803.86324
GO:0046323	glucose import	biological_process	1	1	Cluster-31803.86324
GO:0046324	regulation of glucose import	biological_process	1	1	Cluster-31803.86324
GO:0046325	negative regulation of glucose import	biological_process	1	1	Cluster-31803.86324
GO:0044403	symbiosis, encompassing mutualism through parasitism	biological_process	1	32	Cluster-31803.62576,Cluster-31803.69296,Cluster-31803.39022,Cluster-31803.69335,Cluster-31803.54117,Cluster-31803.44422,Cluster-31803.77576,Cluster-31803.79185,Cluster-31803.64563,Cluster-31803.41973,Cluster-31803.29294,Cluster-31803.41446,Cluster-31803.101533,Cluster-31803.45498,Cluster-31803.58994,Cluster-31803.95113,Cluster-31803.71701,Cluster-31803.86324,Cluster-31803.6659,Cluster-31803.46675…
GO:0006351	transcription, DNA-templated	biological_process	1	116	Cluster-31803.23170,Cluster-31803.67069,Cluster-31803.57530,Cluster-31803.46767,Cluster-31803.72458,Cluster-31803.41140,Cluster-31803.30779,Cluster-31803.46305,Cluster-31803.31653,Cluster-31803.85955,Cluster-31803.74871,Cluster-31803.86873,Cluster-31803.81673,Cluster-31803.25899,Cluster-31803.26272,Cluster-31803.64605,Cluster-31803.64612,Cluster-31803.85714,Cluster-31803.71701,Cluster-31803.51719…
GO:0097659	nucleic acid-templated transcription	biological_process	1	116	Cluster-31803.33359,Cluster-31803.55854,Cluster-31803.21799,Cluster-31803.75438,Cluster-31803.62795,Cluster-31803.59364,Cluster-31803.78456,Cluster-31803.46340,Cluster-31803.15368,Cluster-31803.69518,Cluster-31803.101418,Cluster-31803.65639,Cluster-31803.62016,Cluster-31803.56684,Cluster-31803.51240,Cluster-31803.81410,Cluster-31803.45854,Cluster-31803.97871,Cluster-31803.74549,Cluster-31803.9543…
GO:0006664	glycolipid metabolic process	biological_process	1	9	Cluster-31803.54317,Cluster-31803.35115,Cluster-31803.36206,Cluster-31803.32535,Cluster-31803.62016,Cluster-31803.95022,Cluster-31803.41549,Cluster-31803.77209,Cluster-31803.14138
GO:0016053	organic acid biosynthetic process	biological_process	1	30	Cluster-31803.54710,Cluster-31803.107323,Cluster-31803.69518,Cluster-31803.69742,Cluster-31803.29666,Cluster-31803.37116,Cluster-31803.4794,Cluster-31803.25822,Cluster-31803.93525,Cluster-31803.28776,Cluster-31803.72329,Cluster-31803.71782,Cluster-31803.76193,Cluster-31803.46795,Cluster-31803.38855,Cluster-31803.67069,Cluster-31803.75298,Cluster-31803.42029,Cluster-31803.21983,Cluster-31803.80840…
GO:0046394	carboxylic acid biosynthetic process	biological_process	1	30	Cluster-31803.54710,Cluster-31803.69518,Cluster-31803.69742,Cluster-31803.107323,Cluster-31803.29666,Cluster-31803.4794,Cluster-31803.25822,Cluster-31803.93525,Cluster-31803.37116,Cluster-31803.76193,Cluster-31803.46795,Cluster-31803.71782,Cluster-31803.28776,Cluster-31803.72329,Cluster-31803.21983,Cluster-31803.80840,Cluster-31803.33595,Cluster-31803.72549,Cluster-31803.54712,Cluster-31803.67069…
GO:0009127	purine nucleoside monophosphate biosynthetic process	biological_process	1	8	Cluster-31803.76092,Cluster-31803.38042,Cluster-31803.25539,Cluster-31803.107323,Cluster-31803.47008,Cluster-31803.48689,Cluster-31803.47890,Cluster-31803.70958
GO:0009168	purine ribonucleoside monophosphate biosynthetic process	biological_process	1	8	Cluster-31803.47890,Cluster-31803.70958,Cluster-31803.48689,Cluster-31803.107323,Cluster-31803.47008,Cluster-31803.76092,Cluster-31803.38042,Cluster-31803.25539
GO:0006027	glycosaminoglycan catabolic process	biological_process	1	2	Cluster-31803.62016,Cluster-31803.54317
GO:0046365	monosaccharide catabolic process	biological_process	1	1	Cluster-31803.57530
GO:0000150	recombinase activity	molecular_function	1	1	Cluster-31803.67675
GO:0006325	chromatin organization	biological_process	1	6	Cluster-31803.78456,Cluster-31803.45694,Cluster-31803.46305,Cluster-31803.44038,Cluster-31803.27182,Cluster-31803.78451
GO:0004749	ribose phosphate diphosphokinase activity	molecular_function	1	1	Cluster-31803.102530
GO:0010883	regulation of lipid storage	biological_process	1	1	Cluster-31803.43520
GO:0010884	positive regulation of lipid storage	biological_process	1	1	Cluster-31803.43520
GO:0045454	cell redox homeostasis	biological_process	1	8	Cluster-31803.65426,Cluster-31803.59210,Cluster-31803.48074,Cluster-31803.64541,Cluster-31803.64542,Cluster-31803.23463,Cluster-31803.8555,Cluster-31803.56206
GO:0000030	mannosyltransferase activity	molecular_function	1	1	Cluster-31803.104362
GO:0000136	alpha-1,6-mannosyltransferase complex	cellular_component	1	1	Cluster-31803.104362
GO:0000137	Golgi cis cisterna	cellular_component	1	1	Cluster-31803.104362
GO:0031501	mannosyltransferase complex	cellular_component	1	1	Cluster-31803.104362
GO:0006164	purine nucleotide biosynthetic process	biological_process	1	10	Cluster-31803.107323,Cluster-31803.47008,Cluster-31803.38042,Cluster-31803.76092,Cluster-31803.25539,Cluster-31803.81751,Cluster-31803.37116,Cluster-31803.70958,Cluster-31803.47890,Cluster-31803.48689
GO:1901700	response to oxygen-containing compound	biological_process	1	4	Cluster-31803.91237,Cluster-31803.48726,Cluster-31803.68814,Cluster-31803.48074
GO:0016854	racemase and epimerase activity	molecular_function	1	3	Cluster-31803.59214,Cluster-31803.56331,Cluster-31803.59222
GO:0003333	amino acid transmembrane transport	biological_process	1	4	Cluster-31803.42913,Cluster-31803.70958,Cluster-31803.76092,Cluster-31803.70952
GO:0004146	dihydrofolate reductase activity	molecular_function	1	2	Cluster-31803.77209,Cluster-31803.71782
GO:0006761	dihydrofolate biosynthetic process	biological_process	1	2	Cluster-31803.71782,Cluster-31803.77209
GO:0046452	dihydrofolate metabolic process	biological_process	1	2	Cluster-31803.71782,Cluster-31803.77209
GO:0015939	pantothenate metabolic process	biological_process	1	7	Cluster-31803.29666,Cluster-31803.54710,Cluster-31803.52297,Cluster-31803.46795,Cluster-31803.37116,Cluster-31803.107323,Cluster-31803.54712
GO:0015940	pantothenate biosynthetic process	biological_process	1	7	Cluster-31803.107323,Cluster-31803.37116,Cluster-31803.54712,Cluster-31803.54710,Cluster-31803.29666,Cluster-31803.46795,Cluster-31803.52297
GO:0005342	organic acid transmembrane transporter activity	molecular_function	1	4	Cluster-31803.76092,Cluster-31803.70952,Cluster-31803.42913,Cluster-31803.70958
GO:0046943	carboxylic acid transmembrane transporter activity	molecular_function	1	4	Cluster-31803.70958,Cluster-31803.42913,Cluster-31803.70952,Cluster-31803.76092
GO:0005643	nuclear pore	cellular_component	1	4	Cluster-31803.24266,Cluster-31803.5552,Cluster-31803.45214,Cluster-31803.48798
GO:0006749	glutathione metabolic process	biological_process	1	4	Cluster-31803.46994,Cluster-31803.29590,Cluster-31803.51447,Cluster-31803.26272
GO:0050852	T cell receptor signaling pathway	biological_process	1	1	Cluster-31803.45055
GO:0009126	purine nucleoside monophosphate metabolic process	biological_process	1	23	Cluster-31803.62748,Cluster-31803.48966,Cluster-31803.25539,Cluster-31803.57530,Cluster-31803.38042,Cluster-31803.74400,Cluster-31803.44058,Cluster-31803.70958,Cluster-31803.55475,Cluster-31803.77209,Cluster-31803.72674,Cluster-31803.39821,Cluster-31803.47008,Cluster-31803.107323,Cluster-31803.42219,Cluster-31803.21942,Cluster-31803.77576,Cluster-31803.76092,Cluster-31803.57662,Cluster-31803.4789…
GO:0009167	purine ribonucleoside monophosphate metabolic process	biological_process	1	23	Cluster-31803.47008,Cluster-31803.42219,Cluster-31803.107323,Cluster-31803.21942,Cluster-31803.57662,Cluster-31803.76092,Cluster-31803.77576,Cluster-31803.40957,Cluster-31803.47890,Cluster-31803.59602,Cluster-31803.48689,Cluster-31803.62748,Cluster-31803.48966,Cluster-31803.25539,Cluster-31803.44058,Cluster-31803.57530,Cluster-31803.74400,Cluster-31803.38042,Cluster-31803.70958,Cluster-31803.7720…
GO:0004451	isocitrate lyase activity	molecular_function	1	1	Cluster-31803.58329
GO:0005929	cilium	cellular_component	1	9	Cluster-31803.29294,Cluster-31803.71701,Cluster-31803.62576,Cluster-31803.79723,Cluster-31803.41140,Cluster-31803.45024,Cluster-31803.98613,Cluster-31803.23170,Cluster-31803.91237
GO:0008645	hexose transport	biological_process	1	1	Cluster-31803.86324
GO:0003779	actin binding	molecular_function	1	23	Cluster-31803.60827,Cluster-31803.67028,Cluster-31803.55397,Cluster-31803.75445,Cluster-31803.57786,Cluster-31803.24266,Cluster-31803.83172,Cluster-31803.36831,Cluster-31803.73411,Cluster-31803.65630,Cluster-31803.99504,Cluster-31803.15545,Cluster-31803.58329,Cluster-31803.98965,Cluster-31803.9845,Cluster-31803.86324,Cluster-31803.79266,Cluster-31803.51122,Cluster-31803.44676,Cluster-31803.15368,…
GO:0031985	Golgi cisterna	cellular_component	1	1	Cluster-31803.104362
GO:0016868	intramolecular transferase activity, phosphotransferases	molecular_function	1	2	Cluster-31803.57530,Cluster-31803.71467
GO:0016042	lipid catabolic process	biological_process	1	5	Cluster-31803.9809,Cluster-31803.63151,Cluster-31803.80077,Cluster-31803.76193,Cluster-31803.36206
GO:0051704	multi-organism process	biological_process	1	77	Cluster-31803.88544,Cluster-31803.57662,Cluster-31803.68598,Cluster-31803.32535,Cluster-31803.45214,Cluster-31803.63151,Cluster-31803.45632,Cluster-31803.46675,Cluster-31803.6659,Cluster-31803.67031,Cluster-31803.69543,Cluster-31803.59911,Cluster-31803.23568,Cluster-31803.24266,Cluster-31803.83110,Cluster-31803.36206,Cluster-31803.43520,Cluster-31803.47741,Cluster-31803.97871,Cluster-31803.44422,…
GO:0006166	purine ribonucleoside salvage	biological_process	1	1	Cluster-31803.102530
GO:0008284	positive regulation of cell proliferation	biological_process	1	1	Cluster-31803.43520
GO:0009847	spore germination	biological_process	1	1	Cluster-31803.70289
GO:0016810	hydrolase activity, acting on carbon-nitrogen (but not peptide) bonds	molecular_function	1	11	Cluster-31803.88267,Cluster-31803.11135,Cluster-31803.21799,Cluster-31803.78451,Cluster-31803.25899,Cluster-31803.80840,Cluster-31803.73246,Cluster-31803.96276,Cluster-31803.42340,Cluster-31803.88544,Cluster-31803.78456
GO:0051051	negative regulation of transport	biological_process	1	1	Cluster-31803.86324
GO:0009719	response to endogenous stimulus	biological_process	1	3	Cluster-31803.29590,Cluster-31803.38855,Cluster-31803.51447
GO:0005789	endoplasmic reticulum membrane	cellular_component	1	12	Cluster-31803.75518,Cluster-31803.77209,Cluster-31803.90956,Cluster-31803.76770,Cluster-31803.105902,Cluster-31803.31653,Cluster-31803.68814,Cluster-31803.55037,Cluster-31803.100697,Cluster-31803.44058,Cluster-31803.30686,Cluster-31803.58685
GO:0016783	sulfurtransferase activity	molecular_function	1	1	Cluster-31803.57725
GO:0044419	interspecies interaction between organisms	biological_process	1	32	Cluster-31803.71701,Cluster-31803.86324,Cluster-31803.46675,Cluster-31803.6659,Cluster-31803.74993,Cluster-31803.88544,Cluster-31803.63631,Cluster-31803.30779,Cluster-31803.43520,Cluster-31803.41140,Cluster-31803.74871,Cluster-31803.30091,Cluster-31803.35937,Cluster-31803.91237,Cluster-31803.24266,Cluster-31803.36206,Cluster-31803.62576,Cluster-31803.69296,Cluster-31803.39022,Cluster-31803.69335,…
GO:0042175	nuclear outer membrane-endoplasmic reticulum membrane network	cellular_component	1	12	Cluster-31803.100697,Cluster-31803.55037,Cluster-31803.30686,Cluster-31803.58685,Cluster-31803.44058,Cluster-31803.76770,Cluster-31803.105902,Cluster-31803.90956,Cluster-31803.77209,Cluster-31803.75518,Cluster-31803.68814,Cluster-31803.31653
GO:0002429	immune response-activating cell surface receptor signaling pathway	biological_process	1	1	Cluster-31803.45055
GO:0002757	immune response-activating signal transduction	biological_process	1	1	Cluster-31803.45055
GO:0002764	immune response-regulating signaling pathway	biological_process	1	1	Cluster-31803.45055
GO:0002768	immune response-regulating cell surface receptor signaling pathway	biological_process	1	1	Cluster-31803.45055
GO:0050851	antigen receptor-mediated signaling pathway	biological_process	1	1	Cluster-31803.45055
GO:0006417	regulation of translation	biological_process	1	11	Cluster-31803.75298,Cluster-31803.62016,Cluster-31803.40334,Cluster-31803.53273,Cluster-31803.42340,Cluster-31803.54317,Cluster-31803.95747,Cluster-31803.58375,Cluster-31803.45483,Cluster-31803.21566,Cluster-31803.18957
GO:0034248	regulation of cellular amide metabolic process	biological_process	1	11	Cluster-31803.45483,Cluster-31803.18957,Cluster-31803.21566,Cluster-31803.75298,Cluster-31803.62016,Cluster-31803.40334,Cluster-31803.53273,Cluster-31803.42340,Cluster-31803.54317,Cluster-31803.58375,Cluster-31803.95747
GO:0012505	endomembrane system	cellular_component	1	30	Cluster-31803.58685,Cluster-31803.47177,Cluster-31803.61344,Cluster-31803.43812,Cluster-31803.100697,Cluster-31803.54240,Cluster-31803.76770,Cluster-31803.105902,Cluster-31803.25822,Cluster-31803.92232,Cluster-31803.45214,Cluster-31803.54238,Cluster-31803.5552,Cluster-31803.30686,Cluster-31803.43813,Cluster-31803.44058,Cluster-31803.24266,Cluster-31803.91237,Cluster-31803.36429,Cluster-31803.4879…
GO:0004820	glycine-tRNA ligase activity	molecular_function	1	1	Cluster-31803.84659
GO:0006426	glycyl-tRNA aminoacylation	biological_process	1	1	Cluster-31803.84659
GO:0009345	glycine-tRNA ligase complex	cellular_component	1	1	Cluster-31803.84659
GO:0030896	checkpoint clamp complex	cellular_component	1	1	Cluster-31803.23749
GO:0008121	ubiquinol-cytochrome-c reductase activity	molecular_function	1	4	Cluster-31803.77209,Cluster-31803.42219,Cluster-31803.62748,Cluster-31803.39821
GO:0016681	oxidoreductase activity, acting on diphenols and related substances as donors, cytochrome as acceptor	molecular_function	1	4	Cluster-31803.39821,Cluster-31803.62748,Cluster-31803.42219,Cluster-31803.77209
GO:0044038	cell wall macromolecule biosynthetic process	biological_process	1	3	Cluster-31803.101505,Cluster-31803.69518,Cluster-31803.54211
GO:0070589	cellular component macromolecule biosynthetic process	biological_process	1	3	Cluster-31803.101505,Cluster-31803.69518,Cluster-31803.54211
GO:0051239	regulation of multicellular organismal process	biological_process	1	4	Cluster-31803.41951,Cluster-31803.29294,Cluster-31803.92051,Cluster-31803.43520
GO:0007010	cytoskeleton organization	biological_process	1	29	Cluster-31803.44676,Cluster-31803.15368,Cluster-31803.56206,Cluster-31803.105905,Cluster-31803.56684,Cluster-31803.90461,Cluster-31803.86324,Cluster-31803.51122,Cluster-31803.71701,Cluster-31803.79266,Cluster-31803.62576,Cluster-31803.15545,Cluster-31803.36831,Cluster-31803.65630,Cluster-31803.99504,Cluster-31803.73411,Cluster-31803.49084,Cluster-31803.24266,Cluster-31803.83172,Cluster-31803.9845…
GO:0001533	cornified envelope	cellular_component	1	1	Cluster-31803.96158
GO:0044260	cellular macromolecule metabolic process	biological_process	1	296	Cluster-31803.70289,Cluster-31803.59911,Cluster-31803.64597,Cluster-31803.91219,Cluster-31803.13030,Cluster-31803.26197,Cluster-31803.69518,Cluster-31803.101418,Cluster-31803.88081,Cluster-31803.62016,Cluster-31803.21799,Cluster-31803.13295,Cluster-31803.51447,Cluster-31803.75355,Cluster-31803.73411,Cluster-31803.106118,Cluster-31803.77902,Cluster-31803.42029,Cluster-31803.23353,Cluster-31803.398…
GO:0010608	posttranscriptional regulation of gene expression	biological_process	1	11	Cluster-31803.18957,Cluster-31803.21566,Cluster-31803.45483,Cluster-31803.42340,Cluster-31803.54317,Cluster-31803.95747,Cluster-31803.58375,Cluster-31803.62016,Cluster-31803.75298,Cluster-31803.40334,Cluster-31803.53273
GO:0016885	ligase activity, forming carbon-carbon bonds	molecular_function	1	1	Cluster-31803.72329
GO:0010467	gene expression	biological_process	1	184	Cluster-31803.23170,Cluster-31803.46767,Cluster-31803.72458,Cluster-31803.30779,Cluster-31803.46305,Cluster-31803.85955,Cluster-31803.74871,Cluster-31803.53443,Cluster-31803.81673,Cluster-31803.86873,Cluster-31803.29590,Cluster-31803.107323,Cluster-31803.95747,Cluster-31803.64612,Cluster-31803.85714,Cluster-31803.51122,Cluster-31803.71701,Cluster-31803.51719,Cluster-31803.64617,Cluster-31803.3106…
GO:0019915	lipid storage	biological_process	1	1	Cluster-31803.43520
GO:0000079	regulation of cyclin-dependent protein serine/threonine kinase activity	biological_process	1	1	Cluster-31803.106118
GO:0071900	regulation of protein serine/threonine kinase activity	biological_process	1	1	Cluster-31803.106118
GO:1904029	regulation of cyclin-dependent protein kinase activity	biological_process	1	1	Cluster-31803.106118
GO:1903509	liposaccharide metabolic process	biological_process	1	9	Cluster-31803.41549,Cluster-31803.95022,Cluster-31803.77209,Cluster-31803.14138,Cluster-31803.54317,Cluster-31803.32535,Cluster-31803.36206,Cluster-31803.35115,Cluster-31803.62016
GO:0009123	nucleoside monophosphate metabolic process	biological_process	1	24	Cluster-31803.25539,Cluster-31803.71782,Cluster-31803.57530,Cluster-31803.38042,Cluster-31803.74400,Cluster-31803.44058,Cluster-31803.62748,Cluster-31803.48966,Cluster-31803.39821,Cluster-31803.70958,Cluster-31803.55475,Cluster-31803.77209,Cluster-31803.72674,Cluster-31803.21942,Cluster-31803.77576,Cluster-31803.57662,Cluster-31803.76092,Cluster-31803.47008,Cluster-31803.42219,Cluster-31803.10732…
GO:0044255	cellular lipid metabolic process	biological_process	1	36	Cluster-31803.26272,Cluster-31803.62016,Cluster-31803.100697,Cluster-31803.32535,Cluster-31803.63151,Cluster-31803.45214,Cluster-31803.15683,Cluster-31803.95022,Cluster-31803.54712,Cluster-31803.72549,Cluster-31803.46795,Cluster-31803.36206,Cluster-31803.54317,Cluster-31803.14138,Cluster-31803.77209,Cluster-31803.64574,Cluster-31803.30779,Cluster-31803.44422,Cluster-31803.91464,Cluster-31803.3511…
GO:0000270	peptidoglycan metabolic process	biological_process	1	3	Cluster-31803.54211,Cluster-31803.69518,Cluster-31803.101505
GO:0000255	allantoin metabolic process	biological_process	1	1	Cluster-31803.13827
GO:0000256	allantoin catabolic process	biological_process	1	1	Cluster-31803.13827
GO:0042398	cellular modified amino acid biosynthetic process	biological_process	1	13	Cluster-31803.29666,Cluster-31803.52297,Cluster-31803.77209,Cluster-31803.37116,Cluster-31803.4794,Cluster-31803.51447,Cluster-31803.54710,Cluster-31803.99504,Cluster-31803.46795,Cluster-31803.71782,Cluster-31803.29590,Cluster-31803.107323,Cluster-31803.54712
GO:0004799	thymidylate synthase activity	molecular_function	1	1	Cluster-31803.71782
GO:0009607	response to biotic stimulus	biological_process	1	12	Cluster-31803.88544,Cluster-31803.86310,Cluster-31803.85230,Cluster-31803.91237,Cluster-31803.69742,Cluster-31803.46994,Cluster-31803.71701,Cluster-31803.41140,Cluster-31803.27182,Cluster-31803.47741,Cluster-31803.47890,Cluster-31803.66724
GO:0009445	putrescine metabolic process	biological_process	1	1	Cluster-31803.42340
GO:0009446	putrescine biosynthetic process	biological_process	1	1	Cluster-31803.42340
GO:0016298	lipase activity	molecular_function	1	2	Cluster-31803.36206,Cluster-31803.9809
GO:0008430	selenium binding	molecular_function	1	1	Cluster-31803.57544
GO:1902494	catalytic complex	cellular_component	1	82	Cluster-31803.51240,Cluster-31803.62016,Cluster-31803.24311,Cluster-31803.101418,Cluster-31803.46340,Cluster-31803.15368,Cluster-31803.78456,Cluster-31803.23749,Cluster-31803.21799,Cluster-31803.55854,Cluster-31803.58329,Cluster-31803.18502,Cluster-31803.64597,Cluster-31803.62959,Cluster-31803.54317,Cluster-31803.36206,Cluster-31803.48726,Cluster-31803.47741,Cluster-31803.45483,Cluster-31803.9352…
GO:0006547	histidine metabolic process	biological_process	1	3	Cluster-31803.93525,Cluster-31803.80840,Cluster-31803.93526
GO:0052803	imidazole-containing compound metabolic process	biological_process	1	3	Cluster-31803.93525,Cluster-31803.80840,Cluster-31803.93526
GO:0003008	system process	biological_process	1	2	Cluster-31803.9120,Cluster-31803.29294
GO:0009124	nucleoside monophosphate biosynthetic process	biological_process	1	9	Cluster-31803.107323,Cluster-31803.47008,Cluster-31803.38042,Cluster-31803.76092,Cluster-31803.25539,Cluster-31803.71782,Cluster-31803.70958,Cluster-31803.47890,Cluster-31803.48689
GO:0043101	purine-containing compound salvage	biological_process	1	1	Cluster-31803.102530
GO:0003908	methylated-DNA-[protein]-cysteine S-methyltransferase activity	molecular_function	1	1	Cluster-31803.43576
GO:0030118	clathrin coat	cellular_component	1	3	Cluster-31803.47890,Cluster-31803.23736,Cluster-31803.8008
GO:0008661	1-deoxy-D-xylulose-5-phosphate synthase activity	molecular_function	1	2	Cluster-31803.48798,Cluster-31803.45214
GO:0005991	trehalose metabolic process	biological_process	1	2	Cluster-31803.26197,Cluster-31803.20998
GO:0002064	epithelial cell development	biological_process	1	8	Cluster-31803.54211,Cluster-31803.92817,Cluster-31803.45632,Cluster-31803.54463,Cluster-31803.46795,Cluster-31803.15545,Cluster-31803.83110,Cluster-31803.68598
GO:0002065	columnar/cuboidal epithelial cell differentiation	biological_process	1	8	Cluster-31803.45632,Cluster-31803.92817,Cluster-31803.54211,Cluster-31803.68598,Cluster-31803.83110,Cluster-31803.46795,Cluster-31803.15545,Cluster-31803.54463
GO:0002066	columnar/cuboidal epithelial cell development	biological_process	1	8	Cluster-31803.54463,Cluster-31803.46795,Cluster-31803.15545,Cluster-31803.68598,Cluster-31803.83110,Cluster-31803.54211,Cluster-31803.92817,Cluster-31803.45632
GO:0005213	structural constituent of chorion	molecular_function	1	8	Cluster-31803.68598,Cluster-31803.83110,Cluster-31803.46795,Cluster-31803.15545,Cluster-31803.54463,Cluster-31803.45632,Cluster-31803.92817,Cluster-31803.54211
GO:0007292	female gamete generation	biological_process	1	8	Cluster-31803.68598,Cluster-31803.83110,Cluster-31803.15545,Cluster-31803.46795,Cluster-31803.54463,Cluster-31803.45632,Cluster-31803.92817,Cluster-31803.54211
GO:0007304	chorion-containing eggshell formation	biological_process	1	8	Cluster-31803.46795,Cluster-31803.15545,Cluster-31803.83110,Cluster-31803.68598,Cluster-31803.54463,Cluster-31803.92817,Cluster-31803.45632,Cluster-31803.54211
GO:0030703	eggshell formation	biological_process	1	8	Cluster-31803.54211,Cluster-31803.92817,Cluster-31803.45632,Cluster-31803.54463,Cluster-31803.46795,Cluster-31803.15545,Cluster-31803.83110,Cluster-31803.68598
GO:0030707	ovarian follicle cell development	biological_process	1	8	Cluster-31803.92817,Cluster-31803.45632,Cluster-31803.54211,Cluster-31803.46795,Cluster-31803.15545,Cluster-31803.68598,Cluster-31803.83110,Cluster-31803.54463
GO:0048477	oogenesis	biological_process	1	8	Cluster-31803.46795,Cluster-31803.15545,Cluster-31803.68598,Cluster-31803.83110,Cluster-31803.54463,Cluster-31803.92817,Cluster-31803.45632,Cluster-31803.54211
GO:0030855	epithelial cell differentiation	biological_process	1	8	Cluster-31803.92817,Cluster-31803.45632,Cluster-31803.54211,Cluster-31803.15545,Cluster-31803.46795,Cluster-31803.68598,Cluster-31803.83110,Cluster-31803.54463
GO:0006144	purine nucleobase metabolic process	biological_process	1	19	Cluster-31803.93098,Cluster-31803.36923,Cluster-31803.46305,Cluster-31803.64155,Cluster-31803.81751,Cluster-31803.25539,Cluster-31803.46767,Cluster-31803.38042,Cluster-31803.94898,Cluster-31803.59911,Cluster-31803.46681,Cluster-31803.13827,Cluster-31803.45055,Cluster-31803.25438,Cluster-31803.102530,Cluster-31803.64167,Cluster-31803.51719,Cluster-31803.100458,Cluster-31803.107323
GO:0008982	protein-N(PI)-phosphohistidine-sugar phosphotransferase activity	molecular_function	1	2	Cluster-31803.68814,Cluster-31803.65414
GO:0009357	protein-N(PI)-phosphohistidine-sugar phosphotransferase complex	cellular_component	1	2	Cluster-31803.65414,Cluster-31803.68814
GO:0005785	signal recognition particle receptor complex	cellular_component	1	3	Cluster-31803.90956,Cluster-31803.75518,Cluster-31803.31653
GO:0006399	tRNA metabolic process	biological_process	1	32	Cluster-31803.29294,Cluster-31803.31080,Cluster-31803.91701,Cluster-31803.84659,Cluster-31803.41549,Cluster-31803.66090,Cluster-31803.56122,Cluster-31803.41446,Cluster-31803.29666,Cluster-31803.55044,Cluster-31803.52096,Cluster-31803.39022,Cluster-31803.35115,Cluster-31803.54524,Cluster-31803.41445,Cluster-31803.7700,Cluster-31803.86310,Cluster-31803.44422,Cluster-31803.30779,Cluster-31803.48726,…
GO:0042537	benzene-containing compound metabolic process	biological_process	1	7	Cluster-31803.96358,Cluster-31803.54712,Cluster-31803.72549,Cluster-31803.46305,Cluster-31803.54710,Cluster-31803.46795,Cluster-31803.52297
GO:0009273	peptidoglycan-based cell wall biogenesis	biological_process	1	3	Cluster-31803.101505,Cluster-31803.54211,Cluster-31803.69518
GO:0044550	secondary metabolite biosynthetic process	biological_process	1	4	Cluster-31803.15979,Cluster-31803.69518,Cluster-31803.70281,Cluster-31803.39801
GO:0006545	glycine biosynthetic process	biological_process	1	1	Cluster-31803.71782
GO:0009399	nitrogen fixation	biological_process	1	1	Cluster-31803.63296
GO:0005759	mitochondrial matrix	cellular_component	1	2	Cluster-31803.51447,Cluster-31803.42524
GO:0030288	outer membrane-bounded periplasmic space	cellular_component	1	1	Cluster-31803.87481
GO:0004408	holocytochrome-c synthase activity	molecular_function	1	1	Cluster-31803.33376
GO:0006643	membrane lipid metabolic process	biological_process	1	9	Cluster-31803.14138,Cluster-31803.77209,Cluster-31803.41549,Cluster-31803.95022,Cluster-31803.62016,Cluster-31803.36206,Cluster-31803.32535,Cluster-31803.35115,Cluster-31803.54317
GO:0006812	cation transport	biological_process	1	55	Cluster-31803.74400,Cluster-31803.33713,Cluster-31803.46795,Cluster-31803.74434,Cluster-31803.72549,Cluster-31803.62959,Cluster-31803.85955,Cluster-31803.16576,Cluster-31803.77209,Cluster-31803.55475,Cluster-31803.27706,Cluster-31803.54236,Cluster-31803.41140,Cluster-31803.70958,Cluster-31803.58015,Cluster-31803.45483,Cluster-31803.18763,Cluster-31803.57662,Cluster-31803.76092,Cluster-31803.59364…
GO:0009084	glutamine family amino acid biosynthetic process	biological_process	1	3	Cluster-31803.54211,Cluster-31803.67069,Cluster-31803.69518
GO:0031411	gas vesicle	cellular_component	1	1	Cluster-31803.6430
GO:0042819	vitamin B6 biosynthetic process	biological_process	1	2	Cluster-31803.45486,Cluster-31803.45484
GO:0004616	phosphogluconate dehydrogenase (decarboxylating) activity	molecular_function	1	4	Cluster-31803.54710,Cluster-31803.46795,Cluster-31803.52297,Cluster-31803.54712
GO:0019521	D-gluconate metabolic process	biological_process	1	4	Cluster-31803.46795,Cluster-31803.52297,Cluster-31803.54710,Cluster-31803.54712
GO:0044702	single organism reproductive process	biological_process	1	13	Cluster-31803.54211,Cluster-31803.84160,Cluster-31803.61564,Cluster-31803.44221,Cluster-31803.45632,Cluster-31803.49879,Cluster-31803.92817,Cluster-31803.54463,Cluster-31803.68598,Cluster-31803.83110,Cluster-31803.72458,Cluster-31803.46795,Cluster-31803.15545
GO:0006289	nucleotide-excision repair	biological_process	1	3	Cluster-31803.101354,Cluster-31803.23170,Cluster-31803.60636
GO:0008855	exodeoxyribonuclease VII activity	molecular_function	1	4	Cluster-31803.85230,Cluster-31803.22459,Cluster-31803.19238,Cluster-31803.68814
GO:0009318	exodeoxyribonuclease VII complex	cellular_component	1	4	Cluster-31803.85230,Cluster-31803.22459,Cluster-31803.19238,Cluster-31803.68814
GO:0004075	biotin carboxylase activity	molecular_function	1	1	Cluster-31803.72329
GO:0009343	biotin carboxylase complex	cellular_component	1	1	Cluster-31803.72329
GO:0015144	carbohydrate transmembrane transporter activity	molecular_function	1	4	Cluster-31803.36429,Cluster-31803.65414,Cluster-31803.92232,Cluster-31803.68814
GO:1901476	carbohydrate transporter activity	molecular_function	1	4	Cluster-31803.68814,Cluster-31803.92232,Cluster-31803.65414,Cluster-31803.36429
GO:0007034	vacuolar transport	biological_process	1	2	Cluster-31803.63296,Cluster-31803.30323
GO:0016032	viral process	biological_process	1	29	Cluster-31803.74993,Cluster-31803.44422,Cluster-31803.79185,Cluster-31803.63631,Cluster-31803.77576,Cluster-31803.69296,Cluster-31803.71701,Cluster-31803.62576,Cluster-31803.54117,Cluster-31803.86324,Cluster-31803.69335,Cluster-31803.6659,Cluster-31803.46675,Cluster-31803.58994,Cluster-31803.45498,Cluster-31803.35937,Cluster-31803.91237,Cluster-31803.101533,Cluster-31803.95113,Cluster-31803.36206…
GO:0007009	plasma membrane organization	biological_process	1	1	Cluster-31803.29294
GO:0005791	rough endoplasmic reticulum	cellular_component	1	3	Cluster-31803.75518,Cluster-31803.90956,Cluster-31803.31653
GO:0030867	rough endoplasmic reticulum membrane	cellular_component	1	3	Cluster-31803.31653,Cluster-31803.90956,Cluster-31803.75518
GO:0034755	iron ion transmembrane transport	biological_process	1	1	Cluster-31803.13295
GO:0090304	nucleic acid metabolic process	biological_process	1	202	Cluster-31803.79056,Cluster-31803.60636,Cluster-31803.9569,Cluster-31803.43576,Cluster-31803.91701,Cluster-31803.71617,Cluster-31803.84659,Cluster-31803.41549,Cluster-31803.38106,Cluster-31803.78451,Cluster-31803.66090,Cluster-31803.37899,Cluster-31803.36831,Cluster-31803.99504,Cluster-31803.56122,Cluster-31803.27182,Cluster-31803.67042,Cluster-31803.52096,Cluster-31803.54117,Cluster-31803.55044,…
GO:0019072	viral genome packaging	biological_process	1	1	Cluster-31803.41973
GO:0017048	Rho GTPase binding	molecular_function	1	1	Cluster-31803.91237
GO:0019520	aldonic acid metabolic process	biological_process	1	4	Cluster-31803.54712,Cluster-31803.52297,Cluster-31803.46795,Cluster-31803.54710
GO:0019882	antigen processing and presentation	biological_process	1	1	Cluster-31803.53393
GO:0005402	cation:sugar symporter activity	molecular_function	1	2	Cluster-31803.92232,Cluster-31803.36429
GO:0016787	hydrolase activity	molecular_function	1	197	Cluster-31803.74308,Cluster-31803.31416,Cluster-31803.61344,Cluster-31803.85230,Cluster-31803.62350,Cluster-31803.105483,Cluster-31803.54524,Cluster-31803.35115,Cluster-31803.13126,Cluster-31803.22459,Cluster-31803.55859,Cluster-31803.4794,Cluster-31803.108977,Cluster-31803.80840,Cluster-31803.77933,Cluster-31803.62748,Cluster-31803.19238,Cluster-31803.44058,Cluster-31803.101354,Cluster-31803.948…
GO:0009271	phage shock	biological_process	1	1	Cluster-31803.85230
GO:0098586	cellular response to virus	biological_process	1	1	Cluster-31803.85230
GO:0016977	chitosanase activity	molecular_function	1	1	Cluster-31803.94898
GO:0006948	induction by virus of host cell-cell fusion	biological_process	1	3	Cluster-31803.64563,Cluster-31803.43520,Cluster-31803.46675
GO:0001816	cytokine production	biological_process	1	1	Cluster-31803.43520
GO:0001817	regulation of cytokine production	biological_process	1	1	Cluster-31803.43520
GO:0001819	positive regulation of cytokine production	biological_process	1	1	Cluster-31803.43520
GO:0009231	riboflavin biosynthetic process	biological_process	1	2	Cluster-31803.55575,Cluster-31803.88544
GO:0042727	flavin-containing compound biosynthetic process	biological_process	1	2	Cluster-31803.88544,Cluster-31803.55575
GO:0005179	hormone activity	molecular_function	1	9	Cluster-31803.96355,Cluster-31803.43254,Cluster-31803.61564,Cluster-31803.67358,Cluster-31803.23353,Cluster-31803.60007,Cluster-31803.55243,Cluster-31803.28282,Cluster-31803.47741
GO:0071941	nitrogen cycle metabolic process	biological_process	1	3	Cluster-31803.98072,Cluster-31803.63151,Cluster-31803.63296
GO:0045595	regulation of cell differentiation	biological_process	1	1	Cluster-31803.92051
GO:0003682	chromatin binding	molecular_function	1	3	Cluster-31803.103557,Cluster-31803.85714,Cluster-31803.59364
GO:0008514	organic anion transmembrane transporter activity	molecular_function	1	4	Cluster-31803.42913,Cluster-31803.70958,Cluster-31803.70952,Cluster-31803.76092
GO:0051119	sugar transmembrane transporter activity	molecular_function	1	2	Cluster-31803.36429,Cluster-31803.92232
GO:0006096	glycolytic process	biological_process	1	6	Cluster-31803.40957,Cluster-31803.21942,Cluster-31803.59602,Cluster-31803.77576,Cluster-31803.57530,Cluster-31803.44058
GO:0006757	ATP generation from ADP	biological_process	1	6	Cluster-31803.44058,Cluster-31803.77576,Cluster-31803.57530,Cluster-31803.59602,Cluster-31803.21942,Cluster-31803.40957
GO:0009135	purine nucleoside diphosphate metabolic process	biological_process	1	6	Cluster-31803.59602,Cluster-31803.21942,Cluster-31803.44058,Cluster-31803.77576,Cluster-31803.57530,Cluster-31803.40957
GO:0009179	purine ribonucleoside diphosphate metabolic process	biological_process	1	6	Cluster-31803.59602,Cluster-31803.21942,Cluster-31803.44058,Cluster-31803.57530,Cluster-31803.77576,Cluster-31803.40957
GO:0009185	ribonucleoside diphosphate metabolic process	biological_process	1	6	Cluster-31803.40957,Cluster-31803.59602,Cluster-31803.21942,Cluster-31803.44058,Cluster-31803.77576,Cluster-31803.57530
GO:0046031	ADP metabolic process	biological_process	1	6	Cluster-31803.21942,Cluster-31803.59602,Cluster-31803.57530,Cluster-31803.77576,Cluster-31803.44058,Cluster-31803.40957
GO:0004478	methionine adenosyltransferase activity	molecular_function	1	1	Cluster-31803.99504
GO:0006556	S-adenosylmethionine biosynthetic process	biological_process	1	1	Cluster-31803.99504
GO:0051338	regulation of transferase activity	biological_process	1	4	Cluster-31803.106118,Cluster-31803.23353,Cluster-31803.52096,Cluster-31803.67069
GO:0006801	superoxide metabolic process	biological_process	1	2	Cluster-31803.55383,Cluster-31803.48726
GO:1903825	organic acid transmembrane transport	biological_process	1	4	Cluster-31803.70952,Cluster-31803.76092,Cluster-31803.70958,Cluster-31803.42913
GO:0009161	ribonucleoside monophosphate metabolic process	biological_process	1	23	Cluster-31803.62748,Cluster-31803.48966,Cluster-31803.25539,Cluster-31803.57530,Cluster-31803.38042,Cluster-31803.74400,Cluster-31803.44058,Cluster-31803.70958,Cluster-31803.55475,Cluster-31803.72674,Cluster-31803.77209,Cluster-31803.39821,Cluster-31803.47008,Cluster-31803.42219,Cluster-31803.107323,Cluster-31803.21942,Cluster-31803.77576,Cluster-31803.57662,Cluster-31803.76092,Cluster-31803.4789…
GO:1901031	regulation of response to reactive oxygen species	biological_process	1	1	Cluster-31803.68814
GO:1902882	regulation of response to oxidative stress	biological_process	1	1	Cluster-31803.68814
GO:0004553	hydrolase activity, hydrolyzing O-glycosyl compounds	molecular_function	1	18	Cluster-31803.94898,Cluster-31803.54317,Cluster-31803.20998,Cluster-31803.84316,Cluster-31803.31213,Cluster-31803.44221,Cluster-31803.26197,Cluster-31803.103557,Cluster-31803.105554,Cluster-31803.63940,Cluster-31803.42340,Cluster-31803.62016,Cluster-31803.62350,Cluster-31803.31214,Cluster-31803.62104,Cluster-31803.40725,Cluster-31803.46994,Cluster-31803.28030
GO:0048583	regulation of response to stimulus	biological_process	1	11	Cluster-31803.15545,Cluster-31803.54463,Cluster-31803.81410,Cluster-31803.45055,Cluster-31803.68814,Cluster-31803.38204,Cluster-31803.27182,Cluster-31803.41140,Cluster-31803.52988,Cluster-31803.70281,Cluster-31803.71701
GO:0098656	anion transmembrane transport	biological_process	1	4	Cluster-31803.70958,Cluster-31803.42913,Cluster-31803.76092,Cluster-31803.70952
GO:0006644	phospholipid metabolic process	biological_process	1	11	Cluster-31803.64574,Cluster-31803.77209,Cluster-31803.105902,Cluster-31803.65440,Cluster-31803.14138,Cluster-31803.95022,Cluster-31803.41549,Cluster-31803.100697,Cluster-31803.35115,Cluster-31803.36206,Cluster-31803.32535
GO:0009119	ribonucleoside metabolic process	biological_process	1	28	Cluster-31803.38204,Cluster-31803.102530,Cluster-31803.59602,Cluster-31803.37116,Cluster-31803.47890,Cluster-31803.39022,Cluster-31803.40957,Cluster-31803.77576,Cluster-31803.57662,Cluster-31803.76092,Cluster-31803.21942,Cluster-31803.51240,Cluster-31803.107323,Cluster-31803.42219,Cluster-31803.47008,Cluster-31803.39821,Cluster-31803.55475,Cluster-31803.77209,Cluster-31803.72674,Cluster-31803.709…
GO:0005977	glycogen metabolic process	biological_process	1	1	Cluster-31803.74549
GO:0005978	glycogen biosynthetic process	biological_process	1	1	Cluster-31803.74549
GO:0043565	sequence-specific DNA binding	molecular_function	1	15	Cluster-31803.31653,Cluster-31803.95433,Cluster-31803.31213,Cluster-31803.55406,Cluster-31803.55874,Cluster-31803.9569,Cluster-31803.51447,Cluster-31803.47177,Cluster-31803.45484,Cluster-31803.31214,Cluster-31803.29590,Cluster-31803.45854,Cluster-31803.26272,Cluster-31803.6639,Cluster-31803.81673
GO:0019856	pyrimidine nucleobase biosynthetic process	biological_process	1	1	Cluster-31803.73246
GO:0061630	ubiquitin protein ligase activity	molecular_function	1	4	Cluster-31803.63296,Cluster-31803.74945,Cluster-31803.65426,Cluster-31803.39379
GO:0061659	ubiquitin-like protein ligase activity	molecular_function	1	4	Cluster-31803.74945,Cluster-31803.39379,Cluster-31803.65426,Cluster-31803.63296
GO:0008135	translation factor activity, RNA binding	molecular_function	1	9	Cluster-31803.62016,Cluster-31803.53273,Cluster-31803.40334,Cluster-31803.42340,Cluster-31803.54317,Cluster-31803.58375,Cluster-31803.45483,Cluster-31803.21566,Cluster-31803.18957
GO:0008643	carbohydrate transport	biological_process	1	6	Cluster-31803.86324,Cluster-31803.68814,Cluster-31803.92232,Cluster-31803.65414,Cluster-31803.36429,Cluster-31803.72549
GO:0032040	small-subunit processome	cellular_component	1	5	Cluster-31803.42129,Cluster-31803.52926,Cluster-31803.43812,Cluster-31803.43813,Cluster-31803.100020
GO:0006457	protein folding	biological_process	1	12	Cluster-31803.58685,Cluster-31803.82761,Cluster-31803.54238,Cluster-31803.49084,Cluster-31803.39015,Cluster-31803.57544,Cluster-31803.31635,Cluster-31803.71874,Cluster-31803.94002,Cluster-31803.13295,Cluster-31803.54240,Cluster-31803.101311
GO:0006026	aminoglycan catabolic process	biological_process	1	2	Cluster-31803.54317,Cluster-31803.62016
GO:0004668	protein-arginine deiminase activity	molecular_function	1	1	Cluster-31803.42340
GO:0006163	purine nucleotide metabolic process	biological_process	1	25	Cluster-31803.39821,Cluster-31803.70958,Cluster-31803.77209,Cluster-31803.72674,Cluster-31803.81751,Cluster-31803.55475,Cluster-31803.25539,Cluster-31803.44058,Cluster-31803.57530,Cluster-31803.38042,Cluster-31803.74400,Cluster-31803.62748,Cluster-31803.48966,Cluster-31803.48689,Cluster-31803.59602,Cluster-31803.40957,Cluster-31803.47890,Cluster-31803.37116,Cluster-31803.21942,Cluster-31803.57662…
GO:0004529	exodeoxyribonuclease activity	molecular_function	1	4	Cluster-31803.85230,Cluster-31803.22459,Cluster-31803.19238,Cluster-31803.68814
GO:0016895	exodeoxyribonuclease activity, producing 5'-phosphomonoesters	molecular_function	1	4	Cluster-31803.19238,Cluster-31803.22459,Cluster-31803.68814,Cluster-31803.85230
GO:0018130	heterocycle biosynthetic process	biological_process	1	150	Cluster-31803.6639,Cluster-31803.38042,Cluster-31803.25539,Cluster-31803.55874,Cluster-31803.59478,Cluster-31803.100020,Cluster-31803.44422,Cluster-31803.58128,Cluster-31803.101311,Cluster-31803.62576,Cluster-31803.69296,Cluster-31803.90853,Cluster-31803.40352,Cluster-31803.55406,Cluster-31803.42524,Cluster-31803.48689,Cluster-31803.46681,Cluster-31803.62959,Cluster-31803.33578,Cluster-31803.7178…
GO:0006366	transcription from RNA polymerase II promoter	biological_process	1	38	Cluster-31803.46681,Cluster-31803.64597,Cluster-31803.62959,Cluster-31803.46767,Cluster-31803.57530,Cluster-31803.15518,Cluster-31803.36206,Cluster-31803.45483,Cluster-31803.74871,Cluster-31803.85955,Cluster-31803.97871,Cluster-31803.81410,Cluster-31803.86873,Cluster-31803.69518,Cluster-31803.64612,Cluster-31803.15368,Cluster-31803.46340,Cluster-31803.64605,Cluster-31803.51719,Cluster-31803.61564…
GO:0005215	transporter activity	molecular_function	1	80	Cluster-31803.93098,Cluster-31803.72674,Cluster-31803.25826,Cluster-31803.61888,Cluster-31803.44058,Cluster-31803.55037,Cluster-31803.62748,Cluster-31803.54463,Cluster-31803.36429,Cluster-31803.49879,Cluster-31803.67849,Cluster-31803.40772,Cluster-31803.47890,Cluster-31803.25822,Cluster-31803.92931,Cluster-31803.69005,Cluster-31803.105483,Cluster-31803.48009,Cluster-31803.42913,Cluster-31803.2923…
GO:0019238	cyclohydrolase activity	molecular_function	1	2	Cluster-31803.88544,Cluster-31803.80840
GO:0003723	RNA binding	molecular_function	1	51	Cluster-31803.21566,Cluster-31803.15455,Cluster-31803.67031,Cluster-31803.79266,Cluster-31803.76092,Cluster-31803.23183,Cluster-31803.37409,Cluster-31803.62016,Cluster-31803.40334,Cluster-31803.53854,Cluster-31803.5273,Cluster-31803.65639,Cluster-31803.108875,Cluster-31803.26254,Cluster-31803.70952,Cluster-31803.30779,Cluster-31803.55475,Cluster-31803.43520,Cluster-31803.45483,Cluster-31803.54317…
GO:0044424	intracellular part	cellular_component	1	266	Cluster-31803.54238,Cluster-31803.23170,Cluster-31803.31635,Cluster-31803.91704,Cluster-31803.76844,Cluster-31803.32685,Cluster-31803.47008,Cluster-31803.22126,Cluster-31803.71379,Cluster-31803.29590,Cluster-31803.61564,Cluster-31803.39118,Cluster-31803.25438,Cluster-31803.21566,Cluster-31803.51122,Cluster-31803.74247,Cluster-31803.91357,Cluster-31803.51719,Cluster-31803.36429,Cluster-31803.96355…
GO:1901566	organonitrogen compound biosynthetic process	biological_process	1	86	Cluster-31803.82464,Cluster-31803.93525,Cluster-31803.51122,Cluster-31803.71701,Cluster-31803.37116,Cluster-31803.15455,Cluster-31803.21566,Cluster-31803.102530,Cluster-31803.40334,Cluster-31803.47008,Cluster-31803.74993,Cluster-31803.29590,Cluster-31803.107323,Cluster-31803.95747,Cluster-31803.76092,Cluster-31803.41140,Cluster-31803.60760,Cluster-31803.81751,Cluster-31803.30091,Cluster-31803.555…
GO:0072525	pyridine-containing compound biosynthetic process	biological_process	1	3	Cluster-31803.45486,Cluster-31803.71481,Cluster-31803.45484
GO:0017076	purine nucleotide binding	molecular_function	1	134	Cluster-31803.108237,Cluster-31803.47594,Cluster-31803.6639,Cluster-31803.35072,Cluster-31803.71264,Cluster-31803.38042,Cluster-31803.72329,Cluster-31803.64167,Cluster-31803.69296,Cluster-31803.14245,Cluster-31803.90372,Cluster-31803.49765,Cluster-31803.19074,Cluster-31803.101505,Cluster-31803.46994,Cluster-31803.66661,Cluster-31803.44422,Cluster-31803.77209,Cluster-31803.84665,Cluster-31803.7187…
GO:0009152	purine ribonucleotide biosynthetic process	biological_process	1	9	Cluster-31803.47008,Cluster-31803.107323,Cluster-31803.25539,Cluster-31803.76092,Cluster-31803.38042,Cluster-31803.47890,Cluster-31803.70958,Cluster-31803.37116,Cluster-31803.48689
GO:0051240	positive regulation of multicellular organismal process	biological_process	1	2	Cluster-31803.41951,Cluster-31803.43520
GO:0044242	cellular lipid catabolic process	biological_process	1	3	Cluster-31803.76193,Cluster-31803.80077,Cluster-31803.63151
GO:0006858	extracellular transport	biological_process	1	1	Cluster-31803.47890
GO:0051028	mRNA transport	biological_process	1	3	Cluster-31803.93098,Cluster-31803.48798,Cluster-31803.45214
GO:0001883	purine nucleoside binding	molecular_function	1	133	Cluster-31803.76770,Cluster-31803.59602,Cluster-31803.79832,Cluster-31803.64155,Cluster-31803.75518,Cluster-31803.90956,Cluster-31803.81384,Cluster-31803.39821,Cluster-31803.41973,Cluster-31803.65630,Cluster-31803.68257,Cluster-31803.51447,Cluster-31803.55854,Cluster-31803.101418,Cluster-31803.53354,Cluster-31803.51045,Cluster-31803.55475,Cluster-31803.70202,Cluster-31803.97871,Cluster-31803.4095…
GO:0032550	purine ribonucleoside binding	molecular_function	1	133	Cluster-31803.39379,Cluster-31803.58700,Cluster-31803.28776,Cluster-31803.71874,Cluster-31803.87059,Cluster-31803.84665,Cluster-31803.77209,Cluster-31803.65725,Cluster-31803.24020,Cluster-31803.87789,Cluster-31803.26007,Cluster-31803.95022,Cluster-31803.46675,Cluster-31803.79266,Cluster-31803.10715,Cluster-31803.40265,Cluster-31803.71264,Cluster-31803.35072,Cluster-31803.38042,Cluster-31803.72329…
GO:0032555	purine ribonucleotide binding	molecular_function	1	133	Cluster-31803.55854,Cluster-31803.51447,Cluster-31803.51045,Cluster-31803.53354,Cluster-31803.101418,Cluster-31803.97871,Cluster-31803.70202,Cluster-31803.55475,Cluster-31803.59602,Cluster-31803.76770,Cluster-31803.79832,Cluster-31803.41973,Cluster-31803.39821,Cluster-31803.81384,Cluster-31803.90956,Cluster-31803.75518,Cluster-31803.64155,Cluster-31803.68257,Cluster-31803.65630,Cluster-31803.5649…
GO:0010340	carboxyl-O-methyltransferase activity	molecular_function	1	4	Cluster-31803.38204,Cluster-31803.51240,Cluster-31803.39022,Cluster-31803.18502
GO:0051998	protein carboxyl O-methyltransferase activity	molecular_function	1	4	Cluster-31803.51240,Cluster-31803.39022,Cluster-31803.18502,Cluster-31803.38204
GO:0000051	obsolete urea cycle intermediate metabolic process	biological_process	1	1	Cluster-31803.64155
GO:0007281	germ cell development	biological_process	1	8	Cluster-31803.83110,Cluster-31803.68598,Cluster-31803.15545,Cluster-31803.46795,Cluster-31803.54463,Cluster-31803.45632,Cluster-31803.92817,Cluster-31803.54211
GO:0042546	cell wall biogenesis	biological_process	1	4	Cluster-31803.39118,Cluster-31803.101505,Cluster-31803.54211,Cluster-31803.69518
GO:0006935	chemotaxis	biological_process	1	4	Cluster-31803.91716,Cluster-31803.30323,Cluster-31803.13827,Cluster-31803.105582
GO:0044036	cell wall macromolecule metabolic process	biological_process	1	3	Cluster-31803.69518,Cluster-31803.54211,Cluster-31803.101505
GO:0044724	single-organism carbohydrate catabolic process	biological_process	1	6	Cluster-31803.77576,Cluster-31803.57530,Cluster-31803.44058,Cluster-31803.21942,Cluster-31803.59602,Cluster-31803.40957
GO:0030313	cell envelope	cellular_component	1	2	Cluster-31803.87481,Cluster-31803.63151
GO:0006231	dTMP biosynthetic process	biological_process	1	1	Cluster-31803.71782
GO:0042083	5,10-methylenetetrahydrofolate-dependent methyltransferase activity	molecular_function	1	1	Cluster-31803.71782
GO:0046073	dTMP metabolic process	biological_process	1	1	Cluster-31803.71782
GO:0006112	energy reserve metabolic process	biological_process	1	1	Cluster-31803.74549
GO:0010558	negative regulation of macromolecule biosynthetic process	biological_process	1	3	Cluster-31803.101311,Cluster-31803.90853,Cluster-31803.94002
GO:0031327	negative regulation of cellular biosynthetic process	biological_process	1	3	Cluster-31803.90853,Cluster-31803.94002,Cluster-31803.101311
GO:0051172	negative regulation of nitrogen compound metabolic process	biological_process	1	3	Cluster-31803.101311,Cluster-31803.90853,Cluster-31803.94002
GO:2000113	negative regulation of cellular macromolecule biosynthetic process	biological_process	1	3	Cluster-31803.101311,Cluster-31803.90853,Cluster-31803.94002
GO:0009067	aspartate family amino acid biosynthetic process	biological_process	1	4	Cluster-31803.25822,Cluster-31803.25826,Cluster-31803.76193,Cluster-31803.28776
GO:0042816	vitamin B6 metabolic process	biological_process	1	2	Cluster-31803.45484,Cluster-31803.45486
GO:0003725	double-stranded RNA binding	molecular_function	1	1	Cluster-31803.58235
GO:0042274	ribosomal small subunit biogenesis	biological_process	1	1	Cluster-31803.86324
GO:0001664	G-protein coupled receptor binding	molecular_function	1	2	Cluster-31803.96355,Cluster-31803.47741
GO:0006811	ion transport	biological_process	1	71	Cluster-31803.55475,Cluster-31803.77209,Cluster-31803.70958,Cluster-31803.45483,Cluster-11919.1,Cluster-31803.70952,Cluster-31803.58329,Cluster-31803.62959,Cluster-31803.72549,Cluster-31803.74400,Cluster-31803.33713,Cluster-31803.29543,Cluster-31803.23780,Cluster-31803.35624,Cluster-31803.13295,Cluster-31803.54240,Cluster-31803.100697,Cluster-31803.101418,Cluster-31803.65639,Cluster-31803.57662,C…
GO:0042330	taxis	biological_process	1	4	Cluster-31803.91716,Cluster-31803.30323,Cluster-31803.105582,Cluster-31803.13827
GO:0000097	sulfur amino acid biosynthetic process	biological_process	1	2	Cluster-31803.38855,Cluster-31803.69742
GO:0019748	secondary metabolic process	biological_process	1	4	Cluster-31803.39801,Cluster-31803.15979,Cluster-31803.69518,Cluster-31803.70281
GO:0019438	aromatic compound biosynthetic process	biological_process	1	146	Cluster-31803.65936,Cluster-31803.77933,Cluster-31803.61089,Cluster-31803.80840,Cluster-31803.94898,Cluster-31803.25826,Cluster-31803.60827,Cluster-31803.44374,Cluster-31803.93098,Cluster-31803.36923,Cluster-31803.85230,Cluster-31803.24959,Cluster-31803.61344,Cluster-31803.54524,Cluster-31803.25822,Cluster-31803.47890,Cluster-31803.4794,Cluster-31803.55859,Cluster-31803.69982,Cluster-31803.67069,…
GO:0009890	negative regulation of biosynthetic process	biological_process	1	3	Cluster-31803.94002,Cluster-31803.90853,Cluster-31803.101311
GO:0009967	positive regulation of signal transduction	biological_process	1	3	Cluster-31803.38204,Cluster-31803.15545,Cluster-31803.81410
GO:0010647	positive regulation of cell communication	biological_process	1	3	Cluster-31803.81410,Cluster-31803.38204,Cluster-31803.15545
GO:0023056	positive regulation of signaling	biological_process	1	3	Cluster-31803.81410,Cluster-31803.38204,Cluster-31803.15545
GO:0006897	endocytosis	biological_process	1	2	Cluster-31803.56684,Cluster-31803.49084
GO:0022414	reproductive process	biological_process	1	14	Cluster-31803.72458,Cluster-31803.68598,Cluster-31803.83110,Cluster-31803.46795,Cluster-31803.15545,Cluster-31803.54463,Cluster-31803.62748,Cluster-31803.61564,Cluster-31803.44221,Cluster-31803.49879,Cluster-31803.45632,Cluster-31803.92817,Cluster-31803.54211,Cluster-31803.84160
GO:0048468	cell development	biological_process	1	9	Cluster-31803.68598,Cluster-31803.83110,Cluster-31803.15545,Cluster-31803.46795,Cluster-31803.54463,Cluster-31803.45632,Cluster-31803.92817,Cluster-31803.54211,Cluster-31803.91716
GO:0015925	galactosidase activity	molecular_function	1	2	Cluster-31803.54317,Cluster-31803.62016
GO:0048500	signal recognition particle	cellular_component	1	4	Cluster-31803.75518,Cluster-31803.90956,Cluster-31803.31653,Cluster-31803.26254
GO:0016874	ligase activity	molecular_function	1	20	Cluster-31803.75298,Cluster-31803.72329,Cluster-31803.28776,Cluster-31803.38042,Cluster-31803.81751,Cluster-31803.54211,Cluster-31803.84659,Cluster-31803.41549,Cluster-31803.29294,Cluster-31803.29590,Cluster-31803.91464,Cluster-31803.69518,Cluster-31803.86310,Cluster-31803.35115,Cluster-31803.63296,Cluster-31803.51122,Cluster-31803.40957,Cluster-31803.51447,Cluster-31803.101505,Cluster-31803.59602
GO:0009888	tissue development	biological_process	1	10	Cluster-31803.54211,Cluster-31803.92817,Cluster-31803.45632,Cluster-31803.54463,Cluster-31803.45498,Cluster-31803.15545,Cluster-31803.46795,Cluster-31803.83110,Cluster-31803.68598,Cluster-31803.41951
GO:0009156	ribonucleoside monophosphate biosynthetic process	biological_process	1	8	Cluster-31803.25539,Cluster-31803.38042,Cluster-31803.76092,Cluster-31803.47008,Cluster-31803.107323,Cluster-31803.48689,Cluster-31803.47890,Cluster-31803.70958
GO:0016778	diphosphotransferase activity	molecular_function	1	1	Cluster-31803.102530
GO:0006778	porphyrin-containing compound metabolic process	biological_process	1	11	Cluster-31803.4794,Cluster-31803.70958,Cluster-31803.33376,Cluster-31803.6659,Cluster-31803.45498,Cluster-31803.24959,Cluster-31803.98485,Cluster-31803.38855,Cluster-31803.15518,Cluster-31803.76092,Cluster-31803.77576
GO:0005622	intracellular	cellular_component	1	272	Cluster-31803.22459,Cluster-31803.54524,Cluster-31803.59464,Cluster-31803.35115,Cluster-31803.80077,Cluster-31803.69982,Cluster-31803.44454,Cluster-31803.99429,Cluster-31803.52926,Cluster-31803.47890,Cluster-31803.25822,Cluster-31803.19238,Cluster-31803.44058,Cluster-31803.94898,Cluster-31803.63418,Cluster-31803.55037,Cluster-31803.80840,Cluster-31803.62748,Cluster-31803.61089,Cluster-31803.60827…
GO:1902589	single-organism organelle organization	biological_process	1	21	Cluster-31803.62576,Cluster-31803.71701,Cluster-31803.27182,Cluster-31803.25822,Cluster-31803.52096,Cluster-31803.78456,Cluster-31803.56684,Cluster-31803.74308,Cluster-31803.46305,Cluster-31803.23353,Cluster-31803.45694,Cluster-31803.25826,Cluster-31803.41140,Cluster-31803.70281,Cluster-31803.74462,Cluster-31803.49084,Cluster-31803.73411,Cluster-31803.78451,Cluster-31803.91237,Cluster-31803.44038…
GO:0098542	defense response to other organism	biological_process	1	10	Cluster-31803.46994,Cluster-31803.71701,Cluster-31803.66724,Cluster-31803.47890,Cluster-31803.27182,Cluster-31803.41140,Cluster-31803.47741,Cluster-31803.86310,Cluster-31803.69742,Cluster-31803.91237
GO:0008374	O-acyltransferase activity	molecular_function	1	3	Cluster-31803.69742,Cluster-31803.9888,Cluster-31803.38855
GO:0007276	gamete generation	biological_process	1	11	Cluster-31803.46795,Cluster-31803.15545,Cluster-31803.83110,Cluster-31803.68598,Cluster-31803.54463,Cluster-31803.92817,Cluster-31803.61564,Cluster-31803.49879,Cluster-31803.45632,Cluster-31803.84160,Cluster-31803.54211
GO:0008171	O-methyltransferase activity	molecular_function	1	5	Cluster-31803.38204,Cluster-31803.58700,Cluster-31803.51240,Cluster-31803.39022,Cluster-31803.18502
GO:0009112	nucleobase metabolic process	biological_process	1	23	Cluster-31803.48726,Cluster-31803.81751,Cluster-31803.64155,Cluster-31803.46305,Cluster-31803.36923,Cluster-31803.93098,Cluster-31803.13827,Cluster-31803.46681,Cluster-31803.59911,Cluster-31803.94898,Cluster-31803.38042,Cluster-31803.46767,Cluster-31803.71782,Cluster-31803.71264,Cluster-31803.25539,Cluster-31803.51719,Cluster-31803.64167,Cluster-31803.102530,Cluster-31803.25438,Cluster-31803.4505…
GO:0016838	carbon-oxygen lyase activity, acting on phosphates	molecular_function	1	1	Cluster-31803.82070
GO:0015078	hydrogen ion transmembrane transporter activity	molecular_function	1	15	Cluster-31803.39821,Cluster-31803.68814,Cluster-31803.16576,Cluster-31803.70958,Cluster-31803.47890,Cluster-31803.23780,Cluster-31803.77209,Cluster-31803.72674,Cluster-31803.69005,Cluster-31803.57662,Cluster-31803.44058,Cluster-31803.76092,Cluster-31803.62748,Cluster-31803.74434,Cluster-31803.42219
GO:0006996	organelle organization	biological_process	1	52	Cluster-31803.75445,Cluster-31803.25826,Cluster-31803.65426,Cluster-31803.23353,Cluster-31803.93098,Cluster-31803.60827,Cluster-31803.80840,Cluster-31803.98965,Cluster-31803.78451,Cluster-31803.74462,Cluster-31803.65630,Cluster-31803.36831,Cluster-31803.38656,Cluster-31803.73411,Cluster-31803.99504,Cluster-31803.83172,Cluster-31803.27182,Cluster-31803.76770,Cluster-31803.52096,Cluster-31803.25822…
GO:0009279	cell outer membrane	cellular_component	1	1	Cluster-31803.63151
GO:0007591	molting cycle, chitin-based cuticle	biological_process	1	1	Cluster-31803.43254
GO:0008255	ecdysis-triggering hormone activity	molecular_function	1	1	Cluster-31803.43254
GO:0018990	ecdysis, chitin-based cuticle	biological_process	1	1	Cluster-31803.43254
GO:0022404	molting cycle process	biological_process	1	1	Cluster-31803.43254
GO:0042303	molting cycle	biological_process	1	1	Cluster-31803.43254
GO:0019229	regulation of vasoconstriction	biological_process	1	1	Cluster-31803.29294
GO:0042310	vasoconstriction	biological_process	1	1	Cluster-31803.29294
GO:0005815	microtubule organizing center	cellular_component	1	3	Cluster-31803.41140,Cluster-31803.62576,Cluster-31803.71701
GO:0034505	tooth mineralization	biological_process	1	1	Cluster-31803.41951
GO:0042481	regulation of odontogenesis	biological_process	1	1	Cluster-31803.41951
GO:0042482	positive regulation of odontogenesis	biological_process	1	1	Cluster-31803.41951
GO:0042487	regulation of odontogenesis of dentin-containing tooth	biological_process	1	1	Cluster-31803.41951
GO:0042488	positive regulation of odontogenesis of dentin-containing tooth	biological_process	1	1	Cluster-31803.41951
GO:0070166	enamel mineralization	biological_process	1	1	Cluster-31803.41951
GO:0070169	positive regulation of biomineral tissue development	biological_process	1	1	Cluster-31803.41951
GO:0070170	regulation of tooth mineralization	biological_process	1	1	Cluster-31803.41951
GO:0070172	positive regulation of tooth mineralization	biological_process	1	1	Cluster-31803.41951
GO:0070173	regulation of enamel mineralization	biological_process	1	1	Cluster-31803.41951
GO:0070175	positive regulation of enamel mineralization	biological_process	1	1	Cluster-31803.41951
GO:0097186	amelogenesis	biological_process	1	1	Cluster-31803.41951
GO:2000027	regulation of organ morphogenesis	biological_process	1	1	Cluster-31803.41951
GO:0009165	nucleotide biosynthetic process	biological_process	1	13	Cluster-31803.47890,Cluster-31803.70958,Cluster-31803.81751,Cluster-31803.37116,Cluster-31803.48689,Cluster-31803.102530,Cluster-31803.47008,Cluster-31803.107323,Cluster-31803.25539,Cluster-31803.71782,Cluster-31803.71481,Cluster-31803.38042,Cluster-31803.76092
GO:0006779	porphyrin-containing compound biosynthetic process	biological_process	1	8	Cluster-31803.70958,Cluster-31803.4794,Cluster-31803.45498,Cluster-31803.24959,Cluster-31803.38855,Cluster-31803.98485,Cluster-31803.76092,Cluster-31803.77576
GO:0019643	reductive tricarboxylic acid cycle	biological_process	1	3	Cluster-31803.59602,Cluster-31803.46994,Cluster-31803.40957
GO:0043228	non-membrane-bounded organelle	cellular_component	1	86	Cluster-31803.26254,Cluster-31803.46305,Cluster-31803.41140,Cluster-31803.70281,Cluster-31803.30779,Cluster-31803.57916,Cluster-31803.46767,Cluster-31803.91237,Cluster-31803.23170,Cluster-31803.13827,Cluster-31803.38204,Cluster-31803.21566,Cluster-31803.25438,Cluster-31803.82464,Cluster-31803.85714,Cluster-31803.51719,Cluster-31803.71701,Cluster-31803.32685,Cluster-31803.40334,Cluster-31803.74993…
GO:0043605	cellular amide catabolic process	biological_process	1	1	Cluster-31803.13827
GO:0034599	cellular response to oxidative stress	biological_process	1	1	Cluster-31803.48726
GO:0032549	ribonucleoside binding	molecular_function	1	133	Cluster-31803.65630,Cluster-31803.68257,Cluster-31803.41973,Cluster-31803.39821,Cluster-31803.81384,Cluster-31803.90956,Cluster-31803.64155,Cluster-31803.75518,Cluster-31803.79832,Cluster-31803.59602,Cluster-31803.76770,Cluster-31803.97871,Cluster-31803.70202,Cluster-31803.55475,Cluster-31803.51045,Cluster-31803.101418,Cluster-31803.53354,Cluster-31803.55854,Cluster-31803.51447,Cluster-31803.4779…
GO:0005102	receptor binding	molecular_function	1	18	Cluster-31803.47741,Cluster-31803.41140,Cluster-31803.60007,Cluster-31803.29294,Cluster-31803.23353,Cluster-31803.67358,Cluster-31803.43254,Cluster-31803.91237,Cluster-31803.96355,Cluster-31803.57530,Cluster-31803.52096,Cluster-31803.28282,Cluster-31803.71701,Cluster-31803.55243,Cluster-31803.62104,Cluster-31803.61564,Cluster-31803.81410,Cluster-31803.45024
GO:0070011	peptidase activity, acting on L-amino acid peptides	molecular_function	1	55	Cluster-31803.65489,Cluster-31803.90956,Cluster-31803.43576,Cluster-31803.7833,Cluster-31803.31080,Cluster-31803.60007,Cluster-31803.68814,Cluster-31803.36429,Cluster-31803.45498,Cluster-31803.62748,Cluster-31803.72213,Cluster-31803.95113,Cluster-31803.82761,Cluster-31803.56122,Cluster-31803.50184,Cluster-31803.108977,Cluster-31803.95712,Cluster-31803.40352,Cluster-31803.88388,Cluster-31803.45055…
GO:0016709	oxidoreductase activity, acting on paired donors, with incorporation or reduction of molecular oxygen, NAD(P)H as one donor, and incorporation of one atom of oxygen	molecular_function	1	2	Cluster-31803.69335,Cluster-31803.66090
GO:1901293	nucleoside phosphate biosynthetic process	biological_process	1	13	Cluster-31803.81751,Cluster-31803.37116,Cluster-31803.47890,Cluster-31803.70958,Cluster-31803.102530,Cluster-31803.48689,Cluster-31803.107323,Cluster-31803.47008,Cluster-31803.76092,Cluster-31803.38042,Cluster-31803.71481,Cluster-31803.71782,Cluster-31803.25539
GO:0044432	endoplasmic reticulum part	cellular_component	1	12	Cluster-31803.58685,Cluster-31803.30686,Cluster-31803.44058,Cluster-31803.100697,Cluster-31803.55037,Cluster-31803.68814,Cluster-31803.31653,Cluster-31803.105902,Cluster-31803.76770,Cluster-31803.90956,Cluster-31803.77209,Cluster-31803.75518
GO:0051171	regulation of nitrogen compound metabolic process	biological_process	1	96	Cluster-31803.55874,Cluster-31803.103557,Cluster-31803.59478,Cluster-31803.32161,Cluster-31803.44221,Cluster-31803.39801,Cluster-31803.48754,Cluster-31803.42029,Cluster-31803.6639,Cluster-31803.32222,Cluster-31803.27077,Cluster-31803.38042,Cluster-31803.106118,Cluster-31803.73411,Cluster-31803.101311,Cluster-31803.52989,Cluster-31803.90853,Cluster-31803.55406,Cluster-31803.42524,Cluster-31803.444…
GO:0007224	smoothened signaling pathway	biological_process	1	2	Cluster-31803.23170,Cluster-31803.89812
GO:0006783	heme biosynthetic process	biological_process	1	6	Cluster-31803.77576,Cluster-31803.38855,Cluster-31803.98485,Cluster-31803.24959,Cluster-31803.4794,Cluster-31803.45498
GO:0006269	DNA replication, synthesis of RNA primer	biological_process	1	2	Cluster-31803.54693,Cluster-31803.75355
GO:0022857	transmembrane transporter activity	molecular_function	1	69	Cluster-31803.54240,Cluster-31803.35624,Cluster-31803.13295,Cluster-31803.23780,Cluster-31803.59364,Cluster-31803.57662,Cluster-31803.65639,Cluster-31803.70952,Cluster-31803.45483,Cluster-31803.70958,Cluster-31803.77209,Cluster-31803.33713,Cluster-31803.74400,Cluster-31803.62959,Cluster-31803.58329,Cluster-31803.69139,Cluster-31803.31171,Cluster-31803.14245,Cluster-31803.92232,Cluster-31803.62576…
GO:0050840	extracellular matrix binding	molecular_function	1	3	Cluster-31803.74871,Cluster-31803.54117,Cluster-31803.27706
GO:0016054	organic acid catabolic process	biological_process	1	11	Cluster-31803.72549,Cluster-31803.54712,Cluster-31803.21601,Cluster-31803.46795,Cluster-31803.76193,Cluster-31803.54710,Cluster-31803.63151,Cluster-31803.96358,Cluster-31803.52297,Cluster-31803.46305,Cluster-31803.80077
GO:0046395	carboxylic acid catabolic process	biological_process	1	11	Cluster-31803.72549,Cluster-31803.54712,Cluster-31803.21601,Cluster-31803.76193,Cluster-31803.46795,Cluster-31803.54710,Cluster-31803.63151,Cluster-31803.96358,Cluster-31803.52297,Cluster-31803.46305,Cluster-31803.80077
GO:0005488	binding	molecular_function	1	465	Cluster-31803.79266,Cluster-31803.29543,Cluster-31803.16955,Cluster-31803.45214,Cluster-31803.27949,Cluster-31803.75438,Cluster-31803.46675,Cluster-31803.33359,Cluster-31803.67031,Cluster-31803.65639,Cluster-31803.15368,Cluster-31803.57662,Cluster-31803.65725,Cluster-31803.62795,Cluster-31803.59210,Cluster-31803.77209,Cluster-31803.43520,Cluster-31803.45483,Cluster-31803.95433,Cluster-31803.84665…
GO:0005506	iron ion binding	molecular_function	1	10	Cluster-31803.46795,Cluster-31803.98072,Cluster-31803.83920,Cluster-31803.72549,Cluster-31803.42029,Cluster-31803.67675,Cluster-31803.61564,Cluster-31803.63895,Cluster-31803.55243,Cluster-31803.99429
GO:0004221	obsolete ubiquitin thiolesterase activity	molecular_function	1	1	Cluster-31803.90956
GO:0009150	purine ribonucleotide metabolic process	biological_process	1	24	Cluster-31803.59602,Cluster-31803.48689,Cluster-31803.37116,Cluster-31803.47890,Cluster-31803.40957,Cluster-31803.77576,Cluster-31803.76092,Cluster-31803.57662,Cluster-31803.21942,Cluster-31803.42219,Cluster-31803.107323,Cluster-31803.47008,Cluster-31803.39821,Cluster-31803.55475,Cluster-31803.72674,Cluster-31803.77209,Cluster-31803.70958,Cluster-31803.57530,Cluster-31803.74400,Cluster-31803.3804…
GO:0015985	energy coupled proton transport, down electrochemical gradient	biological_process	1	3	Cluster-31803.76092,Cluster-31803.47890,Cluster-31803.70958
GO:0015986	ATP synthesis coupled proton transport	biological_process	1	3	Cluster-31803.76092,Cluster-31803.70958,Cluster-31803.47890
GO:0005539	glycosaminoglycan binding	molecular_function	1	1	Cluster-31803.91237
GO:0009877	nodulation	biological_process	1	2	Cluster-31803.41446,Cluster-31803.39022
GO:0005882	intermediate filament	cellular_component	1	8	Cluster-31803.49084,Cluster-31803.59464,Cluster-31803.35115,Cluster-31803.9113,Cluster-31803.91237,Cluster-31803.46994,Cluster-31803.41549,Cluster-31803.52096
GO:0045111	intermediate filament cytoskeleton	cellular_component	1	8	Cluster-31803.52096,Cluster-31803.41549,Cluster-31803.46994,Cluster-31803.91237,Cluster-31803.9113,Cluster-31803.35115,Cluster-31803.59464,Cluster-31803.49084
GO:0003013	circulatory system process	biological_process	1	1	Cluster-31803.29294
GO:0003018	vascular process in circulatory system	biological_process	1	1	Cluster-31803.29294
GO:0008015	blood circulation	biological_process	1	1	Cluster-31803.29294
GO:0035150	regulation of tube size	biological_process	1	1	Cluster-31803.29294
GO:0044057	regulation of system process	biological_process	1	1	Cluster-31803.29294
GO:0050880	regulation of blood vessel size	biological_process	1	1	Cluster-31803.29294
GO:1903522	regulation of blood circulation	biological_process	1	1	Cluster-31803.29294
GO:0001514	selenocysteine incorporation	biological_process	1	1	Cluster-31803.53273
GO:0006451	translational readthrough	biological_process	1	1	Cluster-31803.53273
GO:0001882	nucleoside binding	molecular_function	1	133	Cluster-31803.75298,Cluster-31803.9845,Cluster-31803.57530,Cluster-31803.50590,Cluster-31803.15580,Cluster-31803.20011,Cluster-31803.70281,Cluster-31803.31653,Cluster-31803.40334,Cluster-31803.13763,Cluster-31803.44112,Cluster-31803.53879,Cluster-31803.37116,Cluster-31803.74328,Cluster-31803.15455,Cluster-31803.102817,Cluster-31803.58061,Cluster-31803.44058,Cluster-31803.75445,Cluster-31803.98649…
GO:0048609	multicellular organismal reproductive process	biological_process	1	11	Cluster-31803.46795,Cluster-31803.15545,Cluster-31803.83110,Cluster-31803.68598,Cluster-31803.54463,Cluster-31803.92817,Cluster-31803.61564,Cluster-31803.49879,Cluster-31803.45632,Cluster-31803.84160,Cluster-31803.54211
GO:0071554	cell wall organization or biogenesis	biological_process	1	5	Cluster-31803.69518,Cluster-31803.54211,Cluster-31803.51248,Cluster-31803.101505,Cluster-31803.39118
GO:0008146	sulfotransferase activity	molecular_function	1	4	Cluster-31803.84316,Cluster-31803.94166,Cluster-31803.108977,Cluster-31803.15935
GO:0044271	cellular nitrogen compound biosynthetic process	biological_process	1	176	Cluster-31803.6639,Cluster-31803.25539,Cluster-31803.83172,Cluster-31803.38042,Cluster-31803.59478,Cluster-31803.55874,Cluster-31803.100020,Cluster-31803.44422,Cluster-31803.58128,Cluster-31803.42340,Cluster-31803.69296,Cluster-31803.101311,Cluster-31803.62576,Cluster-31803.48689,Cluster-31803.40352,Cluster-31803.42524,Cluster-31803.55406,Cluster-31803.90853,Cluster-31803.62959,Cluster-31803.4668…
GO:0047134	protein-disulfide reductase activity	molecular_function	1	1	Cluster-31803.76193
GO:0005319	lipid transporter activity	molecular_function	1	1	Cluster-31803.92931
GO:1901362	organic cyclic compound biosynthetic process	biological_process	1	154	Cluster-31803.85230,Cluster-31803.24959,Cluster-31803.61344,Cluster-31803.54524,Cluster-31803.25822,Cluster-31803.47890,Cluster-31803.4794,Cluster-31803.55859,Cluster-31803.69982,Cluster-31803.65936,Cluster-31803.77933,Cluster-31803.61089,Cluster-31803.80840,Cluster-31803.94898,Cluster-31803.25826,Cluster-31803.44374,Cluster-31803.60827,Cluster-31803.93098,Cluster-31803.36923,Cluster-31803.25899,…
GO:0045893	positive regulation of transcription, DNA-templated	biological_process	1	4	Cluster-31803.25826,Cluster-31803.25822,Cluster-31803.44221,Cluster-31803.72458
GO:0045935	positive regulation of nucleobase-containing compound metabolic process	biological_process	1	4	Cluster-31803.25822,Cluster-31803.25826,Cluster-31803.72458,Cluster-31803.44221
GO:0051254	positive regulation of RNA metabolic process	biological_process	1	4	Cluster-31803.72458,Cluster-31803.44221,Cluster-31803.25826,Cluster-31803.25822
GO:1902680	positive regulation of RNA biosynthetic process	biological_process	1	4	Cluster-31803.72458,Cluster-31803.44221,Cluster-31803.25822,Cluster-31803.25826
GO:1903508	positive regulation of nucleic acid-templated transcription	biological_process	1	4	Cluster-31803.25822,Cluster-31803.25826,Cluster-31803.72458,Cluster-31803.44221
GO:0060429	epithelium development	biological_process	1	9	Cluster-31803.54463,Cluster-31803.45498,Cluster-31803.15545,Cluster-31803.46795,Cluster-31803.68598,Cluster-31803.83110,Cluster-31803.54211,Cluster-31803.92817,Cluster-31803.45632
GO:0008375	acetylglucosaminyltransferase activity	molecular_function	1	3	Cluster-31803.35937,Cluster-31803.72656,Cluster-31803.9120
GO:1901659	glycosyl compound biosynthetic process	biological_process	1	10	Cluster-31803.21942,Cluster-31803.99504,Cluster-31803.38042,Cluster-31803.76092,Cluster-31803.47008,Cluster-31803.107323,Cluster-31803.102530,Cluster-31803.47890,Cluster-31803.70958,Cluster-31803.37116
GO:0005737	cytoplasm	cellular_component	1	116	Cluster-31803.44058,Cluster-31803.63418,Cluster-31803.65936,Cluster-31803.96355,Cluster-31803.38855,Cluster-31803.55037,Cluster-31803.21983,Cluster-31803.36429,Cluster-31803.84659,Cluster-31803.41549,Cluster-31803.29294,Cluster-31803.91701,Cluster-31803.72674,Cluster-31803.104362,Cluster-31803.64563,Cluster-31803.79056,Cluster-31803.30959,Cluster-31803.82992,Cluster-31803.58685,Cluster-31803.7757…
GO:0004488	methylenetetrahydrofolate dehydrogenase (NADP+) activity	molecular_function	1	1	Cluster-31803.4794
GO:0004161	dimethylallyltranstransferase activity	molecular_function	1	2	Cluster-31803.30779,Cluster-31803.44422
GO:0006024	glycosaminoglycan biosynthetic process	biological_process	1	3	Cluster-31803.101505,Cluster-31803.69518,Cluster-31803.54211
GO:0007015	actin filament organization	biological_process	1	2	Cluster-31803.49084,Cluster-31803.56684
GO:0004594	pantothenate kinase activity	molecular_function	1	1	Cluster-31803.37116
GO:0033043	regulation of organelle organization	biological_process	1	6	Cluster-31803.15545,Cluster-31803.23353,Cluster-31803.38204,Cluster-31803.52096,Cluster-31803.25822,Cluster-31803.25826
GO:0030684	preribosome	cellular_component	1	5	Cluster-31803.43812,Cluster-31803.42129,Cluster-31803.52926,Cluster-31803.100020,Cluster-31803.43813
GO:0043900	regulation of multi-organism process	biological_process	1	2	Cluster-31803.15683,Cluster-31803.59911
GO:0005057	receptor signaling protein activity	molecular_function	1	5	Cluster-31803.23749,Cluster-31803.105582,Cluster-31803.13827,Cluster-31803.95642,Cluster-31803.15005
GO:0006544	glycine metabolic process	biological_process	1	4	Cluster-31803.84665,Cluster-31803.84659,Cluster-31803.71782,Cluster-31803.86747
GO:0004315	3-oxoacyl-[acyl-carrier-protein] synthase activity	molecular_function	1	1	Cluster-31803.21983
GO:0031418	L-ascorbic acid binding	molecular_function	1	1	Cluster-31803.63895
GO:0015977	carbon fixation	biological_process	1	3	Cluster-31803.40957,Cluster-31803.59602,Cluster-31803.46994
GO:0008452	RNA ligase activity	molecular_function	1	1	Cluster-31803.54211
GO:0003916	DNA topoisomerase activity	molecular_function	1	3	Cluster-31803.65426,Cluster-31803.38656,Cluster-31803.80840
GO:0043170	macromolecule metabolic process	biological_process	1	323	Cluster-31803.74871,Cluster-31803.53443,Cluster-31803.85955,Cluster-31803.46305,Cluster-31803.30779,Cluster-31803.5552,Cluster-31803.72458,Cluster-31803.46767,Cluster-31803.91237,Cluster-31803.64540,Cluster-31803.31069,Cluster-31803.64617,Cluster-31803.38204,Cluster-31803.66155,Cluster-31803.85714,Cluster-31803.71701,Cluster-31803.64612,Cluster-31803.81673,Cluster-31803.86873,Cluster-31803.107323…
GO:0043232	intracellular non-membrane-bounded organelle	cellular_component	1	84	Cluster-31803.94898,Cluster-31803.96355,Cluster-31803.65936,Cluster-31803.80840,Cluster-31803.38106,Cluster-31803.41549,Cluster-31803.44374,Cluster-31803.36923,Cluster-31803.93098,Cluster-31803.84160,Cluster-31803.60636,Cluster-31803.82992,Cluster-31803.59464,Cluster-31803.54524,Cluster-31803.58375,Cluster-31803.13126,Cluster-31803.35115,Cluster-31803.46435,Cluster-31803.53273,Cluster-31803.67849…
GO:0006633	fatty acid biosynthetic process	biological_process	1	8	Cluster-31803.52297,Cluster-31803.54710,Cluster-31803.72329,Cluster-31803.46795,Cluster-31803.42029,Cluster-31803.21983,Cluster-31803.54712,Cluster-31803.72549
GO:0044087	regulation of cellular component biogenesis	biological_process	1	2	Cluster-31803.25826,Cluster-31803.25822
GO:0003743	translation initiation factor activity	molecular_function	1	6	Cluster-31803.45483,Cluster-31803.62016,Cluster-31803.58375,Cluster-31803.54317,Cluster-31803.21566,Cluster-31803.18957
GO:0003746	translation elongation factor activity	molecular_function	1	2	Cluster-31803.53273,Cluster-31803.40334
GO:0019898	extrinsic component of membrane	cellular_component	1	7	Cluster-31803.63981,Cluster-31803.98613,Cluster-31803.29294,Cluster-31803.48726,Cluster-31803.91237,Cluster-31803.47741,Cluster-31803.51447
GO:0030173	integral component of Golgi membrane	cellular_component	1	2	Cluster-31803.104362,Cluster-31803.25822
GO:0031228	intrinsic component of Golgi membrane	cellular_component	1	2	Cluster-31803.25822,Cluster-31803.104362
GO:0030151	molybdenum ion binding	molecular_function	1	2	Cluster-31803.98072,Cluster-31803.63151
GO:0004853	uroporphyrinogen decarboxylase activity	molecular_function	1	1	Cluster-31803.24959
GO:0009896	positive regulation of catabolic process	biological_process	1	4	Cluster-31803.48754,Cluster-31803.32161,Cluster-31803.52989,Cluster-31803.91237
GO:0010508	positive regulation of autophagy	biological_process	1	4	Cluster-31803.48754,Cluster-31803.91237,Cluster-31803.32161,Cluster-31803.52989
GO:0031331	positive regulation of cellular catabolic process	biological_process	1	4	Cluster-31803.48754,Cluster-31803.91237,Cluster-31803.32161,Cluster-31803.52989
GO:0022891	substrate-specific transmembrane transporter activity	molecular_function	1	57	Cluster-31803.58329,Cluster-31803.74434,Cluster-31803.62959,Cluster-31803.33713,Cluster-31803.27706,Cluster-31803.105554,Cluster-31803.54236,Cluster-31803.77209,Cluster-31803.58015,Cluster-31803.70958,Cluster-31803.45483,Cluster-31803.41140,Cluster-31803.29237,Cluster-31803.85955,Cluster-31803.16576,Cluster-31803.70952,Cluster-31803.65639,Cluster-31803.76092,Cluster-31803.18763,Cluster-31803.5766…
GO:0008233	peptidase activity	molecular_function	1	59	Cluster-31803.74328,Cluster-31803.33376,Cluster-31803.23780,Cluster-31803.63151,Cluster-31803.45750,Cluster-31803.80182,Cluster-31803.55243,Cluster-31803.31069,Cluster-31803.56497,Cluster-31803.97450,Cluster-31803.61564,Cluster-31803.87481,Cluster-31803.86324,Cluster-31803.43580,Cluster-31803.101418,Cluster-31803.22126,Cluster-31803.100398,Cluster-31803.100458,Cluster-31803.15368,Cluster-31803.45…
GO:0016861	intramolecular oxidoreductase activity, interconverting aldoses and ketoses	molecular_function	1	2	Cluster-31803.93525,Cluster-31803.101533
GO:0051726	regulation of cell cycle	biological_process	1	6	Cluster-31803.106118,Cluster-31803.23353,Cluster-31803.52096,Cluster-31803.61089,Cluster-31803.74964,Cluster-31803.42009
GO:0003995	acyl-CoA dehydrogenase activity	molecular_function	1	2	Cluster-31803.80077,Cluster-31803.76193
GO:0006094	gluconeogenesis	biological_process	1	7	Cluster-31803.44058,Cluster-31803.57530,Cluster-31803.77576,Cluster-31803.59602,Cluster-31803.21942,Cluster-31803.40957,Cluster-31803.53354
GO:0009116	nucleoside metabolic process	biological_process	1	29	Cluster-31803.99504,Cluster-31803.38042,Cluster-31803.57530,Cluster-31803.74400,Cluster-31803.44058,Cluster-31803.62748,Cluster-31803.18502,Cluster-31803.97049,Cluster-31803.48966,Cluster-31803.39821,Cluster-31803.70958,Cluster-31803.55475,Cluster-31803.77209,Cluster-31803.72674,Cluster-31803.21942,Cluster-31803.77576,Cluster-31803.76092,Cluster-31803.57662,Cluster-31803.47008,Cluster-31803.51240…
GO:0035639	purine ribonucleoside triphosphate binding	molecular_function	1	131	Cluster-31803.68257,Cluster-31803.65630,Cluster-31803.81384,Cluster-31803.41973,Cluster-31803.39821,Cluster-31803.75518,Cluster-31803.64155,Cluster-31803.90956,Cluster-31803.79832,Cluster-31803.76770,Cluster-31803.97871,Cluster-31803.55475,Cluster-31803.70202,Cluster-31803.51045,Cluster-31803.53354,Cluster-31803.101418,Cluster-31803.55854,Cluster-31803.51447,Cluster-31803.102830,Cluster-31803.107…
GO:0006165	nucleoside diphosphate phosphorylation	biological_process	1	6	Cluster-31803.44058,Cluster-31803.57530,Cluster-31803.77576,Cluster-31803.59602,Cluster-31803.21942,Cluster-31803.40957
GO:0016310	phosphorylation	biological_process	1	61	Cluster-31803.24020,Cluster-31803.26007,Cluster-31803.95022,Cluster-31803.23749,Cluster-31803.66155,Cluster-31803.79266,Cluster-31803.10715,Cluster-31803.40265,Cluster-31803.65725,Cluster-31803.21942,Cluster-31803.57662,Cluster-31803.42103,Cluster-31803.100697,Cluster-31803.45694,Cluster-31803.97871,Cluster-31803.84665,Cluster-31803.46305,Cluster-31803.93526,Cluster-31803.55475,Cluster-31803.7720…
GO:0019319	hexose biosynthetic process	biological_process	1	7	Cluster-31803.59602,Cluster-31803.21942,Cluster-31803.44058,Cluster-31803.57530,Cluster-31803.77576,Cluster-31803.53354,Cluster-31803.40957
GO:0046364	monosaccharide biosynthetic process	biological_process	1	7	Cluster-31803.59602,Cluster-31803.21942,Cluster-31803.44058,Cluster-31803.57530,Cluster-31803.77576,Cluster-31803.53354,Cluster-31803.40957
GO:0044767	single-organism developmental process	biological_process	1	26	Cluster-31803.76844,Cluster-31803.68598,Cluster-31803.71701,Cluster-31803.62576,Cluster-31803.45632,Cluster-31803.62748,Cluster-31803.54463,Cluster-31803.25903,Cluster-31803.44038,Cluster-31803.91237,Cluster-31803.15545,Cluster-31803.46795,Cluster-31803.74462,Cluster-31803.36206,Cluster-31803.83110,Cluster-31803.72458,Cluster-31803.41951,Cluster-31803.70281,Cluster-31803.41140,Cluster-31803.91716…
GO:0044282	small molecule catabolic process	biological_process	1	11	Cluster-31803.63151,Cluster-31803.96358,Cluster-31803.52297,Cluster-31803.46305,Cluster-31803.80077,Cluster-31803.54712,Cluster-31803.72549,Cluster-31803.21601,Cluster-31803.76193,Cluster-31803.46795,Cluster-31803.54710
GO:0005753	mitochondrial proton-transporting ATP synthase complex	cellular_component	1	3	Cluster-31803.70958,Cluster-31803.47008,Cluster-31803.76092
GO:0009163	nucleoside biosynthetic process	biological_process	1	9	Cluster-31803.47890,Cluster-31803.70958,Cluster-31803.37116,Cluster-31803.102530,Cluster-31803.47008,Cluster-31803.107323,Cluster-31803.99504,Cluster-31803.38042,Cluster-31803.76092
GO:0042455	ribonucleoside biosynthetic process	biological_process	1	9	Cluster-31803.47008,Cluster-31803.107323,Cluster-31803.99504,Cluster-31803.38042,Cluster-31803.76092,Cluster-31803.47890,Cluster-31803.70958,Cluster-31803.37116,Cluster-31803.102530
GO:0006403	RNA localization	biological_process	1	3	Cluster-31803.48798,Cluster-31803.45214,Cluster-31803.93098
GO:0050657	nucleic acid transport	biological_process	1	3	Cluster-31803.48798,Cluster-31803.45214,Cluster-31803.93098
GO:0050658	RNA transport	biological_process	1	3	Cluster-31803.93098,Cluster-31803.48798,Cluster-31803.45214
GO:0051236	establishment of RNA localization	biological_process	1	3	Cluster-31803.93098,Cluster-31803.45214,Cluster-31803.48798
GO:0048522	positive regulation of cellular process	biological_process	1	12	Cluster-31803.91237,Cluster-31803.48754,Cluster-31803.81410,Cluster-31803.15545,Cluster-31803.72458,Cluster-31803.25822,Cluster-31803.32161,Cluster-31803.43520,Cluster-31803.52989,Cluster-31803.25826,Cluster-31803.44221,Cluster-31803.38204
GO:0048029	monosaccharide binding	molecular_function	1	1	Cluster-31803.63895
GO:0004857	enzyme inhibitor activity	molecular_function	1	8	Cluster-31803.21601,Cluster-31803.95113,Cluster-31803.20011,Cluster-31803.48726,Cluster-31803.55243,Cluster-31803.61564,Cluster-31803.30091,Cluster-31803.60007
GO:0015672	monovalent inorganic cation transport	biological_process	1	31	Cluster-31803.39821,Cluster-31803.16576,Cluster-31803.68814,Cluster-31803.41140,Cluster-31803.70958,Cluster-31803.72674,Cluster-31803.25826,Cluster-31803.77209,Cluster-31803.27706,Cluster-31803.55475,Cluster-31803.46795,Cluster-31803.58906,Cluster-31803.74400,Cluster-31803.62748,Cluster-31803.55037,Cluster-31803.90853,Cluster-31803.35624,Cluster-31803.49879,Cluster-31803.25822,Cluster-31803.47890…
GO:0032502	developmental process	biological_process	1	28	Cluster-31803.71701,Cluster-31803.62576,Cluster-31803.45632,Cluster-31803.68598,Cluster-31803.76844,Cluster-31803.92051,Cluster-31803.54211,Cluster-31803.70281,Cluster-31803.91716,Cluster-31803.41140,Cluster-31803.46305,Cluster-31803.44221,Cluster-31803.92817,Cluster-31803.45694,Cluster-31803.54463,Cluster-31803.62748,Cluster-31803.45498,Cluster-31803.91237,Cluster-31803.25903,Cluster-31803.44038…
GO:0044711	single-organism biosynthetic process	biological_process	1	82	Cluster-31803.66143,Cluster-31803.45214,Cluster-31803.71481,Cluster-31803.88544,Cluster-31803.69518,Cluster-31803.53354,Cluster-31803.98485,Cluster-31803.74549,Cluster-31803.95433,Cluster-31803.93526,Cluster-31803.9120,Cluster-31803.70958,Cluster-31803.55475,Cluster-31803.77209,Cluster-31803.82070,Cluster-31803.71782,Cluster-31803.45484,Cluster-31803.28776,Cluster-31803.33595,Cluster-31803.54712,…
GO:0019901	protein kinase binding	molecular_function	1	2	Cluster-31803.6639,Cluster-31803.106118
GO:0016798	hydrolase activity, acting on glycosyl bonds	molecular_function	1	18	Cluster-31803.26197,Cluster-31803.103557,Cluster-31803.105554,Cluster-31803.31213,Cluster-31803.44221,Cluster-31803.84316,Cluster-31803.54317,Cluster-31803.94898,Cluster-31803.20998,Cluster-31803.28030,Cluster-31803.62104,Cluster-31803.40725,Cluster-31803.46994,Cluster-31803.62350,Cluster-31803.62016,Cluster-31803.31214,Cluster-31803.63940,Cluster-31803.42340
GO:0009435	NAD biosynthetic process	biological_process	1	1	Cluster-31803.71481
GO:0030554	adenyl nucleotide binding	molecular_function	1	120	Cluster-31803.39015,Cluster-31803.66661,Cluster-31803.44422,Cluster-31803.79832,Cluster-31803.19074,Cluster-31803.59602,Cluster-31803.101505,Cluster-31803.46994,Cluster-31803.64167,Cluster-31803.76770,Cluster-31803.69296,Cluster-31803.49765,Cluster-31803.65630,Cluster-31803.68257,Cluster-31803.35072,Cluster-31803.71264,Cluster-31803.38042,Cluster-31803.72329,Cluster-31803.47594,Cluster-31803.6639…
GO:0033897	ribonuclease T2 activity	molecular_function	1	1	Cluster-31803.27054
GO:0022412	cellular process involved in reproduction in multicellular organism	biological_process	1	8	Cluster-31803.54211,Cluster-31803.45632,Cluster-31803.92817,Cluster-31803.54463,Cluster-31803.68598,Cluster-31803.83110,Cluster-31803.46795,Cluster-31803.15545
GO:0006304	DNA modification	biological_process	1	3	Cluster-31803.25254,Cluster-31803.79448,Cluster-31803.102494
GO:0006595	polyamine metabolic process	biological_process	1	1	Cluster-31803.42340
GO:0006596	polyamine biosynthetic process	biological_process	1	1	Cluster-31803.42340
GO:0016782	transferase activity, transferring sulfur-containing groups	molecular_function	1	5	Cluster-31803.15935,Cluster-31803.108977,Cluster-31803.57725,Cluster-31803.94166,Cluster-31803.84316
GO:0044766	multi-organism transport	biological_process	1	1	Cluster-31803.86324
GO:0046794	transport of virus	biological_process	1	1	Cluster-31803.86324
GO:1902579	multi-organism localization	biological_process	1	1	Cluster-31803.86324
GO:0030430	host cell cytoplasm	cellular_component	1	2	Cluster-31803.100697,Cluster-31803.105902
GO:0016645	oxidoreductase activity, acting on the CH-NH group of donors	molecular_function	1	4	Cluster-31803.71782,Cluster-31803.77209,Cluster-31803.4794,Cluster-31803.45498
GO:0032559	adenyl ribonucleotide binding	molecular_function	1	119	Cluster-31803.75445,Cluster-31803.60636,Cluster-31803.98649,Cluster-31803.65440,Cluster-31803.44374,Cluster-31803.66591,Cluster-31803.40663,Cluster-31803.84659,Cluster-31803.41549,Cluster-31803.29294,Cluster-31803.65426,Cluster-31803.36923,Cluster-31803.38855,Cluster-31803.15588,Cluster-31803.54463,Cluster-31803.45498,Cluster-31803.102817,Cluster-31803.38106,Cluster-31803.58061,Cluster-31803.1813…
GO:0016830	carbon-carbon lyase activity	molecular_function	1	10	Cluster-31803.53354,Cluster-31803.42029,Cluster-31803.58329,Cluster-31803.24959,Cluster-31803.35115,Cluster-31803.77576,Cluster-31803.102494,Cluster-31803.27706,Cluster-31803.55575,Cluster-31803.41549
GO:0010629	negative regulation of gene expression	biological_process	1	3	Cluster-31803.94002,Cluster-31803.90853,Cluster-31803.101311
GO:0043174	nucleoside salvage	biological_process	1	1	Cluster-31803.102530
GO:0009260	ribonucleotide biosynthetic process	biological_process	1	9	Cluster-31803.47890,Cluster-31803.70958,Cluster-31803.37116,Cluster-31803.48689,Cluster-31803.47008,Cluster-31803.107323,Cluster-31803.25539,Cluster-31803.38042,Cluster-31803.76092
GO:0046390	ribose phosphate biosynthetic process	biological_process	1	9	Cluster-31803.25539,Cluster-31803.76092,Cluster-31803.38042,Cluster-31803.47008,Cluster-31803.107323,Cluster-31803.48689,Cluster-31803.70958,Cluster-31803.47890,Cluster-31803.37116
GO:0005044	scavenger receptor activity	molecular_function	1	2	Cluster-31803.95712,Cluster-31803.23780
GO:0038024	cargo receptor activity	molecular_function	1	2	Cluster-31803.23780,Cluster-31803.95712
GO:0015099	nickel cation transmembrane transporter activity	molecular_function	1	1	Cluster-31803.62959
GO:0035444	nickel cation transmembrane transport	biological_process	1	1	Cluster-31803.62959
GO:0097164	ammonium ion metabolic process	biological_process	1	1	Cluster-31803.42340
GO:0008200	ion channel inhibitor activity	molecular_function	1	11	Cluster-31803.40725,Cluster-31803.63151,Cluster-31803.66979,Cluster-31803.61898,Cluster-31803.45214,Cluster-31803.32535,Cluster-31803.54424,Cluster-31803.23568,Cluster-31803.57662,Cluster-31803.69543,Cluster-31803.48798
GO:0016248	channel inhibitor activity	molecular_function	1	11	Cluster-31803.66979,Cluster-31803.63151,Cluster-31803.61898,Cluster-31803.45214,Cluster-31803.40725,Cluster-31803.69543,Cluster-31803.48798,Cluster-31803.32535,Cluster-31803.57662,Cluster-31803.23568,Cluster-31803.54424
GO:0022892	substrate-specific transporter activity	molecular_function	1	61	Cluster-31803.91237,Cluster-31803.62959,Cluster-31803.74434,Cluster-31803.58329,Cluster-31803.33713,Cluster-31803.41140,Cluster-31803.58015,Cluster-31803.70958,Cluster-31803.45483,Cluster-31803.77209,Cluster-31803.54236,Cluster-31803.27706,Cluster-31803.105554,Cluster-31803.70952,Cluster-31803.8008,Cluster-31803.85955,Cluster-31803.16576,Cluster-31803.29237,Cluster-31803.65639,Cluster-31803.59364…
GO:0008686	3,4-dihydroxy-2-butanone-4-phosphate synthase activity	molecular_function	1	1	Cluster-31803.55575
GO:0006865	amino acid transport	biological_process	1	4	Cluster-31803.76092,Cluster-31803.70952,Cluster-31803.70958,Cluster-31803.42913
GO:0009605	response to external stimulus	biological_process	1	16	Cluster-31803.86310,Cluster-31803.88544,Cluster-31803.69742,Cluster-31803.85230,Cluster-31803.46994,Cluster-31803.66724,Cluster-31803.47890,Cluster-31803.30323,Cluster-31803.27182,Cluster-31803.71701,Cluster-31803.105582,Cluster-31803.91237,Cluster-31803.13827,Cluster-31803.41140,Cluster-31803.47741,Cluster-31803.91716
GO:0000139	Golgi membrane	cellular_component	1	4	Cluster-31803.92232,Cluster-31803.36429,Cluster-31803.25822,Cluster-31803.104362
GO:0009259	ribonucleotide metabolic process	biological_process	1	24	Cluster-31803.39821,Cluster-31803.70958,Cluster-31803.55475,Cluster-31803.72674,Cluster-31803.77209,Cluster-31803.25539,Cluster-31803.57530,Cluster-31803.38042,Cluster-31803.74400,Cluster-31803.44058,Cluster-31803.62748,Cluster-31803.48966,Cluster-31803.59602,Cluster-31803.48689,Cluster-31803.47890,Cluster-31803.40957,Cluster-31803.37116,Cluster-31803.21942,Cluster-31803.77576,Cluster-31803.76092…
GO:0042168	heme metabolic process	biological_process	1	6	Cluster-31803.38855,Cluster-31803.98485,Cluster-31803.24959,Cluster-31803.45498,Cluster-31803.4794,Cluster-31803.77576
GO:0006553	lysine metabolic process	biological_process	1	9	Cluster-31803.54712,Cluster-31803.72549,Cluster-31803.54710,Cluster-31803.28776,Cluster-31803.46795,Cluster-31803.76193,Cluster-31803.25826,Cluster-31803.25822,Cluster-31803.52297
GO:0005839	proteasome core complex	cellular_component	1	2	Cluster-31803.45750,Cluster-31803.95113
GO:0009893	positive regulation of metabolic process	biological_process	1	9	Cluster-31803.52989,Cluster-31803.32161,Cluster-31803.25822,Cluster-31803.25826,Cluster-31803.44221,Cluster-31803.91237,Cluster-31803.67069,Cluster-31803.48754,Cluster-31803.72458
GO:0008144	drug binding	molecular_function	1	1	Cluster-31803.79056
GO:0004332	fructose-bisphosphate aldolase activity	molecular_function	1	1	Cluster-31803.77576
GO:0006446	regulation of translational initiation	biological_process	1	6	Cluster-31803.62016,Cluster-31803.45483,Cluster-31803.21566,Cluster-31803.54317,Cluster-31803.18957,Cluster-31803.58375
GO:0005852	eukaryotic translation initiation factor 3 complex	cellular_component	1	4	Cluster-31803.58375,Cluster-31803.54317,Cluster-31803.45483,Cluster-31803.62016
GO:0015930	glutamate synthase activity	molecular_function	1	1	Cluster-31803.67069
GO:0004312	fatty acid synthase activity	molecular_function	1	1	Cluster-31803.21983
GO:0005835	fatty acid synthase complex	cellular_component	1	1	Cluster-31803.21983
GO:0009317	acetyl-CoA carboxylase complex	cellular_component	1	1	Cluster-31803.72329
GO:0071203	WASH complex	cellular_component	1	3	Cluster-31803.91701,Cluster-31803.29237,Cluster-31803.97049
GO:0006611	protein export from nucleus	biological_process	1	1	Cluster-31803.93098
GO:0006998	nuclear envelope organization	biological_process	1	1	Cluster-31803.93098
GO:0060255	regulation of macromolecule metabolic process	biological_process	1	100	Cluster-31803.91219,Cluster-31803.46681,Cluster-31803.33578,Cluster-31803.36206,Cluster-31803.45484,Cluster-31803.54317,Cluster-31803.15518,Cluster-31803.45483,Cluster-31803.42009,Cluster-31803.55475,Cluster-31803.97871,Cluster-31803.95433,Cluster-31803.31213,Cluster-31803.101418,Cluster-31803.69518,Cluster-31803.65639,Cluster-31803.62016,Cluster-31803.51240,Cluster-31803.81410,Cluster-31803.4585…
GO:0004089	carbonate dehydratase activity	molecular_function	1	1	Cluster-31803.59210
GO:0015075	ion transmembrane transporter activity	molecular_function	1	54	Cluster-31803.57662,Cluster-31803.18763,Cluster-31803.76092,Cluster-31803.59364,Cluster-31803.65639,Cluster-31803.13295,Cluster-31803.35624,Cluster-31803.72117,Cluster-31803.54240,Cluster-31803.43490,Cluster-31803.71701,Cluster-31803.23780,Cluster-31803.33713,Cluster-31803.74434,Cluster-31803.58329,Cluster-31803.62959,Cluster-31803.16576,Cluster-31803.85955,Cluster-31803.29237,Cluster-31803.70952…
GO:0008509	anion transmembrane transporter activity	molecular_function	1	8	Cluster-31803.70952,Cluster-31803.69139,Cluster-31803.29237,Cluster-31803.70958,Cluster-31803.43490,Cluster-31803.76092,Cluster-31803.42913,Cluster-31803.58329
GO:0009523	photosystem II	cellular_component	1	7	Cluster-31803.67069,Cluster-31803.48726,Cluster-31803.91237,Cluster-31803.47741,Cluster-31803.108194,Cluster-31803.63981,Cluster-31803.67031
GO:0015293	symporter activity	molecular_function	1	2	Cluster-31803.36429,Cluster-31803.92232
GO:0015294	solute:cation symporter activity	molecular_function	1	2	Cluster-31803.36429,Cluster-31803.92232
GO:0046677	response to antibiotic	biological_process	1	1	Cluster-31803.61344
GO:0015675	nickel cation transport	biological_process	1	1	Cluster-31803.62959
GO:0042742	defense response to bacterium	biological_process	1	6	Cluster-31803.46994,Cluster-31803.86310,Cluster-31803.27182,Cluster-31803.69742,Cluster-31803.47741,Cluster-31803.66724
GO:0046939	nucleotide phosphorylation	biological_process	1	6	Cluster-31803.40957,Cluster-31803.59602,Cluster-31803.21942,Cluster-31803.44058,Cluster-31803.77576,Cluster-31803.57530
GO:0020012	evasion or tolerance of host immune response	biological_process	1	1	Cluster-31803.88544
GO:0051805	evasion or tolerance of immune response of other organism involved in symbiotic interaction	biological_process	1	1	Cluster-31803.88544
GO:0052564	response to immune response of other organism involved in symbiotic interaction	biological_process	1	1	Cluster-31803.88544
GO:0052572	response to host immune response	biological_process	1	1	Cluster-31803.88544
GO:0016756	glutathione gamma-glutamylcysteinyltransferase activity	molecular_function	1	1	Cluster-31803.15979
GO:0046937	phytochelatin metabolic process	biological_process	1	1	Cluster-31803.15979
GO:0046938	phytochelatin biosynthetic process	biological_process	1	1	Cluster-31803.15979
GO:0010876	lipid localization	biological_process	1	4	Cluster-31803.23749,Cluster-31803.69543,Cluster-31803.92931,Cluster-31803.43520
GO:0031214	biomineral tissue development	biological_process	1	1	Cluster-31803.41951
GO:0070167	regulation of biomineral tissue development	biological_process	1	1	Cluster-31803.41951
GO:0042126	nitrate metabolic process	biological_process	1	2	Cluster-31803.98072,Cluster-31803.63151
GO:0042128	nitrate assimilation	biological_process	1	2	Cluster-31803.98072,Cluster-31803.63151
GO:0009617	response to bacterium	biological_process	1	6	Cluster-31803.66724,Cluster-31803.27182,Cluster-31803.69742,Cluster-31803.47741,Cluster-31803.86310,Cluster-31803.46994
GO:0032504	multicellular organism reproduction	biological_process	1	11	Cluster-31803.54463,Cluster-31803.68598,Cluster-31803.83110,Cluster-31803.15545,Cluster-31803.46795,Cluster-31803.54211,Cluster-31803.84160,Cluster-31803.45632,Cluster-31803.49879,Cluster-31803.61564,Cluster-31803.92817
GO:0003857	3-hydroxyacyl-CoA dehydrogenase activity	molecular_function	1	5	Cluster-31803.52297,Cluster-31803.46795,Cluster-31803.54710,Cluster-31803.54712,Cluster-31803.72549
GO:0048856	anatomical structure development	biological_process	1	16	Cluster-31803.83110,Cluster-31803.41951,Cluster-31803.15545,Cluster-31803.74462,Cluster-31803.46795,Cluster-31803.54463,Cluster-31803.45498,Cluster-31803.25903,Cluster-31803.92817,Cluster-31803.54211,Cluster-31803.41140,Cluster-31803.91716,Cluster-31803.68598,Cluster-31803.45632,Cluster-31803.71701,Cluster-31803.62576
GO:0005750	mitochondrial respiratory chain complex III	cellular_component	1	1	Cluster-31803.48966
GO:0045275	respiratory chain complex III	cellular_component	1	1	Cluster-31803.48966
GO:0016247	channel regulator activity	molecular_function	1	11	Cluster-31803.32535,Cluster-31803.54424,Cluster-31803.23568,Cluster-31803.57662,Cluster-31803.69543,Cluster-31803.48798,Cluster-31803.40725,Cluster-31803.61898,Cluster-31803.63151,Cluster-31803.66979,Cluster-31803.45214
GO:0007600	sensory perception	biological_process	1	1	Cluster-31803.9120
GO:0050877	neurological system process	biological_process	1	1	Cluster-31803.9120
GO:0016773	phosphotransferase activity, alcohol group as acceptor	molecular_function	1	55	Cluster-31803.66591,Cluster-31803.68814,Cluster-31803.81384,Cluster-31803.40663,Cluster-31803.65440,Cluster-31803.79056,Cluster-31803.64155,Cluster-31803.108237,Cluster-31803.75445,Cluster-31803.65630,Cluster-31803.68257,Cluster-31803.18133,Cluster-31803.58061,Cluster-31803.102830,Cluster-31803.54463,Cluster-31803.47594,Cluster-31803.25903,Cluster-31803.69139,Cluster-31803.45055,Cluster-31803.680…
GO:0031347	regulation of defense response	biological_process	1	1	Cluster-31803.27182
GO:0016272	prefoldin complex	cellular_component	1	2	Cluster-31803.82761,Cluster-31803.49084
GO:0006122	mitochondrial electron transport, ubiquinol to cytochrome c	biological_process	1	1	Cluster-31803.48966
GO:0015631	tubulin binding	molecular_function	1	7	Cluster-31803.39101,Cluster-31803.6639,Cluster-31803.65639,Cluster-31803.91237,Cluster-31803.55475,Cluster-31803.73411,Cluster-31803.67849
GO:0006097	glyoxylate cycle	biological_process	1	1	Cluster-31803.58329
GO:1901657	glycosyl compound metabolic process	biological_process	1	29	Cluster-31803.72674,Cluster-31803.77209,Cluster-31803.55475,Cluster-31803.70958,Cluster-31803.39821,Cluster-31803.48966,Cluster-31803.97049,Cluster-31803.18502,Cluster-31803.62748,Cluster-31803.44058,Cluster-31803.74400,Cluster-31803.57530,Cluster-31803.38042,Cluster-31803.99504,Cluster-31803.37116,Cluster-31803.40957,Cluster-31803.39022,Cluster-31803.47890,Cluster-31803.102530,Cluster-31803.3820…
GO:0019900	kinase binding	molecular_function	1	2	Cluster-31803.6639,Cluster-31803.106118
GO:2001057	reactive nitrogen species metabolic process	biological_process	1	2	Cluster-31803.98072,Cluster-31803.63151
GO:0072509	divalent inorganic cation transmembrane transporter activity	molecular_function	1	9	Cluster-31803.107832,Cluster-31803.54463,Cluster-31803.33713,Cluster-31803.14245,Cluster-31803.45483,Cluster-31803.35654,Cluster-31803.54236,Cluster-31803.93098,Cluster-31803.54240
GO:0030682	evasion or tolerance of host defense response	biological_process	1	1	Cluster-31803.88544
GO:0051807	evasion or tolerance of defense response of other organism involved in symbiotic interaction	biological_process	1	1	Cluster-31803.88544
GO:1901070	guanosine-containing compound biosynthetic process	biological_process	1	1	Cluster-31803.38042
GO:0031325	positive regulation of cellular metabolic process	biological_process	1	8	Cluster-31803.44221,Cluster-31803.32161,Cluster-31803.25822,Cluster-31803.52989,Cluster-31803.25826,Cluster-31803.72458,Cluster-31803.91237,Cluster-31803.48754
GO:0050660	flavin adenine dinucleotide binding	molecular_function	1	14	Cluster-31803.48726,Cluster-31803.80077,Cluster-31803.69335,Cluster-31803.29666,Cluster-31803.79189,Cluster-31803.23463,Cluster-31803.85230,Cluster-31803.91464,Cluster-31803.72549,Cluster-31803.69721,Cluster-31803.98072,Cluster-31803.56122,Cluster-31803.30686,Cluster-31803.66090
GO:0071973	bacterial-type flagellum-dependent cell motility	biological_process	1	2	Cluster-31803.30323,Cluster-31803.13827
GO:0016788	hydrolase activity, acting on ester bonds	molecular_function	1	48	Cluster-31803.15455,Cluster-31803.95022,Cluster-31803.46675,Cluster-31803.42838,Cluster-31803.32535,Cluster-31803.100522,Cluster-31803.24311,Cluster-31803.51240,Cluster-31803.90461,Cluster-31803.75133,Cluster-31803.53448,Cluster-31803.74871,Cluster-31803.70281,Cluster-31803.14138,Cluster-31803.30779,Cluster-31803.64574,Cluster-31803.52171,Cluster-31803.36206,Cluster-31803.51248,Cluster-31803.2317…
GO:0006206	pyrimidine nucleobase metabolic process	biological_process	1	14	Cluster-31803.51719,Cluster-31803.48726,Cluster-31803.36923,Cluster-31803.93098,Cluster-31803.46305,Cluster-31803.25438,Cluster-31803.59911,Cluster-31803.73246,Cluster-31803.107323,Cluster-31803.46681,Cluster-31803.71782,Cluster-31803.71264,Cluster-31803.94898,Cluster-31803.46767
GO:0019674	NAD metabolic process	biological_process	1	1	Cluster-31803.71481
GO:0019866	organelle inner membrane	cellular_component	1	8	Cluster-31803.72674,Cluster-31803.70958,Cluster-31803.48966,Cluster-31803.74308,Cluster-31803.43812,Cluster-31803.47008,Cluster-31803.43813,Cluster-31803.76092
GO:0007029	endoplasmic reticulum organization	biological_process	1	1	Cluster-31803.76770
GO:0016892	endoribonuclease activity, producing 3'-phosphomonoesters	molecular_function	1	1	Cluster-31803.27054
GO:0009098	leucine biosynthetic process	biological_process	1	2	Cluster-31803.75298,Cluster-31803.33595
GO:0016209	antioxidant activity	molecular_function	1	6	Cluster-31803.59210,Cluster-31803.48726,Cluster-31803.55383,Cluster-31803.64574,Cluster-31803.44374,Cluster-31803.65426
GO:0006265	DNA topological change	biological_process	1	3	Cluster-31803.80840,Cluster-31803.65426,Cluster-31803.38656
GO:0032787	monocarboxylic acid metabolic process	biological_process	1	26	Cluster-31803.80077,Cluster-31803.29666,Cluster-31803.48689,Cluster-31803.59602,Cluster-31803.15683,Cluster-31803.37116,Cluster-31803.40957,Cluster-31803.4794,Cluster-31803.63151,Cluster-31803.54710,Cluster-31803.77576,Cluster-31803.21942,Cluster-31803.107323,Cluster-31803.26272,Cluster-31803.52297,Cluster-31803.27706,Cluster-31803.72329,Cluster-31803.44058,Cluster-31803.57530,Cluster-31803.46795…
GO:0008544	epidermis development	biological_process	1	2	Cluster-31803.45498,Cluster-31803.54211
GO:0007157	heterophilic cell-cell adhesion via plasma membrane cell adhesion molecules	biological_process	1	1	Cluster-31803.59478
GO:0006979	response to oxidative stress	biological_process	1	3	Cluster-31803.48726,Cluster-31803.64574,Cluster-31803.68814
GO:0016796	exonuclease activity, active with either ribo- or deoxyribonucleic acids and producing 5'-phosphomonoesters	molecular_function	1	4	Cluster-31803.68814,Cluster-31803.19238,Cluster-31803.22459,Cluster-31803.85230
GO:0000785	chromatin	cellular_component	1	5	Cluster-31803.85714,Cluster-31803.84160,Cluster-31803.103557,Cluster-31803.49879,Cluster-31803.59364
GO:0014065	phosphatidylinositol 3-kinase signaling	biological_process	1	1	Cluster-31803.81410
GO:0014066	regulation of phosphatidylinositol 3-kinase signaling	biological_process	1	1	Cluster-31803.81410
GO:0014068	positive regulation of phosphatidylinositol 3-kinase signaling	biological_process	1	1	Cluster-31803.81410
GO:0043548	phosphatidylinositol 3-kinase binding	molecular_function	1	1	Cluster-31803.81410
GO:0003840	gamma-glutamyltransferase activity	molecular_function	1	1	Cluster-31803.26272
GO:0006692	prostanoid metabolic process	biological_process	1	1	Cluster-31803.26272
GO:0006693	prostaglandin metabolic process	biological_process	1	1	Cluster-31803.26272
GO:0007094	mitotic spindle assembly checkpoint	biological_process	1	2	Cluster-31803.23353,Cluster-31803.52096
GO:0009895	negative regulation of catabolic process	biological_process	1	2	Cluster-31803.23353,Cluster-31803.52096
GO:0031330	negative regulation of cellular catabolic process	biological_process	1	2	Cluster-31803.23353,Cluster-31803.52096
GO:0031396	regulation of protein ubiquitination	biological_process	1	2	Cluster-31803.23353,Cluster-31803.52096
GO:0031397	negative regulation of protein ubiquitination	biological_process	1	2	Cluster-31803.52096,Cluster-31803.23353
GO:0031577	spindle checkpoint	biological_process	1	2	Cluster-31803.52096,Cluster-31803.23353
GO:0032435	negative regulation of proteasomal ubiquitin-dependent protein catabolic process	biological_process	1	2	Cluster-31803.23353,Cluster-31803.52096
GO:0033046	negative regulation of sister chromatid segregation	biological_process	1	2	Cluster-31803.52096,Cluster-31803.23353
GO:0033048	negative regulation of mitotic sister chromatid segregation	biological_process	1	2	Cluster-31803.52096,Cluster-31803.23353
GO:0042177	negative regulation of protein catabolic process	biological_process	1	2	Cluster-31803.52096,Cluster-31803.23353
GO:0045839	negative regulation of mitotic nuclear division	biological_process	1	2	Cluster-31803.23353,Cluster-31803.52096
GO:0045841	negative regulation of mitotic metaphase/anaphase transition	biological_process	1	2	Cluster-31803.23353,Cluster-31803.52096
GO:0051340	regulation of ligase activity	biological_process	1	2	Cluster-31803.52096,Cluster-31803.23353
GO:0051352	negative regulation of ligase activity	biological_process	1	2	Cluster-31803.23353,Cluster-31803.52096
GO:0051436	negative regulation of ubiquitin-protein ligase activity involved in mitotic cell cycle	biological_process	1	2	Cluster-31803.52096,Cluster-31803.23353
GO:0051438	regulation of ubiquitin-protein transferase activity	biological_process	1	2	Cluster-31803.52096,Cluster-31803.23353
GO:0051439	regulation of ubiquitin-protein ligase activity involved in mitotic cell cycle	biological_process	1	2	Cluster-31803.52096,Cluster-31803.23353
GO:0051444	negative regulation of ubiquitin-protein transferase activity	biological_process	1	2	Cluster-31803.52096,Cluster-31803.23353
GO:0051985	negative regulation of chromosome segregation	biological_process	1	2	Cluster-31803.52096,Cluster-31803.23353
GO:0071173	spindle assembly checkpoint	biological_process	1	2	Cluster-31803.23353,Cluster-31803.52096
GO:0071174	mitotic spindle checkpoint	biological_process	1	2	Cluster-31803.52096,Cluster-31803.23353
GO:1901799	negative regulation of proteasomal protein catabolic process	biological_process	1	2	Cluster-31803.52096,Cluster-31803.23353
GO:1902100	negative regulation of metaphase/anaphase transition of cell cycle	biological_process	1	2	Cluster-31803.23353,Cluster-31803.52096
GO:1903051	negative regulation of proteolysis involved in cellular protein catabolic process	biological_process	1	2	Cluster-31803.23353,Cluster-31803.52096
GO:1903320	regulation of protein modification by small protein conjugation or removal	biological_process	1	2	Cluster-31803.23353,Cluster-31803.52096
GO:1903321	negative regulation of protein modification by small protein conjugation or removal	biological_process	1	2	Cluster-31803.23353,Cluster-31803.52096
GO:1903363	negative regulation of cellular protein catabolic process	biological_process	1	2	Cluster-31803.52096,Cluster-31803.23353
GO:1904666	regulation of ubiquitin protein ligase activity	biological_process	1	2	Cluster-31803.23353,Cluster-31803.52096
GO:1904667	negative regulation of ubiquitin protein ligase activity	biological_process	1	2	Cluster-31803.52096,Cluster-31803.23353
GO:2000816	negative regulation of mitotic sister chromatid separation	biological_process	1	2	Cluster-31803.52096,Cluster-31803.23353
GO:2001251	negative regulation of chromosome organization	biological_process	1	2	Cluster-31803.23353,Cluster-31803.52096
GO:0006396	RNA processing	biological_process	1	49	Cluster-31803.26254,Cluster-31803.53443,Cluster-31803.13030,Cluster-31803.45483,Cluster-31803.48726,Cluster-31803.30779,Cluster-31803.46795,Cluster-31803.18502,Cluster-31803.72549,Cluster-31803.34484,Cluster-31803.87789,Cluster-31803.79189,Cluster-31803.46675,Cluster-31803.38204,Cluster-31803.53854,Cluster-31803.43812,Cluster-31803.65639,Cluster-31803.107323,Cluster-31803.88081,Cluster-31803.5124…
GO:0017016	Ras GTPase binding	molecular_function	1	3	Cluster-31803.59364,Cluster-31803.78065,Cluster-31803.91237
GO:0031267	small GTPase binding	molecular_function	1	3	Cluster-31803.91237,Cluster-31803.78065,Cluster-31803.59364
GO:0051020	GTPase binding	molecular_function	1	3	Cluster-31803.78065,Cluster-31803.91237,Cluster-31803.59364
GO:0045298	tubulin complex	cellular_component	1	7	Cluster-31803.91237,Cluster-31803.6639,Cluster-31803.65639,Cluster-31803.39101,Cluster-31803.55475,Cluster-31803.73411,Cluster-31803.67849
GO:0030545	receptor regulator activity	molecular_function	1	2	Cluster-31803.55037,Cluster-31803.58906
GO:0030547	receptor inhibitor activity	molecular_function	1	2	Cluster-31803.58906,Cluster-31803.55037
GO:0030548	acetylcholine receptor regulator activity	molecular_function	1	2	Cluster-31803.58906,Cluster-31803.55037
GO:0030550	acetylcholine receptor inhibitor activity	molecular_function	1	2	Cluster-31803.55037,Cluster-31803.58906
GO:0030529	ribonucleoprotein complex	cellular_component	1	39	Cluster-31803.82992,Cluster-31803.42340,Cluster-31803.13126,Cluster-31803.58375,Cluster-31803.7700,Cluster-31803.79832,Cluster-31803.53273,Cluster-31803.18957,Cluster-31803.96761,Cluster-31803.42524,Cluster-31803.40352,Cluster-31803.108977,Cluster-31803.52926,Cluster-31803.62576,Cluster-31803.43813,Cluster-31803.83172,Cluster-31803.66090,Cluster-31803.65936,Cluster-31803.96355,Cluster-31803.10002…
GO:0010941	regulation of cell death	biological_process	1	3	Cluster-31803.69296,Cluster-31803.15545,Cluster-31803.38204
GO:0042981	regulation of apoptotic process	biological_process	1	3	Cluster-31803.38204,Cluster-31803.15545,Cluster-31803.69296
GO:0043067	regulation of programmed cell death	biological_process	1	3	Cluster-31803.69296,Cluster-31803.15545,Cluster-31803.38204
GO:0046034	ATP metabolic process	biological_process	1	19	Cluster-31803.39821,Cluster-31803.70958,Cluster-31803.55475,Cluster-31803.77209,Cluster-31803.72674,Cluster-31803.57530,Cluster-31803.74400,Cluster-31803.44058,Cluster-31803.62748,Cluster-31803.48966,Cluster-31803.59602,Cluster-31803.47890,Cluster-31803.40957,Cluster-31803.21942,Cluster-31803.77576,Cluster-31803.76092,Cluster-31803.57662,Cluster-31803.47008,Cluster-31803.42219
GO:0001539	cilium or flagellum-dependent cell motility	biological_process	1	2	Cluster-31803.13827,Cluster-31803.30323
GO:0097588	archaeal or bacterial-type flagellum-dependent cell motility	biological_process	1	2	Cluster-31803.30323,Cluster-31803.13827
GO:0033646	host intracellular part	cellular_component	1	9	Cluster-31803.100697,Cluster-31803.61089,Cluster-31803.91219,Cluster-31803.73411,Cluster-31803.42009,Cluster-31803.105902,Cluster-31803.60827,Cluster-31803.41973,Cluster-31803.42361
GO:0043656	intracellular region of host	cellular_component	1	9	Cluster-31803.61089,Cluster-31803.91219,Cluster-31803.100697,Cluster-31803.73411,Cluster-31803.42009,Cluster-31803.105902,Cluster-31803.41973,Cluster-31803.42361,Cluster-31803.60827
GO:0006006	glucose metabolic process	biological_process	1	7	Cluster-31803.59602,Cluster-31803.21942,Cluster-31803.44058,Cluster-31803.57530,Cluster-31803.77576,Cluster-31803.40957,Cluster-31803.53354
GO:0009157	deoxyribonucleoside monophosphate biosynthetic process	biological_process	1	1	Cluster-31803.71782
GO:0009176	pyrimidine deoxyribonucleoside monophosphate metabolic process	biological_process	1	1	Cluster-31803.71782
GO:0009177	pyrimidine deoxyribonucleoside monophosphate biosynthetic process	biological_process	1	1	Cluster-31803.71782
GO:0004140	dephospho-CoA kinase activity	molecular_function	1	1	Cluster-31803.107323
GO:0030001	metal ion transport	biological_process	1	36	Cluster-31803.107832,Cluster-31803.82470,Cluster-31803.49879,Cluster-31803.90853,Cluster-31803.4794,Cluster-31803.25822,Cluster-31803.105902,Cluster-31803.14245,Cluster-31803.58906,Cluster-31803.54463,Cluster-31803.55037,Cluster-31803.93098,Cluster-31803.98649,Cluster-31803.35654,Cluster-31803.90956,Cluster-31803.25826,Cluster-31803.59364,Cluster-31803.18763,Cluster-31803.100697,Cluster-31803.542…
GO:0009891	positive regulation of biosynthetic process	biological_process	1	4	Cluster-31803.25826,Cluster-31803.25822,Cluster-31803.72458,Cluster-31803.44221
GO:0010557	positive regulation of macromolecule biosynthetic process	biological_process	1	4	Cluster-31803.72458,Cluster-31803.44221,Cluster-31803.25826,Cluster-31803.25822
GO:0031328	positive regulation of cellular biosynthetic process	biological_process	1	4	Cluster-31803.25822,Cluster-31803.25826,Cluster-31803.72458,Cluster-31803.44221
GO:0051173	positive regulation of nitrogen compound metabolic process	biological_process	1	4	Cluster-31803.25822,Cluster-31803.25826,Cluster-31803.72458,Cluster-31803.44221
GO:0010628	positive regulation of gene expression	biological_process	1	4	Cluster-31803.25826,Cluster-31803.25822,Cluster-31803.72458,Cluster-31803.44221
GO:1901988	negative regulation of cell cycle phase transition	biological_process	1	2	Cluster-31803.23353,Cluster-31803.52096
GO:1901991	negative regulation of mitotic cell cycle phase transition	biological_process	1	2	Cluster-31803.52096,Cluster-31803.23353
GO:0010468	regulation of gene expression	biological_process	1	91	Cluster-31803.81673,Cluster-31803.86873,Cluster-31803.40334,Cluster-31803.25899,Cluster-31803.26272,Cluster-31803.95747,Cluster-31803.85714,Cluster-31803.21566,Cluster-31803.23170,Cluster-31803.67069,Cluster-31803.75298,Cluster-31803.57530,Cluster-31803.72458,Cluster-31803.30779,Cluster-31803.74871,Cluster-31803.31653,Cluster-31803.85955,Cluster-31803.61344,Cluster-31803.53273,Cluster-31803.85230…
GO:0005664	nuclear origin of replication recognition complex	cellular_component	1	1	Cluster-31803.38204
GO:0006551	leucine metabolic process	biological_process	1	7	Cluster-31803.72549,Cluster-31803.33595,Cluster-31803.54712,Cluster-31803.75298,Cluster-31803.46795,Cluster-31803.52297,Cluster-31803.54710
GO:0009221	pyrimidine deoxyribonucleotide biosynthetic process	biological_process	1	1	Cluster-31803.71782
GO:0009263	deoxyribonucleotide biosynthetic process	biological_process	1	1	Cluster-31803.71782
GO:0009265	2'-deoxyribonucleotide biosynthetic process	biological_process	1	1	Cluster-31803.71782
GO:0046385	deoxyribose phosphate biosynthetic process	biological_process	1	1	Cluster-31803.71782
GO:0006012	galactose metabolic process	biological_process	1	3	Cluster-31803.54317,Cluster-31803.21942,Cluster-31803.62016
GO:0016829	lyase activity	molecular_function	1	23	Cluster-31803.57725,Cluster-31803.6659,Cluster-31803.33376,Cluster-31803.35115,Cluster-31803.102494,Cluster-31803.77576,Cluster-31803.53354,Cluster-31803.24959,Cluster-31803.33273,Cluster-31803.104927,Cluster-31803.41549,Cluster-31803.55575,Cluster-31803.82070,Cluster-31803.59210,Cluster-31803.27706,Cluster-31803.95113,Cluster-31803.25539,Cluster-31803.15518,Cluster-31803.45498,Cluster-31803.1382…
GO:0007093	mitotic cell cycle checkpoint	biological_process	1	2	Cluster-31803.23353,Cluster-31803.52096
GO:0005795	Golgi stack	cellular_component	1	1	Cluster-31803.104362
GO:0009162	deoxyribonucleoside monophosphate metabolic process	biological_process	1	1	Cluster-31803.71782
GO:0044283	small molecule biosynthetic process	biological_process	1	37	Cluster-31803.21942,Cluster-31803.88544,Cluster-31803.69518,Cluster-31803.107323,Cluster-31803.93525,Cluster-31803.37116,Cluster-31803.45484,Cluster-31803.46795,Cluster-31803.71782,Cluster-31803.28776,Cluster-31803.33595,Cluster-31803.72549,Cluster-31803.54712,Cluster-31803.67069,Cluster-31803.75298,Cluster-31803.93526,Cluster-31803.55575,Cluster-31803.77209,Cluster-31803.82070,Cluster-31803.5547…
GO:0016814	hydrolase activity, acting on carbon-nitrogen (but not peptide) bonds, in cyclic amidines	molecular_function	1	2	Cluster-31803.80840,Cluster-31803.88544
GO:0016462	pyrophosphatase activity	molecular_function	1	59	Cluster-31803.30323,Cluster-31803.55859,Cluster-31803.14245,Cluster-31803.76770,Cluster-31803.64167,Cluster-31803.26592,Cluster-31803.19074,Cluster-31803.44422,Cluster-31803.105483,Cluster-31803.61344,Cluster-31803.54524,Cluster-31803.75518,Cluster-31803.64155,Cluster-31803.90956,Cluster-31803.60636,Cluster-31803.44374,Cluster-31803.65426,Cluster-31803.41973,Cluster-31803.15588,Cluster-31803.6639…
GO:0019872	streptomycin biosynthetic process	biological_process	1	1	Cluster-31803.21942
GO:0030647	aminoglycoside antibiotic metabolic process	biological_process	1	1	Cluster-31803.21942
GO:0030648	aminoglycoside antibiotic biosynthetic process	biological_process	1	1	Cluster-31803.21942
GO:0046173	polyol biosynthetic process	biological_process	1	1	Cluster-31803.21942
GO:0046343	streptomycin metabolic process	biological_process	1	1	Cluster-31803.21942
GO:0044413	avoidance of host defenses	biological_process	1	1	Cluster-31803.88544
GO:0044415	evasion or tolerance of host defenses	biological_process	1	1	Cluster-31803.88544
GO:0051832	avoidance of defenses of other organism involved in symbiotic interaction	biological_process	1	1	Cluster-31803.88544
GO:0051834	evasion or tolerance of defenses of other organism involved in symbiotic interaction	biological_process	1	1	Cluster-31803.88544
GO:0052173	response to defenses of other organism involved in symbiotic interaction	biological_process	1	1	Cluster-31803.88544
GO:0052200	response to host defenses	biological_process	1	1	Cluster-31803.88544
GO:0075136	response to host	biological_process	1	1	Cluster-31803.88544
GO:0010638	positive regulation of organelle organization	biological_process	1	2	Cluster-31803.38204,Cluster-31803.15545
GO:0015749	monosaccharide transport	biological_process	1	1	Cluster-31803.86324
GO:0016311	dephosphorylation	biological_process	1	5	Cluster-31803.100522,Cluster-31803.24311,Cluster-31803.64574,Cluster-31803.45055,Cluster-31803.75133
GO:0004427	inorganic diphosphatase activity	molecular_function	1	1	Cluster-31803.74400
GO:0019058	viral life cycle	biological_process	1	16	Cluster-31803.54117,Cluster-31803.6659,Cluster-31803.79185,Cluster-31803.63631,Cluster-31803.77576,Cluster-31803.74993,Cluster-31803.44422,Cluster-31803.41973,Cluster-31803.29294,Cluster-31803.74871,Cluster-31803.30779,Cluster-31803.36206,Cluster-31803.24266,Cluster-31803.35937,Cluster-31803.91237,Cluster-31803.101533
GO:0045259	proton-transporting ATP synthase complex	cellular_component	1	4	Cluster-31803.47008,Cluster-31803.47890,Cluster-31803.70958,Cluster-31803.76092
GO:0005524	ATP binding	molecular_function	1	117	Cluster-31803.55475,Cluster-31803.70202,Cluster-31803.84665,Cluster-31803.97871,Cluster-31803.87059,Cluster-31803.71874,Cluster-31803.28776,Cluster-31803.39379,Cluster-31803.58700,Cluster-31803.79266,Cluster-31803.40265,Cluster-31803.10715,Cluster-31803.51447,Cluster-31803.95022,Cluster-31803.46675,Cluster-31803.87789,Cluster-31803.24020,Cluster-31803.26007,Cluster-31803.55854,Cluster-31803.10141…
GO:0016638	oxidoreductase activity, acting on the CH-NH2 group of donors	molecular_function	1	3	Cluster-31803.45484,Cluster-31803.45486,Cluster-31803.67069
GO:0045930	negative regulation of mitotic cell cycle	biological_process	1	2	Cluster-31803.23353,Cluster-31803.52096
GO:0043233	organelle lumen	cellular_component	1	53	Cluster-31803.15518,Cluster-31803.57530,Cluster-31803.46767,Cluster-31803.36206,Cluster-31803.46681,Cluster-31803.59911,Cluster-31803.62959,Cluster-31803.64597,Cluster-31803.85955,Cluster-31803.46305,Cluster-31803.74549,Cluster-31803.97871,Cluster-31803.26254,Cluster-31803.45483,Cluster-31803.15368,Cluster-31803.64612,Cluster-31803.46340,Cluster-31803.78456,Cluster-31803.64605,Cluster-31803.81410…
GO:0070013	intracellular organelle lumen	cellular_component	1	53	Cluster-31803.97871,Cluster-31803.26254,Cluster-31803.46305,Cluster-31803.85955,Cluster-31803.74549,Cluster-31803.45483,Cluster-31803.36206,Cluster-31803.15518,Cluster-31803.46767,Cluster-31803.57530,Cluster-31803.59911,Cluster-31803.64597,Cluster-31803.62959,Cluster-31803.46681,Cluster-31803.31069,Cluster-31803.21799,Cluster-31803.64617,Cluster-31803.39118,Cluster-31803.23749,Cluster-31803.61564…
GO:0015077	monovalent inorganic cation transmembrane transporter activity	molecular_function	1	25	Cluster-31803.49879,Cluster-31803.47890,Cluster-31803.23780,Cluster-31803.62576,Cluster-31803.71701,Cluster-31803.59364,Cluster-31803.57662,Cluster-31803.76092,Cluster-31803.18763,Cluster-31803.69005,Cluster-31803.29054,Cluster-31803.42219,Cluster-31803.39821,Cluster-31803.16576,Cluster-31803.68814,Cluster-31803.41140,Cluster-31803.70958,Cluster-31803.72674,Cluster-31803.77209,Cluster-31803.27706…
GO:0018874	benzoate metabolic process	biological_process	1	5	Cluster-31803.54710,Cluster-31803.46795,Cluster-31803.52297,Cluster-31803.72549,Cluster-31803.54712
GO:0005048	signal sequence binding	molecular_function	1	1	Cluster-31803.26254
GO:0051784	negative regulation of nuclear division	biological_process	1	2	Cluster-31803.52096,Cluster-31803.23353
GO:0006541	glutamine metabolic process	biological_process	1	2	Cluster-31803.69518,Cluster-31803.54211
GO:0043603	cellular amide metabolic process	biological_process	1	50	Cluster-31803.21566,Cluster-31803.75438,Cluster-31803.71701,Cluster-31803.37116,Cluster-31803.51447,Cluster-31803.82464,Cluster-31803.51122,Cluster-31803.95747,Cluster-31803.29590,Cluster-31803.62016,Cluster-31803.107323,Cluster-31803.40334,Cluster-31803.74993,Cluster-31803.26272,Cluster-31803.60760,Cluster-31803.77209,Cluster-31803.45483,Cluster-31803.41140,Cluster-31803.54317,Cluster-31803.2877…
GO:0009512	cytochrome b6f complex	cellular_component	1	1	Cluster-31803.79185
GO:0016149	translation release factor activity, codon specific	molecular_function	1	1	Cluster-31803.42340
GO:0017150	tRNA dihydrouridine synthase activity	molecular_function	1	1	Cluster-31803.79189
GO:0019079	viral genome replication	biological_process	1	7	Cluster-31803.30779,Cluster-31803.44422,Cluster-31803.74993,Cluster-31803.35937,Cluster-31803.24266,Cluster-31803.79185,Cluster-31803.63631
GO:0003899	DNA-directed RNA polymerase activity	molecular_function	1	9	Cluster-31803.46681,Cluster-31803.59911,Cluster-31803.46767,Cluster-31803.94898,Cluster-31803.51719,Cluster-31803.25438,Cluster-31803.46305,Cluster-31803.93098,Cluster-31803.36923
GO:0031012	extracellular matrix	cellular_component	1	4	Cluster-31803.42219,Cluster-31803.45966,Cluster-31803.11135,Cluster-31803.31213
GO:0044712	single-organism catabolic process	biological_process	1	22	Cluster-31803.76193,Cluster-31803.46795,Cluster-31803.36206,Cluster-31803.57530,Cluster-31803.44058,Cluster-31803.54712,Cluster-31803.9809,Cluster-31803.72549,Cluster-31803.52297,Cluster-31803.23353,Cluster-31803.46305,Cluster-31803.64574,Cluster-31803.21942,Cluster-31803.77576,Cluster-31803.54710,Cluster-31803.21601,Cluster-31803.59602,Cluster-31803.80077,Cluster-31803.52096,Cluster-31803.63151,…
GO:0034645	cellular macromolecule biosynthetic process	biological_process	1	169	Cluster-31803.85714,Cluster-31803.89407,Cluster-31803.51122,Cluster-31803.71701,Cluster-31803.51719,Cluster-31803.64617,Cluster-31803.31069,Cluster-31803.25438,Cluster-31803.38204,Cluster-31803.21566,Cluster-31803.39118,Cluster-31803.61564,Cluster-31803.81673,Cluster-31803.86873,Cluster-31803.29590,Cluster-31803.95747,Cluster-31803.64612,Cluster-31803.30779,Cluster-31803.74871,Cluster-31803.85955…
GO:0016705	oxidoreductase activity, acting on paired donors, with incorporation or reduction of molecular oxygen	molecular_function	1	12	Cluster-31803.50040,Cluster-31803.69335,Cluster-31803.29666,Cluster-31803.48689,Cluster-31803.15683,Cluster-31803.63895,Cluster-31803.56122,Cluster-31803.96909,Cluster-31803.66090,Cluster-31803.91464,Cluster-31803.42103,Cluster-31803.72549
GO:0009378	four-way junction helicase activity	molecular_function	1	8	Cluster-31803.44374,Cluster-31803.30779,Cluster-31803.54524,Cluster-31803.38106,Cluster-31803.32685,Cluster-31803.101418,Cluster-31803.44422,Cluster-31803.42103
GO:0009379	Holliday junction helicase complex	cellular_component	1	8	Cluster-31803.101418,Cluster-31803.32685,Cluster-31803.38106,Cluster-31803.42103,Cluster-31803.44422,Cluster-31803.54524,Cluster-31803.30779,Cluster-31803.44374
GO:0048476	Holliday junction resolvase complex	cellular_component	1	8	Cluster-31803.30779,Cluster-31803.44374,Cluster-31803.42103,Cluster-31803.44422,Cluster-31803.101418,Cluster-31803.32685,Cluster-31803.38106,Cluster-31803.54524
GO:0010948	negative regulation of cell cycle process	biological_process	1	2	Cluster-31803.52096,Cluster-31803.23353
GO:0033865	nucleoside bisphosphate metabolic process	biological_process	1	2	Cluster-31803.107323,Cluster-31803.37116
GO:0033875	ribonucleoside bisphosphate metabolic process	biological_process	1	2	Cluster-31803.37116,Cluster-31803.107323
GO:0034032	purine nucleoside bisphosphate metabolic process	biological_process	1	2	Cluster-31803.37116,Cluster-31803.107323
GO:0050793	regulation of developmental process	biological_process	1	2	Cluster-31803.41951,Cluster-31803.92051
GO:0006997	nucleus organization	biological_process	1	1	Cluster-31803.93098
GO:0005578	proteinaceous extracellular matrix	cellular_component	1	3	Cluster-31803.31213,Cluster-31803.45966,Cluster-31803.11135
GO:0033177	proton-transporting two-sector ATPase complex, proton-transporting domain	cellular_component	1	4	Cluster-31803.68814,Cluster-31803.76092,Cluster-31803.70958,Cluster-31803.47890
GO:0042277	peptide binding	molecular_function	1	1	Cluster-31803.26254
GO:0005216	ion channel activity	molecular_function	1	18	Cluster-31803.18763,Cluster-31803.59364,Cluster-31803.65639,Cluster-31803.67849,Cluster-31803.49879,Cluster-31803.72117,Cluster-31803.54240,Cluster-31803.25822,Cluster-31803.58906,Cluster-31803.55037,Cluster-31803.54463,Cluster-31803.93098,Cluster-31803.25826,Cluster-31803.105554,Cluster-31803.54236,Cluster-31803.45483,Cluster-31803.35654,Cluster-31803.39101
GO:0022838	substrate-specific channel activity	molecular_function	1	18	Cluster-31803.93098,Cluster-31803.45483,Cluster-31803.35654,Cluster-31803.39101,Cluster-31803.54236,Cluster-31803.105554,Cluster-31803.25826,Cluster-31803.58906,Cluster-31803.54463,Cluster-31803.55037,Cluster-31803.54240,Cluster-31803.72117,Cluster-31803.49879,Cluster-31803.67849,Cluster-31803.25822,Cluster-31803.59364,Cluster-31803.18763,Cluster-31803.65639
GO:0000226	microtubule cytoskeleton organization	biological_process	1	5	Cluster-31803.73411,Cluster-31803.62576,Cluster-31803.71701,Cluster-31803.91237,Cluster-31803.41140
GO:0072330	monocarboxylic acid biosynthetic process	biological_process	1	11	Cluster-31803.42029,Cluster-31803.107323,Cluster-31803.21983,Cluster-31803.72549,Cluster-31803.54712,Cluster-31803.72329,Cluster-31803.54710,Cluster-31803.46795,Cluster-31803.37116,Cluster-31803.29666,Cluster-31803.52297
GO:0042651	thylakoid membrane	cellular_component	1	5	Cluster-31803.79185,Cluster-31803.63981,Cluster-31803.91237,Cluster-31803.47741,Cluster-31803.48726
GO:0003678	DNA helicase activity	molecular_function	1	12	Cluster-31803.54524,Cluster-31803.42103,Cluster-31803.44422,Cluster-31803.23170,Cluster-31803.101418,Cluster-31803.38106,Cluster-31803.32685,Cluster-31803.44374,Cluster-31803.97871,Cluster-31803.30779,Cluster-31803.60636,Cluster-31803.70281
GO:0007409	axonogenesis	biological_process	1	1	Cluster-31803.91716
GO:0007411	axon guidance	biological_process	1	1	Cluster-31803.91716
GO:0048667	cell morphogenesis involved in neuron differentiation	biological_process	1	1	Cluster-31803.91716
GO:0048812	neuron projection morphogenesis	biological_process	1	1	Cluster-31803.91716
GO:0061564	axon development	biological_process	1	1	Cluster-31803.91716
GO:0097485	neuron projection guidance	biological_process	1	1	Cluster-31803.91716
GO:0016999	antibiotic metabolic process	biological_process	1	1	Cluster-31803.21942
GO:0017000	antibiotic biosynthetic process	biological_process	1	1	Cluster-31803.21942
GO:0017144	drug metabolic process	biological_process	1	1	Cluster-31803.21942
GO:0033202	DNA helicase complex	cellular_component	1	8	Cluster-31803.30779,Cluster-31803.44374,Cluster-31803.42103,Cluster-31803.44422,Cluster-31803.101418,Cluster-31803.38106,Cluster-31803.32685,Cluster-31803.54524
GO:0006030	chitin metabolic process	biological_process	1	1	Cluster-31803.9120
GO:0048015	phosphatidylinositol-mediated signaling	biological_process	1	1	Cluster-31803.81410
GO:0048017	inositol lipid-mediated signaling	biological_process	1	1	Cluster-31803.81410
GO:0071702	organic substance transport	biological_process	1	58	Cluster-31803.24020,Cluster-31803.95022,Cluster-31803.86324,Cluster-31803.23749,Cluster-31803.74247,Cluster-31803.65414,Cluster-31803.23736,Cluster-31803.45214,Cluster-31803.10715,Cluster-31803.59364,Cluster-31803.32535,Cluster-31803.76092,Cluster-31803.86873,Cluster-31803.101418,Cluster-31803.26254,Cluster-31803.70952,Cluster-31803.8008,Cluster-31803.31653,Cluster-31803.70958,Cluster-31803.42009…
GO:0009059	macromolecule biosynthetic process	biological_process	1	170	Cluster-31803.55854,Cluster-31803.21799,Cluster-31803.9888,Cluster-31803.51447,Cluster-31803.75355,Cluster-31803.59364,Cluster-31803.62016,Cluster-31803.51240,Cluster-31803.81410,Cluster-31803.69518,Cluster-31803.101418,Cluster-31803.9120,Cluster-31803.31213,Cluster-31803.74549,Cluster-31803.97871,Cluster-31803.55475,Cluster-31803.26197,Cluster-31803.15518,Cluster-31803.45484,Cluster-31803.59911,…
GO:1901071	glucosamine-containing compound metabolic process	biological_process	1	1	Cluster-31803.9120
GO:0044257	cellular protein catabolic process	biological_process	1	9	Cluster-31803.63296,Cluster-31803.45750,Cluster-31803.90956,Cluster-31803.52096,Cluster-31803.23353,Cluster-31803.28798,Cluster-31803.54463,Cluster-31803.76844,Cluster-31803.95113
GO:0051603	proteolysis involved in cellular protein catabolic process	biological_process	1	9	Cluster-31803.76844,Cluster-31803.95113,Cluster-31803.28798,Cluster-31803.54463,Cluster-31803.23353,Cluster-31803.63296,Cluster-31803.45750,Cluster-31803.90956,Cluster-31803.52096
GO:0006566	threonine metabolic process	biological_process	1	3	Cluster-31803.86747,Cluster-31803.84665,Cluster-31803.84659
GO:0031324	negative regulation of cellular metabolic process	biological_process	1	5	Cluster-31803.23353,Cluster-31803.90853,Cluster-31803.94002,Cluster-31803.52096,Cluster-31803.101311
GO:0006413	translational initiation	biological_process	1	6	Cluster-31803.58375,Cluster-31803.21566,Cluster-31803.54317,Cluster-31803.18957,Cluster-31803.45483,Cluster-31803.62016
GO:0043623	cellular protein complex assembly	biological_process	1	11	Cluster-31803.24020,Cluster-31803.10715,Cluster-31803.55475,Cluster-31803.42009,Cluster-31803.52096,Cluster-31803.102830,Cluster-31803.45024,Cluster-31803.47177,Cluster-31803.79185,Cluster-31803.61089,Cluster-31803.54463
GO:0015103	inorganic anion transmembrane transporter activity	molecular_function	1	4	Cluster-31803.58329,Cluster-31803.43490,Cluster-31803.29237,Cluster-31803.69139
GO:0042475	odontogenesis of dentin-containing tooth	biological_process	1	1	Cluster-31803.41951
GO:0042476	odontogenesis	biological_process	1	1	Cluster-31803.41951
GO:0007006	mitochondrial membrane organization	biological_process	1	1	Cluster-31803.74308
GO:0043604	amide biosynthetic process	biological_process	1	45	Cluster-31803.60760,Cluster-31803.77209,Cluster-31803.41140,Cluster-31803.45483,Cluster-31803.28776,Cluster-31803.54317,Cluster-31803.46795,Cluster-31803.71782,Cluster-31803.52171,Cluster-31803.75298,Cluster-31803.54712,Cluster-31803.75438,Cluster-31803.21566,Cluster-31803.37116,Cluster-31803.71701,Cluster-31803.51122,Cluster-31803.51447,Cluster-31803.82464,Cluster-31803.95747,Cluster-31803.10732…
GO:0031981	nuclear lumen	cellular_component	1	51	Cluster-31803.94002,Cluster-31803.26998,Cluster-31803.69982,Cluster-31803.101311,Cluster-31803.69296,Cluster-31803.52096,Cluster-31803.27182,Cluster-31803.83180,Cluster-31803.7700,Cluster-31803.93098,Cluster-31803.36923,Cluster-31803.90956,Cluster-31803.94898,Cluster-31803.56122,Cluster-31803.106118,Cluster-31803.42029,Cluster-31803.65936,Cluster-31803.78451,Cluster-31803.77933,Cluster-31803.3810…
GO:0030163	protein catabolic process	biological_process	1	10	Cluster-31803.23353,Cluster-31803.45750,Cluster-31803.63296,Cluster-31803.52096,Cluster-31803.74328,Cluster-31803.90956,Cluster-31803.76844,Cluster-31803.95113,Cluster-31803.28798,Cluster-31803.54463
GO:0051252	regulation of RNA metabolic process	biological_process	1	86	Cluster-31803.59478,Cluster-31803.32161,Cluster-31803.103557,Cluster-31803.55874,Cluster-31803.39801,Cluster-31803.44221,Cluster-31803.32222,Cluster-31803.6639,Cluster-31803.42029,Cluster-31803.48754,Cluster-31803.106118,Cluster-31803.73411,Cluster-31803.38042,Cluster-31803.27077,Cluster-31803.52989,Cluster-31803.101311,Cluster-31803.55406,Cluster-31803.42524,Cluster-31803.90853,Cluster-31803.444…
GO:0032268	regulation of cellular protein metabolic process	biological_process	1	14	Cluster-31803.52096,Cluster-31803.45483,Cluster-31803.23353,Cluster-31803.18957,Cluster-31803.21566,Cluster-31803.40334,Cluster-31803.53273,Cluster-31803.75298,Cluster-31803.62016,Cluster-31803.106118,Cluster-31803.58375,Cluster-31803.95747,Cluster-31803.54317,Cluster-31803.42340
GO:1901137	carbohydrate derivative biosynthetic process	biological_process	1	20	Cluster-31803.102530,Cluster-31803.101505,Cluster-31803.48689,Cluster-31803.37116,Cluster-31803.47890,Cluster-31803.76092,Cluster-31803.21942,Cluster-31803.107323,Cluster-31803.69518,Cluster-31803.47008,Cluster-31803.9120,Cluster-31803.77209,Cluster-31803.54211,Cluster-31803.70958,Cluster-31803.104362,Cluster-31803.64563,Cluster-31803.38042,Cluster-31803.99504,Cluster-31803.25539,Cluster-31803.71…
GO:0031175	neuron projection development	biological_process	1	1	Cluster-31803.91716
GO:0048666	neuron development	biological_process	1	1	Cluster-31803.91716
GO:0022890	inorganic cation transmembrane transporter activity	molecular_function	1	38	Cluster-31803.35654,Cluster-31803.72674,Cluster-31803.39821,Cluster-31803.93098,Cluster-31803.68814,Cluster-31803.62748,Cluster-31803.54463,Cluster-31803.55037,Cluster-31803.58906,Cluster-31803.44058,Cluster-31803.14245,Cluster-31803.47890,Cluster-31803.62576,Cluster-31803.49879,Cluster-31803.107832,Cluster-31803.29054,Cluster-31803.42219,Cluster-31803.69005,Cluster-31803.41140,Cluster-31803.7095…
GO:0010033	response to organic substance	biological_process	1	3	Cluster-31803.38855,Cluster-31803.29590,Cluster-31803.51447
GO:0009887	organ morphogenesis	biological_process	1	1	Cluster-31803.41951
GO:0051205	protein insertion into membrane	biological_process	1	1	Cluster-31803.74308
GO:0015947	methane metabolic process	biological_process	1	2	Cluster-31803.64574,Cluster-31803.45694
GO:0043446	cellular alkane metabolic process	biological_process	1	2	Cluster-31803.45694,Cluster-31803.64574
GO:0016052	carbohydrate catabolic process	biological_process	1	6	Cluster-31803.40957,Cluster-31803.44058,Cluster-31803.57530,Cluster-31803.77576,Cluster-31803.59602,Cluster-31803.21942
GO:0009636	response to toxic substance	biological_process	1	2	Cluster-31803.61344,Cluster-31803.48726
GO:0009144	purine nucleoside triphosphate metabolic process	biological_process	1	19	Cluster-31803.47890,Cluster-31803.40957,Cluster-31803.59602,Cluster-31803.47008,Cluster-31803.42219,Cluster-31803.21942,Cluster-31803.77576,Cluster-31803.57662,Cluster-31803.76092,Cluster-31803.70958,Cluster-31803.55475,Cluster-31803.77209,Cluster-31803.72674,Cluster-31803.39821,Cluster-31803.62748,Cluster-31803.48966,Cluster-31803.57530,Cluster-31803.74400,Cluster-31803.44058
GO:0009205	purine ribonucleoside triphosphate metabolic process	biological_process	1	19	Cluster-31803.48966,Cluster-31803.62748,Cluster-31803.57530,Cluster-31803.74400,Cluster-31803.44058,Cluster-31803.55475,Cluster-31803.77209,Cluster-31803.72674,Cluster-31803.70958,Cluster-31803.39821,Cluster-31803.42219,Cluster-31803.47008,Cluster-31803.77576,Cluster-31803.76092,Cluster-31803.57662,Cluster-31803.21942,Cluster-31803.47890,Cluster-31803.40957,Cluster-31803.59602
GO:0008094	DNA-dependent ATPase activity	molecular_function	1	3	Cluster-31803.38106,Cluster-31803.60636,Cluster-31803.65426
GO:0080090	regulation of primary metabolic process	biological_process	1	97	Cluster-31803.26272,Cluster-31803.25899,Cluster-31803.86873,Cluster-31803.81673,Cluster-31803.40334,Cluster-31803.95747,Cluster-31803.85714,Cluster-31803.21566,Cluster-31803.23170,Cluster-31803.67069,Cluster-31803.75298,Cluster-31803.72458,Cluster-31803.57530,Cluster-31803.30779,Cluster-31803.31653,Cluster-31803.85955,Cluster-31803.74871,Cluster-31803.53273,Cluster-31803.74308,Cluster-31803.61344…
GO:0008324	cation transmembrane transporter activity	molecular_function	1	41	Cluster-31803.39821,Cluster-31803.93098,Cluster-31803.68814,Cluster-31803.35654,Cluster-31803.72674,Cluster-31803.58906,Cluster-31803.44058,Cluster-31803.36429,Cluster-31803.62748,Cluster-31803.54463,Cluster-31803.55037,Cluster-31803.49879,Cluster-31803.14245,Cluster-31803.47890,Cluster-31803.62576,Cluster-31803.92232,Cluster-31803.69005,Cluster-31803.107832,Cluster-31803.42219,Cluster-31803.2905…
GO:0052855	ADP-dependent NAD(P)H-hydrate dehydratase activity	molecular_function	1	1	Cluster-31803.33273
GO:0046983	protein dimerization activity	molecular_function	1	10	Cluster-31803.47890,Cluster-31803.52989,Cluster-31803.32161,Cluster-31803.64155,Cluster-31803.23749,Cluster-31803.6659,Cluster-31803.91237,Cluster-31803.48754,Cluster-31803.57544,Cluster-31803.39015
GO:0007268	synaptic transmission	biological_process	1	3	Cluster-31803.55037,Cluster-31803.105554,Cluster-31803.58906
GO:0065007	biological regulation	biological_process	1	185	Cluster-31803.43520,Cluster-31803.45483,Cluster-31803.47741,Cluster-31803.42009,Cluster-31803.59210,Cluster-31803.95433,Cluster-31803.44038,Cluster-31803.46681,Cluster-31803.33578,Cluster-31803.36206,Cluster-31803.54317,Cluster-31803.63151,Cluster-31803.23780,Cluster-31803.79266,Cluster-31803.33359,Cluster-31803.62104,Cluster-31803.67031,Cluster-31803.23749,Cluster-31803.46675,Cluster-31803.75438…
GO:0009654	photosystem II oxygen evolving complex	cellular_component	1	4	Cluster-31803.63981,Cluster-31803.48726,Cluster-31803.91237,Cluster-31803.47741
GO:0045087	innate immune response	biological_process	1	1	Cluster-31803.27182
GO:0007267	cell-cell signaling	biological_process	1	3	Cluster-31803.58906,Cluster-31803.105554,Cluster-31803.55037
GO:0016813	hydrolase activity, acting on carbon-nitrogen (but not peptide) bonds, in linear amidines	molecular_function	1	1	Cluster-31803.42340
GO:0006879	cellular iron ion homeostasis	biological_process	1	1	Cluster-31803.72549
GO:0055072	iron ion homeostasis	biological_process	1	1	Cluster-31803.72549
GO:0046165	alcohol biosynthetic process	biological_process	1	1	Cluster-31803.21942
GO:0006690	icosanoid metabolic process	biological_process	1	1	Cluster-31803.26272
GO:0006691	leukotriene metabolic process	biological_process	1	1	Cluster-31803.26272
GO:0033559	unsaturated fatty acid metabolic process	biological_process	1	1	Cluster-31803.26272
GO:1901568	fatty acid derivative metabolic process	biological_process	1	1	Cluster-31803.26272
GO:0016747	transferase activity, transferring acyl groups other than amino-acyl groups	molecular_function	1	13	Cluster-31803.36923,Cluster-31803.70735,Cluster-31803.43254,Cluster-31803.9888,Cluster-31803.64895,Cluster-31803.46767,Cluster-31803.57662,Cluster-31803.61344,Cluster-31803.21983,Cluster-31803.90919,Cluster-31803.69742,Cluster-31803.38855,Cluster-31803.85878
GO:0005779	integral component of peroxisomal membrane	cellular_component	1	1	Cluster-31803.33595
GO:0031231	intrinsic component of peroxisomal membrane	cellular_component	1	1	Cluster-31803.33595
GO:0005730	nucleolus	cellular_component	1	10	Cluster-31803.46305,Cluster-31803.25438,Cluster-31803.36923,Cluster-31803.26254,Cluster-31803.93098,Cluster-31803.51719,Cluster-31803.46767,Cluster-31803.94898,Cluster-31803.46681,Cluster-31803.59911
GO:0051348	negative regulation of transferase activity	biological_process	1	2	Cluster-31803.23353,Cluster-31803.52096
GO:0009058	biosynthetic process	biological_process	1	236	Cluster-31803.62383,Cluster-31803.100020,Cluster-31803.42361,Cluster-31803.59478,Cluster-31803.55874,Cluster-31803.62866,Cluster-31803.25539,Cluster-31803.38042,Cluster-31803.72329,Cluster-31803.83172,Cluster-31803.6639,Cluster-31803.40352,Cluster-31803.42524,Cluster-31803.55406,Cluster-31803.48689,Cluster-31803.90853,Cluster-31803.101505,Cluster-31803.69296,Cluster-31803.62576,Cluster-31803.1013…
GO:0031400	negative regulation of protein modification process	biological_process	1	2	Cluster-31803.52096,Cluster-31803.23353
GO:0004673	protein histidine kinase activity	molecular_function	1	4	Cluster-31803.13827,Cluster-31803.93526,Cluster-31803.23749,Cluster-31803.69139
GO:0009365	protein histidine kinase complex	cellular_component	1	4	Cluster-31803.93526,Cluster-31803.23749,Cluster-31803.69139,Cluster-31803.13827
GO:0016775	phosphotransferase activity, nitrogenous group as acceptor	molecular_function	1	4	Cluster-31803.13827,Cluster-31803.69139,Cluster-31803.23749,Cluster-31803.93526
GO:0019773	proteasome core complex, alpha-subunit complex	cellular_component	1	1	Cluster-31803.45750
GO:0005666	DNA-directed RNA polymerase III complex	cellular_component	1	1	Cluster-31803.93098
GO:0055085	transmembrane transport	biological_process	1	46	Cluster-31803.100458,Cluster-31803.44112,Cluster-31803.42838,Cluster-31803.101820,Cluster-31803.76092,Cluster-31803.23780,Cluster-31803.21799,Cluster-31803.72117,Cluster-31803.13295,Cluster-31803.35624,Cluster-31803.75438,Cluster-31803.62959,Cluster-31803.74434,Cluster-31803.96276,Cluster-31803.70958,Cluster-31803.10410,Cluster-31803.58015,Cluster-31803.27706,Cluster-31803.13432,Cluster-31803.300…
GO:0004721	phosphoprotein phosphatase activity	molecular_function	1	4	Cluster-31803.100522,Cluster-31803.24311,Cluster-31803.45055,Cluster-31803.75133
GO:0051246	regulation of protein metabolic process	biological_process	1	14	Cluster-31803.52096,Cluster-31803.45483,Cluster-31803.21566,Cluster-31803.18957,Cluster-31803.23353,Cluster-31803.75298,Cluster-31803.62016,Cluster-31803.40334,Cluster-31803.53273,Cluster-31803.42340,Cluster-31803.54317,Cluster-31803.106118,Cluster-31803.95747,Cluster-31803.58375
GO:0009219	pyrimidine deoxyribonucleotide metabolic process	biological_process	1	1	Cluster-31803.71782
GO:0034450	ubiquitin-ubiquitin ligase activity	molecular_function	1	1	Cluster-31803.63296
GO:0015833	peptide transport	biological_process	1	1	Cluster-31803.13827
GO:0005746	mitochondrial respiratory chain	cellular_component	1	2	Cluster-31803.48966,Cluster-31803.72674
GO:0019219	regulation of nucleobase-containing compound metabolic process	biological_process	1	86	Cluster-31803.59364,Cluster-31803.78456,Cluster-31803.62795,Cluster-31803.62016,Cluster-31803.56684,Cluster-31803.81410,Cluster-31803.45854,Cluster-31803.51240,Cluster-31803.65639,Cluster-31803.101418,Cluster-31803.69518,Cluster-31803.75438,Cluster-31803.46675,Cluster-31803.55854,Cluster-31803.21799,Cluster-31803.33359,Cluster-31803.15518,Cluster-31803.45484,Cluster-31803.36206,Cluster-31803.3357…
GO:0016137	glycoside metabolic process	biological_process	1	1	Cluster-31803.21942
GO:0016138	glycoside biosynthetic process	biological_process	1	1	Cluster-31803.21942
GO:0031974	membrane-enclosed lumen	cellular_component	1	53	Cluster-31803.36206,Cluster-31803.57530,Cluster-31803.46767,Cluster-31803.15518,Cluster-31803.62959,Cluster-31803.64597,Cluster-31803.59911,Cluster-31803.46681,Cluster-31803.26254,Cluster-31803.97871,Cluster-31803.74549,Cluster-31803.85955,Cluster-31803.46305,Cluster-31803.45483,Cluster-31803.64605,Cluster-31803.78456,Cluster-31803.64612,Cluster-31803.15368,Cluster-31803.46340,Cluster-31803.69518…
GO:0005778	peroxisomal membrane	cellular_component	1	1	Cluster-31803.33595
GO:0031903	microbody membrane	cellular_component	1	1	Cluster-31803.33595
GO:0044438	microbody part	cellular_component	1	1	Cluster-31803.33595
GO:0044439	peroxisomal part	cellular_component	1	1	Cluster-31803.33595
GO:0009394	2'-deoxyribonucleotide metabolic process	biological_process	1	1	Cluster-31803.71782
GO:0019692	deoxyribose phosphate metabolic process	biological_process	1	1	Cluster-31803.71782
GO:0008641	small protein activating enzyme activity	molecular_function	1	2	Cluster-31803.35115,Cluster-31803.41549
GO:0044249	cellular biosynthetic process	biological_process	1	221	Cluster-31803.78451,Cluster-31803.96355,Cluster-31803.38855,Cluster-31803.45498,Cluster-31803.21983,Cluster-31803.38106,Cluster-31803.56122,Cluster-31803.99504,Cluster-31803.37899,Cluster-31803.9569,Cluster-31803.104362,Cluster-31803.64563,Cluster-31803.71617,Cluster-31803.84659,Cluster-31803.15979,Cluster-31803.31214,Cluster-31803.69742,Cluster-31803.86310,Cluster-31803.69005,Cluster-31803.47177…
GO:0004045	aminoacyl-tRNA hydrolase activity	molecular_function	1	1	Cluster-31803.75133
GO:0044444	cytoplasmic part	cellular_component	1	89	Cluster-31803.77209,Cluster-31803.55475,Cluster-31803.45483,Cluster-31803.70958,Cluster-31803.30686,Cluster-31803.54317,Cluster-31803.33595,Cluster-31803.18502,Cluster-31803.54240,Cluster-31803.45214,Cluster-31803.23736,Cluster-31803.33376,Cluster-31803.51447,Cluster-31803.63151,Cluster-31803.57662,Cluster-31803.51240,Cluster-31803.62016,Cluster-31803.100697,Cluster-31803.68814,Cluster-31803.3108…
GO:0016832	aldehyde-lyase activity	molecular_function	1	1	Cluster-31803.77576
GO:0019953	sexual reproduction	biological_process	1	11	Cluster-31803.54463,Cluster-31803.15545,Cluster-31803.46795,Cluster-31803.83110,Cluster-31803.68598,Cluster-31803.84160,Cluster-31803.54211,Cluster-31803.92817,Cluster-31803.49879,Cluster-31803.45632,Cluster-31803.61564
GO:0098742	cell-cell adhesion via plasma-membrane adhesion molecules	biological_process	1	1	Cluster-31803.59478
GO:2000112	regulation of cellular macromolecule biosynthetic process	biological_process	1	88	Cluster-31803.52096,Cluster-31803.25822,Cluster-31803.55859,Cluster-31803.54117,Cluster-31803.18957,Cluster-31803.94002,Cluster-31803.61344,Cluster-31803.53273,Cluster-31803.85230,Cluster-31803.31214,Cluster-31803.58375,Cluster-31803.54524,Cluster-31803.47177,Cluster-31803.48694,Cluster-31803.9569,Cluster-31803.25826,Cluster-31803.44374,Cluster-31803.60827,Cluster-31803.71617,Cluster-31803.61089,…
GO:0055036	virion membrane	cellular_component	1	1	Cluster-31803.7833
GO:0052126	movement in host environment	biological_process	1	2	Cluster-31803.86324,Cluster-31803.6659
GO:0052192	movement in environment of other organism involved in symbiotic interaction	biological_process	1	2	Cluster-31803.86324,Cluster-31803.6659
GO:0006470	protein dephosphorylation	biological_process	1	4	Cluster-31803.75133,Cluster-31803.45055,Cluster-31803.24311,Cluster-31803.100522
GO:0010556	regulation of macromolecule biosynthetic process	biological_process	1	88	Cluster-31803.60827,Cluster-31803.44374,Cluster-31803.71617,Cluster-31803.9569,Cluster-31803.25826,Cluster-31803.61089,Cluster-31803.77933,Cluster-31803.78451,Cluster-31803.54117,Cluster-31803.18957,Cluster-31803.94002,Cluster-31803.25822,Cluster-31803.52096,Cluster-31803.55859,Cluster-31803.58375,Cluster-31803.54524,Cluster-31803.47177,Cluster-31803.48694,Cluster-31803.61344,Cluster-31803.53273,…
GO:0031326	regulation of cellular biosynthetic process	biological_process	1	88	Cluster-31803.6639,Cluster-31803.42029,Cluster-31803.48754,Cluster-31803.73411,Cluster-31803.106118,Cluster-31803.38042,Cluster-31803.27077,Cluster-31803.59478,Cluster-31803.32161,Cluster-31803.103557,Cluster-31803.55874,Cluster-31803.39801,Cluster-31803.44221,Cluster-31803.44422,Cluster-31803.39186,Cluster-31803.42340,Cluster-31803.52989,Cluster-31803.101311,Cluster-31803.55406,Cluster-31803.425…
GO:0051130	positive regulation of cellular component organization	biological_process	1	2	Cluster-31803.15545,Cluster-31803.38204
GO:0016651	oxidoreductase activity, acting on NAD(P)H	molecular_function	1	4	Cluster-31803.76193,Cluster-31803.53485,Cluster-31803.55475,Cluster-31803.48726
GO:0019941	modification-dependent protein catabolic process	biological_process	1	8	Cluster-31803.23353,Cluster-31803.63296,Cluster-31803.45750,Cluster-31803.90956,Cluster-31803.52096,Cluster-31803.76844,Cluster-31803.28798,Cluster-31803.54463
GO:0043632	modification-dependent macromolecule catabolic process	biological_process	1	8	Cluster-31803.54463,Cluster-31803.28798,Cluster-31803.76844,Cluster-31803.90956,Cluster-31803.52096,Cluster-31803.63296,Cluster-31803.45750,Cluster-31803.23353
GO:0051782	negative regulation of cell division	biological_process	1	2	Cluster-31803.23353,Cluster-31803.52096
GO:0008378	galactosyltransferase activity	molecular_function	1	1	Cluster-31803.64563
GO:0009199	ribonucleoside triphosphate metabolic process	biological_process	1	19	Cluster-31803.48966,Cluster-31803.62748,Cluster-31803.44058,Cluster-31803.57530,Cluster-31803.74400,Cluster-31803.72674,Cluster-31803.77209,Cluster-31803.55475,Cluster-31803.70958,Cluster-31803.39821,Cluster-31803.42219,Cluster-31803.47008,Cluster-31803.76092,Cluster-31803.57662,Cluster-31803.77576,Cluster-31803.21942,Cluster-31803.40957,Cluster-31803.47890,Cluster-31803.59602
GO:0009889	regulation of biosynthetic process	biological_process	1	88	Cluster-31803.78451,Cluster-31803.77933,Cluster-31803.61089,Cluster-31803.25826,Cluster-31803.9569,Cluster-31803.71617,Cluster-31803.44374,Cluster-31803.60827,Cluster-31803.31214,Cluster-31803.85230,Cluster-31803.53273,Cluster-31803.61344,Cluster-31803.48694,Cluster-31803.47177,Cluster-31803.54524,Cluster-31803.58375,Cluster-31803.55859,Cluster-31803.25822,Cluster-31803.52096,Cluster-31803.94002,…
GO:0050830	defense response to Gram-positive bacterium	biological_process	1	1	Cluster-31803.69742
GO:0004177	aminopeptidase activity	molecular_function	1	3	Cluster-31803.77576,Cluster-31803.45498,Cluster-31803.91237
GO:0010506	regulation of autophagy	biological_process	1	4	Cluster-31803.91237,Cluster-31803.52989,Cluster-31803.32161,Cluster-31803.48754
GO:0019899	enzyme binding	molecular_function	1	5	Cluster-31803.78065,Cluster-31803.91237,Cluster-31803.6639,Cluster-31803.106118,Cluster-31803.59364
GO:0098609	cell-cell adhesion	biological_process	1	1	Cluster-31803.59478
GO:0018342	protein prenylation	biological_process	1	1	Cluster-31803.64895
GO:0097354	prenylation	biological_process	1	1	Cluster-31803.64895
GO:0033013	tetrapyrrole metabolic process	biological_process	1	13	Cluster-31803.15518,Cluster-31803.76092,Cluster-31803.77576,Cluster-31803.45498,Cluster-31803.24959,Cluster-31803.38855,Cluster-31803.98485,Cluster-31803.30091,Cluster-31803.6659,Cluster-31803.26998,Cluster-31803.4794,Cluster-31803.70958,Cluster-31803.33376
GO:0042623	ATPase activity, coupled	molecular_function	1	13	Cluster-31803.65426,Cluster-31803.19074,Cluster-31803.76770,Cluster-31803.60636,Cluster-31803.53879,Cluster-31803.47799,Cluster-31803.19072,Cluster-31803.44112,Cluster-31803.38106,Cluster-31803.35937,Cluster-31803.54463,Cluster-31803.15588,Cluster-31803.105483
GO:0008318	protein prenyltransferase activity	molecular_function	1	1	Cluster-31803.64895
GO:0034062	RNA polymerase activity	molecular_function	1	11	Cluster-31803.25438,Cluster-31803.46305,Cluster-31803.93098,Cluster-31803.45055,Cluster-31803.36923,Cluster-31803.51719,Cluster-31803.46767,Cluster-31803.94898,Cluster-31803.100458,Cluster-31803.46681,Cluster-31803.59911
GO:0019050	suppression by virus of host apoptotic process	biological_process	1	1	Cluster-31803.69296
GO:0033668	negative regulation by symbiont of host apoptotic process	biological_process	1	1	Cluster-31803.69296
GO:0052041	negative regulation by symbiont of host programmed cell death	biological_process	1	1	Cluster-31803.69296
GO:0052490	negative regulation by organism of programmed cell death in other organism involved in symbiotic interaction	biological_process	1	1	Cluster-31803.69296
GO:0006468	protein phosphorylation	biological_process	1	36	Cluster-31803.87059,Cluster-31803.44038,Cluster-31803.9845,Cluster-31803.46305,Cluster-31803.97871,Cluster-31803.45694,Cluster-31803.42103,Cluster-31803.65725,Cluster-31803.40265,Cluster-31803.10715,Cluster-31803.79266,Cluster-31803.66155,Cluster-31803.95022,Cluster-31803.26007,Cluster-31803.24020,Cluster-31803.54463,Cluster-31803.47594,Cluster-31803.102830,Cluster-31803.58061,Cluster-31803.18133…
GO:0044703	multi-organism reproductive process	biological_process	1	11	Cluster-31803.49879,Cluster-31803.45632,Cluster-31803.61564,Cluster-31803.92817,Cluster-31803.54211,Cluster-31803.84160,Cluster-31803.68598,Cluster-31803.83110,Cluster-31803.15545,Cluster-31803.46795,Cluster-31803.54463
GO:0098791	Golgi subcompartment	cellular_component	1	1	Cluster-31803.104362
GO:0039526	modulation by virus of host apoptotic process	biological_process	1	1	Cluster-31803.69296
GO:0044531	modulation of programmed cell death in other organism	biological_process	1	1	Cluster-31803.69296
GO:0044532	modulation of apoptotic process in other organism	biological_process	1	1	Cluster-31803.69296
GO:0052040	modulation by symbiont of host programmed cell death	biological_process	1	1	Cluster-31803.69296
GO:0052150	modulation by symbiont of host apoptotic process	biological_process	1	1	Cluster-31803.69296
GO:0052248	modulation of programmed cell death in other organism involved in symbiotic interaction	biological_process	1	1	Cluster-31803.69296
GO:0052433	modulation by organism of apoptotic process in other organism involved in symbiotic interaction	biological_process	1	1	Cluster-31803.69296
GO:0006913	nucleocytoplasmic transport	biological_process	1	5	Cluster-31803.48798,Cluster-31803.45214,Cluster-31803.86873,Cluster-31803.47890,Cluster-31803.93098
GO:0051094	positive regulation of developmental process	biological_process	1	1	Cluster-31803.41951
GO:0009141	nucleoside triphosphate metabolic process	biological_process	1	19	Cluster-31803.57662,Cluster-31803.76092,Cluster-31803.77576,Cluster-31803.21942,Cluster-31803.42219,Cluster-31803.47008,Cluster-31803.59602,Cluster-31803.40957,Cluster-31803.47890,Cluster-31803.44058,Cluster-31803.57530,Cluster-31803.74400,Cluster-31803.48966,Cluster-31803.62748,Cluster-31803.39821,Cluster-31803.77209,Cluster-31803.72674,Cluster-31803.55475,Cluster-31803.70958
GO:0009968	negative regulation of signal transduction	biological_process	1	2	Cluster-31803.52988,Cluster-31803.70281
GO:0015267	channel activity	molecular_function	1	18	Cluster-31803.105554,Cluster-31803.54236,Cluster-31803.25826,Cluster-31803.45483,Cluster-31803.39101,Cluster-31803.35654,Cluster-31803.93098,Cluster-31803.55037,Cluster-31803.54463,Cluster-31803.58906,Cluster-31803.25822,Cluster-31803.49879,Cluster-31803.72117,Cluster-31803.67849,Cluster-31803.54240,Cluster-31803.65639,Cluster-31803.18763,Cluster-31803.59364
GO:0022803	passive transmembrane transporter activity	molecular_function	1	18	Cluster-31803.25822,Cluster-31803.54240,Cluster-31803.67849,Cluster-31803.49879,Cluster-31803.72117,Cluster-31803.65639,Cluster-31803.59364,Cluster-31803.18763,Cluster-31803.39101,Cluster-31803.45483,Cluster-31803.35654,Cluster-31803.25826,Cluster-31803.54236,Cluster-31803.105554,Cluster-31803.93098,Cluster-31803.54463,Cluster-31803.55037,Cluster-31803.58906
GO:0010639	negative regulation of organelle organization	biological_process	1	2	Cluster-31803.23353,Cluster-31803.52096
GO:0006461	protein complex assembly	biological_process	1	16	Cluster-31803.24020,Cluster-31803.47890,Cluster-31803.52096,Cluster-31803.10715,Cluster-31803.79185,Cluster-31803.45024,Cluster-31803.47177,Cluster-31803.22459,Cluster-31803.42009,Cluster-31803.55475,Cluster-31803.12153,Cluster-31803.19238,Cluster-31803.102830,Cluster-31803.54463,Cluster-31803.61089,Cluster-31803.91237
GO:0010648	negative regulation of cell communication	biological_process	1	2	Cluster-31803.70281,Cluster-31803.52988
GO:0023057	negative regulation of signaling	biological_process	1	2	Cluster-31803.52988,Cluster-31803.70281
GO:0006412	translation	biological_process	1	34	Cluster-31803.62576,Cluster-31803.18957,Cluster-31803.96761,Cluster-31803.40352,Cluster-31803.108977,Cluster-31803.79832,Cluster-31803.53273,Cluster-31803.42340,Cluster-31803.86310,Cluster-31803.82992,Cluster-31803.13126,Cluster-31803.58375,Cluster-31803.84659,Cluster-31803.65936,Cluster-31803.96355,Cluster-31803.83172,Cluster-31803.71701,Cluster-31803.51447,Cluster-31803.82464,Cluster-31803.5112…
GO:0070069	cytochrome complex	cellular_component	1	4	Cluster-31803.79185,Cluster-31803.57662,Cluster-31803.72674,Cluster-31803.48966
GO:0004511	tyrosine 3-monooxygenase activity	molecular_function	1	1	Cluster-31803.42103
GO:0046660	female sex differentiation	biological_process	1	1	Cluster-31803.62748
GO:0006820	anion transport	biological_process	1	12	Cluster-31803.58329,Cluster-31803.101418,Cluster-31803.42913,Cluster-31803.59214,Cluster-31803.76092,Cluster-31803.59222,Cluster-31803.43490,Cluster-31803.70958,Cluster-31803.29237,Cluster-31803.70952,Cluster-31803.69139,Cluster-31803.56331
GO:0033643	host cell part	cellular_component	1	9	Cluster-31803.73411,Cluster-31803.91219,Cluster-31803.61089,Cluster-31803.100697,Cluster-31803.41973,Cluster-31803.42361,Cluster-31803.60827,Cluster-31803.105902,Cluster-31803.42009
GO:0006270	DNA replication initiation	biological_process	1	6	Cluster-31803.75518,Cluster-31803.58994,Cluster-31803.55859,Cluster-31803.27182,Cluster-31803.62866,Cluster-31803.55854
GO:0009132	nucleoside diphosphate metabolic process	biological_process	1	6	Cluster-31803.40957,Cluster-31803.57530,Cluster-31803.77576,Cluster-31803.44058,Cluster-31803.21942,Cluster-31803.59602
GO:0005840	ribosome	cellular_component	1	27	Cluster-31803.58375,Cluster-31803.13126,Cluster-31803.42340,Cluster-31803.82992,Cluster-31803.53273,Cluster-31803.74993,Cluster-31803.40334,Cluster-31803.79832,Cluster-31803.62016,Cluster-31803.29590,Cluster-31803.108977,Cluster-31803.40352,Cluster-31803.42524,Cluster-31803.96761,Cluster-31803.18957,Cluster-31803.21566,Cluster-31803.82464,Cluster-31803.51447,Cluster-31803.62576,Cluster-31803.7170…
GO:0031984	organelle subcompartment	cellular_component	1	1	Cluster-31803.104362
GO:0004672	protein kinase activity	molecular_function	1	41	Cluster-31803.87059,Cluster-31803.13827,Cluster-31803.9845,Cluster-31803.44038,Cluster-31803.93526,Cluster-31803.46305,Cluster-31803.97871,Cluster-31803.45694,Cluster-31803.42103,Cluster-31803.65725,Cluster-31803.79266,Cluster-31803.40265,Cluster-31803.10715,Cluster-31803.53393,Cluster-31803.66155,Cluster-31803.95022,Cluster-31803.23749,Cluster-31803.24020,Cluster-31803.26007,Cluster-31803.47594,…
GO:0006814	sodium ion transport	biological_process	1	6	Cluster-31803.23780,Cluster-31803.55037,Cluster-31803.55475,Cluster-31803.27706,Cluster-31803.58906,Cluster-31803.16576
GO:0004866	endopeptidase inhibitor activity	molecular_function	1	4	Cluster-31803.55243,Cluster-31803.20011,Cluster-31803.60007,Cluster-31803.61564
GO:0061135	endopeptidase regulator activity	molecular_function	1	4	Cluster-31803.61564,Cluster-31803.60007,Cluster-31803.20011,Cluster-31803.55243
GO:0006518	peptide metabolic process	biological_process	1	38	Cluster-31803.84659,Cluster-31803.96355,Cluster-31803.65936,Cluster-31803.83172,Cluster-31803.44058,Cluster-31803.62576,Cluster-31803.108977,Cluster-31803.40352,Cluster-31803.46994,Cluster-31803.18957,Cluster-31803.96761,Cluster-31803.53273,Cluster-31803.15979,Cluster-31803.79832,Cluster-31803.58375,Cluster-31803.13126,Cluster-31803.86310,Cluster-31803.42340,Cluster-31803.82992,Cluster-31803.4114…
GO:0006550	isoleucine catabolic process	biological_process	1	5	Cluster-31803.54710,Cluster-31803.46795,Cluster-31803.52297,Cluster-31803.72549,Cluster-31803.54712
GO:0006552	leucine catabolic process	biological_process	1	5	Cluster-31803.54710,Cluster-31803.52297,Cluster-31803.46795,Cluster-31803.72549,Cluster-31803.54712
GO:0006574	valine catabolic process	biological_process	1	5	Cluster-31803.72549,Cluster-31803.54712,Cluster-31803.54710,Cluster-31803.52297,Cluster-31803.46795
GO:0009083	branched-chain amino acid catabolic process	biological_process	1	5	Cluster-31803.54712,Cluster-31803.72549,Cluster-31803.54710,Cluster-31803.46795,Cluster-31803.52297
GO:0030182	neuron differentiation	biological_process	1	1	Cluster-31803.91716
GO:0048699	generation of neurons	biological_process	1	1	Cluster-31803.91716
GO:0031323	regulation of cellular metabolic process	biological_process	1	98	Cluster-31803.21799,Cluster-31803.55854,Cluster-31803.33359,Cluster-31803.75438,Cluster-31803.46675,Cluster-31803.65639,Cluster-31803.69518,Cluster-31803.101418,Cluster-31803.62016,Cluster-31803.81410,Cluster-31803.51240,Cluster-31803.45854,Cluster-31803.56684,Cluster-31803.78456,Cluster-31803.59364,Cluster-31803.62795,Cluster-31803.42009,Cluster-31803.45483,Cluster-31803.55475,Cluster-31803.9787…
GO:0070271	protein complex biogenesis	biological_process	1	16	Cluster-31803.91237,Cluster-31803.54463,Cluster-31803.61089,Cluster-31803.12153,Cluster-31803.19238,Cluster-31803.102830,Cluster-31803.42009,Cluster-31803.55475,Cluster-31803.79185,Cluster-31803.22459,Cluster-31803.47177,Cluster-31803.45024,Cluster-31803.52096,Cluster-31803.47890,Cluster-31803.10715,Cluster-31803.24020
GO:0031399	regulation of protein modification process	biological_process	1	3	Cluster-31803.23353,Cluster-31803.106118,Cluster-31803.52096
GO:0004527	exonuclease activity	molecular_function	1	6	Cluster-31803.85230,Cluster-31803.90461,Cluster-31803.68814,Cluster-31803.19238,Cluster-31803.22459,Cluster-31803.39821
GO:0046857	oxidoreductase activity, acting on other nitrogenous compounds as donors, with NAD or NADP as acceptor	molecular_function	1	1	Cluster-31803.98072
GO:0098754	detoxification	biological_process	1	1	Cluster-31803.48726
GO:0008484	sulfuric ester hydrolase activity	molecular_function	1	1	Cluster-31803.51240
GO:0043385	mycotoxin metabolic process	biological_process	1	1	Cluster-31803.39801
GO:0043386	mycotoxin biosynthetic process	biological_process	1	1	Cluster-31803.39801
GO:0045122	aflatoxin biosynthetic process	biological_process	1	1	Cluster-31803.39801
GO:0046222	aflatoxin metabolic process	biological_process	1	1	Cluster-31803.39801
GO:1901376	organic heteropentacyclic compound metabolic process	biological_process	1	1	Cluster-31803.39801
GO:1901378	organic heteropentacyclic compound biosynthetic process	biological_process	1	1	Cluster-31803.39801
GO:0031329	regulation of cellular catabolic process	biological_process	1	6	Cluster-31803.23353,Cluster-31803.48754,Cluster-31803.91237,Cluster-31803.52989,Cluster-31803.52096,Cluster-31803.32161
GO:0018995	host	cellular_component	1	9	Cluster-31803.73411,Cluster-31803.91219,Cluster-31803.61089,Cluster-31803.100697,Cluster-31803.42361,Cluster-31803.41973,Cluster-31803.60827,Cluster-31803.105902,Cluster-31803.42009
GO:0043657	host cell	cellular_component	1	9	Cluster-31803.73411,Cluster-31803.100697,Cluster-31803.91219,Cluster-31803.61089,Cluster-31803.60827,Cluster-31803.41973,Cluster-31803.42361,Cluster-31803.105902,Cluster-31803.42009
GO:0046916	cellular transition metal ion homeostasis	biological_process	1	1	Cluster-31803.72549
GO:0019825	oxygen binding	molecular_function	1	1	Cluster-31803.11135
GO:0044215	other organism	cellular_component	1	9	Cluster-31803.100697,Cluster-31803.91219,Cluster-31803.61089,Cluster-31803.73411,Cluster-31803.42009,Cluster-31803.105902,Cluster-31803.60827,Cluster-31803.41973,Cluster-31803.42361
GO:0044216	other organism cell	cellular_component	1	9	Cluster-31803.105902,Cluster-31803.42009,Cluster-31803.60827,Cluster-31803.41973,Cluster-31803.42361,Cluster-31803.100697,Cluster-31803.61089,Cluster-31803.91219,Cluster-31803.73411
GO:0044217	other organism part	cellular_component	1	9	Cluster-31803.91219,Cluster-31803.61089,Cluster-31803.100697,Cluster-31803.73411,Cluster-31803.105902,Cluster-31803.42009,Cluster-31803.42361,Cluster-31803.41973,Cluster-31803.60827
GO:0009262	deoxyribonucleotide metabolic process	biological_process	1	1	Cluster-31803.71782
GO:0030029	actin filament-based process	biological_process	1	2	Cluster-31803.56684,Cluster-31803.49084
GO:0030036	actin cytoskeleton organization	biological_process	1	2	Cluster-31803.56684,Cluster-31803.49084
GO:1990267	response to transition metal nanoparticle	biological_process	1	1	Cluster-31803.46994
GO:0080134	regulation of response to stress	biological_process	1	2	Cluster-31803.68814,Cluster-31803.27182
GO:0022008	neurogenesis	biological_process	1	1	Cluster-31803.91716
GO:0046487	glyoxylate metabolic process	biological_process	1	2	Cluster-31803.58329,Cluster-31803.4794
GO:0010605	negative regulation of macromolecule metabolic process	biological_process	1	5	Cluster-31803.52096,Cluster-31803.101311,Cluster-31803.23353,Cluster-31803.94002,Cluster-31803.90853
GO:0009415	response to water	biological_process	1	2	Cluster-31803.48074,Cluster-31803.91237
GO:0005623	cell	cellular_component	1	290	Cluster-31803.69982,Cluster-31803.44454,Cluster-31803.80077,Cluster-31803.47890,Cluster-31803.25822,Cluster-31803.52926,Cluster-31803.99429,Cluster-31803.59464,Cluster-31803.54524,Cluster-31803.35115,Cluster-31803.22459,Cluster-31803.29294,Cluster-31803.60827,Cluster-31803.54211,Cluster-31803.63418,Cluster-31803.19238,Cluster-31803.44058,Cluster-31803.94898,Cluster-31803.80840,Cluster-31803.61089…
GO:0044464	cell part	cellular_component	1	290	Cluster-31803.70281,Cluster-31803.54236,Cluster-31803.51706,Cluster-31803.97049,Cluster-31803.67069,Cluster-31803.46795,Cluster-31803.12153,Cluster-31803.57530,Cluster-31803.82464,Cluster-31803.45750,Cluster-31803.102530,Cluster-31803.40334,Cluster-31803.74993,Cluster-31803.25899,Cluster-31803.26272,Cluster-31803.64605,Cluster-31803.93098,Cluster-31803.65426,Cluster-31803.36923,Cluster-31803.4437…
GO:0031975	envelope	cellular_component	1	16	Cluster-31803.43813,Cluster-31803.24266,Cluster-31803.5552,Cluster-31803.48798,Cluster-31803.67069,Cluster-31803.48966,Cluster-31803.93098,Cluster-31803.72674,Cluster-31803.70958,Cluster-31803.76092,Cluster-31803.47008,Cluster-31803.43812,Cluster-31803.74308,Cluster-31803.87481,Cluster-31803.45214,Cluster-31803.63151
GO:0006537	glutamate biosynthetic process	biological_process	1	1	Cluster-31803.67069
GO:1901576	organic substance biosynthetic process	biological_process	1	227	Cluster-31803.82464,Cluster-31803.37116,Cluster-31803.15455,Cluster-31803.102530,Cluster-31803.74993,Cluster-31803.40334,Cluster-31803.26272,Cluster-31803.25899,Cluster-31803.103378,Cluster-31803.64605,Cluster-31803.76092,Cluster-31803.70281,Cluster-31803.41140,Cluster-31803.60760,Cluster-31803.30091,Cluster-31803.45694,Cluster-31803.55575,Cluster-31803.31653,Cluster-31803.43254,Cluster-31803.670…
GO:0004659	prenyltransferase activity	molecular_function	1	3	Cluster-31803.44422,Cluster-31803.64895,Cluster-31803.30779
GO:0016818	hydrolase activity, acting on acid anhydrides, in phosphorus-containing anhydrides	molecular_function	1	60	Cluster-31803.21566,Cluster-31803.15455,Cluster-31803.87789,Cluster-31803.55854,Cluster-31803.53879,Cluster-31803.74328,Cluster-31803.51045,Cluster-31803.44112,Cluster-31803.42103,Cluster-31803.107323,Cluster-31803.71379,Cluster-31803.101418,Cluster-31803.40334,Cluster-31803.47008,Cluster-31803.32685,Cluster-31803.31653,Cluster-31803.97871,Cluster-31803.30779,Cluster-31803.55475,Cluster-31803.702…
GO:0010604	positive regulation of macromolecule metabolic process	biological_process	1	4	Cluster-31803.44221,Cluster-31803.72458,Cluster-31803.25822,Cluster-31803.25826
GO:0042025	host cell nucleus	cellular_component	1	7	Cluster-31803.91219,Cluster-31803.61089,Cluster-31803.42009,Cluster-31803.60827,Cluster-31803.73411,Cluster-31803.41973,Cluster-31803.42361
GO:0006261	DNA-dependent DNA replication	biological_process	1	8	Cluster-31803.55859,Cluster-31803.27182,Cluster-31803.75355,Cluster-31803.75518,Cluster-31803.55854,Cluster-31803.54693,Cluster-31803.58994,Cluster-31803.62866
GO:0006418	tRNA aminoacylation for protein translation	biological_process	1	6	Cluster-31803.75298,Cluster-31803.51122,Cluster-31803.84659,Cluster-31803.28776,Cluster-31803.86310,Cluster-31803.52171
GO:0006522	alanine metabolic process	biological_process	1	3	Cluster-31803.101505,Cluster-31803.25539,Cluster-31803.81751
GO:0009078	pyruvate family amino acid metabolic process	biological_process	1	3	Cluster-31803.81751,Cluster-31803.25539,Cluster-31803.101505
GO:0007031	peroxisome organization	biological_process	1	1	Cluster-31803.33595
GO:0000390	spliceosomal complex disassembly	biological_process	1	1	Cluster-31803.79056
GO:0005684	U2-type spliceosomal complex	cellular_component	1	1	Cluster-31803.79056
GO:0032988	ribonucleoprotein complex disassembly	biological_process	1	1	Cluster-31803.79056
GO:0071008	U2-type post-mRNA release spliceosomal complex	cellular_component	1	1	Cluster-31803.79056
GO:0071014	post-mRNA release spliceosomal complex	cellular_component	1	1	Cluster-31803.79056
GO:0006687	glycosphingolipid metabolic process	biological_process	1	2	Cluster-31803.54317,Cluster-31803.62016
GO:0043043	peptide biosynthetic process	biological_process	1	35	Cluster-31803.52171,Cluster-31803.54317,Cluster-31803.28776,Cluster-31803.75298,Cluster-31803.45483,Cluster-31803.41140,Cluster-31803.60760,Cluster-31803.95747,Cluster-31803.40334,Cluster-31803.74993,Cluster-31803.62016,Cluster-31803.29590,Cluster-31803.21566,Cluster-31803.75438,Cluster-31803.51447,Cluster-31803.82464,Cluster-31803.51122,Cluster-31803.71701,Cluster-31803.83172,Cluster-31803.65936…
GO:0016593	Cdc73/Paf1 complex	cellular_component	1	1	Cluster-31803.27182
GO:0033647	host intracellular organelle	cellular_component	1	7	Cluster-31803.41973,Cluster-31803.73411,Cluster-31803.42361,Cluster-31803.60827,Cluster-31803.42009,Cluster-31803.91219,Cluster-31803.61089
GO:0033648	host intracellular membrane-bounded organelle	cellular_component	1	7	Cluster-31803.42361,Cluster-31803.41973,Cluster-31803.73411,Cluster-31803.60827,Cluster-31803.42009,Cluster-31803.61089,Cluster-31803.91219
GO:0000774	adenyl-nucleotide exchange factor activity	molecular_function	1	1	Cluster-31803.39015
GO:0004525	ribonuclease III activity	molecular_function	1	1	Cluster-31803.32222
GO:0032296	double-stranded RNA-specific ribonuclease activity	molecular_function	1	1	Cluster-31803.32222
GO:0051128	regulation of cellular component organization	biological_process	1	7	Cluster-31803.15545,Cluster-31803.23353,Cluster-31803.42340,Cluster-31803.38204,Cluster-31803.52096,Cluster-31803.25822,Cluster-31803.25826
GO:0046112	nucleobase biosynthetic process	biological_process	1	1	Cluster-31803.73246
GO:0000808	origin recognition complex	cellular_component	1	1	Cluster-31803.38204
GO:0006869	lipid transport	biological_process	1	3	Cluster-31803.23749,Cluster-31803.69543,Cluster-31803.92931
GO:0004497	monooxygenase activity	molecular_function	1	5	Cluster-31803.42103,Cluster-31803.13827,Cluster-31803.69335,Cluster-31803.50040,Cluster-31803.66090
GO:0009755	hormone-mediated signaling pathway	biological_process	1	1	Cluster-31803.38855
GO:0032870	cellular response to hormone stimulus	biological_process	1	1	Cluster-31803.38855
GO:0003774	motor activity	molecular_function	1	5	Cluster-31803.55475,Cluster-31803.13827,Cluster-31803.71379,Cluster-31803.6639,Cluster-31803.30323
GO:0016627	oxidoreductase activity, acting on the CH-CH group of donors	molecular_function	1	10	Cluster-31803.25826,Cluster-31803.25822,Cluster-31803.4794,Cluster-31803.63151,Cluster-31803.80077,Cluster-31803.30091,Cluster-31803.79189,Cluster-31803.98485,Cluster-31803.77576,Cluster-31803.76193
GO:0051169	nuclear transport	biological_process	1	5	Cluster-31803.93098,Cluster-31803.47890,Cluster-31803.86873,Cluster-31803.45214,Cluster-31803.48798
GO:0000149	SNARE binding	molecular_function	1	1	Cluster-31803.40352
GO:0019905	syntaxin binding	molecular_function	1	1	Cluster-31803.40352
GO:0006119	oxidative phosphorylation	biological_process	1	9	Cluster-31803.57662,Cluster-31803.74400,Cluster-31803.62748,Cluster-31803.42219,Cluster-31803.48966,Cluster-31803.39821,Cluster-31803.72674,Cluster-31803.77209,Cluster-31803.55475
GO:0016846	carbon-sulfur lyase activity	molecular_function	1	2	Cluster-31803.33376,Cluster-31803.95113
GO:0046497	nicotinate nucleotide metabolic process	biological_process	1	1	Cluster-31803.71481
GO:0044877	macromolecular complex binding	molecular_function	1	12	Cluster-31803.73411,Cluster-31803.59364,Cluster-31803.61344,Cluster-31803.6639,Cluster-31803.91237,Cluster-31803.26254,Cluster-31803.31653,Cluster-31803.85714,Cluster-31803.90956,Cluster-31803.103557,Cluster-31803.55475,Cluster-31803.75518
GO:0006694	steroid biosynthetic process	biological_process	1	7	Cluster-31803.25826,Cluster-31803.44422,Cluster-31803.45214,Cluster-31803.30779,Cluster-31803.48798,Cluster-31803.66143,Cluster-31803.25822
GO:0016628	oxidoreductase activity, acting on the CH-CH group of donors, NAD or NADP as acceptor	molecular_function	1	5	Cluster-31803.98485,Cluster-31803.25826,Cluster-31803.25822,Cluster-31803.4794,Cluster-31803.76193
GO:0009064	glutamine family amino acid metabolic process	biological_process	1	7	Cluster-31803.30959,Cluster-31803.69518,Cluster-31803.54211,Cluster-31803.67069,Cluster-31803.27706,Cluster-31803.84659,Cluster-31803.38042
GO:0007548	sex differentiation	biological_process	1	1	Cluster-31803.62748
GO:0019359	nicotinamide nucleotide biosynthetic process	biological_process	1	1	Cluster-31803.71481
GO:0008199	ferric iron binding	molecular_function	1	1	Cluster-31803.72549
GO:0016407	acetyltransferase activity	molecular_function	1	7	Cluster-31803.69742,Cluster-31803.90919,Cluster-31803.61344,Cluster-31803.9888,Cluster-31803.85878,Cluster-31803.38855,Cluster-31803.57662
GO:0009894	regulation of catabolic process	biological_process	1	6	Cluster-31803.23353,Cluster-31803.91237,Cluster-31803.52096,Cluster-31803.52989,Cluster-31803.32161,Cluster-31803.48754
GO:0003854	3-beta-hydroxy-delta5-steroid dehydrogenase activity	molecular_function	1	3	Cluster-31803.25826,Cluster-31803.66143,Cluster-31803.25822
GO:0008207	C21-steroid hormone metabolic process	biological_process	1	3	Cluster-31803.25826,Cluster-31803.25822,Cluster-31803.66143
GO:0033764	steroid dehydrogenase activity, acting on the CH-OH group of donors, NAD or NADP as acceptor	molecular_function	1	3	Cluster-31803.66143,Cluster-31803.25822,Cluster-31803.25826
GO:0008209	androgen metabolic process	biological_process	1	3	Cluster-31803.25822,Cluster-31803.66143,Cluster-31803.25826
GO:0008210	estrogen metabolic process	biological_process	1	3	Cluster-31803.25826,Cluster-31803.66143,Cluster-31803.25822
GO:0016229	steroid dehydrogenase activity	molecular_function	1	3	Cluster-31803.25826,Cluster-31803.25822,Cluster-31803.66143
GO:0006536	glutamate metabolic process	biological_process	1	2	Cluster-31803.38042,Cluster-31803.67069
GO:0006400	tRNA modification	biological_process	1	11	Cluster-31803.31080,Cluster-31803.79189,Cluster-31803.87789,Cluster-31803.30779,Cluster-31803.39022,Cluster-31803.46795,Cluster-31803.54524,Cluster-31803.107323,Cluster-31803.44422,Cluster-31803.51240,Cluster-31803.18502
GO:0008202	steroid metabolic process	biological_process	1	7	Cluster-31803.25826,Cluster-31803.44422,Cluster-31803.45214,Cluster-31803.48798,Cluster-31803.30779,Cluster-31803.66143,Cluster-31803.25822
GO:0006020	inositol metabolic process	biological_process	1	1	Cluster-31803.77576
GO:0019363	pyridine nucleotide biosynthetic process	biological_process	1	1	Cluster-31803.71481
GO:0072527	pyrimidine-containing compound metabolic process	biological_process	1	15	Cluster-31803.59911,Cluster-31803.73246,Cluster-31803.46681,Cluster-31803.97049,Cluster-31803.107323,Cluster-31803.71264,Cluster-31803.71782,Cluster-31803.94898,Cluster-31803.46767,Cluster-31803.48726,Cluster-31803.51719,Cluster-31803.93098,Cluster-31803.36923,Cluster-31803.25438,Cluster-31803.46305
GO:0071949	FAD binding	molecular_function	1	6	Cluster-31803.69721,Cluster-31803.72549,Cluster-31803.91464,Cluster-31803.48726,Cluster-31803.29666,Cluster-31803.56122
GO:0006928	movement of cell or subcellular component	biological_process	1	12	Cluster-31803.30323,Cluster-31803.91716,Cluster-31803.79723,Cluster-31803.55475,Cluster-31803.29294,Cluster-31803.6639,Cluster-31803.91237,Cluster-31803.23170,Cluster-31803.71379,Cluster-31803.13827,Cluster-31803.98613,Cluster-31803.45024
GO:0043038	amino acid activation	biological_process	1	6	Cluster-31803.51122,Cluster-31803.75298,Cluster-31803.52171,Cluster-31803.84659,Cluster-31803.28776,Cluster-31803.86310
GO:0043039	tRNA aminoacylation	biological_process	1	6	Cluster-31803.86310,Cluster-31803.28776,Cluster-31803.84659,Cluster-31803.52171,Cluster-31803.75298,Cluster-31803.51122
GO:0034754	cellular hormone metabolic process	biological_process	1	3	Cluster-31803.25826,Cluster-31803.25822,Cluster-31803.66143
GO:0042445	hormone metabolic process	biological_process	1	3	Cluster-31803.25822,Cluster-31803.66143,Cluster-31803.25826
GO:0004970	ionotropic glutamate receptor activity	molecular_function	1	1	Cluster-31803.105554
GO:0008066	glutamate receptor activity	molecular_function	1	1	Cluster-31803.105554
GO:0006531	aspartate metabolic process	biological_process	1	2	Cluster-31803.25539,Cluster-31803.81751
GO:0071495	cellular response to endogenous stimulus	biological_process	1	1	Cluster-31803.38855
GO:0010817	regulation of hormone levels	biological_process	1	3	Cluster-31803.66143,Cluster-31803.25822,Cluster-31803.25826
GO:0000502	proteasome complex	cellular_component	1	2	Cluster-31803.95113,Cluster-31803.45750
GO:0048870	cell motility	biological_process	1	8	Cluster-31803.30323,Cluster-31803.79723,Cluster-31803.29294,Cluster-31803.13827,Cluster-31803.91237,Cluster-31803.23170,Cluster-31803.45024,Cluster-31803.98613
GO:0051674	localization of cell	biological_process	1	8	Cluster-31803.30323,Cluster-31803.79723,Cluster-31803.29294,Cluster-31803.91237,Cluster-31803.23170,Cluster-31803.13827,Cluster-31803.98613,Cluster-31803.45024
GO:0044380	protein localization to cytoskeleton	biological_process	1	1	Cluster-31803.91237
GO:0071988	protein localization to spindle pole body	biological_process	1	1	Cluster-31803.91237
GO:0072698	protein localization to microtubule cytoskeleton	biological_process	1	1	Cluster-31803.91237
GO:0005739	mitochondrion	cellular_component	1	17	Cluster-31803.48966,Cluster-31803.67069,Cluster-31803.12153,Cluster-31803.15545,Cluster-31803.70958,Cluster-31803.72674,Cluster-31803.55475,Cluster-31803.74308,Cluster-31803.47008,Cluster-31803.76092,Cluster-31803.57662,Cluster-31803.51447,Cluster-31803.33376,Cluster-31803.42524,Cluster-31803.46994,Cluster-31803.38204,Cluster-31803.26998
GO:0033014	tetrapyrrole biosynthetic process	biological_process	1	11	Cluster-31803.6659,Cluster-31803.30091,Cluster-31803.4794,Cluster-31803.70958,Cluster-31803.77576,Cluster-31803.15518,Cluster-31803.76092,Cluster-31803.38855,Cluster-31803.98485,Cluster-31803.24959,Cluster-31803.45498
GO:1902911	protein kinase complex	cellular_component	1	4	Cluster-31803.69139,Cluster-31803.23749,Cluster-31803.93526,Cluster-31803.13827
GO:0017111	nucleoside-triphosphatase activity	molecular_function	1	56	Cluster-31803.44374,Cluster-31803.65426,Cluster-31803.41973,Cluster-31803.75518,Cluster-31803.64155,Cluster-31803.90956,Cluster-31803.60636,Cluster-31803.107691,Cluster-31803.71264,Cluster-31803.82761,Cluster-31803.47799,Cluster-31803.15588,Cluster-31803.6639,Cluster-31803.38106,Cluster-31803.54463,Cluster-31803.45498,Cluster-31803.47594,Cluster-31803.26592,Cluster-31803.19074,Cluster-31803.14245…
GO:0009081	branched-chain amino acid metabolic process	biological_process	1	7	Cluster-31803.54710,Cluster-31803.46795,Cluster-31803.52297,Cluster-31803.75298,Cluster-31803.72549,Cluster-31803.33595,Cluster-31803.54712
GO:0006568	tryptophan metabolic process	biological_process	1	8	Cluster-31803.52297,Cluster-31803.82070,Cluster-31803.64574,Cluster-31803.46795,Cluster-31803.54710,Cluster-31803.54712,Cluster-31803.72549,Cluster-31803.107323
GO:0006586	indolalkylamine metabolic process	biological_process	1	8	Cluster-31803.72549,Cluster-31803.54712,Cluster-31803.107323,Cluster-31803.46795,Cluster-31803.54710,Cluster-31803.82070,Cluster-31803.64574,Cluster-31803.52297
GO:0051287	NAD binding	molecular_function	1	9	Cluster-31803.54710,Cluster-31803.46795,Cluster-31803.72892,Cluster-31803.54712,Cluster-31803.80840,Cluster-31803.46994,Cluster-31803.52297,Cluster-31803.4794,Cluster-31803.28588
GO:0016616	oxidoreductase activity, acting on the CH-OH group of donors, NAD or NADP as acceptor	molecular_function	1	14	Cluster-31803.29666,Cluster-31803.46994,Cluster-31803.52297,Cluster-31803.25826,Cluster-31803.25822,Cluster-31803.57786,Cluster-31803.66143,Cluster-31803.54710,Cluster-31803.21555,Cluster-31803.46795,Cluster-31803.98965,Cluster-31803.72549,Cluster-31803.26296,Cluster-31803.54712
GO:0006573	valine metabolic process	biological_process	1	6	Cluster-31803.75298,Cluster-31803.72549,Cluster-31803.54712,Cluster-31803.54710,Cluster-31803.46795,Cluster-31803.52297
GO:0016301	kinase activity	molecular_function	1	57	Cluster-31803.48694,Cluster-31803.95642,Cluster-31803.79832,Cluster-31803.66661,Cluster-31803.44827,Cluster-31803.68033,Cluster-31803.45055,Cluster-31803.69139,Cluster-31803.86747,Cluster-31803.15005,Cluster-31803.64167,Cluster-31803.58061,Cluster-31803.18133,Cluster-31803.102830,Cluster-31803.44058,Cluster-31803.68257,Cluster-31803.65630,Cluster-31803.71264,Cluster-31803.54463,Cluster-31803.4759…
GO:0043226	organelle	cellular_component	1	202	Cluster-31803.6430,Cluster-31803.90853,Cluster-31803.70735,Cluster-31803.46994,Cluster-31803.40352,Cluster-31803.42524,Cluster-31803.26592,Cluster-31803.92232,Cluster-31803.101311,Cluster-31803.62576,Cluster-31803.79723,Cluster-31803.105902,Cluster-31803.69296,Cluster-31803.30323,Cluster-31803.9113,Cluster-31803.42340,Cluster-31803.44422,Cluster-31803.42361,Cluster-31803.62383,Cluster-31803.59478…
GO:0009297	pilus assembly	biological_process	1	1	Cluster-31803.55837
GO:0043711	pilus organization	biological_process	1	1	Cluster-31803.55837
GO:0038023	signaling receptor activity	molecular_function	1	12	Cluster-31803.75445,Cluster-31803.55475,Cluster-31803.105554,Cluster-31803.79266,Cluster-31803.40297,Cluster-31803.62104,Cluster-31803.23749,Cluster-31803.81384,Cluster-31803.25899,Cluster-31803.9845,Cluster-31803.13827,Cluster-31803.65630
GO:0009507	chloroplast	cellular_component	1	4	Cluster-31803.24959,Cluster-31803.67069,Cluster-31803.46994,Cluster-31803.102494
GO:0007631	feeding behavior	biological_process	1	1	Cluster-31803.29237
GO:1901606	alpha-amino acid catabolic process	biological_process	1	8	Cluster-31803.21601,Cluster-31803.54712,Cluster-31803.72549,Cluster-31803.54710,Cluster-31803.46795,Cluster-31803.96358,Cluster-31803.46305,Cluster-31803.52297
GO:0000439	core TFIIH complex	cellular_component	1	1	Cluster-31803.23170
GO:0070085	glycosylation	biological_process	1	3	Cluster-31803.58128,Cluster-31803.104362,Cluster-31803.64563
GO:0003747	translation release factor activity	molecular_function	1	1	Cluster-31803.42340
GO:0008079	translation termination factor activity	molecular_function	1	1	Cluster-31803.42340
GO:0018444	translation release factor complex	cellular_component	1	1	Cluster-31803.42340
GO:0031090	organelle membrane	cellular_component	1	26	Cluster-31803.30686,Cluster-31803.43813,Cluster-31803.44058,Cluster-31803.55037,Cluster-31803.48966,Cluster-31803.36429,Cluster-31803.33595,Cluster-31803.68814,Cluster-31803.31653,Cluster-31803.93098,Cluster-31803.75518,Cluster-31803.77209,Cluster-31803.72674,Cluster-31803.70958,Cluster-31803.104362,Cluster-31803.90956,Cluster-31803.58685,Cluster-31803.76092,Cluster-31803.100697,Cluster-31803.470…
GO:0043167	ion binding	molecular_function	1	245	Cluster-31803.64602,Cluster-31803.66661,Cluster-31803.44422,Cluster-31803.42219,Cluster-31803.49128,Cluster-31803.48689,Cluster-31803.82470,Cluster-31803.19074,Cluster-31803.101505,Cluster-31803.46994,Cluster-31803.63981,Cluster-31803.52629,Cluster-31803.14245,Cluster-31803.90372,Cluster-31803.79723,Cluster-31803.64167,Cluster-31803.69296,Cluster-31803.49765,Cluster-31803.59222,Cluster-31803.3507…
GO:0005856	cytoskeleton	cellular_component	1	24	Cluster-31803.35115,Cluster-31803.59464,Cluster-31803.39015,Cluster-31803.9113,Cluster-31803.65639,Cluster-31803.46435,Cluster-31803.71379,Cluster-31803.46994,Cluster-31803.67849,Cluster-31803.76770,Cluster-31803.47890,Cluster-31803.52096,Cluster-31803.71701,Cluster-31803.62576,Cluster-31803.73411,Cluster-31803.49084,Cluster-31803.57916,Cluster-31803.91237,Cluster-31803.6639,Cluster-31803.41549,C…
GO:0030312	external encapsulating structure	cellular_component	1	11	Cluster-31803.63151,Cluster-31803.54211,Cluster-31803.92817,Cluster-31803.87481,Cluster-31803.45632,Cluster-31803.54463,Cluster-31803.15545,Cluster-31803.46795,Cluster-31803.68598,Cluster-31803.51248,Cluster-31803.83110
GO:0006614	SRP-dependent cotranslational protein targeting to membrane	biological_process	1	4	Cluster-31803.64167,Cluster-31803.64155,Cluster-31803.26254,Cluster-31803.107691
GO:0045047	protein targeting to ER	biological_process	1	4	Cluster-31803.64155,Cluster-31803.64167,Cluster-31803.107691,Cluster-31803.26254
GO:0072599	establishment of protein localization to endoplasmic reticulum	biological_process	1	4	Cluster-31803.64167,Cluster-31803.64155,Cluster-31803.26254,Cluster-31803.107691
GO:0007155	cell adhesion	biological_process	1	5	Cluster-31803.86747,Cluster-31803.59478,Cluster-31803.58994,Cluster-31803.86873,Cluster-31803.90853
GO:0040011	locomotion	biological_process	1	12	Cluster-31803.98613,Cluster-31803.45024,Cluster-31803.23170,Cluster-31803.91237,Cluster-31803.13827,Cluster-31803.29294,Cluster-31803.86324,Cluster-31803.6659,Cluster-31803.79723,Cluster-31803.30323,Cluster-31803.91716,Cluster-31803.105582
GO:0006754	ATP biosynthetic process	biological_process	1	4	Cluster-31803.70958,Cluster-31803.47890,Cluster-31803.47008,Cluster-31803.76092
GO:0005509	calcium ion binding	molecular_function	1	12	Cluster-31803.48689,Cluster-31803.54240,Cluster-31803.63981,Cluster-31803.47741,Cluster-31803.45966,Cluster-31803.48726,Cluster-31803.54238,Cluster-31803.58685,Cluster-31803.40472,Cluster-31803.91237,Cluster-31803.87059,Cluster-31803.42103
GO:0008716	D-alanine-D-alanine ligase activity	molecular_function	1	1	Cluster-31803.101505
GO:0046144	D-alanine family amino acid metabolic process	biological_process	1	1	Cluster-31803.101505
GO:0046436	D-alanine metabolic process	biological_process	1	1	Cluster-31803.101505
GO:0000904	cell morphogenesis involved in differentiation	biological_process	1	1	Cluster-31803.91716
GO:0009056	catabolic process	biological_process	1	46	Cluster-31803.96358,Cluster-31803.45750,Cluster-31803.74328,Cluster-31803.63151,Cluster-31803.21601,Cluster-31803.62016,Cluster-31803.86873,Cluster-31803.76844,Cluster-31803.21942,Cluster-31803.64574,Cluster-31803.46305,Cluster-31803.13827,Cluster-31803.91237,Cluster-31803.54712,Cluster-31803.72549,Cluster-31803.54317,Cluster-31803.57530,Cluster-31803.46795,Cluster-31803.36206,Cluster-31803.63296…
GO:0004871	signal transducer activity	molecular_function	1	17	Cluster-31803.13827,Cluster-31803.9845,Cluster-31803.54463,Cluster-31803.65630,Cluster-31803.55475,Cluster-31803.105554,Cluster-31803.75445,Cluster-31803.81384,Cluster-31803.95642,Cluster-31803.61344,Cluster-31803.25899,Cluster-31803.15005,Cluster-31803.79266,Cluster-31803.105582,Cluster-31803.23749,Cluster-31803.62104,Cluster-31803.40297
GO:0006281	DNA repair	biological_process	1	25	Cluster-31803.23170,Cluster-31803.44038,Cluster-31803.38106,Cluster-31803.99504,Cluster-31803.70289,Cluster-31803.101354,Cluster-31803.60636,Cluster-31803.70281,Cluster-31803.43576,Cluster-31803.30779,Cluster-31803.45694,Cluster-31803.53448,Cluster-31803.44374,Cluster-31803.46305,Cluster-31803.101418,Cluster-31803.32685,Cluster-31803.25899,Cluster-31803.42103,Cluster-31803.44422,Cluster-31803.957…
GO:0009401	phosphoenolpyruvate-dependent sugar phosphotransferase system	biological_process	1	2	Cluster-31803.68814,Cluster-31803.72549
GO:0016151	nickel cation binding	molecular_function	1	2	Cluster-31803.100020,Cluster-31803.95113
GO:0034357	photosynthetic membrane	cellular_component	1	8	Cluster-31803.91237,Cluster-31803.67069,Cluster-31803.79185,Cluster-31803.108194,Cluster-31803.47741,Cluster-31803.48726,Cluster-31803.67031,Cluster-31803.63981
GO:0006613	cotranslational protein targeting to membrane	biological_process	1	4	Cluster-31803.64155,Cluster-31803.64167,Cluster-31803.107691,Cluster-31803.26254
GO:0008536	Ran GTPase binding	molecular_function	1	2	Cluster-31803.59364,Cluster-31803.78065
GO:0006415	translational termination	biological_process	1	1	Cluster-31803.42340
GO:0006449	regulation of translational termination	biological_process	1	1	Cluster-31803.42340
GO:0006721	terpenoid metabolic process	biological_process	1	8	Cluster-31803.44422,Cluster-31803.48798,Cluster-31803.91464,Cluster-31803.72549,Cluster-31803.56122,Cluster-31803.45214,Cluster-31803.30779,Cluster-31803.29666
GO:0016114	terpenoid biosynthetic process	biological_process	1	8	Cluster-31803.48798,Cluster-31803.91464,Cluster-31803.44422,Cluster-31803.72549,Cluster-31803.56122,Cluster-31803.30779,Cluster-31803.45214,Cluster-31803.29666
GO:0055076	transition metal ion homeostasis	biological_process	1	1	Cluster-31803.72549
GO:0004675	transmembrane receptor protein serine/threonine kinase activity	molecular_function	1	1	Cluster-31803.9845
GO:0016894	endonuclease activity, active with either ribo- or deoxyribonucleic acids and producing 3'-phosphomonoesters	molecular_function	1	1	Cluster-31803.27054
GO:0015081	sodium ion transmembrane transporter activity	molecular_function	1	3	Cluster-31803.55037,Cluster-31803.27706,Cluster-31803.58906
GO:0016887	ATPase activity	molecular_function	1	35	Cluster-31803.30779,Cluster-31803.70202,Cluster-31803.35937,Cluster-31803.23170,Cluster-31803.79690,Cluster-31803.58700,Cluster-31803.19072,Cluster-31803.53879,Cluster-31803.55854,Cluster-31803.87789,Cluster-31803.15455,Cluster-31803.71379,Cluster-31803.107323,Cluster-31803.47008,Cluster-31803.101418,Cluster-31803.44112,Cluster-31803.64155,Cluster-31803.60636,Cluster-31803.44374,Cluster-31803.654…
GO:0030436	asexual sporulation	biological_process	1	1	Cluster-31803.91237
GO:0016661	oxidoreductase activity, acting on other nitrogenous compounds as donors	molecular_function	1	1	Cluster-31803.98072
GO:0006549	isoleucine metabolic process	biological_process	1	6	Cluster-31803.46795,Cluster-31803.52297,Cluster-31803.54710,Cluster-31803.54712,Cluster-31803.72549,Cluster-31803.75298
GO:0044267	cellular protein metabolic process	biological_process	1	118	Cluster-31803.75133,Cluster-31803.45694,Cluster-31803.46305,Cluster-31803.41140,Cluster-31803.60760,Cluster-31803.54238,Cluster-31803.20011,Cluster-31803.52171,Cluster-31803.9845,Cluster-31803.75298,Cluster-31803.31635,Cluster-31803.15455,Cluster-31803.21566,Cluster-31803.38204,Cluster-31803.66155,Cluster-31803.82464,Cluster-31803.51122,Cluster-31803.45750,Cluster-31803.71701,Cluster-31803.95747,…
GO:0016884	carbon-nitrogen ligase activity, with glutamine as amido-N-donor	molecular_function	1	1	Cluster-31803.38042
GO:0001101	response to acid chemical	biological_process	1	2	Cluster-31803.48074,Cluster-31803.91237
GO:0019064	fusion of virus membrane with host plasma membrane	biological_process	1	1	Cluster-31803.6659
GO:0039663	membrane fusion involved in viral entry into host cell	biological_process	1	1	Cluster-31803.6659
GO:0044800	multi-organism membrane fusion	biological_process	1	1	Cluster-31803.6659
GO:0044803	multi-organism membrane organization	biological_process	1	1	Cluster-31803.6659
GO:1901565	organonitrogen compound catabolic process	biological_process	1	11	Cluster-31803.52297,Cluster-31803.46305,Cluster-31803.96358,Cluster-31803.46795,Cluster-31803.54710,Cluster-31803.54317,Cluster-31803.54712,Cluster-31803.72549,Cluster-31803.13827,Cluster-31803.21601,Cluster-31803.62016
GO:0042886	amide transport	biological_process	1	1	Cluster-31803.13827
GO:0005743	mitochondrial inner membrane	cellular_component	1	6	Cluster-31803.70958,Cluster-31803.47008,Cluster-31803.74308,Cluster-31803.48966,Cluster-31803.72674,Cluster-31803.76092
GO:0090407	organophosphate biosynthetic process	biological_process	1	18	Cluster-31803.107323,Cluster-31803.47008,Cluster-31803.76092,Cluster-31803.71481,Cluster-31803.37116,Cluster-31803.47890,Cluster-31803.102530,Cluster-31803.48689,Cluster-31803.87789,Cluster-31803.15455,Cluster-31803.45486,Cluster-31803.38042,Cluster-31803.71782,Cluster-31803.45484,Cluster-31803.25539,Cluster-31803.77209,Cluster-31803.81751,Cluster-31803.70958
GO:0009288	bacterial-type flagellum	cellular_component	1	2	Cluster-31803.13827,Cluster-31803.30323
GO:0033218	amide binding	molecular_function	1	1	Cluster-31803.26254
GO:0019318	hexose metabolic process	biological_process	1	9	Cluster-31803.59602,Cluster-31803.40957,Cluster-31803.21942,Cluster-31803.54317,Cluster-31803.77576,Cluster-31803.57530,Cluster-31803.44058,Cluster-31803.53354,Cluster-31803.62016
GO:0006090	pyruvate metabolic process	biological_process	1	8	Cluster-31803.59602,Cluster-31803.27706,Cluster-31803.40957,Cluster-31803.77576,Cluster-31803.57530,Cluster-31803.44058,Cluster-31803.72329,Cluster-31803.21942
GO:0009966	regulation of signal transduction	biological_process	1	6	Cluster-31803.81410,Cluster-31803.54463,Cluster-31803.70281,Cluster-31803.52988,Cluster-31803.38204,Cluster-31803.15545
GO:0004784	superoxide dismutase activity	molecular_function	1	1	Cluster-31803.55383
GO:0016721	oxidoreductase activity, acting on superoxide radicals as acceptor	molecular_function	1	1	Cluster-31803.55383
GO:0043412	macromolecule modification	biological_process	1	88	Cluster-31803.95022,Cluster-31803.67031,Cluster-31803.26007,Cluster-31803.24020,Cluster-31803.87789,Cluster-31803.40265,Cluster-31803.10715,Cluster-31803.79266,Cluster-31803.75355,Cluster-31803.78456,Cluster-31803.65725,Cluster-31803.88081,Cluster-31803.51240,Cluster-31803.24311,Cluster-31803.100522,Cluster-31803.13030,Cluster-31803.97871,Cluster-31803.77209,Cluster-31803.70206,Cluster-31803.8054…
GO:0006760	folic acid-containing compound metabolic process	biological_process	1	4	Cluster-31803.71782,Cluster-31803.77209,Cluster-31803.45498,Cluster-31803.4794
GO:0008276	protein methyltransferase activity	molecular_function	1	4	Cluster-31803.38204,Cluster-31803.18502,Cluster-31803.39022,Cluster-31803.51240
GO:0004872	receptor activity	molecular_function	1	14	Cluster-31803.23749,Cluster-31803.81384,Cluster-31803.40297,Cluster-31803.95712,Cluster-31803.62104,Cluster-31803.75445,Cluster-31803.79266,Cluster-31803.55475,Cluster-31803.105554,Cluster-31803.23780,Cluster-31803.65630,Cluster-31803.13827,Cluster-31803.25899,Cluster-31803.9845
GO:0042430	indole-containing compound metabolic process	biological_process	1	8	Cluster-31803.46795,Cluster-31803.54710,Cluster-31803.54712,Cluster-31803.72549,Cluster-31803.107323,Cluster-31803.52297,Cluster-31803.82070,Cluster-31803.64574
GO:0050789	regulation of biological process	biological_process	1	169	Cluster-31803.55874,Cluster-31803.21441,Cluster-31803.59478,Cluster-31803.6639,Cluster-31803.38042,Cluster-31803.25254,Cluster-31803.58906,Cluster-31803.101311,Cluster-31803.105582,Cluster-31803.69296,Cluster-31803.105902,Cluster-31803.90853,Cluster-31803.55406,Cluster-31803.42524,Cluster-31803.95712,Cluster-31803.44422,Cluster-31803.42340,Cluster-31803.59210,Cluster-31803.43520,Cluster-31803.454…
GO:0051920	peroxiredoxin activity	molecular_function	1	1	Cluster-31803.44374
GO:0032984	macromolecular complex disassembly	biological_process	1	2	Cluster-31803.42340,Cluster-31803.79056
GO:0005261	cation channel activity	molecular_function	1	11	Cluster-31803.18763,Cluster-31803.58906,Cluster-31803.59364,Cluster-31803.55037,Cluster-31803.54463,Cluster-31803.49879,Cluster-31803.93098,Cluster-31803.54240,Cluster-31803.54236,Cluster-31803.45483,Cluster-31803.35654
GO:0006099	tricarboxylic acid cycle	biological_process	1	4	Cluster-31803.59602,Cluster-31803.46994,Cluster-31803.40957,Cluster-31803.53354
GO:0006101	citrate metabolic process	biological_process	1	4	Cluster-31803.53354,Cluster-31803.40957,Cluster-31803.59602,Cluster-31803.46994
GO:0042132	fructose 1,6-bisphosphate 1-phosphatase activity	molecular_function	1	1	Cluster-31803.44058
GO:0006743	ubiquinone metabolic process	biological_process	1	2	Cluster-31803.69005,Cluster-31803.55475
GO:0006744	ubiquinone biosynthetic process	biological_process	1	2	Cluster-31803.55475,Cluster-31803.69005
GO:0005794	Golgi apparatus	cellular_component	1	6	Cluster-31803.104362,Cluster-31803.61344,Cluster-31803.25822,Cluster-31803.36429,Cluster-31803.64563,Cluster-31803.92232
GO:0007399	nervous system development	biological_process	1	1	Cluster-31803.91716
GO:0007017	microtubule-based process	biological_process	1	8	Cluster-31803.71701,Cluster-31803.55475,Cluster-31803.62576,Cluster-31803.41140,Cluster-31803.73411,Cluster-31803.71379,Cluster-31803.6639,Cluster-31803.91237
GO:0060089	molecular transducer activity	molecular_function	1	19	Cluster-31803.81384,Cluster-31803.75445,Cluster-31803.55475,Cluster-31803.105554,Cluster-31803.65630,Cluster-31803.54463,Cluster-31803.9845,Cluster-31803.13827,Cluster-31803.95712,Cluster-31803.40297,Cluster-31803.62104,Cluster-31803.23749,Cluster-31803.23780,Cluster-31803.105582,Cluster-31803.79266,Cluster-31803.15005,Cluster-31803.25899,Cluster-31803.61344,Cluster-31803.95642
GO:0031514	motile cilium	cellular_component	1	6	Cluster-31803.91237,Cluster-31803.79723,Cluster-31803.23170,Cluster-31803.45024,Cluster-31803.98613,Cluster-31803.29294
GO:0051276	chromosome organization	biological_process	1	13	Cluster-31803.70281,Cluster-31803.52096,Cluster-31803.27182,Cluster-31803.65426,Cluster-31803.23353,Cluster-31803.45694,Cluster-31803.46305,Cluster-31803.23170,Cluster-31803.80840,Cluster-31803.44038,Cluster-31803.78451,Cluster-31803.38656,Cluster-31803.78456
GO:0044428	nuclear part	cellular_component	1	62	Cluster-31803.45483,Cluster-31803.74549,Cluster-31803.46305,Cluster-31803.85955,Cluster-31803.26254,Cluster-31803.97871,Cluster-31803.46681,Cluster-31803.62959,Cluster-31803.64597,Cluster-31803.23170,Cluster-31803.59911,Cluster-31803.57530,Cluster-31803.46767,Cluster-31803.15518,Cluster-31803.24266,Cluster-31803.36206,Cluster-31803.5552,Cluster-31803.51719,Cluster-31803.45214,Cluster-31803.25438,…
GO:0016765	transferase activity, transferring alkyl or aryl (other than methyl) groups	molecular_function	1	5	Cluster-31803.99504,Cluster-31803.30779,Cluster-31803.44422,Cluster-31803.64895,Cluster-31803.45498
GO:0043648	dicarboxylic acid metabolic process	biological_process	1	9	Cluster-31803.25822,Cluster-31803.81751,Cluster-31803.25826,Cluster-31803.77209,Cluster-31803.25539,Cluster-31803.71782,Cluster-31803.76193,Cluster-31803.38042,Cluster-31803.67069
GO:2000026	regulation of multicellular organismal development	biological_process	1	1	Cluster-31803.41951
GO:0000346	transcription export complex	cellular_component	1	1	Cluster-31803.39015
GO:0000445	THO complex part of transcription export complex	cellular_component	1	1	Cluster-31803.39015
GO:0006612	protein targeting to membrane	biological_process	1	4	Cluster-31803.64155,Cluster-31803.64167,Cluster-31803.107691,Cluster-31803.26254
GO:0016706	oxidoreductase activity, acting on paired donors, with incorporation or reduction of molecular oxygen, 2-oxoglutarate as one donor, and incorporation of one atom each of oxygen into both donors	molecular_function	1	1	Cluster-31803.63895
GO:0010646	regulation of cell communication	biological_process	1	6	Cluster-31803.38204,Cluster-31803.15545,Cluster-31803.81410,Cluster-31803.52988,Cluster-31803.70281,Cluster-31803.54463
GO:0051129	negative regulation of cellular component organization	biological_process	1	2	Cluster-31803.23353,Cluster-31803.52096
GO:0043248	proteasome assembly	biological_process	1	1	Cluster-31803.47177
GO:0031967	organelle envelope	cellular_component	1	14	Cluster-31803.72674,Cluster-31803.45214,Cluster-31803.70958,Cluster-31803.93098,Cluster-31803.48966,Cluster-31803.67069,Cluster-31803.48798,Cluster-31803.74308,Cluster-31803.43812,Cluster-31803.47008,Cluster-31803.76092,Cluster-31803.24266,Cluster-31803.43813,Cluster-31803.5552
GO:0046416	D-amino acid metabolic process	biological_process	1	1	Cluster-31803.101505
GO:0006974	cellular response to DNA damage stimulus	biological_process	1	26	Cluster-31803.44038,Cluster-31803.38106,Cluster-31803.23170,Cluster-31803.70289,Cluster-31803.99504,Cluster-31803.101354,Cluster-31803.43576,Cluster-31803.70281,Cluster-31803.60636,Cluster-31803.30779,Cluster-31803.45694,Cluster-31803.46305,Cluster-31803.53448,Cluster-31803.44374,Cluster-31803.32685,Cluster-31803.25899,Cluster-31803.74964,Cluster-31803.101418,Cluster-31803.44422,Cluster-31803.421…
GO:0016714	oxidoreductase activity, acting on paired donors, with incorporation or reduction of molecular oxygen, reduced pteridine as one donor, and incorporation of one atom of oxygen	molecular_function	1	1	Cluster-31803.42103
GO:0023051	regulation of signaling	biological_process	1	6	Cluster-31803.81410,Cluster-31803.70281,Cluster-31803.54463,Cluster-31803.52988,Cluster-31803.38204,Cluster-31803.15545
GO:0065003	macromolecular complex assembly	biological_process	1	16	Cluster-31803.24020,Cluster-31803.10715,Cluster-31803.52096,Cluster-31803.47890,Cluster-31803.45024,Cluster-31803.47177,Cluster-31803.22459,Cluster-31803.79185,Cluster-31803.55475,Cluster-31803.42009,Cluster-31803.102830,Cluster-31803.19238,Cluster-31803.12153,Cluster-31803.54463,Cluster-31803.61089,Cluster-31803.91237
GO:0005657	replication fork	cellular_component	1	12	Cluster-31803.54524,Cluster-31803.38106,Cluster-31803.32685,Cluster-31803.101418,Cluster-31803.23170,Cluster-31803.44422,Cluster-31803.42103,Cluster-31803.97871,Cluster-31803.44374,Cluster-31803.60636,Cluster-31803.70281,Cluster-31803.30779
GO:0008134	transcription factor binding	molecular_function	1	11	Cluster-31803.39015,Cluster-31803.54524,Cluster-31803.101418,Cluster-31803.23170,Cluster-31803.91237,Cluster-31803.44422,Cluster-31803.55854,Cluster-31803.44374,Cluster-31803.47890,Cluster-31803.55859,Cluster-31803.30779
GO:0009063	cellular amino acid catabolic process	biological_process	1	8	Cluster-31803.96358,Cluster-31803.46305,Cluster-31803.52297,Cluster-31803.21601,Cluster-31803.72549,Cluster-31803.54712,Cluster-31803.54710,Cluster-31803.46795
GO:0003777	microtubule motor activity	molecular_function	1	3	Cluster-31803.55475,Cluster-31803.71379,Cluster-31803.6639
GO:0009536	plastid	cellular_component	1	4	Cluster-31803.46994,Cluster-31803.102494,Cluster-31803.67069,Cluster-31803.24959
GO:0072350	tricarboxylic acid metabolic process	biological_process	1	4	Cluster-31803.59602,Cluster-31803.46994,Cluster-31803.40957,Cluster-31803.53354
GO:0016835	carbon-oxygen lyase activity	molecular_function	1	6	Cluster-31803.15518,Cluster-31803.6659,Cluster-31803.38855,Cluster-31803.59210,Cluster-31803.82070,Cluster-31803.33273
GO:0042127	regulation of cell proliferation	biological_process	1	1	Cluster-31803.43520
GO:0008312	7S RNA binding	molecular_function	1	1	Cluster-31803.26254
GO:0006665	sphingolipid metabolic process	biological_process	1	2	Cluster-31803.54317,Cluster-31803.62016
GO:0006511	ubiquitin-dependent protein catabolic process	biological_process	1	7	Cluster-31803.45750,Cluster-31803.28798,Cluster-31803.63296,Cluster-31803.52096,Cluster-31803.90956,Cluster-31803.76844,Cluster-31803.23353
GO:0006952	defense response	biological_process	1	16	Cluster-31803.86310,Cluster-31803.69742,Cluster-31803.56206,Cluster-31803.46994,Cluster-31803.46675,Cluster-31803.71701,Cluster-31803.66724,Cluster-31803.47890,Cluster-31803.27182,Cluster-31803.28282,Cluster-31803.14245,Cluster-31803.20998,Cluster-31803.91237,Cluster-31803.26197,Cluster-31803.47741,Cluster-31803.41140
GO:0016811	hydrolase activity, acting on carbon-nitrogen (but not peptide) bonds, in linear amides	molecular_function	1	2	Cluster-31803.78456,Cluster-31803.78451
GO:0000278	mitotic cell cycle	biological_process	1	6	Cluster-31803.91237,Cluster-31803.41140,Cluster-31803.52096,Cluster-31803.62576,Cluster-31803.71701,Cluster-31803.23353
GO:1903047	mitotic cell cycle process	biological_process	1	6	Cluster-31803.71701,Cluster-31803.62576,Cluster-31803.52096,Cluster-31803.91237,Cluster-31803.41140,Cluster-31803.23353
GO:0022411	cellular component disassembly	biological_process	1	2	Cluster-31803.79056,Cluster-31803.42340
GO:0009129	pyrimidine nucleoside monophosphate metabolic process	biological_process	1	1	Cluster-31803.71782
GO:0009130	pyrimidine nucleoside monophosphate biosynthetic process	biological_process	1	1	Cluster-31803.71782
GO:0009521	photosystem	cellular_component	1	7	Cluster-31803.67031,Cluster-31803.63981,Cluster-31803.47741,Cluster-31803.91237,Cluster-31803.108194,Cluster-31803.48726,Cluster-31803.67069
GO:1901661	quinone metabolic process	biological_process	1	2	Cluster-31803.69005,Cluster-31803.55475
GO:1901663	quinone biosynthetic process	biological_process	1	2	Cluster-31803.55475,Cluster-31803.69005
GO:0016755	transferase activity, transferring amino-acyl groups	molecular_function	1	2	Cluster-31803.15979,Cluster-31803.26272
GO:0004812	aminoacyl-tRNA ligase activity	molecular_function	1	5	Cluster-31803.86310,Cluster-31803.28776,Cluster-31803.84659,Cluster-31803.51122,Cluster-31803.75298
GO:0070461	SAGA-type complex	cellular_component	1	2	Cluster-31803.38106,Cluster-31803.26998
GO:0019530	taurine metabolic process	biological_process	1	1	Cluster-31803.26272
GO:0016684	oxidoreductase activity, acting on peroxide as acceptor	molecular_function	1	2	Cluster-31803.64574,Cluster-31803.44374
GO:0044436	thylakoid part	cellular_component	1	8	Cluster-31803.47741,Cluster-31803.108194,Cluster-31803.48726,Cluster-31803.67031,Cluster-31803.63981,Cluster-31803.91237,Cluster-31803.67069,Cluster-31803.79185
GO:0031423	hexon binding	molecular_function	1	1	Cluster-31803.32107
GO:0019028	viral capsid	cellular_component	1	18	Cluster-31803.62301,Cluster-31803.23353,Cluster-31803.64563,Cluster-31803.29186,Cluster-31803.29185,Cluster-31803.7833,Cluster-31803.55874,Cluster-31803.28909,Cluster-31803.30686,Cluster-31803.42029,Cluster-31803.40725,Cluster-31803.19232,Cluster-31803.9086,Cluster-31803.16955,Cluster-31803.80182,Cluster-31803.82844,Cluster-31803.63296,Cluster-31803.9085
GO:0006777	Mo-molybdopterin cofactor biosynthetic process	biological_process	1	2	Cluster-31803.87789,Cluster-31803.15455
GO:0019720	Mo-molybdopterin cofactor metabolic process	biological_process	1	2	Cluster-31803.15455,Cluster-31803.87789
GO:0006184	obsolete GTP catabolic process	biological_process	1	2	Cluster-31803.21566,Cluster-31803.40334
GO:0005618	cell wall	cellular_component	1	1	Cluster-31803.51248
GO:0009579	thylakoid	cellular_component	1	8	Cluster-31803.108194,Cluster-31803.47741,Cluster-31803.48726,Cluster-31803.67031,Cluster-31803.63981,Cluster-31803.91237,Cluster-31803.67069,Cluster-31803.79185
GO:0043934	sporulation	biological_process	1	1	Cluster-31803.91237
GO:0000347	THO complex	cellular_component	1	1	Cluster-31803.39015
GO:0043624	cellular protein complex disassembly	biological_process	1	1	Cluster-31803.42340
GO:0008649	rRNA methyltransferase activity	molecular_function	1	1	Cluster-31803.39022
GO:0034622	cellular macromolecular complex assembly	biological_process	1	11	Cluster-31803.79185,Cluster-31803.47177,Cluster-31803.45024,Cluster-31803.102830,Cluster-31803.61089,Cluster-31803.54463,Cluster-31803.24020,Cluster-31803.52096,Cluster-31803.42009,Cluster-31803.55475,Cluster-31803.10715
GO:0070887	cellular response to chemical stimulus	biological_process	1	4	Cluster-31803.38855,Cluster-31803.96358,Cluster-31803.48726,Cluster-31803.46305
GO:0016836	hydro-lyase activity	molecular_function	1	5	Cluster-31803.15518,Cluster-31803.6659,Cluster-31803.33273,Cluster-31803.59210,Cluster-31803.38855
GO:0030414	peptidase inhibitor activity	molecular_function	1	4	Cluster-31803.55243,Cluster-31803.61564,Cluster-31803.20011,Cluster-31803.60007
GO:0061134	peptidase regulator activity	molecular_function	1	4	Cluster-31803.55243,Cluster-31803.20011,Cluster-31803.60007,Cluster-31803.61564
GO:0007018	microtubule-based movement	biological_process	1	3	Cluster-31803.71379,Cluster-31803.55475,Cluster-31803.6639
GO:0016620	oxidoreductase activity, acting on the aldehyde or oxo group of donors, NAD or NADP as acceptor	molecular_function	1	2	Cluster-31803.64155,Cluster-31803.48689
GO:0043229	intracellular organelle	cellular_component	1	197	Cluster-31803.35115,Cluster-31803.13126,Cluster-31803.54524,Cluster-31803.59464,Cluster-31803.82992,Cluster-31803.61344,Cluster-31803.74308,Cluster-31803.53273,Cluster-31803.24959,Cluster-31803.108977,Cluster-31803.69982,Cluster-31803.80077,Cluster-31803.67849,Cluster-31803.47890,Cluster-31803.25822,Cluster-31803.55859,Cluster-31803.94898,Cluster-31803.44058,Cluster-31803.77933,Cluster-31803.6108…
GO:1902533	positive regulation of intracellular signal transduction	biological_process	1	1	Cluster-31803.81410
GO:0006508	proteolysis	biological_process	1	46	Cluster-31803.77576,Cluster-31803.82992,Cluster-31803.83180,Cluster-31803.13126,Cluster-31803.79185,Cluster-31803.28798,Cluster-31803.42219,Cluster-31803.31416,Cluster-31803.69742,Cluster-31803.45055,Cluster-31803.88388,Cluster-31803.95712,Cluster-31803.108977,Cluster-31803.63296,Cluster-31803.50184,Cluster-31803.52096,Cluster-31803.44058,Cluster-31803.95113,Cluster-31803.45498,Cluster-31803.7793…
GO:0005577	fibrinogen complex	cellular_component	1	2	Cluster-31803.45024,Cluster-31803.52096
GO:0030168	platelet activation	biological_process	1	2	Cluster-31803.45024,Cluster-31803.52096
GO:0005996	monosaccharide metabolic process	biological_process	1	9	Cluster-31803.40957,Cluster-31803.59602,Cluster-31803.62016,Cluster-31803.53354,Cluster-31803.44058,Cluster-31803.57530,Cluster-31803.77576,Cluster-31803.54317,Cluster-31803.21942
GO:0007091	metaphase/anaphase transition of mitotic cell cycle	biological_process	1	2	Cluster-31803.52096,Cluster-31803.23353
GO:0010965	regulation of mitotic sister chromatid separation	biological_process	1	2	Cluster-31803.52096,Cluster-31803.23353
GO:0030071	regulation of mitotic metaphase/anaphase transition	biological_process	1	2	Cluster-31803.52096,Cluster-31803.23353
GO:0031145	anaphase-promoting complex-dependent proteasomal ubiquitin-dependent protein catabolic process	biological_process	1	2	Cluster-31803.52096,Cluster-31803.23353
GO:0032434	regulation of proteasomal ubiquitin-dependent protein catabolic process	biological_process	1	2	Cluster-31803.52096,Cluster-31803.23353
GO:0033044	regulation of chromosome organization	biological_process	1	2	Cluster-31803.23353,Cluster-31803.52096
GO:0033045	regulation of sister chromatid segregation	biological_process	1	2	Cluster-31803.23353,Cluster-31803.52096
GO:0033047	regulation of mitotic sister chromatid segregation	biological_process	1	2	Cluster-31803.23353,Cluster-31803.52096
GO:0044784	metaphase/anaphase transition of cell cycle	biological_process	1	2	Cluster-31803.52096,Cluster-31803.23353
GO:0051306	mitotic sister chromatid separation	biological_process	1	2	Cluster-31803.23353,Cluster-31803.52096
GO:0051983	regulation of chromosome segregation	biological_process	1	2	Cluster-31803.23353,Cluster-31803.52096
GO:1902099	regulation of metaphase/anaphase transition of cell cycle	biological_process	1	2	Cluster-31803.23353,Cluster-31803.52096
GO:0004003	ATP-dependent DNA helicase activity	molecular_function	1	1	Cluster-31803.60636
GO:0042181	ketone biosynthetic process	biological_process	1	2	Cluster-31803.55475,Cluster-31803.69005
GO:0016875	ligase activity, forming carbon-oxygen bonds	molecular_function	1	5	Cluster-31803.86310,Cluster-31803.84659,Cluster-31803.28776,Cluster-31803.75298,Cluster-31803.51122
[truncated: 560 more rows]

## Sheet: Enriched GO terms12772
Highly enriched GO terms in 12772 unigenes specifically differentially expressed under high salinity (0.8 M NaCl addition).
GO_accession	Description	Term_type	Corrected_pValue	DEG_item	Gene_names
GO:0006542	glutamine biosynthetic process	biological_process	0.031064	15	Cluster-31803.21024,Cluster-31803.77169,Cluster-31803.111935,Cluster-31803.96028,Cluster-31803.104839,Cluster-31803.9074,Cluster-31803.21028,Cluster-31803.83396,Cluster-31803.97304,Cluster-31803.21029,Cluster-31803.61457,Cluster-31803.18429,Cluster-31803.23364,Cluster-31803.72734,Cluster-31803.74085
GO:0005540	hyaluronic acid binding	molecular_function	0.031064	12	Cluster-31803.46760,Cluster-31803.12431,Cluster-31803.11492,Cluster-31803.12432,Cluster-31803.72690,Cluster-31803.108676,Cluster-31803.103334,Cluster-31803.72691,Cluster-31803.11676,Cluster-31803.16986,Cluster-31803.11276,Cluster-31803.18653
GO:0004356	glutamate-ammonia ligase activity	molecular_function	0.031064	17	Cluster-31803.61457,Cluster-31803.97304,Cluster-31803.21029,Cluster-31803.74085,Cluster-31803.18429,Cluster-31803.23364,Cluster-31803.111935,Cluster-31803.96028,Cluster-31803.77169,Cluster-31803.21028,Cluster-31803.111934,Cluster-31803.72734,Cluster-31803.100953,Cluster-31803.21024,Cluster-31803.9074,Cluster-31803.83396,Cluster-31803.104839
GO:0051130	positive regulation of cellular component organization	biological_process	0.031064	48	Cluster-31803.99042,Cluster-31803.85450,Cluster-31803.21867,Cluster-31803.21064,Cluster-31803.73707,Cluster-31803.56716,Cluster-31803.53973,Cluster-31803.59426,Cluster-31803.50323,Cluster-31803.111244,Cluster-31803.38132,Cluster-31803.72364,Cluster-31803.71903,Cluster-31803.38819,Cluster-31803.49342,Cluster-31803.21065,Cluster-31803.6727,Cluster-31803.31137,Cluster-31803.23677,Cluster-31803.52776…
GO:0010638	positive regulation of organelle organization	biological_process	0.031064	43	Cluster-31803.89427,Cluster-31803.38481,Cluster-31803.89431,Cluster-31803.52773,Cluster-31803.32577,Cluster-31803.34800,Cluster-31803.62425,Cluster-31803.31137,Cluster-31803.52776,Cluster-31803.23677,Cluster-31803.21065,Cluster-31803.6727,Cluster-31803.49342,Cluster-31803.38819,Cluster-31803.71903,Cluster-31803.72364,Cluster-31803.38132,Cluster-31803.111244,Cluster-31803.50323,Cluster-31803.53973…
GO:0010035	response to inorganic substance	biological_process	0.031064	82	Cluster-31803.65965,Cluster-31803.75010,Cluster-31803.52149,Cluster-31803.66026,Cluster-31803.75045,Cluster-31803.81595,Cluster-31803.77030,Cluster-31803.75052,Cluster-31803.33220,Cluster-31803.21255,Cluster-31803.96746,Cluster-31803.28094,Cluster-31803.36871,Cluster-31803.103334,Cluster-31803.47159,Cluster-31803.85043,Cluster-31803.68164,Cluster-31803.65000,Cluster-31803.30490,Cluster-31803.7621…
GO:0006367	transcription initiation from RNA polymerase II promoter	biological_process	0.031064	316	Cluster-31803.101662,Cluster-31803.83726,Cluster-31803.63480,Cluster-31803.86711,Cluster-31803.22489,Cluster-31803.62728,Cluster-31803.61080,Cluster-31803.66108,Cluster-31803.80175,Cluster-31803.76479,Cluster-31803.56760,Cluster-31803.60582,Cluster-31803.79098,Cluster-31803.61874,Cluster-31803.29345,Cluster-31803.42300,Cluster-31803.86349,Cluster-31803.83634,Cluster-31803.22044,Cluster-31803.1105…
GO:0016211	ammonia ligase activity	molecular_function	0.031064	17	Cluster-31803.111934,Cluster-31803.72734,Cluster-31803.21024,Cluster-31803.100953,Cluster-31803.104839,Cluster-31803.9074,Cluster-31803.83396,Cluster-31803.97304,Cluster-31803.21029,Cluster-31803.61457,Cluster-31803.18429,Cluster-31803.23364,Cluster-31803.74085,Cluster-31803.77169,Cluster-31803.111935,Cluster-31803.96028,Cluster-31803.21028
GO:0016880	acid-ammonia (or amide) ligase activity	molecular_function	0.031064	17	Cluster-31803.77169,Cluster-31803.111935,Cluster-31803.96028,Cluster-31803.21028,Cluster-31803.97304,Cluster-31803.21029,Cluster-31803.61457,Cluster-31803.18429,Cluster-31803.23364,Cluster-31803.74085,Cluster-31803.21024,Cluster-31803.100953,Cluster-31803.104839,Cluster-31803.9074,Cluster-31803.83396,Cluster-31803.111934,Cluster-31803.72734
GO:0005672	transcription factor TFIIA complex	cellular_component	0.031112	285	Cluster-31803.29086,Cluster-31803.8323,Cluster-31803.30181,Cluster-31803.43629,Cluster-31803.84572,Cluster-31803.82303,Cluster-31803.81675,Cluster-31803.51363,Cluster-31803.95453,Cluster-31803.32128,Cluster-31803.97339,Cluster-31803.37805,Cluster-31803.74410,Cluster-31803.27358,Cluster-31803.29145,Cluster-31803.75746,Cluster-31803.73662,Cluster-31803.8322,Cluster-31803.71041,Cluster-31803.65671,C…
GO:1901700	response to oxygen-containing compound	biological_process	0.043647	60	Cluster-31803.42865,Cluster-31803.48724,Cluster-31803.36988,Cluster-31803.85594,Cluster-31803.111089,Cluster-31803.54706,Cluster-31803.80134,Cluster-31803.48071,Cluster-31803.36582,Cluster-31803.57586,Cluster-31803.30871,Cluster-31803.64050,Cluster-31803.22794,Cluster-31803.80992,Cluster-31803.66108,Cluster-31803.37221,Cluster-31803.40644,Cluster-31803.46369,Cluster-31803.92793,Cluster-31803.4807…
GO:0090575	RNA polymerase II transcription factor complex	cellular_component	0.043647	305	Cluster-31803.87704,Cluster-31803.56895,Cluster-31803.15138,Cluster-31803.98076,Cluster-31803.47267,Cluster-31803.45566,Cluster-31803.51143,Cluster-31803.14604,Cluster-31803.70582,Cluster-31803.81227,Cluster-31803.29743,Cluster-31803.51111,Cluster-31803.64595,Cluster-31803.77208,Cluster-31803.27130,Cluster-31803.38465,Cluster-31803.76337,Cluster-31803.91102,Cluster-31803.92068,Cluster-31803.51574…
GO:0009967	positive regulation of signal transduction	biological_process	0.048296	53	Cluster-31803.73691,Cluster-31803.79387,Cluster-31803.37189,Cluster-31803.83450,Cluster-31803.78922,Cluster-31803.29698,Cluster-31803.42244,Cluster-31803.57476,Cluster-31803.43136,Cluster-31803.85885,Cluster-31803.85265,Cluster-31803.100902,Cluster-31803.33352,Cluster-31803.11977,Cluster-31803.53200,Cluster-31803.47464,Cluster-31803.62224,Cluster-31803.66108,Cluster-31803.55978,Cluster-31803.3719…
GO:0010647	positive regulation of cell communication	biological_process	0.048296	53	Cluster-31803.38481,Cluster-31803.47462,Cluster-31803.34800,Cluster-31803.49358,Cluster-31803.42242,Cluster-31803.52773,Cluster-31803.88403,Cluster-31803.78382,Cluster-31803.39127,Cluster-31803.24512,Cluster-31803.67617,Cluster-31803.72511,Cluster-31803.77547,Cluster-31803.52776,Cluster-31803.23677,Cluster-31803.64438,Cluster-31803.6727,Cluster-31803.6242,Cluster-31803.88771,Cluster-31803.50198,C…
GO:0023056	positive regulation of signaling	biological_process	0.048296	53	Cluster-31803.47462,Cluster-31803.38481,Cluster-31803.52773,Cluster-31803.34800,Cluster-31803.42242,Cluster-31803.49358,Cluster-31803.24512,Cluster-31803.88403,Cluster-31803.78382,Cluster-31803.39127,Cluster-31803.77547,Cluster-31803.72511,Cluster-31803.67617,Cluster-31803.23677,Cluster-31803.52776,Cluster-31803.6727,Cluster-31803.6242,Cluster-31803.64438,Cluster-31803.50198,Cluster-31803.49342,C…
GO:0015291	secondary active transmembrane transporter activity	molecular_function	0.048296	127	Cluster-31803.80632,Cluster-31803.61323,Cluster-31803.52897,Cluster-31803.90995,Cluster-31803.22957,Cluster-31803.71440,Cluster-31803.53386,Cluster-31803.34450,Cluster-31803.41745,Cluster-31803.51747,Cluster-31803.52887,Cluster-31803.34393,Cluster-31803.64628,Cluster-31803.99238,Cluster-31803.68419,Cluster-31803.51370,Cluster-31803.64275,Cluster-31803.21636,Cluster-31803.51244,Cluster-31803.71268…
GO:0044798	nuclear transcription factor complex	cellular_component	0.048296	305	Cluster-31803.38280,Cluster-31803.34411,Cluster-31803.40895,Cluster-31803.72151,Cluster-31803.107536,Cluster-31803.2376,Cluster-31803.30170,Cluster-31803.73985,Cluster-31803.42366,Cluster-31803.30367,Cluster-31803.71202,Cluster-31803.72699,Cluster-31803.35870,Cluster-31803.72714,Cluster-31803.70814,Cluster-31803.58663,Cluster-31803.8821,Cluster-31803.36814,Cluster-31803.96165,Cluster-31803.32923,…
GO:0001101	response to acid chemical	biological_process	0.048296	50	Cluster-31803.30490,Cluster-31803.76218,Cluster-31803.65000,Cluster-31803.92787,Cluster-31803.84822,Cluster-31803.46369,Cluster-31803.92793,Cluster-31803.48072,Cluster-31803.52266,Cluster-31803.87615,Cluster-31803.98216,Cluster-31803.75108,Cluster-31803.31710,Cluster-31803.48071,Cluster-31803.57586,Cluster-31803.36582,Cluster-31803.22794,Cluster-31803.30871,Cluster-31803.80992,Cluster-31803.37221…
GO:0043231	intracellular membrane-bounded organelle	cellular_component	0.052154	2316	Cluster-31803.109336,Cluster-31803.83495,Cluster-31803.70811,Cluster-31803.86026,Cluster-31803.56961,Cluster-31803.19747,Cluster-31803.60939,Cluster-31803.94099,Cluster-31803.50598,Cluster-31803.63703,Cluster-31803.65938,Cluster-31803.29137,Cluster-31803.51626,Cluster-31803.19011,Cluster-31803.74349,Cluster-31803.39659,Cluster-31803.69856,Cluster-31803.87611,Cluster-31803.44975,Cluster-31803.5863…
.80577,"
GO:0043227	membrane-bounded organelle	cellular_component	0.052154	2318	Cluster-31803.40975,Cluster-31803.52973,Cluster-31803.21160,Cluster-31803.78850,Cluster-31803.16823,Cluster-31803.76263,Cluster-31803.78725,Cluster-31803.104075,Cluster-31803.53218,Cluster-31803.39591,Cluster-31803.72649,Cluster-31803.35487,Cluster-31803.80201,Cluster-31803.61573,Cluster-31803.60020,Cluster-31803.34111,Cluster-31803.58261,Cluster-31803.31329,Cluster-31803.98330,Cluster-31803.8105…
03.7252"
GO:0009415	response to water	biological_process	0.06283	45	Cluster-31803.48071,Cluster-31803.36582,Cluster-31803.57586,Cluster-31803.30871,Cluster-31803.22794,Cluster-31803.37221,Cluster-31803.80992,Cluster-31803.40644,Cluster-31803.36988,Cluster-31803.85594,Cluster-31803.111089,Cluster-31803.30490,Cluster-31803.76218,Cluster-31803.65000,Cluster-31803.92787,Cluster-31803.46369,Cluster-31803.48072,Cluster-31803.92793,Cluster-31803.84822,Cluster-31803.8761…
GO:0009405	pathogenesis	biological_process	0.067781	381	Cluster-31803.91440,Cluster-31803.55699,Cluster-31803.28212,Cluster-31803.78126,Cluster-31803.45878,Cluster-31803.97724,Cluster-31803.80923,Cluster-31803.31717,Cluster-31803.72151,Cluster-31803.81056,Cluster-31803.54781,Cluster-31803.27124,Cluster-31803.43938,Cluster-31803.68322,Cluster-31803.61959,Cluster-31803.27612,Cluster-31803.59957,Cluster-31803.60090,Cluster-31803.52787,Cluster-31803.38145…
GO:0015296	anion:cation symporter activity	molecular_function	0.069191	22	Cluster-31803.45368,Cluster-31803.43310,Cluster-31803.92847,Cluster-31803.20615,Cluster-31803.64628,Cluster-31803.99545,Cluster-31803.51747,Cluster-31803.34450,Cluster-31803.47647,Cluster-31803.90995,Cluster-31803.27009,Cluster-31803.19963,Cluster-31803.32819,Cluster-31803.78382,Cluster-31803.99376,Cluster-31803.45370,Cluster-31803.74020,Cluster-31803.60329,Cluster-31803.71268,Cluster-31803.76773…
GO:0031365	N-terminal protein amino acid modification	biological_process	0.07337	19	Cluster-31803.59664,Cluster-31803.59685,Cluster-31803.59655,Cluster-31803.56008,Cluster-31803.59656,Cluster-31803.59681,Cluster-31803.59657,Cluster-31803.52604,Cluster-31803.59696,Cluster-31803.55170,Cluster-31803.50026,Cluster-31803.56014,Cluster-31803.60101,Cluster-31803.100416,Cluster-31803.60876,Cluster-31803.49190,Cluster-31803.100418,Cluster-31803.59676,Cluster-31803.56012
GO:0048584	positive regulation of response to stimulus	biological_process	0.07337	65	Cluster-31803.62224,Cluster-31803.93638,Cluster-31803.55978,Cluster-31803.20066,Cluster-31803.73013,Cluster-31803.100902,Cluster-31803.11977,Cluster-31803.53200,Cluster-31803.47464,Cluster-31803.29698,Cluster-31803.78922,Cluster-31803.43136,Cluster-31803.85885,Cluster-31803.79387,Cluster-31803.83450,Cluster-31803.34800,Cluster-31803.42242,Cluster-31803.43339,Cluster-31803.52773,Cluster-31803.4746…
GO:0009620	response to fungus	biological_process	0.077113	37	Cluster-31803.42166,Cluster-31803.83425,Cluster-31803.67011,Cluster-31803.40874,Cluster-31803.66698,Cluster-31803.44988,Cluster-31803.47914,Cluster-31803.30817,Cluster-31803.67014,Cluster-31803.6306,Cluster-31803.48124,Cluster-31803.74569,Cluster-31803.53526,Cluster-31803.27840,Cluster-31803.49900,Cluster-31803.38472,Cluster-31803.109336,Cluster-31803.16321,Cluster-31803.35870,Cluster-31803.99180…
GO:0050832	defense response to fungus	biological_process	0.077113	37	Cluster-31803.11201,Cluster-31803.89893,Cluster-31803.64863,Cluster-31803.88818,Cluster-31803.29641,Cluster-31803.20620,Cluster-31803.57859,Cluster-31803.6304,Cluster-31803.75929,Cluster-31803.74930,Cluster-31803.99180,Cluster-31803.73193,Cluster-31803.108148,Cluster-31803.96165,Cluster-31803.82207,Cluster-31803.47912,Cluster-31803.39277,Cluster-31803.74516,Cluster-31803.6306,Cluster-31803.48124,…
GO:0009145	purine nucleoside triphosphate biosynthetic process	biological_process	0.081762	96	Cluster-31803.98763,Cluster-31803.3806,Cluster-31803.54079,Cluster-31803.39525,Cluster-31803.73124,Cluster-31803.49675,Cluster-31803.46372,Cluster-31803.69655,Cluster-31803.99379,Cluster-31803.65789,Cluster-31803.54075,Cluster-31803.66608,Cluster-31803.48096,Cluster-31803.66582,Cluster-31803.111272,Cluster-31803.59789,Cluster-31803.27538,Cluster-31803.35924,Cluster-31803.58931,Cluster-31803.11104…
GO:0009206	purine ribonucleoside triphosphate biosynthetic process	biological_process	0.081762	96	Cluster-31803.72193,Cluster-31803.47811,Cluster-31803.48675,Cluster-31803.46539,Cluster-31803.47006,Cluster-31803.69793,Cluster-31803.61617,Cluster-31803.58892,Cluster-31803.32428,Cluster-31803.111176,Cluster-31803.39524,Cluster-31803.61394,Cluster-31803.54083,Cluster-31803.33253,Cluster-31803.3334,Cluster-31803.48131,Cluster-31803.99044,Cluster-31803.75034,Cluster-31803.65103,Cluster-31803.50469…
GO:0043226	organelle	cellular_component	0.08403	3020	Cluster-31803.58925,Cluster-31803.92135,Cluster-31803.36162,Cluster-31803.9144,Cluster-31803.72662,Cluster-31803.18292,Cluster-31803.82710,Cluster-31803.58794,Cluster-31803.36814,Cluster-31803.71309,Cluster-31803.29516,Cluster-31803.107536,Cluster-31803.87347,Cluster-31803.71813,Cluster-31803.40144,Cluster-31803.79788,Cluster-31803.50456,Cluster-31803.31973,Cluster-31803.32917,Cluster-31803.66785…
ter-318"
GO:0006508	proteolysis	biological_process	0.092084	785	Cluster-31803.41454,Cluster-31803.70394,Cluster-31803.69134,Cluster-31803.55993,Cluster-31803.58190,Cluster-31803.70381,Cluster-31803.51626,Cluster-31803.17633,Cluster-31803.73224,Cluster-31803.50998,Cluster-31803.13257,Cluster-31803.66721,Cluster-31803.82371,Cluster-31803.33458,Cluster-31803.97516,Cluster-31803.51490,Cluster-31803.88895,Cluster-31803.79514,Cluster-31803.70391,Cluster-31803.10940…
GO:0006480	N-terminal protein amino acid methylation	biological_process	0.092693	17	Cluster-31803.59685,Cluster-31803.59664,Cluster-31803.56008,Cluster-31803.59655,Cluster-31803.59656,Cluster-31803.59657,Cluster-31803.59681,Cluster-31803.52604,Cluster-31803.55170,Cluster-31803.59696,Cluster-31803.60101,Cluster-31803.50026,Cluster-31803.56014,Cluster-31803.60876,Cluster-31803.49190,Cluster-31803.59676,Cluster-31803.56012
GO:0009142	nucleoside triphosphate biosynthetic process	biological_process	0.092693	99	Cluster-31803.75033,Cluster-31803.69397,Cluster-31803.54243,Cluster-31803.106038,Cluster-31803.43852,Cluster-31803.73274,Cluster-31803.59894,Cluster-31803.61615,Cluster-31803.61684,Cluster-31803.69084,Cluster-31803.59735,Cluster-31803.39522,Cluster-31803.3698,Cluster-31803.24522,Cluster-31803.101395,Cluster-31803.54874,Cluster-31803.63065,Cluster-31803.35615,Cluster-31803.79802,Cluster-31803.3592…
GO:0009201	ribonucleoside triphosphate biosynthetic process	biological_process	0.092693	99	Cluster-31803.54079,Cluster-31803.3806,Cluster-31803.98763,Cluster-31803.99379,Cluster-31803.65789,Cluster-31803.39525,Cluster-31803.69655,Cluster-31803.49675,Cluster-31803.46372,Cluster-31803.73124,Cluster-31803.111272,Cluster-31803.48096,Cluster-31803.66608,Cluster-31803.54075,Cluster-31803.66582,Cluster-31803.35924,Cluster-31803.58931,Cluster-31803.111044,Cluster-31803.59789,Cluster-31803.2753…
GO:0043229	intracellular organelle	cellular_component	0.09419	2979	Cluster-31803.59791,Cluster-31803.58396,Cluster-31803.75104,Cluster-31803.44732,Cluster-31803.33577,Cluster-31803.71144,Cluster-31803.61098,Cluster-31803.87299,Cluster-31803.102385,Cluster-31803.112211,Cluster-31803.55405,Cluster-31803.57604,Cluster-31803.66698,Cluster-31803.63441,Cluster-31803.38597,Cluster-31803.21803,Cluster-31803.87720,Cluster-31803.15800,Cluster-31803.34443,Cluster-31803.650…
803.672"
GO:1902533	positive regulation of intracellular signal transduction	biological_process	0.094601	33	Cluster-31803.100953,Cluster-31803.26667,Cluster-31803.36036,Cluster-31803.47639,Cluster-31803.88965,Cluster-31803.111163,Cluster-31803.49358,Cluster-31803.42242,Cluster-31803.24512,Cluster-31803.88403,Cluster-31803.78382,Cluster-31803.39127,Cluster-31803.47462,Cluster-31803.6242,Cluster-31803.64438,Cluster-31803.50198,Cluster-31803.88771,Cluster-31803.77547,Cluster-31803.72511,Cluster-31803.6761…
[truncated: 4,879 more rows]

## Sheet: Enriched GO terms 2802
Highly enriched GO terms in 2,802 unigenes differentially expressed under both high and low salinity.
[truncated: 42 more rows]
