# Supplementary material for: Lipid accumulation of Chlorella sp. TLD6B from the Taklimakan Desert under salt stress
Source: PeerJ. 2021 May 31;9:e11525. doi: 10.7717/peerj.11525 (PMC8174150; doi:10.7717/peerj.11525)
Supplement: Supplemental Information 9 [file peerj-09-11525-s009.xlsx]

## Sheet: KEGG enrichment of 828 unigene
KEGG enrichment of 828 unigenes specifically differentially expressed under low salinity (0.1 M NaCl addition).
KEGG pathway	ID	Input number	Background number	Corrected P-Value	Input
Sphingolipid metabolism	ko00600	6	243	0.291857	Cluster-31803.89407|Cluster-31803.54317|Cluster-31803.62016|Cluster-31803.41396|Cluster-31803.41951|Cluster-31803.102494
Pentose phosphate pathway	ko00030	8	419	0.291857	Cluster-31803.54712|Cluster-31803.54710|Cluster-31803.101533|Cluster-31803.51478|Cluster-31803.56331|Cluster-31803.59214|Cluster-31803.52297|Cluster-31803.59222
Nitrogen metabolism	ko00910	5	221	0.358158	Cluster-31803.67069|Cluster-31803.98485|Cluster-31803.106271|Cluster-31803.98072|Cluster-31803.104927
Glycosphingolipid biosynthesis - ganglio series	ko00604	2	35	0.358158	Cluster-31803.54317|Cluster-31803.62016
Lipoic acid metabolism	ko00785	2	39	0.358158	Cluster-31803.35072|Cluster-31803.20011
Glycosaminoglycan degradation	ko00531	2	39	0.358158	Cluster-31803.54317|Cluster-31803.62016
Ubiquinone and other terpenoid-quinone biosynthesis	ko00130	5	261	0.358158	Cluster-31803.15741|Cluster-31803.33359|Cluster-31803.43520|Cluster-31803.32149|Cluster-31803.51240
Starch and sucrose metabolism	ko00500	9	689	0.407526	Cluster-31803.72674|Cluster-31803.64540|Cluster-31803.52629|Cluster-31803.95433|Cluster-31803.39379|Cluster-31803.103557|Cluster-31803.52620|Cluster-31803.62621|Cluster-31803.63940
Pantothenate and CoA biosynthesis	ko00770	5	293	0.419707	Cluster-31803.98711|Cluster-31803.25899|Cluster-31803.88267|Cluster-31803.49879|Cluster-31803.82844
Tyrosine metabolism	ko00350	4	244	0.636186	Cluster-31803.96358|Cluster-31803.15741|Cluster-31803.54693|Cluster-31803.32149
Pentose and glucuronate interconversions	ko00040	4	250	0.636186	Cluster-31803.51981|Cluster-31803.56331|Cluster-31803.59214|Cluster-31803.59222
Selenocompound metabolism	ko00450	4	263	0.66968	Cluster-31803.86324|Cluster-31803.57725|Cluster-31803.48726|Cluster-31803.86310
Histidine metabolism	ko00340	3	201	0.852231	Cluster-31803.93525|Cluster-31803.93526|Cluster-31803.80840
Phagosome	ko04145	6	552	0.852231	Cluster-31803.58685|Cluster-31803.65440|Cluster-31803.50894|Cluster-31803.54236|Cluster-31803.54240|Cluster-31803.54238
Other glycan degradation	ko00511	2	108	0.852231	Cluster-31803.54317|Cluster-31803.62016
Fatty acid biosynthesis	ko00061	4	326	0.852231	Cluster-31803.15683|Cluster-31803.72329|Cluster-31803.21983|Cluster-31803.101505
Citrate cycle (TCA cycle)	ko00020	6	588	0.852231	Cluster-31803.53485|Cluster-31803.90461|Cluster-31803.53354|Cluster-31803.9888|Cluster-31803.97049|Cluster-31803.46994
Galactose metabolism	ko00052	4	344	0.852231	Cluster-31803.39379|Cluster-31803.54317|Cluster-31803.63940|Cluster-31803.62016
Ascorbate and aldarate metabolism	ko00053	3	234	0.852231	Cluster-31803.100697|Cluster-31803.105902|Cluster-31803.81270
Carotenoid biosynthesis	ko00906	2	127	0.852231	Cluster-31803.69721|Cluster-31803.104750
Inositol phosphate metabolism	ko00562	4	373	0.862086	Cluster-31803.100697|Cluster-31803.105902|Cluster-31803.50894|Cluster-31803.65440
Glycolysis / Gluconeogenesis	ko00010	8	896	0.862086	Cluster-31803.40957|Cluster-31803.53354|Cluster-31803.9888|Cluster-31803.57530|Cluster-31803.39379|Cluster-31803.51981|Cluster-31803.97049|Cluster-31803.59602
Circadian rhythm - plant	ko04712	2	141	0.862086	Cluster-31803.49084|Cluster-31803.29543
Glutathione metabolism	ko00480	5	520	0.878956	Cluster-31803.54712|Cluster-31803.54710|Cluster-31803.46994|Cluster-31803.51478|Cluster-31803.52297
Linoleic acid metabolism	ko00591	1	50	0.878956	Cluster-31803.57451
RNA transport	ko03013	9	1108	0.878956	Cluster-31803.93886|Cluster-31803.74871|Cluster-31803.24266|Cluster-31803.91464|Cluster-31803.7700|Cluster-31803.41445|Cluster-31803.41446|Cluster-31803.52096|Cluster-31803.54117
Carbon fixation in photosynthetic organisms	ko00710	5	561	0.878956	Cluster-31803.59222|Cluster-31803.101533|Cluster-31803.59214|Cluster-31803.56331|Cluster-31803.53354
Thiamine metabolism	ko00730	2	175	0.878956	Cluster-31803.45214|Cluster-31803.48798
Pyrimidine metabolism	ko00240	9	1134	0.878956	Cluster-31803.51719|Cluster-31803.73246|Cluster-31803.39821|Cluster-31803.94898|Cluster-31803.46681|Cluster-31803.88267|Cluster-31803.71782|Cluster-31803.48726|Cluster-31803.25899
Phenylalanine metabolism	ko00360	2	179	0.878956	Cluster-31803.15741|Cluster-31803.32149
DNA replication	ko03030	4	447	0.878956	Cluster-31803.55854|Cluster-31803.55859|Cluster-31803.39821|Cluster-31803.38106
Pyruvate metabolism	ko00620	7	873	0.878956	Cluster-31803.72329|Cluster-31803.40957|Cluster-31803.53354|Cluster-31803.9888|Cluster-31803.97049|Cluster-31803.101505|Cluster-31803.59602
Folate biosynthesis	ko00790	2	187	0.878956	Cluster-31803.35712|Cluster-31803.71782
One carbon pool by folate	ko00670	2	192	0.881915	Cluster-31803.71782|Cluster-31803.45498
Riboflavin metabolism	ko00740	1	73	0.891504	Cluster-31803.88544
Steroid biosynthesis	ko00100	2	207	0.891504	Cluster-31803.26197|Cluster-31803.20998
Propanoate metabolism	ko00640	4	497	0.891504	Cluster-31803.72329|Cluster-31803.101505|Cluster-31803.40957|Cluster-31803.59602
alpha-Linolenic acid metabolism	ko00592	2	216	0.891504	Cluster-31803.80077|Cluster-31803.103517
Peroxisome	ko04146	6	799	0.891504	Cluster-31803.80077|Cluster-31803.46994|Cluster-31803.27205|Cluster-31803.64574|Cluster-31803.44422|Cluster-31803.30779
Amino sugar and nucleotide sugar metabolism	ko00520	4	514	0.891504	Cluster-31803.39379|Cluster-31803.62350|Cluster-31803.71467|Cluster-31803.103557
ABC transporters	ko02010	3	371	0.891504	Cluster-31803.64167|Cluster-31803.64155|Cluster-31803.44112
Taurine and hypotaurine metabolism	ko00430	1	90	0.891504	Cluster-31803.67925
Protein processing in endoplasmic reticulum	ko04141	9	1294	0.891504	Cluster-31803.30686|Cluster-31803.25903|Cluster-31803.58685|Cluster-31803.61344|Cluster-31803.54236|Cluster-31803.62104|Cluster-31803.54240|Cluster-31803.54238|Cluster-31803.71874
RNA polymerase	ko03020	3	398	0.891504	Cluster-31803.51719|Cluster-31803.94898|Cluster-31803.46681
Biosynthesis of unsaturated fatty acids	ko01040	2	264	0.891504	Cluster-31803.80077|Cluster-31803.15683
Lysine degradation	ko00310	2	264	0.891504	Cluster-31803.90461|Cluster-31803.54463
Glycine, serine and threonine metabolism	ko00260	4	576	0.891504	Cluster-31803.57530|Cluster-31803.69296|Cluster-31803.84665|Cluster-31803.86747
Plant-pathogen interaction	ko04626	3	430	0.891504	Cluster-31803.42103|Cluster-31803.87059|Cluster-31803.71874
Purine metabolism	ko00230	10	1524	0.891504	Cluster-31803.51719|Cluster-31803.102530|Cluster-31803.39821|Cluster-31803.94898|Cluster-31803.25539|Cluster-31803.46681|Cluster-31803.38042|Cluster-31803.99746|Cluster-31803.82405|Cluster-31803.95968
Aminoacyl-tRNA biosynthesis	ko00970	5	751	0.891504	Cluster-31803.51122|Cluster-31803.84659|Cluster-31803.28776|Cluster-31803.75298|Cluster-31803.86310
Regulation of autophagy	ko04140	2	278	0.891504	Cluster-31803.97871|Cluster-31803.66591
Biotin metabolism	ko00780	1	138	0.927873	Cluster-31803.21983
Terpenoid backbone biosynthesis	ko00900	2	307	0.927873	Cluster-31803.45214|Cluster-31803.48798
Homologous recombination	ko03440	2	308	0.927873	Cluster-31803.38656|Cluster-31803.39821
Mismatch repair	ko03430	2	320	0.942547	Cluster-31803.39821|Cluster-31803.38106
Porphyrin and chlorophyll metabolism	ko00860	3	501	0.950836	Cluster-31803.38855|Cluster-31803.24959|Cluster-31803.13827
Nucleotide excision repair	ko03420	3	515	0.95139	Cluster-31803.39821|Cluster-31803.60636|Cluster-31803.38106
Arginine biosynthesis	ko00220	2	348	0.95139	Cluster-31803.98485|Cluster-31803.30959
beta-Alanine metabolism	ko00410	2	352	0.95139	Cluster-31803.88267|Cluster-31803.25899
Valine, leucine and isoleucine biosynthesis	ko00290	1	179	0.96213	Cluster-31803.69296
N-Glycan biosynthesis	ko00510	2	373	0.96213	Cluster-31803.84160|Cluster-31803.37409
Tryptophan metabolism	ko00380	1	190	0.962954	Cluster-31803.64574
RNA degradation	ko03018	4	797	0.996684	Cluster-31803.93098|Cluster-31803.58994|Cluster-31803.26592|Cluster-31803.36831
Ubiquitin mediated proteolysis	ko04120	5	984	0.996684	Cluster-31803.39869|Cluster-31803.69982|Cluster-31803.70206|Cluster-31803.100020|Cluster-31803.91464
Basal transcription factors	ko03022	1	227	0.996684	Cluster-31803.60636
Glyoxylate and dicarboxylate metabolism	ko00630	3	636	0.996684	Cluster-31803.64574|Cluster-31803.67069|Cluster-31803.53485
Base excision repair	ko03410	1	276	0.999422	Cluster-31803.39821
Glycerolipid metabolism	ko00561	2	498	0.999422	Cluster-31803.51981|Cluster-31803.46767
Ribosome biogenesis in eukaryotes	ko03008	4	911	0.999422	Cluster-31803.7700|Cluster-31803.40265|Cluster-31803.71379|Cluster-31803.42029
Arginine and proline metabolism	ko00330	2	516	0.999422	Cluster-31803.63895|Cluster-31803.42340
Protein export	ko03060	1	324	0.999422	Cluster-31803.62104
Phenylalanine, tyrosine and tryptophan biosynthesis	ko00400	1	325	0.999422	Cluster-31803.107323
Cysteine and methionine metabolism	ko00270	2	589	0.999422	Cluster-31803.4794|Cluster-31803.37600
Alanine, aspartate and glutamate metabolism	ko00250	2	619	0.999422	Cluster-31803.98485|Cluster-31803.25539
Fructose and mannose metabolism	ko00051	1	384	0.999422	Cluster-31803.39379
Fatty acid degradation	ko00071	1	402	0.999422	Cluster-31803.80077
Proteasome	ko03050	1	441	0.999422	Cluster-31803.95113
Endocytosis	ko04144	3	990	0.999422	Cluster-31803.25903|Cluster-31803.77209|Cluster-31803.30323
Plant hormone signal transduction	ko04075	2	753	0.999422	Cluster-31803.68033|Cluster-31803.15005
Glycerophospholipid metabolism	ko00564	1	514	0.999422	Cluster-31803.99746
Spliceosome	ko03040	5	1501	0.999422	Cluster-31803.25903|Cluster-31803.15588|Cluster-31803.93469|Cluster-31803.53879|Cluster-31803.66951
Valine, leucine and isoleucine degradation	ko00280	1	595	0.999422	Cluster-31803.46795
mRNA surveillance pathway	ko03015	1	679	0.999422	Cluster-31803.50666
Ribosome	ko03010	2	1493	0.999422	Cluster-31803.40352|Cluster-31803.96355

## Sheet: KEGG enrichment of 1277 unigene
KEGG enrichment of 12,772 unigenes specifically differentially expressed under high salinity (0.8 M NaCl addition).
KEGG pathway	ID	Input number	Background number	Corrected P-Value	Input
Mismatch repair	ko03430	68	320	5.04738e-06	Cluster-31803.50848|Cluster-31803.82001|Cluster-31803.76483|Cluster-31803.75414|Cluster-31803.35118|Cluster-31803.46873|Cluster-31803.50846|Cluster-31803.86057|Cluster-31803.73933|Cluster-31803.53870|Cluster-31803.29772|Cluster-31803.65843|Cluster-31803.25188|Cluster-31803.50864|Cluster-31803.64746|Cluster-31803.77769|Cluster-31803.81999|Cluster-31803.100483|Cluster-31803.87170|Cluster-31803.8717…
DNA replication	ko03030	81	447	4.87192e-05	Cluster-31803.59817|Cluster-31803.13423|Cluster-31803.82001|Cluster-31803.23302|Cluster-31803.82068|Cluster-31803.93898|Cluster-31803.35118|Cluster-31803.46873|Cluster-31803.52773|Cluster-31803.73933|Cluster-31803.60195|Cluster-31803.55304|Cluster-31803.90798|Cluster-31803.51147|Cluster-31803.82239|Cluster-31803.25188|Cluster-31803.23303|Cluster-31803.101538|Cluster-31803.55932|Cluster-31803.4032…
Nucleotide excision repair	ko03420	86	515	0.00026361	Cluster-31803.59817|Cluster-31803.52462|Cluster-31803.98970|Cluster-31803.40322|Cluster-31803.36424|Cluster-31803.73274|Cluster-31803.29943|Cluster-31803.25189|Cluster-31803.25188|Cluster-31803.42868|Cluster-31803.83082|Cluster-31803.43123|Cluster-31803.46873|Cluster-31803.51040|Cluster-31803.63287|Cluster-31803.84998|Cluster-31803.40181|Cluster-31803.73505|Cluster-31803.73506|Cluster-31803.57720…
Proteasome	ko03050	73	441	0.00119636	Cluster-31803.43115|Cluster-31803.43116|Cluster-31803.83009|Cluster-31803.23030|Cluster-31803.63637|Cluster-31803.51170|Cluster-31803.63019|Cluster-31803.46827|Cluster-31803.48351|Cluster-31803.19946|Cluster-31803.38097|Cluster-31803.77701|Cluster-31803.44498|Cluster-31803.73195|Cluster-31803.95112|Cluster-31803.59294|Cluster-31803.92190|Cluster-31803.46661|Cluster-31803.64026|Cluster-31803.86726…
Photosynthesis	ko00195	32	155	0.00529245	Cluster-31803.45870|Cluster-31803.81532|Cluster-31803.111176|Cluster-31803.22751|Cluster-31803.68929|Cluster-31803.48725|Cluster-31803.34140|Cluster-31803.2770|Cluster-31803.4338|Cluster-31803.40840|Cluster-31803.8600|Cluster-31803.3806|Cluster-31803.3805|Cluster-31803.2388|Cluster-31803.28528|Cluster-31803.111019|Cluster-31803.32141|Cluster-31803.102978|Cluster-8797.2|Cluster-31803.99044|Cluster…
Porphyrin and chlorophyll metabolism	ko00860	72	501	0.0321097	Cluster-31803.24764|Cluster-31803.91150|Cluster-31803.78325|Cluster-31803.100532|Cluster-31803.18826|Cluster-31803.74034|Cluster-31803.80450|Cluster-31803.15795|Cluster-31803.95437|Cluster-31803.89419|Cluster-31803.70115|Cluster-31803.47822|Cluster-31803.74331|Cluster-31803.21550|Cluster-31803.104341|Cluster-31803.39376|Cluster-31803.102444|Cluster-31803.44236|Cluster-31803.76948|Cluster-31803.21…
Galactose metabolism	ko00052	52	344	0.0455511	Cluster-31803.105589|Cluster-31803.82396|Cluster-31803.90080|Cluster-31803.113569|Cluster-31803.27975|Cluster-31803.62741|Cluster-31803.39390|Cluster-31803.40308|Cluster-31803.26734|Cluster-31803.39773|Cluster-31803.26736|Cluster-31803.86464|Cluster-31803.66886|Cluster-31803.29374|Cluster-31803.54985|Cluster-31803.86459|Cluster-31803.22617|Cluster-31803.47456|Cluster-31803.40129|Cluster-31803.401…
Homologous recombination	ko03440	46	308	0.0811178	Cluster-31803.103358|Cluster-31803.53560|Cluster-31803.35118|Cluster-31803.46873|Cluster-31803.73933|Cluster-31803.29772|Cluster-31803.40322|Cluster-31803.88895|Cluster-31803.40181|Cluster-31803.89379|Cluster-31803.44718|Cluster-31803.113319|Cluster-31803.112804|Cluster-31803.102675|Cluster-31803.93234|Cluster-33241.0|Cluster-31803.43715|Cluster-31803.93243|Cluster-31803.23261|Cluster-31803.88038…
Base excision repair	ko03410	41	276	0.11796	Cluster-31803.59817|Cluster-31803.55978|Cluster-31803.52776|Cluster-31803.52773|Cluster-31803.73933|Cluster-31803.92637|Cluster-31803.40322|Cluster-31803.40181|Cluster-31803.100483|Cluster-31803.87170|Cluster-31803.87171|Cluster-31803.86057|Cluster-31803.47929|Cluster-31803.68267|Cluster-31803.29943|Cluster-31803.43715|Cluster-31803.32563|Cluster-31803.96283|Cluster-31803.76483|Cluster-31803.5772…
N-Glycan biosynthesis	ko00510	52	373	0.126465	Cluster-31803.40572|Cluster-31803.40618|Cluster-31803.75983|Cluster-31803.49167|Cluster-31803.33090|Cluster-31803.40249|Cluster-31803.33708|Cluster-31803.90845|Cluster-31803.49023|Cluster-31803.80531|Cluster-31803.67476|Cluster-31803.72726|Cluster-31803.70814|Cluster-31803.65322|Cluster-31803.30554|Cluster-31803.25549|Cluster-31803.25548|Cluster-31803.56608|Cluster-31803.64186|Cluster-31803.24270…
Terpenoid backbone biosynthesis	ko00900	42	307	0.263615	Cluster-31803.80450|Cluster-31803.51301|Cluster-31803.68096|Cluster-31803.77557|Cluster-31803.49437|Cluster-31803.54647|Cluster-31803.97828|Cluster-31803.56138|Cluster-31803.19501|Cluster-31803.19511|Cluster-31803.53252|Cluster-31803.51193|Cluster-31803.41761|Cluster-31803.53992|Cluster-31803.51335|Cluster-31803.86945|Cluster-31803.14369|Cluster-31803.39082|Cluster-31803.23787|Cluster-31803.24564…
Carbapenem biosynthesis	ko00332	4	10	0.263615	Cluster-31803.76044|Cluster-31803.17639|Cluster-31803.76043|Cluster-31803.76049
Oxidative phosphorylation	ko00190	91	757	0.263615	Cluster-31803.78325|Cluster-31803.65851|Cluster-31803.63614|Cluster-31803.76526|Cluster-31803.33145|Cluster-31803.33147|Cluster-31803.57629|Cluster-31803.33253|Cluster-31803.3806|Cluster-8797.2|Cluster-31803.72193|Cluster-31803.61246|Cluster-31803.76625|Cluster-31803.48131|Cluster-31803.66758|Cluster-31803.49930|Cluster-31803.49931|Cluster-31803.43895|Cluster-31803.35924|Cluster-31803.69397|Clust…
Regulation of autophagy	ko04140	38	278	0.263615	Cluster-31803.24177|Cluster-31803.69297|Cluster-31803.82300|Cluster-31803.81707|Cluster-31803.52001|Cluster-31803.94368|Cluster-31803.74503|Cluster-31803.52567|Cluster-31803.51813|Cluster-31803.97035|Cluster-31803.96105|Cluster-31803.29146|Cluster-31803.29145|Cluster-31803.72272|Cluster-31803.52596|Cluster-31803.52592|Cluster-31803.28930|Cluster-31803.24218|Cluster-31803.74508|Cluster-31803.32534…
Basal transcription factors	ko03022	32	227	0.263615	Cluster-31803.82379|Cluster-31803.52462|Cluster-31803.48482|Cluster-31803.25428|Cluster-31803.77705|Cluster-31803.57076|Cluster-31803.36424|Cluster-31803.73274|Cluster-31803.84203|Cluster-31803.43868|Cluster-31803.20938|Cluster-31803.56623|Cluster-31803.51295|Cluster-31803.41775|Cluster-31803.66556|Cluster-31803.83082|Cluster-31803.43123|Cluster-31803.56436|Cluster-31803.63703|Cluster-31803.39522…
Nicotinate and nicotinamide metabolism	ko00760	27	201	0.490736	Cluster-31803.63673|Cluster-31803.63677|Cluster-31803.89589|Cluster-31803.50665|Cluster-31803.76561|Cluster-31803.94362|Cluster-31803.84789|Cluster-31803.22516|Cluster-31803.106950|Cluster-31803.18219|Cluster-31803.73806|Cluster-31803.29316|Cluster-31803.45293|Cluster-31803.101478|Cluster-31803.7015|Cluster-31803.98085|Cluster-31803.27827|Cluster-31803.81526|Cluster-31803.38438|Cluster-31803.2782…
Carbon fixation in photosynthetic organisms	ko00710	66	561	0.490736	Cluster-31803.56461|Cluster-31803.33465|Cluster-31803.65854|Cluster-31803.65870|Cluster-31803.76547|Cluster-31803.4633|Cluster-31803.59117|Cluster-31803.85265|Cluster-31803.85266|Cluster-31803.81623|Cluster-31803.85268|Cluster-31803.64648|Cluster-31803.57106|Cluster-31803.57194|Cluster-31803.53880|Cluster-31803.92607|Cluster-21479.0|Cluster-31803.44613|Cluster-31803.57195|Cluster-31803.38430|Clus…
Nitrogen metabolism	ko00910	29	221	0.490736	Cluster-31803.106766|Cluster-31803.20642|Cluster-31803.61457|Cluster-31803.74487|Cluster-31803.108301|Cluster-31803.10438|Cluster-31803.64921|Cluster-31803.111935|Cluster-31803.111934|Cluster-19688.0|Cluster-31803.96028|Cluster-31803.23364|Cluster-31803.18735|Cluster-31803.20643|Cluster-31803.60251|Cluster-31803.64919|Cluster-31803.91557|Cluster-31803.91555|Cluster-31803.91553|Cluster-31803.91550…
Arginine biosynthesis	ko00220	43	348	0.490736	Cluster-31803.40208|Cluster-31803.103119|Cluster-31803.36781|Cluster-31803.61457|Cluster-31803.47305|Cluster-31803.4633|Cluster-31803.108301|Cluster-31803.70589|Cluster-31803.64921|Cluster-31803.72925|Cluster-31803.38256|Cluster-31803.24981|Cluster-31803.51039|Cluster-31803.111935|Cluster-31803.111934|Cluster-19688.0|Cluster-31803.40077|Cluster-31803.96028|Cluster-31803.23364|Cluster-31803.52420|…
Glycolysis / Gluconeogenesis	ko00010	101	896	0.490736	Cluster-31803.100683|Cluster-31803.100682|Cluster-31803.82396|Cluster-31803.60732|Cluster-31803.107236|Cluster-31803.113569|Cluster-31803.74251|Cluster-31803.65032|Cluster-31803.39773|Cluster-31803.47856|Cluster-31803.44613|Cluster-31803.59522|Cluster-31803.47252|Cluster-31803.36987|Cluster-31803.100675|Cluster-31803.44655|Cluster-31803.83087|Cluster-31803.49035|Cluster-31803.56322|Cluster-31803.…
Sphingolipid metabolism	ko00600	31	243	0.511202	Cluster-31803.96688|Cluster-31803.26106|Cluster-31803.105589|Cluster-31803.25408|Cluster-31803.26775|Cluster-31803.44054|Cluster-31803.62741|Cluster-31803.39390|Cluster-31803.26734|Cluster-31803.26736|Cluster-31803.74520|Cluster-31803.55513|Cluster-31803.77289|Cluster-31803.87160|Cluster-31803.40129|Cluster-31803.40126|Cluster-31803.49823|Cluster-31803.40122|Cluster-31803.41375|Cluster-31803.2541…
Pentose phosphate pathway	ko00030	50	419	0.511202	Cluster-23603.1|Cluster-31803.36238|Cluster-31803.76547|Cluster-31803.113569|Cluster-31803.69655|Cluster-31803.106447|Cluster-31803.61399|Cluster-31803.61394|Cluster-31803.40308|Cluster-31803.65032|Cluster-21479.0|Cluster-31803.96675|Cluster-31803.41780|Cluster-31803.41781|Cluster-31803.82714|Cluster-31803.47859|Cluster-31803.61392|Cluster-31803.96045|Cluster-31803.54985|Cluster-31803.69381|Clust…
Pyrimidine metabolism	ko00240	124	1134	0.543624	Cluster-31803.59817|Cluster-31803.43224|Cluster-31803.39570|Cluster-31803.20751|Cluster-31803.80764|Cluster-31803.19147|Cluster-31803.59894|Cluster-31803.55932|Cluster-31803.40322|Cluster-31803.95179|Cluster-31803.57094|Cluster-31803.97095|Cluster-31803.7015|Cluster-31803.74398|Cluster-31803.97098|Cluster-31803.81204|Cluster-31803.41553|Cluster-31803.43715|Cluster-31803.51926|Cluster-31803.36858|…
Glycine, serine and threonine metabolism	ko00260	66	576	0.543624	Cluster-31803.27355|Cluster-31803.103109|Cluster-31803.60732|Cluster-31803.87685|Cluster-31803.95028|Cluster-31803.96101|Cluster-31803.53357|Cluster-31803.74213|Cluster-31803.87277|Cluster-31803.95668|Cluster-31803.15234|Cluster-31803.56355|Cluster-31803.70213|Cluster-31803.46868|Cluster-31803.50422|Cluster-31803.52857|Cluster-31803.34692|Cluster-31803.93637|Cluster-31803.14208|Cluster-31803.4414…
Amino sugar and nucleotide sugar metabolism	ko00520	59	514	0.576372	Cluster-31803.61982|Cluster-31803.56568|Cluster-31803.39333|Cluster-31803.82396|Cluster-31803.38023|Cluster-31803.77420|Cluster-31803.60736|Cluster-31803.62343|Cluster-31803.49027|Cluster-31803.57027|Cluster-31803.56174|Cluster-31803.28327|Cluster-31803.70321|Cluster-31803.77055|Cluster-31803.40308|Cluster-31803.74085|Cluster-31803.39773|Cluster-31803.36745|Cluster-31803.97154|Cluster-31803.55392…
Monobactam biosynthesis	ko00261	14	101	0.608381	Cluster-31803.74229|Cluster-31803.34692|Cluster-31803.74622|Cluster-31803.75274|Cluster-31803.74621|Cluster-31803.14220|Cluster-31803.87277|Cluster-31803.76283|Cluster-31803.74213|Cluster-31803.28029|Cluster-31803.74120|Cluster-31803.50592|Cluster-31803.15059|Cluster-31803.46083
RNA degradation	ko03018	87	797	0.661855	Cluster-31803.47327|Cluster-31803.21103|Cluster-31803.113569|Cluster-31803.47328|Cluster-31803.65155|Cluster-31803.32955|Cluster-31803.97141|Cluster-31803.48921|Cluster-31803.58017|Cluster-31803.68523|Cluster-31803.54203|Cluster-31803.41545|Cluster-31803.84327|Cluster-31803.51507|Cluster-31803.47252|Cluster-31803.81204|Cluster-31803.41553|Cluster-31803.47331|Cluster-31803.53785|Cluster-31803.6734…
Glycosphingolipid biosynthesis - globo series	ko00603	11	78	0.661855	Cluster-31803.74520|Cluster-31803.105589|Cluster-31803.39389|Cluster-31803.49027|Cluster-31803.79360|Cluster-31803.40129|Cluster-31803.40126|Cluster-31803.39390|Cluster-31803.26734|Cluster-31803.40122|Cluster-31803.26736
Arginine and proline metabolism	ko00330	57	516	0.767637	Cluster-31803.35565|Cluster-31803.100683|Cluster-31803.100682|Cluster-31803.42747|Cluster-31803.42530|Cluster-31803.67791|Cluster-31803.102987|Cluster-31803.83099|Cluster-31803.76044|Cluster-31803.4633|Cluster-31803.76049|Cluster-31803.56338|Cluster-31803.43979|Cluster-31803.73131|Cluster-31803.64425|Cluster-31803.87709|Cluster-31803.80030|Cluster-31803.45341|Cluster-31803.76043|Cluster-31803.638…
Alanine, aspartate and glutamate metabolism	ko00250	67	619	0.819482	Cluster-31803.103109|Cluster-31803.56568|Cluster-31803.60124|Cluster-31803.95028|Cluster-31803.76460|Cluster-31803.111935|Cluster-31803.61457|Cluster-31803.74487|Cluster-31803.60736|Cluster-31803.4633|Cluster-31803.108301|Cluster-31803.64921|Cluster-31803.65658|Cluster-31803.45783|Cluster-31803.87685|Cluster-31803.63279|Cluster-31803.60112|Cluster-31803.60111|Cluster-31803.60133|Cluster-31803.570…
Folate biosynthesis	ko00790	22	187	0.837284	Cluster-31803.84480|Cluster-31803.98105|Cluster-31803.2404|Cluster-31803.45781|Cluster-31803.3611|Cluster-31803.43757|Cluster-31803.35713|Cluster-31803.56805|Cluster-31803.92332|Cluster-31803.35396|Cluster-31803.21055|Cluster-31803.43869|Cluster-31803.76765|Cluster-31803.111959|Cluster-31803.62631|Cluster-31803.111955|Cluster-31803.18203|Cluster-31803.89828|Cluster-31803.36473|Cluster-31803.35694…
Glyoxylate and dicarboxylate metabolism	ko00630	68	636	0.862163	Cluster-31803.53447|Cluster-31803.27355|Cluster-31803.103109|Cluster-31803.56461|Cluster-31803.15234|Cluster-31803.111935|Cluster-31803.65854|Cluster-31803.61457|Cluster-31803.65870|Cluster-31803.55790|Cluster-31803.48843|Cluster-31803.52148|Cluster-31803.59264|Cluster-31803.68418|Cluster-31803.48845|Cluster-31803.47773|Cluster-31803.54626|Cluster-31803.32484|Cluster-31803.54625|Cluster-31803.678…
Non-homologous end-joining	ko03450	12	97	0.888127	Cluster-31803.98198|Cluster-31803.53560|Cluster-31803.55978|Cluster-31803.52776|Cluster-31803.34800|Cluster-31803.52773|Cluster-31803.75033|Cluster-31803.33716|Cluster-31803.41308|Cluster-31803.41307|Cluster-31803.23261|Cluster-31803.88895
Plant hormone signal transduction	ko04075	79	753	0.896255	Cluster-31803.70761|Cluster-31803.84979|Cluster-31803.61720|Cluster-31803.82413|Cluster-31803.39799|Cluster-31803.61300|Cluster-31803.84973|Cluster-31803.72298|Cluster-31803.29516|Cluster-31803.88831|Cluster-31803.84977|Cluster-31803.84975|Cluster-31803.65957|Cluster-31803.60997|Cluster-31803.54272|Cluster-31803.103856|Cluster-31803.36315|Cluster-31803.69427|Cluster-31803.73617|Cluster-31803.7626…
Carotenoid biosynthesis	ko00906	15	127	0.896255	Cluster-31803.85896|Cluster-31803.47963|Cluster-31803.18551|Cluster-31803.86748|Cluster-31803.66896|Cluster-31803.58792|Cluster-31803.72313|Cluster-31803.98347|Cluster-31803.45992|Cluster-31803.58784|Cluster-31803.73950|Cluster-31803.91893|Cluster-31803.95137|Cluster-31803.41637|Cluster-31803.80538
Glycerolipid metabolism	ko00561	53	498	0.896255	Cluster-31803.27355|Cluster-31803.100683|Cluster-31803.100682|Cluster-31803.105589|Cluster-31803.81421|Cluster-31803.56338|Cluster-31803.95668|Cluster-31803.30319|Cluster-31803.14562|Cluster-31803.101644|Cluster-31803.26734|Cluster-31803.26736|Cluster-31803.39390|Cluster-31803.17667|Cluster-31803.75910|Cluster-31803.75729|Cluster-31803.35245|Cluster-31803.39836|Cluster-31803.27167|Cluster-31803.4…
mRNA surveillance pathway	ko03015	70	679	1	Cluster-31803.65002|Cluster-31803.82378|Cluster-31803.32916|Cluster-31803.19616|Cluster-31803.47653|Cluster-31803.39351|Cluster-31803.19752|Cluster-31803.85619|Cluster-31803.87787|Cluster-31803.42832|Cluster-31803.32917|Cluster-31803.72807|Cluster-31803.75108|Cluster-31803.92818|Cluster-31803.29376|Cluster-31803.62626|Cluster-31803.60410|Cluster-31803.62624|Cluster-31803.50598|Cluster-31803.74511…
Sulfur relay system	ko04122	15	134	1	Cluster-31803.21055|Cluster-31803.84985|Cluster-31803.6414|Cluster-31803.75323|Cluster-31803.66743|Cluster-31803.89597|Cluster-31803.25470|Cluster-31803.66744|Cluster-31803.97255|Cluster-31803.66746|Cluster-31803.33623|Cluster-31803.43869|Cluster-31803.62631|Cluster-31803.82312|Cluster-31803.46897
Thiamine metabolism	ko00730	19	175	1	Cluster-31803.68096|Cluster-31803.74412|Cluster-31803.51335|Cluster-31803.6414|Cluster-31803.41761|Cluster-31803.50120|Cluster-31803.51301|Cluster-31803.89597|Cluster-31803.54647|Cluster-31803.39082|Cluster-31803.55601|Cluster-31803.33900|Cluster-31803.81893|Cluster-31803.75426|Cluster-31803.75151|Cluster-31803.27433|Cluster-31803.82679|Cluster-31803.53252|Cluster-31803.32871
Glycerophospholipid metabolism	ko00564	53	514	1	Cluster-31803.78206|Cluster-31803.58466|Cluster-31803.74211|Cluster-31803.74176|Cluster-31803.101644|Cluster-31803.72902|Cluster-31803.98013|Cluster-31803.14562|Cluster-31803.70448|Cluster-31803.58627|Cluster-31803.86473|Cluster-31803.56008|Cluster-31803.49190|Cluster-31803.68745|Cluster-31803.17667|Cluster-31803.75729|Cluster-31803.14558|Cluster-31803.69189|Cluster-31803.69188|Cluster-31803.9124…
Betalain biosynthesis	ko00965	5	40	1	Cluster-31803.64762|Cluster-31803.104953|Cluster-31803.77359|Cluster-31803.17958|Cluster-31803.64767
Other glycan degradation	ko00511	12	108	1	Cluster-31803.51607|Cluster-31803.55509|Cluster-31803.62483|Cluster-31803.55513|Cluster-31803.99180|Cluster-31803.58728|Cluster-31803.55522|Cluster-31803.49027|Cluster-31803.55526|Cluster-31803.62741|Cluster-31803.55480|Cluster-31803.60629
Lysine biosynthesis	ko00300	14	131	1	Cluster-31803.44797|Cluster-31803.74229|Cluster-31803.74213|Cluster-31803.34692|Cluster-31803.75274|Cluster-31803.14220|Cluster-31803.87277|Cluster-31803.76283|Cluster-31803.53074|Cluster-31803.74120|Cluster-31803.73224|Cluster-31803.50592|Cluster-31803.15059|Cluster-31803.46083
Fatty acid elongation	ko00062	12	116	1	Cluster-31803.35106|Cluster-31803.51076|Cluster-31803.105767|Cluster-31803.53550|Cluster-31803.53552|Cluster-31803.100992|Cluster-31803.30170|Cluster-31803.25955|Cluster-31803.88945|Cluster-31803.93264|Cluster-31803.30181|Cluster-31803.26653
beta-Alanine metabolism	ko00410	35	352	1	Cluster-31803.43224|Cluster-31803.100682|Cluster-31803.26375|Cluster-31803.83099|Cluster-31803.100683|Cluster-31803.87720|Cluster-31803.56338|Cluster-31803.43979|Cluster-11933.1|Cluster-31803.65658|Cluster-31803.42817|Cluster-31803.28049|Cluster-31803.6933|Cluster-31803.100675|Cluster-31803.73014|Cluster-31803.73013|Cluster-31803.44148|Cluster-31803.53815|Cluster-31803.45051|Cluster-31803.21524|C…
Histidine metabolism	ko00340	20	201	1	Cluster-31803.69154|Cluster-31803.100683|Cluster-31803.100682|Cluster-31803.84494|Cluster-31803.42602|Cluster-31803.100675|Cluster-31803.73014|Cluster-31803.91499|Cluster-31803.80579|Cluster-31803.21980|Cluster-31803.4396|Cluster-31803.73013|Cluster-31803.56338|Cluster-31803.4395|Cluster-31803.104943|Cluster-31803.45051|Cluster-31803.56322|Cluster-31803.65789|Cluster-31803.93507|Cluster-31803.339…
Ubiquitin mediated proteolysis	ko04120	96	984	1	Cluster-31803.81979|Cluster-31803.76446|Cluster-31803.24059|Cluster-31803.81975|Cluster-31803.99487|Cluster-31803.84438|Cluster-31803.28958|Cluster-31803.34838|Cluster-31803.70259|Cluster-31803.56221|Cluster-31803.79206|Cluster-31803.71678|Cluster-31803.78787|Cluster-31803.55993|Cluster-31803.55885|Cluster-31803.21959|Cluster-31803.36092|Cluster-31803.48536|Cluster-31803.23771|Cluster-31803.41225…
Starch and sucrose metabolism	ko00500	67	689	1	Cluster-31803.62982|Cluster-31803.52457|Cluster-31803.60933|Cluster-31803.70765|Cluster-31803.82396|Cluster-31803.92037|Cluster-31803.80093|Cluster-31803.30158|Cluster-31803.73534|Cluster-31803.45307|Cluster-31803.27975|Cluster-31803.70321|Cluster-31803.85838|Cluster-31803.86464|Cluster-31803.40308|Cluster-31803.30157|Cluster-31803.39773|Cluster-31803.38184|Cluster-31803.42447|Cluster-31803.42222…
Cysteine and methionine metabolism	ko00270	57	589	1	Cluster-31803.87685|Cluster-31803.95028|Cluster-31803.65854|Cluster-31803.34738|Cluster-31803.107236|Cluster-31803.4633|Cluster-31803.67797|Cluster-31803.87277|Cluster-31803.38779|Cluster-31803.70686|Cluster-31803.59596|Cluster-31803.82312|Cluster-31803.100619|Cluster-31803.55676|Cluster-31803.17660|Cluster-31803.97442|Cluster-31803.102410|Cluster-31803.34692|Cluster-31803.80838|Cluster-31803.441…
Pyruvate metabolism	ko00620	84	873	1	Cluster-31803.78466|Cluster-31803.70349|Cluster-31803.100682|Cluster-31803.48845|Cluster-31803.47086|Cluster-32103.0|Cluster-31803.65854|Cluster-31803.47955|Cluster-31803.107236|Cluster-31803.50028|Cluster-31803.100683|Cluster-31803.92653|Cluster-31803.55790|Cluster-31803.48843|Cluster-31803.56338|Cluster-31803.2942|Cluster-31803.48838|Cluster-31803.10682|Cluster-31803.81623|Cluster-31803.74251|C…
Ubiquinone and other terpenoid-quinone biosynthesis	ko00130	25	261	1	Cluster-31803.78995|Cluster-31803.102985|Cluster-31803.86056|Cluster-31803.60581|Cluster-31803.13938|Cluster-31803.51238|Cluster-31803.8012|Cluster-31803.35995|Cluster-31803.44719|Cluster-31803.51236|Cluster-31803.32849|Cluster-31803.33891|Cluster-31803.68484|Cluster-31803.38034|Cluster-31803.92241|Cluster-31803.8013|Cluster-31803.77996|Cluster-31803.93926|Cluster-31803.64628|Cluster-31803.7104|C…
Cutin, suberine and wax biosynthesis	ko00073	2	19	1	Cluster-31803.26337|Cluster-31803.53163
Other types of O-glycan biosynthesis	ko00514	2	21	1	Cluster-31803.71987|Cluster-31803.58572
Arachidonic acid metabolism	ko00590	17	187	1	Cluster-31803.87621|Cluster-31803.28802|Cluster-31803.30298|Cluster-31803.47005|Cluster-31803.49353|Cluster-31803.80141|Cluster-31803.41583|Cluster-31803.100547|Cluster-31803.83927|Cluster-31803.25714|Cluster-31803.56095|Cluster-31803.61936|Cluster-31803.14441|Cluster-31803.35245|Cluster-31803.36278|Cluster-31803.68762|Cluster-31803.33936
Limonene and pinene degradation	ko00903	6	68	1	Cluster-31803.100683|Cluster-31803.100682|Cluster-31803.100675|Cluster-31803.56338|Cluster-31803.104943|Cluster-31803.56322
Lysine degradation	ko00310	24	264	1	Cluster-31803.37670|Cluster-31803.100682|Cluster-31803.54525|Cluster-31803.54528|Cluster-31803.100683|Cluster-31803.13811|Cluster-31803.56338|Cluster-31803.71907|Cluster-31803.95889|Cluster-31803.44566|Cluster-31803.109079|Cluster-31803.36584|Cluster-31803.36856|Cluster-31803.100675|Cluster-31803.104943|Cluster-31803.50817|Cluster-31803.56322|Cluster-31803.20181|Cluster-31803.61263|Cluster-31803.…
Glycosphingolipid biosynthesis - ganglio series	ko00604	3	35	1	Cluster-31803.55480|Cluster-31803.62741|Cluster-31803.49027
Tropane, piperidine and pyridine alkaloid biosynthesis	ko00960	12	138	1	Cluster-31803.108427|Cluster-31803.80579|Cluster-31803.80907|Cluster-31803.103836|Cluster-31803.4633|Cluster-31803.103830|Cluster-31803.59763|Cluster-31803.44148|Cluster-31803.93507|Cluster-31803.52420|Cluster-31803.21980|Cluster-31803.6933
Cell cycle - Caulobacter	ko04112	13	150	1	Cluster-31803.81008|Cluster-31803.162|Cluster-31803.34597|Cluster-31803.88414|Cluster-31803.67446|Cluster-31803.74051|Cluster-31803.67444|Cluster-31803.67445|Cluster-31803.71841|Cluster-31803.76772|Cluster-31803.56845|Cluster-31803.69227|Cluster-31803.69225
Valine, leucine and isoleucine degradation	ko00280	54	595	1	Cluster-31803.51878|Cluster-31803.100683|Cluster-31803.100682|Cluster-31803.87685|Cluster-31803.74583|Cluster-31803.95028|Cluster-31803.49790|Cluster-31803.35260|Cluster-31803.41072|Cluster-31803.56338|Cluster-31803.40765|Cluster-11933.1|Cluster-31803.109121|Cluster-31803.69758|Cluster-31803.69759|Cluster-31803.42817|Cluster-31803.28049|Cluster-31803.87696|Cluster-31803.58020|Cluster-31803.59504|…
SNARE interactions in vesicular transport	ko04130	9	109	1	Cluster-31803.30114|Cluster-31803.31691|Cluster-31803.51366|Cluster-31803.99298|Cluster-31803.88265|Cluster-31803.75104|Cluster-31803.50456|Cluster-31803.23089|Cluster-31803.84830
Lipoic acid metabolism	ko00785	3	39	1	Cluster-31803.95982|Cluster-31803.82269|Cluster-31803.81904
Glycosaminoglycan degradation	ko00531	3	39	1	Cluster-31803.55480|Cluster-31803.62741|Cluster-31803.49027
Tyrosine metabolism	ko00350	21	244	1	Cluster-31803.108427|Cluster-31803.80579|Cluster-31803.13938|Cluster-31803.80907|Cluster-31803.86056|Cluster-31803.22079|Cluster-31803.54338|Cluster-31803.104953|Cluster-31803.4633|Cluster-31803.103830|Cluster-31803.60022|Cluster-31803.59748|Cluster-31803.96361|Cluster-31803.59750|Cluster-31803.96193|Cluster-31803.5768|Cluster-31803.93507|Cluster-31803.52420|Cluster-31803.21980|Cluster-31803.4414…
Taurine and hypotaurine metabolism	ko00430	7	90	1	Cluster-31803.30298|Cluster-31803.47005|Cluster-31803.60168|Cluster-31803.49353|Cluster-31803.65658|Cluster-31803.45628|Cluster-31803.37069
Glutathione metabolism	ko00480	45	520	1	Cluster-31803.100547|Cluster-31803.47005|Cluster-31803.14441|Cluster-31803.36843|Cluster-31803.49353|Cluster-31803.36109|Cluster-31803.58439|Cluster-31803.38036|Cluster-31803.45411|Cluster-31803.19147|Cluster-31803.105395|Cluster-31803.60778|Cluster-31803.86629|Cluster-31803.41782|Cluster-31803.41781|Cluster-31803.41780|Cluster-31803.61936|Cluster-31803.62671|Cluster-23603.1|Cluster-31803.69381|C…
Citrate cycle (TCA cycle)	ko00020	51	588	1	Cluster-31803.53447|Cluster-31803.78466|Cluster-31803.54525|Cluster-31803.54528|Cluster-31803.65870|Cluster-31803.50028|Cluster-31803.43646|Cluster-31803.94243|Cluster-31803.47773|Cluster-31803.77030|Cluster-31803.56239|Cluster-31803.26879|Cluster-31803.73883|Cluster-31803.60778|Cluster-31803.55391|Cluster-31803.26875|Cluster-31803.85078|Cluster-31803.44613|Cluster-31803.112684|Cluster-31803.4708…
Protein export	ko03060	27	324	1	Cluster-31803.52757|Cluster-31803.95247|Cluster-31803.21829|Cluster-31803.89437|Cluster-31803.66941|Cluster-31803.27568|Cluster-31803.83414|Cluster-31803.89325|Cluster-31803.54204|Cluster-31803.54205|Cluster-31803.49552|Cluster-31803.17066|Cluster-31803.42735|Cluster-31803.3334|Cluster-31803.62123|Cluster-31803.76709|Cluster-31803.23938|Cluster-31803.111272|Cluster-31803.76398|Cluster-31803.71123…
Isoquinoline alkaloid biosynthesis	ko00950	8	107	1	Cluster-31803.108427|Cluster-31803.80907|Cluster-31803.22079|Cluster-31803.44148|Cluster-31803.103830|Cluster-31803.4633|Cluster-31803.52420|Cluster-31803.6933
ABC transporters	ko02010	31	371	1	Cluster-31803.29806|Cluster-31803.50789|Cluster-31803.59812|Cluster-31803.74702|Cluster-31803.50786|Cluster-31803.47639|Cluster-31803.47638|Cluster-31803.29985|Cluster-31803.83562|Cluster-31803.60676|Cluster-31803.3540|Cluster-31803.109893|Cluster-31803.64171|Cluster-31803.101309|Cluster-31803.44995|Cluster-31803.71578|Cluster-31803.70663|Cluster-31803.64438|Cluster-31803.73802|Cluster-31803.7380…
Pantothenate and CoA biosynthesis	ko00770	24	293	1	Cluster-31803.80217|Cluster-31803.43224|Cluster-31803.749|Cluster-31803.26375|Cluster-31803.102981|Cluster-31803.52160|Cluster-31803.55421|Cluster-31803.44468|Cluster-31803.44467|Cluster-31803.33166|Cluster-31803.53815|Cluster-31803.102771|Cluster-31803.81088|Cluster-31803.78572|Cluster-31803.21524|Cluster-31803.72070|Cluster-31803.49888|Cluster-31803.57493|Cluster-31803.56672|Cluster-31803.17637…
Phenylalanine metabolism	ko00360	14	179	1	Cluster-31803.108427|Cluster-31803.80579|Cluster-31803.13938|Cluster-31803.80907|Cluster-31803.86056|Cluster-31803.4633|Cluster-31803.103830|Cluster-31803.44148|Cluster-31803.12215|Cluster-31803.93507|Cluster-31803.52420|Cluster-31803.21980|Cluster-31803.93926|Cluster-31803.6933
Spliceosome	ko03040	135	1501	1	Cluster-31803.102090|Cluster-31803.78324|Cluster-31803.54529|Cluster-31803.79234|Cluster-31803.96864|Cluster-31803.80373|Cluster-31803.46430|Cluster-31803.39067|Cluster-31803.46508|Cluster-31803.52691|Cluster-31803.15394|Cluster-31803.96775|Cluster-31803.60596|Cluster-31803.40807|Cluster-31803.91938|Cluster-31803.49491|Cluster-31803.51507|Cluster-31803.56434|Cluster-31803.54064|Cluster-31803.4490…
Fructose and mannose metabolism	ko00051	32	384	1	Cluster-31803.82396|Cluster-31803.38023|Cluster-31803.76547|Cluster-31803.113569|Cluster-31803.56174|Cluster-31803.65032|Cluster-31803.39773|Cluster-21479.0|Cluster-34167.0|Cluster-31803.29374|Cluster-31803.55796|Cluster-31803.54985|Cluster-31803.90832|Cluster-31803.47456|Cluster-31803.54504|Cluster-31803.59522|Cluster-31803.47252|Cluster-31803.54500|Cluster-31803.36919|Cluster-31803.83087|Cluste…
Riboflavin metabolism	ko00740	5	73	1	Cluster-31803.10652|Cluster-31803.69570|Cluster-31803.38506|Cluster-31803.89733|Cluster-31803.31954
Selenocompound metabolism	ko00450	21	263	1	Cluster-31803.82873|Cluster-31803.86325|Cluster-31803.95744|Cluster-31803.74622|Cluster-31803.35901|Cluster-31803.80134|Cluster-31803.74621|Cluster-31803.42304|Cluster-31803.67797|Cluster-31803.67801|Cluster-31803.48724|Cluster-31803.82553|Cluster-31803.26342|Cluster-31803.28029|Cluster-31803.67803|Cluster-31803.50601|Cluster-31803.96712|Cluster-31803.35897|Cluster-31803.60808|Cluster-31803.58992…
Steroid biosynthesis	ko00100	16	207	1	Cluster-31803.79788|Cluster-31803.72546|Cluster-31803.50941|Cluster-31803.50171|Cluster-31803.50412|Cluster-31803.79793|Cluster-31803.50161|Cluster-31803.64421|Cluster-31803.60727|Cluster-31803.60720|Cluster-31803.54562|Cluster-31803.56945|Cluster-31803.54559|Cluster-31803.35245|Cluster-31803.68762|Cluster-31803.54513
Peroxisome	ko04146	69	799	1	Cluster-31803.67517|Cluster-31803.103109|Cluster-31803.62585|Cluster-31803.74580|Cluster-31803.37707|Cluster-31803.66466|Cluster-31803.41909|Cluster-31803.78738|Cluster-31803.87184|Cluster-31803.70360|Cluster-31803.70363|Cluster-31803.2715|Cluster-31803.74111|Cluster-31803.57794|Cluster-31803.66726|Cluster-31803.62255|Cluster-31803.46684|Cluster-31803.74112|Cluster-31803.64582|Cluster-31803.60778…
Inositol phosphate metabolism	ko00562	30	373	1	Cluster-31803.50966|Cluster-31803.74669|Cluster-31803.74040|Cluster-31803.62015|Cluster-31803.77039|Cluster-31803.42817|Cluster-31803.43432|Cluster-31803.97796|Cluster-31803.4396|Cluster-31803.70701|Cluster-31803.4395|Cluster-31803.28674|Cluster-31803.51292|Cluster-31803.69360|Cluster-31803.63196|Cluster-31803.69356|Cluster-31803.74674|Cluster-31803.54161|Cluster-31803.54162|Cluster-31803.49154|C…
Circadian rhythm - plant	ko04712	10	141	1	Cluster-31803.43629|Cluster-31803.43628|Cluster-31803.92458|Cluster-31803.55748|Cluster-31803.40942|Cluster-31803.95508|Cluster-31803.46989|Cluster-31803.33649|Cluster-31803.49574|Cluster-31803.3193
Vitamin B6 metabolism	ko00750	5	79	1	Cluster-31803.64395|Cluster-31803.79154|Cluster-31803.83479|Cluster-31803.38299|Cluster-31803.30056
Valine, leucine and isoleucine biosynthesis	ko00290	13	179	1	Cluster-31803.70349|Cluster-31803.21153|Cluster-31803.70350|Cluster-31803.70340|Cluster-31803.92653|Cluster-31803.37482|Cluster-31803.92655|Cluster-31803.72070|Cluster-31803.52160|Cluster-31803.70337|Cluster-31803.20903|Cluster-31803.55421|Cluster-31803.20901
Purine metabolism	ko00230	134	1524	1	Cluster-31803.59817|Cluster-31803.39570|Cluster-31803.20751|Cluster-31803.80764|Cluster-31803.28029|Cluster-31803.61399|Cluster-31803.74251|Cluster-31803.63100|Cluster-31803.59894|Cluster-31803.55932|Cluster-31803.61392|Cluster-31803.61793|Cluster-31803.105432|Cluster-31803.74398|Cluster-31803.98970|Cluster-31803.81204|Cluster-31803.41553|Cluster-31803.86374|Cluster-31803.36858|Cluster-31803.4032…
Fatty acid degradation	ko00071	32	402	1	Cluster-31803.100683|Cluster-31803.100682|Cluster-31803.54338|Cluster-31803.39477|Cluster-31803.56338|Cluster-11933.1|Cluster-31803.59750|Cluster-31803.62255|Cluster-31803.60022|Cluster-31803.74112|Cluster-31803.74111|Cluster-31803.57153|Cluster-31803.57156|Cluster-31803.56570|Cluster-31803.54118|Cluster-31803.60797|Cluster-31803.23280|Cluster-31803.37395|Cluster-31803.61150|Cluster-31803.66343|C…
Biosynthesis of unsaturated fatty acids	ko01040	20	264	1	Cluster-31803.30170|Cluster-31803.111495|Cluster-31803.66343|Cluster-31803.73844|Cluster-31803.74112|Cluster-31803.37395|Cluster-31803.50742|Cluster-31803.100992|Cluster-31803.109121|Cluster-31803.54118|Cluster-31803.25955|Cluster-31803.106059|Cluster-31803.66726|Cluster-31803.73842|Cluster-31803.93264|Cluster-31803.30181|Cluster-31803.73850|Cluster-31803.61150|Cluster-31803.26653|Cluster-31803.7…
RNA transport	ko03013	94	1108	1	Cluster-31803.43857|Cluster-31803.48921|Cluster-31803.46508|Cluster-31803.56416|Cluster-31803.16823|Cluster-31803.16255|Cluster-31803.77508|Cluster-31803.13774|Cluster-31803.66053|Cluster-31803.40357|Cluster-31803.48208|Cluster-31803.44595|Cluster-31803.44594|Cluster-31803.66294|Cluster-31803.75967|Cluster-31803.14982|Cluster-31803.44661|Cluster-31803.56397|Cluster-31803.36092|Cluster-31803.55881…
Pentose and glucuronate interconversions	ko00040	18	250	1	Cluster-31803.100683|Cluster-31803.100682|Cluster-31803.36919|Cluster-31803.89190|Cluster-31803.22617|Cluster-31803.77056|Cluster-31803.100675|Cluster-31803.81524|Cluster-31803.81521|Cluster-31803.75905|Cluster-31803.56302|Cluster-31803.56338|Cluster-31803.77055|Cluster-31803.104943|Cluster-31803.56322|Cluster-31803.47124|Cluster-31803.55796|Cluster-31803.82714
Ether lipid metabolism	ko00565	7	115	1	Cluster-31803.15737|Cluster-31803.14558|Cluster-31803.45761|Cluster-31803.93341|Cluster-31803.14562|Cluster-31803.35245|Cluster-31803.68762
Protein processing in endoplasmic reticulum	ko04141	109	1294	1	Cluster-31803.39478|Cluster-31803.9646|Cluster-31803.62113|Cluster-31803.62112|Cluster-31803.66126|Cluster-31803.66120|Cluster-31803.69826|Cluster-31803.6387|Cluster-31803.39067|Cluster-31803.83414|Cluster-31803.76326|Cluster-31803.56821|Cluster-31803.61485|Cluster-31803.70008|Cluster-31803.23377|Cluster-31803.77508|Cluster-31803.87533|Cluster-31803.87534|Cluster-31803.84098|Cluster-31803.62108|C…
C5-Branched dibasic acid metabolism	ko00660	2	48	1	Cluster-31803.21153|Cluster-31803.37482
Plant-pathogen interaction	ko04626	32	430	1	Cluster-31803.49291|Cluster-31803.3341|Cluster-31803.58271|Cluster-31803.30598|Cluster-31803.74237|Cluster-31803.61195|Cluster-31803.71878|Cluster-31803.52000|Cluster-31803.91882|Cluster-31803.6387|Cluster-31803.64313|Cluster-31803.30597|Cluster-31803.15410|Cluster-31803.28391|Cluster-31803.49900|Cluster-31803.40845|Cluster-31803.109407|Cluster-31803.44509|Cluster-31803.56821|Cluster-31803.66059|…
Sulfur metabolism	ko00920	19	275	1	Cluster-31803.55676|Cluster-31803.28029|Cluster-31803.70106|Cluster-31803.59812|Cluster-31803.102410|Cluster-31803.94220|Cluster-31803.80838|Cluster-31803.100619|Cluster-31803.74621|Cluster-31803.74622|Cluster-31803.28674|Cluster-31803.59596|Cluster-31803.31437|Cluster-31803.3540|Cluster-31803.82312|Cluster-31803.63242|Cluster-31803.33981|Cluster-31803.94808|Cluster-31803.97442
Photosynthesis - antenna proteins	ko00196	4	80	1	Cluster-31803.42737|Cluster-31803.50036|Cluster-31803.63459|Cluster-31803.56889
Phenylalanine, tyrosine and tryptophan biosynthesis	ko00400	23	325	1	Cluster-31803.80579|Cluster-31803.12530|Cluster-31803.93507|Cluster-31803.53357|Cluster-31803.4633|Cluster-31803.46928|Cluster-31803.46929|Cluster-31803.90021|Cluster-31803.90022|Cluster-31803.50422|Cluster-31803.7810|Cluster-31803.84225|Cluster-31803.21980|Cluster-31803.55216|Cluster-31803.52420|Cluster-31803.22107|Cluster-31803.12375|Cluster-31803.108427|Cluster-31803.110298|Cluster-31803.80907…
Linoleic acid metabolism	ko00591	2	50	1	Cluster-31803.35245|Cluster-31803.68762
alpha-Linolenic acid metabolism	ko00592	14	216	1	Cluster-31803.66343|Cluster-31803.50742|Cluster-31803.35245|Cluster-31803.60169|Cluster-31803.109121|Cluster-31803.54118|Cluster-31803.106059|Cluster-31803.66726|Cluster-31803.23280|Cluster-31803.37395|Cluster-31803.74112|Cluster-31803.61150|Cluster-31803.68762|Cluster-31803.74111
Phenylpropanoid biosynthesis	ko00940	4	82	1	Cluster-11421.5|Cluster-31803.68240|Cluster-31803.38967|Cluster-31803.93926
Butanoate metabolism	ko00650	13	204	1	Cluster-31803.60124|Cluster-31803.60111|Cluster-31803.60168|Cluster-31803.60122|Cluster-31803.60121|Cluster-31803.37069|Cluster-31803.56349|Cluster-31803.65658|Cluster-31803.12215|Cluster-31803.41072|Cluster-31803.45628|Cluster-31803.60133|Cluster-31803.60112
Sesquiterpenoid and triterpenoid biosynthesis	ko00909	1	32	1	Cluster-31803.72546
One carbon pool by folate	ko00670	12	192	1	Cluster-31803.57060|Cluster-31803.95639|Cluster-31803.109018|Cluster-31803.67797|Cluster-31803.9247|Cluster-31803.56805|Cluster-31803.15234|Cluster-31803.67803|Cluster-31803.41454|Cluster-31803.24541|Cluster-31803.45781|Cluster-31803.67801
Propanoate metabolism	ko00640	37	497	1	Cluster-31803.51878|Cluster-31803.2942|Cluster-31803.49790|Cluster-31803.107236|Cluster-31803.87720|Cluster-11933.1|Cluster-32103.0|Cluster-31803.77030|Cluster-31803.42817|Cluster-31803.63244|Cluster-31803.28049|Cluster-31803.58270|Cluster-31803.100315|Cluster-31803.47517|Cluster-31803.25560|Cluster-31803.80753|Cluster-31803.55153|Cluster-31803.50388|Cluster-31803.56920|Cluster-31803.59298|Cluste…
Phagosome	ko04145	40	552	1	Cluster-31803.54520|Cluster-31803.43852|Cluster-31803.95247|Cluster-31803.99298|Cluster-31803.45208|Cluster-31803.58810|Cluster-31803.74339|Cluster-31803.65932|Cluster-31803.76526|Cluster-31803.54235|Cluster-31803.33145|Cluster-31803.33147|Cluster-31803.31160|Cluster-31803.33253|Cluster-31803.54237|Cluster-17052.0|Cluster-31803.66758|Cluster-31803.54243|Cluster-31803.47352|Cluster-31803.31691|Clu…
Glycosylphosphatidylinositol(GPI)-anchor biosynthesis	ko00563	4	93	1	Cluster-31803.26436|Cluster-31803.71156|Cluster-31803.95342|Cluster-31803.42958
Ascorbate and aldarate metabolism	ko00053	14	234	1	Cluster-31803.100683|Cluster-31803.100682|Cluster-31803.62671|Cluster-31803.77056|Cluster-31803.100675|Cluster-31803.77055|Cluster-31803.4396|Cluster-31803.22617|Cluster-31803.56338|Cluster-31803.4395|Cluster-31803.104943|Cluster-31803.56322|Cluster-31803.47124|Cluster-31803.34247
Cyanoamino acid metabolism	ko00460	5	112	1	Cluster-31803.57060|Cluster-31803.49353|Cluster-31803.24541|Cluster-31803.30298|Cluster-31803.47005
Endocytosis	ko04144	76	990	1	Cluster-31803.53110|Cluster-31803.36355|Cluster-31803.60534|Cluster-31803.42870|Cluster-31803.74983|Cluster-31803.20226|Cluster-31803.43381|Cluster-31803.62015|Cluster-31803.54725|Cluster-31803.54724|Cluster-31803.71241|Cluster-31803.73445|Cluster-31803.70033|Cluster-31803.37607|Cluster-31803.87081|Cluster-31803.70038|Cluster-31803.68924|Cluster-31803.58773|Cluster-31803.58925|Cluster-31803.10061…
Tryptophan metabolism	ko00380	10	190	1	Cluster-31803.100683|Cluster-31803.100682|Cluster-31803.100675|Cluster-31803.107177|Cluster-31803.60396|Cluster-31803.56338|Cluster-31803.104943|Cluster-31803.50817|Cluster-31803.56322|Cluster-31803.64582
Biotin metabolism	ko00780	6	138	1	Cluster-31803.99112|Cluster-31803.25379|Cluster-31803.5832|Cluster-31803.20495|Cluster-31803.55727|Cluster-31803.57914
Fatty acid biosynthesis	ko00061	19	326	1	Cluster-31803.57153|Cluster-31803.2942|Cluster-31803.99112|Cluster-31803.57156|Cluster-32103.0|Cluster-31803.25379|Cluster-10482.0|Cluster-31803.56570|Cluster-31803.43847|Cluster-31803.39477|Cluster-31803.73844|Cluster-31803.60797|Cluster-31803.29741|Cluster-31803.73842|Cluster-31803.100315|Cluster-31803.62255|Cluster-31803.73850|Cluster-31803.77912|Cluster-31803.71595
Synthesis and degradation of ketone bodies	ko00072	1	55	1	Cluster-31803.41072
Ribosome biogenesis in eukaryotes	ko03008	65	911	1	Cluster-31803.47272|Cluster-31803.77592|Cluster-31803.14155|Cluster-31803.84219|Cluster-31803.51862|Cluster-31803.43178|Cluster-31803.15882|Cluster-31803.71366|Cluster-31803.77211|Cluster-31803.77212|Cluster-31803.73914|Cluster-31803.75047|Cluster-31803.88877|Cluster-31803.75045|Cluster-31803.86399|Cluster-31803.65155|Cluster-31803.64211|Cluster-31803.75061|Cluster-31803.63360|Cluster-31803.27678…
Aminoacyl-tRNA biosynthesis	ko00970	48	751	1	Cluster-31803.37614|Cluster-31803.76990|Cluster-31803.50640|Cluster-23565.0|Cluster-31803.21828|Cluster-31803.88835|Cluster-31803.95475|Cluster-31803.105641|Cluster-31803.106166|Cluster-31803.83271|Cluster-31803.25068|Cluster-31803.19694|Cluster-31803.38692|Cluster-31803.69893|Cluster-31803.31535|Cluster-31803.98669|Cluster-31803.42161|Cluster-31803.80224|Cluster-31803.27624|Cluster-31803.28936|C…
RNA polymerase	ko03020	20	398	1	Cluster-31803.51718|Cluster-31803.39570|Cluster-31803.101318|Cluster-31803.70090|Cluster-31803.5078|Cluster-31803.78814|Cluster-31803.56517|Cluster-31803.20751|Cluster-31803.60661|Cluster-31803.98839|Cluster-31803.68333|Cluster-31803.68344|Cluster-31803.46794|Cluster-31803.66454|Cluster-31803.54256|Cluster-31803.15178|Cluster-31803.58340|Cluster-31803.73489|Cluster-31803.54257|Cluster-31803.25543
Ribosome	ko03010	82	1493	1	Cluster-31803.34535|Cluster-31803.85792|Cluster-31803.58593|Cluster-31803.53442|Cluster-31803.52735|Cluster-31803.38626|Cluster-31803.71750|Cluster-31803.54611|Cluster-31803.38588|Cluster-31803.60457|Cluster-31803.57049|Cluster-31803.85456|Cluster-31803.4296|Cluster-31803.84755|Cluster-31803.47860|Cluster-31803.53250|Cluster-31803.111038|Cluster-31803.61409|Cluster-31803.11951|Cluster-31803.44996…

## Sheet: KEGG enrichment of 2802 unigene
KEGG enrichment of 2,802 unigenes differentially expressed under both high and low salinity.
KEGG pathway	ID	Input number	Background number	Corrected P-Value	Input
Plant hormone signal transduction	ko04075	38	753	2.43015e-07	Cluster-31803.8356|Cluster-31803.8355|Cluster-31803.8352|Cluster-31803.61313|Cluster-31803.51914|Cluster-31803.104491|Cluster-31803.12439|Cluster-31803.64339|Cluster-31803.55648|Cluster-31803.64337|Cluster-31803.22476|Cluster-31803.58181|Cluster-31803.45016|Cluster-31803.62597|Cluster-31803.41273|Cluster-31803.58184|Cluster-31803.33212|Cluster-31803.58193|Cluster-31803.41620|Cluster-31803.11520|C…
Arginine and proline metabolism	ko00330	26	516	4.17621e-05	Cluster-31803.100681|Cluster-31803.66376|Cluster-31803.66370|Cluster-31803.49048|Cluster-31803.49049|Cluster-31803.38021|Cluster-31803.62110|Cluster-31803.67654|Cluster-31803.63897|Cluster-31803.80012|Cluster-31803.80033|Cluster-31803.49053|Cluster-31803.49054|Cluster-31803.69725|Cluster-31803.96261|Cluster-31803.71444|Cluster-31803.25076|Cluster-31803.58575|Cluster-31803.46041|Cluster-31803.8002…
Glutathione metabolism	ko00480	22	520	0.00215748	Cluster-31803.23447|Cluster-31803.56093|Cluster-31803.58284|Cluster-31803.104346|Cluster-31803.11166|Cluster-31803.11814|Cluster-31803.75630|Cluster-31803.57486|Cluster-31803.33933|Cluster-31803.67472|Cluster-31803.55515|Cluster-31803.89474|Cluster-31803.89473|Cluster-31803.51132|Cluster-31803.89466|Cluster-31803.11152|Cluster-31803.31012|Cluster-31803.44265|Cluster-31803.55633|Cluster-31803.5881…
Betalain biosynthesis	ko00965	6	40	0.00215748	Cluster-31803.50042|Cluster-31803.27098|Cluster-31803.77505|Cluster-31803.66609|Cluster-31803.30226|Cluster-31803.40324
Sulfur metabolism	ko00920	13	275	0.0151589	Cluster-31803.72541|Cluster-31803.41282|Cluster-31803.68971|Cluster-10673.0|Cluster-31803.57703|Cluster-31803.68848|Cluster-31803.84360|Cluster-31803.13557|Cluster-31803.91281|Cluster-31803.80165|Cluster-31803.68972|Cluster-31803.103925|Cluster-31803.83619
Cysteine and methionine metabolism	ko00270	21	589	0.0151589	Cluster-31803.32844|Cluster-31803.39910|Cluster-31803.72541|Cluster-31803.9376|Cluster-31803.58950|Cluster-31803.58815|Cluster-31803.86487|Cluster-31803.12601|Cluster-31803.61450|Cluster-31803.87181|Cluster-31803.57703|Cluster-31803.96261|Cluster-31803.84360|Cluster-31803.45048|Cluster-31803.45041|Cluster-31803.80165|Cluster-31803.57486|Cluster-31803.103925|Cluster-31803.41282|Cluster-31803.71802…
Nitrogen metabolism	ko00910	11	221	0.019026	Cluster-31803.61460|Cluster-31803.104179|Cluster-31803.54201|Cluster-31803.60630|Cluster-31803.54206|Cluster-31803.75774|Cluster-31803.18732|Cluster-31803.98074|Cluster-31803.16787|Cluster-31803.43602|Cluster-31803.18737
Pyruvate metabolism	ko00620	24	873	0.12633	Cluster-31803.100681|Cluster-31803.58575|Cluster-31803.72969|Cluster-31803.87544|Cluster-31803.61450|Cluster-31803.48842|Cluster-31803.80535|Cluster-31803.46432|Cluster-31803.102126|Cluster-31803.51795|Cluster-31803.84320|Cluster-31803.48476|Cluster-31803.48475|Cluster-31803.58950|Cluster-31803.75607|Cluster-31803.70212|Cluster-31803.64139|Cluster-31803.102127|Cluster-31803.75598|Cluster-31803.44…
Zeatin biosynthesis	ko00908	3	30	0.16455	Cluster-31803.21950|Cluster-31803.92510|Cluster-31803.13668
Ascorbate and aldarate metabolism	ko00053	9	234	0.16455	Cluster-31803.64027|Cluster-31803.100681|Cluster-31803.28476|Cluster-31803.58575|Cluster-31803.51867|Cluster-31803.74076|Cluster-31803.31012|Cluster-31803.67865|Cluster-31803.34246
alpha-Linolenic acid metabolism	ko00592	8	216	0.252129	Cluster-31803.103519|Cluster-31803.103514|Cluster-31803.103515|Cluster-31803.57080|Cluster-31803.103521|Cluster-31803.60679|Cluster-31803.70489|Cluster-31803.61151
Arachidonic acid metabolism	ko00590	7	187	0.302983	Cluster-31803.23447|Cluster-31803.89466|Cluster-31803.55515|Cluster-31803.44265|Cluster-31803.89474|Cluster-31803.33933|Cluster-31803.89473
Nicotinate and nicotinamide metabolism	ko00760	7	201	0.381695	Cluster-31803.63672|Cluster-31803.62968|Cluster-31803.39898|Cluster-31803.83601|Cluster-31803.81794|Cluster-31803.53255|Cluster-31803.83598
Carbon fixation in photosynthetic organisms	ko00710	14	561	0.559377	Cluster-31803.48476|Cluster-31803.26513|Cluster-31803.48475|Cluster-31803.58950|Cluster-31803.102126|Cluster-31803.58452|Cluster-31803.43543|Cluster-31803.61450|Cluster-31803.51843|Cluster-31803.57108|Cluster-31803.69560|Cluster-31803.66094|Cluster-31803.64139|Cluster-31803.102127
Sphingolipid metabolism	ko00600	7	243	0.705831	Cluster-31803.15650|Cluster-31803.20332|Cluster-31803.79605|Cluster-31803.58454|Cluster-31803.79356|Cluster-31803.24492|Cluster-31803.31827
Riboflavin metabolism	ko00740	3	73	0.734983	Cluster-31803.49489|Cluster-31803.23541|Cluster-31803.88545
Fatty acid elongation	ko00062	4	116	0.734983	Cluster-31803.48815|Cluster-31803.33877|Cluster-31803.108995|Cluster-31803.48813
Lipoic acid metabolism	ko00785	2	39	0.768249	Cluster-31803.94793|Cluster-31803.52161
Phenylalanine metabolism	ko00360	5	179	0.898286	Cluster-31803.96261|Cluster-31803.69945|Cluster-31803.100296|Cluster-31803.16855|Cluster-31803.69940
Taurine and hypotaurine metabolism	ko00430	3	90	0.908338	Cluster-31803.67927|Cluster-31803.55515|Cluster-31803.44265
Tropane, piperidine and pyridine alkaloid biosynthesis	ko00960	4	138	0.908338	Cluster-31803.96261|Cluster-31803.69945|Cluster-31803.100296|Cluster-31803.69940
Tyrosine metabolism	ko00350	6	244	0.9146	Cluster-31803.100296|Cluster-31803.12456|Cluster-31803.96261|Cluster-31803.69945|Cluster-31803.16855|Cluster-31803.69940
Alanine, aspartate and glutamate metabolism	ko00250	13	619	0.9146	Cluster-31803.75977|Cluster-31803.37541|Cluster-31803.61460|Cluster-31803.25076|Cluster-31803.86487|Cluster-31803.17904|Cluster-31803.19835|Cluster-31803.96261|Cluster-31803.60630|Cluster-31803.37545|Cluster-31803.43602|Cluster-31803.49382|Cluster-31803.17903
Histidine metabolism	ko00340	5	201	0.965223	Cluster-31803.100681|Cluster-31803.69945|Cluster-31803.58575|Cluster-31803.100296|Cluster-31803.69940
Pentose phosphate pathway	ko00030	9	419	0.972298	Cluster-31803.48780|Cluster-31803.68104|Cluster-31803.36885|Cluster-31803.51843|Cluster-31803.56093|Cluster-31803.58284|Cluster-31803.54839|Cluster-31803.67472|Cluster-31803.51132
Ubiquinone and other terpenoid-quinone biosynthesis	ko00130	6	261	0.972298	Cluster-31803.42047|Cluster-31803.79480|Cluster-31803.31440|Cluster-31803.66838|Cluster-31803.107554|Cluster-31803.16855
Inositol phosphate metabolism	ko00562	8	373	0.972298	Cluster-31803.51698|Cluster-31803.28476|Cluster-31803.43543|Cluster-31803.54986|Cluster-31803.42055|Cluster-31803.69560|Cluster-31803.67865|Cluster-31803.49158
Glycolysis / Gluconeogenesis	ko00010	17	896	1	Cluster-31803.100681|Cluster-31803.75598|Cluster-31803.72969|Cluster-31803.43543|Cluster-31803.58575|Cluster-31803.43125|Cluster-31803.57108|Cluster-31803.51843|Cluster-31803.84320|Cluster-31803.80535|Cluster-31803.34582|Cluster-31803.69560|Cluster-31803.66094|Cluster-31803.84756|Cluster-31803.70212|Cluster-31803.44292|Cluster-31803.46432
Porphyrin and chlorophyll metabolism	ko00860	10	501	1	Cluster-31803.13250|Cluster-31803.102604|Cluster-31803.29257|Cluster-31803.73345|Cluster-31803.30218|Cluster-31803.95961|Cluster-31803.42816|Cluster-31803.26525|Cluster-31803.94076|Cluster-31803.26523
Limonene and pinene degradation	ko00903	2	68	1	Cluster-31803.100681|Cluster-31803.58575
Nucleotide excision repair	ko03420	10	515	1	Cluster-31803.65590|Cluster-31803.92758|Cluster-31803.73272|Cluster-31803.44715|Cluster-31803.38596|Cluster-31803.57078|Cluster-31803.39523|Cluster-31803.61247|Cluster-31803.79947|Cluster-31803.74086
Arginine biosynthesis	ko00220	7	348	1	Cluster-31803.94035|Cluster-31803.61460|Cluster-31803.39644|Cluster-31803.38253|Cluster-31803.96261|Cluster-31803.43602|Cluster-31803.49382
Folate biosynthesis	ko00790	4	187	1	Cluster-31803.46206|Cluster-31803.48034|Cluster-31803.18204|Cluster-31803.40059
Glycosphingolipid biosynthesis - globo series	ko00603	2	78	1	Cluster-31803.79605|Cluster-31803.79356
Biotin metabolism	ko00780	3	138	1	Cluster-31803.96839|Cluster-31803.17167|Cluster-31803.96146
Circadian rhythm - plant	ko04712	3	141	1	Cluster-31803.14976|Cluster-31803.23855|Cluster-31803.25575
Propanoate metabolism	ko00640	9	497	1	Cluster-31803.72969|Cluster-31803.34582|Cluster-31803.51795|Cluster-31803.98783|Cluster-31803.84320|Cluster-31803.70212|Cluster-31803.44292|Cluster-31803.55448|Cluster-31803.49158
Glycerolipid metabolism	ko00561	9	498	1	Cluster-31803.100681|Cluster-31803.25127|Cluster-31803.18428|Cluster-31803.86613|Cluster-31803.58575|Cluster-31803.79605|Cluster-31803.79356|Cluster-31803.60213|Cluster-31803.65991
Peroxisome	ko04146	14	799	1	Cluster-31803.54350|Cluster-31803.41891|Cluster-31803.3286|Cluster-31803.28992|Cluster-31803.75781|Cluster-31803.57080|Cluster-31803.41908|Cluster-31803.66877|Cluster-31803.17904|Cluster-31803.17903|Cluster-31803.70489|Cluster-31803.35821|Cluster-31803.67755|Cluster-31803.61151
Selenocompound metabolism	ko00450	5	263	1	Cluster-31803.82867|Cluster-31803.52799|Cluster-31803.12601|Cluster-31803.77001|Cluster-31803.9376
Protein export	ko03060	6	324	1	Cluster-31803.62119|Cluster-31803.75419|Cluster-31803.42092|Cluster-31803.59757|Cluster-31803.69860|Cluster-31803.66440
Phenylalanine, tyrosine and tryptophan biosynthesis	ko00400	6	325	1	Cluster-31803.93837|Cluster-31803.100296|Cluster-31803.96261|Cluster-31803.69945|Cluster-31803.60754|Cluster-31803.69940
Amino sugar and nucleotide sugar metabolism	ko00520	9	514	1	Cluster-31803.43125|Cluster-31803.78911|Cluster-31803.56315|Cluster-31803.42276|Cluster-31803.37541|Cluster-31803.42263|Cluster-31803.37545|Cluster-31803.19835|Cluster-31803.64927
Glyoxylate and dicarboxylate metabolism	ko00630	11	636	1	Cluster-31803.57237|Cluster-31803.48842|Cluster-31803.61460|Cluster-31803.3286|Cluster-31803.61450|Cluster-31803.58950|Cluster-31803.17904|Cluster-31803.17903|Cluster-31803.43602|Cluster-31803.70212|Cluster-31803.56356
Basal transcription factors	ko03022	4	227	1	Cluster-31803.73272|Cluster-31803.79947|Cluster-31803.57078|Cluster-31803.39523
Pantothenate and CoA biosynthesis	ko00770	5	293	1	Cluster-31803.32844|Cluster-31803.104324|Cluster-31803.13532|Cluster-31803.43220|Cluster-31803.84417
Cyanoamino acid metabolism	ko00460	2	112	1	Cluster-31803.55515|Cluster-31803.44265
ABC transporters	ko02010	6	371	1	Cluster-31803.73800|Cluster-10673.0|Cluster-31803.73799|Cluster-31803.35821|Cluster-31803.67755|Cluster-12029.0
Starch and sucrose metabolism	ko00500	11	689	1	Cluster-31803.63583|Cluster-31803.60237|Cluster-31803.43125|Cluster-31803.97449|Cluster-31803.45162|Cluster-31803.16439|Cluster-31803.37759|Cluster-31803.56561|Cluster-31803.52632|Cluster-31803.52636|Cluster-31803.52959
Purine metabolism	ko00230	24	1524	1	Cluster-31803.60619|Cluster-31803.56938|Cluster-31803.56939|Cluster-31803.58068|Cluster-31803.53255|Cluster-31803.46432|Cluster-31803.80729|Cluster-31803.39898|Cluster-31803.75977|Cluster-31803.99556|Cluster-31803.48780|Cluster-31803.49530|Cluster-31803.101567|Cluster-31803.56903|Cluster-31803.61247|Cluster-31803.103328|Cluster-31803.75598|Cluster-31803.31894|Cluster-31803.62588|Cluster-31803.399…
DNA replication	ko03030	7	447	1	Cluster-31803.65590|Cluster-31803.52775|Cluster-31803.38596|Cluster-31803.61247|Cluster-31803.55856|Cluster-31803.72923|Cluster-31803.74086
Mismatch repair	ko03430	5	320	1	Cluster-31803.65590|Cluster-31803.61247|Cluster-31803.38596|Cluster-31803.81665|Cluster-31803.74086
Tryptophan metabolism	ko00380	3	190	1	Cluster-31803.100681|Cluster-31803.58575|Cluster-31803.71459
Carotenoid biosynthesis	ko00906	2	127	1	Cluster-31803.80785|Cluster-31803.51515
Biosynthesis of unsaturated fatty acids	ko01040	4	264	1	Cluster-31803.70489|Cluster-31803.57080|Cluster-31803.103688|Cluster-31803.61151
Lysine biosynthesis	ko00300	2	131	1	Cluster-31803.44786|Cluster-31803.73217
Fatty acid degradation	ko00071	6	402	1	Cluster-31803.100681|Cluster-31803.57080|Cluster-31803.58575|Cluster-31803.60679|Cluster-31803.70489|Cluster-31803.61151
Sulfur relay system	ko04122	2	134	1	Cluster-31803.46206|Cluster-31803.83619
Butanoate metabolism	ko00650	3	204	1	Cluster-31803.56356|Cluster-31803.57237|Cluster-31803.51795
mRNA surveillance pathway	ko03015	10	679	1	Cluster-31803.96334|Cluster-31803.58858|Cluster-31803.55741|Cluster-31803.67910|Cluster-31803.87358|Cluster-31803.31978|Cluster-31803.43332|Cluster-31803.36572|Cluster-31803.80588|Cluster-31803.34725
Plant-pathogen interaction	ko04626	6	430	1	Cluster-31803.26033|Cluster-31803.66603|Cluster-31803.16647|Cluster-31803.56324|Cluster-31803.56326|Cluster-31803.77143
Cell cycle - Caulobacter	ko04112	2	150	1	Cluster-31803.91130|Cluster-31803.57008
Glycerophospholipid metabolism	ko00564	7	514	1	Cluster-31803.77106|Cluster-31803.18428|Cluster-31803.25127|Cluster-31803.46099|Cluster-31803.35473|Cluster-31803.39193|Cluster-31803.59509
Phenylpropanoid biosynthesis	ko00940	1	82	1	Cluster-31803.68237
Fructose and mannose metabolism	ko00051	5	384	1	Cluster-31803.43543|Cluster-31803.43125|Cluster-31803.69560|Cluster-31803.51843|Cluster-31803.76575
Valine, leucine and isoleucine degradation	ko00280	8	595	1	Cluster-31803.100681|Cluster-31803.32844|Cluster-31803.86487|Cluster-31803.58575|Cluster-31803.70212|Cluster-31803.55448|Cluster-31803.49158|Cluster-31803.47117
Fatty acid biosynthesis	ko00061	4	326	1	Cluster-31803.17167|Cluster-31803.103688|Cluster-31803.98783|Cluster-31803.96146
Non-homologous end-joining	ko03450	1	97	1	Cluster-31803.52775
Galactose metabolism	ko00052	4	344	1	Cluster-31803.79605|Cluster-31803.43125|Cluster-31803.79356|Cluster-31803.97449
One carbon pool by folate	ko00670	2	192	1	Cluster-31803.11513|Cluster-31803.25058
beta-Alanine metabolism	ko00410	4	352	1	Cluster-31803.100681|Cluster-31803.58575|Cluster-31803.49158|Cluster-31803.43220
Glycine, serine and threonine metabolism	ko00260	7	576	1	Cluster-31803.64622|Cluster-31803.86487|Cluster-31803.17904|Cluster-31803.88800|Cluster-31803.17903|Cluster-31803.68478|Cluster-31803.70212
Base excision repair	ko03410	3	276	1	Cluster-31803.61247|Cluster-31803.52775|Cluster-31803.35069
Isoquinoline alkaloid biosynthesis	ko00950	1	107	1	Cluster-31803.96261
Other glycan degradation	ko00511	1	108	1	Cluster-31803.59090
RNA degradation	ko03018	10	797	1	Cluster-31803.57997|Cluster-31803.11969|Cluster-31803.9348|Cluster-31803.9349|Cluster-31803.66273|Cluster-31803.74538|Cluster-31803.18308|Cluster-31803.8665|Cluster-31803.49530|Cluster-31803.65801
Protein processing in endoplasmic reticulum	ko04141	17	1294	1	Cluster-31803.66603|Cluster-31803.41087|Cluster-31803.62119|Cluster-31803.75419|Cluster-31803.69860|Cluster-31803.58331|Cluster-31803.73353|Cluster-31803.56326|Cluster-31803.56324|Cluster-31803.51998|Cluster-31803.93396|Cluster-31803.78115|Cluster-31803.54244|Cluster-31803.71567|Cluster-31803.36316|Cluster-31803.60519|Cluster-31803.61629
N-Glycan biosynthesis	ko00510	4	373	1	Cluster-31803.63324|Cluster-31803.85154|Cluster-31803.75925|Cluster-31803.72505
Terpenoid backbone biosynthesis	ko00900	3	307	1	Cluster-31803.48646|Cluster-31803.56130|Cluster-31803.32771
Homologous recombination	ko03440	3	308	1	Cluster-31803.54457|Cluster-31803.61247|Cluster-31803.74086
RNA polymerase	ko03020	4	398	1	Cluster-31803.27714|Cluster-31803.60619|Cluster-31803.62588|Cluster-31803.99556
Pentose and glucuronate interconversions	ko00040	2	250	1	Cluster-31803.100681|Cluster-31803.58575
Citrate cycle (TCA cycle)	ko00020	6	588	1	Cluster-31803.31757|Cluster-31803.58950|Cluster-31803.87544|Cluster-31803.61450|Cluster-31803.80535|Cluster-31803.70212
Photosynthesis	ko00195	1	155	1	Cluster-31803.11237
Lysine degradation	ko00310	2	264	1	Cluster-31803.100681|Cluster-31803.58575
Regulation of autophagy	ko04140	2	278	1	Cluster-31803.66596|Cluster-31803.57780
Thiamine metabolism	ko00730	1	175	1	Cluster-31803.48646
RNA transport	ko03013	12	1108	1	Cluster-31803.91312|Cluster-31803.49365|Cluster-31803.84344|Cluster-31803.67910|Cluster-31803.87358|Cluster-31803.31978|Cluster-31803.89202|Cluster-31803.25785|Cluster-31803.13337|Cluster-31803.80477|Cluster-31803.93422|Cluster-31803.98393
Valine, leucine and isoleucine biosynthesis	ko00290	1	179	1	Cluster-31803.32844
Pyrimidine metabolism	ko00240	12	1134	1	Cluster-31803.60619|Cluster-31803.62588|Cluster-31803.43220|Cluster-31803.44612|Cluster-31803.99556|Cluster-31803.47671|Cluster-31803.39898|Cluster-31803.61247|Cluster-31803.39965|Cluster-31803.27714|Cluster-31803.53255|Cluster-31803.49530
Steroid biosynthesis	ko00100	1	207	1	Cluster-31803.52681
Proteasome	ko03050	3	441	1	Cluster-31803.56787|Cluster-31803.48349|Cluster-31803.35285
Phagosome	ko04145	4	552	1	Cluster-31803.54244|Cluster-31803.71567|Cluster-31803.51698|Cluster-31803.78115
Ubiquitin mediated proteolysis	ko04120	8	984	1	Cluster-31803.80851|Cluster-31803.44542|Cluster-31803.13337|Cluster-31803.93397|Cluster-31803.44531|Cluster-31803.71990|Cluster-31803.47242|Cluster-31803.71686
Aminoacyl-tRNA biosynthesis	ko00970	5	751	1	Cluster-31803.82867|Cluster-10661.0|Cluster-31803.94937|Cluster-31803.29999|Cluster-31803.102604
Ribosome biogenesis in eukaryotes	ko03008	6	911	1	Cluster-31803.78887|Cluster-31803.70101|Cluster-31803.69617|Cluster-31803.31894|Cluster-31803.104430|Cluster-31803.28956
Spliceosome	ko03040	11	1501	1	Cluster-31803.40153|Cluster-31803.37064|Cluster-31803.55940|Cluster-31803.82952|Cluster-31803.74626|Cluster-31803.78820|Cluster-31803.66075|Cluster-31803.55564|Cluster-31803.56854|Cluster-31803.59041|Cluster-31803.60519
Endocytosis	ko04144	5	990	1	Cluster-31803.60519|Cluster-31803.77210|Cluster-31803.30760|Cluster-31803.52147|Cluster-31803.26264
Oxidative phosphorylation	ko00190	2	757	1	Cluster-31803.55742|Cluster-31803.58463
Ribosome	ko03010	3	1493	1	Cluster-31803.56900|Cluster-31803.56897|Cluster-31803.77397
