# Supplementary material for: Lipid accumulation of Chlorella sp. TLD6B from the Taklimakan Desert under salt stress
Source: PeerJ. 2021 May 31;9:e11525. doi: 10.7717/peerj.11525 (PMC8174150; doi:10.7717/peerj.11525)
Supplement: Supplemental Information 10 — CK, the control; indicates log2FC < 1; Inf, Infinity; CK18, the sample collected from the control group on day 18; Nacl1, samples collected from the low salinity treatment (0.1 M NaCl addition) on day 18; Nacl2, samples collected from the high salinity treatment (0.8 M NaCl addition) on day 18. Enzyme names are defined in Figs. 3 and 6. [file peerj-09-11525-s010.xlsx]

## Sheet: Table S10
Table S10 Log2(fold-change) in expression values of genes associated with central carbon metabolism, fatty acid biosynthesis, and TAG biosynthesis in Chlorella sp. TLD6B under low (0.1 M NaCl addition, Nacl1) and high (0.8 M NaCl addition, Nacl2) salt treatments.
Category	Enzyme	Gene ID	Log2FC		Putative annotation
			Nacl1/CK18	Nacl2/CK18
Glycolysis	HXK	Cluster-31803.39773	\	−2.6179	Hexokinase-6
	HXK	Cluster-31803.82396	\	3.0157	Hexokinase-1
	HXK	Cluster-31803.29374	\	3.4313	Hexokinase-1
	HXK	Cluster-31803.39379	Inf	\	Hexokinase-1
	HXK	Cluster-31803.43125	Inf	Inf	Hexokinase-1
	PK	Cluster-31803.36987	\	3.4522	Plastidial pyruvate kinase 3
	PK	Cluster-31803.46432	2.0307	3.053	Pyruvate kinase isozyme A
	PK	Cluster-31803.75598	2.6103	2.3826	Pyruvate kinase
	PK	Cluster-31803.72031	\	3.4254	Pyruvate kinase
	PK	Cluster-31803.75605	\	2.1177	Pyruvate kinase
	PK	Cluster-31803.75602	\	2.1874	Pyruvate kinase
	PK	Cluster-31803.75599	\	1.9854	Pyruvate kinase
	PK	Cluster-31803.30029	\	0.85683	Pyruvate kinase
	PFK	Cluster-31803.47456	\	2.864	ATP-dependent 6-phosphofructokinase 5
	PFK	Cluster-31803.65032	\	1.5614	ATP-dependent 6-phosphofructokinase 5
	PFK	Cluster-31803.59522	\	1.5538	ATP-dependent 6-phosphofructokinase 5
	PFK	Cluster-31803.54985	\	1.3165	ATP-dependent 6-phosphofructokinase 5
	PFK	Cluster-31803.47252	\	4.6656	ATP-dependent 6-phosphofructokinase 5
	PFK	Cluster-31803.113569	\	−3.1488	ATP-dependent 6-phosphofructokinase 6
Starch and sucrose metabolism	AMY	Cluster-31803.62982	\	2.6214	Alpha-amylase 3
Glycerophospholipid metabolism	ACL	Cluster-31803.60849	\	5.7275	ATP-citrate synthase alpha chain protein 1
Glycolysis/Gluconeogenesis	PDC	Cluster-31803.102796	\	2.7876	Pyruvate decarboxylase 1
	PDH	Cluster-31803.47086	\	7.7207	Pyruvate dehydrogenase E1 component subunit beta-1
	PDH	Cluster-31803.47084	\	2.4576	Pyruvate dehydrogenase E1 component subunit beta-1
	PDH	Cluster-31803.44655	\	1.0199	Pyruvate dehydrogenase E1 component subunit beta-1
	PDH	Cluster-31803.80535	1.9013	1.2657	Pyruvate dehydrogenase E1 component subunit alpha-3
Pyruvate metabolism	ME	Cluster-31803.57195	\	3.6934	NAD-dependent malic enzyme 2
	ME	Cluster-31803.47955	\	3.5615	NADP-dependent malic enzyme
	ME	Cluster-31803.64648	\	7.067	NAD-dependent malic enzyme 2
	ME	Cluster-31803.25313	\	1.9441	NADP-dependent malic enzyme
	ME	Cluster-31803.47957	\	4.2193	NADP-dependent malic enzyme
	ME	Cluster-31803.57194	\	4.258	NAD-dependent malic enzyme 2
	ME	Cluster-31803.25312	\	1.7246	NADP-dependent malic enzyme
	ME	Cluster-31803.68148	\	1.4961	NAD-dependent malic enzyme 2
	PEPC	Cluster-31803.33465	\	1.6054	Phosphoenolpyruvate carboxylase 2
	PEPC	Cluster-31803.21254	\	2.3513	Phosphoenolpyruvate carboxylase 2
	PEPC	Cluster-31803.81623	\	3.9278	Phosphoenolpyruvate carboxylase 2
	PEPC	Cluster-31803.38430	\	2.8224	Phosphoenolpyruvate carboxylase 2
	PEPC	Cluster-31803.31282	\	6.2114	Phosphoenolpyruvate carboxylase 2
	PEPC	Cluster-31803.102126	2.0206	2.6077	Phosphoenolpyruvate carboxylase 2
	PEPC	Cluster-31803.102127	2.2418	2.5899	Phosphoenolpyruvate carboxylase 2
	PEPC	Cluster-31803.103445	\	3.0227	Phosphoenolpyruvate carboxylase 2
Pentose phosphate pathway	G6PD	Cluster-31803.56093	1.8846	3.1618	Glucose-6-phosphate 1-dehydrogenase
	G6PD	Cluster-31803.60272	\	2.7284	Glucose-6-phosphate 1-dehydrogenase 2
	G6PD	Cluster-31803.41781	\	1.6821	Glucose-6-phosphate 1-dehydrogenase
	G6PD	Cluster-31803.69381	\	2.5927	Glucose-6-phosphate 1-dehydrogenase
	G6PD	Cluster-31803.41780	\	1.8353	Glucose-6-phosphate 1-dehydrogenase
	G6PD	Cluster-31803.41777	\	−4.0677	Glucose-6-phosphate 1-dehydrogenase
	G6PD	Cluster-31803.51478	−6.957	\	Glucose-6-phosphate 1-dehydrogenase
De novo fatty acid biosynthesis	LACS	Cluster-31803.60797	\	2.062	Long chain acyl-CoA synthetase 4
	LACS	Cluster-31803.39477	\	1.8685	Long chain acyl-CoA synthetase 3
	LACS	Cluster-31803.56570	\	1.3891	Long chain acyl-CoA synthetase 4
CK, the control; “\” indicates log2FC < 1; Inf, Infinity; CK18, the sample collected from the control group on day 18; Nacl1, samples collected from the low salinity treatment (0.1 M NaCl addition) on day 18; Nacl2, samples collected from the high salinity treatment (0.8 M NaCl addition) on day 18. Enzyme names are defined in Figures 3 and 6.
