# Supplementary material for: Lipid accumulation of Chlorella sp. TLD6B from the Taklimakan Desert under salt stress
Source: PeerJ. 2021 May 31;9:e11525. doi: 10.7717/peerj.11525 (PMC8174150; doi:10.7717/peerj.11525)
Supplement: Supplemental Information 11 — CK, the control; indicates log2FC < 1; CK18, the sample collected from the control group on day 18; Nacl1, samples collected from the low salinity treatment (0.1 M NaCl addition) on day 18; Nacl2, samples collected from the high salinity treatment (0.8 M NaCl addition) on day 18. Abbreviated enzyme names are defined in Fig. 7. [file peerj-09-11525-s011.xlsx]

## Sheet: Table S11
Table S11 Data of Figure 7.
Enzyme	Gene ID	Log2FC		Putative annotation
		Nacl1/CK18	Nacl2/CK18
BC	Cluster-31803.98783	1.7218	0.97351	Biotin carboxylase 1
BC	Cluster-31803.100315	\	4.2053	Biotin carboxylase 1
BC	Cluster-31803.101505	1.6844	\	Biotin carboxylase 1
BCCP	Cluster-31803.78413	4.9613	4.0361	Biotin carboxyl carrier protein of acetyl-CoA
α-CT	Cluster-31803.29741	\	2.6769	Acetyl-coenzyme A carboxylase carboxyl transferase subunit alpha
MCAT	Cluster-31803.71595	\	1.3558	Malonyl-CoA-acyl carrier protein transacylase
KASⅡ	Cluster-31803.17167	3.6334	3.0312	3-oxoacyl-[acyl-carrier-protein] synthase II
KASⅡ	Cluster-31803.96146	1.3577	1.8414	3-oxoacyl-[acyl-carrier-protein] synthase I
FAD	Cluster-31803.83020	\	-4.4846	Omega-3 fatty acid desaturase
FAD	Cluster-31803.96909	1.4823	\	Temperature-sensitive omega-3 fatty acid desaturase
SAD	Cluster-31803.73844	\	1.184	Acyl-[acyl-carrier-protein] desaturase 2
SAD	Cluster-31803.73842	\	1.1268	Acyl-[acyl-carrier-protein] desaturase 1
SAD	Cluster-31803.73850	\	3.3981	Acyl-[acyl-carrier-protein] desaturase 2
SAD	Cluster-31803.15683	-2.2221	\	Acyl-[acyl-carrier-protein] desaturase
CK, the control; “\” indicates log2FC < 1; CK18, the sample collected from the control group on day 18; Nacl1, samples collected from the low salinity treatment (0.1 M NaCl addition) on day 18; Nacl2, samples collected from the high salinity treatment (0.8 M NaCl addition) on day 18. Abbreviated enzyme names are defined in Figure 7.
