# Supplementary material for: Lipid accumulation of Chlorella sp. TLD6B from the Taklimakan Desert under salt stress
Source: PeerJ. 2021 May 31;9:e11525. doi: 10.7717/peerj.11525 (PMC8174150; doi:10.7717/peerj.11525)
Supplement: Supplemental Information 12 — CK, the control; indicates log2FC < 1. Abbreviated enzyme names are defined in Fig. 8. [file peerj-09-11525-s012.xlsx]

## Sheet: Table S12
Table S12 Data of Figure 8.
Enzyme	Gene ID	Log2FC		Putative annotation
		Nacl1/CK18	Nacl2/CK18
TPI	Cluster-31803.69560	2.6379	4.9892	Triosephosphate isomerase
TPI	Cluster-31803.49035	\	1.5708	Triosephosphate isomerase
TPI	Cluster-31803.43543	3.4154	2.9458	Triosephosphate isomerase
GPD	Cluster-31803.58466	\	4.0917	Glycerol-3-phosphate dehydrogenase
GPD	Cluster-31803.52491	\	5.3303	Glycerol-3-phosphate dehydrogenase
GPD	Cluster-31803.50166	\	3.6374	Glycerol-3-phosphate dehydrogenase
GPD	Cluster-31803.41979	\	2.0234	Glycerol-3-phosphate dehydrogenase
GK	Cluster-31803.21954	\	1.9609	Glycerol kinase
DGAT	Cluster-31803.71848	\	2.4836	Diacylglycerol O-acyltransferase 1
DGAT	Cluster-31803.71852	\	3.2196	Diacylglycerol O-acyltransferase 1
DGAT	Cluster-31803.65991	-4.244	-2.4599	Diacylglycerol O-acyltransferase 2
DGAT	Cluster-31803.77436	\	4.0865	Diacylglycerol O-acyltransferase 2
DGAT	Cluster-31803.86613	-2.4855	-2.2527	Diacylglycerol O-acyltransferase 2
DGAT	Cluster-31803.30319	\	2.4856	Diacylglycerol O-acyltransferase 2
DGAT	Cluster-31803.74973	\	1.9809	Diacylglycerol O-acyltransferase 2
DGAT	Cluster-31803.28938	\	4.4349	Diacylglycerol O-acyltransferase 2A
CK, the control; "\" indicates log2FC < 1. Abbreviated enzyme names are defined in Figure 8.
